# Supplementary material for: Dichloroacetate reverses sepsis-induced hepatic metabolic dysfunction
Source: eLife. 2021 Feb 22;10:e64611. doi: 10.7554/eLife.64611 (PMC7901874; doi:10.7554/eLife.64611)
Supplement: Source data 1. [file elife-64611-data1.xlsx]

## Sheet: Lipid Class Concentrations
TrueMass® Complex Lipid Panel: Lipid Class Concentrations
Project Code:	WAKE-0204-18VWCLP
		Sample Name	WAKE-01208-01	WAKE-01209-01	WAKE-01210-01	WAKE-01211-01	WAKE-01212-01	WAKE-01213-01	WAKE-01214-01	WAKE-01215-01	WAKE-01216-01	WAKE-01217-01	WAKE-01218-01	WAKE-01219-01	WAKE-01220-01	WAKE-01221-01	WAKE-01222-01	WAKE-01223-01	WAKE-01224-01	WAKE-01225-01	WAKE-01226-01	WAKE-01227-01	WAKE-01228-01
		CLIENT IDENTIFIER	Sham4	Sham5	Sham6	Sham7	Sham8	CLP1	CLP2	CLP3	CLP4	CLP5	CLP6	CLP7	CLP8	DCA1	DCA2	DCA3	DCA4	DCA5	DCA6	DCA7	DCA8
		AGE	8wk	8wk	8wk	8wk	8wk	8wk	8wk	8wk	8wk	8wk	8wk	8wk	8wk	8wk	8wk	8wk	8wk	8wk	8wk	8wk	8wk
		AMOUNT EXTRACTED CLP	75	75	75	75	75	75	75	75	75	75	75	75	75	75	75	75	75	75	75	75	75
		BRADFORD CLP	13.238	9.19	11.778	9.73	9.801	8.604	12.735	9.121	8.822	9.049	8.744	8.788	9.677	9.331	10.476	11.423	11.957	10.915	8.045	8.718	7.411
		CELL LINE	Primary cells	Primary cells	Primary cells	Primary cells	Primary cells	Primary cells	Primary cells	Primary cells	Primary cells	Primary cells	Primary cells	Primary cells	Primary cells	Primary cells	Primary cells	Primary cells	Primary cells	Primary cells	Primary cells	Primary cells	Primary cells
		GENDER	M	M	M	M	M	M	M	M	M	M	M	M	M	M	M	M	M	M	M	M	M
		ORIG ORDER	4	5	6	7	8	9	10	11	12	13	14	15	16	17	18	19	20	21	22	23	24
		SPL AMNT	150-200 ul cell pellet	150-200 ul cell pellet	150-200 ul cell pellet	150-200 ul cell pellet	150-200 ul cell pellet	150-200 ul cell pellet	150-200 ul cell pellet	150-200 ul cell pellet	150-200 ul cell pellet	150-200 ul cell pellet	150-200 ul cell pellet	150-200 ul cell pellet	150-200 ul cell pellet	150-200 ul cell pellet	150-200 ul cell pellet	150-200 ul cell pellet	150-200 ul cell pellet	150-200 ul cell pellet	150-200 ul cell pellet	150-200 ul cell pellet	150-200 ul cell pellet
		SPL TYPE	cells	cells	cells	cells	cells	cells	cells	cells	cells	cells	cells	cells	cells	cells	cells	cells	cells	cells	cells	cells	cells
		SUBJ ID	C57/BL6 mouse	C57/BL6 mouse	C57/BL6 mouse	C57/BL6 mouse	C57/BL6 mouse	C57/BL6 mouse	C57/BL6 mouse	C57/BL6 mouse	C57/BL6 mouse	C57/BL6 mouse	C57/BL6 mouse	C57/BL6 mouse	C57/BL6 mouse	C57/BL6 mouse	C57/BL6 mouse	C57/BL6 mouse	C57/BL6 mouse	C57/BL6 mouse	C57/BL6 mouse	C57/BL6 mouse	C57/BL6 mouse
		TIME POINT	30 hr	30 hr	30 hr	30 hr	30 hr	30 hr	30 hr	30 hr	30 hr	30 hr	30 hr	30 hr	30 hr	30 hr	30 hr	30 hr	30 hr	30 hr	30 hr	30 hr	30 hr
		TREATMENT	None	None	None	None	None	CLP/PBS	CLP/PBS	CLP/PBS	CLP/PBS	CLP/PBS	CLP/PBS	CLP/PBS	CLP/PBS	CLP/DCA	CLP/DCA	CLP/DCA	CLP/DCA	CLP/DCA	CLP/DCA	CLP/DCA	CLP/DCA
		TX	Sham	Sham	Sham	Sham	Sham	CLP/PBS	CLP/PBS	CLP/PBS	CLP/PBS	CLP/PBS	CLP/PBS	CLP/PBS	CLP/PBS	CLP/DCA	CLP/DCA	CLP/DCA	CLP/DCA	CLP/DCA	CLP/DCA	CLP/DCA	CLP/DCA
		GROUP NAME	11.8.18 30hr sham mouse hepatocytes	11.8.18 30hr sham mouse hepatocytes	9.13.18 30hr sham mouse hepatocytes	10.9.18 30hr sham mouse hepayocytes	10.9.18 30hr sham mouse hepayocytes	11.8.18 30hr CLP mouse hepatocytes	9.20.18 30hr CLP mouse hepatocytes	10.11.18 30hr CLP mouse hepatocytes	9.25.18 30hr CLP mouse hepatocytes	10.11.18 30hr CLP mouse hepatocytes	9.27.18 30hr CLP mouse hepatocytes	10.4.18 30hr CLP mouse hepatocytes	10.9.18 30hr CLP mouse hepatocytes	9.18.18 30hr CLP+DCA mouse hepatocytes	9.18.18 30hr CLP+DCA mouse hepatocytes	9.20.18 30hr CLP+DCA mouse hepatocytes	9.25.18 30hr CLP+DCA mouse hepatocytes	9.27.18 30hr CLP+DCA mouse hepatocytes	9.27.18 30hr CLP+DCA mouse hepatocytes	10.4.18 30hr CLP+DCA mouse hepatocytes	10.4.18 30hr CLP+DCA mouse hepatocytes
Class	Name	Group Units	1	1	1	1	1	2	2	2	2	2	2	2	2	3	3	3	3	3	3	3	3
CE	CE	uM	3.3107	8.0995	3.5608	6.1143	5.888	17.3754	2.5549	9.2179	1.5223	3.3091	3.0141	16.3396	17.2644	12.0543	4.2678	11.698	4.955	9.2638	17.3861	16.9604	16.6777
CER	CER	uM	1.7069	1.1298	1.09	1.1837	1.1639	1.8292	1.8266	1.2925	1.0786	0.7382	1.1094	1.6619	1.506	1.5766	1.5517	1.1082	1.2049	1.2676	1.0548	1.1485	1.0915
DAG	DAG	uM	4.3135	6.3024	4.0197	6.1141	6.2627	16.3944	6.5376	12.291	17.2496	15.8959	18.2431	19.0458	13.4736	5.2267	3.5158	7.451	2.966	4.8042	5.3086	12.108	8.5694
DCER	DCER	uM	0.2296	0.1911	0.1797	0.1753	0.1799	0.3152	0.2753	0.299	0.226	0.1414	0.2701	0.3179	0.2541	0.2659	0.2364	0.1699	0.1925	0.1927	0.1774	0.1993	0.2011
FFA	FFA	uM	32.1657	40.6288	29.3836	35.695	36.2992	56.3415	33.324	43.1864	56.0921	50.0147	55.5256	50.3089	45.4331	45.0516	31.4247	33.8247	26.0068	33.9115	36.5233	39.898	40.8565
HCER	HCER	uM	0.2268	0.3751	0.2282	0.3959	0.3932	0.306	0.3996	0.2312	0.3247	0.2615	0.2545	0.2481	0.3095	0.2271	0.2252	0.3217	0.1559	0.2897	0.2458	0.2201	0.3057
LCER	LCER	uM	0.0275	0.0345	0.028	0.0304	0.0344	0.0302	0.0341	0.0279	0.0343	0.0323	0.0276	0.0302	0.0268	0.0312	0.0284	0.0246	0.0235	0.0304	0.0382	0.0307	0.0339
LPC	LPC	uM	1.0889	1.2416	0.8594	1.157	1.0956	0.6711	0.7011	0.6951	0.5172	0.5535	0.5052	0.7492	0.8005	0.7117	0.9347	0.9444	1.068	1.2637	1.0785	0.9483	1.1437
LPE	LPE	uM	0.4252	0.4656	0.3874	0.3909	0.4141	0.3719	0.3658	0.3904	0.2636	0.2342	0.299	0.4742	0.4271	0.3829	0.4171	0.3961	0.3853	0.477	0.4307	0.3971	0.3925
MAG	MAG	uM	0.6598	1.4158	0.4484	0.9142	0.6786	1.2642	1.1392	2.2738	1.8873	1.0315	1.0349	2.1109	1.1469	0.9061	0.5909	0.9264	0.515	0.7889	0.4736	0.7109	1.1447
PC	PC	uM	170.57	159.082	122.058	141.296	138.08	171.413	166.058	153.131	188.301	190.051	181.717	207.211	191.517	149.38	135.498	141.251	119.36	163.782	145.957	146.406	150.458
PE	PE	uM	140.897	114.741	81.2916	94.9142	100.904	138.498	151.142	136.606	163.922	151.612	130.466	156.119	161.806	106.655	97.7195	108.163	80.5274	123.213	102.871	108.329	103.888
PI	PI	uM	11.3227	10.7999	7.5534	6.3956	7.9582	8.9554	7.7524	7.3428	8.5903	8.187	8.6155	13.481	9.775	5.5185	7.094	7.6222	8.2315	6.4964	7.0678	5.9367	7.2071
SM	SM	uM	15.1746	15.2359	10.2329	14.763	14.2592	21.7546	15.5522	19.9778	19.6929	19.2801	20.7091	25.3712	22.3535	13.2841	11.4111	14.4025	12.1076	16.4976	16.8353	15.2428	16.2484
TAG	TAG	uM	20.5688	44.2741	13.9534	46.9463	45.3371	399.813	56.6226	325.428	178.979	146.587	348.028	374.627	389.34	66.4202	19.4127	104.154	11.6404	36.72	53.0261	207.047	98.5501

## Sheet: Lipid Class Compositions
TrueMass® Complex Lipid Panel: Lipid Class Compositions
Project Code:	WAKE-0204-18VWCLP
		Sample Name	WAKE-01208-01	WAKE-01209-01	WAKE-01210-01	WAKE-01211-01	WAKE-01212-01	WAKE-01213-01	WAKE-01214-01	WAKE-01215-01	WAKE-01216-01	WAKE-01217-01	WAKE-01218-01	WAKE-01219-01	WAKE-01220-01	WAKE-01221-01	WAKE-01222-01	WAKE-01223-01	WAKE-01224-01	WAKE-01225-01	WAKE-01226-01	WAKE-01227-01	WAKE-01228-01
		CLIENT IDENTIFIER	Sham4	Sham5	Sham6	Sham7	Sham8	CLP1	CLP2	CLP3	CLP4	CLP5	CLP6	CLP7	CLP8	DCA1	DCA2	DCA3	DCA4	DCA5	DCA6	DCA7	DCA8
		AGE	8wk	8wk	8wk	8wk	8wk	8wk	8wk	8wk	8wk	8wk	8wk	8wk	8wk	8wk	8wk	8wk	8wk	8wk	8wk	8wk	8wk
		AMOUNT EXTRACTED CLP	75	75	75	75	75	75	75	75	75	75	75	75	75	75	75	75	75	75	75	75	75
		BRADFORD CLP	13.238	9.19	11.778	9.73	9.801	8.604	12.735	9.121	8.822	9.049	8.744	8.788	9.677	9.331	10.476	11.423	11.957	10.915	8.045	8.718	7.411
		CELL LINE	Primary cells	Primary cells	Primary cells	Primary cells	Primary cells	Primary cells	Primary cells	Primary cells	Primary cells	Primary cells	Primary cells	Primary cells	Primary cells	Primary cells	Primary cells	Primary cells	Primary cells	Primary cells	Primary cells	Primary cells	Primary cells
		GENDER	M	M	M	M	M	M	M	M	M	M	M	M	M	M	M	M	M	M	M	M	M
		ORIG ORDER	4	5	6	7	8	9	10	11	12	13	14	15	16	17	18	19	20	21	22	23	24
		SPL AMNT	150-200 ul cell pellet	150-200 ul cell pellet	150-200 ul cell pellet	150-200 ul cell pellet	150-200 ul cell pellet	150-200 ul cell pellet	150-200 ul cell pellet	150-200 ul cell pellet	150-200 ul cell pellet	150-200 ul cell pellet	150-200 ul cell pellet	150-200 ul cell pellet	150-200 ul cell pellet	150-200 ul cell pellet	150-200 ul cell pellet	150-200 ul cell pellet	150-200 ul cell pellet	150-200 ul cell pellet	150-200 ul cell pellet	150-200 ul cell pellet	150-200 ul cell pellet
		SPL TYPE	cells	cells	cells	cells	cells	cells	cells	cells	cells	cells	cells	cells	cells	cells	cells	cells	cells	cells	cells	cells	cells
		SUBJ ID	C57/BL6 mouse	C57/BL6 mouse	C57/BL6 mouse	C57/BL6 mouse	C57/BL6 mouse	C57/BL6 mouse	C57/BL6 mouse	C57/BL6 mouse	C57/BL6 mouse	C57/BL6 mouse	C57/BL6 mouse	C57/BL6 mouse	C57/BL6 mouse	C57/BL6 mouse	C57/BL6 mouse	C57/BL6 mouse	C57/BL6 mouse	C57/BL6 mouse	C57/BL6 mouse	C57/BL6 mouse	C57/BL6 mouse
		TIME POINT	30 hr	30 hr	30 hr	30 hr	30 hr	30 hr	30 hr	30 hr	30 hr	30 hr	30 hr	30 hr	30 hr	30 hr	30 hr	30 hr	30 hr	30 hr	30 hr	30 hr	30 hr
		TREATMENT	None	None	None	None	None	CLP/PBS	CLP/PBS	CLP/PBS	CLP/PBS	CLP/PBS	CLP/PBS	CLP/PBS	CLP/PBS	CLP/DCA	CLP/DCA	CLP/DCA	CLP/DCA	CLP/DCA	CLP/DCA	CLP/DCA	CLP/DCA
		TX	Sham	Sham	Sham	Sham	Sham	CLP/PBS	CLP/PBS	CLP/PBS	CLP/PBS	CLP/PBS	CLP/PBS	CLP/PBS	CLP/PBS	CLP/DCA	CLP/DCA	CLP/DCA	CLP/DCA	CLP/DCA	CLP/DCA	CLP/DCA	CLP/DCA
		GROUP NAME	11.8.18 30hr sham mouse hepatocytes	11.8.18 30hr sham mouse hepatocytes	9.13.18 30hr sham mouse hepatocytes	10.9.18 30hr sham mouse hepayocytes	10.9.18 30hr sham mouse hepayocytes	11.8.18 30hr CLP mouse hepatocytes	9.20.18 30hr CLP mouse hepatocytes	10.11.18 30hr CLP mouse hepatocytes	9.25.18 30hr CLP mouse hepatocytes	10.11.18 30hr CLP mouse hepatocytes	9.27.18 30hr CLP mouse hepatocytes	10.4.18 30hr CLP mouse hepatocytes	10.9.18 30hr CLP mouse hepatocytes	9.18.18 30hr CLP+DCA mouse hepatocytes	9.18.18 30hr CLP+DCA mouse hepatocytes	9.20.18 30hr CLP+DCA mouse hepatocytes	9.25.18 30hr CLP+DCA mouse hepatocytes	9.27.18 30hr CLP+DCA mouse hepatocytes	9.27.18 30hr CLP+DCA mouse hepatocytes	10.4.18 30hr CLP+DCA mouse hepatocytes	10.4.18 30hr CLP+DCA mouse hepatocytes
Class	Name	Group Units	1	1	1	1	1	2	2	2	2	2	2	2	2	3	3	3	3	3	3	3	3
CE	CE	Mol%	0.8221	2.0047	1.2935	1.7152	1.6404	2.0801	0.5751	1.2939	0.2384	0.5628	0.3915	1.8822	2.0182	2.9567	1.3577	2.705	1.8397	2.3218	4.4755	3.0527	3.733
CER	CER	Mol%	0.4239	0.2796	0.396	0.332	0.3242	0.219	0.4111	0.1814	0.1689	0.1256	0.1441	0.1914	0.1761	0.3867	0.4936	0.2563	0.4473	0.3177	0.2715	0.2067	0.2443
DAG	DAG	Mol%	1.0712	1.5599	1.4602	1.7151	1.7447	1.9626	1.4715	1.7253	2.7008	2.7037	2.3698	2.194	1.5751	1.282	1.1185	1.723	1.1012	1.2041	1.3665	2.1793	1.9181
DCER	DCER	Mol%	0.057	0.0473	0.0653	0.0492	0.0501	0.0377	0.062	0.042	0.0354	0.0241	0.0351	0.0366	0.0297	0.0652	0.0752	0.0393	0.0715	0.0483	0.0457	0.0359	0.045
FFA	FFA	Mol%	7.9878	10.0562	10.6743	10.013	10.1127	6.7448	7.5006	6.0622	8.7825	8.5069	7.2128	5.7953	5.3111	11.0504	9.9974	7.8215	9.6558	8.4991	9.4017	7.1813	9.1449
HCER	HCER	Mol%	0.0563	0.0928	0.0829	0.1111	0.1095	0.0366	0.09	0.0325	0.0508	0.0445	0.0331	0.0286	0.0362	0.0557	0.0717	0.0744	0.0579	0.0726	0.0633	0.0396	0.0684
LCER	LCER	Mol%	0.0068	0.0086	0.0102	0.0085	0.0096	0.0036	0.0077	0.0039	0.0054	0.0055	0.0036	0.0035	0.0031	0.0077	0.009	0.0057	0.0087	0.0076	0.0098	0.0055	0.0076
LPC	LPC	Mol%	0.2704	0.3073	0.3122	0.3246	0.3052	0.0803	0.1578	0.0976	0.081	0.0941	0.0656	0.0863	0.0936	0.1746	0.2974	0.2184	0.3965	0.3167	0.2776	0.1707	0.256
LPE	LPE	Mol%	0.1056	0.1153	0.1407	0.1096	0.1154	0.0445	0.0823	0.0548	0.0413	0.0398	0.0388	0.0546	0.0499	0.0939	0.1327	0.0916	0.143	0.1196	0.1109	0.0715	0.0879
MAG	MAG	Mol%	0.1638	0.3504	0.1629	0.2564	0.189	0.1513	0.2564	0.3192	0.2955	0.1754	0.1344	0.2432	0.1341	0.2223	0.188	0.2142	0.1912	0.1977	0.1219	0.1279	0.2562
PC	PC	Mol%	42.3579	39.3751	44.3406	39.6358	38.4679	20.5204	37.3764	21.4954	29.4828	32.3255	23.6052	23.8696	22.3883	36.6404	43.1071	32.6624	44.3158	41.0483	37.5719	26.3518	33.677
PE	PE	Mol%	34.9892	28.4	29.5311	26.6249	28.1111	16.58	34.0192	19.1757	25.6657	25.7875	16.9476	17.9841	18.9151	26.1607	31.0884	25.0113	29.8981	30.8805	26.4807	19.4982	23.2532
PI	PI	Mol%	2.8118	2.6731	2.744	1.7941	2.2171	1.0721	1.7449	1.0307	1.345	1.3925	1.1192	1.5529	1.1427	1.3536	2.2569	1.7625	3.0562	1.6282	1.8194	1.0686	1.6132
SM	SM	Mol%	3.7683	3.7711	3.7173	4.1413	3.9725	2.6043	3.5005	2.8043	3.0834	3.2793	2.6901	2.9226	2.6131	3.2584	3.6303	3.3304	4.4953	4.1347	4.3337	2.7436	3.6369
TAG	TAG	Mol%	5.1079	10.9585	5.0689	13.1692	12.6305	47.8627	12.7446	45.681	28.0232	24.9327	45.2091	43.155	45.5138	16.2917	6.176	24.0842	4.3218	9.203	13.6498	37.2667	22.0585

## Sheet: Species Concentrations
TrueMass® Complex Lipid Panel: Molecular Species Concentrations
Project Code:	WAKE-0204-18VWCLP
		Sample Name	WAKE-01208-01	WAKE-01209-01	WAKE-01210-01	WAKE-01211-01	WAKE-01212-01	WAKE-01213-01	WAKE-01214-01	WAKE-01215-01	WAKE-01216-01	WAKE-01217-01	WAKE-01218-01	WAKE-01219-01	WAKE-01220-01	WAKE-01221-01	WAKE-01222-01	WAKE-01223-01	WAKE-01224-01	WAKE-01225-01	WAKE-01226-01	WAKE-01227-01	WAKE-01228-01
		CLIENT IDENTIFIER	Sham4	Sham5	Sham6	Sham7	Sham8	CLP1	CLP2	CLP3	CLP4	CLP5	CLP6	CLP7	CLP8	DCA1	DCA2	DCA3	DCA4	DCA5	DCA6	DCA7	DCA8
		AGE	8wk	8wk	8wk	8wk	8wk	8wk	8wk	8wk	8wk	8wk	8wk	8wk	8wk	8wk	8wk	8wk	8wk	8wk	8wk	8wk	8wk
		AMOUNT EXTRACTED CLP	75	75	75	75	75	75	75	75	75	75	75	75	75	75	75	75	75	75	75	75	75
		BRADFORD CLP	13.238	9.19	11.778	9.73	9.801	8.604	12.735	9.121	8.822	9.049	8.744	8.788	9.677	9.331	10.476	11.423	11.957	10.915	8.045	8.718	7.411
		CELL LINE	Primary cells	Primary cells	Primary cells	Primary cells	Primary cells	Primary cells	Primary cells	Primary cells	Primary cells	Primary cells	Primary cells	Primary cells	Primary cells	Primary cells	Primary cells	Primary cells	Primary cells	Primary cells	Primary cells	Primary cells	Primary cells
		GENDER	M	M	M	M	M	M	M	M	M	M	M	M	M	M	M	M	M	M	M	M	M
		ORIG ORDER	4	5	6	7	8	9	10	11	12	13	14	15	16	17	18	19	20	21	22	23	24
		SPL AMNT	150-200 ul cell pellet	150-200 ul cell pellet	150-200 ul cell pellet	150-200 ul cell pellet	150-200 ul cell pellet	150-200 ul cell pellet	150-200 ul cell pellet	150-200 ul cell pellet	150-200 ul cell pellet	150-200 ul cell pellet	150-200 ul cell pellet	150-200 ul cell pellet	150-200 ul cell pellet	150-200 ul cell pellet	150-200 ul cell pellet	150-200 ul cell pellet	150-200 ul cell pellet	150-200 ul cell pellet	150-200 ul cell pellet	150-200 ul cell pellet	150-200 ul cell pellet
		SPL TYPE	cells	cells	cells	cells	cells	cells	cells	cells	cells	cells	cells	cells	cells	cells	cells	cells	cells	cells	cells	cells	cells
		SUBJ ID	C57/BL6 mouse	C57/BL6 mouse	C57/BL6 mouse	C57/BL6 mouse	C57/BL6 mouse	C57/BL6 mouse	C57/BL6 mouse	C57/BL6 mouse	C57/BL6 mouse	C57/BL6 mouse	C57/BL6 mouse	C57/BL6 mouse	C57/BL6 mouse	C57/BL6 mouse	C57/BL6 mouse	C57/BL6 mouse	C57/BL6 mouse	C57/BL6 mouse	C57/BL6 mouse	C57/BL6 mouse	C57/BL6 mouse
		TIME POINT	30 hr	30 hr	30 hr	30 hr	30 hr	30 hr	30 hr	30 hr	30 hr	30 hr	30 hr	30 hr	30 hr	30 hr	30 hr	30 hr	30 hr	30 hr	30 hr	30 hr	30 hr
		TREATMENT	None	None	None	None	None	CLP/PBS	CLP/PBS	CLP/PBS	CLP/PBS	CLP/PBS	CLP/PBS	CLP/PBS	CLP/PBS	CLP/DCA	CLP/DCA	CLP/DCA	CLP/DCA	CLP/DCA	CLP/DCA	CLP/DCA	CLP/DCA
		TX	Sham	Sham	Sham	Sham	Sham	CLP/PBS	CLP/PBS	CLP/PBS	CLP/PBS	CLP/PBS	CLP/PBS	CLP/PBS	CLP/PBS	CLP/DCA	CLP/DCA	CLP/DCA	CLP/DCA	CLP/DCA	CLP/DCA	CLP/DCA	CLP/DCA
		GROUP NAME	11.8.18 30hr sham mouse hepatocytes	11.8.18 30hr sham mouse hepatocytes	9.13.18 30hr sham mouse hepatocytes	10.9.18 30hr sham mouse hepayocytes	10.9.18 30hr sham mouse hepayocytes	11.8.18 30hr CLP mouse hepatocytes	9.20.18 30hr CLP mouse hepatocytes	10.11.18 30hr CLP mouse hepatocytes	9.25.18 30hr CLP mouse hepatocytes	10.11.18 30hr CLP mouse hepatocytes	9.27.18 30hr CLP mouse hepatocytes	10.4.18 30hr CLP mouse hepatocytes	10.9.18 30hr CLP mouse hepatocytes	9.18.18 30hr CLP+DCA mouse hepatocytes	9.18.18 30hr CLP+DCA mouse hepatocytes	9.20.18 30hr CLP+DCA mouse hepatocytes	9.25.18 30hr CLP+DCA mouse hepatocytes	9.27.18 30hr CLP+DCA mouse hepatocytes	9.27.18 30hr CLP+DCA mouse hepatocytes	10.4.18 30hr CLP+DCA mouse hepatocytes	10.4.18 30hr CLP+DCA mouse hepatocytes
Class	Name	Group Units	1	1	1	1	1	2	2	2	2	2	2	2	2	3	3	3	3	3	3	3	3
CE	CE(12:0)	uM		0.0013		0.0009					0.0012					0.0014	0.001				0.0017	0.0016
CE	CE(14:0)	uM	0.0087	0.0152	0.0052	0.0119	0.011	0.0374	0.0068	0.0251	0.0082	0.0148	0.0121	0.0335	0.0436	0.0227	0.0091	0.0237	0.0106	0.0156	0.0273	0.0316	0.0277
CE	CE(14:1)	uM	0.0014	0.0017	0.001	0.0017	0.0014	0.0065	0.0015	0.0046	0.0022	0.0033	0.0024	0.0055	0.0069	0.0051	0.0015	0.004	0.0014	0.0023	0.0038	0.0049	0.004
CE	CE(15:0)	uM	0.0064	0.0097	0.0037	0.0072	0.0066	0.0159	0.0052	0.0097	0.0059	0.0084	0.009	0.0152	0.0188	0.0129	0.0057	0.0108	0.0069	0.0098	0.0161	0.0129	0.0145
CE	CE(16:0)	uM	0.2835	0.7318	0.2899	0.5452	0.5254	1.8026	0.2191	1.0652	0.1341	0.2923	0.3104	1.8813	1.9124	1.0815	0.3725	1.2464	0.4268	0.8348	1.6311	1.5807	1.6243
CE	CE(16:1)	uM	0.2357	0.5876	0.1745	0.4256	0.4069	1.2491	0.0937	0.8322	0.0589	0.3147	0.1835	1.4652	1.4956	0.6287	0.2364	0.8389	0.2902	0.493	0.896	1.5367	1.0357
CE	CE(17:0)	uM	0.0203	0.0461	0.0224	0.0335	0.0319	0.0857	0.0128	0.0423	0.0079	0.0171	0.0172	0.0812	0.0773	0.0548	0.0269	0.0641	0.0301	0.041	0.0858	0.0727	0.0765
CE	CE(18:0)	uM	0.0934	0.2256	0.1022	0.1515	0.1516	0.4551	0.0626	0.2018	0.0294	0.0646	0.0654	0.4107	0.3853	0.3217	0.1255	0.2807	0.1455	0.2373	0.4622	0.3618	0.3867
CE	CE(18:1)	uM	1.2609	3.4086	1.4486	2.4468	2.3254	6.923	0.7214	3.1572	0.2679	1.1113	0.829	6.2378	6.575	5.0017	1.8007	4.3976	2.1231	3.8564	7.0434	6.7927	6.5711
CE	CE(18:2)	uM	1.0019	2.4391	1.2214	1.9373	1.907	5.1691	0.9644	2.8691	0.5545	0.977	0.9995	4.7957	5.3063	3.9475	1.3508	3.8271	1.5248	2.9901	5.9858	5.1435	5.6906
CE	CE(18:3)	uM	0.0698	0.1571	0.0671	0.1182	0.1145	0.3184	0.0312	0.2167	0.0285	0.0551	0.0571	0.3531	0.4192	0.1714	0.0743	0.2483	0.0739	0.1662	0.3334	0.34	0.3474
CE	CE(18:4)	uM	0.0031	0.0043	0.0026	0.0032	0.0029	0.003	0.001	0.0036	0.0012	0.0012	0.0021	0.0044	0.0047	0.0033	0.0025	0.0046	0.0027	0.0038	0.0057	0.0051	0.0053
CE	CE(20:0)	uM	0.0085	0.0132	0.0105	0.0099	0.0098	0.0215	0.0061	0.0108	0.0075	0.0091	0.0084	0.0214	0.0166	0.0276	0.0104	0.0193	0.0127	0.0184	0.0442	0.0203	0.0299
CE	CE(20:1)	uM	0.014	0.0217	0.0145	0.0193	0.0194	0.0348	0.0137	0.0262	0.0185	0.0206	0.0202	0.0306	0.0346	0.0296	0.0174	0.0284	0.0191	0.0283	0.0431	0.0393	0.0392
CE	CE(20:2)	uM	0.0059	0.0111	0.0074	0.0098	0.0094	0.0255	0.0067	0.0115	0.0118	0.0109	0.016	0.0172	0.0142	0.0134	0.007	0.0118	0.0098	0.0178	0.0233	0.0166	0.0208
CE	CE(20:3)	uM	0.0142	0.0189	0.0094	0.018	0.0169	0.0535	0.0138	0.0238	0.02	0.0245	0.0304	0.0428	0.0327	0.0249	0.0111	0.0212	0.0121	0.0214	0.03	0.0348	0.0306
CE	CE(20:4)	uM	0.106	0.1376	0.0567	0.132	0.1251	0.3749	0.1204	0.185	0.1141	0.1316	0.1441	0.289	0.2712	0.1763	0.0657	0.1683	0.0846	0.1431	0.2072	0.243	0.2151
CE	CE(20:5)	uM	0.0268	0.0253	0.0146	0.022	0.0215	0.0498	0.0224	0.0402	0.0174	0.0157	0.0242	0.044	0.055	0.0353	0.0162	0.0398	0.0178	0.0268	0.0474	0.0445	0.0445
CE	CE(22:0)	uM	0.0026	0.0032	0.0024	0.002	0.0025	0.005	0.0021	0.0045	0.0025	0.0037	0.0039	0.0043	0.0055	0.0059	0.0019	0.0045	0.0033	0.0043	0.0066	0.0068	0.0042
CE	CE(22:1)	uM	0.0057	0.0077	0.0051	0.0057	0.0063	0.0095	0.0046	0.0078	0.0075	0.0078	0.0084	0.0108	0.0109	0.0103	0.0053	0.0069	0.0061	0.0108	0.0129	0.0102	0.0108
CE	CE(22:2)	uM	0.0048	0.0075	0.0053	0.0074	0.006	0.0079	0.0062	0.0075	0.0098	0.0087	0.0082	0.0092	0.0077	0.0067	0.0046	0.008	0.0055	0.0097	0.0139	0.0084	0.0113
CE	CE(22:4)	uM	0.0009	0.0015	0.0007	0.0016	0.0013	0.017	0.0032	0.0073	0.0099	0.0072	0.0098	0.0076	0.0033	0.0027	0.001	0.0019	0.0009	0.0019	0.0032	0.0035	0.0027
CE	CE(22:5)	uM	0.0079	0.0118	0.0057	0.0119	0.0105	0.0484	0.0141	0.0311	0.0202	0.0143	0.0184	0.0374	0.0377	0.0258	0.0081	0.0264	0.0079	0.0179	0.0284	0.0358	0.028
CE	CE(22:6)	uM	0.1248	0.2072	0.0868	0.1877	0.1704	0.6428	0.2168	0.4234	0.1776	0.188	0.2238	0.5291	0.5176	0.4346	0.1078	0.4095	0.1349	0.3076	0.4238	0.6038	0.4487
CE	CE(24:0)	uM	0.0016	0.0022	0.0018	0.002	0.002	0.0051	0.0023	0.0044	0.0024	0.0029	0.004	0.0068	0.0058	0.0042	0.0018	0.003	0.0018	0.0027	0.0048	0.0052	0.0038
CE	CE(24:1)	uM	0.0019	0.0026	0.0014	0.0023	0.0024	0.0137	0.0027	0.007	0.0033	0.0043	0.0068	0.006	0.0063	0.0045	0.0025	0.003	0.0026	0.0027	0.005	0.0041	0.0042
CER	CER(14:0)	uM	0.0021	0.0024	0.0017	0.0025	0.0027	0.0036	0.0023	0.0037	0.0027	0.0024	0.0035	0.0029	0.0039	0.0023	0.0022	0.003	0.0022	0.0022	0.0026	0.0024	0.0027
CER	CER(16:0)	uM	0.0752	0.06	0.0547	0.0625	0.0627	0.1383	0.1258	0.1196	0.0816	0.0522	0.0992	0.1203	0.1885	0.101	0.0731	0.1064	0.0806	0.0835	0.0716	0.0841	0.074
CER	CER(18:0)	uM	0.0061	0.0097	0.006	0.0094	0.0088	0.0338	0.0197	0.0335	0.0171	0.0049	0.0309	0.0198	0.0274	0.0144	0.0085	0.0149	0.0072	0.0089	0.0092	0.0078	0.0094
CER	CER(18:1)	uM	0.0006	0.0006	0.0004	0.0005	0.0005	0.0008	0.0009	0.001	0.0012	0.0009	0.0012	0.0008	0.0008	0.0005	0.0003	0.0007	0.0004	0.0008		0.0007	0.0006
CER	CER(20:0)	uM	0.0174	0.0272	0.0206	0.0244	0.0236	0.0563	0.0403	0.0497	0.0391	0.0174	0.0555	0.0467	0.041	0.036	0.0264	0.0305	0.0181	0.0232	0.0237	0.0208	0.024
CER	CER(20:1)	uM	0.0005	0.0008	0.0006	0.0006	0.0007	0.0016	0.0012	0.0018	0.0017	0.0011	0.0022	0.0013	0.0018	0.0008	0.0006	0.0012	0.0006	0.0007	0.0008	0.001	0.001
CER	CER(22:0)	uM	0.4152	0.3159	0.3026	0.2984	0.2956	0.4911	0.4975	0.334	0.3422	0.1904	0.3113	0.4647	0.3706	0.4649	0.4179	0.2722	0.2741	0.3239	0.2678	0.2918	0.278
CER	CER(22:1)	uM	0.0288	0.0273	0.0226	0.0299	0.0281	0.042	0.0394	0.0466	0.029	0.0293	0.0398	0.0415	0.0374	0.0343	0.0336	0.0282	0.0262	0.0231	0.0215	0.0264	0.0249
CER	CER(24:0)	uM	0.6297	0.3193	0.3246	0.3183	0.3134	0.5045	0.5475	0.3192	0.3197	0.2086	0.2696	0.4796	0.3723	0.4841	0.4597	0.269	0.3772	0.4103	0.3408	0.3504	0.328
CER	CER(24:1)	uM	0.5286	0.3648	0.3548	0.4351	0.4259	0.5543	0.5495	0.3808	0.2422	0.2296	0.2945	0.4817	0.4595	0.4366	0.5272	0.38	0.4166	0.3891	0.3146	0.361	0.347
CER	CER(26:0)	uM	0.0014	0.0008	0.0007	0.001	0.0009	0.0015	0.0012	0.0008	0.0009	0.0008	0.0009	0.0012	0.0014	0.0007	0.001	0.001	0.0007	0.001	0.0012	0.0009	0.0009
CER	CER(26:1)	uM	0.0013	0.0011	0.0007	0.0011	0.001	0.0014	0.0015	0.0018	0.0011	0.0007	0.0009	0.0015	0.0013	0.001	0.0011	0.0012	0.001	0.0009	0.001	0.0009	0.0011
DAG	DAG(12:0/16:0)	uM		0.0023	0.002	0.002				0.0053	0.004	0.0023	0.0042	0.0042		0.0026		0.0023				0.0039	0.0017
DAG	DAG(12:0/18:0)	uM		0.0033			0.0032											0.0036	0.0021
DAG	DAG(12:0/18:1)	uM	0.0024	0.0036	0.0021	0.003	0.0031	0.0086	0.0034	0.0071	0.0142	0.0083	0.0103	0.0079	0.0074	0.0032	0.0027	0.0031	0.003	0.0027	0.0038	0.0056	0.004
DAG	DAG(12:0/18:2)	uM	0.0035	0.0036	0.0029	0.0057	0.0048	0.0138	0.0054	0.0151	0.0365	0.0166	0.0345	0.0203	0.0169	0.0088	0.0032	0.0057	0.0028	0.0034	0.0067	0.0099	0.0075
DAG	DAG(14:0/14:0)	uM	0.0007	0.0011	0.001	0.0011		0.0034		0.0025	0.0019	0.0019	0.0028		0.0021	0.0015	0.0013	0.0017	0.0007		0.001	0.0016	0.0013
DAG	DAG(14:0/16:0)	uM	0.0105	0.0109	0.006	0.0083	0.0085	0.0256	0.0102	0.0241	0.0246	0.0269	0.0261	0.0357	0.0234	0.0123	0.0072	0.0121	0.005	0.0083	0.0079	0.0155	0.0111
DAG	DAG(14:0/16:1)	uM	0.0021	0.002	0.001	0.002	0.0018	0.0044	0.002	0.0037	0.0059	0.0083	0.0078	0.0054	0.004	0.004	0.0015	0.0018		0.0013	0.0017	0.0034	0.0026
DAG	DAG(14:0/18:1)	uM	0.0099	0.0098	0.0058	0.0082	0.0085	0.0329	0.0086	0.0227	0.0474	0.0421	0.0475	0.0353	0.026	0.0096	0.0051	0.0103	0.0052	0.0085	0.0076	0.0215	0.014
DAG	DAG(14:0/18:2)	uM	0.0186	0.02	0.0146	0.025	0.0238	0.1079	0.033	0.0985	0.1838	0.1567	0.2012	0.1405	0.0909	0.023	0.0173	0.0437	0.0124	0.0201	0.0238	0.0667	0.0393
DAG	DAG(14:0/18:3)	uM	0.0017		0.0012	0.0021	0.0014	0.004		0.0045	0.0069	0.0034	0.0066	0.0036	0.0052		0.0011	0.0019		0.0013		0.0026
DAG	DAG(14:0/20:0)	uM	0.003			0.0034		0.0073		0.0039	0.006	0.005	0.0054		0.004			0.0033	0.0028	0.0031	0.0026	0.0059	0.005
DAG	DAG(14:0/20:4)	uM	0.0013	0.0011	0.0006	0.0016	0.0011	0.0023	0.0013	0.0021	0.0019	0.0022	0.0023	0.0032	0.0024	0.0008	0.0014	0.0015	0.0011	0.0008	0.001	0.0014	0.0011
DAG	DAG(14:0/22:6)	uM	0.003	0.0037	0.002	0.0028	0.0032	0.0147	0.0057	0.0109	0.021	0.0121	0.0153	0.0133	0.0102	0.0028	0.0022	0.0048	0.0019	0.0035	0.0034	0.0073	0.0046
DAG	DAG(14:1/16:0)	uM	0.0028	0.0035	0.0025	0.0023	0.0023	0.0054	0.0039	0.0051	0.0049	0.0042	0.0039	0.0046	0.0052	0.0034	0.0026	0.0024	0.0014	0.0024	0.0033	0.0021	0.0037
DAG	DAG(14:1/18:1)	uM	0.0012	0.0016	0.0016	0.0017	0.0021	0.0037	0.0022	0.0049	0.0077	0.0059	0.0062	0.0061	0.0026	0.0018	0.0016	0.0022	0.0017	0.0019	0.0068	0.0039	0.0024
DAG	DAG(15:0/18:1)	uM	0.0057	0.0064	0.0044	0.0058	0.0056	0.0124	0.0065	0.0096	0.014	0.0154	0.0175	0.0147	0.0093	0.0059	0.0043	0.0059	0.0035	0.0046	0.0051	0.0118	0.0087
DAG	DAG(15:0/18:2)	uM	0.0166	0.0197	0.0156	0.0205	0.018	0.0486	0.0214	0.0412	0.0616	0.0574	0.0655	0.0601	0.0465	0.0176	0.0163	0.0236	0.0112	0.0122	0.0172	0.0375	0.0329
DAG	DAG(16:0/16:0)	uM	0.0534	0.0712	0.0409	0.0629	0.0634	0.1553	0.0649	0.1319	0.1338	0.1108	0.1494	0.1817	0.1337	0.064	0.0429	0.0831	0.0317	0.0558	0.0547	0.129	0.0937
DAG	DAG(16:0/16:1)	uM	0.0223	0.02	0.0089	0.0166	0.017	0.039	0.0091	0.0364	0.0387	0.0618	0.0508	0.0558	0.0428	0.0116	0.0105	0.0172	0.0075	0.0095	0.0092	0.0418	0.0181
DAG	DAG(16:0/18:0)	uM	0.0553	0.0837	0.0385	0.0654	0.0538	0.1236	0.0738	0.1393	0.1214	0.0915	0.102	0.1604	0.0975	0.0592	0.0393	0.0731	0.0331	0.0481	0.0385	0.0838	0.0775
DAG	DAG(16:0/18:1)	uM	0.519	0.6279	0.3609	0.5975	0.593	1.4846	0.566	1.0291	1.1128	1.3699	1.4269	1.6568	1.1986	0.4783	0.3606	0.669	0.3063	0.4727	0.4635	1.2648	0.8096
DAG	DAG(16:0/18:2)	uM	1.0461	1.5558	1.1203	1.6082	1.6424	3.7273	1.703	2.971	3.1676	3.0272	4.0935	4.2569	3.5565	1.3031	0.9637	1.9417	0.7324	1.297	1.3042	3.1054	2.2077
DAG	DAG(16:0/18:3)	uM	0.0348	0.0448	0.0321	0.0407	0.0425	0.1042	0.0252	0.0817	0.1161	0.0745	0.1164	0.1128	0.1071	0.0319	0.0237	0.0568	0.0194	0.033	0.0283	0.0975	0.058
DAG	DAG(16:0/20:3)	uM	0.0628	0.0547	0.0372	0.0575	0.0622	0.0474	0.0287	0.0331	0.0538	0.0568	0.0444	0.055	0.0404	0.0229	0.0348	0.032	0.0302	0.0432	0.0318	0.0451	0.0425
DAG	DAG(16:0/20:4)	uM	0.179	0.1778	0.1245	0.2066	0.2105	0.2109	0.1586	0.1523	0.1608	0.1896	0.1429	0.1986	0.1999	0.0974	0.109	0.1603	0.102	0.1279	0.1144	0.1589	0.1596
DAG	DAG(16:0/20:5)	uM	0.0319	0.0291	0.0243	0.0272	0.029	0.0365	0.0254	0.0381	0.0303	0.0179	0.0294	0.0425	0.0341	0.0139	0.017	0.028	0.0139	0.0198	0.022	0.0286	0.0246
DAG	DAG(16:0/22:5)	uM	0.053	0.06	0.0344	0.0577	0.06	0.1135	0.0565	0.1067	0.0884	0.0734	0.0954	0.1327	0.1067	0.0384	0.0295	0.0666	0.0234	0.0464	0.0443	0.1031	0.0775
DAG	DAG(16:0/22:6)	uM	0.2917	0.3865	0.2686	0.3688	0.3879	0.642	0.3865	0.4742	0.4446	0.3508	0.476	0.6735	0.5679	0.2618	0.22	0.3751	0.1764	0.272	0.2461	0.4403	0.4107
DAG	DAG(16:1/16:1)	uM	0.0028	0.0019	0.001	0.0019	0.0017	0.0048	0.0008	0.0051	0.0082	0.0187	0.0098	0.0061	0.0064	0.0022	0.0012	0.0017	0.0011	0.0013	0.0012	0.0047	0.002
DAG	DAG(16:1/18:0)	uM	0.0068	0.0065	0.0039	0.006	0.0057	0.0156	0.0042	0.0124	0.0142	0.0199	0.0216	0.0167	0.0126	0.005	0.0051	0.0057	0.0051	0.0051	0.0047	0.0118	0.007
DAG	DAG(16:1/18:1)	uM	0.0329	0.0438	0.0166	0.0337	0.0329	0.1158	0.0227	0.082	0.1557	0.2302	0.1824	0.1485	0.0901	0.0262	0.0189	0.035	0.0164	0.0222	0.0284	0.099	0.0432
DAG	DAG(16:1/18:2)	uM	0.0907	0.1511	0.0742	0.1397	0.1409	0.4568	0.1075	0.3988	0.7745	0.9265	0.8748	0.6607	0.459	0.1074	0.0756	0.1891	0.0541	0.0875	0.1036	0.3927	0.1977
DAG	DAG(16:1/18:3)	uM	0.0037	0.0043	0.0024	0.0044	0.0039	0.0129	0.0021	0.0137	0.0244	0.0198	0.0213	0.019	0.0125	0.0032	0.0026	0.0049	0.0021	0.0027	0.0032	0.0111	0.005
DAG	DAG(16:1/20:0)	uM	0.0054	0.0042	0.003	0.0039	0.0049	0.0091		0.0109	0.0125	0.0136	0.0094	0.0131	0.0096		0.0037	0.0041	0.0039	0.0032	0.0054	0.009	0.0045
DAG	DAG(16:1/20:2)	uM	0.0044	0.0066	0.0044	0.0073	0.0062	0.0218	0.0065	0.0143	0.0284	0.0266	0.026	0.026	0.014	0.0055	0.0036	0.0098	0.0038	0.005	0.0069	0.0173	0.0103
DAG	DAG(16:1/20:4)	uM	0.0041	0.0054	0.003	0.0059	0.0054	0.0076	0.0026	0.0058	0.0091	0.0152	0.0103	0.0085	0.0064	0.0043	0.0045	0.0047	0.0033	0.0035	0.0022	0.0058	0.0039
DAG	DAG(16:1/22:6)	uM	0.0141	0.0165	0.0082	0.015	0.0159	0.049	0.0152	0.0371	0.0788	0.0776	0.0668	0.0634	0.047	0.014	0.0087	0.0207	0.0084	0.0101	0.0114	0.0392	0.0217
DAG	DAG(18:0/18:1)	uM	0.0346	0.0493	0.0319	0.0411	0.0418	0.118	0.0433	0.0714	0.1095	0.0887	0.1136	0.1121	0.062	0.0386	0.028	0.0402	0.0256	0.0347	0.0363	0.0596	0.0455
DAG	DAG(18:0/18:2)	uM	0.3095	0.4593	0.3539	0.4214	0.4363	0.7045	0.3866	0.5871	0.6366	0.4247	0.7001	0.6968	0.5326	0.2601	0.2669	0.3577	0.2468	0.3199	0.3227	0.3658	0.3841
DAG	DAG(18:0/18:3)	uM	0.0076	0.0113	0.0096	0.0109	0.0108	0.0306	0.0093	0.0243	0.0395	0.0237	0.0335	0.0322	0.0242	0.0091	0.0073	0.0119	0.0069	0.0086	0.009	0.0213	0.0131
DAG	DAG(18:0/22:6)	uM	0.1174	0.1454	0.0998	0.13	0.1369	0.231	0.1797	0.1843	0.1827	0.1102	0.1592	0.2618	0.2202	0.1189	0.0858	0.125	0.0742	0.0949	0.0924	0.1194	0.1274
DAG	DAG(18:1/18:1)	uM	0.1116	0.209	0.0838	0.1579	0.1533	0.6533	0.155	0.3751	0.6681	0.6734	0.6664	0.6841	0.352	0.1475	0.0816	0.1715	0.0718	0.1168	0.1335	0.3925	0.2311
DAG	DAG(18:1/18:2)	uM	0.6466	1.2685	0.7032	1.1932	1.2454	4.9035	1.312	3.3437	5.224	4.5465	5.5987	5.7817	3.3778	1.1761	0.6312	1.6788	0.5279	0.9684	1.2768	3.0848	2.0522
DAG	DAG(18:1/20:1)	uM	0.014	0.0187	0.0114	0.0148	0.0153	0.0492	0.0215	0.0376	0.0686	0.1178	0.0575	0.0683	0.03	0.0178	0.0112	0.0182	0.0094	0.0129	0.0176	0.0402	0.0252
DAG	DAG(18:1/20:2)	uM	0.0169	0.0197	0.0143	0.0174	0.0157	0.0451	0.021	0.0382	0.0864	0.14	0.067	0.0702	0.0298	0.0212	0.013	0.0192	0.0127	0.0189	0.0212	0.0385	0.0274
DAG	DAG(18:1/20:3)	uM	0.0316	0.0371	0.0225	0.0351	0.0357	0.07	0.0255	0.0451	0.1124	0.1486	0.078	0.0859	0.0471	0.0254	0.0193	0.0269	0.0193	0.0284	0.0256	0.053	0.0384
DAG	DAG(18:1/20:4)	uM	0.0506	0.0661	0.037	0.0597	0.0594	0.1021	0.0559	0.0688	0.1303	0.1774	0.1004	0.1045	0.0797	0.0401	0.0324	0.0505	0.0362	0.0389	0.0389	0.0701	0.0563
DAG	DAG(18:1/20:5)	uM	0.0143	0.0175	0.0116	0.0181	0.0219	0.0547	0.0241	0.0508	0.0519	0.0415	0.0505	0.0664	0.0634	0.0138	0.0099	0.0273	0.0083	0.0123	0.016	0.0433	0.0274
DAG	DAG(18:1/22:4)	uM	0.0027	0.0027	0.0016	0.0037	0.0034	0.0127	0.004	0.0069	0.0138	0.0218	0.0102	0.0135	0.0093	0.0034	0.0016	0.0039	0.0019	0.0019	0.0036	0.007	0.0051
DAG	DAG(18:1/22:5)	uM	0.0268	0.0352	0.0179	0.0352	0.0395	0.1096	0.0536	0.1022	0.1636	0.1474	0.122	0.1576	0.0962	0.0404	0.0183	0.0558	0.017	0.0301	0.0431	0.1002	0.0687
DAG	DAG(18:1/22:6)	uM	0.1289	0.1719	0.1057	0.1746	0.1841	0.4508	0.2801	0.3405	0.7358	0.661	0.544	0.5866	0.3945	0.2141	0.0851	0.2634	0.0964	0.1484	0.1922	0.4013	0.3035
DAG	DAG(18:2/18:3)	uM	0.0299	0.05	0.0342	0.0606	0.0558	0.2087	0.0405	0.1576	0.3027	0.1582	0.2758	0.235	0.197	0.0469	0.0248	0.0851	0.0183	0.0445	0.0497	0.1595	0.0951
DAG	DAG(18:2/20:3)	uM	0.0183	0.0282	0.0195	0.0259	0.028	0.067	0.0283	0.0515	0.135	0.1341	0.1039	0.0877	0.0492	0.0227	0.0166	0.0258	0.0144	0.0263	0.0258	0.0533	0.0391
DAG	DAG(18:2/20:4)	uM	0.0284	0.0457	0.0349	0.0441	0.0466	0.1167	0.068	0.0791	0.1404	0.1587	0.1251	0.1218	0.1074	0.0484	0.0277	0.0628	0.0244	0.0313	0.0394	0.0719	0.0585
DAG	DAG(18:2/20:5)	uM	0.0127	0.02	0.0129	0.0217	0.0223	0.0804	0.0335	0.0801	0.0901	0.0538	0.081	0.1092	0.1019	0.0198	0.0102	0.0454	0.0061	0.0145	0.0197	0.0651	0.0368
DAG	DAG(18:2/22:4)	uM	0.0025	0.0048	0.0028	0.0048	0.0054	0.0197	0.0068	0.0147	0.0236	0.033	0.0191	0.0234	0.0156	0.0062	0.0024	0.0079	0.0028	0.0041	0.0061	0.0129	0.0099
DAG	DAG(18:2/22:5)	uM	0.0248	0.039	0.0249	0.0462	0.047	0.1632	0.0876	0.1628	0.2672	0.1971	0.2071	0.2112	0.1572	0.056	0.0209	0.099	0.0228	0.0456	0.0664	0.1455	0.1155
DAG	DAG(18:2/22:6)	uM	0.0867	0.1586	0.1157	0.1753	0.1913	0.531	0.3386	0.4343	1.0509	0.6974	0.7234	0.6925	0.5279	0.2525	0.0789	0.3661	0.0939	0.1622	0.2568	0.5135	0.3943
DCER	DCER(14:0)	uM		0.0021			0.0017			0.003		0.003	0.0033		0.0039	0.0025	0.0023		0.0016		0.0017	0.0029	0.0029
DCER	DCER(16:0)	uM	0.0128	0.0108	0.0092	0.0096	0.0105	0.0308	0.0233	0.0407	0.0207	0.0102	0.0275	0.0284	0.0364	0.017	0.0135	0.0187	0.0152	0.0127	0.0108	0.017	0.0135
DCER	DCER(18:0)	uM	0.0022	0.003	0.002	0.0028	0.0026	0.0101	0.0061	0.0159	0.0075		0.0102	0.0073	0.0087	0.0045	0.0019	0.0032	0.0024	0.003	0.0031	0.0024	0.0034
DCER	DCER(20:0)	uM	0.0048	0.0073	0.0064	0.0068	0.0071	0.0149	0.0092	0.0181	0.0133	0.0064	0.0231	0.0161	0.013	0.0108	0.0061	0.007	0.0049	0.0085	0.007	0.0064	0.0077
DCER	DCER(20:1)	uM
DCER	DCER(22:0)	uM	0.0548	0.0451	0.0431	0.0365	0.0392	0.0844	0.0706	0.0743	0.055	0.0273	0.0686	0.0912	0.057	0.0695	0.0558	0.037	0.0403	0.044	0.0364	0.0427	0.0418
DCER	DCER(22:1)	uM	0.0052	0.006	0.005	0.0052	0.0061	0.0077	0.0059	0.0079	0.0091	0.0065	0.0107	0.0081	0.0084	0.0087	0.005	0.0037	0.0044	0.0054	0.0062	0.0057	0.0075
DCER	DCER(22:2)	uM	0.0044	0.0036	0.0035	0.0038	0.0042	0.0064	0.0047	0.0039	0.0057	0.0037	0.0044	0.0054	0.0061	0.0036	0.0049	0.0033	0.0034	0.0039	0.0038	0.0042	0.0044
DCER	DCER(24:0)	uM	0.0644	0.0364	0.039	0.0341	0.035	0.0592	0.06	0.0473	0.0412	0.0231	0.0365	0.0642	0.0441	0.0555	0.0518	0.0274	0.0438	0.0423	0.0341	0.042	0.0347
DCER	DCER(24:1)	uM	0.0729	0.066	0.064	0.0693	0.0667	0.0864	0.0869	0.0791	0.0628	0.0529	0.076	0.0863	0.0764	0.0823	0.0816	0.0626	0.069	0.0651	0.0637	0.0586	0.0753
DCER	DCER(26:0)	uM	0.0049	0.0063	0.0042	0.0038	0.0029	0.0108	0.005	0.0042	0.0068	0.0046	0.0067	0.0053		0.0061	0.0101	0.0041	0.0042	0.0046	0.0069	0.0136	0.0049
DCER	DCER(26:1)	uM	0.0031	0.0045	0.0032	0.0033	0.0039	0.0045	0.0036	0.0045	0.0039	0.0037	0.0033	0.0055		0.0053	0.0035	0.0028	0.0035	0.0033	0.004	0.0037	0.0049
FFA	FFA(12:0)	uM	0.2537	0.4888	0.2681	0.3457	0.3319	0.5115	0.301	0.3552	0.666	0.3618	0.467	0.3574	0.3238	0.4502	0.2718	0.2669	0.2481	0.3275	0.3154	0.3343	0.4192
FFA	FFA(14:0)	uM	0.6793	1.1167	0.6652	0.8479	0.8288	1.3366	0.7282	0.9817	1.7336	1.1497	1.3484	1.0459	0.9343	1.3449	0.6955	0.7008	0.6234	0.8251	0.7902	0.8477	1.0236
FFA	FFA(14:1)	uM	0.1505	0.2722	0.162	0.1915	0.1945	0.2873	0.1743	0.241	0.3869	0.241	0.3038	0.2254	0.2097	0.2668	0.1678	0.1667	0.1346	0.1996	0.204	0.2035	0.2387
FFA	FFA(15:0)	uM	0.421	0.7367	0.4172	0.4994	0.5171	0.814	0.498	0.5335	0.9617	0.6611	0.7555	0.6131	0.5577	0.8011	0.4079	0.3961	0.3522	0.5202	0.4737	0.4979	0.6417
FFA	FFA(16:0)	uM	10.808	15.2579	9.8274	12.3391	12.2864	20.4003	11.2063	15.0837	19.9898	15.8099	18.1751	16.7927	15.5985	16.8164	10.9155	11.3809	9.1312	12.0953	12.2055	13.4622	14.2496
FFA	FFA(16:1)	uM	0.6998	0.8518	0.4738	0.6286	0.664	1.2734	0.5274	0.9593	1.8791	2.2671	1.9378	1.5009	1.0252	0.8911	0.5044	0.5937	0.3866	0.5178	0.5293	0.8475	0.6573
FFA	FFA(17:0)	uM	0.322	0.4509	0.3193	0.3849	0.3917	0.5533	0.3503	0.4053	0.5509	0.4749	0.5136	0.4644	0.4236	0.5408	0.347	0.3255	0.2991	0.365	0.4099	0.4142	0.4508
FFA	FFA(18:0)	uM	5.6507	6.1084	5.1942	6.2151	5.9554	8.3809	5.2292	7.1611	6.6871	6.8085	6.9172	6.6783	7.2358	10.0764	6.0763	5.6148	5.3653	6.166	6.5971	6.5149	6.9907
FFA	FFA(18:1)	uM	2.7226	3.7131	2.4273	3.0299	3.2903	5.9132	2.9449	4.2513	6.2773	6.3237	6.9359	6.2843	4.4194	3.1461	2.3508	2.9393	1.9138	2.6747	3.2202	4.1504	3.5105
FFA	FFA(18:2)	uM	3.2927	5.0346	3.7828	4.3269	4.7283	8.4848	4.3003	6.3495	9.1828	7.2074	9.656	8.2709	6.8244	4.2342	3.6234	4.8812	2.5598	3.9003	4.7224	5.8082	5.3971
FFA	FFA(18:4)	uM	0.0776	0.1121	0.0834	0.098	0.1081	0.1524	0.0773	0.1196	0.1477	0.1143	0.1542	0.1289	0.1158	0.1062	0.095	0.0984	0.0717	0.0915	0.115	0.1273	0.1283
FFA	FFA(20:0)	uM	0.1849	0.2025	0.1672	0.19	0.2024	0.2766	0.1834	0.233	0.2173	0.2571	0.2412	0.2278	0.2241	0.2779	0.2052	0.1676	0.1684	0.1838	0.2297	0.2426	0.2308
FFA	FFA(20:1)	uM	0.125	0.1261	0.1035	0.1192	0.1254	0.1804	0.1249	0.148	0.2049	0.3079	0.2055	0.1912	0.1462	0.1255	0.1091	0.1051	0.0954	0.1085	0.137	0.1521	0.1423
FFA	FFA(20:2)	uM	0.1733	0.1329	0.1165	0.1279	0.1266	0.1827	0.1519	0.1404	0.2332	0.3221	0.2296	0.2163	0.1555	0.1295	0.1172	0.0969	0.1019	0.1297	0.1401	0.1456	0.1381
FFA	FFA(20:3)	uM	0.4871	0.3696	0.3077	0.3734	0.3861	0.3369	0.2491	0.2649	0.3571	0.4508	0.3773	0.3455	0.3092	0.2521	0.3383	0.2419	0.2572	0.3427	0.3254	0.2969	0.3083
FFA	FFA(20:4)	uM	2.1865	2.1707	1.7904	2.2446	2.2514	2.1459	1.8111	1.4909	1.5771	2.0765	1.781	1.8442	1.993	1.5236	1.834	1.7747	1.5401	1.8494	1.8777	1.5797	1.8768
FFA	FFA(20:5)	uM	0.7151	0.647	0.6155	0.6382	0.6559	0.7396	0.6161	0.7231	0.6639	0.6724	0.8801	0.7323	0.7449	0.5702	0.6342	0.7372	0.4474	0.545	0.6494	0.6697	0.7283
FFA	FFA(22:0)	uM	0.1086	0.1018	0.0952	0.1187	0.1194	0.1681	0.1138	0.146	0.1345	0.1608	0.1567	0.153	0.1453	0.1602	0.1206	0.1129	0.1052	0.1132	0.1527	0.157	0.1618
FFA	FFA(22:1)	uM	0.2962	0.3011	0.2998	0.3589	0.3415	0.5184	0.2637	0.5404	0.4267	0.4745	0.5745	0.4959	0.497	0.5993	0.3455	0.3799	0.3277	0.3119	0.4243	0.4768	0.4874
FFA	FFA(22:2)	uM	0.044	0.0474	0.0377	0.0475	0.046	0.0698	0.0371	0.0649	0.082	0.1021	0.0934	0.0787	0.0644	0.0646	0.0463	0.0455	0.0401	0.0433	0.0605	0.0633	0.0619
FFA	FFA(22:4)	uM	0.0754	0.0872	0.068	0.0893	0.0943	0.1615	0.0881	0.1214	0.1453	0.1888	0.1455	0.1355	0.1121	0.0958	0.0823	0.0884	0.0678	0.0841	0.1082	0.1144	0.1223
FFA	FFA(22:5)	uM	0.2843	0.3037	0.2516	0.3171	0.3452	0.5174	0.3767	0.4658	0.5409	0.5837	0.5477	0.5015	0.4629	0.3452	0.2732	0.3738	0.2166	0.3026	0.3749	0.428	0.4394
FFA	FFA(22:6)	uM	2.1781	1.7838	1.6952	1.9058	2.0648	2.6316	2.7782	2.0655	2.8098	2.7073	2.8308	2.7607	2.5812	1.7671	1.589	2.0882	1.2998	1.9593	2.0725	2.0501	2.1288
FFA	FFA(24:0)	uM	0.0577	0.0523	0.0528	0.064	0.0642	0.0733	0.0537	0.0766	0.0564	0.0834	0.0673	0.0673	0.0727	0.086	0.0651	0.0559	0.0545	0.0598	0.1424	0.0742	0.0777
FFA	FFA(24:1)	uM	0.1716	0.1598	0.1623	0.1933	0.1795	0.2318	0.1388	0.2643	0.1801	0.2081	0.2304	0.1969	0.2563	0.3806	0.2093	0.1925	0.199	0.1948	0.2457	0.2394	0.245
HCER	HCER(14:0)	uM			0.0004	0.0005	0.0005		0.0005		0.0006			0.0005	0.0006	0.0004	0.0004		0.0003	0.0004		0.0005
HCER	HCER(16:0)	uM	0.0237	0.0404	0.0214	0.0476	0.0456	0.0651	0.0594	0.0387	0.084	0.0363	0.0597	0.0454	0.0664	0.0459	0.0215	0.0555	0.0201	0.0388	0.0369	0.0327	0.044
HCER	HCER(18:0)	uM	0.0017	0.0047	0.002	0.0048	0.0048	0.0109	0.0063	0.0085	0.008	0.0025	0.0088	0.0056	0.0086	0.0035	0.0019	0.0064	0.0017	0.0047	0.0038	0.0025	0.0043
HCER	HCER(18:1)	uM		0.0005	0.0005		0.0007	0.0008	0.0006	0.0006		0.0007	0.0007	0.0009	0.001	0.0005	0.0006	0.0005	0.0005	0.0006	0.0006	0.0004
HCER	HCER(20:0)	uM	0.0101	0.0266	0.0146	0.0264	0.0262	0.0327	0.0282	0.0277	0.0216	0.0141	0.0246	0.0216	0.0314	0.015	0.0126	0.0262	0.009	0.0204	0.018	0.0121	0.0212
HCER	HCER(20:1)	uM		0.0005		0.0006	0.0006	0.0009	0.0008	0.001	0.0009	0.0007	0.0008	0.0008	0.0008	0.0005	0.0005	0.0006		0.0008	0.0006		0.0004
HCER	HCER(22:0)	uM	0.1021	0.177	0.1104	0.1806	0.1786	0.1156	0.1733	0.0932	0.115	0.1075	0.0872	0.1007	0.1119	0.0856	0.1029	0.1343	0.0615	0.1239	0.104	0.0914	0.1353
HCER	HCER(22:1)	uM	0.0044	0.0097	0.0053	0.0114	0.0114	0.0064	0.0091	0.0074	0.0067	0.0088	0.0064	0.0068	0.0075	0.0038	0.0047	0.0086	0.003	0.0057	0.0054	0.0056	0.0075
HCER	HCER(24:0)	uM	0.0556	0.0641	0.042	0.064	0.0626	0.0432	0.0748	0.0324	0.0535	0.0508	0.0383	0.0387	0.0457	0.0434	0.0471	0.0462	0.0383	0.0587	0.0467	0.0456	0.0514
HCER	HCER(24:1)	uM	0.0289	0.0515	0.0313	0.0596	0.0613	0.0293	0.0463	0.0217	0.0343	0.0395	0.0281	0.0258	0.0341	0.0281	0.0327	0.0433	0.0215	0.0357	0.0294	0.0289	0.0408
HCER	HCER(26:0)	uM	0.0003			0.0003	0.0005	0.0005	0.0004					0.0007	0.0009								0.0004
HCER	HCER(26:1)	uM			0.0002		0.0005	0.0007				0.0007		0.0006	0.0008	0.0003	0.0004				0.0005	0.0004	0.0005
LCER	LCER(14:0)	uM	0.0007		0.0004	0.0008	0.0008			0.0004			0.0005		0.0006	0.0008	0.0005		0.0006		0.0008	0.0005	0.0006
LCER	LCER(16:0)	uM	0.0028	0.0025	0.002	0.0024	0.0028	0.003	0.0022	0.0019	0.0032	0.0029	0.0023	0.0028	0.0022	0.0023	0.0016	0.0016	0.0019	0.0026	0.0025	0.0021	0.0021
LCER	LCER(18:0)	uM	0.0017	0.0019	0.0015	0.0018	0.0019	0.0019	0.0017	0.0021	0.0018	0.0018	0.0015	0.0021	0.0015	0.0018	0.0019	0.0015	0.0015	0.0018	0.0024	0.0018	0.0022
LCER	LCER(18:1)	uM	0.0075	0.011	0.0094	0.0083	0.0101	0.0065	0.0059	0.0057	0.0068	0.0076	0.0061	0.0059	0.0051	0.0086	0.0081	0.006	0.0083	0.0087	0.0102	0.0078	0.0095
LCER	LCER(20:0)	uM	0.0011	0.0011	0.0011	0.0013	0.0015	0.0018	0.0016	0.0016	0.0013	0.0017	0.0013	0.0019	0.0016	0.0014	0.0016	0.0013	0.0011	0.0016	0.0016	0.0015	0.001
LCER	LCER(20:1)	uM	0.001	0.0011	0.0007	0.0009	0.0013	0.0008	0.0011	0.001	0.001	0.0009	0.0009	0.0011	0.0007	0.001	0.0008	0.0008	0.0007	0.001	0.0013	0.001	0.001
LCER	LCER(22:0)	uM	0.0067	0.0089	0.0065	0.0078	0.0079	0.0103	0.0124	0.0101	0.0135	0.0103	0.0097	0.0098	0.0102	0.0101	0.0065	0.0085	0.0045	0.008	0.0115	0.0103	0.0112
LCER	LCER(22:1)	uM	0.0008	0.0011	0.0009	0.0015	0.0013	0.0021	0.0016	0.0018	0.0021	0.0016	0.002	0.0016	0.0018	0.0014	0.0013	0.0016	0.0008	0.0014	0.0019	0.0021	0.002
LCER	LCER(24:0)	uM	0.0032	0.004	0.0026	0.0024	0.0031	0.002	0.0044	0.0019	0.0027	0.0029	0.0017	0.0024	0.0016	0.0023	0.0031	0.0016	0.0023	0.0027	0.0028	0.0019	0.0023
LCER	LCER(24:1)	uM	0.0021	0.0029	0.0028	0.0031	0.0033	0.0017	0.0031	0.0014	0.0019	0.0026	0.0016	0.0021	0.0016	0.0016	0.0029	0.0017	0.0017	0.0024	0.0025	0.0016	0.002
LCER	LCER(26:0)	uM					0.0005							0.0004							0.0006
LCER	LCER(26:1)	uM
LPC	LPC(14:0)	uM
LPC	LPC(15:0)	uM
LPC	LPC(16:0)	uM	0.4928	0.468	0.3455	0.4924	0.4587	0.3362	0.3101	0.3108	0.1838	0.2385	0.214	0.3471	0.3403	0.3284	0.4051	0.4125	0.4606	0.5163	0.4344	0.4247	0.4609
LPC	LPC(16:1)	uM
LPC	LPC(17:0)	uM
LPC	LPC(18:0)	uM	0.3929	0.5255	0.3783	0.4698	0.4174	0.246	0.2642	0.263	0.1799	0.1624	0.1681	0.2762	0.3035	0.2557	0.3844	0.3877	0.4109	0.5385	0.4652	0.3705	0.4957
LPC	LPC(18:1)	uM	0.0569	0.0659	0.0321	0.0479	0.0681	0.0316	0.0322	0.0333	0.035	0.0346	0.0275	0.0349	0.0401	0.0358	0.0418	0.0314	0.0541	0.0474	0.0419	0.0442	0.044
LPC	LPC(18:2)	uM	0.0505	0.0715	0.0379	0.0479	0.0554	0.0307	0.0322	0.0416	0.04	0.04	0.0426	0.0385	0.0468	0.0477	0.0459	0.0433	0.0506	0.0678	0.0471	0.0401	0.0554
LPC	LPC(18:3)	uM
LPC	LPC(20:0)	uM	0.0379	0.0492	0.0318	0.0479	0.0446	0.0267	0.0255	0.0262	0.0543	0.0373	0.0369	0.0376	0.0304	0.044	0.0276	0.032	0.0427	0.0409	0.0475	0.0377	0.0423
LPC	LPC(20:1)	uM
LPC	LPC(20:2)	uM
LPC	LPC(20:3)	uM	0.0177																0.0115	0.0136
LPC	LPC(20:4)	uM	0.0173	0.0258	0.0146	0.0264	0.0181		0.0123			0.019			0.0122		0.013	0.0201	0.0167	0.017	0.0164	0.0121	0.0244
LPC	LPC(20:5)	uM
LPC	LPC(22:4)	uM
LPC	LPC(22:5)	uM
LPC	LPC(22:6)	uM	0.023	0.0358	0.0192	0.0248	0.0333		0.0245	0.0202	0.024	0.0217	0.016	0.0149	0.027		0.0168	0.0174	0.0209	0.0222	0.026	0.0189	0.0209
LPE	LPE(16:0)	uM	0.1225	0.1244	0.1055	0.108	0.1212	0.1278	0.1135	0.1316	0.0737	0.0662	0.1038	0.1589	0.1313	0.1304	0.1151	0.1304	0.1189	0.1391	0.1429	0.1329	0.1294
LPE	LPE(16:1)	uM
LPE	LPE(17:0)	uM	0.0022	0.0024	0.0025		0.0024		0.0027					0.0021			0.0023	0.0024	0.002	0.003
LPE	LPE(18:0)	uM	0.2088	0.2476	0.2144	0.2038	0.2102	0.1885	0.1836	0.1997	0.1208	0.0928	0.1314	0.2391	0.216	0.1936	0.2322	0.203	0.2033	0.257	0.2255	0.1999	0.2045
LPE	LPE(18:1)	uM	0.0171	0.0199	0.0179	0.0169	0.0179	0.0103	0.0104	0.0126	0.0116	0.0145	0.014	0.0148	0.0154	0.0126	0.017	0.0153	0.0161	0.0189	0.0167	0.0158	0.0166
LPE	LPE(18:2)	uM	0.0068	0.0075	0.0048	0.0069	0.0058	0.0045	0.0062	0.0072	0.0081	0.008	0.0087	0.0079	0.0062	0.0039	0.0058	0.0044	0.0044	0.0057	0.0054	0.0051	0.005
LPE	LPE(20:0)	uM	0.0043	0.0049	0.0051	0.0038	0.0042	0.0035	0.0032	0.0018	0.0037	0.0035	0.003	0.0041	0.0036	0.0052	0.0047	0.0027	0.0035	0.0048	0.0035	0.0036
LPE	LPE(20:1)	uM	0.0038	0.0048	0.0038	0.0032	0.0034		0.0029	0.002		0.0043		0.0036	0.0021	0.0029	0.0034	0.0029	0.0043	0.003	0.0025	0.0031	0.0029
LPE	LPE(20:2)	uM	0.0021												0.0019				0.001
LPE	LPE(20:3)	uM	0.0032	0.0047	0.0024	0.0042	0.0029		0.0026	0.0017	0.0038	0.0033					0.0024	0.0019	0.0017	0.0039	0.0022	0.0025
LPE	LPE(20:4)	uM	0.0198	0.0243	0.013	0.0228	0.022	0.0116	0.0153	0.0132	0.0143	0.0202	0.0136	0.0138	0.0173	0.0135	0.0136	0.0146	0.0155	0.0191	0.0186	0.0161	0.0172
LPE	LPE(22:4)	uM
LPE	LPE(22:5)	uM	0.0035		0.0022		0.0021	0.0031	0.0021	0.0024	0.0038	0.0035	0.0046	0.0035	0.0036	0.0017	0.002	0.0022	0.002	0.0022		0.0025	0.003
LPE	LPE(22:6)	uM	0.0312	0.0252	0.0158	0.0212	0.0222	0.0225	0.0234	0.0182	0.0237	0.018	0.0199	0.0262	0.0297	0.019	0.0183	0.0163	0.0127	0.0203	0.0133	0.0156	0.0139
MAG	MAG(12:0)	uM	0.0046	0.0064	0.0053	0.005	0.0044	0.0061	0.0048	0.006	0.0058	0.0067	0.0086	0.0063	0.0052	0.0058	0.0057	0.0051	0.0052	0.0055	0.0069	0.0057	0.0073
MAG	MAG(14:0)	uM	0.0198	0.0429	0.0119	0.0253	0.0166	0.0258	0.0265	0.0621	0.0392	0.0231	0.0224	0.0497	0.0287	0.0226	0.0164	0.0246	0.0147	0.0236	0.0119	0.019	0.0235
MAG	MAG(14:1)	uM	0.0032	0.0037	0.0024	0.0035	0.0028	0.0036	0.0032	0.0028	0.0027	0.0044	0.0036	0.0042	0.0034	0.0042	0.0029	0.0022	0.0023	0.0044	0.0032	0.0021	0.0037
MAG	MAG(15:0)	uM	0.1244	0.1838	0.1278	0.1402	0.1327	0.1637	0.1471	0.1488	0.1748	0.143	0.1564	0.1357	0.1246	0.1842	0.149	0.1142	0.1081	0.1372	0.1425	0.1191	0.1889
MAG	MAG(16:0)	uM	0.1224	0.3211	0.0699	0.1842	0.1239	0.2454	0.2408	0.5432	0.3762	0.1607	0.1585	0.4321	0.2333	0.1767	0.1055	0.1842	0.0985	0.1559	0.0635	0.1287	0.2164
MAG	MAG(16:1)	uM	0.0144	0.0206	0.0123	0.0125	0.0153	0.0189	0.0156	0.0166	0.0259	0.0196	0.0261	0.0206	0.0137	0.0253	0.0177	0.0153	0.0127	0.0135	0.0161	0.0147	0.0181
MAG	MAG(17:0)	uM	0.0113	0.0264	0.0062	0.0131	0.0108	0.0206	0.0215	0.0499	0.032	0.0124	0.0107	0.0313	0.0195	0.0182	0.0078	0.0169	0.0086	0.0132	0.0056	0.0124	0.0194
MAG	MAG(18:0)	uM	0.2474	0.6791	0.1359	0.3987	0.2691	0.4712	0.5424	1.2512	0.7639	0.2995	0.2564	0.9089	0.4668	0.3404	0.2163	0.4228	0.2063	0.3306	0.102	0.2556	0.4663
MAG	MAG(18:1)	uM	0.0243	0.0341	0.0138	0.0339	0.0243	0.1216	0.0314	0.0557	0.1718	0.144	0.1432	0.193	0.0679	0.0338	0.012	0.0409	0.0112	0.0248	0.0318	0.053	0.0631
MAG	MAG(18:2)	uM	0.0209	0.0304	0.0171	0.0449	0.0316	0.1128	0.0344	0.064	0.1964	0.126	0.1629	0.213	0.0979	0.0377	0.0132	0.0522	0.0095	0.0272	0.0266	0.0499	0.0738
MAG	MAG(18:3)	uM	0.0026	0.0035	0.002	0.0034	0.0031	0.0076	0.0028	0.0043	0.0071	0.0039	0.008	0.0095	0.0061	0.0041	0.0021	0.0027	0.0024	0.0028	0.0044	0.004	0.0044
MAG	MAG(18:4)	uM	0.0022			0.0015	0.0013										0.0019	0.0014			0.0025
MAG	MAG(20:0)	uM	0.0056	0.008	0.004	0.004	0.0043	0.0062	0.0065	0.0136	0.01	0.0052	0.0048	0.0105	0.0063	0.0055	0.0039	0.0046	0.0035	0.0046	0.0044	0.0052	0.0067
MAG	MAG(20:1)	uM	0.0021		0.0018	0.0021	0.0022	0.0045	0.0026	0.0031	0.0087	0.0085	0.0062	0.0049	0.0031	0.0025	0.0022	0.0024	0.0018	0.0027	0.0033	0.003	0.0044
MAG	MAG(20:2)	uM		0.0034	0.0024	0.002	0.0021	0.0035	0.0023	0.0023	0.0052	0.0041	0.0047	0.0044	0.0024	0.0031	0.0015	0.0023			0.0036	0.0026	0.0025
MAG	MAG(20:3)	uM	0.0022	0.0028	0.0017	0.0031	0.0021		0.0026	0.0024	0.0045	0.0058	0.0025	0.0051	0.0028	0.0024	0.0019	0.002	0.0018	0.0021	0.0022		0.0029
MAG	MAG(20:4)	uM	0.0031	0.004	0.0032	0.0036	0.0033	0.005	0.0039	0.0054	0.0085	0.0076	0.0058	0.01	0.0047	0.0026	0.003	0.0019	0.0018	0.0023	0.0029	0.0032	0.0032
MAG	MAG(20:5)	uM	0.0021	0.0034	0.0015	0.0019	0.0019	0.0038	0.0029	0.0023		0.0033	0.0033	0.0027	0.0029	0.0021	0.0021	0.0024	0.002	0.0026	0.0033	0.003	0.0029
MAG	MAG(22:0)	uM		0.0035	0.0016	0.0022	0.0026	0.0043	0.0022	0.003	0.003		0.0034	0.0026	0.0033	0.0027	0.0024	0.002	0.002	0.0022	0.0027		0.0029
MAG	MAG(22:1)	uM	0.0151	0.0093	0.006	0.0056	0.0068	0.0104	0.012	0.009	0.0098	0.0146	0.0093	0.0157	0.0125	0.0076	0.0049	0.0052	0.0059	0.0076	0.0074	0.0072	0.0069
MAG	MAG(22:2)	uM	0.0227	0.0166	0.0129	0.0129	0.0113	0.017	0.0232	0.0156	0.0218	0.0259	0.0243	0.0315	0.0288	0.0114	0.0085	0.0112	0.0104	0.0145	0.0169	0.0141	0.0121
MAG	MAG(22:4)	uM
MAG	MAG(22:5)	uM	0.0034	0.004	0.0023	0.0038	0.0026	0.0039	0.0044	0.0074	0.0064	0.0033	0.0035	0.0081	0.0067	0.0042	0.0036	0.0043	0.0019	0.0041	0.0028	0.0034	0.0038
MAG	MAG(22:6)	uM	0.0028	0.0038	0.0026	0.0046	0.0035	0.0056	0.0047	0.005	0.0108	0.0069	0.007	0.0088	0.0063	0.0049	0.0024	0.0042	0.0018	0.0039	0.0035	0.0035	0.0062
MAG	MAG(24:0)	uM	0.0017	0.0022	0.0018								0.0036			0.0026	0.0019	0.0012	0.0011	0.0019	0.0018	0.0015	0.0025
MAG	MAG(24:1)	uM	0.0015	0.003	0.0019	0.0022		0.0029	0.0016		0.0026	0.0029		0.0021		0.0016	0.002		0.0018	0.0015	0.0019		0.003
PC	PC(12:0/16:1)	uM								0.0145		0.0194
PC	PC(12:0/18:1)	uM	0.1759	0.1277	0.1252	0.1252	0.1099	0.0634	0.1041	0.101	0.1847	0.1406	0.1138	0.0788	0.0884	0.0944	0.1238	0.1084	0.1107	0.1052	0.1248	0.0985	0.1102
PC	PC(12:0/18:2)	uM	0.024	0.0258	0.0304	0.0232	0.0154	0.0228	0.0289	0.0147	0.0473	0.0266	0.0402	0.0315	0.0278		0.0203	0.0237	0.0201	0.0195	0.0242	0.0223
PC	PC(14:0/16:1)	uM	0.02	0.0185											0.0189				0.0123
PC	PC(14:0/18:1)	uM	0.1561	0.1003	0.0747	0.0837	0.1018	0.1202	0.1133	0.1142	0.1807	0.2142	0.1649	0.164	0.1197	0.0897	0.0765	0.0757	0.0842	0.0963	0.0813	0.1025	0.0966
PC	PC(14:0/18:2)	uM	0.2298	0.1714	0.1511	0.1757	0.1326	0.2068	0.2052	0.2097	0.394	0.3012	0.3023	0.2777	0.2338	0.164	0.1531	0.1777	0.134	0.1706	0.1432	0.1734	0.1327
PC	PC(14:0/18:3)	uM
PC	PC(14:0/20:3)	uM	0.0153
PC	PC(14:0/20:4)	uM	0.0448	0.0677	0.0328	0.0467	0.0441	0.0639	0.0373	0.0314	0.0664	0.0545	0.0639	0.0474	0.0336		0.0317	0.0397	0.0329	0.0377	0.0393	0.0594	0.0454
PC	PC(14:0/22:4)	uM
PC	PC(14:0/22:5)	uM
PC	PC(14:0/22:6)	uM	0.0915		0.0562		0.06	0.1125	0.0952	0.0577	0.084	0.0831	0.1407	0.1053	0.0949	0.0896	0.076	0.0889	0.0613	0.0609	0.0809	0.0663	0.0945
PC	PC(15:0/14:1)	uM	0.0605	0.0739		0.0446	0.0401		0.0706	0.0522			0.0688	0.0629	0.0452		0.0514	0.0542	0.0408	0.0497	0.0505
PC	PC(15:0/16:1)	uM
PC	PC(15:0/18:1)	uM	0.0476	0.0423	0.0369	0.0364	0.0289	0.0397	0.0463	0.0258	0.0541	0.0498	0.0347	0.0434	0.0392	0.0315	0.0346	0.0217	0.0306	0.0356	0.0247	0.0277	0.0281
PC	PC(15:0/18:2)	uM	0.0909	0.0824	0.0734	0.0592	0.0683	0.1038	0.1055	0.0708	0.1149	0.1234	0.1038	0.1268	0.1063	0.094	0.0713	0.0625	0.0659	0.089	0.0726	0.0695	0.0807
PC	PC(15:0/20:4)	uM	0.0444	0.0549											0.0301	0.0493	0.0429	0.0389	0.0383	0.0338		0.0469
PC	PC(15:0/22:6)	uM	0.077	0.0548	0.0552	0.0588	0.0644	0.0669	0.0659	0.0481		0.0742		0.056	0.0857		0.0669	0.0794	0.0513	0.0717	0.0586	0.0651	0.1001
PC	PC(16:0/12:0)	uM	0.297	0.2771	0.2372	0.229	0.1793	0.1534	0.2758	0.2673	0.2755	0.196	0.2534	0.1961	0.2265	0.2251	0.2109	0.2359	0.185	0.202	0.2565	0.2174	0.2446
PC	PC(16:0/14:0)	uM	0.02				0.0128			0.0163	0.0233	0.0251	0.0228	0.0229	0.0198	0.0194	0.0138	0.0127		0.0159		0.0188
PC	PC(16:0/16:0)	uM	0.5873	0.6328	0.4438	0.6496	0.5684	0.8363	0.7135	0.9276	1.2982	0.9577	0.9667	1.156	1.0691	0.818	0.5469	0.6657	0.557	0.776	0.6627	0.6534	0.7228
PC	PC(16:0/16:1)	uM	0.9298	0.5359	0.2875	0.4762	0.4079	0.6214	0.4063	0.6459	0.6852	1.1367	0.7516	0.8496	0.7736	0.4208	0.3895	0.3627	0.3355	0.3413	0.312	0.578	0.3523
PC	PC(16:0/18:0)	uM	0.9381	0.6997	0.5329	0.5674	0.6096	0.901	0.8235	0.9058	1.0587	0.7926	0.9707	1.1129	0.9355	0.8133	0.7737	0.6345	0.7354	0.8307	0.6493	0.6789	0.6787
PC	PC(16:0/18:1)	uM	19.7939	12.8114	9.1993	10.5772	11.8344	18.8883	17.2471	15.021	17.9966	24.1674	16.9947	22.2168	19.6883	16.7072	12.2067	9.8366	10.611	13.1727	10.2555	14.5404	10.7461
PC	PC(16:0/18:2)	uM	46.4423	47.0778	39.7985	43.682	40.8783	64.75	64.1381	56.1242	72.9057	70.6715	69.5347	78.5082	75.7829	54.7249	43.6785	48.0795	35.9132	55.2967	49.2321	54.2386	49.8114
PC	PC(16:0/18:3)	uM	1.1024	0.8563	0.6295	0.7601	0.7093	0.9173	0.6556	0.82	1.3814	0.981	1.2321	1.1914	1.0382	0.7799	0.6766	0.736	0.615	0.8508	0.6337	0.742	0.7198
PC	PC(16:0/20:1)	uM	0.0524	0.0502	0.0471	0.0401	0.0558	0.0463	0.0411	0.0339	0.069	0.0743	0.0489	0.053	0.0455	0.046	0.0469	0.0412	0.0401	0.0478	0.0366	0.0443	0.0416
PC	PC(16:0/20:2)	uM	0.2597	0.1999	0.109	0.1743	0.1629	0.0954	0.0967	0.0893	0.1246	0.1919	0.0792	0.1496	0.127	0.1269	0.1674	0.1055	0.1281	0.1983	0.1503	0.1188	0.1466
PC	PC(16:0/20:3)	uM	3.3987	2.3575	1.7834	2.0995	2.4172	1.085	0.9709	0.9435	1.474	2.2182	1.2609	1.5576	1.1042	1.1792	2.011	1.179	1.7451	2.3348	1.5472	1.4952	1.5847
PC	PC(16:0/20:4)	uM	14.1077	14.8377	9.5813	14.2035	13.9284	10.5277	9.9164	8.2532	10.7608	15.434	10.1354	13.6292	11.7141	9.1267	9.8912	12.0354	10.2042	12.788	11.5764	11.193	13.2455
PC	PC(16:0/20:5)	uM	2.3996	2.0474	1.2874	1.7388	1.6486	1.1051	1.3859	1.5939	1.3843	0.9988	1.4751	1.6031	1.5416	1.0908	1.4084	1.7478	1.2907	1.3579	1.788	1.2304	1.3826
PC	PC(16:0/22:4)	uM	0.0931	0.0567	0.0452	0.049	0.0658	0.0678	0.0712	0.0712	0.102	0.0856	0.0724	0.1151	0.0902	0.0666	0.0483	0.0488	0.0581	0.0543	0.057	0.0641	0.0737
PC	PC(16:0/22:5)	uM	1.4786	1.2153	0.76	1.0283	0.9774	1.2017	1.1692	1.208	1.0481	1.0164	1.1174	1.6205	1.529	1.004	0.9509	1.0356	0.7266	1.034	0.9485	1.0232	1.0357
PC	PC(16:0/22:6)	uM	24.4788	20.6088	13.4117	17.7739	16.9059	21.5244	19.0176	18.729	18.7184	17.814	20.7236	25.7223	22.8032	20.0515	16.7785	19.89	13.9006	21.6357	18.7124	16.9545	20.3573
PC	PC(17:0/14:1)	uM	0.0623	0.0713	0.0479	0.0714	0.0449	0.0569	0.0919	0.0718	0.1134	0.0623	0.1014	0.0784	0.0862	0.0622	0.0658	0.0561	0.0487	0.0556	0.0636
PC	PC(17:0/16:1)	uM
PC	PC(17:0/18:1)	uM	0.0593	0.0735	0.0365	0.0463	0.0487	0.0491	0.058	0.0385	0.0609	0.0695	0.0767	0.0449	0.0627	0.0357	0.0368	0.0331	0.0392	0.0394	0.0438	0.0407	0.0416
PC	PC(17:0/18:2)	uM	0.1801	0.2426	0.205	0.1789	0.172	0.1935	0.2122	0.1722	0.3002	0.1943	0.2492	0.2341	0.2179	0.14	0.1806	0.1711	0.1697	0.2138	0.1772	0.1327	0.1884
PC	PC(17:0/20:3)	uM	0.057	0.0508	0.0501		0.0367				0.06			0.0421			0.0437	0.0385	0.0388	0.0446	0.057
PC	PC(17:0/20:4)	uM	0.1515	0.1467	0.121	0.1389	0.1257	0.0987	0.1234	0.0998	0.1657	0.2109	0.1554	0.1736	0.1175	0.0997	0.1289	0.1106	0.1089	0.1404	0.1234	0.0926	0.1758
PC	PC(17:0/20:5)	uM	0.032														0.0279		0.0278
PC	PC(17:0/22:5)	uM	0.0337
PC	PC(17:0/22:6)	uM	0.13	0.1077	0.0934	0.1095	0.0942	0.1288	0.1574	0.1041	0.1444	0.1185	0.1362	0.1279	0.1302	0.1059	0.1171	0.1387	0.0876	0.1468	0.1234	0.0633	0.1264
PC	PC(18:0/12:0)	uM	0.4084	0.3996	0.4174	0.3007	0.307	0.3189	0.4644	0.4093	0.6192	0.3339	0.5015	0.3559	0.4098	0.4074	0.3768	0.3555	0.3161	0.3636	0.3808	0.351	0.3865
PC	PC(18:0/14:0)	uM
PC	PC(18:0/16:1)	uM	0.1212	0.0965	0.0402	0.0674	0.0569	0.0703	0.061	0.0851	0.0843	0.09	0.0876	0.0868	0.0872	0.055	0.0654	0.0518	0.0672	0.0468	0.0436	0.0734	0.0522
PC	PC(18:0/18:0)	uM	0.2029	0.223	0.1789	0.2089	0.1933	0.2633	0.1943	0.2374	0.3055	0.2376	0.2596	0.2789	0.2756	0.2246	0.1989	0.1762	0.177	0.2096	0.1927	0.2094	0.2463
PC	PC(18:0/18:1)	uM	2.1949	1.6563	1.4261	1.4227	1.5413	2.1371	1.8913	1.9052	1.7946	1.5267	1.9413	2.1799	2.2052	1.6195	1.6366	1.2912	1.4536	1.6787	1.5099	1.4898	1.4277
PC	PC(18:0/18:2)	uM	16.5664	17.0202	16.3762	15.167	14.5019	17.0832	16.2672	16.7137	17.1408	10.4668	17.4094	18.5704	18.0072	13.4402	15.8692	14.7524	13.9589	18.5351	17.0762	12.7988	15.844
PC	PC(18:0/18:3)	uM	0.1979	0.1434	0.1428	0.1407	0.125	0.1458	0.1073	0.1164	0.1861	0.1066	0.1816	0.1119	0.1275	0.1075	0.1324	0.1028	0.1213	0.1564	0.117	0.085	0.1237
PC	PC(18:0/20:0)	uM	0.1641	0.1442	0.1045	0.1286	0.1516	0.1275	0.1291	0.1418	0.1888	0.2149	0.1747	0.179	0.1658	0.1408	0.1297	0.1301	0.1252	0.1561	0.1311	0.1199	0.1421
PC	PC(18:0/20:1)	uM	0.0224		0.0273			0.0257		0.0277	0.0316	0.0307		0.0274			0.0193	0.0211		0.025	0.0247	0.0228
PC	PC(18:0/20:2)	uM	0.0959	0.0854	0.0604	0.0797	0.062	0.033	0.0446	0.0282	0.0524	0.0422	0.0401	0.0449	0.0388	0.0505	0.0713	0.0285	0.0541	0.0693	0.0577	0.0359	0.066
PC	PC(18:0/20:3)	uM	1.2322	1.0747	0.8413	0.982	1.0473	0.4963	0.4968	0.5227	0.6199	0.7134	0.6104	0.6785	0.5722	0.5336	1.0114	0.5623	0.8104	0.9992	0.7041	0.6146	0.8146
PC	PC(18:0/20:4)	uM	6.0313	7.918	5.4195	7.164	7.284	5.7723	5.1406	4.7351	4.8228	5.681	4.8137	6.516	5.9489	4.7739	5.6372	6.3554	5.7138	6.1909	6.2453	5.2385	7.2272
PC	PC(18:0/20:5)	uM	0.7717	0.7736	0.5247	0.6963	0.6191	0.4075	0.4932	0.6075	0.4136	0.339	0.539	0.4937	0.5206	0.382	0.5229	0.6428	0.5037	0.5163	0.63	0.3651	0.6691
PC	PC(18:0/22:4)	uM	0.0444	0.0367			0.0334		0.0365	0.0412		0.0451		0.0584	0.0324			0.0226	0.0321
PC	PC(18:0/22:5)	uM	0.3506	0.3451	0.2122	0.2556	0.2877	0.3408	0.3879	0.3889	0.2697	0.2276	0.2901	0.4259	0.4118	0.287	0.2508	0.3119	0.2363	0.3075	0.2359	0.2956	0.2946
PC	PC(18:0/22:6)	uM	6.0918	4.9961	3.7523	4.2243	4.3249	5.8044	5.6219	5.8244	4.5583	3.24	5.5802	6.2999	6.3345	4.7685	4.2953	5.0949	3.7912	5.3781	4.8236	4.1049	5.0809
PC	PC(18:1/16:1)	uM	0.8227	0.4949	0.285	0.3409	0.3503	0.6124	0.5277	0.6423	1.0059	1.8123	0.9481	0.9431	0.6505	0.4814	0.4214	0.3038	0.4038	0.3947	0.3195	0.5624	0.3497
PC	PC(18:1/18:1)	uM	0.5495	0.5463	0.3397	0.3854	0.4022	0.6107	0.5573	0.5043	0.9541	1.0627	0.7523	0.6825	0.5471	0.4601	0.4253	0.3299	0.3986	0.4599	0.3965	0.4816	0.3641
PC	PC(18:1/18:2)	uM	4.1621	4.8878	3.8389	4.1005	3.9167	4.1409	4.7403	4.0793	7.974	7.2258	6.5287	5.309	4.571	3.7615	3.9479	3.4715	3.8233	4.8753	4.5076	4.2738	4.2062
PC	PC(18:1/18:3)	uM	0.1314	0.1191	0.0735	0.0745	0.0965	0.0925	0.0947	0.0847	0.243	0.218	0.1794	0.1321	0.1041	0.0964	0.0963	0.0723	0.0824	0.0855	0.0808	0.0854	0.086
PC	PC(18:1/20:1)	uM	0.0267			0.0223	0.023	0.031				0.0359		0.0365		0.0267	0.017		0.0203		0.0157	0.0236
PC	PC(18:1/20:2)	uM	0.0439	0.0363	0.0263	0.0336	0.029		0.032	0.017	0.0381	0.0377		0.0336	0.0192		0.0285	0.0146	0.0209	0.032	0.0173	0.0204
PC	PC(18:1/20:3)	uM	0.4026	0.295	0.2005	0.282	0.2869	0.1068	0.1307	0.1049	0.1647	0.2914	0.1749	0.1789	0.1047	0.1318	0.2327	0.1242	0.2284	0.261	0.2025	0.1677	0.2048
PC	PC(18:1/20:4)	uM	1.5042	1.9531	1.2718	1.8325	1.955	1.0598	1.2875	0.9998	1.6056	2.7415	1.4864	1.5119	1.1868	1.2118	1.2265	1.3668	1.4498	1.5277	1.404	1.384	1.6227
PC	PC(18:1/20:5)	uM	0.2879	0.2569	0.1531	0.2173	0.1865	0.1306	0.1679	0.1559	0.2018	0.2061	0.1642	0.1988	0.1374	0.1231	0.1512	0.1777	0.1586	0.1437	0.1721	0.1246	0.1634
PC	PC(18:1/22:4)	uM
PC	PC(18:1/22:5)	uM	0.1226	0.1235	0.0584	0.0943	0.0717	0.0719	0.1252	0.0866	0.0909	0.125	0.1033	0.1348	0.1137	0.0935	0.0696	0.0913	0.0729	0.0863	0.0756	0.1089	0.1024
PC	PC(18:1/22:6)	uM	2.5669	2.0685	1.3164	1.6935	1.7044	1.5705	1.8808	1.4327	1.9984	2.3752	2.0057	2.0651	1.7264	1.804	1.6104	1.6262	1.5804	2.148	1.8996	1.7568	2.0227
PC	PC(18:2/16:1)	uM	1.4447	1.3388	0.8362	1.0756	0.9644	1.4927	1.4641	1.6997	3.2438	4.3434	2.6106	2.4125	1.943	1.1843	1.0722	1.0343	0.838	1.0909	0.9145	1.3896	1.033
PC	PC(18:2/18:2)	uM	1.2015	1.718	1.3767	1.2891	1.2083	1.1138	1.5935	1.3002	3.3171	2.3269	2.3802	1.5738	1.4052	1.2721	1.3207	1.2712	1.2354	1.5913	1.7785	1.4509	1.5114
PC	PC(18:2/18:3)	uM	0.1632	0.2189	0.1715	0.1596	0.1835	0.2323	0.1875	0.251	0.6084	0.5027	0.4801	0.3172	0.2933	0.1821	0.166	0.1872	0.1538	0.1795	0.2055	0.2376	0.2326
PC	PC(18:2/20:1)	uM	0.1026	0.0862	0.0711	0.064	0.0531	0.0491	0.0599	0.054	0.0529	0.1031	0.0678	0.0609	0.0472	0.0615	0.0746	0.047	0.0758	0.0496	0.0492	0.0678	0.0568
PC	PC(18:2/20:2)	uM	0.0615	0.0548	0.0469	0.0487	0.0453	0.0417	0.0403	0.0339	0.0533	0.0697	0.0531	0.0467	0.0349	0.0365	0.0482	0.0394	0.0464	0.0565	0.0437	0.0469	0.0477
PC	PC(18:2/20:3)	uM	0.2385	0.2604	0.1618	0.1969	0.1826	0.1068	0.1029	0.1039	0.1972	0.2027	0.1481	0.146	0.0937	0.1339	0.1864	0.1046	0.1743	0.184	0.1488	0.1746	0.1604
PC	PC(18:2/20:4)	uM	0.9536	1.167	0.7525	0.9574	0.9867	0.5492	0.7091	0.5815	0.9382	1.139	0.8521	0.8524	0.6984	0.726	0.7603	0.7409	0.8201	0.8627	0.9379	0.8359	1.0104
PC	PC(18:2/20:5)	uM	0.1984	0.2434	0.1106	0.1633	0.1457	0.0917	0.1524	0.1281	0.1785	0.1354	0.1802	0.1209	0.1274	0.1194	0.1561	0.1701	0.1227	0.1464	0.1828	0.1635	0.1704
PC	PC(18:2/22:4)	uM	0.0552	0.0716	0.049	0.0617	0.0487	0.0842	0.0429	0.0681	0.0681	0.0584	0.0967	0.0719	0.0581	0.0681	0.0545	0.0469	0.0345	0.0637	0.0621	0.0602	0.0587
PC	PC(18:2/22:5)	uM	0.0833	0.079	0.0692	0.1007	0.0823	0.0644	0.0731	0.0914	0.1032	0.1215	0.0982	0.0817	0.0826	0.0677	0.0777	0.0809	0.0598	0.069	0.0887	0.0804	0.1139
PC	PC(18:2/22:6)	uM	0.6681	0.6524	0.4961	0.4817	0.5618	0.4346	0.6087	0.4771	0.9728	1.0976	0.8624	0.5942	0.4432	0.6006	0.4652	0.5179	0.5331	0.6652	0.7056	0.616	0.6357
PC	PC(20:0/14:1)	uM	0.0257	0.0281	0.0218	0.0278	0.0216	0.0381	0.0277	0.0343	0.0347	0.0351	0.043	0.0367	0.0357	0.0285	0.0174	0.0246	0.0254	0.0209	0.017	0.0329	0.0246
PC	PC(20:0/16:1)	uM	0.0205							0.0151		0.0199					0.0096		0.0104
PC	PC(20:0/18:1)	uM	0.2673	0.1534	0.147	0.134	0.177	0.2453	0.251	0.1998	0.2284	0.2784	0.2198	0.2621	0.2568	0.2195	0.1611	0.1366	0.1362	0.1692	0.126	0.1848	0.1389
PC	PC(20:0/18:2)	uM	0.9768	0.8252	0.7655	0.7736	0.7046	0.8954	0.9512	0.8188	1.1894	1.0632	0.9922	1.1119	1.0794	0.8851	0.8143	0.787	0.6808	0.9389	0.7987	0.868	0.7508
PC	PC(20:0/18:3)	uM	0.0192		0.0191		0.016			0.0155	0.028	0.02	0.0311	0.0212			0.0185		0.015		0.0184
PC	PC(20:0/20:3)	uM	0.0444	0.0399	0.0444	0.0407	0.0409	0.0256		0.0187	0.0319	0.034				0.0306	0.0359	0.0262	0.0361	0.043	0.0244	0.0227	0.0395
PC	PC(20:0/20:4)	uM	0.3077	0.2894	0.2233	0.2655	0.2656	0.1871	0.1565	0.1537	0.172	0.3186	0.1599	0.2062	0.2067	0.2018	0.2085	0.2111	0.2175	0.2457	0.2268	0.2187	0.2523
PC	PC(20:0/20:5)	uM	0.0592	0.0575	0.0333		0.0407		0.0292	0.0371								0.0396	0.0221	0.0381	0.0458	0.0385	0.0471
PC	PC(20:0/22:5)	uM															0.0241
PC	PC(20:0/22:6)	uM	0.3984	0.3273	0.2315	0.2935	0.2443	0.2603	0.2831	0.2809	0.2426	0.2504	0.278	0.3619	0.3861	0.3251	0.2338	0.3421	0.2741	0.3735	0.2125	0.271	0.313
PE	PE(14:0/18:2)	uM										0.0141
PE	PE(14:0/22:6)	uM	0.0265
PE	PE(15:0/22:6)	uM	0.0479	0.0299	0.0303	0.0297	0.0341	0.0431	0.0428	0.0291	0.0368	0.0397	0.0483	0.0644	0.0455	0.0345	0.0337	0.0304	0.0301	0.0268	0.023	0.0266	0.0311
PE	PE(16:0/16:0)	uM	0.0035	0.0047		0.0043	0.0036	0.0051	0.0026	0.0042	0.0056	0.0058	0.0038	0.0065	0.0049	0.0042	0.0023	0.0029	0.0024	0.0038	0.0038	0.0038
PE	PE(16:0/16:1)	uM	0.032	0.0201	0.0116	0.0227	0.0161	0.0204	0.0137	0.0274	0.0213	0.0489	0.0293	0.0289	0.027	0.0155	0.0161	0.0111	0.016	0.0168	0.0102	0.025	0.012
PE	PE(16:0/18:1)	uM	0.4006	0.3533	0.2	0.2659	0.2509	0.432	0.3215	0.387	0.4957	0.8422	0.5522	0.6444	0.4354	0.4002	0.2636	0.2073	0.245	0.3213	0.2539	0.3196	0.2773
PE	PE(16:0/18:2)	uM	4.1988	4.0484	3.7128	3.5832	3.4342	5.7639	6.3694	6.2435	7.8524	8.2876	7.8519	8.5871	6.5074	5.2881	3.9075	3.6119	3.3593	4.0713	4.046	4.8574	3.9687
PE	PE(16:0/18:3)	uM	0.1263	0.0653	0.0793	0.0839	0.0769	0.1693	0.0995	0.242	0.2823	0.3005	0.4008	0.3167	0.1851	0.1216	0.0702	0.0939	0.0678	0.0972	0.0898	0.1119	0.0856
PE	PE(16:0/20:1)	uM	0.0522	0.0272	0.0212	0.0268	0.0246	0.0231	0.0286	0.0237	0.0338	0.0466	0.0165	0.0381	0.0206	0.0284	0.0283	0.0174	0.0192	0.031	0.0184	0.025	0.0258
PE	PE(16:0/20:2)	uM	0.0556	0.0502	0.0317	0.0434	0.0416	0.033	0.0337	0.0344	0.0634	0.1275	0.035	0.0571	0.0392	0.043	0.0493	0.022	0.0262	0.0445	0.028	0.0517	0.0516
PE	PE(16:0/20:3)	uM	0.4292	0.2974	0.2064	0.2671	0.2747	0.2253	0.1958	0.1763	0.24	0.3404	0.2299	0.2678	0.2194	0.1852	0.2208	0.1437	0.2074	0.2438	0.2106	0.2342	0.1858
PE	PE(16:0/20:4)	uM	7.5963	5.7519	4.0028	5.1277	5.9424	6.6482	6.1724	5.9176	6.6281	7.7317	6.3727	6.1947	7.1114	4.4035	4.8887	5.1688	4.358	4.9111	4.8486	5.1186	4.9489
PE	PE(16:0/20:5)	uM	0.8309	0.5236	0.7394	0.6264	0.536	0.4825	0.6557	0.8734	0.5413	0.5943	0.6628	0.7669	0.637	0.4718	0.6435	0.6461	0.5363	0.5068	0.7084	0.5709	0.6314
PE	PE(16:0/22:4)	uM	0.0951	0.053	0.0271	0.0569	0.0524	0.1195	0.0895	0.1048	0.081	0.1227	0.0821	0.111	0.1102	0.0584	0.0443	0.0484	0.0342	0.0397	0.041	0.0568	0.0452
PE	PE(16:0/22:5)	uM	1.626	0.7884	0.483	0.9177	0.6633	1.2613	1.1485	1.3197	1.4355	0.9651	1.1471	1.7148	1.5026	0.8402	0.6762	0.8638	0.5664	0.9288	0.7493	0.8586	1.0071
PE	PE(16:0/22:6)	uM	37.9787	25.66	16.8933	21.9448	22.2605	32.0498	39.5421	34.4701	31.9951	32.6056	26.8508	41.4966	40.5637	27.2958	21.0277	25.648	17.4741	33.3788	22.8434	25.9633	24.7767
PE	PE(17:0/18:1)	uM	0.0134		0.0143			0.0215	0.0155		0.0313	0.0271	0.0225		0.0242		0.0193		0.0145
PE	PE(17:0/18:2)	uM	0.0773	0.0795	0.0715	0.0526	0.0671	0.0855	0.1577	0.1026	0.1901	0.1342	0.1587	0.1237	0.0965	0.0699	0.0748	0.0648	0.0768	0.0772	0.0713	0.06	0.0737
PE	PE(17:0/20:2)	uM	0.0181		0.0153				0.0164	0.0182	0.0266	0.0208	0.0251	0.0225	0.0186		0.0151	0.0163	0.0121	0.0129	0.0167	0.013	0.0191
PE	PE(17:0/20:3)	uM	0.017		0.0133	0.0159	0.0199		0.0181		0.0269	0.0248	0.0259	0.0199	0.023	0.0159	0.0182	0.0133	0.0131		0.0163		0.0169
PE	PE(17:0/20:4)	uM	0.1897	0.1391	0.141	0.1293	0.137	0.1565	0.2274	0.1273	0.2648	0.2754	0.1944	0.2615	0.1831	0.1285	0.1223	0.1532	0.1556	0.1166	0.1453	0.1263	0.1625
PE	PE(17:0/20:5)	uM	0.0203	0.0162	0.0156	0.0114	0.0165	0.0199	0.0196		0.0231	0.018	0.0345	0.0263		0.0192	0.0199	0.0196	0.0104		0.018	0.0196
PE	PE(17:0/22:5)	uM	0.0259	0.0249	0.0138	0.0166	0.0183	0.0215	0.0333	0.0242	0.0455	0.0237	0.0379	0.0339	0.0323	0.0203	0.0138	0.0138	0.0194	0.0158	0.0237	0.0183	0.0167
PE	PE(17:0/22:6)	uM	0.2035	0.1615	0.1394	0.1229	0.1541	0.2002	0.2961	0.2019	0.3408	0.2245	0.2394	0.2806	0.2499	0.1651	0.1573	0.1789	0.1296	0.1532	0.1304	0.1546	0.1339
PE	PE(18:0/16:0)	uM	0.0125	0.0125	0.0061	0.0089	0.0112	0.0144	0.0087	0.0127	0.0164	0.0235	0.0136	0.0124	0.014	0.0106	0.009	0.0103	0.0099	0.012	0.008	0.0101	0.0111
PE	PE(18:0/16:1)	uM	0.0081	0.0128	0.0073	0.012	0.0108	0.0139	0.0065	0.0095		0.0118	0.0107	0.0174	0.0149	0.008	0.0081	0.0069	0.0068	0.0076	0.0078	0.0086	0.0118
PE	PE(18:0/18:0)	uM	0.0235	0.0263	0.0131	0.0178	0.0172	0.0331	0.0209	0.0211	0.0277	0.0262	0.0256	0.0327	0.0317	0.0236	0.0179	0.0169	0.0154	0.0229	0.021	0.0217	0.0208
PE	PE(18:0/18:1)	uM	0.498	0.4367	0.2717	0.367	0.3643	0.5594	0.4572	0.5379	0.5192	0.5974	0.4928	0.7161	0.6524	0.4464	0.3812	0.3152	0.2996	0.4044	0.3277	0.4173	0.3502
PE	PE(18:0/18:2)	uM	5.5923	6.3264	5.4528	4.7219	4.68	7.6212	6.85	7.4725	9.9852	6.0427	8.0313	8.8738	8.2171	5.7726	5.7862	5.3013	4.7136	5.9441	5.4642	5.7828	5.114
PE	PE(18:0/18:3)	uM	0.1043	0.0845	0.0671	0.0612	0.0742	0.1309	0.067	0.142	0.1856	0.1081	0.2121	0.1639	0.1094	0.0767	0.0739	0.0746	0.0577	0.0839	0.0569	0.0669	0.069
PE	PE(18:0/20:1)	uM	0.0536	0.0438	0.0283	0.037	0.0314	0.0366	0.0226	0.0286	0.0326	0.0341	0.0183	0.0602	0.0285	0.0313	0.041	0.0271	0.0298	0.0412	0.0241	0.0376	0.042
PE	PE(18:0/20:2)	uM	0.069	0.0665	0.0497	0.0495	0.0547	0.0368	0.0323	0.0347	0.0598	0.0726	0.0362	0.0611	0.0417	0.0438	0.0572	0.0372	0.0404	0.0513	0.034	0.0481	0.0455
PE	PE(18:0/20:3)	uM	1.3771	1.1342	0.8082	0.9915	1.116	1.0172	0.9269	0.8559	1.0456	1.3077	0.9711	1.3378	1.1193	0.8623	0.9072	0.674	0.8029	1.0256	0.9486	0.9567	0.9511
PE	PE(18:0/20:4)	uM	33.3258	31.5148	20.5973	24.512	28.5075	39.1771	35.9687	30.779	37.3038	35.7997	32.4682	33.9085	39.8706	25.3612	26.4029	28.2901	21.2725	27.1655	27.2585	25.9035	26.7238
PE	PE(18:0/20:5)	uM	2.8352	2.3235	3.1631	2.4052	2.1414	1.9889	2.9607	3.446	2.6224	2.2412	2.8273	3.0362	2.7258	2.544	3.1962	2.8065	2.519	2.446	3.2668	2.2074	2.6235
PE	PE(18:0/22:2)	uM								0.0077							0.0063					0.0092
PE	PE(18:0/22:4)	uM	0.1569	0.1128	0.0583	0.0946	0.1077	0.2621	0.1553	0.1572	0.16	0.1668	0.1656	0.1736	0.176	0.1007	0.1033	0.0917	0.0715	0.0961	0.0804	0.1209	0.1161
PE	PE(18:0/22:5)	uM	1.0533	0.5494	0.372	0.6309	0.5108	1.1452	0.9511	1.0992	1.3965	0.6706	0.8301	1.2243	1.1792	0.6404	0.5561	0.7245	0.4537	0.7852	0.6229	0.7373	0.7685
PE	PE(18:0/22:6)	uM	21.7399	16.0776	11.6124	12.9552	13.5298	23.6504	27.7753	26.1693	28.395	19.1488	18.3427	26.4018	30.084	17.5226	14.4751	17.5232	11.0468	22.4055	15.1434	18.3196	15.3833
PE	PE(18:1/16:1)	uM	0.0139	0.0164	0.0086	0.0086	0.007	0.0127	0.0066	0.0141	0.0276	0.0537	0.0208	0.0212	0.0147	0.011	0.0091	0.0073	0.0067	0.0048	0.0102	0.0086	0.0111
PE	PE(18:1/18:1)	uM	0.0744	0.0859	0.0469	0.0588	0.0576	0.0769	0.0632	0.0762	0.1898	0.2641	0.144	0.1128	0.0832	0.069	0.0555	0.0453	0.0559	0.0722	0.0625	0.0653	0.0574
PE	PE(18:1/18:2)	uM	1.8757	2.282	1.6692	1.734	1.7026	1.7244	1.9509	1.8737	4.9264	4.2746	3.5837	2.4804	1.953	1.714	1.6917	1.4465	1.5548	1.8409	1.6943	1.7656	1.5948
PE	PE(18:1/18:3)	uM	0.0539	0.0386	0.0308	0.0321	0.0345	0.0441	0.0322	0.0559	0.1433	0.1545	0.1294	0.0654	0.0462	0.0264	0.0295	0.0282	0.0309	0.0447	0.041	0.0403	0.0464
PE	PE(18:1/20:1)	uM	0.0239	0.0218	0.0124	0.019	0.0143	0.018	0.0154	0.019	0.0507	0.0786	0.015	0.0338	0.0127	0.0205	0.0182	0.0121	0.0144	0.0242	0.0121	0.0179	0.0179
PE	PE(18:1/20:2)	uM	0.026	0.0299	0.0156	0.0166	0.0159	0.0168	0.0124	0.0123	0.058	0.0751	0.0294	0.0226	0.0206	0.0173	0.0178	0.015	0.0139	0.0196	0.0167	0.0156	0.0156
PE	PE(18:1/20:3)	uM	0.2612	0.231	0.1431	0.1959	0.1975	0.1201	0.1106	0.1076	0.2067	0.3798	0.1951	0.1663	0.1385	0.1341	0.1571	0.0978	0.1466	0.1836	0.1542	0.1655	0.1368
PE	PE(18:1/20:4)	uM	4.112	4.3114	2.5999	3.6792	4.212	3.1098	3.2974	2.75	4.796	7.431	3.8004	3.2279	3.5797	2.3701	3.0157	3.4265	2.7483	3.1976	3.0995	3.0933	3.4253
PE	PE(18:1/20:5)	uM	0.5082	0.3923	0.4174	0.4179	0.4218	0.2162	0.3692	0.4068	0.4433	0.4651	0.3901	0.3568	0.2991	0.2936	0.4354	0.4054	0.3546	0.3936	0.4782	0.2802	0.3896
PE	PE(18:1/22:0)	uM	0.0067		0.0035														0.0039
PE	PE(18:1/22:1)	uM
PE	PE(18:1/22:2)	uM
PE	PE(18:1/22:4)	uM	0.0265			0.0213	0.0256	0.0457	0.0187	0.034	0.0689	0.0619	0.0311	0.0444	0.0335	0.0142	0.0119	0.0248	0.0116	0.0203	0.0194	0.0233	0.0243
PE	PE(18:1/22:5)	uM	0.2528	0.1469	0.0948	0.1709	0.1222	0.2196	0.1921	0.2077	0.4855	0.3201	0.224	0.2794	0.2213	0.1451	0.1146	0.1652	0.11	0.196	0.1656	0.1866	0.2376
PE	PE(18:1/22:6)	uM	8.1411	6.3052	3.851	5.1571	5.6497	5.0805	8.6149	6.2403	11.063	11.8476	6.5961	7.3475	8.002	5.3981	4.7464	6.0491	3.8311	7.686	5.7043	5.9551	5.7202
PE	PE(18:2/16:1)	uM	0.0952	0.0961	0.0623	0.0748	0.0779	0.0802	0.0802	0.1106	0.2732	0.4299	0.202	0.1706	0.11	0.0695	0.0712	0.0616	0.0608	0.0591	0.0594	0.0892	0.0699
PE	PE(18:2/18:2)	uM	0.1572	0.1963	0.2004	0.14	0.1412	0.2028	0.3095	0.2509	1.1446	0.7295	0.7424	0.3199	0.2509	0.2269	0.1733	0.1603	0.1747	0.1983	0.2456	0.2239	0.1849
PE	PE(18:2/18:3)	uM	0.0206	0.0192	0.022	0.0143	0.015	0.0234	0.0211	0.048	0.1576	0.1406	0.1378	0.0367	0.0313	0.0226	0.0163	0.0232	0.0143	0.0163	0.0228	0.0295	0.0167
PE	PE(18:2/20:1)	uM	0.0264	0.0289	0.0225	0.0236	0.022	0.024	0.0271	0.0317	0.0828	0.0836	0.0511	0.043	0.0268	0.0202	0.0264	0.0187	0.0242	0.0241	0.0191	0.0283	0.023
PE	PE(18:2/20:2)	uM	0.0206	0.02	0.015	0.0115	0.0128	0.0225	0.0159	0.0187	0.0655	0.0596	0.0337	0.0254	0.0171	0.0135	0.0165	0.0099	0.0153	0.0145	0.0156	0.0167	0.0191
PE	PE(18:2/20:3)	uM	0.048	0.0277	0.0361	0.0274	0.0299	0.0157	0.0282	0.029	0.0844	0.114	0.0489	0.0377	0.0285	0.0234	0.0256	0.0243	0.0268	0.0287	0.0289	0.0368	0.0288
PE	PE(18:2/20:4)	uM	0.3074	0.2673	0.1983	0.2119	0.2453	0.1859	0.2643	0.1841	0.5528	0.5781	0.4113	0.2044	0.2025	0.1833	0.2222	0.218	0.2327	0.2321	0.2589	0.218	0.2409
PE	PE(18:2/20:5)	uM	0.0293	0.0258	0.0458	0.0527	0.0328		0.0312		0.053	0.0413	0.0596	0.0591		0.0366	0.0452	0.0366	0.033	0.03	0.0466	0.0398	0.0505
PE	PE(18:2/22:1)	uM	0.0044		0.0045							0.0074			0.0087				0.0037
PE	PE(18:2/22:2)	uM
PE	PE(18:2/22:4)	uM							0.0163		0.0298	0.024
PE	PE(18:2/22:5)	uM	0.023	0.0165	0.0135		0.0176	0.0307	0.0435	0.0472	0.1971	0.0614	0.0511	0.0402	0.0326	0.024	0.0123	0.0219	0.0131	0.0279	0.0265	0.0207	0.0326
PE	PE(18:2/22:6)	uM	0.4876	0.458	0.384	0.3208	0.3282	0.3694	0.8071	0.5075	1.9095	1.1275	0.7799	0.5616	0.5302	0.3584	0.3196	0.4418	0.3229	0.5101	0.4832	0.4864	0.4195
PE	PE(O16:0/16:0)	uM															0.0052
PE	PE(O16:0/18:1)	uM										0.0059					0.0042	0.004
PE	PE(O16:0/18:2)	uM	0.0162	0.0193	0.0181	0.0167	0.0155	0.03	0.0202	0.0232	0.0409	0.0284	0.0278	0.0194	0.026	0.0122	0.0163	0.0202	0.0139	0.0143	0.0156	0.0137	0.0169
PE	PE(O16:0/20:1)	uM						0.0144		0.0109								0.0068
PE	PE(O16:0/20:3)	uM
PE	PE(O16:0/20:4)	uM	0.0273		0.0153	0.0182	0.0195	0.0326	0.0143	0.0242		0.0275		0.0218	0.0291			0.025	0.0128	0.0154		0.0192	0.0211
PE	PE(O16:0/22:4)	uM
PE	PE(O16:0/22:5)	uM	0.0146											0.0208
PE	PE(O16:0/22:6)	uM	0.1512	0.1068	0.0515	0.0831	0.0783	0.1023	0.1418	0.0915	0.1183	0.0893	0.0839	0.1407	0.1293	0.0862	0.0964	0.085	0.069	0.1267	0.0974	0.1114	0.1003
PE	PE(O18:0/16:0)	uM												0.0082	0.0068			0.0063
PE	PE(O18:0/16:1)	uM
PE	PE(O18:0/18:0)	uM	0.0057				0.0035			0.0072				0.0071			0.004		0.0039		0.0063
PE	PE(O18:0/18:1)	uM	0.0142	0.0196	0.0118	0.0134	0.0129	0.0238	0.0135	0.0178	0.0211	0.0196	0.0204	0.0189	0.0182	0.015	0.0138	0.0139	0.0134	0.011	0.0101	0.0074	0.0138
PE	PE(O18:0/18:2)	uM	0.1792	0.1897	0.1796	0.1505	0.1391	0.2636	0.2659	0.2023	0.4037	0.252	0.3104	0.2333	0.2171	0.1779	0.1872	0.1723	0.1672	0.1672	0.1667	0.1536	0.1734
PE	PE(O18:0/18:3)	uM									0.0149	0.0105
PE	PE(O18:0/20:1)	uM	0.0037		0.0038			0.032		0.0169								0.0131
PE	PE(O18:0/20:2)	uM
PE	PE(O18:0/20:3)	uM	0.0215	0.0192	0.0131	0.0182	0.0193	0.0169	0.0159	0.0133	0.0212	0.0229	0.0187	0.0264	0.0212	0.0149	0.0159	0.0139	0.0158	0.0187	0.0164	0.0142	0.013
PE	PE(O18:0/20:4)	uM	0.4804	0.4461	0.3186	0.3416	0.3892	0.4263	0.466	0.3621	0.6332	0.5456	0.5138	0.4501	0.5508	0.3217	0.362	0.3872	0.3264	0.3367	0.3831	0.303	0.3553
PE	PE(O18:0/20:5)	uM	0.0499	0.0396	0.052	0.0456	0.0439		0.0467	0.0545	0.0506	0.0502	0.0676	0.0652	0.0522	0.0433	0.0515	0.0345	0.0431	0.0348	0.0478	0.0304	0.044
PE	PE(O18:0/22:4)	uM
PE	PE(O18:0/22:5)	uM	0.0362	0.0208	0.0181	0.0303	0.0223	0.0292	0.0272	0.0253	0.0495	0.0294	0.03	0.0379	0.0394	0.0239	0.0124	0.0294	0.017	0.0242	0.0221	0.0221	0.033
PE	PE(O18:0/22:6)	uM	0.6904	0.5292	0.3497	0.4205	0.4168	0.5427	0.7801	0.5563	0.8941	0.6978	0.6511	0.6418	0.769	0.4693	0.4399	0.5103	0.37	0.6668	0.4414	0.4259	0.4368
PE	PE(P14:0/18:0)	uM															0.0046	0.0066
PE	PE(P16:0/16:0)	uM	0.007	0.0089	0.0052	0.0114	0.0082	0.014	0.0089	0.0072		0.0107	0.0089	0.0109	0.01		0.0077	0.007		0.0055	0.0059	0.0092	0.0106
PE	PE(P16:0/18:0)	uM																	0.0037		0.0049
PE	PE(P16:0/18:1)	uM	0.0073	0.0095	0.0065	0.0095	0.0054	0.0147	0.0063	0.0093	0.0195	0.0104	0.0111		0.032			0.0055	0.0034		0.0091	0.0064	0.0068
PE	PE(P16:0/18:2)	uM	0.0273	0.0385	0.0289	0.0284	0.0219	0.0397	0.0237	0.0206	0.046	0.0287	0.0403	0.0239	0.0533	0.0249	0.021	0.0248	0.0255	0.0236	0.0312	0.0263	0.0354
PE	PE(P16:0/20:1)	uM		0.0119				0.0106							0.0066			0.0066	0.0043		0.008
PE	PE(P16:0/20:3)	uM	0.0062				0.0123				0.0123	0.0108		0.0127	0.0151					0.0077	0.0086
PE	PE(P16:0/20:4)	uM	0.0943	0.0914	0.0572	0.1224	0.1035	0.2158	0.0872	0.1088	0.2282	0.214	0.1347	0.1511	0.2363	0.1095	0.061	0.0901	0.0656	0.0867	0.0926	0.0833	0.0961
PE	PE(P16:0/20:5)	uM									0.0239		0.036		0.0286
PE	PE(P16:0/22:4)	uM	0.0252	0.0274		0.0291	0.0323	0.065	0.0163	0.0281	0.0509	0.0451	0.025	0.0467	0.0505	0.0203	0.0142	0.0238	0.0138	0.0262	0.0269	0.0213
PE	PE(P16:0/22:5)	uM	0.0406	0.0346	0.0169	0.0383	0.0295	0.0593	0.0216	0.0285	0.1142	0.047	0.0427	0.0547	0.0608	0.0362	0.0165	0.0281	0.0194	0.0379	0.0399	0.0266	0.0427
PE	PE(P16:0/22:6)	uM	0.3143	0.2563	0.2271	0.2046	0.1786	0.284	0.2769	0.1993	0.4142	0.3431	0.2952	0.2888	0.3078	0.2552	0.164	0.2076	0.1618	0.3256	0.2676	0.2314	0.2155
PE	PE(P16:1/18:1)	uM															0.0035
PE	PE(P18:0/16:0)	uM	0.0072				0.0077		0.0057	0.0069		0.0076	0.0079	0.0078	0.0068	0.0061					0.0033
PE	PE(P18:0/16:1)	uM
PE	PE(P18:0/18:0)	uM															0.0039
PE	PE(P18:0/18:1)	uM	0.0121	0.0122	0.0069	0.0099	0.0066	0.0124	0.0096	0.0102	0.0191	0.0182	0.0191	0.0127	0.0215	0.0084	0.0051	0.0064	0.0079	0.0071	0.0095	0.0092	0.008
PE	PE(P18:0/18:2)	uM	0.0725	0.1019	0.0701	0.0553	0.0541	0.0775	0.0674	0.046	0.1163	0.1065	0.1031	0.0587	0.0772	0.0603	0.0675	0.0705	0.0612	0.0617	0.0842	0.0669	0.0615
PE	PE(P18:0/18:3)	uM
PE	PE(P18:0/20:1)	uM		0.0104	0.005			0.0121										0.0076	0.0043		0.0069	0.0054
PE	PE(P18:0/20:2)	uM
PE	PE(P18:0/20:3)	uM	0.0091	0.0101		0.0093	0.0091	0.0165			0.0131	0.0116		0.0114	0.0175			0.0047	0.0061		0.0072
PE	PE(P18:0/20:4)	uM	0.1581	0.1444	0.0781	0.1134	0.1414	0.2516	0.1122	0.1043	0.2126	0.2358	0.2103	0.1791	0.2338	0.1203	0.0847	0.1157	0.0761	0.1169	0.1082	0.1039	0.115
PE	PE(P18:0/20:5)	uM	0.0174			0.0212													0.0331
PE	PE(P18:0/22:4)	uM	0.0252	0.02	0.0119	0.0182	0.0226	0.0405	0.0217	0.0204	0.0306	0.0309		0.0333	0.0391			0.0185	0.011	0.0179	0.0143		0.0219
PE	PE(P18:0/22:5)	uM	0.0509	0.034	0.0179	0.0293	0.0324	0.0476	0.0229	0.0267	0.0614	0.0347	0.0458	0.0501	0.0402	0.0307	0.0195	0.0206	0.0242	0.035	0.0306	0.0232	0.0316
PE	PE(P18:0/22:6)	uM	0.6388	0.5541	0.3348	0.3252	0.3627	0.4585	0.4266	0.3143	0.6045	0.5282	0.4276	0.4702	0.4916	0.395	0.3674	0.444	0.3377	0.5512	0.4887	0.3947	0.4149
PE	PE(P18:1/16:0)	uM	0.0054				0.0038															0.0052
PE	PE(P18:1/18:1)	uM			0.0053	0.0071	0.0063	0.011	0.0069	0.0061	0.0089				0.0096		0.0063	0.005	0.0068	0.0067	0.0078		0.008
PE	PE(P18:1/18:2)	uM	0.0541	0.0517	0.0425	0.0488	0.0322	0.0428	0.0631	0.0452	0.0627	0.0524	0.0471	0.0428	0.0407	0.0433	0.0367	0.0393	0.0299	0.0504	0.0601	0.0357	0.0438
PE	PE(P18:1/20:3)	uM
PE	PE(P18:1/20:4)	uM	0.0321	0.0377	0.02	0.0236	0.0398	0.0687	0.0257	0.0346	0.0608	0.075	0.0551	0.0429	0.0693	0.0392	0.015	0.0341	0.0214	0.0303	0.029	0.0228	0.034
PE	PE(P18:1/20:5)	uM
PE	PE(P18:1/22:4)	uM						0.0293				0.0253		0.0265	0.0235						0.0119
PE	PE(P18:1/22:5)	uM	0.0156			0.0138	0.0108		0.0098		0.0316	0.0159		0.026	0.0161	0.0145		0.0068			0.0177	0.0139
PE	PE(P18:1/22:6)	uM	0.0756	0.0618	0.0575	0.0548	0.058	0.1047	0.1069	0.0583	0.1229	0.1056	0.0878	0.137	0.1144	0.0821	0.0464	0.0531	0.0399	0.0933	0.0646	0.0728	0.071
PE	PE(P18:2/18:2)	uM
PE	PE(P18:2/20:4)	uM
PI	PI(16:0/16:0)	uM		0.007						0.0089			0.0111	0.0127		0.0066		0.0053			0.0051
PI	PI(16:0/16:1)	uM
PI	PI(16:0/18:1)	uM	0.017	0.0177	0.0079	0.0105	0.0106	0.0156	0.0085	0.0146	0.0095	0.0253	0.0179	0.0351	0.0177	0.0064	0.008	0.0068	0.0098	0.0086	0.006	0.0096	0.0145
PI	PI(16:0/18:2)	uM	0.2169	0.2494	0.1362	0.1221	0.1284	0.1848	0.1364	0.1767	0.2004	0.2848	0.1879	0.5253	0.2329	0.1109	0.1236	0.1321	0.1203	0.1453	0.1372	0.1264	0.1527
PI	PI(16:0/20:3)	uM	0.1701	0.0997	0.0659	0.0507	0.0644	0.0402	0.0387	0.0359	0.0454	0.0617	0.0417	0.0934	0.0562	0.0408	0.0566	0.0347	0.0751	0.0746	0.0504	0.0549	0.0524
PI	PI(16:0/20:4)	uM	0.9063	0.5296	0.371	0.3566	0.3909	0.4868	0.5537	0.4125	0.5839	0.6237	0.3877	0.8523	0.5729	0.3134	0.3671	0.4604	0.5632	0.3689	0.4201	0.4184	0.432
PI	PI(16:0/22:4)	uM	0.0156
PI	PI(16:0/22:5)	uM	0.0251		0.0123	0.0118	0.0091			0.0089				0.0219			0.0139	0.0094			0.0112	0.0096
PI	PI(16:0/22:6)	uM	0.0968	0.0706	0.0375	0.028	0.0508		0.0561	0.0572		0.0597		0.0577	0.0544	0.0472	0.0366	0.0414	0.039	0.0441	0.0402	0.0445	0.0425
PI	PI(18:0/16:0)	uM	0.0319	0.0397	0.0192	0.0277	0.0257	0.0403	0.0308	0.0329	0.0331	0.0384	0.0347	0.0528	0.0436	0.0198	0.017	0.0221	0.0236	0.0304	0.023	0.019	0.0285
PI	PI(18:0/16:1)	uM
PI	PI(18:0/18:1)	uM	0.0098	0.0165	0.0089	0.0093	0.0059	0.0107	0.0074	0.0084	0.0119	0.0188	0.0116	0.0152	0.0128		0.0084		0.007	0.0065	0.0073	0.0043
PI	PI(18:0/18:2)	uM	0.1929	0.3399	0.1779	0.1758	0.1827	0.2094	0.135	0.2069	0.3461	0.3979	0.3673	0.5259	0.2574	0.1049	0.1478	0.1426	0.1172	0.1338	0.1141	0.0849	0.1412
PI	PI(18:0/18:3)	uM	0.0099	0.0132
PI	PI(18:0/20:2)	uM	0.02	0.0258	0.0198	0.0162	0.0158	0.0172	0.0116	0.0106	0.0136	0.0134	0.023	0.0211	0.0136		0.021	0.0118	0.0127	0.0147	0.0123	0.0149	0.0147
PI	PI(18:0/20:3)	uM	0.6804	0.5981	0.4004	0.3644	0.4603	0.2954	0.2446	0.2389	0.2608	0.3031	0.373	0.629	0.3615	0.2315	0.3526	0.2027	0.3445	0.3732	0.3099	0.247	0.3075
PI	PI(18:0/20:4)	uM	7.8286	7.7655	5.592	4.6376	5.9177	7.1694	5.9275	5.5493	6.1272	5.1019	6.3833	9.6242	7.4578	4.1965	5.2619	5.9549	6.131	4.7543	5.2716	4.4113	5.3951
PI	PI(18:0/20:5)	uM	0.1645	0.1055	0.1435	0.0851	0.098	0.1169	0.1043	0.1849	0.1277	0.0844	0.1701	0.2977	0.1247	0.0649	0.1401	0.1032	0.1114	0.0703	0.1046	0.0403	0.08
PI	PI(18:0/22:4)	uM	0.0333	0.0384	0.0195	0.0166	0.0324	0.018	0.023	0.02	0.023	0.0215	0.0258	0.0313	0.0288	0.0188	0.0222	0.0291	0.0198	0.0178	0.0172	0.0159	0.0292
PI	PI(18:0/22:5)	uM	0.0447	0.0314	0.0217	0.0332	0.0246	0.0299	0.0188	0.0252	0.046	0.0181	0.0314	0.0477	0.0358	0.021	0.0267	0.0238	0.0201	0.0222	0.0317	0.0187	0.0256
PI	PI(18:0/22:6)	uM	0.2185	0.1756	0.1194	0.1075	0.1316	0.0563	0.1531	0.1088	0.1128	0.1087	0.0948	0.2012	0.158	0.1019	0.1091	0.0937	0.1006	0.124	0.1056	0.0702	0.1268
PI	PI(18:1/16:1)	uM	0.0139	0.0164	0.0059	0.0099	0.0075	0.0088	0.0071	0.0071	0.0177	0.0286	0.0129	0.0159	0.0114	0.0062	0.0074	0.0042	0.0089	0.0088	0.0093	0.0079	0.0124
PI	PI(18:1/18:1)	uM	0.0197	0.033	0.0136	0.0115	0.0158	0.0152	0.0076	0.0127	0.0252	0.0458	0.0223	0.0251	0.0126	0.0099	0.0148	0.0118	0.0182	0.0139	0.0183	0.0141	0.0152
PI	PI(18:1/18:2)	uM	0.0982	0.1893	0.0944	0.0654	0.0744	0.0708	0.0486	0.0595	0.1421	0.2136	0.1241	0.1211	0.0682	0.0435	0.0708	0.0735	0.0914	0.0736	0.0913	0.0615	0.0822
PI	PI(18:1/20:3)	uM	0.0614	0.0442	0.0326	0.025	0.032		0.0121	0.0101	0.0182	0.0499	0.0191	0.02	0.0131	0.0146	0.0269	0.0122	0.0376	0.0223	0.0242	0.0225	0.0172
PI	PI(18:1/20:4)	uM	0.4307	0.3542	0.2291	0.2123	0.2623	0.1531	0.2198	0.1399	0.3983	0.6344	0.2484	0.2269	0.2252	0.1472	0.242	0.226	0.3565	0.1735	0.2315	0.2235	0.2186
PI	PI(18:2/18:2)	uM	0.0166	0.0391	0.0249	0.0183	0.0174	0.0168	0.0077	0.0131	0.0475	0.053	0.0275	0.0275	0.0162	0.0126	0.0195	0.0204	0.0235	0.0155	0.0256	0.0172	0.0191
SM	SM(14:0)	uM	0.0157	0.0166	0.0103	0.0138	0.0149	0.0315	0.0113	0.0327	0.0384	0.024	0.037	0.028	0.0319	0.0132	0.0098	0.0197	0.012	0.0154	0.0215	0.0152	0.0215
SM	SM(16:0)	uM	1.3778	1.516	1.0199	1.5722	1.4522	3.4148	1.8462	3.1009	2.7496	2.1742	3.1258	3.2503	3.9547	1.7591	1.0452	2.0796	1.5047	2.0588	2.4658	1.7693	2.0848
SM	SM(18:0)	uM	0.0779	0.1144	0.0641	0.122	0.1191	0.6627	0.1721	0.6157	0.4251	0.1536	0.6581	0.3906	0.5145	0.1797	0.0623	0.1791	0.0938	0.1636	0.2298	0.1019	0.1587
SM	SM(18:1)	uM	0.0041	0.0057	0.0034	0.0064	0.006	0.0153	0.0072	0.0141	0.0202	0.0107	0.0227	0.0136	0.0144	0.0057	0.0039	0.0075	0.0048	0.0058	0.0078	0.0056	0.0059
SM	SM(20:0)	uM	1.5622	1.4634	1.0444	1.4249	1.4056	3.1004	2.127	3.1549	2.5354	2.5544	3.0386	3.819	3.3892	1.7382	1.3472	1.8676	1.1722	1.7926	1.8899	2.1481	1.7204
SM	SM(20:1)	uM	0.0496	0.0505	0.0299	0.0426	0.0474	0.0891	0.0509	0.1023	0.1109	0.1322	0.1248	0.1256	0.1001	0.0418	0.04	0.0516	0.0318	0.0448	0.048	0.0594	0.0433
SM	SM(22:0)	uM	5.2248	5.3733	3.6847	4.8383	4.6968	6.8175	5.2489	6.0582	6.4225	5.684	6.0914	8.2488	6.4929	4.5804	4.0579	4.5433	4.0037	5.7132	5.586	5.0263	5.3762
SM	SM(22:1)	uM	0.628	0.7184	0.436	0.671	0.6412	0.8311	0.5527	0.9096	0.9457	1.2366	1.0958	1.2085	0.8766	0.4569	0.4715	0.5491	0.4887	0.5743	0.6293	0.6152	0.6236
SM	SM(24:0)	uM	3.08	2.6054	1.7586	2.5291	2.4448	2.9444	2.7389	2.7015	3.1078	3.1076	2.812	3.5567	3.0606	2.269	2.0216	2.0692	2.2829	2.9681	2.7019	2.6929	2.6972
SM	SM(24:1)	uM	3.1108	3.3309	2.1496	3.5023	3.3922	3.7919	2.764	3.2434	3.2856	4.1559	3.6525	4.6788	3.8734	2.2017	2.3184	2.9955	2.4812	3.125	3.2128	2.7683	3.4704
SM	SM(26:0)	uM	0.0189	0.0207	0.0147	0.0166	0.019	0.0261	0.0168	0.0198	0.0235	0.0244	0.0222	0.0233	0.0208	0.0188	0.0153	0.0186	0.0144	0.0183	0.0186	0.0206	0.0184
SM	SM(26:1)	uM	0.0247	0.0207	0.0172	0.0239	0.0199	0.0296	0.0161	0.0246	0.0281	0.0226	0.0282	0.0278	0.0244	0.0194	0.018	0.0216	0.0175	0.0177	0.024	0.0201	0.0281
TAG	TAG36:0FA12:0	uM	0.0015	0.0082	0.0013	0.0022	0.0018	0.0037	0.0017	0.0055	0.0043	0.002	0.0034	0.0028	0.0038	0.0019	0.0019	0.0021	0.0011	0.0016	0.0017	0.005	0.0016
TAG	TAG38:0FA12:0	uM	0.002	0.0072	0.001	0.0022	0.0021	0.0056	0.0019	0.0049	0.0044	0.0032	0.0045	0.0032	0.0037	0.002	0.0022	0.0031	0.0014	0.0017	0.0017	0.005	0.0021
TAG	TAG40:0FA12:0	uM		0.003	0.0009	0.0011	0.001			0.0038	0.0023		0.0024		0.0027	0.0022	0.001	0.0015	0.0009	0.0009	0.0012	0.0023	0.0013
TAG	TAG40:0FA14:0	uM	0.0015	0.0035	0.0009	0.002	0.0014	0.0048	0.0016	0.0046	0.0036	0.0029	0.0036	0.0038	0.0039	0.0026	0.0018	0.0018	0.0013	0.0018	0.0015	0.003	0.0021
TAG	TAG40:0FA16:0	uM		0.0041	0.0009	0.0014	0.0015	0.0046	0.0014	0.0045	0.0031	0.0021	0.0043	0.0029	0.0041	0.0019	0.0013	0.002	0.0008		0.0017	0.0032	0.0023
TAG	TAG42:0FA12:0	uM		0.0023						0.0036	0.0028	0.0016	0.0046	0.0025	0.0031	0.0028	0.0008	0.0011				0.0026
TAG	TAG42:0FA14:0	uM		0.0022	0.0009			0.0045	0.0014	0.005	0.0039	0.0028	0.0051	0.0033	0.0041	0.0062		0.0015	0.0008		0.0013	0.0021	0.0011
TAG	TAG42:0FA16:0	uM	0.0018	0.0076	0.0017	0.0025	0.0025	0.0146	0.0022	0.0105	0.0092	0.0055	0.0149	0.0124	0.013	0.0054	0.0022	0.0035	0.0017	0.0022	0.0031	0.0078	0.0035
TAG	TAG42:1FA12:0	uM		0.0013			0.0009	0.0033	0.001	0.0034	0.0049	0.0017	0.0041	0.0027	0.0036	0.0024		0.0011			0.0011		0.001
TAG	TAG42:1FA14:0	uM				0.0008		0.0045		0.0039	0.003	0.0025	0.0048	0.0038	0.0037	0.0032						0.0017
TAG	TAG42:1FA16:0	uM	0.0013	0.0031	0.001	0.0018	0.0016	0.0169	0.0024	0.0148	0.0099	0.0059	0.0144	0.0136	0.0145	0.0035	0.0013	0.0035	0.001	0.0013	0.0021	0.0047	0.0026
TAG	TAG42:1FA16:1	uM	0.002	0.0031	0.0023	0.0025	0.0021	0.0077	0.0014	0.0077	0.0055	0.0051	0.0087	0.0071	0.0067	0.0052	0.0022	0.0026	0.0018	0.002	0.0025	0.0049	0.003
TAG	TAG42:1FA18:1	uM	0.014	0.0168	0.0119	0.0143	0.0117	0.0315	0.0173	0.0431	0.0397	0.0319	0.0454	0.0437	0.0432	0.0267	0.0139	0.0152	0.0135	0.0154	0.0193	0.0255	0.0202
TAG	TAG42:2FA12:0	uM		0.0012			0.0011	0.0029	0.0008	0.0031	0.0049	0.002	0.005	0.0031	0.004	0.001	0.0008	0.0009	0.0008				0.0012
TAG	TAG42:2FA18:2	uM	0.0011	0.0026	0.0015	0.0019	0.0019	0.0122	0.0029	0.0208	0.0156	0.0068	0.0167	0.0151	0.0173	0.0035	0.0016	0.0032	0.0016	0.0017	0.0026	0.005	0.0033
TAG	TAG44:0FA12:0	uM	0.0015	0.0029	0.001	0.0012	0.0014	0.0114	0.0018	0.0119	0.0099	0.0041	0.013	0.0083	0.0108	0.0039	0.0011	0.0024	0.0013	0.0017	0.0018	0.0038	0.0018
TAG	TAG44:0FA14:0	uM	0.0012	0.0026		0.0021	0.001	0.0137	0.0019	0.0122	0.0114	0.0083	0.0197	0.0124	0.0125	0.0149		0.0026		0.0009	0.002	0.0041	0.0019
TAG	TAG44:0FA16:0	uM	0.0016	0.0061	0.0016	0.0018	0.0026	0.034	0.0042	0.0304	0.026	0.0115	0.0428	0.0291	0.0375	0.0157	0.002	0.0057	0.0013	0.002	0.0041	0.0092	0.0045
TAG	TAG44:0FA18:0	uM	0.0402	0.0595	0.0411	0.0509	0.0368	0.1412	0.0318	0.1394	0.0729	0.0715	0.1183	0.0851	0.0777	0.0545	0.0632	0.0561	0.0488	0.0458	0.0495	0.1039	0.0509
TAG	TAG44:1FA12:0	uM	0.0009	0.0012	0.0008	0.0012	0.001	0.0195	0.0021	0.0165	0.0203	0.0081	0.0289	0.0132	0.0193	0.0034	0.0009	0.0018	0.0008		0.0017	0.0046	0.0017
TAG	TAG44:1FA14:0	uM	0.0009		0.0007		0.0009	0.0171	0.0022	0.0153	0.0185	0.0099	0.028	0.0122	0.0147	0.0105		0.0019	0.0009		0.0018	0.0039	0.0013
TAG	TAG44:1FA14:1	uM		0.0016	0.0007		0.001	0.0052	0.0013	0.0052	0.0043	0.0022	0.0059	0.0045	0.0054	0.0039	0.0007	0.0011	0.0008	0.0011	0.001	0.0016	0.0015
TAG	TAG44:1FA16:0	uM	0.0029	0.0061	0.0023	0.0062	0.005	0.0817	0.0084	0.0612	0.0422	0.0219	0.0724	0.0732	0.0702	0.0123	0.0033	0.0118	0.0017	0.0036	0.0066	0.0246	0.0093
TAG	TAG44:1FA16:1	uM	0.0018	0.0022	0.0012	0.0014	0.0014	0.0139	0.0019	0.0126	0.0118	0.0101	0.0219	0.0128	0.0161	0.0111	0.0017	0.0025	0.0016	0.0016	0.0019	0.0052	0.0019
TAG	TAG44:1FA18:1	uM	0.0052	0.0089	0.0038	0.0082	0.0072	0.0518	0.0085	0.042	0.0329	0.019	0.049	0.0451	0.0426	0.0111	0.0054	0.0101	0.0043	0.0053	0.0081	0.0176	0.0091
TAG	TAG44:2FA12:0	uM		0.0008		0.0012	0.0009	0.0164	0.0023	0.0203	0.0269	0.0074	0.0354	0.0143	0.0207	0.0024	0.0006	0.0027			0.001	0.0043	0.0015
TAG	TAG44:2FA14:0	uM	0.0009			0.0009	0.0012	0.0177	0.0035	0.0217	0.0296	0.0077	0.0357	0.0125	0.0196	0.0036	0.0007	0.0024	0.0007	0.0007	0.0015	0.0038	0.0016
TAG	TAG44:2FA16:0	uM	0.0035	0.0064	0.0031	0.0075	0.0072	0.1188	0.0127	0.1053	0.0607	0.0247	0.1056	0.0965	0.1163	0.0141	0.0034	0.0166	0.0025	0.0041	0.0092	0.0314	0.0129
TAG	TAG44:2FA16:1	uM	0.001	0.0021	0.0011	0.0015	0.0014	0.0172	0.0016	0.0134	0.0121	0.0092	0.0184	0.015	0.0145	0.0056	0.0013	0.0024	0.0013	0.0014	0.0019	0.0054	0.0024
TAG	TAG44:2FA18:1	uM	0.0066	0.0082	0.0049	0.0071	0.0071	0.0383	0.0088	0.0328	0.0233	0.0147	0.0286	0.032	0.0318	0.011	0.0058	0.0086	0.005	0.008	0.0076	0.0133	0.0081
TAG	TAG44:2FA18:2	uM	0.0082	0.0107	0.009	0.0123	0.0101	0.1046	0.0179	0.0976	0.0746	0.0358	0.1093	0.099	0.1013	0.019	0.0097	0.0209	0.0069	0.0082	0.0168	0.0352	0.0163
TAG	TAG44:3FA18:2	uM	0.0013	0.0027	0.0012	0.0019	0.0018	0.0393	0.0056	0.0414	0.0332	0.0107	0.047	0.0343	0.044	0.0053	0.0016	0.0061	0.001	0.0019	0.0028	0.0097	0.0043
TAG	TAG45:0FA14:0	uM		0.0012				0.004		0.0027	0.0024	0.0032	0.004	0.0038	0.0024	0.011						0.0019	0.001
TAG	TAG45:0FA15:0	uM	0.0009	0.0015		0.0009		0.0053	0.0009	0.0035	0.003	0.0041	0.0048	0.0036	0.0024	0.0124		0.0012			0.0015	0.0024	0.001
TAG	TAG45:0FA16:0	uM	0.0026	0.0032	0.0016	0.0031	0.0027	0.0178	0.0022	0.0094	0.0072	0.0095	0.0147	0.0152	0.0153	0.0163	0.0018	0.0033	0.0016	0.0026	0.0064	0.0081	0.0036
TAG	TAG45:1FA15:0	uM	0.0011	0.0016	0.0008	0.0011	0.0009	0.0048	0.0013	0.0042	0.0039	0.0036	0.0061	0.0051	0.0062	0.0083	0.0008		0.0008	0.001	0.0016	0.0016	0.0011
TAG	TAG45:1FA16:0	uM	0.0038	0.0071	0.0032	0.0082	0.0069	0.0646	0.0044	0.0252	0.0177	0.016	0.0429	0.0495	0.0397	0.0125	0.0032	0.0102	0.0019	0.0045	0.0084	0.0194	0.01
TAG	TAG45:1FA18:1	uM	0.0029	0.0045	0.002	0.0052	0.0051	0.0366	0.0028	0.0161	0.0126	0.0097	0.0267	0.0324	0.024	0.0064	0.0018	0.0066	0.0018	0.0029	0.006	0.0149	0.006
TAG	TAG46:0FA12:0	uM	0.0009	0.0014	0.0007			0.0133	0.0018	0.0115	0.0098	0.0047	0.0155	0.0088	0.0096	0.0025		0.0015				0.0036
TAG	TAG46:0FA14:0	uM	0.003	0.0068	0.0012	0.0041	0.0035	0.0651	0.0057	0.0555	0.0391	0.0251	0.0877	0.0551	0.0603	0.0205	0.0021	0.0078	0.0018	0.0026	0.0049	0.0223	0.0075
TAG	TAG46:0FA16:0	uM	0.0057	0.0134	0.0029	0.0103	0.0092	0.1691	0.0157	0.138	0.089	0.0665	0.2073	0.1424	0.1564	0.0408	0.0038	0.0245	0.0032	0.008	0.0125	0.0558	0.0204
TAG	TAG46:0FA18:0	uM		0.0032	0.001	0.0011	0.001	0.0088	0.0022	0.0059	0.0064	0.0039	0.0082	0.0064	0.0075	0.0029	0.0012	0.0021	0.001	0.0009	0.0015	0.0024	0.0016
TAG	TAG46:1FA12:0	uM	0.005	0.0065	0.0024	0.0051	0.0054	0.1303	0.0209	0.1336	0.1072	0.0463	0.1955	0.1132	0.1423	0.0164	0.0027	0.0178	0.0023	0.0053	0.0071	0.0339	0.0105
TAG	TAG46:1FA14:0	uM	0.0044	0.0049	0.0011	0.0049	0.0036	0.0976	0.0078	0.0897	0.0854	0.0643	0.1804	0.0918	0.0928	0.0195	0.0018	0.0108	0.0016	0.003	0.0044	0.0281	0.0069
TAG	TAG46:1FA14:1	uM	0.0035	0.0038	0.0022	0.0034	0.0032	0.0234	0.0047	0.0222	0.0158	0.0104	0.0276	0.0193	0.021	0.0074	0.003	0.0055	0.0025	0.0038	0.0039	0.0094	0.0033
TAG	TAG46:1FA16:0	uM	0.0068	0.0124	0.0034	0.013	0.0121	0.2847	0.0354	0.2676	0.1929	0.1152	0.3815	0.2423	0.3175	0.0452	0.0047	0.0422	0.0035	0.0082	0.0143	0.0843	0.027
TAG	TAG46:1FA16:1	uM	0.0029	0.0041	0.0015	0.0039	0.0039	0.0641	0.0038	0.0613	0.0398	0.0444	0.0984	0.0627	0.0707	0.0278	0.0014	0.0078	0.0011	0.0024	0.0033	0.0251	0.0058
TAG	TAG46:1FA18:0	uM	0.001	0.0014	0.0007		0.0012	0.0065	0.0012	0.0053	0.005	0.0021	0.0067	0.006	0.0047	0.0019	0.0012	0.0016	0.0008	0.0012	0.0013	0.0027	0.0016
TAG	TAG46:1FA18:1	uM	0.0037	0.0066	0.0022	0.0053	0.0052	0.1553	0.0191	0.1394	0.1111	0.0517	0.1844	0.1213	0.1479	0.0191	0.0029	0.0191	0.0023	0.0053	0.0096	0.0363	0.0137
TAG	TAG46:2FA12:0	uM	0.0064	0.0122	0.0046	0.0121	0.0099	0.2766	0.0495	0.3256	0.264	0.0923	0.4446	0.2477	0.3475	0.0322	0.0061	0.0454	0.0049	0.0104	0.0179	0.0764	0.0275
TAG	TAG46:2FA14:0	uM	0.0026	0.0029	0.0011	0.0033	0.0027	0.1101	0.0092	0.0969	0.1252	0.067	0.211	0.0889	0.1086	0.0141	0.0015	0.0119	0.0012	0.0029	0.0036	0.0279	0.0084
TAG	TAG46:2FA14:1	uM	0.0013	0.0015	0.0012	0.0019	0.0013	0.029	0.0037	0.0277	0.0258	0.0182	0.0443	0.0276	0.0305	0.0063	0.0011	0.0036	0.0012	0.0015	0.0021	0.01	0.0022
TAG	TAG46:2FA16:0	uM	0.0043	0.0126	0.0038	0.0137	0.0132	0.4091	0.0669	0.4505	0.3426	0.1262	0.6072	0.3663	0.5036	0.0445	0.007	0.0677	0.0041	0.0101	0.0224	0.1129	0.0402
TAG	TAG46:2FA16:1	uM	0.0032	0.0035	0.0015	0.004	0.0039	0.0696	0.0071	0.0661	0.0624	0.0541	0.1058	0.0599	0.0679	0.021	0.0018	0.0081	0.0014	0.0017	0.0035	0.0244	0.0065
TAG	TAG46:2FA18:1	uM	0.0026	0.0061	0.0026	0.0067	0.0059	0.106	0.0105	0.0829	0.0826	0.0401	0.1133	0.0836	0.0824	0.0121	0.0032	0.0163	0.0024	0.0034	0.0075	0.0311	0.0104
TAG	TAG46:2FA18:2	uM	0.0082	0.0138	0.01	0.0155	0.0134	0.3259	0.0515	0.3757	0.3109	0.1115	0.5309	0.306	0.3964	0.042	0.01	0.0577	0.008	0.0134	0.0272	0.0954	0.0346
TAG	TAG46:3FA12:0	uM	0.0012	0.0024	0.0008	0.0017	0.0017	0.0572	0.0071	0.0612	0.0697	0.0267	0.1028	0.0551	0.0637	0.0059	0.0014	0.0077	0.0009	0.0014	0.0034	0.0153	0.005
TAG	TAG46:3FA14:0	uM		0.0014		0.0011		0.0199	0.0023	0.0215	0.0286	0.0109	0.0382	0.0164	0.0204	0.0025		0.002		0.0009	0.0013	0.006	0.0018
TAG	TAG46:3FA14:1	uM	0.0008	0.0015	0.0008	0.0016	0.0013	0.029	0.0026	0.0278	0.0372	0.0132	0.0454	0.0188	0.0228	0.0044	0.001	0.0029	0.0007	0.0013	0.0015	0.0061	0.0021
TAG	TAG46:3FA16:0	uM	0.0018	0.0064	0.0023	0.0061	0.0055	0.1246	0.0166	0.128	0.0759	0.028	0.136	0.1016	0.1433	0.0148	0.0036	0.0309	0.0014	0.004	0.0075	0.0391	0.0154
TAG	TAG46:3FA16:1	uM	0.0013	0.0027	0.0009	0.0018	0.0025	0.0754	0.0082	0.0864	0.0992	0.0384	0.131	0.0715	0.0849	0.0099	0.0009	0.0099	0.0012	0.0024	0.003	0.0193	0.0057
TAG	TAG46:3FA18:1	uM	0.0036	0.0066	0.0037	0.0053	0.0044	0.0696	0.0073	0.0478	0.0621	0.0204	0.063	0.0512	0.0527	0.01	0.0034	0.0108	0.0031	0.0041	0.0088	0.0186	0.0075
TAG	TAG46:3FA18:2	uM	0.0039	0.0083	0.005	0.0095	0.0082	0.1816	0.0232	0.1845	0.1656	0.0589	0.2228	0.1387	0.1893	0.0202	0.0048	0.0329	0.0041	0.0063	0.0117	0.0531	0.0194
TAG	TAG46:3FA18:3	uM	0.0011	0.0015	0.0009		0.0011	0.0171	0.0018	0.018	0.0127	0.0047	0.025	0.0173	0.0196	0.0022	0.001	0.003		0.0012	0.0017	0.004	0.0019
TAG	TAG46:4FA18:2	uM	0.003	0.0045	0.003	0.0055	0.0047	0.0803	0.0089	0.0759	0.0839	0.0224	0.0972	0.062	0.0709	0.0104	0.0026	0.0141	0.0027	0.0049	0.0094	0.0225	0.0092
TAG	TAG47:0FA14:0	uM						0.0027	0.0008	0.0029	0.0022	0.0028	0.0051	0.0032	0.0041	0.0048		0.0013				0.0011	0.001
TAG	TAG47:0FA15:0	uM	0.0027	0.0033	0.002	0.0026	0.003	0.0133	0.0027	0.0103	0.0069	0.0092	0.0168	0.0135	0.0139	0.0126	0.0023	0.0039	0.0024	0.0027	0.0031	0.0077	0.0039
TAG	TAG47:0FA16:0	uM	0.004	0.0072	0.0027	0.004	0.0038	0.0302	0.0053	0.022	0.0178	0.0153	0.0279	0.0289	0.0306	0.024	0.0033	0.0066	0.0025	0.0045	0.0057	0.0129	0.0073
TAG	TAG47:0FA17:0	uM	0.0039	0.0063	0.0036	0.0049	0.0049	0.0069	0.0043	0.006	0.0066	0.0103	0.0071	0.0081	0.0079	0.0082	0.0032	0.0043	0.0035	0.0041	0.0041	0.0053	0.0054
TAG	TAG47:1FA14:0	uM	0.0009	0.0013		0.0011	0.001	0.0118	0.0014	0.011	0.0108	0.009	0.0236	0.0121	0.0101	0.006		0.0019	0.0008	0.0011	0.0014	0.0046	0.002
TAG	TAG47:1FA15:0	uM	0.0014	0.0026	0.0009	0.0023	0.0018	0.0209	0.0024	0.0137	0.0144	0.0146	0.0303	0.0208	0.0195	0.0133	0.0008	0.0035	0.001	0.0013	0.002	0.0079	0.0028
TAG	TAG47:1FA16:0	uM	0.0025	0.0041	0.0017	0.0036	0.0033	0.0391	0.0056	0.0309	0.0278	0.0203	0.0629	0.0414	0.0385	0.0178	0.0022	0.0061	0.0018	0.0026	0.0039	0.0149	0.0064
TAG	TAG47:1FA16:1	uM	0.0147	0.0102	0.0077	0.0106	0.0086	0.0395	0.0076	0.0213	0.0208	0.0353	0.0356	0.0524	0.0365	0.0279	0.0081	0.0098	0.0071	0.0063	0.0113	0.0157	0.0087
TAG	TAG47:1FA17:0	uM	0.0027	0.0025	0.0017	0.0024	0.0025	0.0072	0.0021	0.0045	0.006	0.0053	0.0081	0.0067	0.006	0.0053	0.0016	0.0027	0.0019	0.0019	0.0024	0.0031	0.0028
TAG	TAG47:1FA18:1	uM	0.0021	0.0039	0.0016	0.0032	0.0036	0.0321	0.0047	0.0227	0.0213	0.0145	0.0442	0.0266	0.0247	0.0092	0.0026	0.0053	0.0017	0.0021	0.0067	0.0107	0.0044
TAG	TAG47:2FA14:0	uM	0.0011	0.0016		0.0011	0.0011	0.018	0.0022	0.0176	0.0167	0.012	0.035	0.0168	0.0193	0.004	0.001	0.0028		0.0011	0.0019	0.0062	0.0025
TAG	TAG47:2FA15:0	uM	0.0012	0.0015	0.0008	0.0012	0.0015	0.022	0.0029	0.02	0.0219	0.0129	0.0446	0.0205	0.0224	0.0056	0.0009	0.0024		0.0014	0.0024	0.0067	0.0023
TAG	TAG47:2FA16:1	uM	0.0018	0.0014	0.001	0.002	0.0014	0.0106	0.0018	0.0094	0.0124	0.0153	0.0231	0.0133	0.0119	0.0157	0.0012	0.0019	0.0015	0.0012	0.002	0.0057	0.0021
TAG	TAG47:2FA18:1	uM	0.0047	0.0065	0.0027	0.0045	0.0053	0.0427	0.0059	0.0216	0.0247	0.0174	0.043	0.0348	0.0273	0.0065	0.0029	0.0075	0.0026	0.0038	0.0072	0.0142	0.0078
TAG	TAG47:2FA18:2	uM	0.0022	0.0035	0.0019	0.0035	0.003	0.0521	0.009	0.0461	0.051	0.0251	0.0911	0.0475	0.0535	0.0101	0.0023	0.0081	0.0016	0.0029	0.0052	0.0164	0.0065
TAG	TAG48:0FA14:0	uM	0.003	0.0059	0.0009	0.0033	0.0036	0.0685	0.0077	0.0571	0.0457	0.0325	0.0916	0.0627	0.0567	0.0091	0.0017	0.009	0.0016	0.003	0.0042	0.0195	0.0075
TAG	TAG48:0FA16:0	uM	0.0362	0.0831	0.0189	0.0658	0.0564	0.8586	0.0916	0.7168	0.4151	0.3032	0.9212	0.8401	0.8365	0.1457	0.0258	0.1692	0.0194	0.0652	0.0894	0.3674	0.1542
TAG	TAG48:0FA18:0	uM	0.0022	0.0049	0.0011	0.0027	0.0024	0.0348	0.0043	0.0249	0.0183	0.0132	0.0379	0.0278	0.0269	0.0061	0.0012	0.0047	0.0012	0.0019	0.0033	0.0117	0.0046
TAG	TAG48:1FA12:0	uM		0.0016		0.0014	0.0015	0.0136	0.0027	0.011	0.0133	0.0045	0.0158	0.0129	0.01	0.0024		0.0023			0.0013	0.0039	0.0016
TAG	TAG48:1FA14:0	uM	0.0267	0.0419	0.0088	0.0339	0.0329	0.7661	0.0785	0.6594	0.4844	0.3548	1.0179	0.6991	0.7107	0.0739	0.0141	0.0952	0.009	0.0273	0.0385	0.2549	0.0757
TAG	TAG48:1FA14:1	uM		0.0015		0.0013	0.0011	0.0207	0.0032	0.0199	0.0141	0.007	0.0239	0.0193	0.0204	0.0034	0.001	0.0023		0.0009	0.0012	0.0064	0.0023
TAG	TAG48:1FA16:0	uM	0.0726	0.1216	0.0246	0.1041	0.0987	1.659	0.1406	1.4089	0.91	0.8376	2.1929	1.6156	1.6368	0.1719	0.0366	0.2348	0.023	0.0637	0.0933	0.6879	0.1964
TAG	TAG48:1FA16:1	uM	0.0224	0.0399	0.0072	0.0342	0.0273	0.3812	0.0249	0.3376	0.1899	0.2257	0.5211	0.409	0.4157	0.0555	0.0106	0.0633	0.0079	0.0173	0.0236	0.1819	0.0537
TAG	TAG48:1FA18:0	uM	0.0016	0.0027	0.0012	0.0018	0.0017	0.0293	0.0042	0.0247	0.0221	0.0098	0.0368	0.0273	0.0246	0.0055	0.0011	0.0039		0.0014	0.0025	0.0082	0.0028
TAG	TAG48:1FA18:1	uM	0.0323	0.0485	0.0096	0.0426	0.0378	0.8184	0.0695	0.6373	0.4266	0.3235	0.9402	0.6803	0.7128	0.0817	0.0149	0.1025	0.0121	0.0313	0.0446	0.27	0.0838
TAG	TAG48:2FA12:0	uM	0.0029	0.0065	0.0023	0.0058	0.0052	0.1164	0.0173	0.1002	0.1042	0.0333	0.1297	0.083	0.0983	0.0135	0.0025	0.0186	0.002	0.0047	0.0092	0.0326	0.0129
TAG	TAG48:2FA14:0	uM	0.038	0.0686	0.0173	0.066	0.0632	1.5806	0.1648	1.5515	1.2034	0.7866	2.5733	1.4253	1.7069	0.1461	0.0251	0.2073	0.0167	0.0563	0.0873	0.535	0.1608
TAG	TAG48:2FA14:1	uM	0.0049	0.0094	0.0031	0.0086	0.0075	0.2581	0.0358	0.2257	0.1685	0.0969	0.3024	0.1959	0.265	0.0245	0.0053	0.0302	0.0029	0.0061	0.0085	0.0719	0.0164
TAG	TAG48:2FA16:0	uM	0.0525	0.0975	0.0217	0.0929	0.0877	2.0788	0.1964	1.9782	1.487	1.007	3.1602	1.9219	2.1978	0.1949	0.0343	0.2821	0.0221	0.072	0.1107	0.7267	0.2214
TAG	TAG48:2FA16:1	uM	0.0362	0.0452	0.0069	0.0423	0.0391	0.5427	0.0283	0.5031	0.364	0.5158	0.8958	0.588	0.5892	0.0581	0.0128	0.0724	0.0077	0.0158	0.0209	0.2504	0.05
TAG	TAG48:2FA18:0	uM	0.0011	0.0021	0.0013	0.0018	0.0018	0.0348	0.0057	0.0294	0.0326	0.0082	0.0394	0.0261	0.0259	0.005	0.0013	0.0042	0.0009	0.0017	0.0031	0.0083	0.0035
TAG	TAG48:2FA18:1	uM	0.0187	0.0267	0.0066	0.0308	0.0269	0.6174	0.0623	0.4874	0.4297	0.2713	0.7257	0.4909	0.5334	0.0546	0.0109	0.0779	0.0063	0.0183	0.0293	0.1897	0.055
TAG	TAG48:2FA18:2	uM	0.0367	0.0717	0.0164	0.0644	0.063	1.5151	0.1539	1.4795	1.031	0.6343	2.2617	1.3995	1.546	0.1439	0.0251	0.219	0.0164	0.0589	0.0862	0.5095	0.1776
TAG	TAG48:3FA12:0	uM	0.0027	0.0063	0.0026	0.0105	0.0096	0.2919	0.036	0.2429	0.2588	0.0646	0.3056	0.1992	0.2416	0.0258	0.0042	0.0413	0.0023	0.0094	0.0183	0.0764	0.0299
TAG	TAG48:3FA14:0	uM	0.0121	0.0189	0.0037	0.0181	0.0173	0.3982	0.0284	0.3972	0.3795	0.2779	0.7507	0.381	0.4061	0.0288	0.0062	0.0511	0.004	0.0108	0.0143	0.1317	0.034
TAG	TAG48:3FA14:1	uM	0.0067	0.0156	0.0057	0.0157	0.0155	0.5087	0.0822	0.5573	0.4379	0.2017	0.7007	0.4328	0.5715	0.0553	0.0092	0.0683	0.0057	0.013	0.0185	0.1553	0.0394
TAG	TAG48:3FA16:0	uM	0.0072	0.0156	0.005	0.0154	0.0164	0.4872	0.059	0.4876	0.368	0.1831	0.68	0.4232	0.5627	0.0434	0.0079	0.0688	0.0045	0.0121	0.0171	0.1558	0.0426
TAG	TAG48:3FA16:1	uM	0.0172	0.0271	0.0049	0.0253	0.0244	0.47	0.0335	0.478	0.4868	0.4231	0.9542	0.505	0.4949	0.0426	0.0083	0.0578	0.0056	0.0118	0.018	0.1714	0.0426
TAG	TAG48:3FA18:1	uM	0.0057	0.015	0.004	0.0155	0.0149	0.4658	0.0561	0.4133	0.4673	0.1345	0.5918	0.3433	0.4125	0.0492	0.008	0.0688	0.0037	0.0153	0.027	0.1235	0.0462
TAG	TAG48:3FA18:2	uM	0.0162	0.0367	0.0098	0.0398	0.0356	0.9921	0.108	0.9406	0.8263	0.4093	1.4003	0.7997	0.9851	0.0869	0.0172	0.1453	0.0085	0.0277	0.0492	0.3062	0.0936
TAG	TAG48:3FA18:3	uM	0.0027	0.004	0.0016	0.004	0.0042	0.083	0.0042	0.0737	0.0469	0.0252	0.1135	0.0654	0.084	0.0066	0.0017	0.0098	0.0014	0.004	0.0042	0.0269	0.0089
TAG	TAG48:4FA12:0	uM	0.0027	0.0057	0.0023	0.008	0.0063	0.1948	0.0272	0.1844	0.2028	0.0397	0.2222	0.1309	0.1962	0.0215	0.0034	0.0359	0.0026	0.0082	0.0148	0.0569	0.0246
TAG	TAG48:4FA14:0	uM	0.0019	0.0025		0.0022	0.0019	0.0566	0.0048	0.0575	0.0723	0.0272	0.1156	0.053	0.0586	0.0048	0.001	0.0073	0.0007	0.002	0.0027	0.0186	0.0054
TAG	TAG48:4FA14:1	uM	0.0014	0.0033	0.001	0.003	0.0019	0.082	0.0096	0.0931	0.1048	0.0515	0.15	0.0744	0.0933	0.0068	0.0014	0.0104	0.0009	0.002	0.003	0.0251	0.0064
TAG	TAG48:4FA16:0	uM	0.0019	0.0038	0.0017	0.0034	0.0033	0.1098	0.02	0.1301	0.1019	0.0384	0.1658	0.095	0.137	0.0121	0.0022	0.0157	0.0017	0.0032	0.005	0.0294	0.0092
TAG	TAG48:4FA16:1	uM	0.0021	0.0035	0.0013	0.0038	0.0034	0.0822	0.0079	0.0965	0.105	0.0599	0.1651	0.0821	0.0991	0.0081	0.0018	0.0103	0.0011	0.0021	0.0026	0.029	0.0065
TAG	TAG48:4FA18:1	uM	0.0019	0.0049	0.0027	0.0044	0.0041	0.0913	0.0108	0.0837	0.0911	0.0288	0.101	0.0622	0.0808	0.0112	0.0029	0.0146	0.0026	0.0045	0.0062	0.0249	0.0126
TAG	TAG48:4FA18:2	uM	0.0075	0.0205	0.0103	0.0251	0.0231	0.5973	0.0829	0.5814	0.6513	0.1567	0.7829	0.4416	0.6412	0.0672	0.0123	0.1098	0.0079	0.0243	0.0455	0.1792	0.0727
TAG	TAG48:4FA18:3	uM	0.0025	0.0028	0.0012	0.0027	0.0032	0.0662	0.0051	0.0631	0.0578	0.0249	0.102	0.0529	0.0785	0.0049	0.0016	0.0089	0.0011	0.0026	0.004	0.0233	0.0069
TAG	TAG48:4FA20:4	uM	0.0017	0.0019	0.0016	0.0021	0.0017	0.0118	0.0037	0.0116	0.0082	0.0052	0.0129	0.0151	0.0131	0.0027	0.0016	0.0022	0.0017	0.0014	0.0024	0.0048	0.0021
TAG	TAG48:5FA18:2	uM	0.0022	0.0042	0.0022	0.0041	0.0039	0.1017	0.0103	0.1108	0.1274	0.0285	0.1459	0.0778	0.1073	0.0097	0.0031	0.0224	0.0018	0.0054	0.0074	0.0312	0.0136
TAG	TAG48:5FA18:3	uM	0.0016	0.0025	0.0015	0.0023	0.0028	0.0453	0.0046	0.0489	0.0493	0.0136	0.0762	0.0388	0.0566	0.0052	0.0017	0.0097	0.0013	0.0022	0.0042	0.0162	0.0057
TAG	TAG49:0FA15:0	uM	0.0016	0.0031	0.0008	0.0028	0.0022	0.0164	0.0022	0.0142	0.0093	0.0088	0.0157	0.0163	0.0162	0.0052	0.0014	0.0028	0.0013	0.002	0.0023	0.0065	0.0039
TAG	TAG49:0FA16:0	uM	0.0078	0.0124	0.0044	0.0087	0.0082	0.054	0.0086	0.0498	0.0329	0.025	0.0609	0.0545	0.0552	0.0191	0.0058	0.0129	0.0059	0.0079	0.0097	0.0238	0.0164
TAG	TAG49:0FA17:0	uM	0.0026	0.0051	0.0016	0.0033	0.0029	0.0195	0.0035	0.0156	0.0105	0.0085	0.0222	0.0187	0.0185	0.01	0.0019	0.0045	0.0021	0.0031	0.0039	0.0077	0.0053
TAG	TAG49:0FA18:0	uM	0.0029	0.0035	0.002	0.0027	0.0025	0.011	0.0019	0.0061	0.0049	0.005	0.0085	0.0094	0.0111	0.0052	0.0021	0.0029	0.0023	0.0026	0.0033	0.0039	0.0035
TAG	TAG49:1FA14:0	uM	0.0011	0.0019	0.0007	0.0013	0.0011	0.0159	0.0021	0.0103	0.0097	0.0073	0.0177	0.0096	0.0116	0.0031	0.0011	0.0019		0.0009	0.0014	0.0039	0.0018
TAG	TAG49:1FA15:0	uM	0.0116	0.0176	0.0058	0.0143	0.0135	0.1786	0.0198	0.1248	0.0933	0.0899	0.2069	0.172	0.1655	0.0291	0.0079	0.0304	0.0053	0.0124	0.0178	0.0712	0.0317
TAG	TAG49:1FA16:0	uM	0.0222	0.0312	0.0092	0.0246	0.025	0.2771	0.0306	0.2051	0.1357	0.1335	0.3177	0.2625	0.2544	0.0477	0.0147	0.0498	0.0094	0.0186	0.0241	0.1128	0.0523
TAG	TAG49:1FA16:1	uM	0.0034	0.005	0.0022	0.0037	0.0032	0.0236	0.0029	0.0154	0.0129	0.0149	0.0267	0.0225	0.0248	0.0129	0.0021	0.0041	0.0019	0.0024	0.0041	0.0106	0.0048
TAG	TAG49:1FA17:0	uM	0.0024	0.0031	0.001	0.0027	0.0027	0.0316	0.0033	0.0212	0.0171	0.0161	0.0372	0.0248	0.0252	0.0098	0.002	0.0048	0.0011	0.0024	0.0031	0.0089	0.0047
TAG	TAG49:1FA18:1	uM	0.0175	0.023	0.0082	0.0189	0.0174	0.1857	0.0215	0.1176	0.0926	0.0745	0.1812	0.1574	0.1599	0.0307	0.0104	0.0299	0.0078	0.0142	0.0182	0.0716	0.0356
TAG	TAG49:2FA14:0	uM	0.0023	0.0028	0.0015	0.0025	0.0026	0.0332	0.0042	0.029	0.0299	0.0192	0.0589	0.0309	0.0273	0.0036	0.0013	0.0046	0.0011	0.0019	0.003	0.0108	0.004
TAG	TAG49:2FA15:0	uM	0.0182	0.0337	0.01	0.0277	0.0255	0.3493	0.0475	0.3086	0.2236	0.1832	0.5254	0.3747	0.3737	0.0494	0.0124	0.0691	0.0091	0.0232	0.0342	0.1448	0.0686
TAG	TAG49:2FA16:0	uM	0.021	0.038	0.0117	0.0325	0.0293	0.3831	0.0482	0.3155	0.227	0.1896	0.5493	0.3734	0.4137	0.0496	0.0165	0.0756	0.0108	0.0271	0.0359	0.1577	0.0756
TAG	TAG49:2FA16:1	uM	0.0091	0.0102	0.0035	0.0096	0.0094	0.0885	0.0083	0.0703	0.0563	0.0811	0.1335	0.0965	0.0931	0.0219	0.0038	0.0146	0.0026	0.0049	0.0066	0.0385	0.0118
TAG	TAG49:2FA17:0	uM	0.0015	0.0019	0.0007	0.0019	0.0019	0.0244	0.0044	0.0225	0.0261	0.0163	0.0486	0.024	0.0249	0.0057		0.0047	0.0009	0.0015	0.002	0.008	0.0035
TAG	TAG49:2FA18:1	uM	0.0083	0.0108	0.0034	0.0092	0.011	0.1128	0.0124	0.0811	0.0847	0.0728	0.1524	0.1117	0.0993	0.019	0.005	0.0167	0.0035	0.0061	0.0091	0.0422	0.017
TAG	TAG49:2FA18:2	uM	0.022	0.0357	0.0137	0.0289	0.0264	0.2945	0.043	0.2494	0.1973	0.1315	0.4251	0.3067	0.3312	0.0447	0.0156	0.066	0.013	0.0278	0.0328	0.1358	0.0716
TAG	TAG49:3FA15:0	uM	0.0062	0.0104	0.0035	0.0084	0.0088	0.102	0.0098	0.0853	0.0732	0.0683	0.1558	0.1087	0.1124	0.013	0.004	0.0208	0.0027	0.006	0.0086	0.0442	0.0169
TAG	TAG49:3FA16:0	uM	0.0045	0.0063	0.0024	0.0051	0.0041	0.0575	0.0094	0.0507	0.0425	0.0316	0.092	0.0559	0.0664	0.0092	0.0039	0.0119	0.0022	0.0045	0.0052	0.0241	0.0115
TAG	TAG49:3FA16:1	uM	0.007	0.0118	0.0035	0.0109	0.0098	0.0967	0.0094	0.0914	0.0791	0.0852	0.1732	0.119	0.1162	0.0152	0.0055	0.0201	0.0031	0.0062	0.0098	0.047	0.0176
TAG	TAG49:3FA18:2	uM	0.0094	0.0142	0.0052	0.0136	0.0138	0.169	0.0189	0.1445	0.1402	0.098	0.2811	0.1729	0.1818	0.0207	0.0078	0.03	0.0041	0.0096	0.0115	0.0756	0.0279
TAG	TAG49:3FA18:3	uM	0.0026	0.0029	0.0017	0.0018	0.0023	0.0181	0.0018	0.0135	0.0095	0.0068	0.0183	0.0143	0.0184	0.0031	0.0014	0.0044	0.0013	0.0023	0.0026	0.0082	0.0043
TAG	TAG50:0FA14:0	uM	0.0014	0.0027	0.001	0.0016	0.0013	0.0099	0.0016	0.0066	0.0061	0.0042	0.0085	0.0064	0.0066	0.0022	0.0011	0.002	0.0011	0.0011	0.0018	0.0038	0.0023
TAG	TAG50:0FA16:0	uM	0.0667	0.1324	0.0327	0.1155	0.1074	1.3855	0.164	1.0534	0.5246	0.4624	1.2796	1.2473	1.1978	0.1865	0.0476	0.2671	0.0309	0.0963	0.1366	0.5732	0.2437
TAG	TAG50:0FA18:0	uM	0.0162	0.0305	0.0074	0.0258	0.0235	0.2744	0.0359	0.209	0.0994	0.0837	0.2421	0.2455	0.2216	0.0405	0.0104	0.0519	0.0073	0.0207	0.0273	0.1072	0.0471
TAG	TAG50:1FA14:0	uM	0.0095	0.012	0.0034	0.0103	0.0111	0.1673	0.0172	0.1154	0.0881	0.0643	0.1641	0.1359	0.1169	0.0168	0.0054	0.021	0.0036	0.0074	0.0111	0.0501	0.0196
TAG	TAG50:1FA16:0	uM	0.6779	1.4389	0.3461	1.2847	1.2478	15.2182	1.7176	12.1346	5.7461	5.6147	14.6144	14.302	14.0733	1.9901	0.5217	3.1652	0.3041	1.0629	1.4986	6.8447	2.8755
TAG	TAG50:1FA16:1	uM	0.0344	0.0522	0.0093	0.0471	0.0457	0.4832	0.037	0.3756	0.2126	0.2862	0.5583	0.5077	0.4708	0.0465	0.0166	0.0776	0.0102	0.0224	0.028	0.2292	0.063
TAG	TAG50:1FA18:0	uM	0.0236	0.0319	0.0067	0.0272	0.0258	0.325	0.031	0.2423	0.1524	0.1386	0.3582	0.3216	0.2671	0.0338	0.0116	0.0451	0.0059	0.016	0.0206	0.1216	0.039
TAG	TAG50:1FA18:1	uM	0.3309	0.6562	0.1543	0.5905	0.575	6.5342	0.7344	4.9957	2.5106	2.3942	6.0714	6.3288	6.151	0.873	0.2386	1.3312	0.1353	0.4648	0.6705	3.0759	1.2819
TAG	TAG50:1FA20:1	uM	0.0019	0.0015	0.0008	0.0016	0.0017	0.0156	0.0024	0.0125	0.0082	0.0089	0.0144	0.0147	0.014	0.002	0.001	0.0029		0.0016	0.0021	0.0073	0.0032
TAG	TAG50:2FA14:0	uM	0.0801	0.1043	0.022	0.0936	0.0956	1.3646	0.139	1.0132	0.7809	0.5672	1.4288	1.1668	0.997	0.1342	0.0367	0.188	0.0237	0.0623	0.0938	0.4805	0.1781
TAG	TAG50:2FA14:1	uM	0.0011	0.0015	0.0008	0.0013	0.0014	0.023	0.0041	0.0178	0.0223	0.0097	0.028	0.0192	0.0163	0.0033	0.0008	0.0034	0.0008	0.0013	0.0018	0.0074	0.0025
TAG	TAG50:2FA16:0	uM	1.0614	2.7531	0.6701	2.5919	2.5023	29.1586	3.5981	26.8465	14.2457	12.1199	34.7818	30.2395	32.2397	4.0009	0.987	7.1846	0.5548	2.1737	3.2116	14.7768	6.499
TAG	TAG50:2FA16:1	uM	0.3493	0.5462	0.1037	0.5288	0.5189	5.1656	0.3882	4.4061	2.3515	3.3163	6.1655	5.652	5.5589	0.4937	0.1766	0.9188	0.0948	0.2411	0.3092	2.6424	0.7237
TAG	TAG50:2FA18:0	uM	0.01	0.0182	0.0056	0.0152	0.0148	0.2653	0.0346	0.209	0.1837	0.107	0.346	0.2393	0.1997	0.0317	0.0077	0.0382	0.004	0.0119	0.0172	0.0898	0.0294
TAG	TAG50:2FA18:1	uM	0.5219	0.7272	0.1316	0.6997	0.6769	7.0689	0.5695	5.5124	3.1038	3.7418	7.54	7.1672	6.6712	0.6848	0.2285	1.164	0.1271	0.3423	0.4294	3.3153	0.9786
TAG	TAG50:2FA18:2	uM	0.3567	1.0451	0.2773	1.0077	0.9579	11.707	1.5306	11.1118	5.6226	4.2308	14.0984	11.9888	13.5392	1.6242	0.3963	3.0413	0.2209	0.9245	1.3456	6.0664	2.7222
TAG	TAG50:2FA20:2	uM	0.0012	0.0011	0.0008	0.0015	0.0009	0.0103	0.0016	0.009	0.0081	0.0073	0.015	0.0122	0.0123	0.0021	0.0008	0.0021		0.0013	0.0016	0.0041	0.0022
TAG	TAG50:3FA14:0	uM	0.118	0.2127	0.0481	0.2193	0.2062	3.2579	0.3243	2.5747	2.0081	1.2059	3.6365	2.8095	2.8032	0.3418	0.0776	0.5468	0.0457	0.1576	0.2343	1.211	0.472
TAG	TAG50:3FA14:1	uM	0.0033	0.006	0.0028	0.0065	0.0049	0.1721	0.0217	0.1453	0.154	0.0707	0.1995	0.1207	0.1245	0.0194	0.0044	0.0197	0.0026	0.005	0.0074	0.0499	0.0144
TAG	TAG50:3FA16:0	uM	0.3907	0.9105	0.1921	0.8913	0.8647	9.5287	0.7679	9.2615	5.2252	5.1667	13.4994	10.5286	11.7398	0.941	0.2917	1.9593	0.1449	0.4979	0.6426	4.9606	1.5064
TAG	TAG50:3FA16:1	uM	0.4004	0.859	0.172	0.864	0.7967	8.5788	0.7025	8.7442	5.3271	6.0647	13.1584	10.0782	10.613	0.8549	0.2774	1.7887	0.1442	0.4506	0.554	4.6055	1.3843
TAG	TAG50:3FA18:0	uM	0.0013	0.0033	0.0014	0.0026	0.0022	0.0517	0.0074	0.0463	0.0412	0.0203	0.0649	0.0474	0.0405	0.0074	0.0017	0.0078	0.0011	0.0032	0.0043	0.0179	0.0066
TAG	TAG50:3FA18:1	uM	0.1863	0.3309	0.074	0.3209	0.3152	4.5587	0.4486	3.9984	2.9162	2.1227	5.565	4.2674	4.0214	0.5032	0.1181	0.7674	0.0692	0.2192	0.3123	1.8836	0.6665
TAG	TAG50:3FA18:2	uM	0.4708	0.9459	0.2053	0.9541	0.9264	10.1289	0.9272	9.8272	5.6931	5.2118	13.353	10.8068	11.8642	1.0835	0.3323	2.1437	0.1645	0.538	0.7354	5.1144	1.6836
TAG	TAG50:3FA18:3	uM	0.0245	0.0453	0.0119	0.0474	0.0456	0.5458	0.0381	0.5349	0.2509	0.1585	0.6699	0.5393	0.6814	0.0623	0.0147	0.1283	0.0082	0.0359	0.0481	0.2692	0.1015
TAG	TAG50:3FA20:3	uM	0.0014	0.0013		0.0019	0.0017	0.013	0.002	0.0128	0.0095	0.0094	0.0204	0.0121	0.0169	0.0028	0.001	0.0026	0.001	0.0014	0.0013	0.0071	0.0025
TAG	TAG50:4FA14:0	uM	0.0313	0.0765	0.0191	0.0828	0.0794	1.3917	0.1233	1.1225	0.7959	0.3731	1.5724	1.1245	1.2595	0.1358	0.0286	0.2554	0.0167	0.0716	0.1123	0.5504	0.221
TAG	TAG50:4FA14:1	uM	0.003	0.0068	0.0026	0.0064	0.0067	0.2189	0.0255	0.179	0.2205	0.0818	0.2661	0.1452	0.167	0.0227	0.0039	0.0264	0.0022	0.0055	0.0088	0.0624	0.0161
TAG	TAG50:4FA16:0	uM	0.021	0.054	0.0135	0.0532	0.0532	0.856	0.0741	0.7904	0.5534	0.3007	1.1791	0.8006	0.9669	0.0834	0.0193	0.1466	0.0091	0.0366	0.0514	0.3459	0.1168
TAG	TAG50:4FA16:1	uM	0.0468	0.0903	0.0149	0.0855	0.0814	1.1203	0.0631	1.0611	0.9175	1.1026	2.161	1.2395	1.2755	0.0811	0.0246	0.17	0.0133	0.0381	0.0444	0.5695	0.1301
TAG	TAG50:4FA18:1	uM	0.0087	0.018	0.0042	0.0185	0.0162	0.4187	0.0327	0.3297	0.3341	0.153	0.5188	0.3136	0.3528	0.036	0.0071	0.0554	0.0037	0.0149	0.0198	0.1323	0.0411
TAG	TAG50:4FA18:2	uM	0.0766	0.2058	0.0504	0.2155	0.2	3.6632	0.3232	3.0353	2.2666	1.2326	4.2942	3.0216	3.3911	0.3468	0.0788	0.6372	0.0409	0.1688	0.2516	1.4521	0.5292
TAG	TAG50:4FA18:3	uM	0.0212	0.0318	0.0066	0.0353	0.0324	0.4125	0.0196	0.3471	0.2159	0.1522	0.5258	0.3818	0.4478	0.0311	0.0118	0.0719	0.0052	0.017	0.022	0.1853	0.051
TAG	TAG50:4FA20:3	uM	0.0011	0.0019	0.0008	0.0014	0.0015	0.011	0.0016	0.0097	0.0087	0.006	0.0137	0.008	0.0122	0.0021		0.0024		0.0014	0.0013	0.0044	0.002
TAG	TAG50:4FA20:4	uM	0.0014	0.0025	0.0011	0.0019	0.0017	0.0259	0.0057	0.0244	0.015	0.0128	0.03	0.0257	0.0293	0.0037	0.0013	0.0044	0.0011	0.0015	0.0021	0.0106	0.0041
TAG	TAG50:5FA14:0	uM	0.0053	0.0093	0.0031	0.01	0.0087	0.1467	0.0101	0.138	0.0996	0.047	0.2145	0.1331	0.1678	0.0108	0.003	0.0282	0.002	0.0069	0.0086	0.0633	0.022
TAG	TAG50:5FA14:1	uM	0.0028	0.0062	0.0024	0.0058	0.0047	0.1468	0.0161	0.1293	0.1576	0.0472	0.1862	0.1119	0.1317	0.0183	0.0033	0.0215	0.0028	0.0063	0.0089	0.0498	0.0155
TAG	TAG50:5FA16:0	uM	0.0028	0.0067	0.0021	0.0068	0.0066	0.1333	0.0115	0.1261	0.0836	0.0356	0.1611	0.1152	0.1512	0.0125	0.0029	0.0226	0.0015	0.0047	0.0066	0.0487	0.0168
TAG	TAG50:5FA16:1	uM	0.0048	0.0082	0.0019	0.0078	0.0072	0.1485	0.0088	0.1355	0.1637	0.1048	0.2915	0.1459	0.1567	0.0096	0.0028	0.0203	0.0018	0.0057	0.006	0.0558	0.0151
TAG	TAG50:5FA18:1	uM	0.0015	0.0028	0.0011	0.0024	0.0027	0.0691	0.0077	0.0671	0.0722	0.022	0.1009	0.054	0.0609	0.0074	0.0017	0.0104	0.0012	0.0022	0.0037	0.0215	0.0066
TAG	TAG50:5FA18:2	uM	0.0066	0.0196	0.0055	0.0205	0.0181	0.474	0.0416	0.4548	0.4673	0.1677	0.6739	0.3856	0.4816	0.0477	0.0082	0.0775	0.0045	0.0163	0.0256	0.1735	0.0524
TAG	TAG50:5FA18:3	uM	0.0084	0.0137	0.0039	0.0163	0.0149	0.2366	0.014	0.2217	0.1823	0.0883	0.3522	0.2149	0.262	0.0237	0.0061	0.0465	0.0027	0.0097	0.014	0.1014	0.0335
TAG	TAG50:5FA20:4	uM	0.001	0.0013	0.0009	0.0017	0.0012	0.0171	0.0043	0.0158	0.0138	0.01	0.0204	0.0176	0.0188	0.0039	0.0011	0.004	0.0009		0.002	0.0052	0.0024
TAG	TAG50:5FA20:5	uM	0.0013	0.0019	0.001	0.0016	0.0017	0.0169	0.0034	0.0199	0.0096	0.0046	0.0217	0.0155	0.0252	0.002	0.0012	0.0044	0.0005	0.0011	0.002	0.0089	0.0034
TAG	TAG50:6FA20:4	uM		0.0015	0.0011	0.0014	0.0014	0.0225	0.0058	0.0184	0.0206	0.0084	0.0248	0.016	0.0251	0.0032	0.0011	0.0037		0.0011	0.0019	0.0062	0.0024
TAG	TAG51:0FA16:0	uM	0.007	0.0115	0.0038	0.008	0.0078	0.0661	0.012	0.0607	0.0337	0.0216	0.0706	0.0624	0.0806	0.0128	0.0056	0.0173	0.0045	0.0076	0.0082	0.0314	0.0139
TAG	TAG51:0FA17:0	uM	0.002	0.0039	0.0013	0.0021	0.0026	0.024	0.004	0.0128	0.0105	0.0084	0.0225	0.0205	0.0167	0.0044	0.0016	0.0046	0.0012	0.0022	0.0024	0.0077	0.0047
TAG	TAG51:0FA18:0	uM	0.003	0.0058	0.0023	0.0032	0.003	0.0127	0.0033	0.0103	0.0078	0.0051	0.014	0.0104	0.0126	0.0045	0.0024	0.0034	0.0028	0.003	0.0033	0.0058	0.0046
TAG	TAG51:1FA15:0	uM	0.0044	0.0052	0.0025	0.0059	0.0052	0.0423	0.0062	0.0262	0.0161	0.0167	0.0337	0.0369	0.032	0.0078	0.0025	0.0074	0.0025	0.0035	0.005	0.0159	0.0072
TAG	TAG51:1FA16:0	uM	0.023	0.0333	0.0123	0.0285	0.0255	0.266	0.0434	0.195	0.1247	0.105	0.2777	0.2536	0.2353	0.0445	0.015	0.0565	0.0122	0.0213	0.0282	0.1043	0.0547
TAG	TAG51:1FA17:0	uM	0.0137	0.0265	0.0085	0.0208	0.0211	0.212	0.0337	0.1579	0.1066	0.0853	0.2356	0.2022	0.1781	0.0374	0.0111	0.0463	0.0074	0.0164	0.0255	0.0777	0.0451
TAG	TAG51:1FA18:0	uM	0.0068	0.0106	0.0047	0.0076	0.0077	0.055	0.0084	0.0342	0.0224	0.0211	0.0507	0.0483	0.0397	0.0117	0.0056	0.0093	0.0049	0.0056	0.0093	0.02	0.0143
TAG	TAG51:1FA18:1	uM	0.0272	0.0372	0.0135	0.0289	0.0275	0.2497	0.0378	0.1605	0.103	0.0887	0.2274	0.2251	0.19	0.0381	0.0175	0.0502	0.0148	0.0226	0.0288	0.093	0.0533
TAG	TAG51:2FA15:0	uM	0.0298	0.0469	0.0126	0.0372	0.0386	0.3254	0.0455	0.2096	0.1206	0.1242	0.264	0.3027	0.281	0.047	0.0173	0.062	0.0104	0.0258	0.033	0.1473	0.0726
TAG	TAG51:2FA16:0	uM	0.0715	0.1103	0.0428	0.0998	0.0924	0.7135	0.1041	0.5686	0.3453	0.3246	0.8581	0.7376	0.7092	0.1062	0.053	0.1641	0.0395	0.0707	0.0907	0.3306	0.1629
TAG	TAG51:2FA16:1	uM	0.0052	0.0091	0.0022	0.0069	0.0052	0.063	0.0072	0.0511	0.0442	0.0444	0.0976	0.0709	0.0651	0.0115	0.0027	0.0119	0.002	0.0037	0.0051	0.0283	0.0102
TAG	TAG51:2FA17:0	uM	0.0228	0.0419	0.0136	0.0372	0.0374	0.4063	0.0675	0.3519	0.2337	0.1667	0.5541	0.4017	0.4001	0.0599	0.0199	0.0895	0.0118	0.0315	0.0455	0.1499	0.0856
TAG	TAG51:2FA18:0	uM	0.0158	0.0217	0.0137	0.0173	0.0185	0.0699	0.0185	0.0497	0.037	0.0302	0.0693	0.0614	0.0576	0.0195	0.0156	0.0192	0.0132	0.0155	0.0208	0.0365	0.0296
TAG	TAG51:2FA18:1	uM	0.106	0.1428	0.0468	0.1355	0.1303	1.0295	0.1157	0.6621	0.3454	0.4132	0.8552	0.9629	0.849	0.1411	0.0624	0.1971	0.0435	0.081	0.1073	0.4511	0.221
TAG	TAG51:2FA18:2	uM	0.0345	0.0548	0.0233	0.0454	0.0433	0.4072	0.064	0.3188	0.2018	0.1346	0.4625	0.3917	0.4021	0.0654	0.0266	0.0894	0.0197	0.0381	0.0466	0.1674	0.0998
TAG	TAG51:3FA15:0	uM	0.0492	0.0964	0.0273	0.0957	0.0889	0.8299	0.106	0.5637	0.2924	0.2846	0.7352	0.7741	0.7684	0.1203	0.0401	0.1805	0.0224	0.0641	0.0886	0.3864	0.1992
TAG	TAG51:3FA16:0	uM	0.5016	0.7473	0.5368	0.7235	0.717	1.3652	0.5322	1.1635	0.9204	0.9576	1.5152	1.3864	1.3236	0.6652	0.6145	0.6707	0.5367	0.5958	0.8664	1.0455	0.974
TAG	TAG51:3FA16:1	uM	0.0093	0.0165	0.0039	0.0132	0.0143	0.1547	0.0137	0.1166	0.1069	0.1168	0.2294	0.166	0.1389	0.016	0.0054	0.0278	0.0036	0.0069	0.0097	0.0642	0.021
TAG	TAG51:3FA17:0	uM	0.0057	0.01	0.0026	0.008	0.0087	0.1017	0.011	0.0828	0.0737	0.0567	0.1715	0.1039	0.099	0.0113	0.0038	0.0197	0.0023	0.0058	0.0068	0.0337	0.0164
TAG	TAG51:3FA18:1	uM	0.4103	0.6204	0.4283	0.6173	0.5878	1.5853	0.4755	1.1934	0.885	0.9135	1.5115	1.4617	1.3908	0.6197	0.4943	0.6347	0.4285	0.4966	0.6899	1.0255	0.8725
TAG	TAG51:3FA18:2	uM	0.0907	0.1679	0.0486	0.1636	0.1675	1.5081	0.1629	1.0513	0.5751	0.5277	1.445	1.3993	1.4379	0.197	0.0699	0.3278	0.0403	0.1093	0.137	0.7091	0.3383
TAG	TAG51:3FA18:3	uM	0.0041	0.004	0.0022	0.0033	0.0037	0.0255	0.002	0.0158	0.0118	0.0074	0.028	0.022	0.027	0.0038	0.0022	0.005	0.0017	0.0028	0.0031	0.0103	0.0054
TAG	TAG51:4FA15:0	uM	0.0236	0.0604	0.0185	0.0614	0.0619	0.6189	0.0747	0.4346	0.2337	0.1568	0.5065	0.5348	0.6213	0.0809	0.0253	0.1504	0.0135	0.0477	0.0666	0.2906	0.1544
TAG	TAG51:4FA16:0	uM	0.0665	0.0872	0.0707	0.0889	0.087	0.1857	0.0661	0.1679	0.1362	0.1198	0.2161	0.1902	0.198	0.0843	0.0785	0.0893	0.0665	0.0756	0.1039	0.1412	0.124
TAG	TAG51:4FA16:1	uM	0.0071	0.0113	0.0028	0.0113	0.0096	0.1036	0.0081	0.0889	0.0854	0.0986	0.1877	0.1296	0.1137	0.0114	0.0041	0.0208	0.0027	0.0054	0.0076	0.0508	0.0172
TAG	TAG51:4FA18:1	uM	0.0515	0.077	0.0532	0.0689	0.0698	0.1788	0.0572	0.1459	0.1344	0.1184	0.2034	0.1857	0.1734	0.0739	0.0626	0.076	0.0525	0.0594	0.0857	0.118	0.1076
TAG	TAG51:4FA18:2	uM	0.0546	0.1257	0.0431	0.131	0.1301	1.2672	0.1488	0.9512	0.5261	0.3764	1.1249	1.1524	1.302	0.1641	0.0539	0.3088	0.0297	0.1023	0.1432	0.6257	0.3237
TAG	TAG51:4FA18:3	uM	0.0082	0.0128	0.0042	0.013	0.0118	0.1072	0.008	0.0822	0.0435	0.0339	0.1089	0.0952	0.1168	0.0117	0.0049	0.0233	0.0033	0.0073	0.0095	0.0542	0.023
TAG	TAG51:4FA20:4	uM	0.0017	0.0014	0.0011	0.0016	0.0015	0.0113	0.0025	0.0062	0.0061	0.0055	0.0088	0.0098	0.0112	0.0019	0.0017	0.0022	0.001	0.0015	0.0018	0.0042	0.0025
TAG	TAG51:5FA18:2	uM	0.007	0.0114	0.005	0.0123	0.0117	0.1272	0.013	0.1046	0.0911	0.0505	0.1643	0.1192	0.1403	0.0159	0.0058	0.0305	0.0034	0.0103	0.0124	0.0608	0.0275
TAG	TAG51:5FA18:3	uM	0.0058	0.0107	0.003	0.01	0.0092	0.0887	0.0072	0.071	0.0445	0.0312	0.1076	0.0807	0.1073	0.0096	0.0042	0.0221	0.0026	0.0069	0.0098	0.0453	0.0228
TAG	TAG52:0FA16:0	uM	0.0154	0.0252	0.008	0.0187	0.0182	0.1887	0.0289	0.1199	0.0638	0.0607	0.1328	0.1642	0.1373	0.0327	0.0105	0.0354	0.0066	0.0159	0.0211	0.0685	0.0313
TAG	TAG52:0FA18:0	uM	0.0194	0.0329	0.0097	0.0261	0.0272	0.2414	0.0371	0.1622	0.0779	0.0738	0.1741	0.2218	0.1817	0.0379	0.0139	0.0445	0.0091	0.0204	0.027	0.0964	0.0427
TAG	TAG52:0FA20:0	uM	0.0036	0.0035	0.0018	0.0035	0.0038	0.0334	0.0042	0.0256	0.0169	0.0139	0.0341	0.0337	0.0286	0.0085	0.0024	0.0074	0.0018	0.0034	0.0065	0.0159	0.0092
TAG	TAG52:1FA16:0	uM	0.2921	0.4461	0.1246	0.4416	0.4319	3.8844	0.5178	2.5595	1.0351	1.1404	2.5583	3.3919	2.9614	0.5994	0.1819	0.7342	0.1029	0.2917	0.3756	1.623	0.6983
TAG	TAG52:1FA16:1	uM	0.0037	0.0053	0.0019	0.0049	0.0041	0.0395	0.0048	0.0304	0.0232	0.024	0.0385	0.0371	0.0274	0.0072	0.0029	0.0066	0.0017	0.0028	0.0037	0.0165	0.0059
TAG	TAG52:1FA18:0	uM	0.1853	0.2846	0.085	0.2735	0.266	2.7728	0.3791	1.796	0.7697	0.7272	1.9692	2.3317	1.9939	0.4016	0.1227	0.4962	0.0684	0.1974	0.2558	1.0588	0.4551
TAG	TAG52:1FA18:1	uM	0.4189	0.662	0.1694	0.6776	0.6275	5.8186	0.7037	3.7757	1.3748	1.6111	3.5035	4.9727	4.3754	0.8345	0.2657	1.1102	0.1491	0.4339	0.554	2.5497	1.0612
TAG	TAG52:1FA20:0	uM	0.0037	0.0038	0.0016	0.0045	0.0043	0.0348	0.0041	0.0292	0.0209	0.0232	0.0412	0.0442	0.0303	0.0062	0.0018	0.0061	0.0012	0.0022	0.0039	0.0178	0.0073
TAG	TAG52:1FA20:1	uM	0.0069	0.0092	0.0033	0.0098	0.0099	0.0752	0.0152	0.0674	0.036	0.0474	0.0693	0.0904	0.0742	0.0186	0.005	0.0208	0.0026	0.0085	0.0114	0.0451	0.0197
TAG	TAG52:2FA14:0	uM	0.0027	0.0039	0.0014	0.003	0.0032	0.0324	0.0059	0.0267	0.0314	0.031	0.041	0.0394	0.0274	0.0068	0.0018	0.0063	0.0013	0.0026	0.003	0.0158	0.0063
TAG	TAG52:2FA16:0	uM	2.4442	4.1159	1.0838	4.1923	4.1421	33.9673	4.2523	22.4224	8.9286	9.8222	22.4427	30.4545	28.6055	5.1476	1.69	7.3451	0.9005	2.7318	3.575	17.0053	7.0488
TAG	TAG52:2FA16:1	uM	0.0423	0.0681	0.014	0.0635	0.0596	0.6734	0.0647	0.4427	0.3098	0.3901	0.6467	0.6745	0.4695	0.076	0.0253	0.1005	0.014	0.0355	0.0447	0.2774	0.0946
TAG	TAG52:2FA18:0	uM	0.2276	0.4689	0.1626	0.4571	0.431	4.8025	0.727	3.5288	1.6979	1.3225	4.2665	4.4686	4.0317	0.739	0.221	0.9972	0.1148	0.3754	0.4935	2.0023	0.917
TAG	TAG52:2FA18:1	uM	4.351	7.1922	1.792	7.2631	6.7492	53.3826	6.586	35.9437	14.0793	16.9529	34.5353	48.0251	44.7698	8.5912	2.8664	11.8176	1.5369	4.5403	5.7276	27.3226	11.8574
TAG	TAG52:2FA18:2	uM	0.4151	0.8955	0.266	0.9338	0.8938	8.8033	1.1592	6.245	2.4627	2.0824	6.2723	7.538	7.9559	1.3158	0.3903	1.9898	0.1992	0.7178	0.9543	4.1614	1.8684
TAG	TAG52:2FA20:0	uM	0.0033	0.0045	0.0016	0.0053	0.0057	0.0538	0.0067	0.0371	0.0286	0.0243	0.0499	0.0534	0.0458	0.0088	0.0027	0.0108	0.0017	0.0044	0.0057	0.023	0.012
TAG	TAG52:2FA20:1	uM	0.0112	0.0131	0.0035	0.014	0.012	0.0998	0.0148	0.089	0.0588	0.0988	0.1123	0.1266	0.1016	0.0159	0.0054	0.0203	0.0033	0.0065	0.0092	0.0658	0.0217
TAG	TAG52:2FA20:2	uM	0.005	0.0076	0.0032	0.0074	0.0068	0.0661	0.0105	0.0565	0.0394	0.0439	0.0763	0.0742	0.0663	0.014	0.0035	0.0138	0.0025	0.0082	0.009	0.0366	0.0179
TAG	TAG52:3FA14:0	uM	0.0044	0.0062	0.0018	0.0055	0.0066	0.0702	0.0116	0.0663	0.0645	0.062	0.0926	0.0699	0.0628	0.0113	0.0031	0.012	0.0024	0.0052	0.0064	0.0313	0.0133
TAG	TAG52:3FA16:0	uM	4.0665	8.9271	2.5637	10.0263	9.5926	71.8316	10.1998	55.1834	23.1647	21.1397	52.1755	65.6163	70.41	11.9342	3.8345	19.6944	2.0026	7.0344	9.6456	39.1191	18.6892
TAG	TAG52:3FA16:1	uM	0.3314	0.5441	0.1076	0.5049	0.4745	5.1481	0.4638	3.8401	2.4462	3.1873	4.9658	4.9699	4.1148	0.5676	0.1748	0.8226	0.1048	0.2755	0.3536	2.4265	0.7573
TAG	TAG52:3FA18:0	uM	0.0438	0.0887	0.0255	0.0854	0.0858	0.9535	0.1035	0.7832	0.5124	0.3895	1.0806	0.9103	0.8156	0.113	0.0357	0.1755	0.0194	0.0583	0.076	0.3954	0.1456
TAG	TAG52:3FA18:1	uM	4.5134	9.7318	2.7243	10.5627	10.0799	74.2971	10.8493	56.302	26.3087	24.8068	58.3286	69.4228	72.3705	12.5959	4.0696	20.4001	2.1526	7.2021	9.8285	40.1057	18.65
TAG	TAG52:3FA18:2	uM	3.8623	8.612	2.5114	9.3097	9.2645	70.2093	9.8969	51.8744	22.4099	19.4746	50.5362	62.869	67.4291	11.6084	3.6762	19.0822	1.839	6.7078	9.5209	37.8185	17.8287
TAG	TAG52:3FA18:3	uM	0.0355	0.0696	0.0167	0.0788	0.0753	0.7053	0.0597	0.5226	0.2099	0.1493	0.5354	0.6095	0.7136	0.0847	0.0269	0.1662	0.0125	0.0512	0.0724	0.3591	0.1452
TAG	TAG52:3FA20:0	uM	0.0111	0.0267	0.0072	0.0273	0.0276	0.2455	0.0288	0.1716	0.0676	0.0624	0.1702	0.2119	0.2379	0.0304	0.0096	0.0585	0.0053	0.0216	0.0267	0.1305	0.0555
TAG	TAG52:3FA20:1	uM	0.0066	0.0122	0.0034	0.0109	0.0121	0.1201	0.0189	0.1107	0.0844	0.0846	0.1341	0.1324	0.1106	0.0184	0.005	0.0243	0.0027	0.0091	0.0128	0.0581	0.0253
TAG	TAG52:3FA20:2	uM	0.01	0.0162	0.0038	0.0178	0.0177	0.1393	0.0174	0.1131	0.0687	0.0888	0.1544	0.1531	0.1385	0.0203	0.0067	0.0328	0.0041	0.0109	0.0144	0.0743	0.0294
TAG	TAG52:3FA20:3	uM	0.0084	0.0139	0.0044	0.0131	0.0127	0.1039	0.0136	0.0763	0.0467	0.0505	0.0924	0.0926	0.0915	0.0147	0.0061	0.0217	0.0035	0.0116	0.0132	0.0437	0.023
TAG	TAG52:3FA22:1	uM	0.0032	0.0069	0.0017	0.0072	0.007	0.0651	0.0076	0.0498	0.0198	0.0179	0.0462	0.0567	0.0597	0.0093	0.0032	0.0171	0.0014	0.0058	0.0095	0.0341	0.0154
TAG	TAG52:4FA14:0	uM	0.0048	0.0068	0.0027	0.0077	0.0068	0.0664	0.0097	0.0623	0.057	0.0515	0.0976	0.0722	0.0595	0.0107	0.0035	0.0127	0.0033	0.0056	0.0068	0.028	0.0137
TAG	TAG52:4FA16:0	uM	1.9914	5.5014	1.8353	6.8392	6.5822	53.8689	7.0303	43.7046	16.3815	11.5546	39.682	49.4076	58.9478	8.8578	2.4911	16.4305	1.1438	5.2521	7.47	31.2242	15.1573
TAG	TAG52:4FA16:1	uM	0.5025	1.09	0.2403	1.0471	1.0567	11.4611	1.061	9.5921	6.1061	6.1568	12.3545	11.5849	10.542	1.3619	0.3789	2.2357	0.1969	0.6665	0.8767	5.9587	2.1278
TAG	TAG52:4FA18:0	uM	0.0057	0.0111	0.0036	0.0107	0.0099	0.1426	0.0163	0.1115	0.1048	0.0452	0.1658	0.1229	0.1213	0.021	0.0053	0.0251	0.0026	0.0089	0.0122	0.0564	0.0229
TAG	TAG52:4FA18:1	uM	0.7046	1.572	0.364	1.5677	1.5406	15.9612	1.4095	13.145	8.019	7.5941	16.3398	15.7859	16.1169	1.8403	0.5505	3.3211	0.2896	1.0077	1.3239	8.3009	3.0441
TAG	TAG52:4FA18:2	uM	3.5829	9.9331	3.3168	11.6528	11.5082	83.6774	12.5877	66.9187	31.8294	23.7391	64.5972	77.959	89.4788	14.8019	4.4926	27.3316	2.0454	9.2325	13.2151	48.3296	25.512
TAG	TAG52:4FA18:3	uM	0.3893	0.6889	0.2016	0.7796	0.8035	6.5687	0.5866	5.4967	2.0668	1.5761	5.3814	6.24	7.6138	0.8593	0.2688	1.8021	0.131	0.5288	0.7424	3.7269	1.5467
TAG	TAG52:4FA20:0	uM	0.016	0.0431	0.0141	0.0537	0.0525	0.4823	0.0567	0.3908	0.137	0.1022	0.3601	0.431	0.5531	0.0669	0.0197	0.1422	0.0089	0.0398	0.062	0.2662	0.1279
TAG	TAG52:4FA20:2	uM	0.0062	0.0107	0.003	0.0118	0.0108	0.1216	0.0156	0.1038	0.0689	0.0652	0.1426	0.1128	0.1155	0.0181	0.0047	0.0274	0.0029	0.0084	0.0128	0.0582	0.0271
TAG	TAG52:4FA20:3	uM	0.0155	0.0213	0.0061	0.0234	0.0271	0.1911	0.0206	0.1547	0.0982	0.1125	0.2033	0.1904	0.2082	0.027	0.0083	0.0422	0.0044	0.0152	0.0193	0.1063	0.0431
TAG	TAG52:4FA20:4	uM	0.0191	0.0284	0.0104	0.0323	0.0299	0.2752	0.0578	0.2279	0.1184	0.1335	0.23	0.2623	0.2949	0.0441	0.0122	0.0667	0.0092	0.0226	0.0292	0.1116	0.0585
TAG	TAG52:4FA22:1	uM	0.0043	0.0114	0.0029	0.0139	0.0119	0.1262	0.0128	0.1035	0.0423	0.0368	0.0964	0.1164	0.1326	0.0165	0.0056	0.0334	0.0026	0.0101	0.013	0.0671	0.0282
TAG	TAG52:4FA22:4	uM	0.0021	0.0038	0.0018	0.0046	0.0047	0.0456	0.0049	0.0373	0.0133	0.0104	0.0331	0.0384	0.0489	0.0058	0.0014	0.0119	0.0012	0.0034	0.0058	0.0229	0.0105
TAG	TAG52:5FA14:0	uM	0.0059	0.0065	0.0019	0.0067	0.0077	0.084	0.0107	0.0786	0.0671	0.0574	0.1161	0.0802	0.0919	0.0119	0.0028	0.0156	0.0019	0.0056	0.0063	0.0343	0.0137
TAG	TAG52:5FA16:0	uM	0.2648	0.5714	0.1815	0.7523	0.7389	6.4113	0.4597	5.8446	2.1699	1.4388	6.0677	6.2369	8.3571	0.722	0.2379	1.8113	0.1072	0.4697	0.6742	3.6494	1.5298
TAG	TAG52:5FA16:1	uM	0.2335	0.6195	0.1536	0.6632	0.6557	7.5934	0.706	6.8593	4.4414	3.4152	8.4941	7.6123	8.2511	0.9391	0.2219	1.7747	0.117	0.4931	0.6898	4.0285	1.5774
TAG	TAG52:5FA18:1	uM	0.0661	0.1304	0.0337	0.1454	0.1431	2.016	0.1594	1.7422	1.4958	0.8385	2.4522	1.8646	1.9485	0.2224	0.0502	0.3758	0.0255	0.1054	0.151	0.9073	0.3373
TAG	TAG52:5FA18:2	uM	0.5344	1.4477	0.3993	1.7201	1.6765	17.6289	1.5277	16.0091	9.0097	6.5467	19.1395	17.1744	19.7853	2.1812	0.5488	4.3954	0.2711	1.2163	1.7156	9.6908	3.8422
TAG	TAG52:5FA18:3	uM	0.3741	0.778	0.2463	0.9721	0.9999	8.2312	0.5978	7.3079	2.9248	2.0114	7.8459	7.5885	10.3326	1.0304	0.3139	2.3599	0.1467	0.6439	0.8702	4.7848	1.979
TAG	TAG52:5FA20:3	uM	0.0054	0.0094	0.0021	0.0099	0.0092	0.0931	0.0103	0.0901	0.083	0.0707	0.1483	0.0924	0.0956	0.0124	0.003	0.0189	0.0024	0.0076	0.0081	0.0473	0.018
TAG	TAG52:5FA20:4	uM	0.0251	0.0269	0.0072	0.0304	0.031	0.2651	0.0355	0.2275	0.1433	0.1959	0.284	0.2615	0.3268	0.0326	0.0123	0.0519	0.0074	0.0142	0.0178	0.1172	0.0432
TAG	TAG52:5FA20:5	uM	0.0152	0.014	0.0053	0.0188	0.0191	0.1502	0.0276	0.1617	0.0478	0.039	0.1308	0.1475	0.2278	0.021	0.0074	0.0533	0.0048	0.0094	0.0169	0.076	0.0326
TAG	TAG52:5FA22:5	uM	0.0105	0.0192	0.0063	0.0234	0.0244	0.2367	0.0207	0.2255	0.0986	0.0596	0.2388	0.2242	0.3025	0.0269	0.0075	0.0635	0.0042	0.0191	0.0241	0.1277	0.0519
TAG	TAG52:6FA14:0	uM	0.0057	0.0079	0.0026	0.0086	0.0076	0.1221	0.0194	0.1305	0.0836	0.0549	0.17	0.1191	0.1359	0.0149	0.0039	0.0251	0.0024	0.0065	0.0104	0.0463	0.0168
TAG	TAG52:6FA16:0	uM	0.0261	0.0492	0.0156	0.0623	0.0605	0.5445	0.0429	0.5379	0.2128	0.1111	0.502	0.4804	0.7327	0.0691	0.0196	0.1636	0.0095	0.0378	0.0518	0.3178	0.118
TAG	TAG52:6FA16:1	uM	0.0346	0.0717	0.0172	0.084	0.0757	0.9016	0.0462	0.9227	0.5932	0.4729	1.3684	0.9331	1.1313	0.077	0.025	0.205	0.0119	0.0458	0.065	0.485	0.156
TAG	TAG52:6FA18:1	uM	0.0065	0.0135	0.0038	0.0155	0.0138	0.2401	0.0207	0.2316	0.2201	0.0834	0.3112	0.2166	0.2477	0.027	0.0049	0.05	0.0032	0.0104	0.0178	0.1007	0.0356
TAG	TAG52:6FA18:2	uM	0.0539	0.1298	0.0373	0.1519	0.1471	2.137	0.1699	1.9965	1.7324	0.7704	2.7577	1.9834	2.3633	0.2486	0.0499	0.4667	0.0239	0.1286	0.1843	1.0188	0.3864
TAG	TAG52:6FA18:3	uM	0.053	0.1114	0.0292	0.1277	0.1226	1.3017	0.066	1.2601	0.7772	0.5879	1.8356	1.3779	1.7095	0.1257	0.0362	0.303	0.0164	0.0692	0.1009	0.7336	0.2334
TAG	TAG52:6FA20:4	uM	0.0098	0.0124	0.0041	0.015	0.0144	0.1867	0.0307	0.163	0.1433	0.1434	0.2301	0.1721	0.214	0.0235	0.0069	0.0368	0.004	0.0093	0.0114	0.0686	0.0282
TAG	TAG52:6FA20:5	uM	0.0197	0.0186	0.0064	0.0256	0.0239	0.1769	0.0235	0.221	0.085	0.0873	0.2093	0.2062	0.311	0.0198	0.0081	0.0594	0.0042	0.0089	0.0131	0.1013	0.0286
TAG	TAG52:6FA22:6	uM	0.0147	0.0181	0.0064	0.0248	0.0242	0.4784	0.0801	0.5236	0.3233	0.1887	0.6668	0.4593	0.5882	0.0631	0.0086	0.0936	0.0077	0.0226	0.0375	0.1875	0.0648
TAG	TAG52:7FA16:0	uM	0.0046	0.0092	0.003	0.006	0.0051	0.0518	0.0096	0.0505	0.0281	0.0159	0.0593	0.0427	0.065	0.0103	0.0032	0.0145	0.003	0.0051	0.006	0.0243	0.0109
TAG	TAG52:7FA18:1	uM	0.0027	0.0039	0.0017	0.0029	0.0033	0.0471	0.0071	0.048	0.0422	0.0157	0.0552	0.0373	0.0476	0.0075	0.0027	0.01	0.002	0.003	0.0047	0.019	0.0078
TAG	TAG52:7FA20:5	uM	0.0067	0.0087	0.0034	0.0122	0.0118	0.1301	0.0177	0.1546	0.0851	0.05	0.1601	0.1285	0.1879	0.0129	0.0048	0.0391	0.0027	0.006	0.0086	0.0569	0.0188
TAG	TAG52:7FA22:6	uM	0.0074	0.0091	0.003	0.0114	0.0099	0.2228	0.0448	0.2554	0.1919	0.1021	0.2841	0.2096	0.2757	0.031	0.0041	0.0468	0.0041	0.0091	0.0155	0.086	0.028
TAG	TAG52:8FA16:1	uM	0.0015	0.0021	0.001	0.0018	0.0017	0.0144	0.0018	0.0116	0.0107	0.0068	0.016	0.0151	0.0146	0.0024	0.0011	0.003	0.0011	0.0014	0.0015	0.006	0.0021
TAG	TAG52:8FA18:2	uM	0.0038	0.0064	0.0031	0.0055	0.0047	0.0771	0.014	0.0821	0.0708	0.0232	0.1047	0.0693	0.0895	0.012	0.0039	0.0205	0.0024	0.0058	0.0082	0.0311	0.0168
TAG	TAG53:0FA16:0	uM	0.0607	0.0985	0.0414	0.1436	0.1301	0.9462	0.1773	1.0366	0.4226	0.3845	1.0394	1.0192	1.5922	0.1461	0.0521	0.4019	0.0224	0.0682	0.1005	0.5846	0.2242
TAG	TAG53:1FA16:0	uM	0.0084	0.0125	0.0046	0.0121	0.0127	0.1074	0.022	0.1082	0.0585	0.0361	0.1162	0.1099	0.1431	0.0195	0.0064	0.0307	0.0047	0.0105	0.0125	0.0518	0.0236
TAG	TAG53:1FA17:0	uM	0.0037	0.0049	0.0022	0.0042	0.0041	0.0364	0.0058	0.0218	0.0167	0.0123	0.0322	0.0307	0.0253	0.0067	0.0032	0.0068	0.0027	0.0033	0.0038	0.0139	0.0079
TAG	TAG53:1FA18:0	uM	0.0056	0.0075	0.0036	0.0055	0.0049	0.037	0.0078	0.0242	0.0166	0.0117	0.0291	0.0275	0.0283	0.0067	0.0036	0.0096	0.0037	0.0047	0.0052	0.0112	0.0085
TAG	TAG53:1FA18:1	uM	0.0132	0.0152	0.0073	0.0146	0.0131	0.1201	0.0195	0.0885	0.057	0.0384	0.0965	0.1079	0.0992	0.0176	0.0107	0.0266	0.0076	0.0132	0.014	0.0504	0.0265
TAG	TAG53:2FA16:0	uM	0.0185	0.0314	0.0099	0.0304	0.0284	0.2307	0.0502	0.1838	0.0914	0.0875	0.1894	0.227	0.2221	0.0442	0.0147	0.062	0.0088	0.0228	0.0309	0.1167	0.062
TAG	TAG53:2FA17:0	uM	0.024	0.0421	0.0132	0.0378	0.0339	0.2894	0.051	0.1874	0.1235	0.1043	0.2672	0.2621	0.2181	0.047	0.0185	0.0635	0.0114	0.0264	0.0335	0.1118	0.06
TAG	TAG53:2FA18:0	uM	0.0302	0.0415	0.0258	0.0387	0.0356	0.0953	0.0334	0.072	0.0634	0.0528	0.0926	0.0864	0.0702	0.0358	0.0314	0.0353	0.0296	0.0322	0.0425	0.054	0.0502
TAG	TAG53:2FA18:1	uM	0.0619	0.0974	0.0376	0.0944	0.087	0.6662	0.1177	0.4374	0.2566	0.2498	0.5548	0.5958	0.501	0.1074	0.0519	0.151	0.0351	0.067	0.0835	0.2792	0.1591
TAG	TAG53:2FA18:2	uM	0.0213	0.0257	0.0134	0.0224	0.022	0.1687	0.0372	0.1433	0.0984	0.051	0.1713	0.1494	0.173	0.0344	0.0163	0.0458	0.012	0.0205	0.0241	0.076	0.0476
TAG	TAG53:3FA16:0	uM	0.0149	0.0343	0.0124	0.0379	0.0366	0.3156	0.0599	0.2407	0.1214	0.1032	0.2664	0.2944	0.303	0.0552	0.0176	0.0933	0.0097	0.0277	0.0441	0.1603	0.0892
TAG	TAG53:3FA17:0	uM	0.04	0.0891	0.0272	0.0787	0.0766	0.7201	0.1222	0.4817	0.3222	0.2215	0.6789	0.6068	0.5756	0.1131	0.0381	0.1742	0.023	0.0615	0.0863	0.2893	0.1677
TAG	TAG53:3FA18:0	uM	0.4446	0.5505	0.4566	0.5617	0.5575	0.5952	0.4464	0.5789	0.5859	0.6201	0.6263	0.6304	0.5648	0.4918	0.5139	0.4661	0.4766	0.5108	0.6634	0.6068	0.731
TAG	TAG53:3FA18:1	uM	0.3799	0.5269	0.3707	0.5266	0.5151	1.5344	0.4612	1.154	0.8943	0.8994	1.4635	1.4338	1.2426	0.5108	0.4085	0.5689	0.3753	0.4484	0.6002	0.9027	0.7532
TAG	TAG53:3FA18:2	uM	0.0541	0.1146	0.0396	0.1048	0.0988	0.926	0.1626	0.6506	0.3916	0.2895	0.8165	0.8207	0.7897	0.1516	0.0537	0.233	0.0335	0.092	0.112	0.3995	0.2292
TAG	TAG53:4FA16:0	uM	0.0052	0.0112	0.0039	0.0117	0.0114	0.0993	0.014	0.0696	0.035	0.0317	0.0817	0.0838	0.0926	0.0162	0.0048	0.0271	0.0029	0.0088	0.0134	0.0483	0.0297
TAG	TAG53:4FA17:0	uM	0.022	0.0544	0.0196	0.0513	0.0518	0.4755	0.0881	0.3596	0.2227	0.1175	0.4493	0.4036	0.4524	0.0792	0.0265	0.1343	0.0134	0.0488	0.07	0.2005	0.1271
TAG	TAG53:4FA18:0	uM	0.056	0.0854	0.062	0.0798	0.0764	0.0883	0.059	0.0834	0.0822	0.0846	0.0907	0.0877	0.0784	0.0721	0.0706	0.0672	0.0624	0.0729	0.0959	0.0877	0.0987
TAG	TAG53:4FA18:1	uM	0.8775	1.2041	0.9139	1.1829	1.1947	1.8168	0.9383	1.6257	1.4461	1.5241	1.9214	1.823	1.6277	1.1015	1.081	1.061	0.9446	1.0564	1.4802	1.5	1.6689
TAG	TAG53:4FA18:2	uM	0.0774	0.1612	0.0687	0.1708	0.1625	1.3753	0.2157	1.0102	0.6551	0.4949	1.4038	1.2511	1.2235	0.2226	0.0869	0.3611	0.0551	0.1443	0.2054	0.6234	0.3747
TAG	TAG53:4FA18:3	uM	0.0055	0.0088	0.0035	0.0087	0.0081	0.0722	0.0082	0.0533	0.0317	0.0205	0.0742	0.064	0.0655	0.01	0.0044	0.0182	0.0032	0.0076	0.0086	0.0324	0.0176
TAG	TAG53:4FA20:4	uM	0.0019	0.0023	0.0009	0.002	0.0019	0.0132	0.0034	0.0107	0.0084	0.0063	0.0126	0.0124	0.0169	0.0029	0.0019	0.0034	0.0011	0.0016	0.0017	0.0051	0.0041
TAG	TAG53:5FA18:1	uM	0.4687	0.6478	0.5043	0.6179	0.6215	0.7622	0.4607	0.722	0.6937	0.7016	0.802	0.752	0.7011	0.5605	0.5756	0.5403	0.5064	0.5267	0.7586	0.7417	0.8306
TAG	TAG53:5FA18:2	uM	0.5826	0.8292	0.6269	0.8239	0.8343	1.4749	0.6235	1.3186	1.1498	1.0834	1.6819	1.5055	1.4715	0.7789	0.7044	0.8303	0.6283	0.6896	0.9707	1.1613	1.174
TAG	TAG53:5FA18:3	uM	0.0132	0.0188	0.0097	0.0205	0.0187	0.1122	0.0157	0.0972	0.0682	0.0494	0.1545	0.1181	0.1179	0.0204	0.0117	0.0352	0.0094	0.0135	0.0213	0.0589	0.0351
TAG	TAG53:5FA20:4	uM	0.0041	0.0056	0.0018	0.0052	0.0049	0.0387	0.0064	0.0246	0.0172	0.0276	0.0397	0.0318	0.0389	0.0057	0.0026	0.0079	0.002	0.0034	0.004	0.0152	0.0074
TAG	TAG53:6FA18:1	uM	0.1332	0.1892	0.1525	0.1767	0.1832	0.2208	0.1429	0.1972	0.1929	0.2092	0.237	0.2181	0.205	0.1654	0.1628	0.1632	0.156	0.1592	0.2234	0.2139	0.2448
TAG	TAG53:6FA18:2	uM	0.0727	0.111	0.077	0.1035	0.1046	0.2268	0.0819	0.2167	0.1741	0.1565	0.3057	0.2191	0.2314	0.1007	0.0894	0.1166	0.0794	0.0868	0.1344	0.1783	0.1518
TAG	TAG53:6FA18:3	uM	0.1354	0.1962	0.1504	0.1928	0.1938	0.2768	0.1473	0.2545	0.2226	0.2312	0.3147	0.2671	0.2606	0.1708	0.1748	0.1781	0.1618	0.1663	0.2376	0.2437	0.2692
TAG	TAG53:6FA20:4	uM	0.0033	0.0054	0.0025	0.0059	0.0053	0.0428	0.0093	0.0302	0.0255	0.0252	0.0412	0.0382	0.0461	0.0061	0.003	0.011	0.0015	0.0036	0.0039	0.0169	0.0093
TAG	TAG53:7FA18:3	uM	0.0163	0.0252	0.0181	0.0214	0.0219	0.0312	0.0171	0.0307	0.0316	0.0258	0.0413	0.0334	0.0317	0.0204	0.0204	0.0211	0.019	0.0201	0.0281	0.0273	0.031
TAG	TAG54:0FA16:0	uM	0.0106	0.0147	0.0055	0.0181	0.0161	0.1094	0.0169	0.0848	0.0347	0.0346	0.083	0.109	0.1356	0.0196	0.0064	0.0398	0.004	0.0134	0.0192	0.071	0.0393
TAG	TAG54:0FA18:0	uM	0.0036	0.007	0.0025	0.0042	0.0038	0.0178	0.0057	0.0136	0.0109	0.0097	0.0139	0.0184	0.0126	0.0065	0.0026	0.0055	0.0027	0.003	0.0047	0.0099	0.0043
TAG	TAG54:1FA16:0	uM	0.0247	0.0263	0.0107	0.0268	0.0233	0.156	0.0342	0.1171	0.0765	0.1139	0.1361	0.202	0.1334	0.0408	0.0143	0.0364	0.0103	0.0214	0.0246	0.0905	0.0409
TAG	TAG54:1FA18:0	uM	0.0165	0.0286	0.0105	0.0231	0.0224	0.2487	0.0369	0.1579	0.0945	0.0714	0.1628	0.1942	0.1261	0.0394	0.0137	0.0384	0.0091	0.0213	0.0259	0.0786	0.0384
TAG	TAG54:1FA18:1	uM	0.0302	0.0449	0.0173	0.0388	0.0401	0.3181	0.0518	0.2096	0.138	0.143	0.2263	0.2981	0.1913	0.0628	0.0243	0.0581	0.0172	0.035	0.0417	0.1383	0.0654
TAG	TAG54:1FA20:0	uM	0.0319	0.0309	0.0147	0.0394	0.0363	0.2846	0.0447	0.2005	0.1038	0.1352	0.2325	0.3105	0.2482	0.0655	0.0216	0.0649	0.012	0.0281	0.0502	0.1576	0.0798
TAG	TAG54:1FA20:1	uM	0.0099	0.0116	0.0039	0.0116	0.0125	0.0817	0.0151	0.0653	0.0307	0.0533	0.058	0.0912	0.0695	0.0163	0.0061	0.0215	0.004	0.0079	0.0114	0.0467	0.0209
TAG	TAG54:2FA16:0	uM	0.0914	0.1341	0.0391	0.1224	0.1201	0.7942	0.1787	0.6489	0.366	0.6068	0.7213	1.0163	0.7076	0.1808	0.0597	0.2039	0.0366	0.0937	0.1163	0.4953	0.2185
TAG	TAG54:2FA18:0	uM	0.0972	0.218	0.0653	0.1767	0.1659	1.967	0.2451	1.1842	0.73	0.5652	1.2629	1.482	1.0182	0.2838	0.0971	0.2865	0.0577	0.1401	0.1989	0.6027	0.2994
TAG	TAG54:2FA18:1	uM	0.2277	0.4564	0.1233	0.3937	0.3861	4.4144	0.5115	2.6999	1.6548	1.612	2.8187	3.7084	2.3915	0.5966	0.1866	0.6724	0.1137	0.3134	0.4169	1.624	0.6926
TAG	TAG54:2FA18:2	uM	0.0391	0.0673	0.0268	0.0578	0.0579	0.5671	0.099	0.3907	0.2579	0.2166	0.4463	0.5466	0.3976	0.1168	0.0384	0.1124	0.0218	0.0578	0.0739	0.2426	0.1174
TAG	TAG54:2FA20:0	uM	0.0373	0.0512	0.0245	0.0597	0.0568	0.4494	0.0906	0.3563	0.2311	0.248	0.4427	0.5406	0.433	0.1107	0.035	0.1199	0.0177	0.0517	0.0846	0.2674	0.134
TAG	TAG54:2FA20:1	uM	0.1014	0.126	0.0422	0.1363	0.1383	0.8839	0.1694	0.7366	0.3379	0.6154	0.7327	1.0271	0.8323	0.1766	0.065	0.2368	0.0391	0.0952	0.1225	0.5515	0.2409
TAG	TAG54:2FA20:2	uM	0.006	0.0078	0.003	0.0091	0.0084	0.06	0.0115	0.0468	0.0254	0.0404	0.056	0.072	0.0499	0.01	0.0039	0.0135	0.0026	0.0063	0.0081	0.0309	0.0144
TAG	TAG54:3FA16:0	uM	0.1354	0.2331	0.0765	0.2334	0.2186	1.5503	0.3189	1.3609	0.7097	1.1184	1.5159	1.88	1.5805	0.3361	0.1076	0.4301	0.0626	0.1869	0.2326	0.9442	0.4476
TAG	TAG54:3FA16:1	uM	0.0153	0.0203	0.0056	0.019	0.0177	0.1509	0.0238	0.1324	0.1097	0.1948	0.1711	0.2175	0.1194	0.0274	0.0083	0.0284	0.0053	0.0111	0.0146	0.0845	0.0314
TAG	TAG54:3FA18:0	uM	0.2153	0.5011	0.1653	0.4539	0.4337	4.8366	0.5791	3.1232	1.9312	1.1657	3.2573	3.7387	2.887	0.7257	0.2379	0.8836	0.1379	0.4147	0.5891	1.6464	0.8895
TAG	TAG54:3FA18:1	uM	1.113	2.6956	0.639	2.3802	2.215	27.674	2.8857	17.8713	11.3142	10.7264	18.7106	23.7021	15.9338	3.8213	1.0406	4.2287	0.6384	1.7896	2.6241	10.3865	4.6768
TAG	TAG54:3FA18:2	uM	0.2535	0.6248	0.2074	0.5778	0.5259	6.0399	0.8036	4.2964	2.5252	1.8793	4.3083	5.1402	3.9256	0.9678	0.2821	1.1994	0.1577	0.5335	0.7392	2.463	1.2047
TAG	TAG54:3FA18:3	uM	0.0045	0.0078	0.0037	0.0075	0.0067	0.0482	0.0062	0.0345	0.024	0.0158	0.0448	0.0418	0.033	0.0102	0.0053	0.011	0.0037	0.006	0.0079	0.0215	0.0115
TAG	TAG54:3FA20:1	uM	0.1192	0.2262	0.0732	0.2257	0.2182	1.4667	0.3132	1.3967	0.7265	1.1232	1.4941	1.8183	1.5618	0.3376	0.1063	0.4646	0.0576	0.1785	0.2279	1.006	0.4764
TAG	TAG54:3FA20:2	uM	0.0648	0.0903	0.0294	0.0939	0.0924	0.6123	0.1044	0.4669	0.2703	0.4639	0.6027	0.7209	0.5862	0.1146	0.0355	0.1495	0.024	0.0689	0.0802	0.3555	0.1617
TAG	TAG54:3FA20:3	uM	0.0114	0.0159	0.0056	0.0168	0.0152	0.0934	0.015	0.0764	0.0396	0.06	0.084	0.0998	0.0888	0.0194	0.0075	0.0244	0.0039	0.0118	0.0125	0.0514	0.0269
TAG	TAG54:4FA16:0	uM	0.1185	0.1982	0.0632	0.2198	0.2136	1.3045	0.2348	1.1152	0.6879	0.8884	1.4477	1.5276	1.4181	0.2655	0.0932	0.3506	0.0493	0.1651	0.2014	0.7949	0.393
TAG	TAG54:4FA16:1	uM	0.0166	0.0337	0.0088	0.0316	0.0321	0.2786	0.0392	0.2358	0.2135	0.3293	0.3362	0.3593	0.24	0.0455	0.0119	0.0546	0.0076	0.0203	0.0222	0.15	0.0589
TAG	TAG54:4FA18:0	uM	0.1167	0.3209	0.1254	0.3198	0.2962	3.0694	0.4588	2.3432	1.3136	0.6429	2.4417	2.5861	2.3184	0.5584	0.1577	0.7138	0.0924	0.3216	0.4649	1.2675	0.7429
TAG	TAG54:4FA18:1	uM	1.4894	4.791	1.1562	4.4346	4.1234	50.2147	6.0216	36.6293	24.0088	17.5806	38.712	45.0475	35.5053	7.7746	1.8184	9.3542	1.0968	3.7743	5.635	21.2585	10.2963
TAG	TAG54:4FA18:2	uM	0.8577	2.7408	0.7043	2.4687	2.3348	30.5014	3.6172	22.2663	13.7972	9.6217	22.5404	26.6084	20.6456	4.6789	1.092	5.8274	0.6448	2.2936	3.3723	12.507	6.2184
TAG	TAG54:4FA18:3	uM	0.0261	0.0589	0.0164	0.0551	0.0475	0.594	0.0573	0.4214	0.254	0.1685	0.503	0.5274	0.4471	0.0802	0.0231	0.1149	0.0115	0.0436	0.06	0.2407	0.1156
TAG	TAG54:4FA20:1	uM	0.0183	0.0343	0.0096	0.0333	0.0319	0.2848	0.0429	0.2895	0.219	0.3201	0.3876	0.388	0.2853	0.0467	0.0127	0.0689	0.0087	0.0229	0.0306	0.1753	0.07
TAG	TAG54:4FA20:2	uM	0.0666	0.1226	0.0447	0.1371	0.1247	0.9547	0.1732	0.8738	0.5196	0.7231	1.2132	1.1613	0.997	0.1831	0.0579	0.2574	0.0348	0.1095	0.1327	0.5618	0.2657
TAG	TAG54:4FA20:3	uM	0.1028	0.1494	0.0435	0.1598	0.1528	0.8189	0.1308	0.6434	0.3846	0.5867	0.8636	0.9102	0.8403	0.1674	0.0664	0.2173	0.0322	0.1008	0.1121	0.4957	0.2267
TAG	TAG54:4FA20:4	uM	0.0292	0.044	0.0158	0.0496	0.0441	0.3656	0.089	0.3043	0.1362	0.1783	0.2801	0.3531	0.3812	0.0671	0.0209	0.0971	0.013	0.0329	0.0454	0.1635	0.0825
TAG	TAG54:4FA22:1	uM	0.0044	0.0111	0.0032	0.0111	0.0118	0.1418	0.0163	0.1066	0.0678	0.049	0.1145	0.1292	0.1023	0.0203	0.0044	0.027	0.0029	0.0107	0.0153	0.0604	0.0286
TAG	TAG54:4FA22:4	uM	0.0028	0.004	0.0011	0.0049	0.0043	0.0377	0.0056	0.0312	0.0138	0.0179	0.0281	0.0334	0.0376	0.0063	0.0019	0.0091	0.0017	0.0037	0.0052	0.0164	0.0082
TAG	TAG54:5FA16:0	uM	0.1247	0.2182	0.0725	0.2575	0.2403	1.6522	0.2736	1.399	0.7875	0.901	1.7744	1.7224	1.9266	0.288	0.1008	0.4536	0.0528	0.1796	0.2072	0.9195	0.4233
TAG	TAG54:5FA16:1	uM	0.015	0.0334	0.0071	0.0302	0.0284	0.2605	0.0309	0.2292	0.2018	0.2776	0.3404	0.2923	0.2474	0.0384	0.0104	0.0517	0.0079	0.0191	0.0251	0.1332	0.0544
TAG	TAG54:5FA18:0	uM	0.0176	0.0381	0.0139	0.0415	0.0405	0.4462	0.0436	0.3599	0.2073	0.1162	0.4185	0.3678	0.3892	0.0545	0.0186	0.0973	0.01	0.0363	0.0494	0.1773	0.0829
TAG	TAG54:5FA18:1	uM	0.7087	2.5458	0.6701	2.4327	2.2438	34.2484	3.6681	25.9012	16.1899	9.4564	26.2732	28.6207	25.6638	4.8557	1.0101	6.6596	0.5933	2.5291	4.0241	14.3786	7.108
TAG	TAG54:5FA18:2	uM	0.9827	3.8172	1.0827	3.578	3.4591	49.5802	5.8639	38.1616	24.6402	13.7817	38.233	42.8373	38.6805	7.6781	1.5755	10.4008	0.9172	4.2093	6.5362	21.9545	11.1966
TAG	TAG54:5FA18:3	uM	0.12	0.2839	0.0806	0.2879	0.2693	3.4573	0.2891	2.6219	1.5731	1.0787	3.0133	3.0684	2.9317	0.4213	0.1078	0.6662	0.0582	0.2341	0.3553	1.5459	0.6646
TAG	TAG54:5FA20:2	uM	0.0101	0.0233	0.0066	0.0249	0.0222	0.2202	0.0286	0.1944	0.1613	0.2093	0.2865	0.2609	0.2189	0.0328	0.009	0.0469	0.0056	0.0184	0.0223	0.1142	0.0531
TAG	TAG54:5FA20:3	uM	0.1084	0.199	0.0683	0.2428	0.229	1.3479	0.2213	1.1297	0.7321	0.9191	1.6286	1.4981	1.475	0.2645	0.0903	0.3906	0.0474	0.1663	0.1893	0.8146	0.4036
TAG	TAG54:5FA20:4	uM	0.1983	0.2639	0.0904	0.3184	0.3103	2.056	0.4434	1.5714	0.7866	1.1637	1.6637	1.9874	2.3358	0.3781	0.1288	0.545	0.0726	0.1814	0.2123	1.0031	0.4765
TAG	TAG54:5FA20:5	uM	0.0168	0.0176	0.0072	0.0247	0.0248	0.1619	0.0361	0.1525	0.0488	0.0478	0.1237	0.1574	0.2336	0.0247	0.0099	0.0556	0.0047	0.0115	0.0177	0.0897	0.0375
TAG	TAG54:5FA22:1	uM	0.0052	0.0187	0.0053	0.0194	0.0179	0.2534	0.028	0.2156	0.1325	0.0742	0.218	0.2259	0.2124	0.0377	0.0067	0.0535	0.0047	0.0204	0.0311	0.1203	0.0622
TAG	TAG54:5FA22:4	uM	0.0037	0.005	0.0011	0.0055	0.0056	0.051	0.0062	0.0374	0.0217	0.0346	0.0387	0.0458	0.0516	0.0068	0.002	0.01	0.0018	0.0032	0.0029	0.0208	0.0092
TAG	TAG54:5FA22:5	uM	0.0171	0.0297	0.0082	0.0328	0.0307	0.3246	0.055	0.3442	0.1529	0.1351	0.3544	0.3404	0.4174	0.0533	0.0124	0.0944	0.0079	0.0284	0.0427	0.177	0.0838
TAG	TAG54:6FA16:0	uM	0.1167	0.1894	0.0709	0.2374	0.2253	2.0735	0.4127	1.864	0.9466	0.8612	2.1754	2.0388	2.7335	0.3282	0.0908	0.6105	0.0507	0.1574	0.2114	1.0517	0.46
TAG	TAG54:6FA16:1	uM	0.0183	0.0313	0.0079	0.0325	0.0339	0.316	0.0348	0.2844	0.2234	0.2961	0.4331	0.359	0.3652	0.0407	0.0117	0.0703	0.0071	0.0202	0.0269	0.1701	0.0637
TAG	TAG54:6FA18:1	uM	0.1663	0.4028	0.1156	0.4651	0.4522	5.4417	0.4589	4.7277	2.8439	1.7333	5.5271	5.0954	5.6663	0.6321	0.1606	1.2393	0.0816	0.356	0.5486	2.6921	1.1619
TAG	TAG54:6FA18:2	uM	0.463	1.9272	0.618	1.9763	2.0192	30.6582	3.6879	26.8345	18.1396	7.6678	26.4227	27.0295	27.7168	4.7406	0.8644	7.1284	0.5022	2.737	4.5648	14.3755	8.0942
TAG	TAG54:6FA18:3	uM	0.1534	0.4224	0.1164	0.4614	0.4475	5.5104	0.4349	4.8764	3.0372	1.6058	5.7279	5.1267	5.7956	0.6483	0.1638	1.3096	0.0827	0.3841	0.5844	2.8262	1.2322
TAG	TAG54:6FA20:3	uM	0.0155	0.0308	0.0082	0.0337	0.0324	0.2761	0.0322	0.2567	0.2148	0.2524	0.4085	0.3226	0.2949	0.0365	0.012	0.0616	0.0067	0.023	0.0291	0.1515	0.0624
TAG	TAG54:6FA20:4	uM	0.2466	0.403	0.1601	0.5056	0.5068	3.5737	0.8884	2.7988	1.4827	1.9426	3.0904	3.4039	4.4754	0.7024	0.2104	1.1169	0.1104	0.3145	0.4009	1.7005	0.8894
TAG	TAG54:6FA20:5	uM	0.1666	0.1896	0.0724	0.2775	0.2648	1.6751	0.3401	1.6722	0.5145	0.5592	1.3367	1.7618	2.5721	0.2735	0.1028	0.6696	0.0479	0.1249	0.1827	1.0404	0.4092
TAG	TAG54:6FA22:5	uM	0.024	0.0305	0.0077	0.0401	0.0372	0.3328	0.0477	0.3466	0.1806	0.1802	0.3787	0.356	0.4286	0.0466	0.0118	0.0949	0.0075	0.0201	0.0324	0.1924	0.0762
TAG	TAG54:6FA22:6	uM	0.0862	0.1757	0.0464	0.1806	0.1715	2.3242	0.4396	2.3047	1.3164	0.8938	2.823	2.226	2.8193	0.3783	0.0673	0.6339	0.049	0.1816	0.2796	1.0358	0.5056
TAG	TAG54:7FA16:1	uM	0.0271	0.0311	0.0098	0.0396	0.0396	0.4037	0.0519	0.4287	0.2861	0.3132	0.5623	0.4633	0.5365	0.0483	0.0129	0.101	0.009	0.0222	0.0317	0.2131	0.0739
TAG	TAG54:7FA18:1	uM	0.0268	0.0447	0.0122	0.0484	0.0499	0.5505	0.0479	0.5089	0.3291	0.1753	0.588	0.4824	0.6192	0.0673	0.0162	0.14	0.0092	0.0364	0.0516	0.2809	0.1062
TAG	TAG54:7FA18:2	uM	0.1424	0.4051	0.1343	0.4823	0.4764	5.4782	0.4677	5.5136	3.0369	1.4583	5.8576	5.0334	6.9016	0.6343	0.1619	1.6785	0.0771	0.4021	0.6542	3.0429	1.3585
TAG	TAG54:7FA18:3	uM	0.0726	0.2206	0.0712	0.2803	0.271	3.3434	0.245	3.2399	1.8753	0.8062	3.6006	2.9796	3.9984	0.3848	0.0912	0.9336	0.049	0.2546	0.3875	1.8378	0.8207
TAG	TAG54:7FA20:4	uM	0.0313	0.0529	0.0159	0.063	0.0595	0.5807	0.075	0.4846	0.4117	0.4959	0.6784	0.5602	0.6696	0.0694	0.0242	0.1358	0.0115	0.0329	0.0446	0.2601	0.0971
TAG	TAG54:7FA20:5	uM	0.2165	0.3402	0.1544	0.528	0.4933	3.3823	0.6705	3.626	1.1756	1.0241	2.8623	3.3573	5.5608	0.4796	0.1908	1.4996	0.0812	0.2204	0.3517	1.9398	0.8
TAG	TAG54:7FA22:5	uM	0.0106	0.0162	0.0048	0.0223	0.019	0.2257	0.0405	0.2464	0.1668	0.1096	0.2525	0.2178	0.2876	0.0312	0.0069	0.0673	0.0046	0.0172	0.0243	0.1115	0.05
TAG	TAG54:7FA22:6	uM	0.1535	0.1806	0.0464	0.2329	0.2161	2.1269	0.3297	2.1731	1.4349	1.3454	2.6121	2.1588	2.751	0.2811	0.0698	0.5588	0.0548	0.1414	0.2048	1.2123	0.4199
TAG	TAG54:8FA18:2	uM	0.0218	0.0416	0.0148	0.055	0.055	0.545	0.0688	0.5861	0.3968	0.1932	0.6443	0.5098	0.7226	0.0727	0.0184	0.1779	0.0103	0.0439	0.0641	0.3137	0.1295
TAG	TAG54:8FA18:3	uM	0.0147	0.0372	0.011	0.046	0.044	0.4401	0.0237	0.4818	0.2572	0.1204	0.5947	0.44	0.6952	0.0414	0.0129	0.1346	0.006	0.0298	0.047	0.2573	0.1041
TAG	TAG54:8FA20:4	uM	0.0028	0.0052	0.0019	0.0046	0.0051	0.0659	0.0082	0.0564	0.0623	0.0492	0.0846	0.0644	0.0766	0.0079	0.0025	0.0144	0.0017	0.0039	0.0063	0.0259	0.0113
TAG	TAG54:8FA20:5	uM	0.0289	0.038	0.0158	0.0525	0.0509	0.4469	0.0612	0.547	0.2715	0.2329	0.5836	0.5028	0.7598	0.0479	0.0186	0.1733	0.0082	0.0218	0.0358	0.2581	0.0871
TAG	TAG54:8FA22:6	uM	0.0655	0.0982	0.0307	0.1151	0.1101	1.1877	0.2464	1.3001	1.2154	0.7356	1.6215	1.1814	1.5373	0.2239	0.0387	0.4016	0.0285	0.0988	0.1662	0.634	0.2944
TAG	TAG55:1FA16:0	uM	0.2637	0.5432	0.2192	0.705	0.6863	3.8452	1.1455	4.2704	2.1396	1.774	3.739	4.0862	5.9552	1.1036	0.2538	2.107	0.1716	0.6074	0.99	3.0987	1.7129
TAG	TAG55:1FA18:1	uM	0.0439	0.078	0.0255	0.0802	0.0823	0.7972	0.1422	0.815	0.4372	0.414	0.7415	0.8183	0.8893	0.1401	0.0324	0.2483	0.0229	0.0579	0.0977	0.4416	0.1843
TAG	TAG55:2FA18:1	uM	0.0088	0.0155	0.0064	0.0124	0.0145	0.1313	0.0219	0.1201	0.0885	0.0576	0.1177	0.1244	0.1222	0.027	0.0079	0.0321	0.0055	0.0123	0.0171	0.0618	0.0318
TAG	TAG55:2FA18:2	uM	0.0411	0.0853	0.03	0.0991	0.0988	0.9648	0.189	1.07	0.6574	0.4573	0.9767	1.0028	1.3039	0.1787	0.0379	0.3594	0.0231	0.081	0.1341	0.5838	0.273
TAG	TAG55:3FA18:1	uM	0.0114	0.0238	0.0073	0.0196	0.0219	0.2116	0.0352	0.1466	0.1076	0.0912	0.1638	0.1874	0.1276	0.0399	0.0122	0.0429	0.0089	0.0186	0.0255	0.0792	0.0474
TAG	TAG55:3FA18:2	uM	0.0113	0.02	0.0084	0.0184	0.018	0.1629	0.031	0.155	0.1293	0.0682	0.1663	0.1529	0.1742	0.0342	0.0121	0.0535	0.0081	0.0187	0.0265	0.0815	0.0476
TAG	TAG55:4FA18:1	uM	0.0074	0.0235	0.0064	0.0191	0.0198	0.2395	0.0353	0.1733	0.1338	0.0916	0.1983	0.2097	0.1553	0.0428	0.01	0.0481	0.007	0.0188	0.0296	0.0932	0.0521
TAG	TAG55:4FA18:2	uM	0.0095	0.0263	0.0088	0.0235	0.0221	0.2575	0.0458	0.1891	0.1437	0.0902	0.1971	0.2281	0.1823	0.0509	0.0131	0.0622	0.0089	0.0247	0.0385	0.1056	0.065
TAG	TAG55:5FA18:1	uM	0.0059	0.0123	0.0049	0.0114	0.0111	0.0895	0.0136	0.0682	0.0501	0.0356	0.0744	0.0742	0.0651	0.0155	0.0059	0.0205	0.0058	0.0094	0.0153	0.04	0.022
TAG	TAG55:5FA18:2	uM	0.0061	0.0215	0.0075	0.0197	0.0191	0.255	0.041	0.208	0.1613	0.0792	0.2369	0.2305	0.1902	0.0464	0.0101	0.0609	0.0061	0.0234	0.0364	0.106	0.0637
TAG	TAG55:5FA20:4	uM	0.0036	0.0048	0.002	0.0053	0.0048	0.0331	0.0083	0.0239	0.0198	0.0235	0.0307	0.0305	0.0347	0.006	0.0023	0.0091	0.0019	0.0032	0.004	0.0141	0.0078
TAG	TAG55:6FA18:1	uM	0.0644	0.0912	0.0649	0.0885	0.087	0.1499	0.0675	0.1308	0.095	0.1082	0.1292	0.1471	0.147	0.0862	0.0796	0.0844	0.0688	0.0755	0.1011	0.1249	0.1231
TAG	TAG55:6FA20:3	uM	0.1082	0.1524	0.1174	0.1457	0.1419	0.1634	0.1102	0.155	0.1447	0.1714	0.1703	0.1568	0.1487	0.137	0.1343	0.1233	0.1193	0.1201	0.1762	0.1698	0.177
TAG	TAG55:6FA20:4	uM	0.0098	0.0139	0.0077	0.0148	0.0148	0.0572	0.0188	0.0402	0.0369	0.0425	0.0601	0.0549	0.0593	0.0169	0.0108	0.0186	0.0082	0.011	0.0157	0.0277	0.0204
TAG	TAG55:7FA15:0	uM	0.007	0.0077	0.0036	0.0086	0.0086	0.0507	0.0115	0.0406	0.0221	0.0251	0.0439	0.0472	0.0526	0.0116	0.0042	0.0167	0.0048	0.0066	0.0089	0.0273	0.0162
TAG	TAG55:7FA18:1	uM	0.0401	0.0502	0.0397	0.0526	0.0522	0.1013	0.0427	0.0948	0.0717	0.078	0.0964	0.0975	0.0947	0.0529	0.0483	0.0511	0.039	0.0463	0.0665	0.0753	0.0748
TAG	TAG55:7FA20:3	uM	0.0143	0.0197	0.0152	0.0198	0.0172	0.0184	0.0136	0.0202	0.0195	0.0223	0.0257	0.0212	0.0198	0.0178	0.0171	0.0175	0.0157	0.0156	0.0242	0.0223	0.023
TAG	TAG55:7FA20:4	uM	0.1635	0.2122	0.1674	0.2177	0.2153	0.2402	0.1673	0.242	0.2226	0.2569	0.2615	0.2525	0.228	0.195	0.1973	0.1811	0.1811	0.1891	0.27	0.2469	0.2857
TAG	TAG55:7FA22:6	uM	0.0305	0.036	0.0128	0.0395	0.0403	0.2789	0.0662	0.2294	0.1657	0.1631	0.3232	0.2867	0.3256	0.0545	0.0164	0.0946	0.0146	0.0296	0.043	0.1589	0.0851
TAG	TAG55:8FA20:4	uM	0.0225	0.0272	0.0213	0.0261	0.0262	0.0279	0.0186	0.0312	0.0324	0.0321	0.034	0.0355	0.0307	0.0254	0.0237	0.0249	0.0226	0.0226	0.0294	0.0325	0.0367
TAG	TAG56:1FA16:0	uM	0.004	0.0034	0.0014	0.0027	0.0031	0.0171	0.0054	0.0128	0.0098	0.0201	0.0159	0.0236	0.0173	0.0062	0.0015	0.0057	0.0013	0.0024	0.0035	0.0129	0.006
TAG	TAG56:1FA18:1	uM	0.0089	0.0133	0.0046	0.0117	0.0117	0.0836	0.0153	0.0711	0.0482	0.0501	0.0709	0.0863	0.0749	0.0213	0.0058	0.0236	0.0043	0.0108	0.0157	0.0468	0.0274
TAG	TAG56:10FA18:2	uM	0.0092	0.0153	0.0063	0.016	0.0148	0.1306	0.0253	0.1328	0.1085	0.0526	0.1422	0.1256	0.1474	0.0283	0.0091	0.0461	0.0059	0.0129	0.0216	0.0664	0.0414
TAG	TAG56:2FA16:0	uM	0.0108	0.0096	0.0033	0.0092	0.0093	0.0532	0.0181	0.0507	0.043	0.0985	0.0566	0.0946	0.0571	0.0179	0.0058	0.0124	0.0034	0.0076	0.0088	0.0468	0.0185
TAG	TAG56:2FA18:0	uM	0.0067	0.012	0.0045	0.0103	0.0088	0.085	0.0151	0.0538	0.0412	0.0493	0.0525	0.0905	0.0404	0.0172	0.0061	0.0141	0.0036	0.0094	0.0107	0.0303	0.0164
TAG	TAG56:2FA18:1	uM	0.0558	0.0803	0.0452	0.075	0.0762	0.3258	0.0786	0.2425	0.1847	0.2739	0.249	0.3876	0.207	0.1023	0.052	0.0819	0.0465	0.0603	0.0851	0.1821	0.1176
TAG	TAG56:2FA20:0	uM	0.0163	0.0285	0.0106	0.0264	0.0254	0.1917	0.0304	0.1292	0.1013	0.1143	0.1489	0.2141	0.1128	0.0449	0.0151	0.0363	0.0088	0.02	0.0296	0.0896	0.0485
TAG	TAG56:2FA20:1	uM	0.0074	0.0154	0.0052	0.0129	0.0126	0.109	0.02	0.0857	0.0558	0.0782	0.0775	0.1214	0.067	0.0195	0.0079	0.0214	0.0056	0.0115	0.0141	0.0508	0.0245
TAG	TAG56:3FA16:0	uM	0.0101	0.0103	0.0043	0.0113	0.0105	0.0675	0.0206	0.0647	0.0575	0.1163	0.0921	0.1114	0.0791	0.0204	0.0057	0.0157	0.0045	0.0099	0.0114	0.0547	0.0214
TAG	TAG56:3FA18:0	uM	0.0095	0.016	0.0067	0.0133	0.014	0.1075	0.0215	0.0823	0.0622	0.0686	0.0868	0.1088	0.0682	0.0258	0.0099	0.0228	0.0055	0.0144	0.0172	0.0477	0.0268
TAG	TAG56:3FA18:1	uM	0.0554	0.1204	0.0347	0.1107	0.1053	0.9169	0.1355	0.6807	0.4657	0.7194	0.6681	1.0762	0.5036	0.1735	0.0529	0.1576	0.0372	0.0856	0.1078	0.4249	0.1938
TAG	TAG56:3FA18:2	uM	0.0225	0.0464	0.0155	0.0432	0.0378	0.2992	0.0599	0.2302	0.1881	0.2339	0.2514	0.3718	0.2103	0.0743	0.0212	0.0614	0.015	0.0349	0.0425	0.164	0.0755
TAG	TAG56:3FA20:0	uM	0.0191	0.0462	0.0158	0.0406	0.0401	0.3093	0.0511	0.2302	0.178	0.1645	0.2583	0.3435	0.1922	0.0703	0.0212	0.0647	0.0126	0.0359	0.0532	0.1565	0.0812
TAG	TAG56:3FA20:1	uM	0.0322	0.0728	0.0216	0.0673	0.0663	0.5923	0.0878	0.4393	0.2897	0.4273	0.4085	0.6794	0.326	0.1066	0.0322	0.1017	0.0242	0.0502	0.0673	0.2699	0.1216
TAG	TAG56:3FA20:2	uM	0.0033	0.0076	0.0023	0.0068	0.0057	0.0495	0.0085	0.0353	0.0284	0.0411	0.0407	0.056	0.0314	0.0105	0.0036	0.0088	0.0024	0.0057	0.0064	0.0204	0.0117
TAG	TAG56:4FA16:0	uM	0.0065	0.0083	0.0028	0.0085	0.0083	0.061	0.0137	0.054	0.0365	0.0665	0.0671	0.0787	0.071	0.0129	0.0035	0.012	0.0031	0.0073	0.0083	0.0364	0.0178
TAG	TAG56:4FA18:0	uM	0.017	0.0291	0.0127	0.0292	0.0284	0.1613	0.0297	0.1178	0.0734	0.0784	0.117	0.1603	0.1309	0.036	0.0165	0.0391	0.011	0.0239	0.0282	0.0754	0.0446
TAG	TAG56:4FA18:1	uM	0.0653	0.1831	0.0492	0.1589	0.1505	1.4753	0.2225	1.1456	0.8088	1.0326	1.1905	1.6244	0.9503	0.275	0.072	0.2757	0.0514	0.1318	0.1862	0.6664	0.3422
TAG	TAG56:4FA18:2	uM	0.0479	0.1394	0.0438	0.1174	0.1124	1.1446	0.1903	0.9069	0.6562	0.7232	0.899	1.3177	0.734	0.2427	0.057	0.2281	0.0383	0.1179	0.1636	0.5439	0.2627
TAG	TAG56:4FA20:1	uM	0.0512	0.1516	0.044	0.1314	0.1276	1.2708	0.1959	1.0387	0.7226	0.8092	1.0161	1.4227	0.8242	0.2547	0.062	0.2592	0.0421	0.1195	0.1712	0.6146	0.299
TAG	TAG56:4FA20:2	uM	0.018	0.0389	0.0111	0.0335	0.0336	0.3365	0.0432	0.247	0.2009	0.2494	0.2842	0.3498	0.1852	0.0548	0.0158	0.0547	0.0111	0.0282	0.0394	0.1288	0.0698
TAG	TAG56:4FA20:3	uM	0.0124	0.0191	0.0069	0.0212	0.0195	0.1161	0.0159	0.0907	0.0558	0.0682	0.0858	0.1141	0.0908	0.0237	0.0102	0.0288	0.0062	0.0161	0.0176	0.0617	0.0327
TAG	TAG56:4FA20:4	uM	0.0062	0.0097	0.004	0.0089	0.0106	0.0853	0.0174	0.0603	0.0274	0.0304	0.0461	0.0676	0.0686	0.0162	0.0066	0.0181	0.0033	0.0083	0.0102	0.0346	0.0172
TAG	TAG56:4FA22:4	uM	0.0026	0.0036	0.0011	0.0047	0.0041	0.0348	0.0058	0.0237	0.0109	0.0179	0.018	0.0322	0.0301	0.005	0.0017	0.0073	0.0012	0.0024	0.0042	0.0168	0.0077
TAG	TAG56:5FA16:0	uM	0.0234	0.04	0.0091	0.044	0.0392	0.3322	0.0556	0.2639	0.1052	0.1715	0.23	0.3284	0.3211	0.0489	0.0144	0.0901	0.009	0.0265	0.0356	0.1677	0.0779
TAG	TAG56:5FA18:0	uM	0.0241	0.0484	0.0179	0.051	0.0495	0.3529	0.0572	0.2589	0.1274	0.1392	0.2208	0.2887	0.2904	0.0645	0.0244	0.0901	0.0144	0.0382	0.0501	0.1655	0.0906
TAG	TAG56:5FA18:1	uM	0.0791	0.1789	0.0482	0.1803	0.1667	1.5145	0.2026	1.1489	0.8009	1.0595	1.2677	1.5574	1.1017	0.2538	0.0707	0.2966	0.0521	0.1382	0.1757	0.6692	0.3352
TAG	TAG56:5FA18:2	uM	0.0563	0.1838	0.0579	0.1742	0.1625	1.6346	0.2789	1.423	1.02	0.9815	1.47	1.8579	1.2262	0.3442	0.0791	0.374	0.0557	0.1875	0.2367	0.7693	0.4251
TAG	TAG56:5FA20:1	uM	0.0265	0.0905	0.0284	0.0826	0.0778	0.8244	0.1472	0.7641	0.5235	0.4613	0.7544	0.9557	0.6447	0.1795	0.0404	0.2069	0.0271	0.0973	0.1323	0.4158	0.2078
TAG	TAG56:5FA20:2	uM	0.0265	0.0696	0.021	0.06	0.0594	0.6567	0.0982	0.542	0.4585	0.479	0.6805	0.7354	0.4452	0.1112	0.0301	0.1232	0.0209	0.0684	0.0829	0.2664	0.1434
TAG	TAG56:5FA20:3	uM	0.0347	0.0792	0.0217	0.0733	0.0687	0.5579	0.0732	0.4077	0.2965	0.3858	0.4915	0.5479	0.3728	0.1023	0.0332	0.1097	0.0203	0.0609	0.0691	0.267	0.1245
TAG	TAG56:5FA20:4	uM	0.0457	0.0787	0.0289	0.0901	0.0848	0.6702	0.122	0.5252	0.2106	0.2866	0.3668	0.5479	0.598	0.1109	0.0419	0.1594	0.0274	0.0654	0.0841	0.2968	0.1397
TAG	TAG56:5FA22:4	uM	0.0268	0.0424	0.0111	0.0522	0.0503	0.368	0.0632	0.2819	0.1065	0.2022	0.2265	0.3521	0.3652	0.0581	0.0163	0.0943	0.0115	0.032	0.0389	0.1845	0.0863
TAG	TAG56:5FA22:5	uM	0.0168	0.0283	0.008	0.0317	0.0302	0.2313	0.0517	0.2259	0.0872	0.0871	0.1822	0.2349	0.2776	0.0424	0.0117	0.0766	0.007	0.0247	0.0353	0.1337	0.0651
TAG	TAG56:6FA16:0	uM	0.0957	0.1717	0.0499	0.2011	0.1932	1.4614	0.2943	1.3918	0.5127	0.5985	1.1646	1.4731	1.8413	0.2771	0.0689	0.5415	0.0431	0.146	0.2161	0.9341	0.4255
TAG	TAG56:6FA18:0	uM	0.0271	0.042	0.0186	0.0469	0.0456	0.3855	0.085	0.3186	0.147	0.1188	0.2841	0.3259	0.372	0.0698	0.0228	0.1076	0.0146	0.0402	0.0547	0.1799	0.0869
TAG	TAG56:6FA18:1	uM	0.1251	0.2586	0.0692	0.2669	0.2462	2.1966	0.3343	1.8753	1.0896	1.1813	1.9008	2.2295	2.069	0.3917	0.0998	0.5936	0.0678	0.2016	0.2773	1.2148	0.5469
TAG	TAG56:6FA18:2	uM	0.0721	0.1928	0.0583	0.199	0.1868	1.8332	0.2726	1.4951	1.0577	0.9587	1.591	1.8504	1.5229	0.3287	0.0839	0.4257	0.0545	0.2003	0.2575	0.8771	0.4562
TAG	TAG56:6FA18:3	uM	0.0083	0.0187	0.006	0.0176	0.0184	0.163	0.0199	0.1472	0.1121	0.0973	0.1797	0.1834	0.1492	0.0293	0.0085	0.0432	0.0053	0.0169	0.0203	0.0911	0.0407
TAG	TAG56:6FA20:2	uM	0.0133	0.0434	0.0143	0.0437	0.0397	0.4464	0.0648	0.3894	0.3231	0.2646	0.4748	0.4848	0.3517	0.085	0.0188	0.0946	0.0133	0.0471	0.0647	0.1995	0.1171
TAG	TAG56:6FA20:3	uM	0.0436	0.1285	0.0341	0.1226	0.1174	1.0401	0.1268	0.8199	0.6528	0.6688	0.9732	1.0825	0.7737	0.192	0.0485	0.205	0.0324	0.1096	0.1347	0.499	0.2392
TAG	TAG56:6FA20:4	uM	0.0914	0.1676	0.0624	0.1847	0.1697	1.5439	0.2779	1.1178	0.6353	0.7991	0.9768	1.3633	1.3045	0.2763	0.0824	0.3583	0.0554	0.137	0.1922	0.6713	0.3167
TAG	TAG56:6FA20:5	uM	0.0119	0.0164	0.0056	0.0151	0.0154	0.1425	0.0288	0.1346	0.0521	0.0428	0.0948	0.1334	0.1328	0.0238	0.0077	0.0429	0.0047	0.0098	0.0154	0.0621	0.0304
TAG	TAG56:6FA22:4	uM	0.033	0.0683	0.019	0.0916	0.0835	0.6515	0.1157	0.5474	0.2249	0.3497	0.4568	0.6385	0.7571	0.1071	0.0276	0.1971	0.0204	0.0611	0.0789	0.3451	0.1721
TAG	TAG56:6FA22:5	uM	0.1818	0.2879	0.0789	0.3466	0.3276	2.3839	0.4769	2.2505	0.8274	0.9158	1.7368	2.3027	2.8763	0.456	0.1137	0.8811	0.0759	0.234	0.3568	1.497	0.7006
TAG	TAG56:6FA22:6	uM	0.1261	0.1809	0.0635	0.213	0.2034	1.5869	0.3993	1.3929	0.7375	0.657	1.5312	1.5285	1.8935	0.353	0.0812	0.5399	0.0603	0.1702	0.2623	0.9158	0.4362
TAG	TAG56:7FA16:0	uM	0.2813	0.4882	0.1638	0.6	0.5882	3.8725	0.8965	3.8093	1.7004	1.6822	3.3652	3.9062	5.2435	0.8541	0.2099	1.6279	0.148	0.4648	0.7159	2.6493	1.3307
TAG	TAG56:7FA16:1	uM	0.0129	0.0209	0.0041	0.0207	0.0211	0.1957	0.0314	0.2117	0.125	0.1633	0.2126	0.2228	0.218	0.0325	0.0077	0.0549	0.006	0.014	0.022	0.1113	0.0422
TAG	TAG56:7FA18:0	uM	0.0078	0.0119	0.0058	0.0135	0.0133	0.0931	0.0192	0.0934	0.0467	0.036	0.0862	0.0886	0.1098	0.0191	0.0069	0.032	0.0044	0.0086	0.0136	0.051	0.0226
TAG	TAG56:7FA18:1	uM	0.2194	0.3592	0.108	0.4111	0.3795	3.077	0.6465	2.7736	1.5604	1.5409	2.8107	2.9717	3.5175	0.6203	0.1552	0.9809	0.103	0.3169	0.4714	1.8613	0.8294
TAG	TAG56:7FA18:2	uM	0.1221	0.3174	0.0958	0.3625	0.3546	2.8874	0.5146	2.8875	1.5609	1.2918	2.6999	2.7705	3.4635	0.576	0.1341	0.9981	0.0812	0.322	0.4715	1.7754	0.8859
TAG	TAG56:7FA18:3	uM	0.0113	0.0221	0.0078	0.0228	0.0214	0.1914	0.0209	0.1667	0.1095	0.102	0.2056	0.1829	0.1945	0.0327	0.0094	0.05	0.007	0.0181	0.028	0.0937	0.0482
TAG	TAG56:7FA20:3	uM	0.0254	0.0761	0.0223	0.0761	0.0792	0.7046	0.0888	0.5833	0.4555	0.3792	0.7184	0.6503	0.5962	0.1357	0.0293	0.1529	0.0199	0.0851	0.1003	0.3482	0.1907
TAG	TAG56:7FA20:4	uM	0.0954	0.2061	0.0637	0.2149	0.2181	2.3562	0.3682	1.7207	1.2108	1.2308	1.7639	2.0461	2.1028	0.3822	0.0888	0.4989	0.0606	0.1696	0.2497	0.9572	0.477
TAG	TAG56:7FA20:5	uM	0.0578	0.0863	0.0313	0.0954	0.096	0.8857	0.1649	0.8416	0.3422	0.2897	0.6254	0.8552	0.9034	0.1397	0.0422	0.2621	0.0224	0.0546	0.0978	0.4242	0.1785
TAG	TAG56:7FA22:4	uM	0.0063	0.0144	0.0039	0.0169	0.0153	0.1414	0.023	0.1346	0.0774	0.1067	0.1294	0.15	0.1631	0.0211	0.005	0.0389	0.0035	0.011	0.0147	0.073	0.0333
TAG	TAG56:7FA22:5	uM	0.2094	0.4644	0.1505	0.5958	0.5793	3.8926	0.8816	4.1844	1.6124	1.5203	3.2847	3.9576	5.3783	0.8019	0.1917	1.7914	0.1243	0.4347	0.7101	2.7973	1.4176
TAG	TAG56:7FA22:6	uM	1.3405	2.1196	0.6821	2.5272	2.4172	14.4255	3.7946	13.547	7.2151	7.2697	13.3031	14.6524	18.1138	3.5629	0.8897	5.9473	0.6698	1.8985	2.9788	10.2495	5.1127
TAG	TAG56:8FA16:0	uM	0.2521	0.5273	0.2112	0.7351	0.6933	3.655	1.0916	3.917	2.0575	1.7231	3.8025	3.9109	5.5649	1.0145	0.2408	2.013	0.1668	0.5519	0.9042	3.0183	1.6279
TAG	TAG56:8FA16:1	uM	0.0319	0.0525	0.0135	0.0586	0.0584	0.4493	0.0895	0.5002	0.3494	0.4002	0.5802	0.5133	0.574	0.0903	0.0185	0.1505	0.0127	0.04	0.0598	0.3174	0.1268
TAG	TAG56:8FA18:1	uM	0.0424	0.0769	0.0232	0.0897	0.083	0.7688	0.1434	0.7802	0.4688	0.4033	0.7446	0.8137	0.9079	0.136	0.0332	0.2439	0.0201	0.0573	0.0921	0.4482	0.1861
TAG	TAG56:8FA18:2	uM	0.2408	0.5097	0.1996	0.6537	0.6307	4.2076	1.0589	4.2184	2.3951	1.9284	4.1262	4.3269	5.9479	1.0668	0.2317	1.9082	0.1605	0.5542	0.8677	2.9893	1.5745
TAG	TAG56:8FA18:3	uM	0.0141	0.0291	0.0099	0.0311	0.0319	0.2341	0.0306	0.2209	0.1422	0.108	0.2576	0.2285	0.3073	0.0399	0.011	0.0802	0.0089	0.0232	0.0365	0.1429	0.0699
TAG	TAG56:8FA20:4	uM	0.0528	0.1184	0.0429	0.1308	0.1256	1.4846	0.253	1.196	0.8398	0.6538	1.1514	1.2735	1.4345	0.2727	0.0553	0.3582	0.0372	0.1183	0.1841	0.6326	0.346
TAG	TAG56:8FA20:5	uM	0.0785	0.1408	0.0546	0.1722	0.1761	1.8301	0.318	1.901	0.7813	0.5617	1.4124	1.7963	2.1087	0.2849	0.0744	0.595	0.0385	0.1158	0.2078	0.912	0.4086
TAG	TAG56:8FA22:5	uM	0.0439	0.0818	0.0252	0.1079	0.1036	0.7676	0.1529	0.8805	0.4916	0.4653	0.8525	0.8526	1.086	0.1608	0.0329	0.3152	0.0246	0.0775	0.1251	0.5209	0.2524
TAG	TAG56:8FA22:6	uM	1.6337	3.2231	1.287	4.2251	4.1862	21.7303	6.4195	23.4131	12.6325	11.6841	21.7164	23.7247	33.2187	6.1997	1.4912	11.7818	1.0397	3.5604	5.6663	17.7486	10.0611
TAG	TAG56:9FA18:3	uM	0.0163	0.0287	0.0098	0.0349	0.0352	0.2603	0.0366	0.2905	0.1694	0.1223	0.3241	0.2775	0.3935	0.0492	0.0124	0.1026	0.0078	0.0275	0.0422	0.176	0.0793
TAG	TAG56:9FA20:4	uM	0.0121	0.0199	0.0069	0.0256	0.0225	0.2129	0.0295	0.2095	0.1446	0.12	0.2405	0.2071	0.2936	0.0294	0.0098	0.0665	0.0061	0.0169	0.0234	0.1071	0.0497
TAG	TAG56:9FA20:5	uM	0.0413	0.0807	0.0362	0.1067	0.1063	1.173	0.2121	1.3241	0.5549	0.306	1.0087	1.1468	1.5656	0.1921	0.0467	0.4572	0.0224	0.0848	0.1569	0.6381	0.3081
TAG	TAG56:9FA22:6	uM	0.1919	0.3782	0.1235	0.458	0.4575	3.3691	0.6535	3.7436	3.0344	2.5886	4.6532	3.7179	4.9329	0.7143	0.1416	1.3904	0.1052	0.3541	0.536	2.39	1.045
TAG	TAG57:2FA18:1	uM	0.0703	0.218	0.0721	0.217	0.2108	1.9113	0.4719	1.8805	1.6188	1.0707	1.9437	1.9609	1.9898	0.5326	0.082	0.666	0.0782	0.2574	0.4266	1.1839	0.6531
TAG	TAG57:3FA18:2	uM	0.0577	0.1983	0.0761	0.2125	0.2074	2.1223	0.5452	2.3727	1.9389	0.9787	2.2094	2.085	2.5005	0.6258	0.0876	0.8794	0.0781	0.3263	0.5678	1.3731	0.8427
TAG	TAG57:8FA22:6	uM	0.0261	0.0428	0.0237	0.0471	0.0483	0.2394	0.0872	0.2228	0.2091	0.1623	0.2935	0.2514	0.2851	0.0753	0.0239	0.1141	0.0204	0.044	0.0651	0.1577	0.1072
TAG	TAG57:9FA22:6	uM	0.1659	0.2302	0.1814	0.2284	0.2284	0.3412	0.1894	0.3613	0.3352	0.3414	0.4104	0.364	0.4076	0.2413	0.1996	0.2419	0.1886	0.1986	0.2863	0.3219	0.3332
TAG	TAG58:10FA18:2	uM	0.0536	0.1922	0.0689	0.2045	0.1982	2.0024	0.5297	2.323	1.829	0.9139	2.0341	2.0124	2.3745	0.6458	0.0833	0.8314	0.073	0.3195	0.5478	1.2499	0.8091
TAG	TAG58:10FA20:4	uM	0.0159	0.0216	0.0109	0.027	0.023	0.1772	0.0721	0.1668	0.1192	0.1211	0.1699	0.1845	0.2473	0.0443	0.0128	0.0665	0.0092	0.0183	0.0282	0.0824	0.0463
TAG	TAG58:10FA20:5	uM	0.0077	0.0104	0.0036	0.0111	0.013	0.0802	0.0224	0.0938	0.0441	0.0366	0.0813	0.0847	0.1226	0.0158	0.0051	0.0352	0.0035	0.008	0.0107	0.0465	0.0215
TAG	TAG58:10FA22:5	uM	0.0074	0.0206	0.0071	0.0247	0.0252	0.2221	0.0403	0.2723	0.1772	0.1012	0.2526	0.2287	0.3354	0.0491	0.0087	0.0948	0.0068	0.0239	0.0417	0.143	0.082
TAG	TAG58:10FA22:6	uM	0.1933	0.6725	0.2343	0.7042	0.6369	6.5565	1.5863	6.9664	5.676	3.0784	6.9274	6.225	7.661	1.9049	0.255	2.6206	0.2386	0.9258	1.695	4.1252	2.4805
TAG	TAG58:2FA18:1	uM	0.0041	0.005	0.0018	0.0041	0.0035	0.0217	0.0067	0.0153	0.0146	0.0294	0.0133	0.0328	0.0159	0.0077	0.0025	0.0048	0.0019	0.003	0.0041	0.0168	0.0074
TAG	TAG58:3FA18:1	uM	0.0085	0.0114	0.0034	0.0109	0.0105	0.0596	0.0151	0.0539	0.0443	0.1133	0.0499	0.1044	0.0428	0.0203	0.0055	0.0128	0.004	0.0087	0.0088	0.0495	0.0199
TAG	TAG58:5FA18:1	uM	0.0065	0.0108	0.0031	0.0109	0.0111	0.1035	0.0163	0.0826	0.0624	0.1146	0.094	0.1249	0.0751	0.019	0.0047	0.0157	0.0039	0.0076	0.0105	0.0509	0.0232
TAG	TAG58:6FA16:0	uM	0.0057	0.0094	0.0026	0.0083	0.0082	0.1362	0.0222	0.1291	0.0769	0.1192	0.1702	0.1675	0.1386	0.0175	0.0042	0.0201	0.0035	0.0079	0.0118	0.0674	0.0239
TAG	TAG58:6FA18:0	uM	0.0065	0.0114	0.0045	0.01	0.0099	0.0853	0.022	0.0797	0.0448	0.0373	0.0596	0.0781	0.0713	0.0212	0.0054	0.0206	0.0044	0.0092	0.0132	0.0391	0.0205
TAG	TAG58:6FA18:1	uM	0.0119	0.0287	0.0072	0.025	0.0249	0.3344	0.0497	0.2706	0.1605	0.2294	0.2565	0.3277	0.2477	0.048	0.0104	0.0545	0.0095	0.0202	0.0306	0.1289	0.0612
TAG	TAG58:6FA20:4	uM	0.005	0.0077	0.0032	0.007	0.0058	0.0454	0.0101	0.0348	0.0313	0.051	0.0343	0.0564	0.0352	0.0117	0.0032	0.0089	0.0022	0.0046	0.0067	0.0241	0.0124
TAG	TAG58:6FA22:4	uM	0.0069	0.0177	0.0035	0.0156	0.0135	0.188	0.0284	0.136	0.08	0.1141	0.0974	0.159	0.1205	0.0272	0.006	0.0291	0.0053	0.0119	0.0178	0.0635	0.0341
TAG	TAG58:6FA22:5	uM	0.0077	0.0153	0.0049	0.0163	0.0146	0.1516	0.0335	0.1411	0.0845	0.0711	0.1098	0.147	0.1293	0.0344	0.006	0.0415	0.0058	0.0157	0.0216	0.07	0.038
TAG	TAG58:7FA16:0	uM	0.0156	0.0251	0.007	0.0234	0.0222	0.2427	0.0464	0.2504	0.1542	0.2044	0.3649	0.3152	0.3041	0.0392	0.0108	0.0536	0.0081	0.0202	0.0259	0.1398	0.0587
TAG	TAG58:7FA18:0	uM	0.0112	0.0234	0.0092	0.0246	0.0222	0.2006	0.0499	0.1885	0.1147	0.0746	0.1512	0.1808	0.1802	0.053	0.013	0.0634	0.0095	0.0246	0.0385	0.0941	0.055
TAG	TAG58:7FA18:1	uM	0.038	0.0939	0.0231	0.0889	0.0856	0.9857	0.1777	0.9199	0.5516	0.5416	0.7056	0.9547	0.8225	0.2111	0.034	0.2207	0.0309	0.0824	0.1282	0.4606	0.238
TAG	TAG58:7FA18:2	uM	0.0145	0.0356	0.0112	0.0385	0.0367	0.4564	0.0813	0.4596	0.2745	0.3166	0.4527	0.4903	0.4444	0.0892	0.016	0.0992	0.0137	0.04	0.0604	0.2125	0.1106
TAG	TAG58:7FA20:4	uM	0.0109	0.0119	0.0052	0.0122	0.0127	0.0804	0.0205	0.0629	0.0487	0.0765	0.0618	0.088	0.0691	0.021	0.0072	0.0189	0.0063	0.0084	0.0119	0.0339	0.0195
TAG	TAG58:7FA22:4	uM	0.0083	0.0291	0.0077	0.0292	0.0289	0.3858	0.0648	0.3338	0.1906	0.2305	0.2455	0.3533	0.2869	0.0652	0.0092	0.0723	0.0101	0.0288	0.0382	0.1399	0.0824
TAG	TAG58:7FA22:5	uM	0.0362	0.0928	0.0263	0.088	0.0867	0.8987	0.1832	0.8818	0.5192	0.4543	0.6626	0.8429	0.7799	0.2123	0.0341	0.2253	0.0306	0.0855	0.1337	0.4533	0.2399
TAG	TAG58:7FA22:6	uM	0.0545	0.1214	0.0413	0.1099	0.1096	0.9351	0.2608	0.8479	0.6295	0.5076	0.8473	0.9425	0.8679	0.2719	0.052	0.265	0.0431	0.1152	0.1759	0.4747	0.261
TAG	TAG58:8FA18:1	uM	0.0776	0.208	0.0555	0.1978	0.1966	2.0938	0.4355	1.9812	1.3911	1.1341	1.754	1.9364	1.79	0.5006	0.0778	0.5662	0.0698	0.1994	0.3555	1.1232	0.5912
TAG	TAG58:8FA18:2	uM	0.0389	0.1201	0.0352	0.1207	0.1137	1.2329	0.2524	1.2454	0.7947	0.5854	0.9858	1.1482	1.1861	0.2741	0.0455	0.3433	0.0395	0.1368	0.2044	0.6127	0.3776
TAG	TAG58:8FA20:3	uM	0.0047	0.0068	0.0022	0.006	0.0067	0.0434	0.0088	0.0422	0.0332	0.039	0.0466	0.047	0.0462	0.0102	0.0025	0.0113	0.0027	0.006	0.0075	0.0246	0.0141
TAG	TAG58:8FA20:4	uM	0.0211	0.0231	0.0119	0.0218	0.0225	0.1046	0.0423	0.081	0.0648	0.0909	0.0825	0.1142	0.1118	0.0278	0.0148	0.0334	0.0152	0.0153	0.0227	0.0479	0.0306
TAG	TAG58:8FA22:5	uM	0.0473	0.1601	0.045	0.1633	0.1529	1.7682	0.3551	1.8477	1.1495	0.8436	1.4191	1.6595	1.7109	0.4102	0.0575	0.5127	0.053	0.1702	0.2726	0.9416	0.5181
TAG	TAG58:8FA22:6	uM	0.2846	0.6569	0.2153	0.6358	0.6051	5.0814	1.2418	4.4076	3.4957	2.9271	4.4526	4.8296	4.5371	1.42	0.2662	1.5764	0.2434	0.6432	1.0113	2.9393	1.559
TAG	TAG58:9FA18:1	uM	0.065	0.207	0.0662	0.1919	0.1916	1.7828	0.4393	1.6922	1.472	0.9438	1.7636	1.7827	1.8045	0.4979	0.0786	0.6153	0.0696	0.231	0.3872	1.1034	0.5761
TAG	TAG58:9FA18:2	uM	0.065	0.2223	0.0689	0.2267	0.2233	2.3224	0.5581	2.477	1.9184	1.1157	2.1368	2.2734	2.4396	0.6374	0.0864	0.8217	0.0823	0.2808	0.4927	1.3784	0.7745
TAG	TAG58:9FA20:4	uM	0.0123	0.0151	0.0066	0.0199	0.0173	0.1204	0.0323	0.0979	0.0671	0.0845	0.0974	0.1107	0.1349	0.0269	0.008	0.0352	0.0057	0.0117	0.0163	0.0531	0.0313
TAG	TAG58:9FA22:5	uM	0.0263	0.0926	0.0276	0.1003	0.0917	1.1586	0.2389	1.315	0.8396	0.4679	1.0363	1.0676	1.2742	0.2964	0.0365	0.3891	0.0327	0.1254	0.2246	0.6545	0.3841
TAG	TAG58:9FA22:6	uM	0.369	1.0936	0.3459	1.1189	1.0339	9.8719	2.3669	9.3701	8.0136	5.1721	9.6229	9.577	10.1081	2.9695	0.4363	3.3946	0.3928	1.2573	2.2451	6.0538	3.2707
TAG	TAG60:10FA22:5	uM	0.0048	0.0124	0.004	0.0142	0.0132	0.0928	0.0259	0.1199	0.0684	0.0629	0.0874	0.0953	0.1264	0.0284	0.0048	0.0379	0.0044	0.0111	0.0178	0.0589	0.0341
TAG	TAG60:10FA22:6	uM	0.0259	0.056	0.0216	0.0624	0.0568	0.3441	0.1188	0.3472	0.323	0.3075	0.349	0.3896	0.3971	0.1222	0.026	0.1324	0.0234	0.0603	0.0844	0.2153	0.1385
TAG	TAG60:11FA22:5	uM	0.0092	0.02	0.0059	0.0225	0.0214	0.1555	0.0535	0.2037	0.1136	0.0855	0.1618	0.163	0.2393	0.0503	0.0077	0.0763	0.007	0.0203	0.0331	0.0996	0.0572
TAG	TAG60:11FA22:6	uM	0.0323	0.0781	0.0252	0.0885	0.0896	0.5912	0.1977	0.6761	0.5067	0.3964	0.6374	0.5982	0.8022	0.1872	0.032	0.2603	0.0273	0.0863	0.13	0.3749	0.2244
TAG	TAG60:12FA22:6	uM	0.058	0.1332	0.0451	0.1448	0.1384	1.0998	0.4454	1.3107	1.0565	0.6825	1.2997	1.0849	1.7077	0.3751	0.052	0.5347	0.0484	0.156	0.2513	0.6992	0.4033

## Sheet: Species Compositions
TrueMass® Complex Lipid Panel: Molecular Species Compositions
Project Code:	WAKE-0204-18VWCLP
		Sample Name	WAKE-01208-01	WAKE-01209-01	WAKE-01210-01	WAKE-01211-01	WAKE-01212-01	WAKE-01213-01	WAKE-01214-01	WAKE-01215-01	WAKE-01216-01	WAKE-01217-01	WAKE-01218-01	WAKE-01219-01	WAKE-01220-01	WAKE-01221-01	WAKE-01222-01	WAKE-01223-01	WAKE-01224-01	WAKE-01225-01	WAKE-01226-01	WAKE-01227-01	WAKE-01228-01
		CLIENT IDENTIFIER	Sham4	Sham5	Sham6	Sham7	Sham8	CLP1	CLP2	CLP3	CLP4	CLP5	CLP6	CLP7	CLP8	DCA1	DCA2	DCA3	DCA4	DCA5	DCA6	DCA7	DCA8
		AGE	8wk	8wk	8wk	8wk	8wk	8wk	8wk	8wk	8wk	8wk	8wk	8wk	8wk	8wk	8wk	8wk	8wk	8wk	8wk	8wk	8wk
		AMOUNT EXTRACTED CLP	75	75	75	75	75	75	75	75	75	75	75	75	75	75	75	75	75	75	75	75	75
		BRADFORD CLP	13.238	9.19	11.778	9.73	9.801	8.604	12.735	9.121	8.822	9.049	8.744	8.788	9.677	9.331	10.476	11.423	11.957	10.915	8.045	8.718	7.411
		CELL LINE	Primary cells	Primary cells	Primary cells	Primary cells	Primary cells	Primary cells	Primary cells	Primary cells	Primary cells	Primary cells	Primary cells	Primary cells	Primary cells	Primary cells	Primary cells	Primary cells	Primary cells	Primary cells	Primary cells	Primary cells	Primary cells
		GENDER	M	M	M	M	M	M	M	M	M	M	M	M	M	M	M	M	M	M	M	M	M
		ORIG ORDER	4	5	6	7	8	9	10	11	12	13	14	15	16	17	18	19	20	21	22	23	24
		SPL AMNT	150-200 ul cell pellet	150-200 ul cell pellet	150-200 ul cell pellet	150-200 ul cell pellet	150-200 ul cell pellet	150-200 ul cell pellet	150-200 ul cell pellet	150-200 ul cell pellet	150-200 ul cell pellet	150-200 ul cell pellet	150-200 ul cell pellet	150-200 ul cell pellet	150-200 ul cell pellet	150-200 ul cell pellet	150-200 ul cell pellet	150-200 ul cell pellet	150-200 ul cell pellet	150-200 ul cell pellet	150-200 ul cell pellet	150-200 ul cell pellet	150-200 ul cell pellet
		SPL TYPE	cells	cells	cells	cells	cells	cells	cells	cells	cells	cells	cells	cells	cells	cells	cells	cells	cells	cells	cells	cells	cells
		SUBJ ID	C57/BL6 mouse	C57/BL6 mouse	C57/BL6 mouse	C57/BL6 mouse	C57/BL6 mouse	C57/BL6 mouse	C57/BL6 mouse	C57/BL6 mouse	C57/BL6 mouse	C57/BL6 mouse	C57/BL6 mouse	C57/BL6 mouse	C57/BL6 mouse	C57/BL6 mouse	C57/BL6 mouse	C57/BL6 mouse	C57/BL6 mouse	C57/BL6 mouse	C57/BL6 mouse	C57/BL6 mouse	C57/BL6 mouse
		TIME POINT	30 hr	30 hr	30 hr	30 hr	30 hr	30 hr	30 hr	30 hr	30 hr	30 hr	30 hr	30 hr	30 hr	30 hr	30 hr	30 hr	30 hr	30 hr	30 hr	30 hr	30 hr
		TREATMENT	None	None	None	None	None	CLP/PBS	CLP/PBS	CLP/PBS	CLP/PBS	CLP/PBS	CLP/PBS	CLP/PBS	CLP/PBS	CLP/DCA	CLP/DCA	CLP/DCA	CLP/DCA	CLP/DCA	CLP/DCA	CLP/DCA	CLP/DCA
		TX	Sham	Sham	Sham	Sham	Sham	CLP/PBS	CLP/PBS	CLP/PBS	CLP/PBS	CLP/PBS	CLP/PBS	CLP/PBS	CLP/PBS	CLP/DCA	CLP/DCA	CLP/DCA	CLP/DCA	CLP/DCA	CLP/DCA	CLP/DCA	CLP/DCA
		GROUP NAME	11.8.18 30hr sham mouse hepatocytes	11.8.18 30hr sham mouse hepatocytes	9.13.18 30hr sham mouse hepatocytes	10.9.18 30hr sham mouse hepayocytes	10.9.18 30hr sham mouse hepayocytes	11.8.18 30hr CLP mouse hepatocytes	9.20.18 30hr CLP mouse hepatocytes	10.11.18 30hr CLP mouse hepatocytes	9.25.18 30hr CLP mouse hepatocytes	10.11.18 30hr CLP mouse hepatocytes	9.27.18 30hr CLP mouse hepatocytes	10.4.18 30hr CLP mouse hepatocytes	10.9.18 30hr CLP mouse hepatocytes	9.18.18 30hr CLP+DCA mouse hepatocytes	9.18.18 30hr CLP+DCA mouse hepatocytes	9.20.18 30hr CLP+DCA mouse hepatocytes	9.25.18 30hr CLP+DCA mouse hepatocytes	9.27.18 30hr CLP+DCA mouse hepatocytes	9.27.18 30hr CLP+DCA mouse hepatocytes	10.4.18 30hr CLP+DCA mouse hepatocytes	10.4.18 30hr CLP+DCA mouse hepatocytes
Class	Name	Group Units	1	1	1	1	1	2	2	2	2	2	2	2	2	3	3	3	3	3	3	3	3
CE	CE(12:0)	Mol%		0.0157		0.014					0.0819					0.0118	0.0244				0.0098	0.0096
CE	CE(14:0)	Mol%	0.264	0.1875	0.1457	0.1948	0.1873	0.2155	0.2665	0.2721	0.5391	0.4482	0.4026	0.2047	0.2525	0.1883	0.2123	0.2023	0.2144	0.1683	0.1569	0.1866	0.1659
CE	CE(14:1)	Mol%	0.0436	0.0208	0.0289	0.0271	0.0246	0.0373	0.0605	0.0503	0.1459	0.0985	0.0804	0.0334	0.0397	0.0421	0.0349	0.0338	0.0273	0.025	0.0217	0.0289	0.0239
CE	CE(15:0)	Mol%	0.1923	0.1193	0.1025	0.1172	0.1116	0.0918	0.2053	0.1053	0.3879	0.2548	0.3001	0.0931	0.1092	0.107	0.1344	0.0926	0.1396	0.1056	0.0929	0.0762	0.0871
CE	CE(16:0)	Mol%	8.5624	9.0356	8.1414	8.9173	8.9226	10.3743	8.577	11.5556	8.8056	8.8332	10.2997	11.5137	11.0772	8.9719	8.7284	10.6546	8.6126	9.0115	9.3816	9.3198	9.7394
CE	CE(16:1)	Mol%	7.1197	7.2553	4.9015	6.9609	6.91	7.189	3.6675	9.0284	3.8697	9.5101	6.0884	8.9673	8.663	5.2152	5.5396	7.171	5.856	5.322	5.1535	9.0607	6.21
CE	CE(17:0)	Mol%	0.6142	0.5686	0.6281	0.5476	0.5415	0.4933	0.5016	0.4587	0.5167	0.516	0.571	0.4969	0.4475	0.4549	0.6314	0.5483	0.6068	0.443	0.4934	0.4284	0.4589
CE	CE(18:0)	Mol%	2.8216	2.7854	2.8711	2.4775	2.5747	2.6194	2.4495	2.1894	1.933	1.951	2.1685	2.5136	2.2316	2.6688	2.9417	2.3993	2.9362	2.5616	2.6584	2.1331	2.319
CE	CE(18:1)	Mol%	38.0864	42.0836	40.6814	40.017	39.4937	39.8434	28.2362	34.2501	17.5955	33.5846	27.5032	38.1761	38.0845	41.4929	42.1935	37.5925	42.8484	41.6288	40.5117	40.0502	39.4008
CE	CE(18:2)	Mol%	30.2637	30.1137	34.3021	31.685	32.3871	29.7493	37.7456	31.125	36.4234	29.525	33.1606	29.3499	30.7355	32.7474	31.6504	32.7155	30.7741	32.2774	34.4286	30.3265	34.1209
CE	CE(18:3)	Mol%	2.1081	1.9401	1.8837	1.933	1.9451	1.8327	1.2223	2.3509	1.8719	1.6645	1.8934	2.1609	2.4282	1.4216	1.7413	2.1229	1.4911	1.7943	1.9177	2.0048	2.083
CE	CE(18:4)	Mol%	0.0924	0.0532	0.0739	0.0518	0.0501	0.0175	0.0381	0.0391	0.0782	0.0364	0.0683	0.0267	0.0274	0.0271	0.0575	0.0391	0.0542	0.0409	0.0327	0.03	0.0316
CE	CE(20:0)	Mol%	0.2558	0.1627	0.2952	0.1614	0.1657	0.124	0.24	0.1167	0.4899	0.2755	0.2793	0.1309	0.0964	0.2288	0.2434	0.1649	0.2571	0.1988	0.2544	0.1195	0.1795
CE	CE(20:1)	Mol%	0.4217	0.2678	0.4058	0.316	0.3296	0.2001	0.5363	0.2841	1.2129	0.6238	0.6693	0.1871	0.2004	0.2455	0.4082	0.243	0.3847	0.3056	0.2479	0.2316	0.2349
CE	CE(20:2)	Mol%	0.1784	0.137	0.2082	0.1604	0.1601	0.1468	0.2625	0.1252	0.7751	0.3296	0.5297	0.1051	0.0823	0.1109	0.1635	0.1013	0.197	0.1917	0.1338	0.0978	0.1248
CE	CE(20:3)	Mol%	0.4276	0.2338	0.264	0.2952	0.2868	0.3076	0.5385	0.2583	1.3105	0.7401	1.007	0.2621	0.1892	0.2064	0.2612	0.1814	0.2447	0.2307	0.1728	0.2053	0.1837
CE	CE(20:4)	Mol%	3.2024	1.6994	1.5921	2.1583	2.1246	2.1579	4.7137	2.0072	7.4929	3.9768	4.7812	1.7688	1.571	1.4628	1.5393	1.4386	1.7073	1.545	1.1915	1.4326	1.2898
CE	CE(20:5)	Mol%	0.8091	0.3126	0.4113	0.359	0.3655	0.2866	0.8775	0.4357	1.1444	0.4746	0.8017	0.2691	0.3184	0.2929	0.3784	0.3403	0.3593	0.2889	0.2725	0.2625	0.2667
CE	CE(22:0)	Mol%	0.0789	0.0392	0.0665	0.0333	0.0421	0.0287	0.0821	0.0488	0.1653	0.1119	0.1286	0.0262	0.032	0.049	0.0456	0.0383	0.0658	0.0467	0.0382	0.0404	0.0253
CE	CE(22:1)	Mol%	0.172	0.0948	0.1426	0.0926	0.1074	0.0546	0.1807	0.0847	0.4922	0.2358	0.28	0.066	0.0632	0.0857	0.1237	0.0589	0.1239	0.1171	0.0739	0.0603	0.065
CE	CE(22:2)	Mol%	0.1442	0.092	0.149	0.1209	0.1019	0.0458	0.2434	0.0811	0.6456	0.2632	0.2705	0.0561	0.0444	0.0557	0.1083	0.0683	0.1117	0.1046	0.0801	0.0497	0.068
CE	CE(22:4)	Mol%	0.0269	0.0183	0.0203	0.0264	0.0229	0.098	0.1248	0.0787	0.653	0.2167	0.3237	0.0465	0.0193	0.0222	0.0242	0.0166	0.0179	0.0207	0.0184	0.0205	0.0161
CE	CE(22:5)	Mol%	0.2391	0.1458	0.159	0.1945	0.1776	0.2786	0.5501	0.3374	1.3246	0.4318	0.6101	0.2288	0.2187	0.2142	0.1888	0.2253	0.16	0.1932	0.1634	0.2108	0.168
CE	CE(22:6)	Mol%	3.7687	2.558	2.4364	3.0691	2.8935	3.6994	8.4863	4.5935	11.6671	5.6806	7.424	3.2383	2.9983	3.6049	2.5254	3.5002	2.722	3.3205	2.4376	3.5598	2.6902
CE	CE(24:0)	Mol%	0.0481	0.0274	0.0496	0.0333	0.0333	0.0292	0.0882	0.0472	0.1608	0.0875	0.1324	0.0416	0.0335	0.0349	0.0412	0.0257	0.0356	0.0291	0.0279	0.0304	0.0227
CE	CE(24:1)	Mol%	0.0584	0.0324	0.0398	0.0368	0.0407	0.0791	0.1057	0.076	0.2167	0.1299	0.2261	0.0368	0.0366	0.037	0.059	0.0252	0.0523	0.029	0.0288	0.0241	0.025
CER	CER(14:0)	Mol%	0.1248	0.2109	0.1597	0.2093	0.2297	0.1976	0.1242	0.2901	0.2501	0.3189	0.3144	0.1719	0.2573	0.1482	0.1433	0.2694	0.1826	0.1771	0.2475	0.2127	0.246
CER	CER(16:0)	Mol%	4.407	5.3134	5.0146	5.2817	5.3853	7.5631	6.8884	9.2526	7.5677	7.0737	8.944	7.2414	12.5158	6.4058	4.7142	9.6034	6.6859	6.588	6.7904	7.3189	6.7792
CER	CER(18:0)	Mol%	0.3549	0.8581	0.5484	0.7936	0.7566	1.849	1.0769	2.5948	1.5837	0.6632	2.7824	1.1893	1.8218	0.9122	0.5451	1.3476	0.5976	0.7018	0.8709	0.6821	0.8567
CER	CER(18:1)	Mol%	0.0354	0.0501	0.0343	0.0408	0.0447	0.0432	0.0473	0.0755	0.1135	0.1168	0.1062	0.0493	0.0556	0.0333	0.0215	0.06	0.0368	0.0629		0.0639	0.0593
CER	CER(20:0)	Mol%	1.0214	2.4087	1.8935	2.0622	2.0259	3.0791	2.2049	3.8451	3.6236	2.3609	5.0008	2.8086	2.7234	2.2839	1.7041	2.749	1.5	1.8308	2.2509	1.8147	2.1992
CER	CER(20:1)	Mol%	0.0301	0.0732	0.0561	0.0504	0.064	0.0877	0.0662	0.14	0.1618	0.1452	0.1938	0.0801	0.1215	0.0503	0.0406	0.1059	0.0507	0.0549	0.0778	0.0889	0.0902
CER	CER(22:0)	Mol%	24.3237	27.9579	27.7634	25.2077	25.4002	26.8462	27.2351	25.8442	31.7303	25.7901	28.0617	27.9591	24.6096	29.4895	26.9352	24.5642	22.7536	25.5504	25.3904	25.4112	25.4667
CER	CER(22:1)	Mol%	1.6861	2.4193	2.0727	2.5267	2.4134	2.2944	2.155	3.6016	2.6851	3.9732	3.5875	2.4957	2.4833	2.1731	2.1661	2.5468	2.1712	1.8257	2.0352	2.2991	2.2857
CER	CER(24:0)	Mol%	36.8935	28.2584	29.7776	26.8922	26.9282	27.5788	29.9743	24.6923	29.6432	28.2558	24.3031	28.8561	24.7207	30.7048	29.6229	24.2695	31.3088	32.3646	32.3116	30.5139	30.0529
CER	CER(24:1)	Mol%	30.9655	32.2842	32.5474	36.7567	36.5916	30.3052	30.0809	29.4611	22.4518	31.0972	26.5422	28.9855	30.5134	27.6929	33.9742	34.2876	34.5747	30.6928	29.8238	31.4367	31.7898
CER	CER(26:0)	Mol%	0.0836	0.0722	0.0662	0.0868	0.0745	0.0801	0.0675	0.0645	0.0862	0.1078	0.0783	0.0726	0.0919	0.0442	0.0634	0.0877	0.0569	0.0795	0.1096	0.0799	0.0779
CER	CER(26:1)	Mol%	0.0739	0.0934	0.0662	0.092	0.0859	0.0756	0.0795	0.1383	0.103	0.0973	0.0856	0.0904	0.0858	0.0619	0.0695	0.109	0.0812	0.0716	0.0919	0.0779	0.0964
DAG	DAG(12:0/16:0)	Mol%		0.0366	0.0492	0.0331				0.0432	0.0233	0.0143	0.0233	0.0223		0.05		0.0315				0.0321	0.0202
DAG	DAG(12:0/18:0)	Mol%		0.0518			0.0512											0.0486	0.0719
DAG	DAG(12:0/18:1)	Mol%	0.055	0.0571	0.0524	0.0496	0.0497	0.0522	0.0519	0.058	0.0824	0.0519	0.0565	0.0412	0.0547	0.0603	0.0771	0.0421	0.1001	0.0564	0.0719	0.0465	0.0463
DAG	DAG(12:0/18:2)	Mol%	0.0806	0.057	0.0712	0.0938	0.0764	0.084	0.0831	0.1231	0.2114	0.1041	0.1892	0.1066	0.1254	0.169	0.0907	0.0767	0.0936	0.0715	0.1262	0.0814	0.0872
DAG	DAG(14:0/14:0)	Mol%	0.0173	0.0173	0.0249	0.0187		0.0206		0.0207	0.0108	0.0117	0.0152		0.0155	0.0281	0.0377	0.0222	0.0223		0.018	0.0131	0.0151
DAG	DAG(14:0/16:0)	Mol%	0.2443	0.1728	0.1487	0.1363	0.1357	0.1559	0.1563	0.1962	0.1427	0.1689	0.1428	0.1872	0.1737	0.235	0.2061	0.1618	0.1697	0.1718	0.1482	0.128	0.1293
DAG	DAG(14:0/16:1)	Mol%	0.0482	0.0325	0.0247	0.0333	0.0282	0.0266	0.0309	0.0301	0.034	0.0525	0.0426	0.0283	0.0298	0.0771	0.0413	0.0247		0.0278	0.0321	0.0283	0.0298
DAG	DAG(14:0/18:1)	Mol%	0.2284	0.1561	0.1445	0.1333	0.1364	0.2008	0.131	0.1845	0.2749	0.2648	0.2603	0.1852	0.1928	0.1843	0.1458	0.1388	0.174	0.1775	0.1424	0.1773	0.1636
DAG	DAG(14:0/18:2)	Mol%	0.4303	0.3179	0.362	0.4085	0.3799	0.658	0.5041	0.8015	1.0655	0.9858	1.1031	0.7375	0.675	0.4396	0.4931	0.5869	0.4182	0.4186	0.4486	0.5513	0.4587
DAG	DAG(14:0/18:3)	Mol%	0.0394		0.0302	0.034	0.0231	0.0242		0.0363	0.0398	0.0214	0.0362	0.0188	0.0387		0.0326	0.025		0.0278		0.0215
DAG	DAG(14:0/20:0)	Mol%	0.069			0.0548		0.0447		0.0315	0.035	0.0316	0.0294		0.0298			0.0449	0.0939	0.0646	0.0499	0.049	0.0583
DAG	DAG(14:0/20:4)	Mol%	0.0294	0.018	0.0158	0.0257	0.0168	0.0138	0.0197	0.0171	0.0112	0.0136	0.0124	0.0168	0.0179	0.0156	0.0391	0.0197	0.0378	0.017	0.0185	0.0113	0.0131
DAG	DAG(14:0/22:6)	Mol%	0.0706	0.059	0.0498	0.0462	0.0503	0.09	0.087	0.0888	0.122	0.0763	0.0839	0.0698	0.0756	0.0539	0.063	0.0645	0.0626	0.0728	0.0635	0.0606	0.0535
DAG	DAG(14:1/16:0)	Mol%	0.0639	0.0556	0.0625	0.0378	0.0368	0.0332	0.0595	0.0417	0.0283	0.0266	0.0213	0.024	0.0386	0.0644	0.0728	0.0322	0.0477	0.0509	0.0628	0.0174	0.0433
DAG	DAG(14:1/18:1)	Mol%	0.0289	0.0254	0.0393	0.0281	0.0329	0.0225	0.0338	0.0398	0.0449	0.0369	0.0341	0.032	0.019	0.0344	0.0443	0.0293	0.0587	0.0393	0.1274	0.0323	0.0276
DAG	DAG(15:0/18:1)	Mol%	0.1313	0.1013	0.1098	0.0955	0.0896	0.0756	0.0995	0.078	0.0809	0.0968	0.096	0.077	0.0689	0.1126	0.1214	0.0798	0.1173	0.0954	0.0969	0.0976	0.1016
DAG	DAG(15:0/18:2)	Mol%	0.3851	0.313	0.3882	0.335	0.2882	0.2964	0.3279	0.3349	0.3572	0.3612	0.3589	0.3156	0.3453	0.3373	0.4624	0.3165	0.379	0.2542	0.3245	0.3097	0.3842
DAG	DAG(16:0/16:0)	Mol%	1.2373	1.1304	1.017	1.0282	1.0122	0.9474	0.9924	1.0735	0.7759	0.6973	0.8189	0.954	0.9922	1.2245	1.2215	1.1156	1.0675	1.1614	1.0303	1.0654	1.0936
DAG	DAG(16:0/16:1)	Mol%	0.5177	0.3172	0.2214	0.2716	0.2721	0.2378	0.1397	0.296	0.2244	0.3886	0.2785	0.2932	0.3176	0.2221	0.2973	0.2303	0.2543	0.1983	0.174	0.3455	0.2107
DAG	DAG(16:0/18:0)	Mol%	1.2828	1.3284	0.9577	1.0698	0.8584	0.7539	1.1287	1.133	0.7037	0.5758	0.559	0.8421	0.7236	1.1335	1.1192	0.9807	1.1144	1.0021	0.7259	0.6918	0.904
DAG	DAG(16:0/18:1)	Mol%	12.0327	9.9624	8.9788	9.7728	9.469	9.0556	8.6569	8.3729	6.451	8.618	7.8214	8.699	8.8958	9.1514	10.2559	8.9785	10.3267	9.84	8.7305	10.4457	9.448
DAG	DAG(16:0/18:2)	Mol%	24.2512	24.6853	27.8707	26.3029	26.2258	22.735	26.0493	24.1717	18.3631	19.0438	22.4387	22.3505	26.3959	24.931	27.4113	26.0597	24.6938	26.9976	24.5677	25.6476	25.7626
DAG	DAG(16:0/18:3)	Mol%	0.8066	0.7101	0.7978	0.6655	0.6792	0.6354	0.3858	0.6644	0.673	0.4686	0.6382	0.592	0.7947	0.6112	0.6733	0.7623	0.6553	0.6863	0.5327	0.8049	0.6771
DAG	DAG(16:0/20:3)	Mol%	1.4555	0.8676	0.9262	0.9396	0.9936	0.2894	0.4384	0.2695	0.312	0.3573	0.2436	0.2886	0.2996	0.4374	0.9891	0.4297	1.0176	0.8999	0.5983	0.3726	0.4954
DAG	DAG(16:0/20:4)	Mol%	4.1491	2.8219	3.0982	3.379	3.361	1.2864	2.4255	1.2387	0.932	1.1928	0.7831	1.0426	1.4837	1.8642	3.099	2.151	3.4406	2.6628	2.1542	1.3122	1.8626
DAG	DAG(16:0/20:5)	Mol%	0.7396	0.4615	0.6051	0.4448	0.4625	0.2225	0.3878	0.31	0.1757	0.1129	0.1612	0.2233	0.253	0.2655	0.4822	0.3755	0.4678	0.4117	0.4149	0.2361	0.2871
DAG	DAG(16:0/22:5)	Mol%	1.2297	0.9517	0.8554	0.9442	0.9581	0.6921	0.8638	0.8677	0.5124	0.4615	0.5227	0.6969	0.792	0.7349	0.8403	0.8935	0.7878	0.9657	0.835	0.8519	0.9049
DAG	DAG(16:0/22:6)	Mol%	6.7616	6.1331	6.683	6.0327	6.194	3.9158	5.9123	3.8578	2.5777	2.2071	2.6091	3.5363	4.2148	5.0088	6.2585	5.0339	5.9468	5.6625	4.6366	3.636	4.793
DAG	DAG(16:1/16:1)	Mol%	0.0646	0.0307	0.0239	0.0309	0.0274	0.0293	0.0124	0.0413	0.0476	0.1176	0.0538	0.0321	0.0477	0.042	0.0331	0.0234	0.0358	0.0277	0.022	0.0387	0.0235
DAG	DAG(16:1/18:0)	Mol%	0.1583	0.1029	0.0959	0.0987	0.0903	0.0951	0.064	0.1007	0.0821	0.1253	0.1184	0.0875	0.0932	0.0947	0.1442	0.077	0.1712	0.1064	0.089	0.0973	0.0817
DAG	DAG(16:1/18:1)	Mol%	0.762	0.6955	0.4127	0.551	0.5261	0.7062	0.3477	0.6672	0.9026	1.4485	1	0.7795	0.6686	0.5021	0.5379	0.4701	0.5527	0.4621	0.5357	0.8174	0.5042
DAG	DAG(16:1/18:2)	Mol%	2.1017	2.397	1.8471	2.2854	2.2499	2.7863	1.6439	3.2449	4.4899	5.8288	4.7951	3.4692	3.4067	2.0558	2.1509	2.5384	1.8238	1.8214	1.9507	3.243	2.3074
DAG	DAG(16:1/18:3)	Mol%	0.0856	0.0687	0.0596	0.0718	0.0626	0.0788	0.0319	0.1112	0.1415	0.1244	0.1168	0.1	0.0931	0.0613	0.0733	0.0653	0.0702	0.0568	0.0606	0.0919	0.0586
DAG	DAG(16:1/20:0)	Mol%	0.1261	0.067	0.0741	0.0644	0.078	0.0554		0.0888	0.0724	0.0855	0.0515	0.0689	0.0713		0.1048	0.0556	0.1314	0.0675	0.1023	0.0744	0.0524
DAG	DAG(16:1/20:2)	Mol%	0.1009	0.1039	0.1086	0.1192	0.0986	0.1328	0.0989	0.1163	0.1644	0.1674	0.1424	0.1365	0.1036	0.1054	0.1013	0.1311	0.1289	0.1047	0.1309	0.1432	0.1205
DAG	DAG(16:1/20:4)	Mol%	0.0947	0.0851	0.075	0.0968	0.0863	0.0462	0.0396	0.0469	0.053	0.0955	0.0565	0.0447	0.0474	0.0824	0.1284	0.0629	0.1097	0.073	0.0412	0.0477	0.045
DAG	DAG(16:1/22:6)	Mol%	0.327	0.2619	0.2034	0.2449	0.2535	0.2991	0.2327	0.3017	0.4566	0.4881	0.366	0.3328	0.3491	0.267	0.2463	0.2772	0.282	0.2092	0.2154	0.3239	0.2535
DAG	DAG(18:0/18:1)	Mol%	0.8012	0.782	0.7929	0.6724	0.6681	0.7199	0.663	0.5806	0.6347	0.558	0.6229	0.5884	0.4599	0.7379	0.7977	0.539	0.862	0.7214	0.6832	0.4921	0.531
DAG	DAG(18:0/18:2)	Mol%	7.1744	7.2875	8.8053	6.8915	6.9674	4.2973	5.9141	4.7767	3.6906	2.6717	3.8377	3.6583	3.9529	4.977	7.5924	4.8004	8.3221	6.6587	6.0788	3.0208	4.4823
DAG	DAG(18:0/18:3)	Mol%	0.1769	0.1801	0.2383	0.1778	0.173	0.1866	0.1415	0.1973	0.2291	0.1488	0.1839	0.1693	0.1794	0.1749	0.2085	0.1593	0.2321	0.1794	0.1688	0.176	0.1531
DAG	DAG(18:0/22:6)	Mol%	2.7222	2.3074	2.4827	2.1257	2.1865	1.4092	2.7486	1.4993	1.059	0.6933	0.8726	1.3748	1.6341	2.2745	2.4414	1.6773	2.5011	1.976	1.7404	0.9858	1.4872
DAG	DAG(18:1/18:1)	Mol%	2.5882	3.3159	2.0856	2.5824	2.4483	3.9849	2.3712	3.0519	3.873	4.2362	3.6527	3.5918	2.6124	2.8226	2.32	2.3022	2.4213	2.4314	2.5157	3.2418	2.6967
DAG	DAG(18:1/18:2)	Mol%	14.9904	20.1275	17.4943	19.5161	19.8867	29.9094	20.0684	27.2048	30.285	28.6019	30.6895	30.3568	25.0698	22.5009	17.9528	22.5317	17.797	20.1577	24.0509	25.4771	23.948
DAG	DAG(18:1/20:1)	Mol%	0.325	0.2963	0.283	0.2426	0.2449	0.2998	0.3283	0.3057	0.3976	0.7409	0.3155	0.3585	0.2226	0.3412	0.3187	0.2445	0.3181	0.2681	0.3311	0.3318	0.2946
DAG	DAG(18:1/20:2)	Mol%	0.3909	0.3118	0.3563	0.2842	0.2502	0.2753	0.3217	0.311	0.5011	0.881	0.3672	0.3683	0.221	0.4062	0.369	0.258	0.4269	0.3928	0.399	0.3179	0.3193
DAG	DAG(18:1/20:3)	Mol%	0.7333	0.5893	0.5593	0.5737	0.5702	0.4271	0.3902	0.3672	0.6519	0.9346	0.4273	0.4512	0.3499	0.4857	0.5487	0.3612	0.6494	0.5906	0.4819	0.4378	0.4486
DAG	DAG(18:1/20:4)	Mol%	1.1733	1.0496	0.9197	0.9765	0.9482	0.6226	0.855	0.5597	0.7554	1.1159	0.5505	0.5486	0.5913	0.7669	0.9215	0.6784	1.2204	0.8093	0.7327	0.5791	0.6571
DAG	DAG(18:1/20:5)	Mol%	0.3319	0.2773	0.2892	0.2955	0.3493	0.3338	0.3689	0.4136	0.301	0.2612	0.2766	0.3486	0.4708	0.2637	0.2826	0.3657	0.2797	0.2569	0.3011	0.3575	0.3193
DAG	DAG(18:1/22:4)	Mol%	0.0615	0.0435	0.041	0.0603	0.0536	0.0777	0.0605	0.0565	0.0802	0.1371	0.0558	0.071	0.0692	0.065	0.0453	0.053	0.0646	0.0393	0.067	0.0579	0.0597
DAG	DAG(18:1/22:5)	Mol%	0.6217	0.5585	0.4453	0.5757	0.6308	0.6683	0.8194	0.8313	0.9486	0.9275	0.6687	0.8273	0.714	0.7726	0.5207	0.7484	0.5741	0.6272	0.8123	0.8277	0.802
DAG	DAG(18:1/22:6)	Mol%	2.9878	2.7273	2.6307	2.8558	2.94	2.7497	4.285	2.7701	4.2656	4.1585	2.9819	3.0799	2.9276	4.0957	2.421	3.5347	3.2492	3.0888	3.6204	3.3139	3.5413
DAG	DAG(18:2/18:3)	Mol%	0.6935	0.7939	0.8497	0.9909	0.8913	1.2732	0.6203	1.2822	1.7547	0.9953	1.5121	1.2338	1.4618	0.8977	0.7065	1.1427	0.6172	0.9266	0.9364	1.3177	1.1095
DAG	DAG(18:2/20:3)	Mol%	0.4242	0.4468	0.4856	0.4238	0.4464	0.4085	0.4323	0.4187	0.7829	0.8435	0.5695	0.4606	0.3652	0.4343	0.4735	0.3464	0.4847	0.5485	0.4863	0.4399	0.4563
DAG	DAG(18:2/20:4)	Mol%	0.6593	0.725	0.8675	0.7213	0.7447	0.7121	1.04	0.6438	0.8141	0.9981	0.6858	0.6396	0.7972	0.9264	0.7876	0.8424	0.8228	0.652	0.7416	0.5936	0.6823
DAG	DAG(18:2/20:5)	Mol%	0.2954	0.3167	0.3211	0.3555	0.3558	0.4907	0.5122	0.6519	0.5222	0.3387	0.4441	0.5731	0.7564	0.3791	0.2905	0.6093	0.2053	0.3023	0.3709	0.5378	0.4292
DAG	DAG(18:2/22:4)	Mol%	0.0574	0.0763	0.0699	0.0785	0.086	0.1203	0.1039	0.1198	0.1369	0.2073	0.1049	0.123	0.1157	0.1189	0.0676	0.1061	0.0947	0.0854	0.114	0.1064	0.1157
DAG	DAG(18:2/22:5)	Mol%	0.5755	0.6181	0.6195	0.7549	0.7504	0.9957	1.3402	1.3245	1.5489	1.2397	1.135	1.109	1.1664	1.0715	0.5943	1.3292	0.7675	0.9482	1.2515	1.2019	1.3477
DAG	DAG(18:2/22:6)	Mol%	2.0097	2.5158	2.8783	2.8668	3.0541	3.2392	5.1791	3.5339	6.0923	4.3873	3.9655	3.636	3.9182	4.8304	2.2445	4.9135	3.1649	3.3762	4.8373	4.2411	4.6018
DCER	DCER(14:0)	Mol%		1.0819			0.9641			1.0012		2.1408	1.2235		1.5496	0.9352	0.9932		0.8297		0.9387	1.4328	1.4497
DCER	DCER(16:0)	Mol%	5.5773	5.6429	5.1025	5.4705	5.8186	9.7563	8.4564	13.602	9.1525	7.2115	10.1647	8.9461	14.3165	6.4055	5.6926	11.0155	7.8804	6.5893	6.0666	8.5395	6.7047
DCER	DCER(18:0)	Mol%	0.9378	1.5602	1.1339	1.5831	1.4348	3.2005	2.2104	5.3213	3.3149		3.7763	2.2983	3.4205	1.6971	0.8115	1.9115	1.2338	1.5356	1.7583	1.2142	1.7047
DCER	DCER(20:0)	Mol%	2.1092	3.798	3.5481	3.8522	3.9358	4.7307	3.3398	6.0694	5.8977	4.555	8.5602	5.0727	5.1287	4.0593	2.5879	4.1218	2.5283	4.4119	3.944	3.2225	3.8322
DCER	DCER(20:1)	Mol%
DCER	DCER(22:0)	Mol%	23.8722	23.6249	24.0008	20.8502	21.783	26.791	25.6517	24.8386	24.3179	19.3062	25.3842	28.6962	22.4387	26.1378	23.5859	21.7734	20.9262	22.8107	20.4904	21.4294	20.8121
DCER	DCER(22:1)	Mol%	2.2704	3.1261	2.8064	2.9845	3.4027	2.452	2.159	2.6588	4.0471	4.5941	3.9456	2.5345	3.3188	3.2813	2.0994	2.1691	2.2677	2.786	3.4676	2.8657	3.7383
DCER	DCER(22:2)	Mol%	1.915	1.8848	1.9512	2.1812	2.3252	2.0316	1.6941	1.3166	2.5276	2.633	1.6214	1.704	2.4118	1.3545	2.0711	1.963	1.7594	2.0491	2.1156	2.1234	2.1879
DCER	DCER(24:0)	Mol%	28.0544	19.0411	21.6857	19.4782	19.4692	18.7899	21.7957	15.8097	18.2197	16.3138	13.4965	20.2048	17.3628	20.861	21.8943	16.1214	22.7508	21.9407	19.2154	21.0899	17.2617
DCER	DCER(24:1)	Mol%	31.766	34.5519	35.6373	39.5603	37.0952	27.3994	31.5641	26.4522	27.7833	37.3779	28.1233	27.1497	30.0525	30.9469	34.527	36.8592	35.8443	33.7691	35.8739	29.3935	37.4362
DCER	DCER(26:0)	Mol%	2.1289	3.3197	2.3481	2.1753	1.5993	3.4254	1.8111	1.4119	2.994	3.2737	2.4808	1.6682		2.3098	4.2755	2.3906	2.1721	2.3866	3.8739	6.8477	2.4362
DCER	DCER(26:1)	Mol%	1.3688	2.3688	1.7859	1.8646	2.1721	1.4233	1.3177	1.5183	1.7452	2.594	1.2235	1.7255		2.0115	1.4615	1.6745	1.8072	1.721	2.2557	1.8414	2.4362
FFA	FFA(12:0)	Mol%	0.7887	1.203	0.9122	0.9685	0.9144	0.9078	0.9032	0.8225	1.1874	0.7233	0.841	0.7104	0.7126	0.9993	0.8648	0.7891	0.9541	0.9659	0.8636	0.8378	1.026
FFA	FFA(14:0)	Mol%	2.1117	2.7486	2.2637	2.3754	2.2833	2.3722	2.1851	2.2731	3.0905	2.2987	2.4285	2.0789	2.0564	2.9851	2.2132	2.0717	2.397	2.4332	2.1635	2.1247	2.5055
FFA	FFA(14:1)	Mol%	0.468	0.6699	0.5513	0.5365	0.5357	0.5099	0.5231	0.5581	0.6898	0.4818	0.5471	0.448	0.4616	0.5921	0.5339	0.4928	0.5175	0.5884	0.5587	0.5101	0.5842
FFA	FFA(15:0)	Mol%	1.3089	1.8132	1.4198	1.3991	1.4246	1.4447	1.4944	1.2354	1.7145	1.3218	1.3607	1.2187	1.2276	1.7783	1.298	1.1711	1.3544	1.534	1.297	1.2479	1.5707
FFA	FFA(16:0)	Mol%	33.601	37.5544	33.4453	34.5682	33.8476	36.2083	33.6283	34.9269	35.6375	31.6105	32.7328	33.3791	34.3329	37.327	34.7355	33.6467	35.1106	35.6674	33.4185	33.7416	34.8773
FFA	FFA(16:1)	Mol%	2.1756	2.0966	1.6124	1.7612	1.8291	2.2601	1.5826	2.2214	3.35	4.5328	3.49	2.9834	2.2566	1.9779	1.6052	1.7552	1.4865	1.527	1.4491	2.1243	1.6089
FFA	FFA(17:0)	Mol%	1.001	1.1099	1.0865	1.0782	1.079	0.9821	1.0511	0.9384	0.9821	0.9495	0.925	0.923	0.9324	1.2005	1.1041	0.9622	1.1502	1.0765	1.1223	1.0383	1.1033
FFA	FFA(18:0)	Mol%	17.5675	15.0346	17.6773	17.4118	16.4065	14.8752	15.6921	16.5818	11.9216	13.6129	12.4577	13.2745	15.9264	22.3663	19.3362	16.5999	20.6303	18.1828	18.0628	16.3289	17.1103
FFA	FFA(18:1)	Mol%	8.4642	9.139	8.2606	8.4883	9.0644	10.4954	8.8371	9.8442	11.1911	12.6437	12.4913	12.4914	9.7272	6.9832	7.4808	8.6898	7.3588	7.8874	8.8168	10.4025	8.5923
FFA	FFA(18:2)	Mol%	10.2368	12.3916	12.8738	12.1219	13.0258	15.0596	12.9047	14.7025	16.371	14.4106	17.3903	16.4402	15.0207	9.3986	11.5304	14.4309	9.8429	11.5015	12.9298	14.5576	13.2099
FFA	FFA(18:4)	Mol%	0.2414	0.2759	0.2837	0.2747	0.2979	0.2705	0.232	0.277	0.2633	0.2284	0.2776	0.2562	0.2549	0.2356	0.3022	0.2908	0.2757	0.2699	0.3149	0.3191	0.3139
FFA	FFA(20:0)	Mol%	0.5749	0.4983	0.569	0.5323	0.5577	0.4909	0.5504	0.5394	0.3873	0.5141	0.4344	0.4528	0.4933	0.6168	0.653	0.4956	0.6477	0.5421	0.629	0.6082	0.565
FFA	FFA(20:1)	Mol%	0.3885	0.3104	0.3522	0.3339	0.3455	0.3202	0.3748	0.3428	0.3653	0.6156	0.3701	0.3801	0.3219	0.2785	0.3471	0.3106	0.3669	0.3198	0.3751	0.3812	0.3483
FFA	FFA(20:2)	Mol%	0.5388	0.3271	0.3966	0.3584	0.3488	0.3242	0.4559	0.3252	0.4157	0.6441	0.4135	0.43	0.3423	0.2875	0.3729	0.2865	0.3917	0.3826	0.3836	0.365	0.338
FFA	FFA(20:3)	Mol%	1.5142	0.9096	1.0472	1.0461	1.0636	0.5979	0.7477	0.6135	0.6366	0.9013	0.6795	0.6868	0.6806	0.5596	1.0766	0.7151	0.9889	1.0107	0.891	0.744	0.7546
FFA	FFA(20:4)	Mol%	6.7976	5.3427	6.093	6.2881	6.2023	3.8086	5.435	3.4521	2.8116	4.1518	3.2076	3.6657	4.3866	3.3819	5.8362	5.2468	5.9219	5.4536	5.141	3.9593	4.5937
FFA	FFA(20:5)	Mol%	2.2233	1.5924	2.0945	1.788	1.807	1.3127	1.849	1.6744	1.1836	1.3444	1.5851	1.4555	1.6395	1.2656	2.0183	2.1796	1.7202	1.6072	1.7779	1.6786	1.7826
FFA	FFA(22:0)	Mol%	0.3375	0.2505	0.3239	0.3324	0.329	0.2984	0.3416	0.3382	0.2397	0.3215	0.2823	0.3042	0.3197	0.3556	0.3838	0.3339	0.4044	0.3339	0.418	0.3934	0.396
FFA	FFA(22:1)	Mol%	0.9208	0.741	1.0202	1.0054	0.9409	0.9202	0.7914	1.2513	0.7608	0.9487	1.0346	0.9857	1.094	1.3302	1.0994	1.1232	1.2599	0.9197	1.1618	1.1951	1.1929
FFA	FFA(22:2)	Mol%	0.1368	0.1166	0.1281	0.1331	0.1267	0.1239	0.1112	0.1503	0.1462	0.2042	0.1681	0.1565	0.1418	0.1434	0.1474	0.1344	0.154	0.1275	0.1656	0.1586	0.1515
FFA	FFA(22:4)	Mol%	0.2344	0.2145	0.2314	0.2503	0.2597	0.2866	0.2645	0.281	0.2591	0.3775	0.2621	0.2694	0.2467	0.2126	0.262	0.2613	0.2606	0.248	0.2962	0.2867	0.2994
FFA	FFA(22:5)	Mol%	0.8837	0.7475	0.8562	0.8884	0.9509	0.9183	1.1304	1.0785	0.9643	1.167	0.9864	0.9969	1.0189	0.7662	0.8694	1.1052	0.8328	0.8924	1.0265	1.0727	1.0755
FFA	FFA(22:6)	Mol%	6.7717	4.3905	5.7691	5.3391	5.6882	4.6708	8.3369	4.7827	5.0093	5.4129	5.0981	5.4875	5.6814	3.9223	5.0564	6.1736	4.9981	5.7776	5.6745	5.1383	5.2104
FFA	FFA(24:0)	Mol%	0.1794	0.1287	0.1797	0.1794	0.1768	0.1301	0.1612	0.1773	0.1006	0.1668	0.1212	0.1337	0.16	0.1908	0.2073	0.1651	0.2096	0.1763	0.39	0.1861	0.1901
FFA	FFA(24:1)	Mol%	0.5336	0.3934	0.5522	0.5415	0.4946	0.4113	0.4164	0.612	0.3211	0.416	0.4149	0.3914	0.5641	0.8449	0.6661	0.569	0.7653	0.5745	0.6728	0.6	0.5997
HCER	HCER(14:0)	Mol%			0.1749	0.1168	0.1245		0.1159		0.1885			0.1972	0.1869	0.1605	0.178		0.177	0.155		0.2189
HCER	HCER(16:0)	Mol%	10.4639	10.7688	9.3734	12.0324	11.6012	21.2772	14.8721	16.7267	25.8753	13.8632	23.4678	18.3115	21.4355	20.219	9.5605	17.2677	12.9056	13.3785	15.0167	14.8606	14.3935
HCER	HCER(18:0)	Mol%	0.7427	1.262	0.8782	1.2045	1.2169	3.5557	1.5856	3.6707	2.4783	0.9591	3.4552	2.2425	2.7675	1.5433	0.8391	1.9758	1.105	1.6098	1.5269	1.1207	1.4168
HCER	HCER(18:1)	Mol%		0.1451	0.2233		0.1687	0.2583	0.1434	0.2466		0.2535	0.2606	0.3577	0.3071	0.2313	0.2543	0.1551	0.3057	0.2151	0.2528	0.2033
HCER	HCER(20:0)	Mol%	4.4393	7.096	6.3928	6.6795	6.6504	10.6823	7.0558	11.989	6.6425	5.3872	9.6558	8.7224	10.1519	6.617	5.577	8.1426	5.7448	7.0403	7.3314	5.4939	6.9209
HCER	HCER(20:1)	Mol%		0.1218		0.1584	0.1505	0.2849	0.1886	0.4316	0.2862	0.2535	0.2965	0.3073	0.2571	0.2077	0.2331	0.1878		0.2688	0.2275		0.1236
HCER	HCER(22:0)	Mol%	45.0228	47.1976	48.3813	45.6219	45.4137	37.7754	43.3548	40.3016	35.4114	41.1037	34.2514	40.5898	36.1342	37.71	45.6838	41.7417	39.4411	42.7794	42.2894	41.5116	44.2576
HCER	HCER(22:1)	Mol%	1.9349	2.5791	2.3257	2.8841	2.9113	2.1045	2.2753	3.2059	2.0524	3.3802	2.5207	2.7332	2.437	1.6849	2.0892	2.6861	1.9525	1.9609	2.1893	2.5228	2.4453
HCER	HCER(24:0)	Mol%	24.5213	17.0931	18.4193	16.1756	15.9319	14.1088	18.7055	14.033	16.4892	19.4068	15.0431	15.6058	14.7655	19.1193	20.9137	14.3693	24.5561	20.2606	19.0161	20.7193	16.8079
HCER	HCER(24:1)	Mol%	12.7385	13.7366	13.727	15.0593	15.579	9.573	11.5908	9.3949	10.5763	15.1181	11.0487	10.3916	11.0132	12.3702	14.5061	13.4739	13.8122	12.3316	11.9476	13.1509	13.3607
HCER	HCER(26:0)	Mol%	0.1365			0.0675	0.1194	0.1633	0.112					0.2935	0.2938								0.1236
HCER	HCER(26:1)	Mol%			0.1042		0.1323	0.2165				0.2746		0.2476	0.2504	0.1369	0.1653				0.2022	0.1981	0.1501
LCER	LCER(14:0)	Mol%	2.5027		1.4247	2.5676	2.3104			1.5324			1.868		2.0841	2.5755	1.817		2.5659		2.084	1.7564	1.6733
LCER	LCER(16:0)	Mol%	10.0935	7.2126	7.2749	8.0068	8.0569	9.9923	6.4167	6.8369	9.2231	8.9231	8.2192	9.434	8.1822	7.4519	5.6191	6.4677	8.1967	8.6327	6.6102	6.8386	6.1753
LCER	LCER(18:0)	Mol%	6.0231	5.5433	5.3653	6.0135	5.391	6.4181	5.0828	7.4656	5.3223	5.641	5.3134	6.9811	5.5191	5.6319	6.5612	6.0057	6.4148	6.0368	6.3172	5.9043	6.5339
LCER	LCER(18:1)	Mol%	27.4477	31.811	33.7375	27.3311	29.3246	21.5988	17.3413	20.3929	19.8016	23.6239	22.2914	19.6981	18.9502	27.4038	28.533	24.4847	35.3528	28.524	26.7014	25.5605	28.0876
LCER	LCER(20:0)	Mol%	4.0429	3.2756	3.9103	4.3919	4.2358	5.9954	4.5998	5.5796	3.9339	5.1282	4.5662	6.4151	5.9822	4.3956	5.7201	5.4016	4.8824	5.2822	4.2983	4.8206	3.0279
LCER	LCER(20:1)	Mol%	3.4653	3.2756	2.5765	3.1081	3.673	2.8055	3.2429	3.5363	2.843	2.8376	3.3209	3.6981	2.5087	3.0907	2.9946	3.3049	2.9579	3.441	3.4516	3.4006	2.9084
LCER	LCER(22:0)	Mol%	24.3124	25.7953	23.2495	25.5743	22.9562	33.9739	36.4305	36.3065	39.4711	31.7265	35.1598	32.4151	38.0934	32.5206	22.8802	34.435	19.0663	26.5017	30.0228	33.4828	32.9881
LCER	LCER(22:1)	Mol%	2.9978	3.1181	3.0615	5.0676	3.91	6.8409	4.7148	6.4047	6.0165	5.0598	7.1814	5.1698	6.677	4.4986	4.6433	6.3966	3.3856	4.7389	4.917	6.7638	6.0159
LCER	LCER(24:0)	Mol%	11.6062	11.4646	9.4271	7.8378	9.0344	6.764	12.9485	6.8369	7.8017	8.9231	6.2267	8	6.1366	7.3146	10.8681	6.4321	9.8004	8.8138	7.3917	6.2033	6.6932
LCER	LCER(24:1)	Mol%	7.5083	8.5039	9.9727	10.1014	9.5379	5.6111	9.2226	5.1081	5.5868	8.1368	5.8531	6.9434	5.8665	5.1168	10.3634	7.0718	7.377	8.029	6.6102	5.2691	5.8964
LCER	LCER(26:0)	Mol%					1.5699							1.2453							1.5956
LCER	LCER(26:1)	Mol%
LPC	LPC(14:0)	Mol%
LPC	LPC(15:0)	Mol%
LPC	LPC(16:0)	Mol%	45.2544	37.689	40.2017	42.5545	41.8665	50.0918	44.2379	44.7068	35.55	43.0902	42.3665	46.3291	42.5182	46.1427	43.3422	43.6749	43.1274	40.8584	40.2789	44.7891	40.3051
LPC	LPC(16:1)	Mol%
LPC	LPC(17:0)	Mol%
LPC	LPC(18:0)	Mol%	36.0795	42.3198	44.0203	40.6021	38.0966	36.6505	37.6911	37.8379	34.7895	29.3443	33.2798	36.864	37.9197	35.936	41.1252	41.0488	38.4729	42.6121	43.1361	39.0737	43.3432
LPC	LPC(18:1)	Mol%	5.225	5.3091	3.7346	4.1385	6.2173	4.7108	4.5889	4.7885	6.7641	6.257	5.4444	4.6551	5.0064	5.0326	4.4709	3.3241	5.0672	3.7489	3.8887	4.657	3.8452
LPC	LPC(18:2)	Mol%	4.6346	5.7605	4.4064	4.1385	5.0597	4.5722	4.5889	5.9856	7.7439	7.2253	8.4258	5.1411	5.8468	6.7026	4.9141	4.5866	4.7368	5.3656	4.3647	4.2336	4.8421
LPC	LPC(18:3)	Mol%
LPC	LPC(20:0)	Mol%	3.4838	3.9604	3.701	4.1385	4.0679	3.9747	3.6402	3.7743	10.5035	6.7421	7.3075	5.0241	3.8032	6.1861	2.9564	3.3899	3.9936	3.2327	4.405	3.9796	3.7024
LPC	LPC(20:1)	Mol%
LPC	LPC(20:2)	Mol%
LPC	LPC(20:3)	Mol%	1.6212																1.0806	1.0795
LPC	LPC(20:4)	Mol%	1.5865	2.0805	1.7013	2.2811	1.6493		1.7607			3.424			1.5285		1.3909	2.1302	1.5607	1.3492	1.5179	1.2737	2.1332
LPC	LPC(20:5)	Mol%
LPC	LPC(22:4)	Mol%
LPC	LPC(22:5)	Mol%
LPC	LPC(22:6)	Mol%	2.1151	2.8807	2.2348	2.147	3.0426		3.4923	2.9068	4.649	3.9171	3.1761	1.9866	3.3772		1.8004	1.8456	1.9608	1.7537	2.4088	1.9934	1.8288
LPE	LPE(16:0)	Mol%	28.8194	26.7059	27.2416	27.6387	29.2542	34.3689	31.0199	33.7059	27.9644	28.2412	34.7309	33.5173	30.7517	34.0471	27.6075	32.9303	30.8674	29.1523	33.1929	33.4768	32.9689
LPE	LPE(16:1)	Mol%
LPE	LPE(17:0)	Mol%	0.5134	0.5235	0.6466		0.579		0.7449					0.4415			0.5585	0.6145	0.5079	0.6242
LPE	LPE(18:0)	Mol%	49.1064	53.1735	55.3469	52.1378	50.7453	50.6908	50.2007	51.1527	45.826	39.6254	43.9425	50.4199	50.565	50.5724	55.6842	51.2677	52.759	53.8834	52.3581	50.3495	52.1005
LPE	LPE(18:1)	Mol%	4.0201	4.2835	4.6203	4.3282	4.3115	2.7693	2.8337	3.2378	4.4084	6.1946	4.6823	3.129	3.605	3.2888	4.0855	3.8571	4.1916	3.966	3.8735	3.969	4.232
LPE	LPE(18:2)	Mol%	1.5988	1.6031	1.2318	1.7565	1.4043	1.2034	1.6959	1.8337	3.0665	3.4016	2.8958	1.6749	1.4493	1.0104	1.4007	1.1185	1.1331	1.2042	1.2469	1.2912	1.2686
LPE	LPE(20:0)	Mol%	1.0055	1.0493	1.3085	0.9677	1.0175	0.9502	0.8651	0.4493	1.3892	1.5003	1.0061	0.8686	0.842	1.3659	1.133	0.6697	0.9117	0.9987	0.8168	0.8984
LPE	LPE(20:1)	Mol%	0.8918	1.0352	0.9907	0.8309	0.8155		0.7943	0.5195		1.84		0.7607	0.5008	0.7669	0.8125	0.7338	1.1114	0.6242	0.583	0.7742	0.7391
LPE	LPE(20:2)	Mol%	0.485												0.45				0.2583
LPE	LPE(20:3)	Mol%	0.7532	1.0072	0.6115	1.0676	0.7022		0.7084	0.4325	1.4537	1.4106					0.5768	0.4686	0.432	0.8162	0.5195	0.6297
LPE	LPE(20:4)	Mol%	4.649	5.2136	3.3578	5.8401	5.3044	3.1131	4.1861	3.3922	5.432	8.6384	4.5599	2.9203	4.0478	3.5267	3.2707	3.6781	4.0158	4.0101	4.3151	4.047	4.3901
LPE	LPE(22:4)	Mol%
LPE	LPE(22:5)	Mol%	0.8118		0.5633		0.51	0.8408	0.5624	0.6178	1.4537	1.4767	1.5263	0.7463	0.842	0.4478	0.4784	0.546	0.5231	0.4609		0.6413	0.7666
LPE	LPE(22:6)	Mol%	7.3456	5.4052	4.0811	5.4326	5.3561	6.0636	6.3886	4.6587	9.0061	7.6713	6.6562	5.5214	6.9464	4.9738	4.3922	4.1157	3.2886	4.2598	3.0942	3.9228	3.5341
MAG	MAG(12:0)	Mol%	0.6984	0.4519	1.1816	0.5464	0.6511	0.4845	0.4225	0.2628	0.3093	0.6492	0.8299	0.3008	0.4514	0.6363	0.9628	0.5509	1.0181	0.691	1.4673	0.7955	0.6365
MAG	MAG(14:0)	Mol%	2.9941	3.0282	2.6642	2.7712	2.4419	2.0427	2.3297	2.7297	2.0751	2.237	2.1604	2.3568	2.5048	2.4931	2.7786	2.6563	2.8482	2.9938	2.5119	2.6705	2.051
MAG	MAG(14:1)	Mol%	0.4855	0.2621	0.5453	0.3856	0.4135	0.2887	0.2819	0.1244	0.1429	0.4285	0.3437	0.1968	0.2982	0.4601	0.4895	0.2381	0.4401	0.5632	0.6825	0.2937	0.3206
MAG	MAG(15:0)	Mol%	18.8541	12.9845	28.5035	15.3307	19.5501	12.9496	12.9161	6.5452	9.2633	13.8592	15.1095	6.4299	10.8597	20.3259	25.2128	12.3254	20.9928	17.389	30.0908	16.7605	16.4989
MAG	MAG(16:0)	Mol%	18.5576	22.6802	15.5914	20.1536	18.257	19.4096	21.1334	23.8894	19.932	15.5798	15.3139	20.4719	20.3445	19.4981	17.8559	19.8843	19.1173	19.765	13.4075	18.1014	18.9023
MAG	MAG(16:1)	Mol%	2.188	1.4542	2.7362	1.3682	2.2569	1.4948	1.373	0.7295	1.373	1.9017	2.5184	0.9773	1.1938	2.7971	2.9903	1.6518	2.4666	1.7082	3.4096	2.0622	1.5783
MAG	MAG(17:0)	Mol%	1.7186	1.8638	1.3918	1.4334	1.5878	1.6263	1.8837	2.1935	1.6979	1.201	1.0332	1.4813	1.7029	2.0059	1.3279	1.8276	1.6644	1.6711	1.1838	1.7459	1.6986
MAG	MAG(18:0)	Mol%	37.5033	47.9659	30.3005	43.6078	39.6506	37.2692	47.6065	55.0275	40.4785	29.0318	24.7765	43.0558	40.6963	37.5686	36.6068	45.6436	40.0484	41.9059	21.5471	35.9624	40.7362
MAG	MAG(18:1)	Mol%	3.6868	2.4087	3.0694	3.7031	3.5786	9.6152	2.7557	2.4505	9.1023	13.9642	13.8331	9.1408	5.9187	3.7326	2.0323	4.4197	2.1662	3.1413	6.7221	7.4516	5.5095
MAG	MAG(18:2)	Mol%	3.1715	2.1482	3.8155	4.906	4.6612	8.9229	3.0176	2.815	10.4045	12.2146	15.736	10.0896	8.5316	4.1572	2.2391	5.6387	1.8349	3.4432	5.6197	7.024	6.4466
MAG	MAG(18:3)	Mol%	0.3996	0.2483	0.4469	0.3721	0.4571	0.6012	0.2454	0.19	0.3766	0.3793	0.7746	0.4517	0.5289	0.4482	0.3522	0.2892	0.4693	0.3577	0.9266	0.5567	0.3866
MAG	MAG(18:4)	Mol%	0.3286			0.1608	0.1985										0.315	0.1521			0.5276
MAG	MAG(20:0)	Mol%	0.8438	0.5634	0.8862	0.4362	0.6315	0.4928	0.5735	0.5974	0.5321	0.5035	0.4619	0.4992	0.5487	0.6055	0.6559	0.5008	0.6723	0.5853	0.9187	0.731	0.5894
MAG	MAG(20:1)	Mol%	0.3217		0.4033	0.2338	0.3293	0.3558	0.2268	0.1365	0.4613	0.826	0.5967	0.2307	0.2676	0.2744	0.3716	0.2589	0.3572	0.3449	0.6903	0.4179	0.3878
MAG	MAG(20:2)	Mol%		0.2383	0.5321	0.2226	0.3082	0.273	0.1992	0.1027	0.2751	0.3943	0.4586	0.2097	0.2135	0.3371	0.2504	0.2476			0.7586	0.3695	0.2169
MAG	MAG(20:3)	Mol%	0.332	0.1983	0.3825	0.3429	0.3128		0.2268	0.1056	0.2372	0.5646	0.2409	0.2399	0.2415	0.2649	0.3215	0.2211	0.3507	0.2694	0.4567		0.2499
MAG	MAG(20:4)	Mol%	0.4717	0.2821	0.7233	0.3923	0.4902	0.3916	0.3384	0.2358	0.4523	0.7371	0.5614	0.4749	0.4091	0.2827	0.5024	0.2022	0.3459	0.2961	0.6063	0.4486	0.277
MAG	MAG(20:5)	Mol%	0.3126	0.2421	0.3408	0.2069	0.2797	0.2997	0.253	0.1017		0.3193	0.3194	0.1299	0.2568	0.233	0.3603	0.258	0.3978	0.3356	0.6877	0.4179	0.2511
MAG	MAG(22:0)	Mol%		0.2459	0.3617	0.2428	0.3774	0.3392	0.1902	0.1312	0.1598		0.3238	0.124	0.2919	0.2933	0.4136	0.2202	0.3897	0.2787	0.5617		0.2511
MAG	MAG(22:1)	Mol%	2.2842	0.6541	1.3444	0.6149	0.9984	0.82	1.0518	0.3964	0.5189	1.4185	0.8995	0.7444	1.0938	0.8409	0.8304	0.5651	1.1367	0.965	1.5565	1.0166	0.5988
MAG	MAG(22:2)	Mol%	3.4418	1.1698	2.8763	1.4131	1.663	1.3422	2.0347	0.6866	1.1574	2.5145	2.3449	1.491	2.5129	1.2608	1.4442	1.2049	2.0103	1.8429	3.5619	1.9863	1.0585
MAG	MAG(22:4)	Mol%
MAG	MAG(22:5)	Mol%	0.5141	0.2798	0.5056	0.4126	0.3894	0.3116	0.3832	0.3274	0.3411	0.3182	0.3381	0.3854	0.5847	0.4684	0.6074	0.4612	0.3751	0.5226	0.5958	0.4744	0.3289
MAG	MAG(22:6)	Mol%	0.4179	0.2652	0.5832	0.5003	0.5157	0.4413	0.4129	0.2213	0.5736	0.6728	0.6807	0.4183	0.5487	0.544	0.4103	0.4555	0.341	0.497	0.7428	0.4986	0.5446
MAG	MAG(24:0)	Mol%	0.2542	0.1545	0.3976								0.3448			0.2921	0.3296	0.1266	0.2127	0.2427	0.3753	0.2146	0.2192
MAG	MAG(24:1)	Mol%	0.2198	0.2106	0.4166	0.2428		0.228	0.1441		0.1357	0.285		0.0997		0.1798	0.3393		0.3443	0.1904	0.3911		0.2617
PC	PC(12:0/16:1)	Mol%								0.0095		0.0102
PC	PC(12:0/18:1)	Mol%	0.1031	0.0803	0.1025	0.0886	0.0796	0.037	0.0627	0.066	0.0981	0.074	0.0627	0.038	0.0461	0.0632	0.0914	0.0767	0.0927	0.0643	0.0855	0.0673	0.0732
PC	PC(12:0/18:2)	Mol%	0.0141	0.0162	0.0249	0.0164	0.0111	0.0133	0.0174	0.0096	0.0251	0.014	0.0221	0.0152	0.0145		0.015	0.0168	0.0168	0.0119	0.0166	0.0152
PC	PC(14:0/16:1)	Mol%	0.0117	0.0116											0.0099				0.0103
PC	PC(14:0/18:1)	Mol%	0.0915	0.0631	0.0612	0.0592	0.0737	0.0701	0.0682	0.0746	0.0959	0.1127	0.0907	0.0791	0.0625	0.06	0.0564	0.0536	0.0706	0.0588	0.0557	0.07	0.0642
PC	PC(14:0/18:2)	Mol%	0.1348	0.1078	0.1238	0.1243	0.096	0.1207	0.1235	0.1369	0.2093	0.1585	0.1664	0.134	0.1221	0.1098	0.113	0.1258	0.1122	0.1042	0.0981	0.1184	0.0882
PC	PC(14:0/18:3)	Mol%
PC	PC(14:0/20:3)	Mol%	0.009
PC	PC(14:0/20:4)	Mol%	0.0263	0.0426	0.0269	0.0331	0.0319	0.0373	0.0225	0.0205	0.0352	0.0287	0.0352	0.0229	0.0175		0.0234	0.0281	0.0276	0.023	0.0269	0.0406	0.0301
PC	PC(14:0/22:4)	Mol%
PC	PC(14:0/22:5)	Mol%
PC	PC(14:0/22:6)	Mol%	0.0536		0.0461		0.0434	0.0656	0.0574	0.0377	0.0446	0.0438	0.0774	0.0508	0.0495	0.06	0.0561	0.0629	0.0513	0.0372	0.0554	0.0453	0.0628
PC	PC(15:0/14:1)	Mol%	0.0355	0.0464		0.0316	0.029		0.0425	0.0341			0.0378	0.0304	0.0236		0.0379	0.0384	0.0341	0.0304	0.0346
PC	PC(15:0/16:1)	Mol%
PC	PC(15:0/18:1)	Mol%	0.0279	0.0266	0.0302	0.0257	0.0209	0.0232	0.0279	0.0168	0.0287	0.0262	0.0191	0.0209	0.0205	0.0211	0.0255	0.0154	0.0256	0.0217	0.0169	0.0189	0.0186
PC	PC(15:0/18:2)	Mol%	0.0533	0.0518	0.0601	0.0419	0.0495	0.0605	0.0635	0.0462	0.061	0.065	0.0571	0.0612	0.0555	0.0629	0.0527	0.0442	0.0552	0.0544	0.0498	0.0474	0.0536
PC	PC(15:0/20:4)	Mol%	0.026	0.0345											0.0157	0.033	0.0316	0.0275	0.0321	0.0207		0.032
PC	PC(15:0/22:6)	Mol%	0.0451	0.0345	0.0453	0.0416	0.0466	0.0391	0.0397	0.0314		0.0391		0.027	0.0447		0.0494	0.0562	0.043	0.0438	0.0401	0.0445	0.0665
PC	PC(16:0/12:0)	Mol%	0.1741	0.1742	0.1944	0.1621	0.1298	0.0895	0.1661	0.1745	0.1463	0.1031	0.1395	0.0946	0.1183	0.1507	0.1557	0.167	0.155	0.1233	0.1757	0.1485	0.1625
PC	PC(16:0/14:0)	Mol%	0.0117				0.0093			0.0107	0.0124	0.0132	0.0125	0.011	0.0103	0.013	0.0102	0.009		0.0097		0.0128
PC	PC(16:0/16:0)	Mol%	0.3443	0.3978	0.3636	0.4598	0.4116	0.4879	0.4296	0.6058	0.6894	0.5039	0.532	0.5579	0.5582	0.5476	0.4036	0.4713	0.4666	0.4738	0.4541	0.4463	0.4804
PC	PC(16:0/16:1)	Mol%	0.5451	0.3369	0.2355	0.337	0.2954	0.3625	0.2447	0.4218	0.3639	0.5981	0.4136	0.41	0.404	0.2817	0.2875	0.2568	0.2811	0.2084	0.2138	0.3948	0.2341
PC	PC(16:0/18:0)	Mol%	0.55	0.4398	0.4366	0.4016	0.4415	0.5256	0.4959	0.5915	0.5622	0.417	0.5342	0.5371	0.4885	0.5444	0.571	0.4492	0.6161	0.5072	0.4449	0.4637	0.4511
PC	PC(16:0/18:1)	Mol%	11.6046	8.0533	7.5368	7.4858	8.5707	11.0192	10.3862	9.8092	9.5574	12.7163	9.3523	10.7218	10.2802	11.1844	9.0088	6.9639	8.8899	8.0428	7.0264	9.9316	7.1422
PC	PC(16:0/18:2)	Mol%	27.2278	29.5934	32.6061	30.9152	29.6048	37.7742	38.624	36.651	38.7176	37.1856	38.2653	37.888	39.5698	36.6346	32.2356	34.0384	30.0881	33.7623	33.7304	37.0467	33.1065
PC	PC(16:0/18:3)	Mol%	0.6463	0.5383	0.5158	0.5379	0.5137	0.5351	0.3948	0.5355	0.7336	0.5162	0.678	0.575	0.5421	0.5221	0.4993	0.521	0.5152	0.5195	0.4341	0.5068	0.4784
PC	PC(16:0/20:1)	Mol%	0.0307	0.0316	0.0386	0.0284	0.0404	0.027	0.0247	0.0221	0.0367	0.0391	0.0269	0.0256	0.0237	0.0308	0.0346	0.0291	0.0336	0.0292	0.0251	0.0303	0.0276
PC	PC(16:0/20:2)	Mol%	0.1523	0.1257	0.0893	0.1234	0.118	0.0556	0.0583	0.0583	0.0662	0.101	0.0436	0.0722	0.0663	0.085	0.1235	0.0747	0.1073	0.1211	0.103	0.0811	0.0975
PC	PC(16:0/20:3)	Mol%	1.9926	1.4819	1.4611	1.4859	1.7506	0.633	0.5847	0.6161	0.7828	1.1672	0.6939	0.7517	0.5766	0.7894	1.4842	0.8347	1.462	1.4256	1.06	1.0213	1.0533
PC	PC(16:0/20:4)	Mol%	8.2709	9.3271	7.8498	10.0523	10.0872	6.1417	5.9716	5.3896	5.7147	8.121	5.5776	6.5774	6.1165	6.1097	7.2999	8.5206	8.549	7.8079	7.9314	7.6452	8.8035
PC	PC(16:0/20:5)	Mol%	1.4068	1.287	1.0547	1.2306	1.194	0.6447	0.8346	1.0409	0.7351	0.5255	0.8117	0.7737	0.8049	0.7302	1.0394	1.2374	1.0813	0.8291	1.225	0.8404	0.9189
PC	PC(16:0/22:4)	Mol%	0.0546	0.0356	0.037	0.0347	0.0476	0.0396	0.0429	0.0465	0.0542	0.045	0.0398	0.0556	0.0471	0.0446	0.0357	0.0346	0.0487	0.0331	0.0391	0.0438	0.049
PC	PC(16:0/22:5)	Mol%	0.8668	0.7639	0.6226	0.7278	0.7079	0.701	0.7041	0.7889	0.5566	0.5348	0.6149	0.7821	0.7984	0.6721	0.7018	0.7332	0.6087	0.6314	0.6498	0.6989	0.6884
PC	PC(16:0/22:6)	Mol%	14.3512	12.9548	10.9879	12.5792	12.2436	12.557	11.4524	12.2307	9.9407	9.3733	11.4043	12.4136	11.9066	13.4231	12.3828	14.0813	11.6459	13.21	12.8205	11.5805	13.5302
PC	PC(17:0/14:1)	Mol%	0.0365	0.0448	0.0392	0.0505	0.0325	0.0332	0.0554	0.0469	0.0602	0.0328	0.0558	0.0378	0.045	0.0417	0.0486	0.0397	0.0408	0.0339	0.0436
PC	PC(17:0/16:1)	Mol%
PC	PC(17:0/18:1)	Mol%	0.0348	0.0462	0.0299	0.0327	0.0353	0.0286	0.0349	0.0251	0.0323	0.0366	0.0422	0.0217	0.0328	0.0239	0.0271	0.0234	0.0329	0.0241	0.03	0.0278	0.0276
PC	PC(17:0/18:2)	Mol%	0.1056	0.1525	0.168	0.1266	0.1245	0.1129	0.1278	0.1124	0.1594	0.1022	0.1371	0.113	0.1138	0.0937	0.1333	0.1211	0.1421	0.1305	0.1214	0.0906	0.1252
PC	PC(17:0/20:3)	Mol%	0.0334	0.032	0.0411		0.0266				0.0319			0.0203			0.0323	0.0272	0.0325	0.0273	0.0391
PC	PC(17:0/20:4)	Mol%	0.0888	0.0922	0.0992	0.0983	0.091	0.0576	0.0743	0.0652	0.088	0.111	0.0855	0.0838	0.0614	0.0668	0.0951	0.0783	0.0912	0.0857	0.0845	0.0632	0.1168
PC	PC(17:0/20:5)	Mol%	0.0187														0.0206		0.0233
PC	PC(17:0/22:5)	Mol%	0.0198
PC	PC(17:0/22:6)	Mol%	0.0762	0.0677	0.0765	0.0775	0.0683	0.0752	0.0948	0.068	0.0767	0.0624	0.0749	0.0617	0.068	0.0709	0.0864	0.0982	0.0734	0.0896	0.0845	0.0432	0.084
PC	PC(18:0/12:0)	Mol%	0.2394	0.2512	0.342	0.2128	0.2223	0.186	0.2797	0.2673	0.3288	0.1757	0.276	0.1718	0.214	0.2728	0.2781	0.2517	0.2648	0.222	0.2609	0.2398	0.2569
PC	PC(18:0/14:0)	Mol%
PC	PC(18:0/16:1)	Mol%	0.0711	0.0607	0.033	0.0477	0.0412	0.041	0.0367	0.0556	0.0448	0.0474	0.0482	0.0419	0.0456	0.0368	0.0483	0.0367	0.0563	0.0286	0.0298	0.0501	0.0347
PC	PC(18:0/18:0)	Mol%	0.1189	0.1402	0.1466	0.1478	0.14	0.1536	0.117	0.155	0.1623	0.125	0.1429	0.1346	0.1439	0.1503	0.1468	0.1248	0.1483	0.128	0.132	0.143	0.1637
PC	PC(18:0/18:1)	Mol%	1.2868	1.0412	1.1684	1.0069	1.1162	1.2468	1.1389	1.2441	0.953	0.8033	1.0683	1.052	1.1514	1.0842	1.2079	0.9141	1.2178	1.0249	1.0345	1.0176	0.9489
PC	PC(18:0/18:2)	Mol%	9.7124	10.699	13.4167	10.7342	10.5025	9.9661	9.7961	10.9146	9.1028	5.5074	9.5805	8.962	9.4024	8.9973	11.7118	10.4441	11.6947	11.3169	11.6995	8.742	10.5305
PC	PC(18:0/18:3)	Mol%	0.116	0.0902	0.117	0.0996	0.0905	0.0851	0.0646	0.076	0.0989	0.0561	0.0999	0.054	0.0666	0.072	0.0977	0.0728	0.1016	0.0955	0.0801	0.058	0.0822
PC	PC(18:0/20:0)	Mol%	0.0962	0.0907	0.0856	0.091	0.1098	0.0744	0.0778	0.0926	0.1003	0.1131	0.0961	0.0864	0.0866	0.0942	0.0957	0.0921	0.1049	0.0953	0.0898	0.0819	0.0945
PC	PC(18:0/20:1)	Mol%	0.0131		0.0224			0.015		0.0181	0.0168	0.0161		0.0132			0.0143	0.0149		0.0153	0.0169	0.0156
PC	PC(18:0/20:2)	Mol%	0.0562	0.0537	0.0495	0.0564	0.0449	0.0193	0.0268	0.0184	0.0278	0.0222	0.0221	0.0217	0.0203	0.0338	0.0527	0.0202	0.0453	0.0423	0.0395	0.0245	0.0439
PC	PC(18:0/20:3)	Mol%	0.7224	0.6755	0.6893	0.695	0.7585	0.2895	0.2992	0.3413	0.3292	0.3754	0.3359	0.3274	0.2988	0.3572	0.7464	0.3981	0.679	0.6101	0.4824	0.4198	0.5414
PC	PC(18:0/20:4)	Mol%	3.5359	4.9773	4.4401	5.0702	5.2752	3.3675	3.0957	3.0922	2.5612	2.9892	2.649	3.1446	3.1062	3.1958	4.1604	4.4994	4.787	3.7799	4.2789	3.5781	4.8035
PC	PC(18:0/20:5)	Mol%	0.4524	0.4863	0.4299	0.4928	0.4484	0.2377	0.297	0.3967	0.2197	0.1784	0.2966	0.2383	0.2718	0.2557	0.3859	0.4551	0.422	0.3152	0.4316	0.2494	0.4447
PC	PC(18:0/22:4)	Mol%	0.026	0.0231			0.0242		0.022	0.0269		0.0237		0.0282	0.0169			0.016	0.0269
PC	PC(18:0/22:5)	Mol%	0.2056	0.2169	0.1738	0.1809	0.2084	0.1988	0.2336	0.2539	0.1432	0.1197	0.1596	0.2055	0.215	0.1922	0.1851	0.2208	0.198	0.1877	0.1616	0.2019	0.1958
PC	PC(18:0/22:6)	Mol%	3.5714	3.1406	3.0742	2.9897	3.1321	3.3862	3.3855	3.8035	2.4208	1.7048	3.0708	3.0403	3.3075	3.1922	3.17	3.607	3.1762	3.2837	3.3048	2.8038	3.377
PC	PC(18:1/16:1)	Mol%	0.4823	0.3111	0.2335	0.2412	0.2537	0.3572	0.3178	0.4195	0.5342	0.9536	0.5217	0.4552	0.3397	0.3222	0.311	0.2151	0.3383	0.241	0.2189	0.3842	0.2324
PC	PC(18:1/18:1)	Mol%	0.3222	0.3434	0.2783	0.2728	0.2913	0.3563	0.3356	0.3293	0.5067	0.5591	0.414	0.3294	0.2857	0.308	0.3139	0.2335	0.3339	0.2808	0.2717	0.329	0.242
PC	PC(18:1/18:2)	Mol%	2.4401	3.0725	3.1451	2.902	2.8365	2.4158	2.8546	2.6639	4.2347	3.802	3.5928	2.5621	2.3867	2.518	2.9136	2.4577	3.2032	2.9767	3.0883	2.9191	2.7956
PC	PC(18:1/18:3)	Mol%	0.077	0.0748	0.0602	0.0528	0.0699	0.054	0.057	0.0553	0.1291	0.1147	0.0987	0.0637	0.0544	0.0645	0.0711	0.0512	0.0691	0.0522	0.0553	0.0584	0.0572
PC	PC(18:1/20:1)	Mol%	0.0157			0.0158	0.0167	0.0181				0.0189		0.0176		0.0179	0.0126		0.017		0.0108	0.0161
PC	PC(18:1/20:2)	Mol%	0.0257	0.0228	0.0215	0.0237	0.021		0.0193	0.0111	0.0202	0.0198		0.0162	0.01		0.021	0.0103	0.0175	0.0196	0.0118	0.0139
PC	PC(18:1/20:3)	Mol%	0.236	0.1854	0.1643	0.1996	0.2078	0.0623	0.0787	0.0685	0.0874	0.1533	0.0963	0.0863	0.0547	0.0882	0.1717	0.088	0.1914	0.1594	0.1387	0.1145	0.1361
PC	PC(18:1/20:4)	Mol%	0.8819	1.2278	1.0419	1.2969	1.4159	0.6183	0.7754	0.6529	0.8527	1.4425	0.818	0.7296	0.6197	0.8112	0.9052	0.9676	1.2146	0.9327	0.962	0.9453	1.0785
PC	PC(18:1/20:5)	Mol%	0.1688	0.1615	0.1254	0.1538	0.1351	0.0762	0.1011	0.1018	0.1072	0.1084	0.0904	0.096	0.0717	0.0824	0.1116	0.1258	0.1329	0.0877	0.1179	0.0851	0.1086
PC	PC(18:1/22:4)	Mol%
PC	PC(18:1/22:5)	Mol%	0.0719	0.0776	0.0478	0.0668	0.0519	0.042	0.0754	0.0566	0.0483	0.0658	0.0568	0.0651	0.0593	0.0626	0.0513	0.0646	0.0611	0.0527	0.0518	0.0744	0.0681
PC	PC(18:1/22:6)	Mol%	1.5049	1.3003	1.0785	1.1985	1.2344	0.9162	1.1326	0.9356	1.0613	1.2498	1.1037	0.9966	0.9014	1.2076	1.1885	1.1513	1.3241	1.3115	1.3015	1.1999	1.3444
PC	PC(18:2/16:1)	Mol%	0.847	0.8416	0.6851	0.7612	0.6984	0.8708	0.8817	1.1099	1.7227	2.2854	1.4366	1.1643	1.0146	0.7928	0.7913	0.7322	0.7021	0.666	0.6266	0.9492	0.6866
PC	PC(18:2/18:2)	Mol%	0.7044	1.0799	1.1279	0.9123	0.875	0.6498	0.9596	0.8491	1.7616	1.2244	1.3098	0.7595	0.7337	0.8516	0.9747	0.8999	1.035	0.9716	1.2185	0.991	1.0046
PC	PC(18:2/18:3)	Mol%	0.0957	0.1376	0.1405	0.113	0.1329	0.1355	0.1129	0.1639	0.3231	0.2645	0.2642	0.1531	0.1532	0.1219	0.1225	0.1325	0.1289	0.1096	0.1408	0.1623	0.1546
PC	PC(18:2/20:1)	Mol%	0.0602	0.0542	0.0582	0.0453	0.0384	0.0286	0.0361	0.0352	0.0281	0.0543	0.0373	0.0294	0.0246	0.0412	0.0551	0.0333	0.0635	0.0303	0.0337	0.0463	0.0378
PC	PC(18:2/20:2)	Mol%	0.0361	0.0344	0.0385	0.0345	0.0328	0.0243	0.0242	0.0222	0.0283	0.0367	0.0292	0.0225	0.0182	0.0245	0.0356	0.0279	0.0388	0.0345	0.0299	0.0321	0.0317
PC	PC(18:2/20:3)	Mol%	0.1398	0.1637	0.1325	0.1394	0.1322	0.0623	0.062	0.0679	0.1047	0.1066	0.0815	0.0705	0.049	0.0897	0.1376	0.0741	0.146	0.1123	0.1019	0.1193	0.1066
PC	PC(18:2/20:4)	Mol%	0.5591	0.7336	0.6165	0.6776	0.7146	0.3204	0.427	0.3798	0.4983	0.5993	0.4689	0.4114	0.3647	0.486	0.5612	0.5245	0.6871	0.5268	0.6426	0.5709	0.6716
PC	PC(18:2/20:5)	Mol%	0.1163	0.153	0.0906	0.1156	0.1055	0.0535	0.0918	0.0837	0.0948	0.0712	0.0992	0.0583	0.0665	0.0799	0.1152	0.1204	0.1028	0.0894	0.1252	0.1117	0.1133
PC	PC(18:2/22:4)	Mol%	0.0324	0.045	0.0401	0.0436	0.0352	0.0491	0.0258	0.0444	0.0362	0.0307	0.0532	0.0347	0.0303	0.0456	0.0402	0.0332	0.0289	0.0389	0.0426	0.0411	0.039
PC	PC(18:2/22:5)	Mol%	0.0488	0.0497	0.0567	0.0713	0.0596	0.0376	0.044	0.0597	0.0548	0.0639	0.0541	0.0394	0.0431	0.0453	0.0573	0.0573	0.0501	0.0421	0.0608	0.0549	0.0757
PC	PC(18:2/22:6)	Mol%	0.3917	0.4101	0.4065	0.3409	0.4069	0.2535	0.3666	0.3115	0.5166	0.5775	0.4746	0.2868	0.2314	0.402	0.3433	0.3667	0.4466	0.4062	0.4834	0.4208	0.4225
PC	PC(20:0/14:1)	Mol%	0.015	0.0177	0.0178	0.0197	0.0156	0.0222	0.0167	0.0224	0.0184	0.0185	0.0237	0.0177	0.0186	0.0191	0.0128	0.0174	0.0213	0.0127	0.0117	0.0224	0.0163
PC	PC(20:0/16:1)	Mol%	0.012							0.0099		0.0105					0.0071		0.0087
PC	PC(20:0/18:1)	Mol%	0.1567	0.0964	0.1205	0.0949	0.1282	0.1431	0.1511	0.1304	0.1213	0.1465	0.121	0.1265	0.1341	0.1469	0.1189	0.0967	0.1141	0.1033	0.0863	0.1262	0.0923
PC	PC(20:0/18:2)	Mol%	0.5727	0.5187	0.6272	0.5475	0.5103	0.5223	0.5728	0.5347	0.6317	0.5595	0.546	0.5366	0.5636	0.5925	0.601	0.5572	0.5704	0.5733	0.5472	0.5929	0.499
PC	PC(20:0/18:3)	Mol%	0.0113		0.0157		0.0116			0.0101	0.0148	0.0105	0.0171	0.0102			0.0137		0.0125		0.0126
PC	PC(20:0/20:3)	Mol%	0.026	0.0251	0.0364	0.0288	0.0296	0.0149		0.0122	0.017	0.0179				0.0205	0.0265	0.0185	0.0302	0.0263	0.0168	0.0155	0.0262
PC	PC(20:0/20:4)	Mol%	0.1804	0.1819	0.1829	0.1879	0.1924	0.1091	0.0943	0.1004	0.0914	0.1677	0.088	0.0995	0.1079	0.1351	0.1539	0.1494	0.1822	0.15	0.1554	0.1493	0.1677
PC	PC(20:0/20:5)	Mol%	0.0347	0.0361	0.0273		0.0294		0.0176	0.0242								0.028	0.0185	0.0232	0.0314	0.0263	0.0313
PC	PC(20:0/22:5)	Mol%															0.0178
PC	PC(20:0/22:6)	Mol%	0.2336	0.2058	0.1897	0.2077	0.1769	0.1519	0.1705	0.1834	0.1288	0.1318	0.153	0.1747	0.2016	0.2176	0.1725	0.2422	0.2297	0.228	0.1456	0.1851	0.2081
PE	PE(14:0/18:2)	Mol%										0.0093
PE	PE(14:0/22:6)	Mol%	0.0188
PE	PE(15:0/22:6)	Mol%	0.034	0.026	0.0373	0.0313	0.0338	0.0311	0.0283	0.0213	0.0224	0.0262	0.037	0.0413	0.0281	0.0323	0.0345	0.0281	0.0374	0.0217	0.0224	0.0245	0.0299
PE	PE(16:0/16:0)	Mol%	0.0025	0.0041		0.0045	0.0036	0.0037	0.0017	0.0031	0.0034	0.0039	0.0029	0.0041	0.003	0.0039	0.0023	0.0027	0.003	0.0031	0.0037	0.0035
PE	PE(16:0/16:1)	Mol%	0.0227	0.0175	0.0142	0.0239	0.016	0.0147	0.0091	0.0201	0.013	0.0322	0.0225	0.0185	0.0167	0.0145	0.0165	0.0103	0.0198	0.0136	0.01	0.0231	0.0115
PE	PE(16:0/18:1)	Mol%	0.2843	0.3079	0.246	0.2801	0.2486	0.3119	0.2127	0.2833	0.3024	0.5555	0.4232	0.4128	0.2691	0.3752	0.2697	0.1916	0.3042	0.2607	0.2469	0.295	0.267
PE	PE(16:0/18:2)	Mol%	2.98	3.5283	4.5673	3.7752	3.4034	4.1617	4.2142	4.5704	4.7904	5.4663	6.0184	5.5003	4.0217	4.9581	3.9987	3.3393	4.1717	3.3043	3.9331	4.4839	3.8202
PE	PE(16:0/18:3)	Mol%	0.0896	0.0569	0.0976	0.0884	0.0762	0.1223	0.0658	0.1771	0.1722	0.1982	0.3072	0.2028	0.1144	0.114	0.0718	0.0868	0.0842	0.0789	0.0873	0.1033	0.0824
PE	PE(16:0/20:1)	Mol%	0.037	0.0237	0.0261	0.0282	0.0244	0.0166	0.0189	0.0173	0.0206	0.0307	0.0126	0.0244	0.0127	0.0266	0.029	0.0161	0.0238	0.0252	0.0179	0.0231	0.0248
PE	PE(16:0/20:2)	Mol%	0.0394	0.0437	0.0389	0.0457	0.0412	0.0239	0.0223	0.0252	0.0387	0.0841	0.0268	0.0366	0.0242	0.0403	0.0505	0.0204	0.0325	0.0361	0.0272	0.0477	0.0497
PE	PE(16:0/20:3)	Mol%	0.3046	0.2592	0.2539	0.2814	0.2723	0.1627	0.1296	0.1291	0.1464	0.2245	0.1762	0.1716	0.1356	0.1736	0.2259	0.1329	0.2576	0.1979	0.2047	0.2162	0.1789
PE	PE(16:0/20:4)	Mol%	5.3914	5.013	4.924	5.4025	5.8892	4.8002	4.0838	4.3318	4.0434	5.0997	4.8846	3.9679	4.395	4.1288	5.0028	4.7787	5.4118	3.9858	4.7132	4.7251	4.7637
PE	PE(16:0/20:5)	Mol%	0.5897	0.4563	0.9095	0.66	0.5312	0.3484	0.4339	0.6393	0.3302	0.392	0.5081	0.4912	0.3937	0.4424	0.6585	0.5973	0.666	0.4113	0.6886	0.527	0.6078
PE	PE(16:0/22:4)	Mol%	0.0675	0.0462	0.0334	0.06	0.0519	0.0863	0.0592	0.0767	0.0494	0.0809	0.063	0.0711	0.0681	0.0547	0.0453	0.0447	0.0425	0.0322	0.0399	0.0525	0.0435
PE	PE(16:0/22:5)	Mol%	1.154	0.6871	0.5942	0.9668	0.6573	0.9107	0.7599	0.9661	0.8757	0.6366	0.8792	1.0984	0.9287	0.7877	0.692	0.7986	0.7033	0.7538	0.7284	0.7926	0.9694
PE	PE(16:0/22:6)	Mol%	26.955	22.3635	20.7811	23.1207	22.061	23.1409	26.1622	25.2331	19.5185	21.5059	20.5808	26.5801	25.0694	25.5925	21.5185	23.7123	21.6996	27.0904	22.2059	23.9672	23.8495
PE	PE(17:0/18:1)	Mol%	0.0095		0.0176			0.0156	0.0103		0.0191	0.0179	0.0172		0.015		0.0198		0.018
PE	PE(17:0/18:2)	Mol%	0.0548	0.0693	0.0879	0.0554	0.0665	0.0617	0.1044	0.0751	0.116	0.0885	0.1217	0.0792	0.0596	0.0655	0.0766	0.0599	0.0954	0.0627	0.0693	0.0554	0.0709
PE	PE(17:0/20:2)	Mol%	0.0129		0.0188				0.0108	0.0133	0.0163	0.0137	0.0192	0.0144	0.0115		0.0155	0.015	0.015	0.0105	0.0163	0.012	0.0184
PE	PE(17:0/20:3)	Mol%	0.012		0.0163	0.0168	0.0197		0.012		0.0164	0.0164	0.0199	0.0127	0.0142	0.0149	0.0186	0.0123	0.0162		0.0158		0.0163
PE	PE(17:0/20:4)	Mol%	0.1346	0.1212	0.1734	0.1362	0.1358	0.113	0.1505	0.0932	0.1615	0.1816	0.149	0.1675	0.1131	0.1205	0.1251	0.1416	0.1932	0.0946	0.1413	0.1166	0.1565
PE	PE(17:0/20:5)	Mol%	0.0144	0.0141	0.0192	0.012	0.0163	0.0143	0.0129		0.0141	0.0119	0.0265	0.0169		0.018	0.0203	0.0181	0.0129		0.0175	0.0181
PE	PE(17:0/22:5)	Mol%	0.0184	0.0217	0.017	0.0175	0.0181	0.0156	0.022	0.0177	0.0278	0.0156	0.0291	0.0217	0.02	0.019	0.0141	0.0127	0.0241	0.0128	0.023	0.0169	0.0161
PE	PE(17:0/22:6)	Mol%	0.1444	0.1407	0.1715	0.1295	0.1527	0.1445	0.1959	0.1478	0.2079	0.148	0.1835	0.1797	0.1545	0.1548	0.161	0.1654	0.1609	0.1244	0.1267	0.1427	0.1288
PE	PE(18:0/16:0)	Mol%	0.0088	0.0109	0.0075	0.0094	0.0111	0.0104	0.0058	0.0093	0.01	0.0155	0.0105	0.008	0.0086	0.0099	0.0092	0.0095	0.0123	0.0097	0.0078	0.0093	0.0107
PE	PE(18:0/16:1)	Mol%	0.0058	0.0112	0.009	0.0127	0.0107	0.01	0.0043	0.007		0.0078	0.0082	0.0112	0.0092	0.0075	0.0083	0.0064	0.0084	0.0062	0.0076	0.0079	0.0113
PE	PE(18:0/18:0)	Mol%	0.0167	0.0229	0.0161	0.0187	0.0171	0.0239	0.0138	0.0155	0.0169	0.0173	0.0196	0.021	0.0196	0.0222	0.0183	0.0157	0.0192	0.0186	0.0204	0.0201	0.02
PE	PE(18:0/18:1)	Mol%	0.3535	0.3806	0.3342	0.3867	0.361	0.4039	0.3025	0.3938	0.3167	0.394	0.3777	0.4587	0.4032	0.4186	0.3901	0.2914	0.372	0.3282	0.3186	0.3852	0.3371
PE	PE(18:0/18:2)	Mol%	3.9691	5.5137	6.7077	4.9749	4.6381	5.5027	4.5321	5.4701	6.0914	3.9856	6.1559	5.684	5.0784	5.4124	5.9213	4.9012	5.8535	4.8243	5.3117	5.3382	4.9226
PE	PE(18:0/18:3)	Mol%	0.074	0.0736	0.0826	0.0645	0.0735	0.0945	0.0443	0.104	0.1132	0.0713	0.1626	0.105	0.0676	0.0719	0.0756	0.069	0.0717	0.0681	0.0553	0.0618	0.0664
PE	PE(18:0/20:1)	Mol%	0.038	0.0382	0.0348	0.039	0.0311	0.0265	0.0149	0.0209	0.0199	0.0225	0.014	0.0386	0.0176	0.0294	0.042	0.0251	0.037	0.0334	0.0234	0.0347	0.0404
PE	PE(18:0/20:2)	Mol%	0.0489	0.058	0.0612	0.0521	0.0543	0.0265	0.0213	0.0254	0.0365	0.0479	0.0277	0.0391	0.0258	0.0411	0.0585	0.0344	0.0502	0.0416	0.0331	0.0444	0.0438
PE	PE(18:0/20:3)	Mol%	0.9774	0.9885	0.9942	1.0446	1.106	0.7345	0.6133	0.6265	0.6379	0.8625	0.7444	0.8569	0.6917	0.8085	0.9283	0.6231	0.997	0.8324	0.9221	0.8832	0.9155
PE	PE(18:0/20:4)	Mol%	23.6526	27.4661	25.3376	25.8255	28.252	28.2871	23.7979	22.5312	22.757	23.6127	24.8864	21.7196	24.641	23.7786	27.0191	26.155	26.4165	22.0476	26.4978	23.912	25.7237
PE	PE(18:0/20:5)	Mol%	2.0122	2.025	3.8911	2.5341	2.1222	1.436	1.9589	2.5225	1.5998	1.4782	2.1671	1.9448	1.6846	2.3852	3.2708	2.5947	3.1281	1.9852	3.1757	2.0377	2.5253
PE	PE(18:0/22:2)	Mol%								0.0056							0.0064					0.0084
PE	PE(18:0/22:4)	Mol%	0.1114	0.0983	0.0717	0.0997	0.1068	0.1892	0.1028	0.115	0.0976	0.11	0.1269	0.1112	0.1088	0.0944	0.1057	0.0848	0.0888	0.078	0.0782	0.1116	0.1118
PE	PE(18:0/22:5)	Mol%	0.7475	0.4788	0.4577	0.6647	0.5062	0.8268	0.6293	0.8046	0.8519	0.4423	0.6363	0.7842	0.7288	0.6004	0.569	0.6698	0.5634	0.6373	0.6055	0.6806	0.7398
PE	PE(18:0/22:6)	Mol%	15.4297	14.0121	14.2849	13.6493	13.4085	17.0763	18.3769	19.1567	17.3223	12.6301	14.0594	16.9113	18.5926	16.4291	14.8129	16.2007	13.718	18.1844	14.7208	16.9112	14.8076
PE	PE(18:1/16:1)	Mol%	0.0099	0.0143	0.0106	0.0091	0.007	0.0091	0.0043	0.0104	0.0168	0.0354	0.016	0.0135	0.0091	0.0103	0.0093	0.0068	0.0083	0.0039	0.0099	0.0079	0.0107
PE	PE(18:1/18:1)	Mol%	0.0528	0.0749	0.0577	0.062	0.0571	0.0555	0.0418	0.0558	0.1158	0.1742	0.1104	0.0723	0.0514	0.0647	0.0568	0.0419	0.0695	0.0586	0.0608	0.0603	0.0553
PE	PE(18:1/18:2)	Mol%	1.3313	1.9889	2.0534	1.8269	1.6874	1.2451	1.2908	1.3716	3.0054	2.8194	2.7468	1.5888	1.207	1.6071	1.7312	1.3373	1.9308	1.4941	1.647	1.6298	1.5351
PE	PE(18:1/18:3)	Mol%	0.0382	0.0337	0.0379	0.0338	0.0342	0.0318	0.0213	0.0409	0.0874	0.1019	0.0992	0.0419	0.0285	0.0247	0.0302	0.0261	0.0384	0.0362	0.0399	0.0372	0.0447
PE	PE(18:1/20:1)	Mol%	0.0169	0.019	0.0152	0.02	0.0142	0.013	0.0102	0.0139	0.0309	0.0518	0.0115	0.0217	0.0079	0.0192	0.0186	0.0112	0.0179	0.0197	0.0118	0.0165	0.0172
PE	PE(18:1/20:2)	Mol%	0.0185	0.026	0.0192	0.0175	0.0158	0.0121	0.0082	0.009	0.0354	0.0495	0.0225	0.0145	0.0127	0.0162	0.0182	0.0139	0.0173	0.0159	0.0162	0.0144	0.015
PE	PE(18:1/20:3)	Mol%	0.1854	0.2013	0.1761	0.2064	0.1958	0.0867	0.0732	0.0787	0.1261	0.2505	0.1495	0.1065	0.0856	0.1258	0.1607	0.0904	0.182	0.149	0.1499	0.1528	0.1317
PE	PE(18:1/20:4)	Mol%	2.9184	3.7575	3.1982	3.8763	4.1742	2.2454	2.1817	2.0131	2.9258	4.9014	2.9129	2.0676	2.2123	2.2222	3.0861	3.1679	3.4129	2.5952	3.013	2.8555	3.2971
PE	PE(18:1/20:5)	Mol%	0.3607	0.3419	0.5135	0.4403	0.418	0.1561	0.2443	0.2978	0.2705	0.3068	0.299	0.2285	0.1849	0.2753	0.4456	0.3748	0.4404	0.3194	0.4649	0.2587	0.375
PE	PE(18:1/22:0)	Mol%	0.0048		0.0044														0.0049
PE	PE(18:1/22:1)	Mol%
PE	PE(18:1/22:2)	Mol%
PE	PE(18:1/22:4)	Mol%	0.0188			0.0225	0.0253	0.033	0.0124	0.0249	0.042	0.0408	0.0239	0.0284	0.0207	0.0133	0.0122	0.0229	0.0144	0.0165	0.0189	0.0215	0.0234
PE	PE(18:1/22:5)	Mol%	0.1794	0.128	0.1166	0.1801	0.1211	0.1586	0.1271	0.152	0.2962	0.2112	0.1717	0.179	0.1367	0.1361	0.1173	0.1527	0.1366	0.1591	0.161	0.1723	0.2287
PE	PE(18:1/22:6)	Mol%	5.778	5.4952	4.7373	5.4334	5.5991	3.6683	5.6999	4.5681	6.7489	7.8144	5.0558	4.7063	4.9454	5.0613	4.8572	5.5926	4.7576	6.238	5.5451	5.4973	5.5061
PE	PE(18:2/16:1)	Mol%	0.0675	0.0837	0.0766	0.0788	0.0772	0.0579	0.053	0.081	0.1667	0.2836	0.1548	0.1093	0.068	0.0652	0.0728	0.057	0.0755	0.048	0.0578	0.0823	0.0673
PE	PE(18:2/18:2)	Mol%	0.1116	0.1711	0.2465	0.1475	0.14	0.1464	0.2048	0.1837	0.6983	0.4812	0.569	0.2049	0.1551	0.2127	0.1773	0.1482	0.217	0.1609	0.2388	0.2067	0.178
PE	PE(18:2/18:3)	Mol%	0.0146	0.0167	0.0271	0.0151	0.0148	0.0169	0.014	0.0351	0.0961	0.0927	0.1056	0.0235	0.0193	0.0212	0.0166	0.0215	0.0178	0.0132	0.0221	0.0272	0.0161
PE	PE(18:2/20:1)	Mol%	0.0187	0.0252	0.0277	0.0249	0.0218	0.0173	0.0179	0.0232	0.0505	0.0551	0.0392	0.0276	0.0165	0.019	0.027	0.0173	0.0301	0.0195	0.0185	0.0261	0.0221
PE	PE(18:2/20:2)	Mol%	0.0146	0.0174	0.0185	0.0121	0.0127	0.0162	0.0105	0.0137	0.0399	0.0393	0.0259	0.0163	0.0106	0.0126	0.0168	0.0091	0.0191	0.0117	0.0151	0.0154	0.0184
PE	PE(18:2/20:3)	Mol%	0.0341	0.0241	0.0444	0.0288	0.0297	0.0114	0.0186	0.0212	0.0515	0.0752	0.0375	0.0242	0.0176	0.0219	0.0261	0.0225	0.0332	0.0233	0.0281	0.0339	0.0277
PE	PE(18:2/20:4)	Mol%	0.2182	0.233	0.244	0.2232	0.2431	0.1342	0.1749	0.1348	0.3373	0.3813	0.3153	0.1309	0.1251	0.1719	0.2274	0.2015	0.289	0.1884	0.2517	0.2012	0.2318
PE	PE(18:2/20:5)	Mol%	0.0208	0.0225	0.0563	0.0555	0.0325		0.0207		0.0323	0.0273	0.0457	0.0378		0.0343	0.0463	0.0339	0.0409	0.0244	0.0453	0.0367	0.0486
PE	PE(18:2/22:1)	Mol%	0.0031		0.0055							0.0049			0.0054				0.0046
PE	PE(18:2/22:2)	Mol%
PE	PE(18:2/22:4)	Mol%							0.0108		0.0182	0.0158
PE	PE(18:2/22:5)	Mol%	0.0164	0.0143	0.0166		0.0174	0.0222	0.0288	0.0346	0.1202	0.0405	0.0392	0.0258	0.0201	0.0225	0.0126	0.0203	0.0163	0.0226	0.0257	0.0191	0.0313
PE	PE(18:2/22:6)	Mol%	0.3461	0.3992	0.4724	0.338	0.3253	0.2667	0.534	0.3715	1.1649	0.7437	0.5978	0.3597	0.3277	0.336	0.327	0.4085	0.401	0.414	0.4698	0.449	0.4038
PE	PE(O16:0/16:0)	Mol%															0.0053
PE	PE(O16:0/18:1)	Mol%										0.0039					0.0043	0.0037
PE	PE(O16:0/18:2)	Mol%	0.0115	0.0168	0.0222	0.0176	0.0154	0.0217	0.0133	0.017	0.025	0.0187	0.0213	0.0124	0.0161	0.0114	0.0166	0.0187	0.0173	0.0116	0.0151	0.0127	0.0162
PE	PE(O16:0/20:1)	Mol%						0.0104		0.008								0.0063
PE	PE(O16:0/20:3)	Mol%
PE	PE(O16:0/20:4)	Mol%	0.0194		0.0189	0.0192	0.0193	0.0236	0.0095	0.0177		0.0181		0.014	0.018			0.0231	0.0159	0.0125		0.0177	0.0203
PE	PE(O16:0/22:4)	Mol%
PE	PE(O16:0/22:5)	Mol%	0.0104											0.0133
PE	PE(O16:0/22:6)	Mol%	0.1073	0.0931	0.0634	0.0875	0.0776	0.0739	0.0938	0.067	0.0722	0.0589	0.0643	0.0901	0.0799	0.0808	0.0987	0.0786	0.0856	0.1028	0.0947	0.1028	0.0965
PE	PE(O18:0/16:0)	Mol%												0.0052	0.0042			0.0058
PE	PE(O18:0/16:1)	Mol%
PE	PE(O18:0/18:0)	Mol%	0.004				0.0034			0.0052				0.0045			0.0041		0.0049		0.0061
PE	PE(O18:0/18:1)	Mol%	0.0101	0.0171	0.0146	0.0142	0.0128	0.0172	0.009	0.013	0.0128	0.013	0.0156	0.0121	0.0113	0.014	0.0141	0.0129	0.0167	0.0089	0.0098	0.0069	0.0133
PE	PE(O18:0/18:2)	Mol%	0.1272	0.1653	0.2209	0.1586	0.1379	0.1904	0.1759	0.1481	0.2463	0.1662	0.2379	0.1494	0.1342	0.1668	0.1916	0.1593	0.2076	0.1357	0.162	0.1418	0.1669
PE	PE(O18:0/18:3)	Mol%									0.0091	0.0069
PE	PE(O18:0/20:1)	Mol%	0.0026		0.0047			0.0231		0.0123								0.0121
PE	PE(O18:0/20:2)	Mol%
PE	PE(O18:0/20:3)	Mol%	0.0153	0.0168	0.0161	0.0191	0.0191	0.0122	0.0105	0.0098	0.0129	0.0151	0.0143	0.0169	0.0131	0.014	0.0162	0.0129	0.0196	0.0152	0.016	0.0131	0.0125
PE	PE(O18:0/20:4)	Mol%	0.341	0.3888	0.3919	0.3599	0.3857	0.3078	0.3083	0.2651	0.3863	0.3599	0.3938	0.2883	0.3404	0.3016	0.3705	0.358	0.4054	0.2733	0.3724	0.2797	0.342
PE	PE(O18:0/20:5)	Mol%	0.0354	0.0345	0.0639	0.0481	0.0435		0.0309	0.0399	0.0309	0.0331	0.0518	0.0418	0.0323	0.0406	0.0527	0.0319	0.0535	0.0282	0.0464	0.0281	0.0423
PE	PE(O18:0/22:4)	Mol%
PE	PE(O18:0/22:5)	Mol%	0.0257	0.0182	0.0222	0.032	0.0221	0.0211	0.018	0.0186	0.0302	0.0194	0.023	0.0243	0.0244	0.0224	0.0127	0.0272	0.0211	0.0197	0.0215	0.0204	0.0318
PE	PE(O18:0/22:6)	Mol%	0.49	0.4612	0.4301	0.443	0.413	0.3918	0.5161	0.4072	0.5455	0.4602	0.4991	0.4111	0.4752	0.4401	0.4502	0.4718	0.4594	0.5412	0.4291	0.3932	0.4205
PE	PE(P14:0/18:0)	Mol%															0.0047	0.0061
PE	PE(P16:0/16:0)	Mol%	0.005	0.0077	0.0064	0.012	0.0081	0.0101	0.0059	0.0053		0.007	0.0068	0.007	0.0062		0.0078	0.0065		0.0044	0.0058	0.0085	0.0102
PE	PE(P16:0/18:0)	Mol%																	0.0046		0.0048
PE	PE(P16:0/18:1)	Mol%	0.0052	0.0083	0.008	0.01	0.0053	0.0106	0.0042	0.0068	0.0119	0.0069	0.0085		0.0198			0.0051	0.0042		0.0088	0.0059	0.0065
PE	PE(P16:0/18:2)	Mol%	0.0194	0.0335	0.0356	0.0299	0.0217	0.0287	0.0157	0.0151	0.0281	0.019	0.0309	0.0153	0.0329	0.0233	0.0215	0.023	0.0316	0.0192	0.0304	0.0243	0.034
PE	PE(P16:0/20:1)	Mol%		0.0104				0.0076							0.0041			0.0061	0.0054		0.0078
PE	PE(P16:0/20:3)	Mol%	0.0044				0.0122				0.0075	0.0072		0.0081	0.0093					0.0062	0.0083
PE	PE(P16:0/20:4)	Mol%	0.0669	0.0796	0.0704	0.129	0.1025	0.1558	0.0577	0.0797	0.1392	0.1412	0.1032	0.0968	0.146	0.1026	0.0624	0.0833	0.0815	0.0704	0.09	0.0769	0.0925
PE	PE(P16:0/20:5)	Mol%									0.0146		0.0276		0.0177
PE	PE(P16:0/22:4)	Mol%	0.0179	0.0239		0.0307	0.032	0.0469	0.0108	0.0206	0.0311	0.0298	0.0191	0.0299	0.0312	0.019	0.0146	0.022	0.0171	0.0213	0.0262	0.0197
PE	PE(P16:0/22:5)	Mol%	0.0288	0.0301	0.0208	0.0404	0.0293	0.0428	0.0143	0.0209	0.0697	0.031	0.0327	0.035	0.0375	0.0339	0.0169	0.026	0.0241	0.0307	0.0388	0.0246	0.0411
PE	PE(P16:0/22:6)	Mol%	0.2231	0.2234	0.2794	0.2155	0.177	0.205	0.1832	0.1459	0.2527	0.2263	0.2263	0.185	0.1902	0.2393	0.1678	0.1919	0.2009	0.2643	0.2601	0.2136	0.2075
PE	PE(P16:1/18:1)	Mol%															0.0036
PE	PE(P18:0/16:0)	Mol%	0.0051				0.0076		0.0038	0.0051		0.005	0.006	0.005	0.0042	0.0057					0.0033
PE	PE(P18:0/16:1)	Mol%
PE	PE(P18:0/18:0)	Mol%															0.004
PE	PE(P18:0/18:1)	Mol%	0.0086	0.0107	0.0084	0.0104	0.0066	0.0089	0.0064	0.0075	0.0117	0.012	0.0147	0.0081	0.0133	0.0079	0.0052	0.0059	0.0098	0.0058	0.0093	0.0085	0.0077
PE	PE(P18:0/18:2)	Mol%	0.0515	0.0888	0.0863	0.0583	0.0537	0.056	0.0446	0.0336	0.071	0.0703	0.0791	0.0376	0.0477	0.0565	0.0691	0.0652	0.076	0.0501	0.0819	0.0617	0.0592
PE	PE(P18:0/18:3)	Mol%
PE	PE(P18:0/20:1)	Mol%		0.0091	0.0062			0.0087										0.007	0.0054		0.0067	0.005
PE	PE(P18:0/20:2)	Mol%
PE	PE(P18:0/20:3)	Mol%	0.0064	0.0088		0.0098	0.009	0.0119			0.008	0.0077		0.0073	0.0108			0.0044	0.0075		0.007
PE	PE(P18:0/20:4)	Mol%	0.1122	0.1258	0.0961	0.1195	0.1401	0.1817	0.0742	0.0763	0.1297	0.1555	0.1612	0.1147	0.1445	0.1128	0.0867	0.107	0.0945	0.0948	0.1052	0.0959	0.1107
PE	PE(P18:0/20:5)	Mol%	0.0124			0.0223													0.0411
PE	PE(P18:0/22:4)	Mol%	0.0179	0.0174	0.0147	0.0192	0.0224	0.0292	0.0143	0.0149	0.0187	0.0204		0.0213	0.0241			0.0171	0.0136	0.0145	0.0139		0.0211
PE	PE(P18:0/22:5)	Mol%	0.0361	0.0297	0.022	0.0309	0.0321	0.0344	0.0152	0.0196	0.0375	0.0229	0.0351	0.0321	0.0249	0.0287	0.02	0.019	0.03	0.0284	0.0298	0.0214	0.0305
PE	PE(P18:0/22:6)	Mol%	0.4534	0.4829	0.4119	0.3426	0.3595	0.331	0.2823	0.23	0.3688	0.3484	0.3277	0.3012	0.3038	0.3704	0.376	0.4105	0.4194	0.4474	0.4751	0.3644	0.3994
PE	PE(P18:1/16:0)	Mol%	0.0038				0.0038															0.0048
PE	PE(P18:1/18:1)	Mol%			0.0065	0.0074	0.0062	0.0079	0.0046	0.0045	0.0054				0.006		0.0064	0.0046	0.0085	0.0055	0.0076		0.0077
PE	PE(P18:1/18:2)	Mol%	0.0384	0.0451	0.0523	0.0514	0.032	0.0309	0.0417	0.0331	0.0382	0.0346	0.0361	0.0274	0.0251	0.0406	0.0376	0.0363	0.0371	0.0409	0.0584	0.0329	0.0421
PE	PE(P18:1/20:3)	Mol%
PE	PE(P18:1/20:4)	Mol%	0.0228	0.0328	0.0246	0.0249	0.0395	0.0496	0.017	0.0253	0.0371	0.0495	0.0422	0.0275	0.0428	0.0368	0.0153	0.0315	0.0266	0.0246	0.0282	0.021	0.0328
PE	PE(P18:1/20:5)	Mol%
PE	PE(P18:1/22:4)	Mol%						0.0211				0.0167		0.017	0.0145						0.0116
PE	PE(P18:1/22:5)	Mol%	0.0111			0.0145	0.0107		0.0065		0.0193	0.0105		0.0166	0.01	0.0136		0.0063			0.0172	0.0128
PE	PE(P18:1/22:6)	Mol%	0.0536	0.0538	0.0707	0.0577	0.0575	0.0756	0.0708	0.0427	0.075	0.0697	0.0673	0.0878	0.0707	0.077	0.0475	0.0491	0.0496	0.0758	0.0628	0.0672	0.0684
PE	PE(P18:2/18:2)	Mol%
PE	PE(P18:2/20:4)	Mol%
PI	PI(16:0/16:0)	Mol%		0.0651						0.1208			0.1288	0.0941		0.1198		0.0699			0.0726
PI	PI(16:0/16:1)	Mol%
PI	PI(16:0/18:1)	Mol%	0.15	0.1639	0.1046	0.1634	0.1333	0.1744	0.11	0.1983	0.1108	0.3088	0.2083	0.2602	0.1812	0.1152	0.1121	0.0898	0.1193	0.133	0.0848	0.1613	0.2009
PI	PI(16:0/18:2)	Mol%	1.9153	2.3092	1.8033	1.9099	1.6128	2.063	1.7593	2.4065	2.333	3.4786	2.1812	3.8965	2.383	2.0088	1.7417	1.7333	1.4613	2.237	1.9411	2.1288	2.1183
PI	PI(16:0/20:3)	Mol%	1.5019	0.923	0.8725	0.7934	0.8091	0.4484	0.4996	0.4893	0.529	0.7539	0.4844	0.6927	0.5747	0.7391	0.7983	0.4549	0.912	1.149	0.7133	0.9255	0.7266
PI	PI(16:0/20:4)	Mol%	8.0041	4.9039	4.9115	5.5753	4.9116	5.436	7.1418	5.6174	6.7972	7.6186	4.4996	6.3222	5.8611	5.6796	5.1742	6.0402	6.8415	5.6788	5.9441	7.0476	5.9934
PI	PI(16:0/22:4)	Mol%	0.1378
PI	PI(16:0/22:5)	Mol%	0.2218		0.1633	0.184	0.1145			0.1206				0.1623			0.1963	0.1238			0.1581	0.1625
PI	PI(16:0/22:6)	Mol%	0.8548	0.6537	0.496	0.4374	0.638		0.7241	0.7788		0.7296		0.428	0.5564	0.8545	0.5166	0.5426	0.4742	0.6786	0.5691	0.7489	0.589
PI	PI(18:0/16:0)	Mol%	0.2816	0.3678	0.2543	0.4332	0.3226	0.4498	0.3968	0.4479	0.3849	0.4696	0.4022	0.3913	0.4465	0.3595	0.2399	0.2894	0.2872	0.4676	0.3257	0.3196	0.396
PI	PI(18:0/16:1)	Mol%
PI	PI(18:0/18:1)	Mol%	0.0868	0.1528	0.1185	0.1449	0.0738	0.1198	0.0959	0.115	0.1384	0.2297	0.1345	0.1126	0.1308		0.1179		0.0849	0.1003	0.1029	0.0725
PI	PI(18:0/18:2)	Mol%	1.7041	3.1473	2.3548	2.7493	2.2957	2.3378	1.741	2.8181	4.0289	4.8605	4.2637	3.9014	2.6333	1.901	2.084	1.8712	1.4243	2.0601	1.615	1.4306	1.9586
PI	PI(18:0/18:3)	Mol%	0.0872	0.122
PI	PI(18:0/20:2)	Mol%	0.1764	0.2393	0.2617	0.2531	0.1987	0.1919	0.1491	0.1439	0.1578	0.1643	0.2671	0.1562	0.1394		0.2966	0.1549	0.1548	0.2262	0.1738	0.2516	0.2037
PI	PI(18:0/20:3)	Mol%	6.0094	5.5384	5.3007	5.6973	5.7836	3.2987	3.155	3.2531	3.0366	3.7021	4.3289	4.6661	3.698	4.1941	4.9709	2.6591	4.1847	5.7446	4.3848	4.1607	4.2661
PI	PI(18:0/20:4)	Mol%	69.1411	71.9029	74.0323	72.5122	74.3597	80.0568	76.4609	75.575	71.3272	62.3173	74.0906	71.3911	76.2948	76.0434	74.1744	78.1256	74.4824	73.1841	74.5869	74.3061	74.8585
PI	PI(18:0/20:5)	Mol%	1.4525	0.9766	1.9002	1.3307	1.2316	1.3057	1.3449	2.518	1.4866	1.031	1.9744	2.2084	1.2758	1.1763	1.9749	1.3543	1.3539	1.0814	1.4805	0.679	1.1099
PI	PI(18:0/22:4)	Mol%	0.2942	0.3552	0.2579	0.26	0.4067	0.2008	0.2966	0.2717	0.2672	0.2632	0.2992	0.2324	0.2943	0.3408	0.3124	0.3813	0.2406	0.274	0.2431	0.2678	0.4048
PI	PI(18:0/22:5)	Mol%	0.395	0.2912	0.2866	0.5199	0.309	0.3334	0.2424	0.3431	0.5351	0.2216	0.3649	0.3541	0.3663	0.3814	0.376	0.3122	0.2444	0.3417	0.4485	0.3157	0.3555
PI	PI(18:0/22:6)	Mol%	1.9294	1.626	1.581	1.6814	1.6537	0.6281	1.9748	1.4819	1.3134	1.3282	1.0998	1.4923	1.6164	1.8459	1.538	1.2293	1.2216	1.9085	1.4937	1.183	1.7592
PI	PI(18:1/16:1)	Mol%	0.1232	0.1517	0.0782	0.1554	0.0946	0.0982	0.0917	0.0968	0.206	0.3496	0.1493	0.1177	0.1168	0.1119	0.1044	0.0555	0.1084	0.1358	0.1314	0.1325	0.1726
PI	PI(18:1/18:1)	Mol%	0.1743	0.3058	0.1795	0.1792	0.199	0.1699	0.0986	0.1728	0.2936	0.559	0.2587	0.1863	0.1288	0.1798	0.2087	0.1548	0.2216	0.2146	0.2587	0.2369	0.2104
PI	PI(18:1/18:2)	Mol%	0.867	1.7532	1.2492	1.0228	0.935	0.7905	0.6272	0.81	1.6538	2.6089	1.4403	0.8984	0.698	0.7888	0.9976	0.9648	1.1105	1.1332	1.2919	1.0362	1.1409
PI	PI(18:1/20:3)	Mol%	0.5422	0.4094	0.4315	0.3915	0.4019		0.1556	0.138	0.2118	0.6096	0.2222	0.1482	0.1344	0.2643	0.3789	0.1604	0.457	0.3427	0.3417	0.3793	0.2383
PI	PI(18:1/20:4)	Mol%	3.8036	3.2797	3.0333	3.3198	3.2958	1.7092	2.8352	1.9048	4.6363	7.7486	2.8828	1.6834	2.3042	2.6667	3.4111	2.9649	4.3305	2.6701	3.2758	3.765	3.0325
PI	PI(18:2/18:2)	Mol%	0.1464	0.362	0.3291	0.2859	0.2192	0.1874	0.0997	0.1783	0.5526	0.6472	0.3192	0.204	0.1659	0.2292	0.275	0.2677	0.2849	0.2386	0.3626	0.289	0.2647
SM	SM(14:0)	Mol%	0.1036	0.1088	0.1007	0.0934	0.1048	0.1447	0.0727	0.1638	0.1952	0.1245	0.1784	0.1105	0.1426	0.0992	0.0857	0.1369	0.0993	0.0934	0.1277	0.0999	0.132
SM	SM(16:0)	Mol%	9.0795	9.95	9.9666	10.6496	10.184	15.6971	11.8711	15.5217	13.9625	11.2769	15.0938	12.811	17.6918	13.2425	9.1599	14.4395	12.4275	12.4794	14.6463	11.6073	12.8309
SM	SM(18:0)	Mol%	0.5131	0.7506	0.6264	0.8261	0.8353	3.0463	1.1068	3.0819	2.1589	0.7964	3.178	1.5394	2.3015	1.3531	0.5462	1.2436	0.7746	0.9915	1.3647	0.6683	0.9768
SM	SM(18:1)	Mol%	0.0269	0.0374	0.0332	0.0435	0.0419	0.0705	0.0465	0.0706	0.1023	0.0556	0.1094	0.0537	0.0645	0.0429	0.0345	0.0521	0.0394	0.0349	0.0464	0.0367	0.0361
SM	SM(20:0)	Mol%	10.2952	9.6047	10.2061	9.6518	9.8578	14.2519	13.6765	15.7921	12.8745	13.2487	14.6728	15.0524	15.1616	13.0847	11.8058	12.9671	9.6816	10.8661	11.2261	14.0923	10.588
SM	SM(20:1)	Mol%	0.327	0.3317	0.2926	0.2884	0.3323	0.4098	0.3275	0.5122	0.5634	0.6857	0.6026	0.4952	0.4477	0.315	0.3508	0.3581	0.2626	0.2714	0.2853	0.3894	0.2665
SM	SM(22:0)	Mol%	34.4312	35.2677	36.0084	32.7728	32.939	31.338	33.7502	30.3244	32.6132	29.4813	29.4142	32.5127	29.0465	34.4803	35.5609	31.5455	33.0673	34.6304	33.1801	32.975	33.0874
SM	SM(22:1)	Mol%	4.1385	4.7149	4.261	4.545	4.497	3.8204	3.5538	4.553	4.8023	6.4136	5.2915	4.7633	3.9217	3.4397	4.1316	3.8124	4.0361	3.4814	3.7382	4.0363	3.8382
SM	SM(24:0)	Mol%	20.2971	17.1005	17.1859	17.1315	17.1453	13.5347	17.6111	13.5227	15.7815	16.118	13.5785	14.0188	13.6919	17.081	17.7159	14.3673	18.8552	17.9909	16.0488	17.6668	16.5995
SM	SM(24:1)	Mol%	20.5004	21.8621	21.0066	23.7233	23.7899	17.4302	17.7722	16.2353	16.6844	21.5555	17.6373	18.4414	17.3279	16.574	20.3172	20.7986	20.4929	18.9424	19.0834	18.1611	21.3584
SM	SM(26:0)	Mol%	0.1246	0.1359	0.144	0.1123	0.1331	0.1201	0.108	0.0993	0.1191	0.1266	0.1074	0.0919	0.0931	0.1418	0.1337	0.1292	0.1189	0.111	0.1105	0.1354	0.1134
SM	SM(26:1)	Mol%	0.1628	0.1356	0.1685	0.1622	0.1396	0.1362	0.1037	0.123	0.1426	0.1172	0.1362	0.1097	0.1092	0.1459	0.1581	0.1497	0.1447	0.1073	0.1426	0.1315	0.1727
TAG	TAG36:0FA12:0	Mol%	0.0025	0.0061	0.003	0.0016	0.0013	0.0003	0.001	0.0006	0.0008	0.0005	0.0003	0.0002	0.0003	0.0009	0.0033	0.0007	0.003	0.0014	0.001	0.0008	0.0006
TAG	TAG38:0FA12:0	Mol%	0.0033	0.0054	0.0023	0.0016	0.0016	0.0005	0.0011	0.0005	0.0008	0.0007	0.0004	0.0003	0.0003	0.001	0.0037	0.001	0.0041	0.0015	0.0011	0.0008	0.0007
TAG	TAG40:0FA12:0	Mol%		0.0022	0.0023	0.0008	0.0007			0.0004	0.0004		0.0002		0.0002	0.0011	0.0018	0.0005	0.0025	0.0008	0.0008	0.0004	0.0004
TAG	TAG40:0FA14:0	Mol%	0.0024	0.0026	0.0021	0.0014	0.001	0.0004	0.001	0.0005	0.0007	0.0007	0.0003	0.0003	0.0003	0.0013	0.003	0.0006	0.0037	0.0016	0.001	0.0005	0.0007
TAG	TAG40:0FA16:0	Mol%		0.0031	0.0023	0.001	0.0011	0.0004	0.0008	0.0005	0.0006	0.0005	0.0004	0.0003	0.0003	0.001	0.0023	0.0006	0.0022		0.0011	0.0005	0.0008
TAG	TAG42:0FA12:0	Mol%		0.0017						0.0004	0.0005	0.0004	0.0004	0.0002	0.0003	0.0014	0.0015	0.0004				0.0004
TAG	TAG42:0FA14:0	Mol%		0.0016	0.0022			0.0004	0.0008	0.0005	0.0007	0.0006	0.0005	0.0003	0.0003	0.0031		0.0005	0.0023		0.0008	0.0003	0.0004
TAG	TAG42:0FA16:0	Mol%	0.003	0.0057	0.004	0.0018	0.0018	0.0012	0.0013	0.0011	0.0017	0.0012	0.0014	0.0011	0.0011	0.0027	0.0037	0.0011	0.005	0.002	0.0019	0.0012	0.0012
TAG	TAG42:1FA12:0	Mol%		0.001			0.0006	0.0003	0.0006	0.0003	0.0009	0.0004	0.0004	0.0002	0.0003	0.0012		0.0004			0.0007		0.0003
TAG	TAG42:1FA14:0	Mol%				0.0006		0.0004		0.0004	0.0006	0.0006	0.0005	0.0003	0.0003	0.0016						0.0003
TAG	TAG42:1FA16:0	Mol%	0.002	0.0023	0.0025	0.0013	0.0012	0.0014	0.0014	0.0015	0.0018	0.0013	0.0014	0.0012	0.0012	0.0018	0.0023	0.0011	0.0028	0.0012	0.0013	0.0008	0.0009
TAG	TAG42:1FA16:1	Mol%	0.0033	0.0024	0.0055	0.0018	0.0015	0.0006	0.0009	0.0008	0.001	0.0012	0.0008	0.0006	0.0006	0.0026	0.0037	0.0008	0.005	0.0018	0.0016	0.0008	0.001
TAG	TAG42:1FA18:1	Mol%	0.0227	0.0126	0.0283	0.0102	0.0086	0.0026	0.0102	0.0044	0.0074	0.0073	0.0044	0.0039	0.0037	0.0134	0.0238	0.0049	0.0386	0.014	0.0121	0.0041	0.0068
TAG	TAG42:2FA12:0	Mol%		0.0009			0.0008	0.0002	0.0005	0.0003	0.0009	0.0004	0.0005	0.0003	0.0003	0.0005	0.0013	0.0003	0.0023				0.0004
TAG	TAG42:2FA18:2	Mol%	0.0019	0.002	0.0035	0.0013	0.0014	0.001	0.0017	0.0021	0.0029	0.0016	0.0016	0.0013	0.0015	0.0017	0.0027	0.001	0.0047	0.0016	0.0016	0.0008	0.0011
TAG	TAG44:0FA12:0	Mol%	0.0024	0.0022	0.0023	0.0009	0.001	0.001	0.0011	0.0012	0.0018	0.0009	0.0012	0.0007	0.0009	0.002	0.0018	0.0008	0.0036	0.0015	0.0012	0.0006	0.0006
TAG	TAG44:0FA14:0	Mol%	0.0019	0.002		0.0015	0.0007	0.0011	0.0011	0.0012	0.0021	0.0019	0.0019	0.0011	0.0011	0.0075		0.0008		0.0008	0.0012	0.0007	0.0007
TAG	TAG44:0FA16:0	Mol%	0.0027	0.0046	0.0037	0.0013	0.0019	0.0028	0.0025	0.0031	0.0048	0.0026	0.0041	0.0026	0.0032	0.0079	0.0035	0.0018	0.0036	0.0018	0.0026	0.0015	0.0015
TAG	TAG44:0FA18:0	Mol%	0.0652	0.0448	0.0981	0.0361	0.0271	0.0118	0.0187	0.0143	0.0136	0.0162	0.0113	0.0076	0.0067	0.0274	0.1085	0.018	0.1397	0.0416	0.0311	0.0167	0.0172
TAG	TAG44:1FA12:0	Mol%	0.0015	0.0009	0.0019	0.0009	0.0007	0.0016	0.0012	0.0017	0.0038	0.0018	0.0028	0.0012	0.0016	0.0017	0.0015	0.0006	0.0023		0.001	0.0007	0.0006
TAG	TAG44:1FA14:0	Mol%	0.0014		0.0017		0.0007	0.0014	0.0013	0.0016	0.0035	0.0023	0.0027	0.0011	0.0013	0.0053		0.0006	0.0024		0.0011	0.0006	0.0004
TAG	TAG44:1FA14:1	Mol%		0.0012	0.0018		0.0007	0.0004	0.0007	0.0005	0.0008	0.0005	0.0006	0.0004	0.0005	0.0019	0.0012	0.0004	0.0024	0.001	0.0006	0.0003	0.0005
TAG	TAG44:1FA16:0	Mol%	0.0047	0.0046	0.0054	0.0044	0.0037	0.0068	0.005	0.0063	0.0079	0.005	0.0069	0.0065	0.006	0.0062	0.0056	0.0038	0.0048	0.0033	0.0041	0.004	0.0031
TAG	TAG44:1FA16:1	Mol%	0.0029	0.0017	0.0028	0.001	0.0011	0.0012	0.0011	0.0013	0.0022	0.0023	0.0021	0.0011	0.0014	0.0056	0.003	0.0008	0.0045	0.0015	0.0012	0.0008	0.0006
TAG	TAG44:1FA18:1	Mol%	0.0084	0.0067	0.0091	0.0058	0.0053	0.0043	0.005	0.0043	0.0061	0.0043	0.0047	0.004	0.0037	0.0056	0.0092	0.0032	0.0124	0.0048	0.0051	0.0028	0.0031
TAG	TAG44:2FA12:0	Mol%		0.0006		0.0008	0.0007	0.0014	0.0013	0.0021	0.005	0.0017	0.0034	0.0013	0.0018	0.0012	0.001	0.0009			0.0006	0.0007	0.0005
TAG	TAG44:2FA14:0	Mol%	0.0015			0.0006	0.0009	0.0015	0.0021	0.0022	0.0055	0.0018	0.0034	0.0011	0.0017	0.0018	0.0013	0.0008	0.0021	0.0007	0.001	0.0006	0.0005
TAG	TAG44:2FA16:0	Mol%	0.0056	0.0048	0.0073	0.0053	0.0053	0.0099	0.0074	0.0108	0.0113	0.0056	0.0101	0.0086	0.01	0.0071	0.0059	0.0053	0.0071	0.0037	0.0058	0.0051	0.0044
TAG	TAG44:2FA16:1	Mol%	0.0016	0.0016	0.0026	0.0011	0.001	0.0014	0.001	0.0014	0.0023	0.0021	0.0018	0.0013	0.0012	0.0028	0.0022	0.0008	0.0037	0.0013	0.0012	0.0009	0.0008
TAG	TAG44:2FA18:1	Mol%	0.0107	0.0062	0.0118	0.005	0.0052	0.0032	0.0052	0.0034	0.0043	0.0033	0.0027	0.0028	0.0027	0.0055	0.0099	0.0028	0.0142	0.0073	0.0048	0.0021	0.0027
TAG	TAG44:2FA18:2	Mol%	0.0133	0.0081	0.0214	0.0088	0.0074	0.0087	0.0105	0.01	0.0139	0.0081	0.0105	0.0088	0.0087	0.0095	0.0167	0.0067	0.0199	0.0075	0.0105	0.0057	0.0055
TAG	TAG44:3FA18:2	Mol%	0.0022	0.002	0.0029	0.0014	0.0013	0.0033	0.0033	0.0042	0.0062	0.0024	0.0045	0.0031	0.0038	0.0027	0.0028	0.0019	0.0029	0.0017	0.0017	0.0016	0.0014
TAG	TAG45:0FA14:0	Mol%		0.0009				0.0003		0.0003	0.0004	0.0007	0.0004	0.0003	0.0002	0.0055						0.0003	0.0003
TAG	TAG45:0FA15:0	Mol%	0.0015	0.0011		0.0006		0.0004	0.0005	0.0004	0.0006	0.0009	0.0005	0.0003	0.0002	0.0062		0.0004			0.0009	0.0004	0.0003
TAG	TAG45:0FA16:0	Mol%	0.0042	0.0024	0.0039	0.0022	0.002	0.0015	0.0013	0.001	0.0013	0.0022	0.0014	0.0014	0.0013	0.0082	0.0031	0.0011	0.0045	0.0024	0.004	0.0013	0.0012
TAG	TAG45:1FA15:0	Mol%	0.0018	0.0012	0.002	0.0008	0.0007	0.0004	0.0007	0.0004	0.0007	0.0008	0.0006	0.0005	0.0005	0.0042	0.0013		0.0023	0.0009	0.001	0.0003	0.0004
TAG	TAG45:1FA16:0	Mol%	0.0062	0.0054	0.0077	0.0058	0.0051	0.0054	0.0026	0.0026	0.0033	0.0036	0.0041	0.0044	0.0034	0.0063	0.0054	0.0033	0.0055	0.0041	0.0053	0.0031	0.0034
TAG	TAG45:1FA18:1	Mol%	0.0048	0.0034	0.0049	0.0037	0.0037	0.0031	0.0016	0.0017	0.0024	0.0022	0.0026	0.0029	0.0021	0.0032	0.003	0.0021	0.0052	0.0027	0.0038	0.0024	0.002
TAG	TAG46:0FA12:0	Mol%	0.0014	0.001	0.0017			0.0011	0.0011	0.0012	0.0018	0.0011	0.0015	0.0008	0.0008	0.0013		0.0005				0.0006
TAG	TAG46:0FA14:0	Mol%	0.0049	0.0051	0.0028	0.0029	0.0026	0.0054	0.0034	0.0057	0.0073	0.0057	0.0084	0.0049	0.0052	0.0103	0.0036	0.0025	0.0051	0.0024	0.0031	0.0036	0.0025
TAG	TAG46:0FA16:0	Mol%	0.0092	0.0101	0.0069	0.0073	0.0067	0.0141	0.0092	0.0141	0.0166	0.0151	0.0199	0.0127	0.0134	0.0205	0.0065	0.0078	0.0092	0.0072	0.0079	0.009	0.0069
TAG	TAG46:0FA18:0	Mol%		0.0024	0.0024	0.0008	0.0007	0.0007	0.0013	0.0006	0.0012	0.0009	0.0008	0.0006	0.0006	0.0015	0.002	0.0007	0.0028	0.0009	0.001	0.0004	0.0006
TAG	TAG46:1FA12:0	Mol%	0.0081	0.0049	0.0057	0.0036	0.004	0.0109	0.0123	0.0137	0.02	0.0105	0.0187	0.0101	0.0122	0.0082	0.0047	0.0057	0.0065	0.0048	0.0045	0.0055	0.0036
TAG	TAG46:1FA14:0	Mol%	0.0071	0.0037	0.0026	0.0035	0.0026	0.0081	0.0046	0.0092	0.0159	0.0146	0.0173	0.0082	0.0079	0.0098	0.003	0.0035	0.0046	0.0027	0.0028	0.0045	0.0023
TAG	TAG46:1FA14:1	Mol%	0.0056	0.0029	0.0054	0.0024	0.0024	0.002	0.0028	0.0023	0.0029	0.0024	0.0026	0.0017	0.0018	0.0037	0.0052	0.0018	0.0072	0.0034	0.0024	0.0015	0.0011
TAG	TAG46:1FA16:0	Mol%	0.0111	0.0093	0.008	0.0092	0.0089	0.0237	0.0208	0.0274	0.0359	0.0262	0.0365	0.0216	0.0272	0.0227	0.008	0.0135	0.0099	0.0074	0.009	0.0136	0.0091
TAG	TAG46:1FA16:1	Mol%	0.0047	0.0031	0.0037	0.0028	0.0029	0.0053	0.0023	0.0063	0.0074	0.0101	0.0094	0.0056	0.0061	0.014	0.0024	0.0025	0.003	0.0022	0.0021	0.004	0.002
TAG	TAG46:1FA18:0	Mol%	0.0016	0.001	0.0017		0.0009	0.0005	0.0007	0.0005	0.0009	0.0005	0.0006	0.0005	0.0004	0.001	0.002	0.0005	0.0024	0.0011	0.0008	0.0004	0.0005
TAG	TAG46:1FA18:1	Mol%	0.006	0.0049	0.0053	0.0038	0.0038	0.0129	0.0112	0.0143	0.0207	0.0118	0.0177	0.0108	0.0127	0.0096	0.005	0.0061	0.0067	0.0048	0.0061	0.0058	0.0046
TAG	TAG46:2FA12:0	Mol%	0.0104	0.0092	0.011	0.0086	0.0073	0.0231	0.0291	0.0333	0.0492	0.021	0.0426	0.022	0.0298	0.0162	0.0105	0.0145	0.014	0.0094	0.0113	0.0123	0.0093
TAG	TAG46:2FA14:0	Mol%	0.0042	0.0022	0.0025	0.0023	0.002	0.0092	0.0054	0.0099	0.0233	0.0152	0.0202	0.0079	0.0093	0.0071	0.0027	0.0038	0.0035	0.0026	0.0022	0.0045	0.0028
TAG	TAG46:2FA14:1	Mol%	0.0022	0.0012	0.0028	0.0014	0.001	0.0024	0.0022	0.0028	0.0048	0.0041	0.0042	0.0025	0.0026	0.0032	0.0019	0.0012	0.0034	0.0014	0.0013	0.0016	0.0007
TAG	TAG46:2FA16:0	Mol%	0.007	0.0095	0.009	0.0097	0.0097	0.0341	0.0394	0.0461	0.0638	0.0287	0.0582	0.0326	0.0431	0.0223	0.0121	0.0217	0.0118	0.0092	0.0141	0.0182	0.0136
TAG	TAG46:2FA16:1	Mol%	0.0051	0.0027	0.0037	0.0028	0.0028	0.0058	0.0042	0.0068	0.0116	0.0123	0.0101	0.0053	0.0058	0.0106	0.0031	0.0026	0.0041	0.0016	0.0022	0.0039	0.0022
TAG	TAG46:2FA18:1	Mol%	0.0041	0.0046	0.0062	0.0048	0.0043	0.0088	0.0062	0.0085	0.0154	0.0091	0.0109	0.0074	0.0071	0.0061	0.0054	0.0052	0.0069	0.0031	0.0047	0.005	0.0035
TAG	TAG46:2FA18:2	Mol%	0.0133	0.0104	0.024	0.011	0.0099	0.0272	0.0303	0.0385	0.0579	0.0254	0.0509	0.0272	0.0339	0.0211	0.0171	0.0185	0.023	0.0122	0.0171	0.0154	0.0117
TAG	TAG46:3FA12:0	Mol%	0.002	0.0018	0.0019	0.0012	0.0012	0.0048	0.0042	0.0063	0.013	0.0061	0.0099	0.0049	0.0055	0.0029	0.0024	0.0025	0.0025	0.0012	0.0021	0.0025	0.0017
TAG	TAG46:3FA14:0	Mol%		0.0011		0.0008		0.0017	0.0014	0.0022	0.0053	0.0025	0.0037	0.0015	0.0017	0.0013		0.0006		0.0008	0.0008	0.001	0.0006
TAG	TAG46:3FA14:1	Mol%	0.0012	0.0011	0.0019	0.0011	0.0009	0.0024	0.0015	0.0028	0.0069	0.003	0.0044	0.0017	0.002	0.0022	0.0017	0.0009	0.002	0.0012	0.001	0.001	0.0007
TAG	TAG46:3FA16:0	Mol%	0.0029	0.0048	0.0055	0.0043	0.004	0.0104	0.0098	0.0131	0.0141	0.0064	0.013	0.009	0.0123	0.0074	0.0061	0.0099	0.0041	0.0037	0.0047	0.0063	0.0052
TAG	TAG46:3FA16:1	Mol%	0.0022	0.002	0.0021	0.0013	0.0018	0.0063	0.0048	0.0088	0.0185	0.0087	0.0125	0.0064	0.0073	0.005	0.0016	0.0032	0.0034	0.0022	0.0019	0.0031	0.0019
TAG	TAG46:3FA18:1	Mol%	0.0059	0.005	0.0087	0.0038	0.0032	0.0058	0.0043	0.0049	0.0116	0.0046	0.006	0.0046	0.0045	0.005	0.0058	0.0034	0.0088	0.0037	0.0055	0.003	0.0025
TAG	TAG46:3FA18:2	Mol%	0.0063	0.0062	0.0119	0.0067	0.0061	0.0151	0.0137	0.0189	0.0308	0.0134	0.0213	0.0123	0.0162	0.0101	0.0083	0.0105	0.0117	0.0057	0.0074	0.0086	0.0066
TAG	TAG46:3FA18:3	Mol%	0.0018	0.0011	0.0021		0.0008	0.0014	0.0011	0.0018	0.0024	0.0011	0.0024	0.0015	0.0017	0.0011	0.0017	0.001		0.0011	0.0011	0.0006	0.0006
TAG	TAG46:4FA18:2	Mol%	0.0049	0.0034	0.0071	0.0039	0.0034	0.0067	0.0052	0.0078	0.0156	0.0051	0.0093	0.0055	0.0061	0.0052	0.0045	0.0045	0.0077	0.0045	0.0059	0.0036	0.0031
TAG	TAG47:0FA14:0	Mol%						0.0002	0.0005	0.0003	0.0004	0.0006	0.0005	0.0003	0.0003	0.0024		0.0004				0.0002	0.0003
TAG	TAG47:0FA15:0	Mol%	0.0044	0.0025	0.0047	0.0019	0.0022	0.0011	0.0016	0.0011	0.0013	0.0021	0.0016	0.0012	0.0012	0.0063	0.0039	0.0012	0.0068	0.0025	0.0019	0.0012	0.0013
TAG	TAG47:0FA16:0	Mol%	0.0065	0.0054	0.0064	0.0028	0.0028	0.0025	0.0031	0.0023	0.0033	0.0035	0.0027	0.0026	0.0026	0.0121	0.0056	0.0021	0.0071	0.0041	0.0036	0.0021	0.0025
TAG	TAG47:0FA17:0	Mol%	0.0064	0.0047	0.0087	0.0035	0.0036	0.0006	0.0025	0.0006	0.0012	0.0023	0.0007	0.0007	0.0007	0.0041	0.0054	0.0014	0.01	0.0037	0.0026	0.0009	0.0018
TAG	TAG47:1FA14:0	Mol%	0.0015	0.001		0.0008	0.0008	0.001	0.0008	0.0011	0.002	0.002	0.0023	0.0011	0.0009	0.003		0.0006	0.0023	0.001	0.0009	0.0007	0.0007
TAG	TAG47:1FA15:0	Mol%	0.0023	0.0019	0.0022	0.0016	0.0013	0.0017	0.0014	0.0014	0.0027	0.0033	0.0029	0.0018	0.0017	0.0067	0.0014	0.0011	0.0028	0.0012	0.0013	0.0013	0.0009
TAG	TAG47:1FA16:0	Mol%	0.004	0.0031	0.0041	0.0026	0.0024	0.0033	0.0033	0.0032	0.0052	0.0046	0.006	0.0037	0.0033	0.0089	0.0038	0.002	0.0051	0.0023	0.0025	0.0024	0.0022
TAG	TAG47:1FA16:1	Mol%	0.0238	0.0077	0.0183	0.0075	0.0063	0.0033	0.0045	0.0022	0.0039	0.008	0.0034	0.0047	0.0031	0.014	0.0138	0.0031	0.0204	0.0057	0.0071	0.0025	0.0029
TAG	TAG47:1FA17:0	Mol%	0.0044	0.0019	0.004	0.0017	0.0018	0.0006	0.0012	0.0005	0.0011	0.0012	0.0008	0.0006	0.0005	0.0026	0.0028	0.0009	0.0056	0.0017	0.0015	0.0005	0.001
TAG	TAG47:1FA18:1	Mol%	0.0034	0.003	0.0038	0.0023	0.0026	0.0027	0.0028	0.0023	0.004	0.0033	0.0042	0.0024	0.0021	0.0046	0.0045	0.0017	0.0048	0.0019	0.0042	0.0017	0.0015
TAG	TAG47:2FA14:0	Mol%	0.0017	0.0012		0.0008	0.0008	0.0015	0.0013	0.0018	0.0031	0.0027	0.0033	0.0015	0.0017	0.002	0.0017	0.0009		0.001	0.0012	0.001	0.0008
TAG	TAG47:2FA15:0	Mol%	0.002	0.0011	0.0019	0.0008	0.0011	0.0018	0.0017	0.002	0.0041	0.0029	0.0043	0.0018	0.0019	0.0028	0.0016	0.0008		0.0012	0.0015	0.0011	0.0008
TAG	TAG47:2FA16:1	Mol%	0.003	0.0011	0.0025	0.0014	0.0011	0.0009	0.0011	0.001	0.0023	0.0035	0.0022	0.0012	0.001	0.0079	0.002	0.0006	0.0044	0.0011	0.0013	0.0009	0.0007
TAG	TAG47:2FA18:1	Mol%	0.0077	0.0049	0.0065	0.0032	0.0039	0.0036	0.0035	0.0022	0.0046	0.004	0.0041	0.0031	0.0023	0.0032	0.0049	0.0024	0.0074	0.0034	0.0045	0.0023	0.0027
TAG	TAG47:2FA18:2	Mol%	0.0036	0.0027	0.0045	0.0025	0.0022	0.0043	0.0053	0.0047	0.0095	0.0057	0.0087	0.0042	0.0046	0.0051	0.004	0.0026	0.0046	0.0026	0.0033	0.0026	0.0022
TAG	TAG48:0FA14:0	Mol%	0.0048	0.0044	0.0022	0.0023	0.0027	0.0057	0.0045	0.0058	0.0085	0.0074	0.0088	0.0056	0.0049	0.0046	0.003	0.0029	0.0046	0.0027	0.0026	0.0031	0.0025
TAG	TAG48:0FA16:0	Mol%	0.0587	0.0626	0.0451	0.0467	0.0415	0.0716	0.0539	0.0734	0.0773	0.0689	0.0882	0.0748	0.0716	0.0731	0.0443	0.0541	0.0555	0.0592	0.0562	0.0591	0.0522
TAG	TAG48:0FA18:0	Mol%	0.0035	0.0037	0.0027	0.0019	0.0018	0.0029	0.0025	0.0026	0.0034	0.003	0.0036	0.0025	0.0023	0.0031	0.0021	0.0015	0.0035	0.0017	0.002	0.0019	0.0016
TAG	TAG48:1FA12:0	Mol%		0.0012		0.001	0.0011	0.0011	0.0016	0.0011	0.0025	0.001	0.0015	0.0011	0.0009	0.0012		0.0007			0.0008	0.0006	0.0005
TAG	TAG48:1FA14:0	Mol%	0.0432	0.0315	0.0209	0.0241	0.0242	0.0639	0.0462	0.0675	0.0902	0.0807	0.0975	0.0622	0.0608	0.0371	0.0242	0.0305	0.0258	0.0248	0.0242	0.041	0.0256
TAG	TAG48:1FA14:1	Mol%		0.0011		0.0009	0.0008	0.0017	0.0019	0.002	0.0026	0.0016	0.0023	0.0017	0.0017	0.0017	0.0017	0.0007		0.0008	0.0008	0.001	0.0008
TAG	TAG48:1FA16:0	Mol%	0.1177	0.0915	0.0587	0.0739	0.0725	0.1383	0.0828	0.1443	0.1695	0.1905	0.21	0.1438	0.1401	0.0863	0.0628	0.0752	0.0659	0.0578	0.0586	0.1108	0.0664
TAG	TAG48:1FA16:1	Mol%	0.0363	0.03	0.0172	0.0243	0.02	0.0318	0.0147	0.0346	0.0354	0.0513	0.0499	0.0364	0.0356	0.0279	0.0181	0.0203	0.0227	0.0157	0.0148	0.0293	0.0182
TAG	TAG48:1FA18:0	Mol%	0.0025	0.0021	0.0029	0.0013	0.0013	0.0024	0.0025	0.0025	0.0041	0.0022	0.0035	0.0024	0.0021	0.0028	0.0018	0.0012		0.0012	0.0016	0.0013	0.001
TAG	TAG48:1FA18:1	Mol%	0.0524	0.0365	0.023	0.0302	0.0278	0.0682	0.0409	0.0653	0.0795	0.0736	0.09	0.0605	0.061	0.041	0.0256	0.0328	0.0345	0.0284	0.028	0.0435	0.0283
TAG	TAG48:2FA12:0	Mol%	0.0048	0.0049	0.0054	0.0041	0.0038	0.0097	0.0102	0.0103	0.0194	0.0076	0.0124	0.0074	0.0084	0.0068	0.0042	0.006	0.0057	0.0043	0.0058	0.0053	0.0044
TAG	TAG48:2FA14:0	Mol%	0.0616	0.0517	0.0413	0.0468	0.0465	0.1318	0.097	0.1589	0.2241	0.1789	0.2465	0.1268	0.1461	0.0733	0.0431	0.0663	0.0478	0.0511	0.0549	0.0861	0.0544
TAG	TAG48:2FA14:1	Mol%	0.0079	0.0071	0.0075	0.0061	0.0055	0.0215	0.0211	0.0231	0.0314	0.022	0.029	0.0174	0.0227	0.0123	0.009	0.0097	0.0083	0.0055	0.0054	0.0116	0.0056
TAG	TAG48:2FA16:0	Mol%	0.0851	0.0734	0.0518	0.066	0.0644	0.1733	0.1156	0.2026	0.2769	0.229	0.3027	0.171	0.1882	0.0978	0.0589	0.0903	0.0632	0.0654	0.0696	0.117	0.0749
TAG	TAG48:2FA16:1	Mol%	0.0586	0.0341	0.0166	0.0301	0.0288	0.0452	0.0167	0.0515	0.0678	0.1173	0.0858	0.0523	0.0504	0.0292	0.0219	0.0232	0.022	0.0143	0.0132	0.0403	0.0169
TAG	TAG48:2FA18:0	Mol%	0.0018	0.0016	0.0032	0.0013	0.0013	0.0029	0.0034	0.003	0.0061	0.0019	0.0038	0.0023	0.0022	0.0025	0.0022	0.0014	0.0025	0.0016	0.002	0.0013	0.0012
TAG	TAG48:2FA18:1	Mol%	0.0302	0.0201	0.0158	0.0218	0.0198	0.0515	0.0367	0.0499	0.08	0.0617	0.0695	0.0437	0.0457	0.0274	0.0186	0.0249	0.018	0.0166	0.0184	0.0305	0.0186
TAG	TAG48:2FA18:2	Mol%	0.0595	0.0539	0.0391	0.0457	0.0463	0.1263	0.0906	0.1515	0.192	0.1442	0.2166	0.1245	0.1324	0.0722	0.043	0.0701	0.0469	0.0535	0.0542	0.082	0.0601
TAG	TAG48:3FA12:0	Mol%	0.0044	0.0047	0.0061	0.0074	0.007	0.0243	0.0212	0.0249	0.0482	0.0147	0.0293	0.0177	0.0207	0.013	0.0072	0.0132	0.0066	0.0086	0.0115	0.0123	0.0101
TAG	TAG48:3FA14:0	Mol%	0.0196	0.0142	0.0089	0.0129	0.0127	0.0332	0.0167	0.0407	0.0707	0.0632	0.0719	0.0339	0.0348	0.0144	0.0107	0.0164	0.0114	0.0098	0.009	0.0212	0.0115
TAG	TAG48:3FA14:1	Mol%	0.0109	0.0118	0.0137	0.0111	0.0114	0.0424	0.0484	0.0571	0.0816	0.0459	0.0671	0.0385	0.0489	0.0278	0.0158	0.0219	0.0163	0.0118	0.0117	0.025	0.0133
TAG	TAG48:3FA16:0	Mol%	0.0116	0.0117	0.0119	0.0109	0.0121	0.0406	0.0347	0.0499	0.0685	0.0416	0.0651	0.0377	0.0482	0.0218	0.0135	0.022	0.013	0.011	0.0107	0.0251	0.0144
TAG	TAG48:3FA16:1	Mol%	0.0279	0.0204	0.0118	0.018	0.018	0.0392	0.0197	0.049	0.0907	0.0962	0.0914	0.0449	0.0424	0.0214	0.0142	0.0185	0.016	0.0107	0.0113	0.0276	0.0144
TAG	TAG48:3FA18:1	Mol%	0.0093	0.0113	0.0096	0.011	0.0109	0.0388	0.033	0.0423	0.087	0.0306	0.0567	0.0305	0.0353	0.0247	0.0137	0.022	0.0105	0.0139	0.017	0.0199	0.0156
TAG	TAG48:3FA18:2	Mol%	0.0262	0.0276	0.0233	0.0283	0.0262	0.0827	0.0636	0.0963	0.1539	0.0931	0.1341	0.0712	0.0843	0.0436	0.0295	0.0465	0.0243	0.0251	0.0309	0.0493	0.0316
TAG	TAG48:3FA18:3	Mol%	0.0044	0.003	0.0037	0.0029	0.0031	0.0069	0.0025	0.0075	0.0087	0.0057	0.0109	0.0058	0.0072	0.0033	0.0029	0.0031	0.0039	0.0037	0.0026	0.0043	0.003
TAG	TAG48:4FA12:0	Mol%	0.0044	0.0043	0.0054	0.0057	0.0047	0.0162	0.016	0.0189	0.0378	0.009	0.0213	0.0117	0.0168	0.0108	0.0059	0.0115	0.0074	0.0074	0.0093	0.0092	0.0083
TAG	TAG48:4FA14:0	Mol%	0.003	0.0019		0.0016	0.0014	0.0047	0.0028	0.0059	0.0135	0.0062	0.0111	0.0047	0.005	0.0024	0.0017	0.0023	0.002	0.0018	0.0017	0.003	0.0018
TAG	TAG48:4FA14:1	Mol%	0.0023	0.0025	0.0025	0.0021	0.0014	0.0068	0.0057	0.0095	0.0195	0.0117	0.0144	0.0066	0.008	0.0034	0.0025	0.0033	0.0024	0.0018	0.0019	0.004	0.0022
TAG	TAG48:4FA16:0	Mol%	0.0031	0.0029	0.0042	0.0024	0.0025	0.0092	0.0118	0.0133	0.019	0.0087	0.0159	0.0085	0.0117	0.0061	0.0038	0.005	0.005	0.0029	0.0031	0.0047	0.0031
TAG	TAG48:4FA16:1	Mol%	0.0034	0.0027	0.003	0.0027	0.0025	0.0069	0.0047	0.0099	0.0196	0.0136	0.0158	0.0073	0.0085	0.0041	0.003	0.0033	0.0032	0.0019	0.0017	0.0047	0.0022
TAG	TAG48:4FA18:1	Mol%	0.003	0.0037	0.0065	0.0031	0.003	0.0076	0.0063	0.0086	0.017	0.0065	0.0097	0.0055	0.0069	0.0056	0.0049	0.0047	0.0076	0.0041	0.0039	0.004	0.0043
TAG	TAG48:4FA18:2	Mol%	0.0122	0.0154	0.0247	0.0178	0.017	0.0498	0.0488	0.0595	0.1213	0.0356	0.075	0.0393	0.0549	0.0337	0.0211	0.0351	0.0225	0.0221	0.0286	0.0289	0.0246
TAG	TAG48:4FA18:3	Mol%	0.0041	0.0021	0.0029	0.0019	0.0024	0.0055	0.003	0.0065	0.0108	0.0057	0.0098	0.0047	0.0067	0.0025	0.0028	0.0029	0.003	0.0023	0.0025	0.0038	0.0023
TAG	TAG48:4FA20:4	Mol%	0.0028	0.0015	0.0038	0.0015	0.0012	0.001	0.0022	0.0012	0.0015	0.0012	0.0012	0.0013	0.0011	0.0013	0.0027	0.0007	0.005	0.0013	0.0015	0.0008	0.0007
TAG	TAG48:5FA18:2	Mol%	0.0035	0.0031	0.0052	0.0029	0.0029	0.0085	0.0061	0.0114	0.0237	0.0065	0.014	0.0069	0.0092	0.0049	0.0053	0.0072	0.0051	0.0049	0.0047	0.005	0.0046
TAG	TAG48:5FA18:3	Mol%	0.0027	0.0019	0.0037	0.0016	0.0021	0.0038	0.0027	0.005	0.0092	0.0031	0.0073	0.0034	0.0048	0.0026	0.003	0.0031	0.0038	0.002	0.0026	0.0026	0.0019
TAG	TAG49:0FA15:0	Mol%	0.0027	0.0023	0.002	0.002	0.0016	0.0014	0.0013	0.0015	0.0017	0.002	0.0015	0.0014	0.0014	0.0026	0.0024	0.0009	0.0038	0.0018	0.0015	0.001	0.0013
TAG	TAG49:0FA16:0	Mol%	0.0126	0.0094	0.0106	0.0062	0.006	0.0045	0.005	0.0051	0.0061	0.0057	0.0058	0.0048	0.0047	0.0096	0.01	0.0041	0.0168	0.0072	0.0061	0.0038	0.0055
TAG	TAG49:0FA17:0	Mol%	0.0041	0.0038	0.0039	0.0023	0.0021	0.0016	0.0021	0.0016	0.0019	0.0019	0.0021	0.0017	0.0016	0.005	0.0033	0.0014	0.006	0.0028	0.0024	0.0012	0.0018
TAG	TAG49:0FA18:0	Mol%	0.0047	0.0026	0.0047	0.0019	0.0018	0.0009	0.0011	0.0006	0.0009	0.0011	0.0008	0.0008	0.001	0.0026	0.0035	0.0009	0.0066	0.0024	0.002	0.0006	0.0012
TAG	TAG49:1FA14:0	Mol%	0.0017	0.0014	0.0017	0.0009	0.0008	0.0013	0.0013	0.0011	0.0018	0.0017	0.0017	0.0009	0.001	0.0016	0.0018	0.0006		0.0009	0.0009	0.0006	0.0006
TAG	TAG49:1FA15:0	Mol%	0.0189	0.0132	0.0139	0.0101	0.0099	0.0149	0.0116	0.0128	0.0174	0.0205	0.0198	0.0153	0.0142	0.0146	0.0136	0.0097	0.0152	0.0112	0.0112	0.0115	0.0107
TAG	TAG49:1FA16:0	Mol%	0.036	0.0235	0.0219	0.0174	0.0183	0.0231	0.018	0.021	0.0253	0.0304	0.0304	0.0234	0.0218	0.024	0.0253	0.0159	0.0268	0.0168	0.0151	0.0182	0.0177
TAG	TAG49:1FA16:1	Mol%	0.0055	0.0038	0.0052	0.0027	0.0024	0.002	0.0017	0.0016	0.0024	0.0034	0.0026	0.002	0.0021	0.0065	0.0035	0.0013	0.0053	0.0022	0.0026	0.0017	0.0016
TAG	TAG49:1FA17:0	Mol%	0.0039	0.0024	0.0024	0.0019	0.002	0.0026	0.0019	0.0022	0.0032	0.0037	0.0036	0.0022	0.0022	0.0049	0.0034	0.0015	0.003	0.0022	0.0019	0.0014	0.0016
TAG	TAG49:1FA18:1	Mol%	0.0283	0.0173	0.0195	0.0134	0.0128	0.0155	0.0126	0.012	0.0172	0.0169	0.0174	0.014	0.0137	0.0154	0.0179	0.0096	0.0225	0.0129	0.0115	0.0115	0.0121
TAG	TAG49:2FA14:0	Mol%	0.0037	0.0021	0.0036	0.0018	0.0019	0.0028	0.0025	0.003	0.0056	0.0044	0.0056	0.0027	0.0023	0.0018	0.0022	0.0015	0.0033	0.0017	0.0019	0.0017	0.0014
TAG	TAG49:2FA15:0	Mol%	0.0294	0.0253	0.0239	0.0197	0.0187	0.0291	0.028	0.0316	0.0416	0.0417	0.0503	0.0333	0.032	0.0248	0.0213	0.0221	0.026	0.0211	0.0215	0.0233	0.0232
TAG	TAG49:2FA16:0	Mol%	0.034	0.0286	0.028	0.0231	0.0216	0.0319	0.0284	0.0323	0.0423	0.0431	0.0526	0.0332	0.0354	0.0249	0.0283	0.0242	0.031	0.0246	0.0226	0.0254	0.0256
TAG	TAG49:2FA16:1	Mol%	0.0147	0.0077	0.0084	0.0068	0.0069	0.0074	0.0049	0.0072	0.0105	0.0184	0.0128	0.0086	0.008	0.011	0.0066	0.0047	0.0074	0.0045	0.0042	0.0062	0.004
TAG	TAG49:2FA17:0	Mol%	0.0024	0.0014	0.0018	0.0014	0.0014	0.002	0.0026	0.0023	0.0049	0.0037	0.0047	0.0021	0.0021	0.0029		0.0015	0.0025	0.0014	0.0013	0.0013	0.0012
TAG	TAG49:2FA18:1	Mol%	0.0135	0.0081	0.0081	0.0065	0.0081	0.0094	0.0073	0.0083	0.0158	0.0165	0.0146	0.0099	0.0085	0.0096	0.0085	0.0053	0.01	0.0056	0.0057	0.0068	0.0058
TAG	TAG49:2FA18:2	Mol%	0.0356	0.0268	0.0328	0.0205	0.0194	0.0246	0.0253	0.0255	0.0367	0.0299	0.0407	0.0273	0.0284	0.0224	0.0268	0.0211	0.0372	0.0252	0.0206	0.0219	0.0242
TAG	TAG49:3FA15:0	Mol%	0.0101	0.0078	0.0083	0.006	0.0065	0.0085	0.0058	0.0087	0.0136	0.0155	0.0149	0.0097	0.0096	0.0065	0.0069	0.0067	0.0077	0.0055	0.0054	0.0071	0.0057
TAG	TAG49:3FA16:0	Mol%	0.0073	0.0048	0.0058	0.0036	0.003	0.0048	0.0055	0.0052	0.0079	0.0072	0.0088	0.005	0.0057	0.0046	0.0067	0.0038	0.0064	0.0041	0.0033	0.0039	0.0039
TAG	TAG49:3FA16:1	Mol%	0.0113	0.0088	0.0084	0.0078	0.0072	0.0081	0.0056	0.0094	0.0147	0.0194	0.0166	0.0106	0.0099	0.0076	0.0095	0.0064	0.0087	0.0057	0.0062	0.0076	0.006
TAG	TAG49:3FA18:2	Mol%	0.0152	0.0107	0.0124	0.0096	0.0101	0.0141	0.0111	0.0148	0.0261	0.0223	0.0269	0.0154	0.0156	0.0104	0.0133	0.0096	0.0119	0.0087	0.0072	0.0122	0.0094
TAG	TAG49:3FA18:3	Mol%	0.0041	0.0022	0.0041	0.0013	0.0017	0.0015	0.001	0.0014	0.0018	0.0016	0.0018	0.0013	0.0016	0.0015	0.0024	0.0014	0.0037	0.0021	0.0017	0.0013	0.0014
TAG	TAG50:0FA14:0	Mol%	0.0022	0.002	0.0024	0.0012	0.001	0.0008	0.001	0.0007	0.0011	0.001	0.0008	0.0006	0.0006	0.0011	0.0018	0.0006	0.003	0.001	0.0011	0.0006	0.0008
TAG	TAG50:0FA16:0	Mol%	0.1082	0.0996	0.078	0.082	0.079	0.1155	0.0965	0.1079	0.0977	0.1052	0.1226	0.111	0.1025	0.0936	0.0817	0.0855	0.0884	0.0874	0.0859	0.0923	0.0824
TAG	TAG50:0FA18:0	Mol%	0.0263	0.023	0.0178	0.0183	0.0173	0.0229	0.0211	0.0214	0.0185	0.019	0.0232	0.0218	0.019	0.0203	0.0179	0.0166	0.0208	0.0188	0.0171	0.0173	0.0159
TAG	TAG50:1FA14:0	Mol%	0.0154	0.009	0.0081	0.0073	0.0081	0.014	0.0101	0.0118	0.0164	0.0146	0.0157	0.0121	0.01	0.0084	0.0093	0.0067	0.0104	0.0067	0.0069	0.0081	0.0066
TAG	TAG50:1FA16:0	Mol%	1.0985	1.0834	0.8269	0.9121	0.9174	1.2688	1.0111	1.2429	1.0702	1.2768	1.3997	1.2726	1.2049	0.9987	0.8958	1.013	0.8708	0.9649	0.9421	1.102	0.9726
TAG	TAG50:1FA16:1	Mol%	0.0558	0.0393	0.0223	0.0334	0.0336	0.0403	0.0218	0.0385	0.0396	0.0651	0.0535	0.0452	0.0403	0.0234	0.0286	0.0248	0.0291	0.0203	0.0176	0.0369	0.0213
TAG	TAG50:1FA18:0	Mol%	0.0382	0.0241	0.0161	0.0193	0.019	0.0271	0.0182	0.0248	0.0284	0.0315	0.0343	0.0286	0.0229	0.0169	0.0198	0.0144	0.0169	0.0146	0.0129	0.0196	0.0132
TAG	TAG50:1FA18:1	Mol%	0.5363	0.4941	0.3686	0.4193	0.4228	0.5448	0.4323	0.5117	0.4676	0.5444	0.5815	0.5631	0.5266	0.4381	0.4098	0.426	0.3873	0.4219	0.4215	0.4952	0.4336
TAG	TAG50:1FA20:1	Mol%	0.0031	0.0011	0.002	0.0012	0.0012	0.0013	0.0014	0.0013	0.0015	0.002	0.0014	0.0013	0.0012	0.001	0.0018	0.0009		0.0015	0.0013	0.0012	0.0011
TAG	TAG50:2FA14:0	Mol%	0.1298	0.0786	0.0526	0.0664	0.0703	0.1138	0.0818	0.1038	0.1454	0.129	0.1368	0.1038	0.0854	0.0673	0.0631	0.0602	0.0679	0.0566	0.059	0.0774	0.0602
TAG	TAG50:2FA14:1	Mol%	0.0017	0.0011	0.0019	0.0009	0.001	0.0019	0.0024	0.0018	0.0042	0.0022	0.0027	0.0017	0.0014	0.0016	0.0014	0.0011	0.0022	0.0012	0.0011	0.0012	0.0008
TAG	TAG50:2FA16:0	Mol%	1.7201	2.0727	1.6009	1.8404	1.8398	2.431	2.1182	2.7499	2.6531	2.756	3.3313	2.6906	2.7602	2.0079	1.6947	2.2993	1.5886	1.9732	2.0189	2.379	2.1982
TAG	TAG50:2FA16:1	Mol%	0.566	0.4112	0.2476	0.3755	0.3815	0.4307	0.2285	0.4513	0.438	0.7541	0.5905	0.5029	0.4759	0.2478	0.3032	0.294	0.2714	0.2188	0.1944	0.4254	0.2448
TAG	TAG50:2FA18:0	Mol%	0.0163	0.0137	0.0134	0.0108	0.0109	0.0221	0.0203	0.0214	0.0342	0.0243	0.0331	0.0213	0.0171	0.0159	0.0133	0.0122	0.0114	0.0108	0.0108	0.0145	0.0099
TAG	TAG50:2FA18:1	Mol%	0.8458	0.5475	0.3144	0.4968	0.4977	0.5894	0.3352	0.5646	0.5781	0.8509	0.7222	0.6377	0.5712	0.3437	0.3924	0.3725	0.3641	0.3108	0.2699	0.5337	0.331
TAG	TAG50:2FA18:2	Mol%	0.578	0.7869	0.6623	0.7155	0.7043	0.976	0.901	1.1382	1.0472	0.9621	1.3503	1.0667	1.1592	0.8151	0.6805	0.9733	0.6326	0.8392	0.8459	0.9766	0.9207
TAG	TAG50:2FA20:2	Mol%	0.0019	0.0008	0.0018	0.001	0.0007	0.0009	0.001	0.0009	0.0015	0.0017	0.0014	0.0011	0.0011	0.001	0.0013	0.0007		0.0011	0.001	0.0007	0.0007
TAG	TAG50:3FA14:0	Mol%	0.1912	0.1602	0.115	0.1557	0.1516	0.2716	0.1909	0.2637	0.374	0.2742	0.3483	0.25	0.24	0.1715	0.1332	0.175	0.1309	0.143	0.1473	0.195	0.1596
TAG	TAG50:3FA14:1	Mol%	0.0054	0.0045	0.0068	0.0046	0.0036	0.0143	0.0128	0.0149	0.0287	0.0161	0.0191	0.0107	0.0107	0.0097	0.0076	0.0063	0.0074	0.0046	0.0047	0.008	0.0049
TAG	TAG50:3FA16:0	Mol%	0.6332	0.6855	0.4588	0.6328	0.6357	0.7944	0.4521	0.9486	0.9732	1.1749	1.2929	0.9368	1.0051	0.4723	0.5008	0.627	0.4148	0.452	0.404	0.7986	0.5095
TAG	TAG50:3FA16:1	Mol%	0.6489	0.6468	0.4108	0.6134	0.5857	0.7152	0.4135	0.8957	0.9921	1.3791	1.2603	0.8967	0.9086	0.429	0.4764	0.5724	0.4129	0.409	0.3483	0.7415	0.4682
TAG	TAG50:3FA18:0	Mol%	0.0021	0.0025	0.0032	0.0019	0.0016	0.0043	0.0044	0.0047	0.0077	0.0046	0.0062	0.0042	0.0035	0.0037	0.003	0.0025	0.003	0.0029	0.0027	0.0029	0.0022
TAG	TAG50:3FA18:1	Mol%	0.3019	0.2491	0.1768	0.2279	0.2317	0.3801	0.2641	0.4096	0.5431	0.4827	0.533	0.3797	0.3443	0.2525	0.2028	0.2456	0.1983	0.199	0.1963	0.3033	0.2254
TAG	TAG50:3FA18:2	Mol%	0.7629	0.7121	0.4905	0.6775	0.6811	0.8445	0.5459	1.0066	1.0603	1.1851	1.2789	0.9616	1.0158	0.5438	0.5706	0.6861	0.471	0.4884	0.4623	0.8234	0.5695
TAG	TAG50:3FA18:3	Mol%	0.0397	0.0341	0.0283	0.0337	0.0335	0.0455	0.0224	0.0548	0.0467	0.036	0.0642	0.048	0.0583	0.0313	0.0253	0.0411	0.0234	0.0326	0.0303	0.0433	0.0343
TAG	TAG50:3FA20:3	Mol%	0.0022	0.001		0.0014	0.0013	0.0011	0.0012	0.0013	0.0018	0.0021	0.002	0.0011	0.0014	0.0014	0.0017	0.0008	0.0029	0.0013	0.0008	0.0011	0.0008
TAG	TAG50:4FA14:0	Mol%	0.0507	0.0576	0.0455	0.0588	0.0583	0.116	0.0726	0.115	0.1482	0.0848	0.1506	0.1001	0.1078	0.0682	0.0492	0.0817	0.0479	0.065	0.0706	0.0886	0.0747
TAG	TAG50:4FA14:1	Mol%	0.0049	0.0051	0.0061	0.0046	0.0049	0.0182	0.015	0.0183	0.0411	0.0186	0.0255	0.0129	0.0143	0.0114	0.0068	0.0084	0.0062	0.005	0.0055	0.01	0.0055
TAG	TAG50:4FA16:0	Mol%	0.0341	0.0407	0.0322	0.0378	0.0392	0.0714	0.0436	0.081	0.1031	0.0684	0.1129	0.0712	0.0828	0.0418	0.0332	0.0469	0.0261	0.0333	0.0323	0.0557	0.0395
TAG	TAG50:4FA16:1	Mol%	0.0759	0.068	0.0357	0.0607	0.0598	0.0934	0.0372	0.1087	0.1709	0.2507	0.207	0.1103	0.1092	0.0407	0.0422	0.0544	0.038	0.0346	0.0279	0.0917	0.044
TAG	TAG50:4FA18:1	Mol%	0.0141	0.0136	0.01	0.0131	0.0119	0.0349	0.0192	0.0338	0.0622	0.0348	0.0497	0.0279	0.0302	0.0181	0.0122	0.0177	0.0107	0.0135	0.0124	0.0213	0.0139
TAG	TAG50:4FA18:2	Mol%	0.1242	0.155	0.1204	0.153	0.147	0.3054	0.1903	0.3109	0.4221	0.2803	0.4113	0.2688	0.2903	0.174	0.1353	0.2039	0.1172	0.1532	0.1582	0.2338	0.179
TAG	TAG50:4FA18:3	Mol%	0.0343	0.0239	0.0158	0.025	0.0238	0.0344	0.0115	0.0356	0.0402	0.0346	0.0504	0.034	0.0383	0.0156	0.0203	0.023	0.0148	0.0154	0.0138	0.0298	0.0173
TAG	TAG50:4FA20:3	Mol%	0.0018	0.0015	0.002	0.001	0.0011	0.0009	0.0009	0.001	0.0016	0.0014	0.0013	0.0007	0.001	0.001		0.0008		0.0012	0.0008	0.0007	0.0007
TAG	TAG50:4FA20:4	Mol%	0.0023	0.0019	0.0026	0.0013	0.0013	0.0022	0.0034	0.0025	0.0028	0.0029	0.0029	0.0023	0.0025	0.0018	0.0023	0.0014	0.003	0.0014	0.0013	0.0017	0.0014
TAG	TAG50:5FA14:0	Mol%	0.0086	0.007	0.0074	0.0071	0.0064	0.0122	0.006	0.0141	0.0186	0.0107	0.0205	0.0118	0.0144	0.0054	0.0052	0.009	0.0058	0.0063	0.0054	0.0102	0.0074
TAG	TAG50:5FA14:1	Mol%	0.0045	0.0047	0.0057	0.0041	0.0034	0.0122	0.0095	0.0132	0.0293	0.0107	0.0178	0.01	0.0113	0.0092	0.0056	0.0069	0.008	0.0057	0.0056	0.008	0.0052
TAG	TAG50:5FA16:0	Mol%	0.0046	0.0051	0.0051	0.0048	0.0049	0.0111	0.0068	0.0129	0.0156	0.0081	0.0154	0.0103	0.0129	0.0063	0.0049	0.0072	0.0043	0.0043	0.0041	0.0078	0.0057
TAG	TAG50:5FA16:1	Mol%	0.0078	0.0062	0.0046	0.0055	0.0053	0.0124	0.0052	0.0139	0.0305	0.0238	0.0279	0.013	0.0134	0.0048	0.0047	0.0065	0.0052	0.0052	0.0038	0.009	0.0051
TAG	TAG50:5FA18:1	Mol%	0.0024	0.0021	0.0026	0.0017	0.002	0.0058	0.0045	0.0069	0.0135	0.005	0.0097	0.0048	0.0052	0.0037	0.003	0.0033	0.0034	0.002	0.0023	0.0035	0.0022
TAG	TAG50:5FA18:2	Mol%	0.0107	0.0148	0.0132	0.0145	0.0133	0.0395	0.0245	0.0466	0.087	0.0381	0.0645	0.0343	0.0412	0.0239	0.0141	0.0248	0.013	0.0148	0.0161	0.0279	0.0177
TAG	TAG50:5FA18:3	Mol%	0.0137	0.0103	0.0093	0.0116	0.011	0.0197	0.0082	0.0227	0.034	0.0201	0.0337	0.0191	0.0224	0.0119	0.0105	0.0149	0.0078	0.0088	0.0088	0.0163	0.0113
TAG	TAG50:5FA20:4	Mol%	0.0016	0.001	0.0021	0.0012	0.0009	0.0014	0.0025	0.0016	0.0026	0.0023	0.002	0.0016	0.0016	0.0019	0.0018	0.0013	0.0025		0.0013	0.0008	0.0008
TAG	TAG50:5FA20:5	Mol%	0.0021	0.0015	0.0023	0.0012	0.0013	0.0014	0.002	0.002	0.0018	0.0011	0.0021	0.0014	0.0022	0.001	0.002	0.0014	0.0015	0.001	0.0013	0.0014	0.0012
TAG	TAG50:6FA20:4	Mol%		0.0011	0.0027	0.001	0.0011	0.0019	0.0034	0.0019	0.0038	0.0019	0.0024	0.0014	0.0021	0.0016	0.0019	0.0012		0.001	0.0012	0.001	0.0008
TAG	TAG51:0FA16:0	Mol%	0.0113	0.0087	0.0092	0.0056	0.0057	0.0055	0.0071	0.0062	0.0063	0.0049	0.0068	0.0056	0.0069	0.0064	0.0096	0.0055	0.0129	0.0069	0.0052	0.0051	0.0047
TAG	TAG51:0FA17:0	Mol%	0.0032	0.0029	0.0031	0.0015	0.0019	0.002	0.0023	0.0013	0.0019	0.0019	0.0022	0.0018	0.0014	0.0022	0.0028	0.0015	0.0036	0.002	0.0015	0.0012	0.0016
TAG	TAG51:0FA18:0	Mol%	0.0048	0.0044	0.0055	0.0022	0.0022	0.0011	0.0019	0.0011	0.0015	0.0012	0.0013	0.0009	0.0011	0.0023	0.0041	0.0011	0.0081	0.0027	0.0021	0.0009	0.0015
TAG	TAG51:1FA15:0	Mol%	0.0071	0.0039	0.006	0.0042	0.0038	0.0035	0.0037	0.0027	0.003	0.0038	0.0032	0.0033	0.0027	0.0039	0.0043	0.0024	0.007	0.0032	0.0032	0.0026	0.0024
TAG	TAG51:1FA16:0	Mol%	0.0373	0.0251	0.0293	0.0202	0.0188	0.0222	0.0255	0.02	0.0232	0.0239	0.0266	0.0226	0.0201	0.0223	0.0257	0.0181	0.035	0.0194	0.0177	0.0168	0.0185
TAG	TAG51:1FA17:0	Mol%	0.0222	0.0199	0.0203	0.0148	0.0155	0.0177	0.0198	0.0162	0.0198	0.0194	0.0226	0.018	0.0152	0.0188	0.0191	0.0148	0.0211	0.0149	0.016	0.0125	0.0153
TAG	TAG51:1FA18:0	Mol%	0.011	0.0079	0.0112	0.0054	0.0057	0.0046	0.0049	0.0035	0.0042	0.0048	0.0049	0.0043	0.0034	0.0059	0.0096	0.003	0.014	0.0051	0.0059	0.0032	0.0048
TAG	TAG51:1FA18:1	Mol%	0.0441	0.028	0.0323	0.0205	0.0202	0.0208	0.0222	0.0164	0.0192	0.0202	0.0218	0.02	0.0163	0.0191	0.03	0.0161	0.0423	0.0205	0.0181	0.015	0.018
TAG	TAG51:2FA15:0	Mol%	0.0484	0.0353	0.03	0.0264	0.0284	0.0271	0.0268	0.0215	0.0225	0.0282	0.0253	0.0269	0.0241	0.0236	0.0296	0.0198	0.0297	0.0235	0.0208	0.0237	0.0246
TAG	TAG51:2FA16:0	Mol%	0.1159	0.083	0.1023	0.0709	0.068	0.0595	0.0613	0.0582	0.0643	0.0738	0.0822	0.0656	0.0607	0.0533	0.091	0.0525	0.1131	0.0642	0.057	0.0532	0.0551
TAG	TAG51:2FA16:1	Mol%	0.0084	0.0069	0.0052	0.0049	0.0038	0.0053	0.0042	0.0052	0.0082	0.0101	0.0093	0.0063	0.0056	0.0058	0.0046	0.0038	0.0058	0.0034	0.0032	0.0046	0.0034
TAG	TAG51:2FA17:0	Mol%	0.0369	0.0315	0.0324	0.0264	0.0275	0.0339	0.0397	0.036	0.0435	0.0379	0.0531	0.0357	0.0343	0.0301	0.0342	0.0286	0.0338	0.0286	0.0286	0.0241	0.0289
TAG	TAG51:2FA18:0	Mol%	0.0257	0.0164	0.0328	0.0123	0.0136	0.0058	0.0109	0.0051	0.0069	0.0069	0.0066	0.0055	0.0049	0.0098	0.0268	0.0061	0.0377	0.014	0.0131	0.0059	0.01
TAG	TAG51:2FA18:1	Mol%	0.1718	0.1075	0.1118	0.0962	0.0958	0.0858	0.0681	0.0678	0.0643	0.094	0.0819	0.0857	0.0727	0.0708	0.1072	0.0631	0.1246	0.0736	0.0674	0.0726	0.0747
TAG	TAG51:2FA18:2	Mol%	0.056	0.0413	0.0558	0.0323	0.0318	0.034	0.0377	0.0327	0.0376	0.0306	0.0443	0.0349	0.0344	0.0328	0.0457	0.0286	0.0564	0.0346	0.0293	0.027	0.0338
TAG	TAG51:3FA15:0	Mol%	0.0798	0.0726	0.0653	0.068	0.0654	0.0692	0.0624	0.0577	0.0545	0.0647	0.0704	0.0689	0.0658	0.0604	0.0688	0.0578	0.064	0.0582	0.0557	0.0622	0.0674
TAG	TAG51:3FA16:0	Mol%	0.8128	0.5626	1.2824	0.5137	0.5272	0.1138	0.3133	0.1192	0.1714	0.2178	0.1451	0.1234	0.1133	0.3338	1.0551	0.2147	1.5369	0.5409	0.5447	0.1683	0.3294
TAG	TAG51:3FA16:1	Mol%	0.0151	0.0124	0.0093	0.0094	0.0105	0.0129	0.0081	0.0119	0.0199	0.0266	0.022	0.0148	0.0119	0.008	0.0092	0.0089	0.0103	0.0062	0.0061	0.0103	0.0071
TAG	TAG51:3FA17:0	Mol%	0.0092	0.0076	0.0063	0.0057	0.0064	0.0085	0.0065	0.0085	0.0137	0.0129	0.0164	0.0092	0.0085	0.0057	0.0066	0.0063	0.0066	0.0052	0.0043	0.0054	0.0055
TAG	TAG51:3FA18:1	Mol%	0.6648	0.4671	1.0232	0.4383	0.4322	0.1322	0.2799	0.1222	0.1648	0.2077	0.1448	0.1301	0.1191	0.311	0.8487	0.2031	1.2271	0.4508	0.4337	0.1651	0.2951
TAG	TAG51:3FA18:2	Mol%	0.1469	0.1264	0.1161	0.1162	0.1231	0.1257	0.0959	0.1077	0.1071	0.12	0.1384	0.1245	0.1231	0.0989	0.1201	0.1049	0.1154	0.0992	0.0861	0.1142	0.1144
TAG	TAG51:3FA18:3	Mol%	0.0066	0.003	0.0053	0.0023	0.0027	0.0021	0.0012	0.0016	0.0022	0.0017	0.0027	0.002	0.0023	0.0019	0.0038	0.0016	0.005	0.0025	0.0019	0.0017	0.0018
TAG	TAG51:4FA15:0	Mol%	0.0383	0.0455	0.0441	0.0436	0.0455	0.0516	0.044	0.0445	0.0435	0.0356	0.0485	0.0476	0.0532	0.0406	0.0435	0.0481	0.0388	0.0433	0.0419	0.0468	0.0522
TAG	TAG51:4FA16:0	Mol%	0.1078	0.0656	0.169	0.0631	0.064	0.0155	0.0389	0.0172	0.0254	0.0273	0.0207	0.0169	0.017	0.0423	0.1348	0.0286	0.1905	0.0687	0.0653	0.0227	0.042
TAG	TAG51:4FA16:1	Mol%	0.0115	0.0085	0.0066	0.008	0.007	0.0086	0.0048	0.0091	0.0159	0.0224	0.018	0.0115	0.0097	0.0057	0.007	0.0067	0.0077	0.0049	0.0048	0.0082	0.0058
TAG	TAG51:4FA18:1	Mol%	0.0834	0.058	0.1271	0.0489	0.0513	0.0149	0.0336	0.0149	0.025	0.0269	0.0195	0.0165	0.0148	0.0371	0.1074	0.0243	0.1503	0.0539	0.0539	0.019	0.0364
TAG	TAG51:4FA18:2	Mol%	0.0884	0.0947	0.103	0.093	0.0956	0.1056	0.0876	0.0974	0.098	0.0856	0.1077	0.1025	0.1115	0.0823	0.0926	0.0988	0.085	0.0929	0.09	0.1007	0.1095
TAG	TAG51:4FA18:3	Mol%	0.0133	0.0096	0.0099	0.0092	0.0087	0.0089	0.0047	0.0084	0.0081	0.0077	0.0104	0.0085	0.01	0.0059	0.0084	0.0075	0.0095	0.0066	0.006	0.0087	0.0078
TAG	TAG51:4FA20:4	Mol%	0.0027	0.001	0.0026	0.0012	0.0011	0.0009	0.0015	0.0006	0.0011	0.0013	0.0008	0.0009	0.001	0.001	0.0029	0.0007	0.0028	0.0013	0.0011	0.0007	0.0008
TAG	TAG51:5FA18:2	Mol%	0.0114	0.0086	0.012	0.0087	0.0086	0.0106	0.0076	0.0107	0.017	0.0115	0.0157	0.0106	0.012	0.008	0.01	0.0098	0.0096	0.0094	0.0078	0.0098	0.0093
TAG	TAG51:5FA18:3	Mol%	0.0093	0.008	0.0073	0.0071	0.0067	0.0074	0.0042	0.0073	0.0083	0.0071	0.0103	0.0072	0.0092	0.0048	0.0072	0.0071	0.0075	0.0063	0.0062	0.0073	0.0077
TAG	TAG52:0FA16:0	Mol%	0.0249	0.019	0.0191	0.0133	0.0134	0.0157	0.017	0.0123	0.0119	0.0138	0.0127	0.0146	0.0118	0.0164	0.018	0.0113	0.0188	0.0145	0.0133	0.011	0.0106
TAG	TAG52:0FA18:0	Mol%	0.0315	0.0247	0.0233	0.0185	0.02	0.0201	0.0219	0.0166	0.0145	0.0168	0.0167	0.0197	0.0156	0.019	0.0239	0.0142	0.0262	0.0185	0.017	0.0155	0.0145
TAG	TAG52:0FA20:0	Mol%	0.0059	0.0026	0.0042	0.0025	0.0028	0.0028	0.0025	0.0026	0.0031	0.0032	0.0033	0.003	0.0024	0.0043	0.0041	0.0024	0.0051	0.0031	0.0041	0.0026	0.0031
TAG	TAG52:1FA16:0	Mol%	0.4734	0.3358	0.2975	0.3136	0.3175	0.3239	0.3049	0.2622	0.1928	0.2593	0.245	0.3018	0.2535	0.3008	0.3123	0.235	0.2946	0.2648	0.2361	0.2613	0.2362
TAG	TAG52:1FA16:1	Mol%	0.006	0.004	0.0045	0.0035	0.003	0.0033	0.0028	0.0031	0.0043	0.0055	0.0037	0.0033	0.0023	0.0036	0.005	0.0021	0.0048	0.0025	0.0023	0.0027	0.002
TAG	TAG52:1FA18:0	Mol%	0.3003	0.2142	0.203	0.1942	0.1956	0.2312	0.2232	0.184	0.1433	0.1654	0.1886	0.2075	0.1707	0.2015	0.2106	0.1588	0.1958	0.1792	0.1608	0.1705	0.1539
TAG	TAG52:1FA18:1	Mol%	0.6788	0.4984	0.4046	0.4811	0.4614	0.4851	0.4143	0.3867	0.256	0.3664	0.3356	0.4425	0.3746	0.4188	0.4562	0.3553	0.427	0.3939	0.3483	0.4105	0.3589
TAG	TAG52:1FA20:0	Mol%	0.0061	0.0029	0.0038	0.0032	0.0032	0.0029	0.0024	0.003	0.0039	0.0053	0.0039	0.0039	0.0026	0.0031	0.003	0.002	0.0035	0.002	0.0024	0.0029	0.0025
TAG	TAG52:1FA20:1	Mol%	0.0112	0.0069	0.0078	0.007	0.0073	0.0063	0.009	0.0069	0.0067	0.0108	0.0066	0.008	0.0064	0.0094	0.0086	0.0067	0.0075	0.0077	0.0072	0.0073	0.0067
TAG	TAG52:2FA14:0	Mol%	0.0043	0.0029	0.0032	0.0021	0.0023	0.0027	0.0035	0.0027	0.0058	0.0071	0.0039	0.0035	0.0023	0.0034	0.0032	0.002	0.0037	0.0024	0.0019	0.0025	0.0021
TAG	TAG52:2FA16:0	Mol%	3.9611	3.0988	2.589	2.9766	3.0454	2.8319	2.5033	2.2967	1.6629	2.2335	2.1495	2.7098	2.4491	2.5833	2.9018	2.3507	2.5787	2.4798	2.2473	2.7377	2.3842
TAG	TAG52:2FA16:1	Mol%	0.0685	0.0513	0.0335	0.0451	0.0438	0.0561	0.0381	0.0453	0.0577	0.0887	0.0619	0.06	0.0402	0.0381	0.0434	0.0322	0.04	0.0322	0.0281	0.0447	0.032
TAG	TAG52:2FA18:0	Mol%	0.3688	0.3531	0.3884	0.3246	0.3169	0.4004	0.428	0.3615	0.3162	0.3007	0.4086	0.3976	0.3452	0.3709	0.3794	0.3191	0.3288	0.3407	0.3102	0.3224	0.3102
TAG	TAG52:2FA18:1	Mol%	7.0511	5.4149	4.2809	5.157	4.9622	4.4506	3.8771	3.6817	2.6222	3.855	3.3077	4.2732	3.833	4.3115	4.9218	3.7821	4.4011	4.1216	3.6005	4.3988	4.0106
TAG	TAG52:2FA18:2	Mol%	0.6726	0.6742	0.6354	0.6631	0.6571	0.7339	0.6824	0.6397	0.4586	0.4735	0.6007	0.6707	0.6811	0.6604	0.6702	0.6368	0.5705	0.6516	0.5999	0.67	0.632
TAG	TAG52:2FA20:0	Mol%	0.0054	0.0034	0.0038	0.0038	0.0042	0.0045	0.0039	0.0038	0.0053	0.0055	0.0048	0.0048	0.0039	0.0044	0.0047	0.0034	0.005	0.004	0.0036	0.0037	0.004
TAG	TAG52:2FA20:1	Mol%	0.0182	0.0099	0.0085	0.0099	0.0088	0.0083	0.0087	0.0091	0.0109	0.0225	0.0108	0.0113	0.0087	0.008	0.0093	0.0065	0.0094	0.0059	0.0058	0.0106	0.0073
TAG	TAG52:2FA20:2	Mol%	0.0081	0.0057	0.0076	0.0053	0.005	0.0055	0.0062	0.0058	0.0073	0.01	0.0073	0.0066	0.0057	0.007	0.006	0.0044	0.0071	0.0074	0.0057	0.0059	0.0061
TAG	TAG52:3FA14:0	Mol%	0.0071	0.0047	0.0044	0.0039	0.0049	0.0059	0.0068	0.0068	0.012	0.0141	0.0089	0.0062	0.0054	0.0057	0.0052	0.0039	0.007	0.0047	0.004	0.005	0.0045
TAG	TAG52:3FA16:0	Mol%	6.5902	6.7211	6.1245	7.119	7.0528	5.9888	6.0045	5.6524	4.3142	4.8071	4.9972	5.8384	6.0282	5.9892	6.5841	6.303	5.7345	6.3856	6.0635	6.2979	6.3214
TAG	TAG52:3FA16:1	Mol%	0.5371	0.4096	0.2571	0.3585	0.3488	0.4292	0.2731	0.3933	0.4556	0.7248	0.4756	0.4422	0.3523	0.2849	0.3001	0.2633	0.3002	0.2501	0.2223	0.3906	0.2561
TAG	TAG52:3FA18:0	Mol%	0.071	0.0668	0.0609	0.0607	0.0631	0.0795	0.0609	0.0802	0.0954	0.0886	0.1035	0.081	0.0698	0.0567	0.0614	0.0562	0.0556	0.0529	0.0478	0.0637	0.0492
TAG	TAG52:3FA18:1	Mol%	7.3143	7.3269	6.5081	7.4998	7.4111	6.1943	6.3869	5.767	4.8998	5.641	5.5866	6.1771	6.196	6.3213	6.9879	6.5288	6.1641	6.5379	6.1784	6.4568	6.3081
TAG	TAG52:3FA18:2	Mol%	6.2592	6.4839	5.9994	6.6102	6.8116	5.8535	5.8263	5.3135	4.1737	4.4285	4.8402	5.5939	5.7729	5.8258	6.3124	6.1071	5.2661	6.0891	5.985	6.0885	6.0303
TAG	TAG52:3FA18:3	Mol%	0.0575	0.0524	0.0398	0.056	0.0554	0.0588	0.0351	0.0535	0.0391	0.0339	0.0513	0.0542	0.0611	0.0425	0.0462	0.0532	0.0357	0.0464	0.0455	0.0578	0.0491
TAG	TAG52:3FA20:0	Mol%	0.0179	0.0201	0.0172	0.0194	0.0203	0.0205	0.017	0.0176	0.0126	0.0142	0.0163	0.0189	0.0204	0.0153	0.0165	0.0187	0.0151	0.0196	0.0168	0.021	0.0188
TAG	TAG52:3FA20:1	Mol%	0.0107	0.0092	0.0081	0.0077	0.0089	0.01	0.0111	0.0113	0.0157	0.0192	0.0128	0.0118	0.0095	0.0092	0.0085	0.0078	0.0078	0.0083	0.008	0.0093	0.0086
TAG	TAG52:3FA20:2	Mol%	0.0162	0.0122	0.009	0.0127	0.013	0.0116	0.0102	0.0116	0.0128	0.0202	0.0148	0.0136	0.0119	0.0102	0.0115	0.0105	0.0117	0.0099	0.009	0.012	0.0099
TAG	TAG52:3FA20:3	Mol%	0.0136	0.0105	0.0104	0.0093	0.0093	0.0087	0.008	0.0078	0.0087	0.0115	0.0089	0.0082	0.0078	0.0074	0.0105	0.007	0.0101	0.0105	0.0083	0.007	0.0078
TAG	TAG52:3FA22:1	Mol%	0.0051	0.0052	0.0041	0.0051	0.0051	0.0054	0.0045	0.0051	0.0037	0.0041	0.0044	0.005	0.0051	0.0047	0.0055	0.0055	0.0039	0.0053	0.006	0.0055	0.0052
TAG	TAG52:4FA14:0	Mol%	0.0077	0.0051	0.0064	0.0055	0.005	0.0055	0.0057	0.0064	0.0106	0.0117	0.0093	0.0064	0.0051	0.0054	0.006	0.0041	0.0093	0.0051	0.0043	0.0045	0.0046
TAG	TAG52:4FA16:0	Mol%	3.2272	4.1419	4.3844	4.8561	4.8395	4.4912	4.1387	4.4766	3.0509	2.6275	3.8007	4.3962	5.0468	4.4453	4.2775	5.2584	3.2753	4.7677	4.6958	5.0269	5.1268
TAG	TAG52:4FA16:1	Mol%	0.8143	0.8206	0.5741	0.7435	0.777	0.9555	0.6246	0.9825	1.1372	1.4	1.1833	1.0308	0.9026	0.6835	0.6505	0.7155	0.5638	0.605	0.5511	0.9593	0.7197
TAG	TAG52:4FA18:0	Mol%	0.0092	0.0083	0.0085	0.0076	0.0073	0.0119	0.0096	0.0114	0.0195	0.0103	0.0159	0.0109	0.0104	0.0105	0.009	0.008	0.0075	0.0081	0.0076	0.0091	0.0077
TAG	TAG52:4FA18:1	Mol%	1.1419	1.1836	0.8695	1.1131	1.1327	1.3307	0.8298	1.3464	1.4935	1.7269	1.565	1.4046	1.3798	0.9236	0.9453	1.0629	0.8294	0.9147	0.8322	1.3364	1.0296
TAG	TAG52:4FA18:2	Mol%	5.8064	7.4785	7.9235	8.2738	8.4612	6.9764	7.4103	6.8544	5.928	5.3982	6.187	6.9366	7.6607	7.4284	7.7142	8.7472	5.8573	8.381	8.3073	7.7808	8.6291
TAG	TAG52:4FA18:3	Mol%	0.6308	0.5187	0.4816	0.5536	0.5908	0.5476	0.3453	0.563	0.3849	0.3584	0.5154	0.5552	0.6519	0.4312	0.4616	0.5767	0.375	0.4801	0.4667	0.6	0.5232
TAG	TAG52:4FA20:0	Mol%	0.0259	0.0325	0.0338	0.0381	0.0386	0.0402	0.0334	0.04	0.0255	0.0232	0.0345	0.0383	0.0474	0.0336	0.0337	0.0455	0.0255	0.0362	0.039	0.0429	0.0433
TAG	TAG52:4FA20:2	Mol%	0.01	0.008	0.0072	0.0084	0.008	0.0101	0.0092	0.0106	0.0128	0.0148	0.0137	0.01	0.0099	0.0091	0.008	0.0088	0.0084	0.0077	0.008	0.0094	0.0092
TAG	TAG52:4FA20:3	Mol%	0.0251	0.016	0.0145	0.0166	0.0199	0.0159	0.0121	0.0158	0.0183	0.0256	0.0195	0.0169	0.0178	0.0136	0.0142	0.0135	0.0126	0.0138	0.0121	0.0171	0.0146
TAG	TAG52:4FA20:4	Mol%	0.031	0.0214	0.0248	0.0229	0.022	0.0229	0.034	0.0233	0.0221	0.0304	0.022	0.0233	0.0252	0.0221	0.021	0.0213	0.0264	0.0205	0.0184	0.018	0.0198
TAG	TAG52:4FA22:1	Mol%	0.007	0.0086	0.0069	0.0098	0.0088	0.0105	0.0076	0.0106	0.0079	0.0084	0.0092	0.0104	0.0114	0.0083	0.0096	0.0107	0.0075	0.0092	0.0082	0.0108	0.0095
TAG	TAG52:4FA22:4	Mol%	0.0033	0.0029	0.0043	0.0033	0.0034	0.0038	0.0029	0.0038	0.0025	0.0024	0.0032	0.0034	0.0042	0.0029	0.0025	0.0038	0.0034	0.0031	0.0037	0.0037	0.0036
TAG	TAG52:5FA14:0	Mol%	0.0096	0.0049	0.0045	0.0047	0.0057	0.007	0.0063	0.0081	0.0125	0.0131	0.0111	0.0071	0.0079	0.006	0.0048	0.005	0.0056	0.005	0.004	0.0055	0.0046
TAG	TAG52:5FA16:0	Mol%	0.4291	0.4302	0.4336	0.5341	0.5433	0.5345	0.2706	0.5987	0.4041	0.3272	0.5812	0.5549	0.7155	0.3623	0.4085	0.5797	0.3069	0.4263	0.4238	0.5875	0.5175
TAG	TAG52:5FA16:1	Mol%	0.3784	0.4664	0.367	0.4709	0.4821	0.6331	0.4156	0.7026	0.8272	0.7766	0.8135	0.6773	0.7064	0.4713	0.3811	0.568	0.3351	0.4476	0.4336	0.6486	0.5335
TAG	TAG52:5FA18:1	Mol%	0.1071	0.0982	0.0805	0.1033	0.1052	0.1681	0.0939	0.1784	0.2786	0.1907	0.2349	0.1659	0.1668	0.1116	0.0862	0.1203	0.0731	0.0956	0.0949	0.1461	0.1141
TAG	TAG52:5FA18:2	Mol%	0.8661	1.09	0.9539	1.2214	1.2326	1.4698	0.8993	1.6398	1.678	1.4887	1.8331	1.5281	1.6939	1.0946	0.9424	1.4067	0.7763	1.1041	1.0785	1.5602	1.2996
TAG	TAG52:5FA18:3	Mol%	0.6063	0.5857	0.5884	0.6902	0.7352	0.6863	0.3519	0.7485	0.5447	0.4574	0.7515	0.6752	0.8846	0.5171	0.5389	0.7553	0.42	0.5845	0.547	0.7703	0.6694
TAG	TAG52:5FA20:3	Mol%	0.0087	0.0071	0.0051	0.0071	0.0068	0.0078	0.0061	0.0092	0.0155	0.0161	0.0142	0.0082	0.0082	0.0062	0.0052	0.0061	0.0068	0.0069	0.0051	0.0076	0.0061
TAG	TAG52:5FA20:4	Mol%	0.0407	0.0202	0.0171	0.0216	0.0228	0.0221	0.0209	0.0233	0.0267	0.0445	0.0272	0.0233	0.028	0.0164	0.0211	0.0166	0.0211	0.0129	0.0112	0.0189	0.0146
TAG	TAG52:5FA20:5	Mol%	0.0247	0.0105	0.0126	0.0134	0.0141	0.0125	0.0162	0.0166	0.0089	0.0089	0.0125	0.0131	0.0195	0.0105	0.0128	0.0171	0.0137	0.0086	0.0106	0.0122	0.011
TAG	TAG52:5FA22:5	Mol%	0.017	0.0144	0.015	0.0166	0.0179	0.0197	0.0122	0.0231	0.0184	0.0136	0.0229	0.0199	0.0259	0.0135	0.0128	0.0203	0.0121	0.0173	0.0151	0.0206	0.0176
TAG	TAG52:6FA14:0	Mol%	0.0092	0.0059	0.0061	0.0061	0.0056	0.0102	0.0114	0.0134	0.0156	0.0125	0.0163	0.0106	0.0116	0.0075	0.0066	0.008	0.0067	0.0059	0.0065	0.0075	0.0057
TAG	TAG52:6FA16:0	Mol%	0.0423	0.037	0.0374	0.0443	0.0445	0.0454	0.0252	0.0551	0.0396	0.0253	0.0481	0.0427	0.0627	0.0347	0.0337	0.0524	0.0271	0.0343	0.0326	0.0512	0.0399
TAG	TAG52:6FA16:1	Mol%	0.0561	0.0539	0.0411	0.0596	0.0556	0.0752	0.0272	0.0945	0.1105	0.1075	0.1311	0.083	0.0969	0.0387	0.0429	0.0656	0.0342	0.0415	0.0408	0.0781	0.0528
TAG	TAG52:6FA18:1	Mol%	0.0106	0.0102	0.0091	0.011	0.0101	0.02	0.0122	0.0237	0.041	0.019	0.0298	0.0193	0.0212	0.0136	0.0084	0.016	0.009	0.0094	0.0112	0.0162	0.012
TAG	TAG52:6FA18:2	Mol%	0.0874	0.0977	0.0891	0.1078	0.1081	0.1782	0.1	0.2045	0.3226	0.1752	0.2641	0.1765	0.2023	0.1248	0.0856	0.1494	0.0685	0.1168	0.1159	0.164	0.1307
TAG	TAG52:6FA18:3	Mol%	0.086	0.0839	0.0699	0.0907	0.0902	0.1085	0.0388	0.1291	0.1447	0.1337	0.1758	0.1226	0.1464	0.0631	0.0622	0.097	0.047	0.0628	0.0634	0.1181	0.0789
TAG	TAG52:6FA20:4	Mol%	0.0158	0.0093	0.0098	0.0106	0.0106	0.0156	0.0181	0.0167	0.0267	0.0326	0.022	0.0153	0.0183	0.0118	0.0119	0.0118	0.0114	0.0084	0.0071	0.011	0.0095
TAG	TAG52:6FA20:5	Mol%	0.0319	0.014	0.0154	0.0182	0.0176	0.0148	0.0139	0.0226	0.0158	0.0198	0.02	0.0183	0.0266	0.0099	0.0139	0.019	0.0122	0.0081	0.0082	0.0163	0.0097
TAG	TAG52:6FA22:6	Mol%	0.0238	0.0136	0.0152	0.0176	0.0178	0.0399	0.0471	0.0536	0.0602	0.0429	0.0639	0.0409	0.0504	0.0317	0.0148	0.03	0.022	0.0205	0.0236	0.0302	0.0219
TAG	TAG52:7FA16:0	Mol%	0.0074	0.0069	0.0072	0.0043	0.0038	0.0043	0.0056	0.0052	0.0052	0.0036	0.0057	0.0038	0.0056	0.0052	0.0055	0.0046	0.0086	0.0046	0.0038	0.0039	0.0037
TAG	TAG52:7FA18:1	Mol%	0.0044	0.003	0.004	0.0021	0.0024	0.0039	0.0042	0.0049	0.0079	0.0036	0.0053	0.0033	0.0041	0.0038	0.0047	0.0032	0.0058	0.0028	0.003	0.0031	0.0026
TAG	TAG52:7FA20:5	Mol%	0.0109	0.0066	0.0082	0.0086	0.0087	0.0108	0.0104	0.0158	0.0159	0.0114	0.0153	0.0114	0.0161	0.0065	0.0083	0.0125	0.0076	0.0055	0.0054	0.0092	0.0063
TAG	TAG52:7FA22:6	Mol%	0.012	0.0068	0.0071	0.0081	0.0073	0.0186	0.0264	0.0262	0.0357	0.0232	0.0272	0.0187	0.0236	0.0156	0.007	0.015	0.0119	0.0083	0.0097	0.0138	0.0095
TAG	TAG52:8FA16:1	Mol%	0.0025	0.0016	0.0025	0.0013	0.0012	0.0012	0.001	0.0012	0.002	0.0016	0.0015	0.0013	0.0012	0.0012	0.0019	0.0009	0.0031	0.0013	0.0009	0.001	0.0007
TAG	TAG52:8FA18:2	Mol%	0.0062	0.0048	0.0075	0.0039	0.0034	0.0064	0.0083	0.0084	0.0132	0.0053	0.01	0.0062	0.0077	0.006	0.0067	0.0065	0.0069	0.0053	0.0052	0.005	0.0057
TAG	TAG53:0FA16:0	Mol%	0.0983	0.0742	0.0988	0.1019	0.0957	0.0789	0.1044	0.1062	0.0787	0.0874	0.0996	0.0907	0.1363	0.0733	0.0894	0.1286	0.0642	0.0619	0.0632	0.0941	0.0758
TAG	TAG53:1FA16:0	Mol%	0.0137	0.0094	0.011	0.0086	0.0094	0.009	0.013	0.0111	0.0109	0.0082	0.0111	0.0098	0.0123	0.0098	0.011	0.0098	0.0136	0.0095	0.0079	0.0083	0.008
TAG	TAG53:1FA17:0	Mol%	0.006	0.0037	0.0053	0.003	0.003	0.003	0.0034	0.0022	0.0031	0.0028	0.0031	0.0027	0.0022	0.0034	0.0055	0.0022	0.0078	0.003	0.0024	0.0022	0.0027
TAG	TAG53:1FA18:0	Mol%	0.0091	0.0057	0.0085	0.0039	0.0036	0.0031	0.0046	0.0025	0.0031	0.0027	0.0028	0.0025	0.0024	0.0034	0.0062	0.0031	0.0107	0.0043	0.0033	0.0018	0.0029
TAG	TAG53:1FA18:1	Mol%	0.0213	0.0114	0.0173	0.0104	0.0096	0.01	0.0115	0.0091	0.0106	0.0087	0.0092	0.0096	0.0085	0.0088	0.0184	0.0085	0.0218	0.012	0.0088	0.0081	0.009
TAG	TAG53:2FA16:0	Mol%	0.0301	0.0237	0.0236	0.0216	0.0209	0.0192	0.0296	0.0188	0.017	0.0199	0.0181	0.0202	0.019	0.0222	0.0253	0.0198	0.0251	0.0207	0.0194	0.0188	0.021
TAG	TAG53:2FA17:0	Mol%	0.0389	0.0317	0.0315	0.0268	0.025	0.0241	0.03	0.0192	0.023	0.0237	0.0256	0.0233	0.0187	0.0236	0.0318	0.0203	0.0327	0.024	0.021	0.018	0.0203
TAG	TAG53:2FA18:0	Mol%	0.0489	0.0312	0.0616	0.0275	0.0262	0.0079	0.0197	0.0074	0.0118	0.012	0.0089	0.0077	0.006	0.018	0.0539	0.0113	0.0846	0.0293	0.0267	0.0087	0.017
TAG	TAG53:2FA18:1	Mol%	0.1004	0.0733	0.0897	0.067	0.064	0.0555	0.0693	0.0448	0.0478	0.0568	0.0531	0.053	0.0429	0.0539	0.0891	0.0483	0.1005	0.0608	0.0525	0.045	0.0538
TAG	TAG53:2FA18:2	Mol%	0.0345	0.0193	0.032	0.0159	0.0162	0.0141	0.0219	0.0147	0.0183	0.0116	0.0164	0.0133	0.0148	0.0172	0.0279	0.0147	0.0343	0.0186	0.0151	0.0122	0.0161
TAG	TAG53:3FA16:0	Mol%	0.0242	0.0258	0.0297	0.0269	0.0269	0.0263	0.0353	0.0247	0.0226	0.0235	0.0255	0.0262	0.0259	0.0277	0.0302	0.0299	0.0277	0.0251	0.0277	0.0258	0.0302
TAG	TAG53:3FA17:0	Mol%	0.0648	0.0671	0.065	0.0559	0.0563	0.06	0.0719	0.0493	0.06	0.0504	0.065	0.054	0.0493	0.0568	0.0653	0.0557	0.0658	0.0558	0.0542	0.0466	0.0567
TAG	TAG53:3FA18:0	Mol%	0.7204	0.4145	1.0909	0.3988	0.4099	0.0496	0.2628	0.0593	0.1091	0.141	0.06	0.0561	0.0484	0.2468	0.8823	0.1492	1.3647	0.4637	0.417	0.0977	0.2473
TAG	TAG53:3FA18:1	Mol%	0.6157	0.3967	0.8855	0.3739	0.3787	0.1279	0.2715	0.1182	0.1665	0.2045	0.1402	0.1276	0.1064	0.2563	0.7014	0.1821	1.0748	0.4071	0.3773	0.1453	0.2548
TAG	TAG53:3FA18:2	Mol%	0.0877	0.0863	0.0946	0.0744	0.0727	0.0772	0.0957	0.0666	0.0729	0.0658	0.0782	0.073	0.0676	0.0761	0.0922	0.0746	0.096	0.0835	0.0704	0.0643	0.0775
TAG	TAG53:4FA16:0	Mol%	0.0084	0.0084	0.0094	0.0083	0.0084	0.0083	0.0083	0.0071	0.0065	0.0072	0.0078	0.0075	0.0079	0.0081	0.0083	0.0087	0.0082	0.008	0.0084	0.0078	0.01
TAG	TAG53:4FA17:0	Mol%	0.0357	0.0409	0.0468	0.0364	0.0381	0.0396	0.0519	0.0368	0.0415	0.0267	0.043	0.0359	0.0387	0.0398	0.0456	0.043	0.0382	0.0443	0.044	0.0323	0.043
TAG	TAG53:4FA18:0	Mol%	0.0908	0.0643	0.1481	0.0567	0.0561	0.0074	0.0348	0.0085	0.0153	0.0192	0.0087	0.0078	0.0067	0.0362	0.1213	0.0215	0.1786	0.0662	0.0603	0.0141	0.0334
TAG	TAG53:4FA18:1	Mol%	1.4221	0.9066	2.1831	0.8399	0.8784	0.1515	0.5524	0.1665	0.2693	0.3466	0.184	0.1622	0.1394	0.5528	1.8561	0.3395	2.7049	0.959	0.9305	0.2415	0.5645
TAG	TAG53:4FA18:2	Mol%	0.1254	0.1214	0.164	0.1213	0.1195	0.1147	0.127	0.1035	0.122	0.1125	0.1345	0.1113	0.1048	0.1117	0.1491	0.1156	0.1578	0.131	0.1291	0.1004	0.1267
TAG	TAG53:4FA18:3	Mol%	0.0089	0.0066	0.0084	0.0062	0.006	0.006	0.0048	0.0055	0.0059	0.0047	0.0071	0.0057	0.0056	0.005	0.0076	0.0058	0.0092	0.0069	0.0054	0.0052	0.0059
TAG	TAG53:4FA20:4	Mol%	0.0031	0.0018	0.0022	0.0014	0.0014	0.0011	0.002	0.0011	0.0016	0.0014	0.0012	0.0011	0.0014	0.0015	0.0033	0.0011	0.003	0.0015	0.0011	0.0008	0.0014
TAG	TAG53:5FA18:1	Mol%	0.7595	0.4877	1.2047	0.4388	0.457	0.0635	0.2712	0.074	0.1292	0.1595	0.0768	0.0669	0.06	0.2813	0.9884	0.1729	1.4502	0.4781	0.4769	0.1194	0.2809
TAG	TAG53:5FA18:2	Mol%	0.9441	0.6243	1.4975	0.585	0.6134	0.123	0.367	0.1351	0.2141	0.2464	0.1611	0.134	0.126	0.3909	1.2095	0.2657	1.7992	0.626	0.6102	0.187	0.3971
TAG	TAG53:5FA18:3	Mol%	0.0215	0.0142	0.0232	0.0145	0.0137	0.0094	0.0092	0.01	0.0127	0.0112	0.0148	0.0105	0.0101	0.0102	0.02	0.0113	0.027	0.0123	0.0134	0.0095	0.0119
TAG	TAG53:5FA20:4	Mol%	0.0066	0.0042	0.0044	0.0037	0.0036	0.0032	0.0038	0.0025	0.0032	0.0063	0.0038	0.0028	0.0033	0.0029	0.0045	0.0025	0.0056	0.003	0.0025	0.0025	0.0025
TAG	TAG53:6FA18:1	Mol%	0.2158	0.1425	0.3643	0.1254	0.1347	0.0184	0.0841	0.0202	0.0359	0.0476	0.0227	0.0194	0.0175	0.083	0.2796	0.0522	0.4467	0.1445	0.1404	0.0344	0.0828
TAG	TAG53:6FA18:2	Mol%	0.1178	0.0836	0.184	0.0735	0.0769	0.0189	0.0482	0.0222	0.0324	0.0356	0.0293	0.0195	0.0198	0.0505	0.1535	0.0373	0.2272	0.0788	0.0845	0.0287	0.0513
TAG	TAG53:6FA18:3	Mol%	0.2194	0.1477	0.3594	0.1369	0.1425	0.0231	0.0867	0.0261	0.0415	0.0526	0.0301	0.0238	0.0223	0.0857	0.3002	0.057	0.4633	0.1509	0.1493	0.0392	0.091
TAG	TAG53:6FA20:4	Mol%	0.0054	0.0041	0.0059	0.0042	0.0039	0.0036	0.0054	0.0031	0.0048	0.0057	0.0039	0.0034	0.0039	0.003	0.0051	0.0035	0.0044	0.0033	0.0024	0.0027	0.0031
TAG	TAG53:7FA18:3	Mol%	0.0264	0.019	0.0432	0.0152	0.0161	0.0026	0.01	0.0031	0.0059	0.0059	0.004	0.003	0.0027	0.0103	0.035	0.0068	0.0544	0.0183	0.0176	0.0044	0.0105
TAG	TAG54:0FA16:0	Mol%	0.0172	0.0111	0.0131	0.0128	0.0118	0.0091	0.01	0.0087	0.0065	0.0079	0.0079	0.0097	0.0116	0.0098	0.0109	0.0127	0.0114	0.0121	0.0121	0.0114	0.0133
TAG	TAG54:0FA18:0	Mol%	0.0058	0.0053	0.006	0.003	0.0028	0.0015	0.0034	0.0014	0.002	0.0022	0.0013	0.0016	0.0011	0.0033	0.0045	0.0018	0.0078	0.0028	0.003	0.0016	0.0015
TAG	TAG54:1FA16:0	Mol%	0.04	0.0198	0.0255	0.019	0.0171	0.013	0.0201	0.012	0.0143	0.0259	0.013	0.018	0.0114	0.0205	0.0246	0.0116	0.0294	0.0194	0.0154	0.0146	0.0138
TAG	TAG54:1FA18:0	Mol%	0.0267	0.0215	0.0251	0.0164	0.0165	0.0207	0.0217	0.0162	0.0176	0.0162	0.0156	0.0173	0.0108	0.0198	0.0235	0.0123	0.0261	0.0194	0.0163	0.0126	0.013
TAG	TAG54:1FA18:1	Mol%	0.0489	0.0338	0.0414	0.0275	0.0295	0.0265	0.0305	0.0215	0.0257	0.0325	0.0217	0.0265	0.0164	0.0315	0.0418	0.0186	0.0493	0.0317	0.0262	0.0223	0.0221
TAG	TAG54:1FA20:0	Mol%	0.0517	0.0233	0.0351	0.028	0.0267	0.0237	0.0263	0.0205	0.0193	0.0307	0.0223	0.0276	0.0212	0.0329	0.037	0.0208	0.0343	0.0255	0.0316	0.0254	0.027
TAG	TAG54:1FA20:1	Mol%	0.0161	0.0087	0.0093	0.0083	0.0092	0.0068	0.0089	0.0067	0.0057	0.0121	0.0056	0.0081	0.0059	0.0082	0.0106	0.0069	0.0115	0.0071	0.0072	0.0075	0.0071
TAG	TAG54:2FA16:0	Mol%	0.1482	0.1009	0.0934	0.0869	0.0883	0.0662	0.1052	0.0665	0.0682	0.138	0.0691	0.0904	0.0606	0.0907	0.1026	0.0653	0.1049	0.085	0.0731	0.0797	0.0739
TAG	TAG54:2FA18:0	Mol%	0.1575	0.1641	0.1559	0.1254	0.122	0.164	0.1443	0.1213	0.136	0.1285	0.121	0.1319	0.0872	0.1424	0.1668	0.0917	0.1653	0.1272	0.125	0.097	0.1013
TAG	TAG54:2FA18:1	Mol%	0.3691	0.3436	0.2946	0.2796	0.2839	0.368	0.3011	0.2765	0.3082	0.3666	0.27	0.33	0.2047	0.2994	0.3204	0.2152	0.3255	0.2845	0.2621	0.2615	0.2343
TAG	TAG54:2FA18:2	Mol%	0.0634	0.0507	0.0641	0.041	0.0425	0.0473	0.0583	0.04	0.048	0.0493	0.0427	0.0486	0.034	0.0586	0.066	0.036	0.0624	0.0525	0.0465	0.0391	0.0397
TAG	TAG54:2FA20:0	Mol%	0.0604	0.0385	0.0585	0.0424	0.0417	0.0375	0.0533	0.0365	0.043	0.0564	0.0424	0.0481	0.0371	0.0555	0.0601	0.0384	0.0507	0.047	0.0532	0.043	0.0453
TAG	TAG54:2FA20:1	Mol%	0.1643	0.0948	0.1007	0.0968	0.1017	0.0737	0.0997	0.0754	0.0629	0.14	0.0702	0.0914	0.0713	0.0886	0.1116	0.0758	0.112	0.0865	0.077	0.0888	0.0815
TAG	TAG54:2FA20:2	Mol%	0.0097	0.0059	0.0071	0.0065	0.0062	0.005	0.0068	0.0048	0.0047	0.0092	0.0054	0.0064	0.0043	0.005	0.0067	0.0043	0.0076	0.0057	0.0051	0.005	0.0049
TAG	TAG54:3FA16:0	Mol%	0.2194	0.1755	0.1826	0.1657	0.1607	0.1292	0.1877	0.1394	0.1322	0.2543	0.1452	0.1673	0.1353	0.1687	0.1847	0.1377	0.1794	0.1697	0.1462	0.152	0.1514
TAG	TAG54:3FA16:1	Mol%	0.0249	0.0153	0.0135	0.0135	0.013	0.0126	0.014	0.0136	0.0204	0.0443	0.0164	0.0194	0.0102	0.0138	0.0142	0.0091	0.0151	0.0101	0.0092	0.0136	0.0106
TAG	TAG54:3FA18:0	Mol%	0.349	0.3773	0.3949	0.3223	0.3189	0.4032	0.3409	0.3199	0.3597	0.2651	0.312	0.3327	0.2472	0.3642	0.4085	0.2828	0.3949	0.3764	0.3703	0.2651	0.3009
TAG	TAG54:3FA18:1	Mol%	1.8037	2.0294	1.5266	1.69	1.6286	2.3072	1.6988	1.8305	2.1072	2.4391	1.7921	2.109	1.3642	1.9177	1.7869	1.3533	1.8282	1.6246	1.6496	1.6722	1.5819
TAG	TAG54:3FA18:2	Mol%	0.4107	0.4704	0.4956	0.4102	0.3867	0.5036	0.4731	0.4401	0.4703	0.4273	0.4126	0.4574	0.3361	0.4857	0.4845	0.3839	0.4515	0.4843	0.4647	0.3965	0.4075
TAG	TAG54:3FA18:3	Mol%	0.0073	0.0059	0.0088	0.0053	0.0049	0.004	0.0037	0.0035	0.0045	0.0036	0.0043	0.0037	0.0028	0.0051	0.0091	0.0035	0.0107	0.0054	0.005	0.0035	0.0039
TAG	TAG54:3FA20:1	Mol%	0.1932	0.1703	0.1749	0.1602	0.1604	0.1223	0.1844	0.1431	0.1353	0.2554	0.1431	0.1618	0.1337	0.1694	0.1824	0.1487	0.165	0.162	0.1433	0.162	0.1611
TAG	TAG54:3FA20:2	Mol%	0.1049	0.068	0.0702	0.0667	0.0679	0.0511	0.0615	0.0478	0.0503	0.1055	0.0577	0.0641	0.0502	0.0575	0.061	0.0478	0.0686	0.0625	0.0504	0.0572	0.0547
TAG	TAG54:3FA20:3	Mol%	0.0185	0.012	0.0134	0.012	0.0112	0.0078	0.0088	0.0078	0.0074	0.0136	0.008	0.0089	0.0076	0.0097	0.0129	0.0078	0.0111	0.0107	0.0079	0.0083	0.0091
TAG	TAG54:4FA16:0	Mol%	0.1921	0.1492	0.1509	0.1561	0.157	0.1088	0.1382	0.1142	0.1281	0.202	0.1387	0.1359	0.1214	0.1333	0.16	0.1122	0.1413	0.1499	0.1266	0.128	0.1329
TAG	TAG54:4FA16:1	Mol%	0.0269	0.0254	0.0211	0.0225	0.0236	0.0232	0.0231	0.0242	0.0398	0.0749	0.0322	0.032	0.0205	0.0228	0.0204	0.0175	0.0219	0.0184	0.014	0.0241	0.0199
TAG	TAG54:4FA18:0	Mol%	0.1892	0.2416	0.2996	0.227	0.2177	0.2559	0.2701	0.24	0.2447	0.1462	0.2339	0.2301	0.1985	0.2803	0.2708	0.2284	0.2645	0.2919	0.2923	0.2041	0.2513
TAG	TAG54:4FA18:1	Mol%	2.4136	3.6071	2.7621	3.1487	3.0317	4.1865	3.5449	3.7519	4.4714	3.9978	3.7077	4.0082	3.0398	3.9017	3.1224	2.9937	3.1408	3.4262	3.5423	3.4225	3.4826
TAG	TAG54:4FA18:2	Mol%	1.3899	2.0635	1.6824	1.7529	1.7167	2.543	2.1294	2.2807	2.5696	2.188	2.1589	2.3675	1.7676	2.3481	1.8751	1.865	1.8464	2.0821	2.1199	2.0136	2.1033
TAG	TAG54:4FA18:3	Mol%	0.0423	0.0443	0.0393	0.0391	0.0349	0.0495	0.0338	0.0432	0.0473	0.0383	0.0482	0.0469	0.0383	0.0403	0.0397	0.0368	0.0328	0.0396	0.0377	0.0388	0.0391
TAG	TAG54:4FA20:1	Mol%	0.0296	0.0258	0.0229	0.0237	0.0235	0.0237	0.0252	0.0297	0.0408	0.0728	0.0371	0.0345	0.0244	0.0234	0.0218	0.022	0.0249	0.0208	0.0192	0.0282	0.0237
TAG	TAG54:4FA20:2	Mol%	0.1079	0.0923	0.1067	0.0973	0.0917	0.0796	0.102	0.0895	0.0968	0.1644	0.1162	0.1033	0.0854	0.0919	0.0994	0.0824	0.0998	0.0994	0.0834	0.0905	0.0899
TAG	TAG54:4FA20:3	Mol%	0.1666	0.1125	0.1038	0.1134	0.1123	0.0683	0.077	0.0659	0.0716	0.1334	0.0827	0.081	0.0719	0.084	0.114	0.0695	0.0923	0.0915	0.0705	0.0798	0.0767
TAG	TAG54:4FA20:4	Mol%	0.0473	0.0331	0.0378	0.0352	0.0325	0.0305	0.0524	0.0312	0.0254	0.0406	0.0268	0.0314	0.0326	0.0337	0.0359	0.0311	0.0373	0.0298	0.0285	0.0263	0.0279
TAG	TAG54:4FA22:1	Mol%	0.0072	0.0084	0.0077	0.0079	0.0087	0.0118	0.0096	0.0109	0.0126	0.0111	0.011	0.0115	0.0088	0.0102	0.0075	0.0086	0.0084	0.0097	0.0096	0.0097	0.0097
TAG	TAG54:4FA22:4	Mol%	0.0046	0.003	0.0026	0.0035	0.0031	0.0031	0.0033	0.0032	0.0026	0.0041	0.0027	0.003	0.0032	0.0032	0.0033	0.0029	0.0047	0.0033	0.0033	0.0026	0.0028
TAG	TAG54:5FA16:0	Mol%	0.2021	0.1643	0.1731	0.1829	0.1767	0.1377	0.1611	0.1433	0.1467	0.2049	0.17	0.1533	0.1649	0.1445	0.1731	0.1452	0.1511	0.163	0.1303	0.148	0.1432
TAG	TAG54:5FA16:1	Mol%	0.0243	0.0251	0.0169	0.0214	0.0209	0.0217	0.0182	0.0235	0.0376	0.0631	0.0326	0.026	0.0212	0.0193	0.0179	0.0165	0.0225	0.0173	0.0158	0.0214	0.0184
TAG	TAG54:5FA18:0	Mol%	0.0285	0.0287	0.0332	0.0295	0.0298	0.0372	0.0257	0.0369	0.0386	0.0264	0.0401	0.0327	0.0333	0.0274	0.0319	0.0311	0.0287	0.033	0.0311	0.0285	0.028
TAG	TAG54:5FA18:1	Mol%	1.1485	1.9167	1.6007	1.7273	1.6497	2.8554	2.1594	2.653	3.0152	2.1504	2.5164	2.5466	2.1972	2.4369	1.7343	2.1313	1.6989	2.2958	2.5296	2.3149	2.4042
TAG	TAG54:5FA18:2	Mol%	1.5926	2.8739	2.5864	2.5405	2.5433	4.1336	3.452	3.9089	4.589	3.1339	3.6619	3.8115	3.3116	3.8533	2.7052	3.3287	2.6264	3.8211	4.1088	3.5345	3.7871
TAG	TAG54:5FA18:3	Mol%	0.1945	0.2137	0.1926	0.2044	0.198	0.2882	0.1702	0.2686	0.293	0.2453	0.2886	0.273	0.251	0.2114	0.1852	0.2132	0.1668	0.2125	0.2233	0.2489	0.2248
TAG	TAG54:5FA20:2	Mol%	0.0164	0.0175	0.0158	0.0177	0.0163	0.0184	0.0168	0.0199	0.03	0.0476	0.0274	0.0232	0.0187	0.0164	0.0154	0.015	0.0159	0.0167	0.014	0.0184	0.018
TAG	TAG54:5FA20:3	Mol%	0.1756	0.1498	0.1632	0.1724	0.1684	0.1124	0.1303	0.1157	0.1363	0.209	0.156	0.1333	0.1263	0.1327	0.155	0.125	0.1357	0.151	0.119	0.1311	0.1365
TAG	TAG54:5FA20:4	Mol%	0.3214	0.1987	0.216	0.2261	0.2281	0.1714	0.261	0.161	0.1465	0.2646	0.1593	0.1768	0.2	0.1898	0.2212	0.1744	0.2078	0.1647	0.1334	0.1615	0.1612
TAG	TAG54:5FA20:5	Mol%	0.0273	0.0133	0.0171	0.0175	0.0182	0.0135	0.0213	0.0156	0.0091	0.0109	0.0118	0.014	0.02	0.0124	0.0169	0.0178	0.0134	0.0104	0.0111	0.0144	0.0127
TAG	TAG54:5FA22:1	Mol%	0.0085	0.0141	0.0127	0.0138	0.0132	0.0211	0.0165	0.0221	0.0247	0.0169	0.0209	0.0201	0.0182	0.0189	0.0115	0.0171	0.0134	0.0185	0.0195	0.0194	0.021
TAG	TAG54:5FA22:4	Mol%	0.0061	0.0038	0.0026	0.0039	0.0041	0.0043	0.0036	0.0038	0.004	0.0079	0.0037	0.0041	0.0044	0.0034	0.0034	0.0032	0.0051	0.0029	0.0018	0.0034	0.0031
TAG	TAG54:5FA22:5	Mol%	0.0277	0.0224	0.0196	0.0233	0.0226	0.0271	0.0324	0.0353	0.0285	0.0307	0.0339	0.0303	0.0357	0.0268	0.0213	0.0302	0.0226	0.0258	0.0269	0.0285	0.0283
TAG	TAG54:6FA16:0	Mol%	0.1891	0.1426	0.1694	0.1686	0.1656	0.1729	0.243	0.1909	0.1763	0.1958	0.2084	0.1814	0.234	0.1647	0.156	0.1954	0.1451	0.1429	0.1329	0.1693	0.1556
TAG	TAG54:6FA16:1	Mol%	0.0297	0.0235	0.0189	0.0231	0.025	0.0263	0.0205	0.0291	0.0416	0.0673	0.0415	0.0319	0.0313	0.0204	0.0201	0.0225	0.0204	0.0183	0.0169	0.0274	0.0215
TAG	TAG54:6FA18:1	Mol%	0.2695	0.3033	0.2761	0.3303	0.3324	0.4537	0.2701	0.4843	0.5297	0.3941	0.5294	0.4534	0.4851	0.3172	0.2757	0.3966	0.2336	0.3232	0.3449	0.4334	0.393
TAG	TAG54:6FA18:2	Mol%	0.7503	1.451	1.4763	1.4033	1.4846	2.556	2.171	2.7486	3.3783	1.7436	2.5307	2.405	2.373	2.3791	1.4842	2.2814	1.4381	2.4846	2.8695	2.3144	2.7378
TAG	TAG54:6FA18:3	Mol%	0.2486	0.318	0.2781	0.3276	0.329	0.4594	0.256	0.4995	0.5657	0.3652	0.5486	0.4562	0.4962	0.3253	0.2812	0.4191	0.2369	0.3487	0.3674	0.455	0.4168
TAG	TAG54:6FA20:3	Mol%	0.0251	0.0232	0.0195	0.0239	0.0238	0.023	0.0189	0.0263	0.04	0.0574	0.0391	0.0287	0.0252	0.0183	0.0206	0.0197	0.0191	0.0209	0.0183	0.0244	0.0211
TAG	TAG54:6FA20:4	Mol%	0.3996	0.3034	0.3825	0.359	0.3726	0.2979	0.523	0.2867	0.2761	0.4417	0.296	0.3029	0.3832	0.3525	0.3613	0.3574	0.3161	0.2855	0.252	0.2738	0.3008
TAG	TAG54:6FA20:5	Mol%	0.2701	0.1428	0.173	0.1971	0.1947	0.1397	0.2002	0.1713	0.0958	0.1272	0.128	0.1568	0.2202	0.1373	0.1766	0.2143	0.1371	0.1134	0.1149	0.1675	0.1384
TAG	TAG54:6FA22:5	Mol%	0.0389	0.023	0.0184	0.0285	0.0273	0.0277	0.0281	0.0355	0.0336	0.041	0.0363	0.0317	0.0367	0.0234	0.0202	0.0304	0.0216	0.0183	0.0203	0.031	0.0258
TAG	TAG54:6FA22:6	Mol%	0.1397	0.1323	0.1109	0.1282	0.1261	0.1938	0.2588	0.2361	0.2452	0.2033	0.2704	0.1981	0.2414	0.1898	0.1155	0.2029	0.1404	0.1649	0.1758	0.1668	0.171
TAG	TAG54:7FA16:1	Mol%	0.044	0.0234	0.0233	0.0281	0.0291	0.0337	0.0305	0.0439	0.0533	0.0712	0.0539	0.0412	0.0459	0.0242	0.0221	0.0323	0.0258	0.0201	0.0199	0.0343	0.025
TAG	TAG54:7FA18:1	Mol%	0.0434	0.0337	0.0292	0.0344	0.0367	0.0459	0.0282	0.0521	0.0613	0.0399	0.0563	0.0429	0.053	0.0338	0.0278	0.0448	0.0263	0.033	0.0324	0.0452	0.0359
TAG	TAG54:7FA18:2	Mol%	0.2307	0.305	0.3207	0.3424	0.3503	0.4567	0.2753	0.5648	0.5656	0.3316	0.561	0.4479	0.5909	0.3183	0.278	0.5372	0.2208	0.365	0.4112	0.4899	0.4595
TAG	TAG54:7FA18:3	Mol%	0.1177	0.1661	0.1701	0.199	0.1992	0.2787	0.1442	0.3319	0.3493	0.1833	0.3449	0.2651	0.3423	0.1931	0.1566	0.2988	0.1402	0.2311	0.2436	0.2959	0.2776
TAG	TAG54:7FA20:4	Mol%	0.0508	0.0398	0.0381	0.0447	0.0438	0.0484	0.0442	0.0496	0.0767	0.1128	0.065	0.0498	0.0573	0.0348	0.0415	0.0435	0.0329	0.0299	0.028	0.0419	0.0328
TAG	TAG54:7FA20:5	Mol%	0.3509	0.2561	0.3688	0.3749	0.3627	0.282	0.3947	0.3714	0.2189	0.2329	0.2741	0.2987	0.4761	0.2407	0.3276	0.4799	0.2326	0.2001	0.2211	0.3123	0.2706
TAG	TAG54:7FA22:5	Mol%	0.0171	0.0122	0.0115	0.0158	0.0139	0.0188	0.0239	0.0252	0.0311	0.0249	0.0242	0.0194	0.0246	0.0156	0.0119	0.0215	0.0131	0.0156	0.0153	0.018	0.0169
TAG	TAG54:7FA22:6	Mol%	0.2488	0.136	0.1108	0.1654	0.1589	0.1773	0.1941	0.2226	0.2672	0.3059	0.2502	0.1921	0.2355	0.1411	0.1199	0.1788	0.1571	0.1283	0.1288	0.1952	0.142
TAG	TAG54:8FA18:2	Mol%	0.0353	0.0313	0.0353	0.039	0.0405	0.0454	0.0405	0.06	0.0739	0.0439	0.0617	0.0454	0.0619	0.0365	0.0316	0.0569	0.0296	0.0399	0.0403	0.0505	0.0438
TAG	TAG54:8FA18:3	Mol%	0.0238	0.028	0.0263	0.0326	0.0324	0.0367	0.0139	0.0493	0.0479	0.0274	0.057	0.0391	0.0595	0.0208	0.0222	0.0431	0.0173	0.0271	0.0296	0.0414	0.0352
TAG	TAG54:8FA20:4	Mol%	0.0046	0.0039	0.0044	0.0033	0.0037	0.0055	0.0048	0.0058	0.0116	0.0112	0.0081	0.0057	0.0066	0.0039	0.0043	0.0046	0.005	0.0036	0.004	0.0042	0.0038
TAG	TAG54:8FA20:5	Mol%	0.0469	0.0286	0.0377	0.0373	0.0374	0.0373	0.0361	0.056	0.0506	0.053	0.0559	0.0447	0.065	0.024	0.0319	0.0555	0.0235	0.0198	0.0225	0.0416	0.0295
TAG	TAG54:8FA22:6	Mol%	0.1062	0.0739	0.0733	0.0817	0.0809	0.099	0.1451	0.1332	0.2264	0.1673	0.1553	0.1051	0.1316	0.1124	0.0664	0.1285	0.0817	0.0897	0.1045	0.1021	0.0996
TAG	TAG55:1FA16:0	Mol%	0.4274	0.409	0.5237	0.5006	0.5046	0.3206	0.6744	0.4374	0.3985	0.4034	0.3581	0.3636	0.5099	0.5538	0.4358	0.6743	0.4915	0.5514	0.6223	0.4989	0.5794
TAG	TAG55:1FA18:1	Mol%	0.0711	0.0587	0.0608	0.0569	0.0605	0.0665	0.0837	0.0835	0.0814	0.0941	0.071	0.0728	0.0761	0.0703	0.0556	0.0795	0.0655	0.0526	0.0614	0.0711	0.0623
TAG	TAG55:2FA18:1	Mol%	0.0142	0.0117	0.0154	0.0088	0.0107	0.0109	0.0129	0.0123	0.0165	0.0131	0.0113	0.0111	0.0105	0.0136	0.0135	0.0103	0.0158	0.0112	0.0107	0.0099	0.0108
TAG	TAG55:2FA18:2	Mol%	0.0666	0.0642	0.0716	0.0704	0.0726	0.0804	0.1113	0.1096	0.1224	0.104	0.0935	0.0892	0.1116	0.0897	0.065	0.115	0.0663	0.0735	0.0843	0.094	0.0923
TAG	TAG55:3FA18:1	Mol%	0.0184	0.0179	0.0173	0.0139	0.0161	0.0176	0.0207	0.015	0.02	0.0207	0.0157	0.0167	0.0109	0.02	0.0209	0.0137	0.0255	0.0169	0.016	0.0127	0.016
TAG	TAG55:3FA18:2	Mol%	0.0183	0.0151	0.02	0.0131	0.0133	0.0136	0.0182	0.0159	0.0241	0.0155	0.0159	0.0136	0.0149	0.0171	0.0207	0.0171	0.0231	0.017	0.0166	0.0131	0.0161
TAG	TAG55:4FA18:1	Mol%	0.012	0.0177	0.0152	0.0136	0.0146	0.02	0.0208	0.0178	0.0249	0.0208	0.019	0.0187	0.0133	0.0215	0.0171	0.0154	0.02	0.017	0.0186	0.015	0.0176
TAG	TAG55:4FA18:2	Mol%	0.0155	0.0198	0.0211	0.0167	0.0163	0.0215	0.0269	0.0194	0.0268	0.0205	0.0189	0.0203	0.0156	0.0255	0.0225	0.0199	0.0255	0.0225	0.0242	0.017	0.022
TAG	TAG55:5FA18:1	Mol%	0.0095	0.0092	0.0117	0.0081	0.0082	0.0075	0.008	0.007	0.0093	0.0081	0.0071	0.0066	0.0056	0.0078	0.0102	0.0066	0.0166	0.0085	0.0096	0.0064	0.0074
TAG	TAG55:5FA18:2	Mol%	0.0098	0.0162	0.018	0.014	0.0141	0.0213	0.0241	0.0213	0.03	0.018	0.0227	0.0205	0.0163	0.0233	0.0173	0.0195	0.0175	0.0212	0.0229	0.0171	0.0216
TAG	TAG55:5FA20:4	Mol%	0.0059	0.0036	0.0048	0.0038	0.0035	0.0028	0.0049	0.0025	0.0037	0.0053	0.0029	0.0027	0.003	0.003	0.004	0.0029	0.0056	0.0029	0.0025	0.0023	0.0027
TAG	TAG55:6FA18:1	Mol%	0.1044	0.0687	0.155	0.0628	0.064	0.0125	0.0398	0.0134	0.0177	0.0246	0.0124	0.0131	0.0126	0.0432	0.1366	0.027	0.1969	0.0685	0.0635	0.0201	0.0416
TAG	TAG55:6FA20:3	Mol%	0.1754	0.1147	0.2806	0.1035	0.1043	0.0136	0.0649	0.0159	0.0269	0.039	0.0163	0.014	0.0127	0.0688	0.2306	0.0395	0.3416	0.109	0.1107	0.0273	0.0599
TAG	TAG55:6FA20:4	Mol%	0.0159	0.0105	0.0184	0.0105	0.0109	0.0048	0.011	0.0041	0.0069	0.0097	0.0058	0.0049	0.0051	0.0085	0.0186	0.0059	0.0234	0.01	0.0099	0.0045	0.0069
TAG	TAG55:7FA15:0	Mol%	0.0114	0.0058	0.0085	0.0061	0.0063	0.0042	0.0067	0.0042	0.0041	0.0057	0.0042	0.0042	0.0045	0.0058	0.0073	0.0053	0.0136	0.006	0.0056	0.0044	0.0055
TAG	TAG55:7FA18:1	Mol%	0.0649	0.0378	0.0949	0.0374	0.0384	0.0084	0.0252	0.0097	0.0134	0.0177	0.0092	0.0087	0.0081	0.0266	0.0829	0.0163	0.1116	0.042	0.0418	0.0121	0.0253
TAG	TAG55:7FA20:3	Mol%	0.0232	0.0149	0.0363	0.014	0.0126	0.0015	0.008	0.0021	0.0036	0.0051	0.0025	0.0019	0.0017	0.0089	0.0294	0.0056	0.045	0.0141	0.0152	0.0036	0.0078
TAG	TAG55:7FA20:4	Mol%	0.2649	0.1597	0.4	0.1546	0.1583	0.02	0.0985	0.0248	0.0415	0.0584	0.025	0.0225	0.0195	0.0979	0.3387	0.058	0.5187	0.1717	0.1697	0.0398	0.0966
TAG	TAG55:7FA22:6	Mol%	0.0494	0.0271	0.0306	0.028	0.0296	0.0232	0.039	0.0235	0.0309	0.0371	0.031	0.0255	0.0279	0.0274	0.0282	0.0303	0.0417	0.0269	0.027	0.0256	0.0288
TAG	TAG55:8FA20:4	Mol%	0.0364	0.0205	0.0509	0.0185	0.0193	0.0023	0.011	0.0032	0.006	0.0073	0.0033	0.0032	0.0026	0.0127	0.0407	0.008	0.0647	0.0205	0.0185	0.0052	0.0124
TAG	TAG56:1FA16:0	Mol%	0.0064	0.0026	0.0033	0.0019	0.0023	0.0014	0.0032	0.0013	0.0018	0.0046	0.0015	0.0021	0.0015	0.0031	0.0026	0.0018	0.0036	0.0022	0.0022	0.0021	0.002
TAG	TAG56:1FA18:1	Mol%	0.0144	0.01	0.0109	0.0083	0.0086	0.007	0.009	0.0073	0.009	0.0114	0.0068	0.0077	0.0064	0.0107	0.0099	0.0076	0.0122	0.0098	0.0099	0.0075	0.0093
TAG	TAG56:10FA18:2	Mol%	0.0149	0.0115	0.0151	0.0114	0.0109	0.0109	0.0149	0.0136	0.0202	0.012	0.0136	0.0112	0.0126	0.0142	0.0157	0.0147	0.0169	0.0117	0.0136	0.0107	0.014
TAG	TAG56:2FA16:0	Mol%	0.0176	0.0072	0.0078	0.0066	0.0068	0.0044	0.0107	0.0052	0.008	0.0224	0.0054	0.0084	0.0049	0.009	0.01	0.004	0.0097	0.0069	0.0055	0.0075	0.0063
TAG	TAG56:2FA18:0	Mol%	0.0109	0.009	0.0106	0.0073	0.0065	0.0071	0.0089	0.0055	0.0077	0.0112	0.005	0.0081	0.0035	0.0087	0.0106	0.0045	0.0103	0.0086	0.0067	0.0049	0.0056
TAG	TAG56:2FA18:1	Mol%	0.0905	0.0605	0.1079	0.0532	0.056	0.0272	0.0463	0.0248	0.0344	0.0623	0.0238	0.0345	0.0177	0.0513	0.0892	0.0262	0.1331	0.0548	0.0535	0.0293	0.0398
TAG	TAG56:2FA20:0	Mol%	0.0264	0.0214	0.0254	0.0188	0.0187	0.016	0.0179	0.0132	0.0189	0.026	0.0143	0.0191	0.0097	0.0225	0.0259	0.0116	0.0251	0.0182	0.0186	0.0144	0.0164
TAG	TAG56:2FA20:1	Mol%	0.0119	0.0116	0.0124	0.0092	0.0092	0.0091	0.0118	0.0088	0.0104	0.0178	0.0074	0.0108	0.0057	0.0098	0.0136	0.0069	0.0162	0.0105	0.0089	0.0082	0.0083
TAG	TAG56:3FA16:0	Mol%	0.0164	0.0078	0.0102	0.008	0.0078	0.0056	0.0121	0.0066	0.0107	0.0265	0.0088	0.0099	0.0068	0.0102	0.0098	0.005	0.013	0.009	0.0072	0.0088	0.0072
TAG	TAG56:3FA18:0	Mol%	0.0154	0.0121	0.016	0.0095	0.0103	0.009	0.0126	0.0084	0.0116	0.0156	0.0083	0.0097	0.0058	0.0129	0.017	0.0073	0.0159	0.0131	0.0108	0.0077	0.0091
TAG	TAG56:3FA18:1	Mol%	0.0898	0.0907	0.0829	0.0786	0.0774	0.0764	0.0798	0.0697	0.0867	0.1636	0.064	0.0958	0.0431	0.0871	0.0909	0.0504	0.1065	0.0777	0.0678	0.0684	0.0655
TAG	TAG56:3FA18:2	Mol%	0.0364	0.0349	0.0369	0.0307	0.0278	0.0249	0.0353	0.0236	0.035	0.0532	0.0241	0.0331	0.018	0.0373	0.0363	0.0196	0.0428	0.0317	0.0267	0.0264	0.0255
TAG	TAG56:3FA20:0	Mol%	0.0309	0.0348	0.0378	0.0288	0.0295	0.0258	0.0301	0.0236	0.0331	0.0374	0.0247	0.0306	0.0165	0.0353	0.0365	0.0207	0.0362	0.0326	0.0334	0.0252	0.0275
TAG	TAG56:3FA20:1	Mol%	0.0521	0.0548	0.0516	0.0478	0.0487	0.0494	0.0517	0.045	0.054	0.0972	0.0391	0.0605	0.0279	0.0535	0.0553	0.0326	0.0692	0.0456	0.0423	0.0435	0.0411
TAG	TAG56:3FA20:2	Mol%	0.0053	0.0057	0.0055	0.0048	0.0042	0.0041	0.005	0.0036	0.0053	0.0093	0.0039	0.005	0.0027	0.0053	0.0063	0.0028	0.0067	0.0051	0.004	0.0033	0.004
TAG	TAG56:4FA16:0	Mol%	0.0105	0.0063	0.0066	0.006	0.0061	0.0051	0.0081	0.0055	0.0068	0.0151	0.0064	0.007	0.0061	0.0065	0.0061	0.0039	0.0088	0.0066	0.0052	0.0059	0.006
TAG	TAG56:4FA18:0	Mol%	0.0275	0.0219	0.0304	0.0207	0.0209	0.0134	0.0175	0.0121	0.0137	0.0178	0.0112	0.0143	0.0112	0.018	0.0284	0.0125	0.0315	0.0217	0.0177	0.0121	0.0151
TAG	TAG56:4FA18:1	Mol%	0.1059	0.1379	0.1176	0.1128	0.1107	0.123	0.131	0.1173	0.1506	0.2348	0.114	0.1445	0.0814	0.138	0.1237	0.0882	0.1471	0.1197	0.117	0.1073	0.1158
TAG	TAG56:4FA18:2	Mol%	0.0776	0.105	0.1046	0.0834	0.0826	0.0954	0.112	0.0929	0.1222	0.1645	0.0861	0.1172	0.0628	0.1218	0.0979	0.073	0.1096	0.107	0.1028	0.0876	0.0889
TAG	TAG56:4FA20:1	Mol%	0.0829	0.1141	0.1051	0.0933	0.0938	0.1059	0.1153	0.1064	0.1346	0.184	0.0973	0.1266	0.0706	0.1278	0.1065	0.0829	0.1206	0.1085	0.1076	0.0989	0.1011
TAG	TAG56:4FA20:2	Mol%	0.0292	0.0293	0.0266	0.0238	0.0247	0.0281	0.0254	0.0253	0.0374	0.0567	0.0272	0.0311	0.0159	0.0275	0.0272	0.0175	0.0319	0.0256	0.0248	0.0207	0.0236
TAG	TAG56:4FA20:3	Mol%	0.02	0.0144	0.0164	0.0151	0.0143	0.0097	0.0094	0.0093	0.0104	0.0155	0.0082	0.0102	0.0078	0.0119	0.0175	0.0092	0.0177	0.0146	0.011	0.0099	0.0111
TAG	TAG56:4FA20:4	Mol%	0.01	0.0073	0.0097	0.0063	0.0078	0.0071	0.0103	0.0062	0.0051	0.0069	0.0044	0.006	0.0059	0.0081	0.0114	0.0058	0.0096	0.0076	0.0064	0.0056	0.0058
TAG	TAG56:4FA22:4	Mol%	0.0043	0.0027	0.0027	0.0034	0.003	0.0029	0.0034	0.0024	0.002	0.0041	0.0017	0.0029	0.0026	0.0025	0.0029	0.0023	0.0034	0.0022	0.0026	0.0027	0.0026
TAG	TAG56:5FA16:0	Mol%	0.0379	0.0301	0.0216	0.0312	0.0288	0.0277	0.0327	0.027	0.0196	0.039	0.022	0.0292	0.0275	0.0245	0.0248	0.0288	0.0258	0.0241	0.0223	0.027	0.0263
TAG	TAG56:5FA18:0	Mol%	0.0391	0.0364	0.0428	0.0362	0.0364	0.0294	0.0337	0.0265	0.0237	0.0317	0.0212	0.0257	0.0249	0.0324	0.0419	0.0288	0.0412	0.0347	0.0315	0.0266	0.0306
TAG	TAG56:5FA18:1	Mol%	0.1282	0.1347	0.1151	0.128	0.1225	0.1263	0.1193	0.1177	0.1492	0.2409	0.1214	0.1386	0.0943	0.1274	0.1214	0.0949	0.1493	0.1254	0.1104	0.1077	0.1134
TAG	TAG56:5FA18:2	Mol%	0.0913	0.1384	0.1383	0.1237	0.1195	0.1363	0.1642	0.1458	0.19	0.2232	0.1408	0.1653	0.105	0.1727	0.1357	0.1197	0.1596	0.1702	0.1488	0.1239	0.1438
TAG	TAG56:5FA20:1	Mol%	0.043	0.0681	0.0679	0.0586	0.0572	0.0687	0.0866	0.0783	0.0975	0.1049	0.0723	0.085	0.0552	0.0901	0.0693	0.0662	0.0777	0.0883	0.0831	0.0669	0.0703
TAG	TAG56:5FA20:2	Mol%	0.043	0.0524	0.0502	0.0426	0.0437	0.0547	0.0578	0.0555	0.0854	0.1089	0.0652	0.0654	0.0381	0.0558	0.0518	0.0394	0.0598	0.0621	0.0521	0.0429	0.0485
TAG	TAG56:5FA20:3	Mol%	0.0563	0.0596	0.0519	0.052	0.0505	0.0465	0.0431	0.0418	0.0552	0.0877	0.0471	0.0487	0.0319	0.0514	0.0571	0.0351	0.0583	0.0552	0.0435	0.043	0.0421
TAG	TAG56:5FA20:4	Mol%	0.0741	0.0592	0.0689	0.0639	0.0623	0.0559	0.0718	0.0538	0.0392	0.0652	0.0351	0.0487	0.0512	0.0557	0.072	0.051	0.0784	0.0594	0.0529	0.0478	0.0472
TAG	TAG56:5FA22:4	Mol%	0.0434	0.0319	0.0265	0.0371	0.037	0.0307	0.0372	0.0289	0.0198	0.046	0.0217	0.0313	0.0313	0.0292	0.0281	0.0302	0.033	0.0291	0.0245	0.0297	0.0292
TAG	TAG56:5FA22:5	Mol%	0.0272	0.0213	0.0191	0.0225	0.0222	0.0193	0.0304	0.0231	0.0162	0.0198	0.0175	0.0209	0.0238	0.0213	0.0201	0.0245	0.02	0.0224	0.0222	0.0215	0.022
TAG	TAG56:6FA16:0	Mol%	0.1551	0.1293	0.1191	0.1428	0.1421	0.1218	0.1732	0.1426	0.0955	0.1361	0.1115	0.1311	0.1576	0.1391	0.1183	0.1733	0.1233	0.1325	0.1358	0.1504	0.1439
TAG	TAG56:6FA18:0	Mol%	0.0439	0.0316	0.0445	0.0333	0.0335	0.0321	0.05	0.0326	0.0274	0.027	0.0272	0.029	0.0319	0.035	0.0392	0.0344	0.0418	0.0365	0.0344	0.029	0.0294
TAG	TAG56:6FA18:1	Mol%	0.2027	0.1947	0.1653	0.1895	0.181	0.1831	0.1968	0.1921	0.2029	0.2686	0.1821	0.1984	0.1771	0.1966	0.1713	0.19	0.1941	0.183	0.1743	0.1956	0.185
TAG	TAG56:6FA18:2	Mol%	0.1168	0.1452	0.1393	0.1413	0.1373	0.1528	0.1605	0.1531	0.197	0.218	0.1524	0.1646	0.1304	0.165	0.144	0.1362	0.1561	0.1818	0.1618	0.1412	0.1543
TAG	TAG56:6FA18:3	Mol%	0.0134	0.0141	0.0143	0.0125	0.0135	0.0136	0.0117	0.0151	0.0209	0.0221	0.0172	0.0163	0.0128	0.0147	0.0145	0.0138	0.0151	0.0154	0.0128	0.0147	0.0138
TAG	TAG56:6FA20:2	Mol%	0.0216	0.0327	0.0342	0.031	0.0292	0.0372	0.0382	0.0399	0.0602	0.0602	0.0455	0.0431	0.0301	0.0427	0.0323	0.0303	0.0381	0.0428	0.0407	0.0321	0.0396
TAG	TAG56:6FA20:3	Mol%	0.0707	0.0968	0.0814	0.0871	0.0863	0.0867	0.0746	0.084	0.1216	0.1521	0.0932	0.0963	0.0662	0.0964	0.0832	0.0656	0.0929	0.0995	0.0847	0.0803	0.0809
TAG	TAG56:6FA20:4	Mol%	0.1481	0.1262	0.1491	0.1311	0.1248	0.1287	0.1636	0.1145	0.1183	0.1817	0.0936	0.1213	0.1117	0.1387	0.1414	0.1147	0.1586	0.1244	0.1208	0.1081	0.1071
TAG	TAG56:6FA20:5	Mol%	0.0193	0.0123	0.0133	0.0107	0.0114	0.0119	0.017	0.0138	0.0097	0.0097	0.0091	0.0119	0.0114	0.0119	0.0132	0.0137	0.0135	0.0089	0.0097	0.01	0.0103
TAG	TAG56:6FA22:4	Mol%	0.0535	0.0514	0.0453	0.065	0.0614	0.0543	0.0681	0.0561	0.0419	0.0795	0.0437	0.0568	0.0648	0.0537	0.0474	0.0631	0.0584	0.0555	0.0496	0.0556	0.0582
TAG	TAG56:6FA22:5	Mol%	0.2947	0.2168	0.1884	0.2461	0.2409	0.1988	0.2807	0.2305	0.1541	0.2082	0.1663	0.2049	0.2463	0.2289	0.1952	0.282	0.2172	0.2124	0.2243	0.241	0.237
TAG	TAG56:6FA22:6	Mol%	0.2043	0.1362	0.1517	0.1513	0.1496	0.1323	0.2351	0.1427	0.1373	0.1494	0.1467	0.136	0.1621	0.1772	0.1395	0.1728	0.1726	0.1545	0.1649	0.1474	0.1475
TAG	TAG56:7FA16:0	Mol%	0.4559	0.3676	0.3914	0.426	0.4324	0.3229	0.5278	0.3902	0.3167	0.3825	0.3223	0.3476	0.4489	0.4286	0.3605	0.521	0.4238	0.4219	0.4501	0.4265	0.4501
TAG	TAG56:7FA16:1	Mol%	0.0209	0.0157	0.0097	0.0147	0.0155	0.0163	0.0185	0.0217	0.0233	0.0371	0.0204	0.0198	0.0187	0.0163	0.0132	0.0176	0.0172	0.0127	0.0139	0.0179	0.0143
TAG	TAG56:7FA18:0	Mol%	0.0127	0.009	0.0139	0.0096	0.0098	0.0078	0.0113	0.0096	0.0087	0.0082	0.0083	0.0079	0.0094	0.0096	0.0118	0.0103	0.0126	0.0078	0.0085	0.0082	0.0076
TAG	TAG56:7FA18:1	Mol%	0.3556	0.2704	0.2579	0.2919	0.279	0.2565	0.3806	0.2841	0.2906	0.3504	0.2692	0.2644	0.3012	0.3113	0.2664	0.3139	0.2948	0.2877	0.2964	0.2997	0.2805
TAG	TAG56:7FA18:2	Mol%	0.1979	0.2389	0.2289	0.2574	0.2607	0.2407	0.303	0.2958	0.2907	0.2937	0.2586	0.2465	0.2965	0.289	0.2302	0.3194	0.2327	0.2923	0.2964	0.2858	0.2997
TAG	TAG56:7FA18:3	Mol%	0.0183	0.0167	0.0187	0.0162	0.0157	0.016	0.0123	0.0171	0.0204	0.0232	0.0197	0.0163	0.0167	0.0164	0.0162	0.016	0.02	0.0164	0.0176	0.0151	0.0163
TAG	TAG56:7FA20:3	Mol%	0.0412	0.0573	0.0533	0.054	0.0582	0.0587	0.0523	0.0597	0.0848	0.0862	0.0688	0.0579	0.051	0.0681	0.0502	0.0489	0.057	0.0773	0.0631	0.0561	0.0645
TAG	TAG56:7FA20:4	Mol%	0.1545	0.1552	0.1522	0.1526	0.1603	0.1964	0.2168	0.1762	0.2255	0.2799	0.1689	0.1821	0.18	0.1918	0.1525	0.1597	0.1735	0.154	0.1569	0.1541	0.1613
TAG	TAG56:7FA20:5	Mol%	0.0937	0.065	0.0747	0.0677	0.0706	0.0738	0.0971	0.0862	0.0637	0.0659	0.0599	0.0761	0.0773	0.0701	0.0725	0.0839	0.0641	0.0496	0.0615	0.0683	0.0604
TAG	TAG56:7FA22:4	Mol%	0.0102	0.0109	0.0094	0.012	0.0112	0.0118	0.0135	0.0138	0.0144	0.0243	0.0124	0.0133	0.014	0.0106	0.0085	0.0124	0.0099	0.01	0.0093	0.0117	0.0113
TAG	TAG56:7FA22:5	Mol%	0.3394	0.3497	0.3596	0.423	0.426	0.3245	0.519	0.4286	0.3003	0.3457	0.3146	0.3521	0.4605	0.4025	0.3292	0.5733	0.3561	0.3946	0.4464	0.4504	0.4795
TAG	TAG56:7FA22:6	Mol%	2.1723	1.5958	1.6295	1.7944	1.7772	1.2027	2.2339	1.3876	1.3438	1.6531	1.2741	1.3037	1.5508	1.788	1.5277	1.9034	1.918	1.7234	1.8725	1.6501	1.7293
TAG	TAG56:8FA16:0	Mol%	0.4085	0.397	0.5046	0.522	0.5097	0.3047	0.6426	0.4012	0.3832	0.3918	0.3642	0.348	0.4764	0.5091	0.4134	0.6442	0.4775	0.501	0.5684	0.4859	0.5506
TAG	TAG56:8FA16:1	Mol%	0.0517	0.0395	0.0323	0.0416	0.0429	0.0375	0.0527	0.0512	0.0651	0.091	0.0556	0.0457	0.0491	0.0453	0.0318	0.0482	0.0363	0.0363	0.0376	0.0511	0.0429
TAG	TAG56:8FA18:1	Mol%	0.0687	0.0579	0.0555	0.0637	0.061	0.0641	0.0844	0.0799	0.0873	0.0917	0.0713	0.0724	0.0777	0.0682	0.0569	0.0781	0.0576	0.052	0.0579	0.0722	0.0629
TAG	TAG56:8FA18:2	Mol%	0.3902	0.3837	0.4767	0.4642	0.4637	0.3508	0.6234	0.4321	0.4461	0.4385	0.3952	0.385	0.5092	0.5354	0.3978	0.6107	0.4595	0.5031	0.5454	0.4813	0.5325
TAG	TAG56:8FA18:3	Mol%	0.0229	0.0219	0.0236	0.0221	0.0235	0.0195	0.018	0.0226	0.0265	0.0246	0.0247	0.0203	0.0263	0.02	0.0189	0.0257	0.0255	0.0211	0.0229	0.023	0.0237
TAG	TAG56:8FA20:4	Mol%	0.0855	0.0891	0.1024	0.0929	0.0923	0.1238	0.1489	0.1225	0.1564	0.1487	0.1103	0.1133	0.1228	0.1368	0.095	0.1146	0.1064	0.1074	0.1157	0.1019	0.117
TAG	TAG56:8FA20:5	Mol%	0.1272	0.106	0.1304	0.1223	0.1295	0.1526	0.1872	0.1947	0.1455	0.1277	0.1353	0.1598	0.1805	0.143	0.1278	0.1904	0.1103	0.1051	0.1306	0.1468	0.1382
TAG	TAG56:8FA22:5	Mol%	0.0712	0.0616	0.0601	0.0766	0.0762	0.064	0.09	0.0902	0.0916	0.1058	0.0817	0.0759	0.093	0.0807	0.0565	0.1009	0.0704	0.0703	0.0786	0.0839	0.0854
TAG	TAG56:8FA22:6	Mol%	2.6476	2.4266	3.0745	2.9999	3.0778	1.8117	3.7791	2.3982	2.3527	2.6569	2.08	2.111	2.844	3.1113	2.5605	3.7706	2.9774	3.2321	3.562	2.8574	3.403
TAG	TAG56:9FA18:3	Mol%	0.0265	0.0216	0.0235	0.0248	0.0259	0.0217	0.0216	0.0298	0.0316	0.0278	0.031	0.0247	0.0337	0.0247	0.0213	0.0328	0.0225	0.025	0.0265	0.0283	0.0268
TAG	TAG56:9FA20:4	Mol%	0.0196	0.015	0.0166	0.0181	0.0166	0.0177	0.0174	0.0215	0.0269	0.0273	0.023	0.0184	0.0251	0.0148	0.0168	0.0213	0.0173	0.0154	0.0147	0.0172	0.0168
TAG	TAG56:9FA20:5	Mol%	0.067	0.0607	0.0866	0.0757	0.0782	0.0978	0.1249	0.1356	0.1033	0.0696	0.0966	0.102	0.134	0.0964	0.0802	0.1463	0.0642	0.0769	0.0986	0.1027	0.1042
TAG	TAG56:9FA22:6	Mol%	0.3109	0.2848	0.295	0.3252	0.3364	0.2809	0.3847	0.3835	0.5651	0.5886	0.4457	0.3308	0.4223	0.3585	0.2431	0.445	0.3013	0.3215	0.337	0.3848	0.3535
TAG	TAG57:2FA18:1	Mol%	0.1138	0.1641	0.1723	0.1541	0.155	0.1593	0.2778	0.1926	0.3015	0.2435	0.1862	0.1745	0.1704	0.2673	0.1408	0.2131	0.2239	0.2337	0.2682	0.1906	0.2209
TAG	TAG57:3FA18:2	Mol%	0.0936	0.1493	0.1819	0.1509	0.1525	0.1769	0.3209	0.243	0.3611	0.2226	0.2116	0.1855	0.2141	0.314	0.1505	0.2815	0.2236	0.2962	0.3569	0.2211	0.285
TAG	TAG57:8FA22:6	Mol%	0.0423	0.0322	0.0567	0.0335	0.0355	0.02	0.0513	0.0228	0.039	0.0369	0.0281	0.0224	0.0244	0.0378	0.041	0.0365	0.0586	0.0399	0.0409	0.0254	0.0362
TAG	TAG57:9FA22:6	Mol%	0.2689	0.1733	0.4333	0.1622	0.168	0.0284	0.1115	0.037	0.0624	0.0776	0.0393	0.0324	0.0349	0.1211	0.3428	0.0774	0.5399	0.1803	0.18	0.0518	0.1127
TAG	TAG58:10FA18:2	Mol%	0.0869	0.1447	0.1647	0.1452	0.1457	0.1669	0.3118	0.2379	0.3406	0.2078	0.1948	0.1791	0.2033	0.3241	0.143	0.2661	0.209	0.29	0.3443	0.2012	0.2737
TAG	TAG58:10FA20:4	Mol%	0.0258	0.0163	0.026	0.0191	0.0169	0.0148	0.0425	0.0171	0.0222	0.0275	0.0163	0.0164	0.0212	0.0222	0.0219	0.0213	0.0263	0.0166	0.0177	0.0133	0.0157
TAG	TAG58:10FA20:5	Mol%	0.0124	0.0078	0.0085	0.0079	0.0096	0.0067	0.0132	0.0096	0.0082	0.0083	0.0078	0.0075	0.0105	0.0079	0.0088	0.0113	0.01	0.0073	0.0067	0.0075	0.0073
TAG	TAG58:10FA22:5	Mol%	0.012	0.0155	0.017	0.0175	0.0185	0.0185	0.0237	0.0279	0.033	0.023	0.0242	0.0203	0.0287	0.0247	0.015	0.0303	0.0196	0.0217	0.0262	0.023	0.0277
TAG	TAG58:10FA22:6	Mol%	0.3133	0.5064	0.5597	0.5	0.4683	0.5466	0.9338	0.7136	1.0571	0.7	0.6635	0.5539	0.6559	0.956	0.4379	0.8387	0.6832	0.8404	1.0655	0.6641	0.839
TAG	TAG58:2FA18:1	Mol%	0.0067	0.0038	0.0044	0.0029	0.0026	0.0018	0.0039	0.0016	0.0027	0.0067	0.0013	0.0029	0.0014	0.0039	0.0044	0.0015	0.0055	0.0027	0.0026	0.0027	0.0025
TAG	TAG58:3FA18:1	Mol%	0.0137	0.0086	0.008	0.0077	0.0078	0.005	0.0089	0.0055	0.0083	0.0258	0.0048	0.0093	0.0037	0.0102	0.0094	0.0041	0.0115	0.0079	0.0055	0.008	0.0067
TAG	TAG58:5FA18:1	Mol%	0.0106	0.0081	0.0075	0.0077	0.0082	0.0086	0.0096	0.0085	0.0116	0.0261	0.009	0.0111	0.0064	0.0096	0.008	0.005	0.0112	0.0069	0.0066	0.0082	0.0079
TAG	TAG58:6FA16:0	Mol%	0.0093	0.0071	0.0062	0.0059	0.006	0.0114	0.0131	0.0132	0.0143	0.0271	0.0163	0.0149	0.0119	0.0088	0.0072	0.0064	0.01	0.0072	0.0074	0.0108	0.0081
TAG	TAG58:6FA18:0	Mol%	0.0105	0.0086	0.0108	0.0071	0.0073	0.0071	0.0129	0.0082	0.0083	0.0085	0.0057	0.0069	0.0061	0.0106	0.0093	0.0066	0.0125	0.0083	0.0083	0.0063	0.0069
TAG	TAG58:6FA18:1	Mol%	0.0193	0.0216	0.0172	0.0178	0.0183	0.0279	0.0292	0.0277	0.0299	0.0522	0.0246	0.0292	0.0212	0.0241	0.0178	0.0174	0.0273	0.0184	0.0192	0.0208	0.0207
TAG	TAG58:6FA20:4	Mol%	0.0081	0.0058	0.0077	0.005	0.0042	0.0038	0.0059	0.0036	0.0058	0.0116	0.0033	0.005	0.003	0.0059	0.0056	0.0028	0.0063	0.0042	0.0042	0.0039	0.0042
TAG	TAG58:6FA22:4	Mol%	0.0112	0.0133	0.0085	0.0111	0.0099	0.0157	0.0167	0.0139	0.0149	0.0259	0.0093	0.0142	0.0103	0.0137	0.0104	0.0093	0.0152	0.0108	0.0112	0.0102	0.0115
TAG	TAG58:6FA22:5	Mol%	0.0125	0.0115	0.0116	0.0116	0.0107	0.0126	0.0197	0.0145	0.0157	0.0162	0.0105	0.0131	0.0111	0.0172	0.0103	0.0133	0.0165	0.0142	0.0136	0.0113	0.0128
TAG	TAG58:7FA16:0	Mol%	0.0253	0.0189	0.0166	0.0166	0.0163	0.0202	0.0273	0.0257	0.0287	0.0465	0.0349	0.028	0.026	0.0197	0.0186	0.0172	0.0232	0.0183	0.0163	0.0225	0.0199
TAG	TAG58:7FA18:0	Mol%	0.0182	0.0176	0.022	0.0175	0.0163	0.0167	0.0294	0.0193	0.0214	0.017	0.0145	0.0161	0.0154	0.0266	0.0224	0.0203	0.0272	0.0223	0.0242	0.0151	0.0186
TAG	TAG58:7FA18:1	Mol%	0.0615	0.0707	0.0552	0.0631	0.063	0.0822	0.1046	0.0942	0.1027	0.1232	0.0676	0.0849	0.0704	0.106	0.0584	0.0706	0.0884	0.0748	0.0806	0.0742	0.0805
TAG	TAG58:7FA18:2	Mol%	0.0235	0.0268	0.0267	0.0273	0.027	0.0381	0.0479	0.0471	0.0511	0.072	0.0434	0.0436	0.0381	0.0448	0.0275	0.0318	0.0392	0.0363	0.038	0.0342	0.0374
TAG	TAG58:7FA20:4	Mol%	0.0177	0.009	0.0125	0.0087	0.0094	0.0067	0.0121	0.0064	0.0091	0.0174	0.0059	0.0078	0.0059	0.0105	0.0124	0.0061	0.0182	0.0077	0.0075	0.0055	0.0066
TAG	TAG58:7FA22:4	Mol%	0.0135	0.0219	0.0185	0.0207	0.0212	0.0322	0.0382	0.0342	0.0355	0.0524	0.0235	0.0314	0.0246	0.0327	0.0158	0.0231	0.0288	0.0261	0.024	0.0225	0.0279
TAG	TAG58:7FA22:5	Mol%	0.0587	0.0698	0.0627	0.0625	0.0637	0.0749	0.1078	0.0903	0.0967	0.1033	0.0635	0.075	0.0668	0.1065	0.0586	0.0721	0.0877	0.0776	0.084	0.073	0.0811
TAG	TAG58:7FA22:6	Mol%	0.0883	0.0914	0.0987	0.078	0.0806	0.078	0.1535	0.0869	0.1172	0.1154	0.0812	0.0839	0.0743	0.1365	0.0893	0.0848	0.1234	0.1046	0.1106	0.0764	0.0883
TAG	TAG58:8FA18:1	Mol%	0.1258	0.1566	0.1326	0.1405	0.1446	0.1746	0.2564	0.2029	0.2591	0.2579	0.168	0.1723	0.1532	0.2512	0.1336	0.1812	0.2	0.181	0.2235	0.1808	0.2
TAG	TAG58:8FA18:2	Mol%	0.063	0.0904	0.0841	0.0857	0.0836	0.1028	0.1486	0.1276	0.148	0.1331	0.0944	0.1022	0.1016	0.1376	0.0782	0.1099	0.113	0.1241	0.1285	0.0986	0.1277
TAG	TAG58:8FA20:3	Mol%	0.0076	0.0051	0.0052	0.0043	0.0049	0.0036	0.0052	0.0043	0.0062	0.0089	0.0045	0.0042	0.004	0.0051	0.0043	0.0036	0.0078	0.0054	0.0047	0.004	0.0048
TAG	TAG58:8FA20:4	Mol%	0.0342	0.0174	0.0285	0.0155	0.0165	0.0087	0.0249	0.0083	0.0121	0.0207	0.0079	0.0102	0.0096	0.014	0.0255	0.0107	0.0435	0.0139	0.0143	0.0077	0.0104
TAG	TAG58:8FA22:5	Mol%	0.0767	0.1206	0.1075	0.1159	0.1124	0.1474	0.209	0.1893	0.2141	0.1918	0.1359	0.1477	0.1465	0.2059	0.0987	0.1641	0.1518	0.1545	0.1713	0.1516	0.1752
TAG	TAG58:8FA22:6	Mol%	0.4612	0.4946	0.5143	0.4515	0.4449	0.4236	0.7311	0.4515	0.6511	0.6656	0.4265	0.4297	0.3884	0.7126	0.457	0.5045	0.6971	0.5839	0.6357	0.4732	0.5273
TAG	TAG58:9FA18:1	Mol%	0.1053	0.1559	0.1582	0.1362	0.1409	0.1486	0.2586	0.1733	0.2741	0.2146	0.1689	0.1586	0.1545	0.2499	0.1349	0.1969	0.1992	0.2097	0.2434	0.1776	0.1949
TAG	TAG58:9FA18:2	Mol%	0.1054	0.1674	0.1646	0.161	0.1642	0.1936	0.3285	0.2537	0.3573	0.2537	0.2047	0.2023	0.2089	0.3199	0.1484	0.263	0.2357	0.2549	0.3097	0.2219	0.262
TAG	TAG58:9FA20:4	Mol%	0.0199	0.0113	0.0157	0.0141	0.0127	0.01	0.019	0.01	0.0125	0.0192	0.0093	0.0098	0.0115	0.0135	0.0138	0.0113	0.0165	0.0106	0.0102	0.0086	0.0106
TAG	TAG58:9FA22:5	Mol%	0.0426	0.0697	0.0659	0.0712	0.0675	0.0966	0.1407	0.1347	0.1564	0.1064	0.0993	0.095	0.1091	0.1487	0.0626	0.1245	0.0937	0.1138	0.1412	0.1054	0.1299
TAG	TAG58:9FA22:6	Mol%	0.598	0.8234	0.8264	0.7945	0.7602	0.823	1.3934	0.9598	1.4925	1.1761	0.9217	0.8521	0.8654	1.4902	0.7491	1.0864	1.1248	1.1413	1.4113	0.9746	1.1063
TAG	TAG60:10FA22:5	Mol%	0.0079	0.0093	0.0096	0.01	0.0097	0.0077	0.0153	0.0123	0.0127	0.0143	0.0084	0.0085	0.0108	0.0143	0.0082	0.0121	0.0127	0.0101	0.0112	0.0095	0.0115
TAG	TAG60:10FA22:6	Mol%	0.042	0.0421	0.0517	0.0443	0.0418	0.0287	0.07	0.0356	0.0602	0.0699	0.0334	0.0347	0.034	0.0613	0.0446	0.0424	0.0671	0.0547	0.053	0.0347	0.0468
TAG	TAG60:11FA22:5	Mol%	0.0149	0.015	0.014	0.016	0.0158	0.013	0.0315	0.0209	0.0212	0.0194	0.0155	0.0145	0.0205	0.0253	0.0133	0.0244	0.0202	0.0184	0.0208	0.016	0.0193
TAG	TAG60:11FA22:6	Mol%	0.0523	0.0588	0.0601	0.0629	0.0658	0.0493	0.1164	0.0692	0.0944	0.0901	0.061	0.0532	0.0687	0.0939	0.055	0.0833	0.0783	0.0784	0.0817	0.0604	0.0759
TAG	TAG60:12FA22:6	Mol%	0.0939	0.1003	0.1077	0.1028	0.1017	0.0917	0.2622	0.1342	0.1968	0.1552	0.1245	0.0965	0.1462	0.1883	0.0894	0.1711	0.1387	0.1416	0.158	0.1126	0.1364

## Sheet: Fatty Acid Concentrations
TrueMass® Complex Lipid Panel: Fatty Acid Concentrations
Project Code:	WAKE-0204-18VWCLP
		Sample Name	WAKE-01208-01	WAKE-01209-01	WAKE-01210-01	WAKE-01211-01	WAKE-01212-01	WAKE-01213-01	WAKE-01214-01	WAKE-01215-01	WAKE-01216-01	WAKE-01217-01	WAKE-01218-01	WAKE-01219-01	WAKE-01220-01	WAKE-01221-01	WAKE-01222-01	WAKE-01223-01	WAKE-01224-01	WAKE-01225-01	WAKE-01226-01	WAKE-01227-01	WAKE-01228-01
		CLIENT IDENTIFIER	Sham4	Sham5	Sham6	Sham7	Sham8	CLP1	CLP2	CLP3	CLP4	CLP5	CLP6	CLP7	CLP8	DCA1	DCA2	DCA3	DCA4	DCA5	DCA6	DCA7	DCA8
		AGE	8wk	8wk	8wk	8wk	8wk	8wk	8wk	8wk	8wk	8wk	8wk	8wk	8wk	8wk	8wk	8wk	8wk	8wk	8wk	8wk	8wk
		AMOUNT EXTRACTED CLP	75	75	75	75	75	75	75	75	75	75	75	75	75	75	75	75	75	75	75	75	75
		BRADFORD CLP	13.238	9.19	11.778	9.73	9.801	8.604	12.735	9.121	8.822	9.049	8.744	8.788	9.677	9.331	10.476	11.423	11.957	10.915	8.045	8.718	7.411
		CELL LINE	Primary cells	Primary cells	Primary cells	Primary cells	Primary cells	Primary cells	Primary cells	Primary cells	Primary cells	Primary cells	Primary cells	Primary cells	Primary cells	Primary cells	Primary cells	Primary cells	Primary cells	Primary cells	Primary cells	Primary cells	Primary cells
		GENDER	M	M	M	M	M	M	M	M	M	M	M	M	M	M	M	M	M	M	M	M	M
		ORIG ORDER	4	5	6	7	8	9	10	11	12	13	14	15	16	17	18	19	20	21	22	23	24
		SPL AMNT	150-200 ul cell pellet	150-200 ul cell pellet	150-200 ul cell pellet	150-200 ul cell pellet	150-200 ul cell pellet	150-200 ul cell pellet	150-200 ul cell pellet	150-200 ul cell pellet	150-200 ul cell pellet	150-200 ul cell pellet	150-200 ul cell pellet	150-200 ul cell pellet	150-200 ul cell pellet	150-200 ul cell pellet	150-200 ul cell pellet	150-200 ul cell pellet	150-200 ul cell pellet	150-200 ul cell pellet	150-200 ul cell pellet	150-200 ul cell pellet	150-200 ul cell pellet
		SPL TYPE	cells	cells	cells	cells	cells	cells	cells	cells	cells	cells	cells	cells	cells	cells	cells	cells	cells	cells	cells	cells	cells
		SUBJ ID	C57/BL6 mouse	C57/BL6 mouse	C57/BL6 mouse	C57/BL6 mouse	C57/BL6 mouse	C57/BL6 mouse	C57/BL6 mouse	C57/BL6 mouse	C57/BL6 mouse	C57/BL6 mouse	C57/BL6 mouse	C57/BL6 mouse	C57/BL6 mouse	C57/BL6 mouse	C57/BL6 mouse	C57/BL6 mouse	C57/BL6 mouse	C57/BL6 mouse	C57/BL6 mouse	C57/BL6 mouse	C57/BL6 mouse
		TIME POINT	30 hr	30 hr	30 hr	30 hr	30 hr	30 hr	30 hr	30 hr	30 hr	30 hr	30 hr	30 hr	30 hr	30 hr	30 hr	30 hr	30 hr	30 hr	30 hr	30 hr	30 hr
		TREATMENT	None	None	None	None	None	CLP/PBS	CLP/PBS	CLP/PBS	CLP/PBS	CLP/PBS	CLP/PBS	CLP/PBS	CLP/PBS	CLP/DCA	CLP/DCA	CLP/DCA	CLP/DCA	CLP/DCA	CLP/DCA	CLP/DCA	CLP/DCA
		TX	Sham	Sham	Sham	Sham	Sham	CLP/PBS	CLP/PBS	CLP/PBS	CLP/PBS	CLP/PBS	CLP/PBS	CLP/PBS	CLP/PBS	CLP/DCA	CLP/DCA	CLP/DCA	CLP/DCA	CLP/DCA	CLP/DCA	CLP/DCA	CLP/DCA
		GROUP NAME	11.8.18 30hr sham mouse hepatocytes	11.8.18 30hr sham mouse hepatocytes	9.13.18 30hr sham mouse hepatocytes	10.9.18 30hr sham mouse hepayocytes	10.9.18 30hr sham mouse hepayocytes	11.8.18 30hr CLP mouse hepatocytes	9.20.18 30hr CLP mouse hepatocytes	10.11.18 30hr CLP mouse hepatocytes	9.25.18 30hr CLP mouse hepatocytes	10.11.18 30hr CLP mouse hepatocytes	9.27.18 30hr CLP mouse hepatocytes	10.4.18 30hr CLP mouse hepatocytes	10.9.18 30hr CLP mouse hepatocytes	9.18.18 30hr CLP+DCA mouse hepatocytes	9.18.18 30hr CLP+DCA mouse hepatocytes	9.20.18 30hr CLP+DCA mouse hepatocytes	9.25.18 30hr CLP+DCA mouse hepatocytes	9.27.18 30hr CLP+DCA mouse hepatocytes	9.27.18 30hr CLP+DCA mouse hepatocytes	10.4.18 30hr CLP+DCA mouse hepatocytes	10.4.18 30hr CLP+DCA mouse hepatocytes
Class	Name	Group Units	1	1	1	1	1	2	2	2	2	2	2	2	2	3	3	3	3	3	3	3	3
CER	CER[FA14:0]	uM	0.0021	0.0024	0.0017	0.0025	0.0027	0.0036	0.0023	0.0037	0.0027	0.0024	0.0035	0.0029	0.0039	0.0023	0.0022	0.003	0.0022	0.0022	0.0026	0.0024	0.0027
CER	CER[FA16:0]	uM	0.0752	0.06	0.0547	0.0625	0.0627	0.1383	0.1258	0.1196	0.0816	0.0522	0.0992	0.1203	0.1885	0.101	0.0731	0.1064	0.0806	0.0835	0.0716	0.0841	0.074
CER	CER[FA18:0]	uM	0.0061	0.0097	0.006	0.0094	0.0088	0.0338	0.0197	0.0335	0.0171	0.0049	0.0309	0.0198	0.0274	0.0144	0.0085	0.0149	0.0072	0.0089	0.0092	0.0078	0.0094
CER	CER[FA18:1]	uM	0.0006	0.0006	0.0004	0.0005	0.0005	0.0008	0.0009	0.001	0.0012	0.0009	0.0012	0.0008	0.0008	0.0005	0.0003	0.0007	0.0004	0.0008		0.0007	0.0006
CER	CER[FA20:0]	uM	0.0174	0.0272	0.0206	0.0244	0.0236	0.0563	0.0403	0.0497	0.0391	0.0174	0.0555	0.0467	0.041	0.036	0.0264	0.0305	0.0181	0.0232	0.0237	0.0208	0.024
CER	CER[FA20:1]	uM	0.0005	0.0008	0.0006	0.0006	0.0007	0.0016	0.0012	0.0018	0.0017	0.0011	0.0022	0.0013	0.0018	0.0008	0.0006	0.0012	0.0006	0.0007	0.0008	0.001	0.001
CER	CER[FA22:0]	uM	0.4152	0.3159	0.3026	0.2984	0.2956	0.4911	0.4975	0.334	0.3422	0.1904	0.3113	0.4647	0.3706	0.4649	0.4179	0.2722	0.2741	0.3239	0.2678	0.2918	0.278
CER	CER[FA22:1]	uM	0.0288	0.0273	0.0226	0.0299	0.0281	0.042	0.0394	0.0466	0.029	0.0293	0.0398	0.0415	0.0374	0.0343	0.0336	0.0282	0.0262	0.0231	0.0215	0.0264	0.0249
CER	CER[FA24:0]	uM	0.6297	0.3193	0.3246	0.3183	0.3134	0.5045	0.5475	0.3192	0.3197	0.2086	0.2696	0.4796	0.3723	0.4841	0.4597	0.269	0.3772	0.4103	0.3408	0.3504	0.328
CER	CER[FA24:1]	uM	0.5286	0.3648	0.3548	0.4351	0.4259	0.5543	0.5495	0.3808	0.2422	0.2296	0.2945	0.4817	0.4595	0.4366	0.5272	0.38	0.4166	0.3891	0.3146	0.361	0.347
CER	CER[FA26:0]	uM	0.0014	0.0008	0.0007	0.001	0.0009	0.0015	0.0012	0.0008	0.0009	0.0008	0.0009	0.0012	0.0014	0.0007	0.001	0.001	0.0007	0.001	0.0012	0.0009	0.0009
CER	CER[FA26:1]	uM	0.0013	0.0011	0.0007	0.0011	0.001	0.0014	0.0015	0.0018	0.0011	0.0007	0.0009	0.0015	0.0013	0.001	0.0011	0.0012	0.001	0.0009	0.001	0.0009	0.0011
CE	CE[FA12:0]	uM		0.0013		0.0009					0.0012					0.0014	0.001				0.0017	0.0016
CE	CE[FA14:0]	uM	0.0087	0.0152	0.0052	0.0119	0.011	0.0374	0.0068	0.0251	0.0082	0.0148	0.0121	0.0335	0.0436	0.0227	0.0091	0.0237	0.0106	0.0156	0.0273	0.0316	0.0277
CE	CE[FA14:1]	uM	0.0014	0.0017	0.001	0.0017	0.0014	0.0065	0.0015	0.0046	0.0022	0.0033	0.0024	0.0055	0.0069	0.0051	0.0015	0.004	0.0014	0.0023	0.0038	0.0049	0.004
CE	CE[FA15:0]	uM	0.0064	0.0097	0.0037	0.0072	0.0066	0.0159	0.0052	0.0097	0.0059	0.0084	0.009	0.0152	0.0188	0.0129	0.0057	0.0108	0.0069	0.0098	0.0161	0.0129	0.0145
CE	CE[FA16:0]	uM	0.2835	0.7318	0.2899	0.5452	0.5254	1.8026	0.2191	1.0652	0.1341	0.2923	0.3104	1.8813	1.9124	1.0815	0.3725	1.2464	0.4268	0.8348	1.6311	1.5807	1.6243
CE	CE[FA16:1]	uM	0.2357	0.5876	0.1745	0.4256	0.4069	1.2491	0.0937	0.8322	0.0589	0.3147	0.1835	1.4652	1.4956	0.6287	0.2364	0.8389	0.2902	0.493	0.896	1.5367	1.0357
CE	CE[FA17:0]	uM	0.0203	0.0461	0.0224	0.0335	0.0319	0.0857	0.0128	0.0423	0.0079	0.0171	0.0172	0.0812	0.0773	0.0548	0.0269	0.0641	0.0301	0.041	0.0858	0.0727	0.0765
CE	CE[FA18:0]	uM	0.0934	0.2256	0.1022	0.1515	0.1516	0.4551	0.0626	0.2018	0.0294	0.0646	0.0654	0.4107	0.3853	0.3217	0.1255	0.2807	0.1455	0.2373	0.4622	0.3618	0.3867
CE	CE[FA18:1]	uM	1.2609	3.4086	1.4486	2.4468	2.3254	6.923	0.7214	3.1572	0.2679	1.1113	0.829	6.2378	6.575	5.0017	1.8007	4.3976	2.1231	3.8564	7.0434	6.7927	6.5711
CE	CE[FA18:2]	uM	1.0019	2.4391	1.2214	1.9373	1.907	5.1691	0.9644	2.8691	0.5545	0.977	0.9995	4.7957	5.3063	3.9475	1.3508	3.8271	1.5248	2.9901	5.9858	5.1435	5.6906
CE	CE[FA18:3]	uM	0.0698	0.1571	0.0671	0.1182	0.1145	0.3184	0.0312	0.2167	0.0285	0.0551	0.0571	0.3531	0.4192	0.1714	0.0743	0.2483	0.0739	0.1662	0.3334	0.34	0.3474
CE	CE[FA18:4]	uM	0.0031	0.0043	0.0026	0.0032	0.0029	0.003	0.001	0.0036	0.0012	0.0012	0.0021	0.0044	0.0047	0.0033	0.0025	0.0046	0.0027	0.0038	0.0057	0.0051	0.0053
CE	CE[FA20:0]	uM	0.0085	0.0132	0.0105	0.0099	0.0098	0.0215	0.0061	0.0108	0.0075	0.0091	0.0084	0.0214	0.0166	0.0276	0.0104	0.0193	0.0127	0.0184	0.0442	0.0203	0.0299
CE	CE[FA20:1]	uM	0.014	0.0217	0.0145	0.0193	0.0194	0.0348	0.0137	0.0262	0.0185	0.0206	0.0202	0.0306	0.0346	0.0296	0.0174	0.0284	0.0191	0.0283	0.0431	0.0393	0.0392
CE	CE[FA20:2]	uM	0.0059	0.0111	0.0074	0.0098	0.0094	0.0255	0.0067	0.0115	0.0118	0.0109	0.016	0.0172	0.0142	0.0134	0.007	0.0118	0.0098	0.0178	0.0233	0.0166	0.0208
CE	CE[FA20:3]	uM	0.0142	0.0189	0.0094	0.018	0.0169	0.0535	0.0138	0.0238	0.02	0.0245	0.0304	0.0428	0.0327	0.0249	0.0111	0.0212	0.0121	0.0214	0.03	0.0348	0.0306
CE	CE[FA20:4]	uM	0.106	0.1376	0.0567	0.132	0.1251	0.3749	0.1204	0.185	0.1141	0.1316	0.1441	0.289	0.2712	0.1763	0.0657	0.1683	0.0846	0.1431	0.2072	0.243	0.2151
CE	CE[FA20:5]	uM	0.0268	0.0253	0.0146	0.022	0.0215	0.0498	0.0224	0.0402	0.0174	0.0157	0.0242	0.044	0.055	0.0353	0.0162	0.0398	0.0178	0.0268	0.0474	0.0445	0.0445
CE	CE[FA22:0]	uM	0.0026	0.0032	0.0024	0.002	0.0025	0.005	0.0021	0.0045	0.0025	0.0037	0.0039	0.0043	0.0055	0.0059	0.0019	0.0045	0.0033	0.0043	0.0066	0.0068	0.0042
CE	CE[FA22:1]	uM	0.0057	0.0077	0.0051	0.0057	0.0063	0.0095	0.0046	0.0078	0.0075	0.0078	0.0084	0.0108	0.0109	0.0103	0.0053	0.0069	0.0061	0.0108	0.0129	0.0102	0.0108
CE	CE[FA22:2]	uM	0.0048	0.0075	0.0053	0.0074	0.006	0.0079	0.0062	0.0075	0.0098	0.0087	0.0082	0.0092	0.0077	0.0067	0.0046	0.008	0.0055	0.0097	0.0139	0.0084	0.0113
CE	CE[FA22:4]	uM	0.0009	0.0015	0.0007	0.0016	0.0013	0.017	0.0032	0.0073	0.0099	0.0072	0.0098	0.0076	0.0033	0.0027	0.001	0.0019	0.0009	0.0019	0.0032	0.0035	0.0027
CE	CE[FA22:5]	uM	0.0079	0.0118	0.0057	0.0119	0.0105	0.0484	0.0141	0.0311	0.0202	0.0143	0.0184	0.0374	0.0377	0.0258	0.0081	0.0264	0.0079	0.0179	0.0284	0.0358	0.028
CE	CE[FA22:6]	uM	0.1248	0.2072	0.0868	0.1877	0.1704	0.6428	0.2168	0.4234	0.1776	0.188	0.2238	0.5291	0.5176	0.4346	0.1078	0.4095	0.1349	0.3076	0.4238	0.6038	0.4487
CE	CE[FA24:0]	uM	0.0016	0.0022	0.0018	0.002	0.002	0.0051	0.0023	0.0044	0.0024	0.0029	0.004	0.0068	0.0058	0.0042	0.0018	0.003	0.0018	0.0027	0.0048	0.0052	0.0038
CE	CE[FA24:1]	uM	0.0019	0.0026	0.0014	0.0023	0.0024	0.0137	0.0027	0.007	0.0033	0.0043	0.0068	0.006	0.0063	0.0045	0.0025	0.003	0.0026	0.0027	0.005	0.0041	0.0042
DAG	DAG[FA12:0]	uM	0.0058	0.0128	0.0069	0.0108	0.0111	0.0223	0.0088	0.0276	0.0547	0.0271	0.0491	0.0324	0.0243	0.0146	0.0059	0.0148	0.0079	0.0061	0.0105	0.0194	0.0132
DAG	DAG[FA14:0]	uM	0.0515	0.0498	0.0332	0.0556	0.0483	0.2058	0.0607	0.1754	0.3013	0.2604	0.3177	0.2368	0.1704	0.0555	0.0385	0.0828	0.0297	0.047	0.0499	0.1276	0.0802
DAG	DAG[FA14:1]	uM	0.004	0.0051	0.0041	0.004	0.0044	0.0091	0.0061	0.01	0.0126	0.0101	0.0101	0.0107	0.0078	0.0052	0.0041	0.0046	0.0032	0.0043	0.0101	0.006	0.0061
DAG	DAG[FA15:0]	uM	0.0223	0.0261	0.02	0.0263	0.0237	0.061	0.0279	0.0508	0.0756	0.0728	0.083	0.0748	0.0558	0.0235	0.0205	0.0295	0.0147	0.0168	0.0224	0.0493	0.0416
DAG	DAG[FA16:0]	uM	2.4159	3.1994	2.142	3.1846	3.236	6.8705	3.1765	5.3601	5.6356	5.5685	6.9106	7.7528	6.2474	2.4648	1.9037	3.6027	1.5144	2.4921	2.4229	5.6487	4.0897
DAG	DAG[FA16:1]	uM	0.192	0.2643	0.1274	0.2384	0.238	0.7415	0.1735	0.6252	1.1585	1.437	1.2908	1.0294	0.7108	0.1856	0.1368	0.2965	0.1066	0.1529	0.1792	0.6405	0.318
DAG	DAG[FA18:0]	uM	0.5312	0.7588	0.5375	0.6747	0.6886	1.2233	0.6969	1.0186	1.1038	0.7587	1.1301	1.2799	0.949	0.4909	0.4326	0.6171	0.3937	0.5114	0.5036	0.6616	0.6546
DAG	DAG[FA18:1]	uM	1.7613	2.7978	1.5162	2.5586	2.6142	8.8802	2.7604	6.0109	9.3845	9.1093	9.7655	10.284	6.2276	2.4109	1.4063	3.2529	1.2342	2.0411	2.4534	6.0895	3.9938
DAG	DAG[FA18:2]	uM	2.3348	3.8241	2.5296	3.7923	3.9081	11.1491	4.1722	8.4356	12.0945	10.5878	13.1039	13.0978	9.2364	3.3487	2.1558	4.9326	1.7702	3.0372	3.5188	8.0844	5.6706
DAG	DAG[FA18:3]	uM	0.0777	0.1105	0.0794	0.1186	0.1146	0.3604	0.0771	0.2816	0.4896	0.2795	0.4537	0.4026	0.3459	0.0912	0.0596	0.1605	0.0467	0.0902	0.0902	0.292	0.1712
DAG	DAG[FA20:0]	uM	0.0084	0.0042	0.003	0.0073	0.0049	0.0164		0.0148	0.0185	0.0186	0.0148	0.0131	0.0136		0.0037	0.0075	0.0067	0.0063	0.0081	0.0149	0.0095
DAG	DAG[FA20:1]	uM	0.014	0.0187	0.0114	0.0148	0.0153	0.0492	0.0215	0.0376	0.0686	0.1178	0.0575	0.0683	0.03	0.0178	0.0112	0.0182	0.0094	0.0129	0.0176	0.0402	0.0252
DAG	DAG[FA20:2]	uM	0.0212	0.0262	0.0187	0.0247	0.0218	0.0669	0.0275	0.0525	0.1148	0.1666	0.093	0.0961	0.0437	0.0267	0.0165	0.029	0.0165	0.0239	0.0281	0.0558	0.0377
DAG	DAG[FA20:3]	uM	0.1127	0.12	0.0792	0.1184	0.1259	0.1844	0.0824	0.1297	0.3013	0.3394	0.2263	0.2286	0.1367	0.0709	0.0707	0.0847	0.0638	0.098	0.0832	0.1514	0.12
DAG	DAG[FA20:4]	uM	0.2634	0.2962	0.2	0.3179	0.323	0.4395	0.2863	0.308	0.4426	0.543	0.381	0.4366	0.3958	0.1911	0.1749	0.2797	0.167	0.2025	0.1958	0.308	0.2794
DAG	DAG[FA20:5]	uM	0.059	0.0665	0.0489	0.067	0.0731	0.1716	0.083	0.1691	0.1723	0.1133	0.1609	0.2181	0.1994	0.0475	0.0371	0.1006	0.0283	0.0466	0.0577	0.137	0.0887
DAG	DAG[FA22:4]	uM	0.0051	0.0076	0.0045	0.0085	0.0087	0.0325	0.0107	0.0217	0.0374	0.0547	0.0293	0.0369	0.0249	0.0096	0.004	0.0119	0.0047	0.006	0.0096	0.0199	0.015
DAG	DAG[FA22:5]	uM	0.1047	0.1341	0.0772	0.1391	0.1465	0.3863	0.1977	0.3716	0.5192	0.4179	0.4244	0.5015	0.3601	0.1348	0.0687	0.2214	0.0632	0.1221	0.1539	0.3489	0.2618
DAG	DAG[FA22:6]	uM	0.6418	0.8826	0.6001	0.8665	0.9193	1.9186	1.2058	1.4813	2.5138	1.9092	1.9847	2.2912	1.7677	0.864	0.4808	1.155	0.451	0.6911	0.8023	1.5209	1.2623
DCER	DCER[FA14:0]	uM		0.0021			0.0017			0.003		0.003	0.0033		0.0039	0.0025	0.0023		0.0016		0.0017	0.0029	0.0029
DCER	DCER[FA16:0]	uM	0.0128	0.0108	0.0092	0.0096	0.0105	0.0308	0.0233	0.0407	0.0207	0.0102	0.0275	0.0284	0.0364	0.017	0.0135	0.0187	0.0152	0.0127	0.0108	0.017	0.0135
DCER	DCER[FA18:0]	uM	0.0022	0.003	0.002	0.0028	0.0026	0.0101	0.0061	0.0159	0.0075		0.0102	0.0073	0.0087	0.0045	0.0019	0.0032	0.0024	0.003	0.0031	0.0024	0.0034
DCER	DCER[FA20:0]	uM	0.0048	0.0073	0.0064	0.0068	0.0071	0.0149	0.0092	0.0181	0.0133	0.0064	0.0231	0.0161	0.013	0.0108	0.0061	0.007	0.0049	0.0085	0.007	0.0064	0.0077
DCER	DCER[FA20:1]	uM
DCER	DCER[FA22:0]	uM	0.0548	0.0451	0.0431	0.0365	0.0392	0.0844	0.0706	0.0743	0.055	0.0273	0.0686	0.0912	0.057	0.0695	0.0558	0.037	0.0403	0.044	0.0364	0.0427	0.0418
DCER	DCER[FA22:1]	uM	0.0096	0.0096	0.0085	0.0091	0.0103	0.0141	0.0106	0.0119	0.0149	0.0102	0.015	0.0135	0.0146	0.0123	0.0099	0.007	0.0078	0.0093	0.0099	0.0099	0.0119
DCER	DCER[FA24:0]	uM	0.0644	0.0364	0.039	0.0341	0.035	0.0592	0.06	0.0473	0.0412	0.0231	0.0365	0.0642	0.0441	0.0555	0.0518	0.0274	0.0438	0.0423	0.0341	0.042	0.0347
DCER	DCER[FA24:1]	uM	0.0729	0.066	0.064	0.0693	0.0667	0.0864	0.0869	0.0791	0.0628	0.0529	0.076	0.0863	0.0764	0.0823	0.0816	0.0626	0.069	0.0651	0.0637	0.0586	0.0753
DCER	DCER[FA26:0]	uM	0.0049	0.0063	0.0042	0.0038	0.0029	0.0108	0.005	0.0042	0.0068	0.0046	0.0067	0.0053		0.0061	0.0101	0.0041	0.0042	0.0046	0.0069	0.0136	0.0049
DCER	DCER[FA26:1]	uM	0.0031	0.0045	0.0032	0.0033	0.0039	0.0045	0.0036	0.0045	0.0039	0.0037	0.0033	0.0055		0.0053	0.0035	0.0028	0.0035	0.0033	0.004	0.0037	0.0049
FFA	FFA[FA12:0]	uM	0.2537	0.4888	0.2681	0.3457	0.3319	0.5115	0.301	0.3552	0.666	0.3618	0.467	0.3574	0.3238	0.4502	0.2718	0.2669	0.2481	0.3275	0.3154	0.3343	0.4192
FFA	FFA[FA14:0]	uM	0.6793	1.1167	0.6652	0.8479	0.8288	1.3366	0.7282	0.9817	1.7336	1.1497	1.3484	1.0459	0.9343	1.3449	0.6955	0.7008	0.6234	0.8251	0.7902	0.8477	1.0236
FFA	FFA[FA14:1]	uM	0.1505	0.2722	0.162	0.1915	0.1945	0.2873	0.1743	0.241	0.3869	0.241	0.3038	0.2254	0.2097	0.2668	0.1678	0.1667	0.1346	0.1996	0.204	0.2035	0.2387
FFA	FFA[FA15:0]	uM	0.421	0.7367	0.4172	0.4994	0.5171	0.814	0.498	0.5335	0.9617	0.6611	0.7555	0.6131	0.5577	0.8011	0.4079	0.3961	0.3522	0.5202	0.4737	0.4979	0.6417
FFA	FFA[FA16:0]	uM	10.808	15.2579	9.8274	12.3391	12.2864	20.4003	11.2063	15.0837	19.9898	15.8099	18.1751	16.7927	15.5985	16.8164	10.9155	11.3809	9.1312	12.0953	12.2055	13.4622	14.2496
FFA	FFA[FA16:1]	uM	0.6998	0.8518	0.4738	0.6286	0.664	1.2734	0.5274	0.9593	1.8791	2.2671	1.9378	1.5009	1.0252	0.8911	0.5044	0.5937	0.3866	0.5178	0.5293	0.8475	0.6573
FFA	FFA[FA17:0]	uM	0.322	0.4509	0.3193	0.3849	0.3917	0.5533	0.3503	0.4053	0.5509	0.4749	0.5136	0.4644	0.4236	0.5408	0.347	0.3255	0.2991	0.365	0.4099	0.4142	0.4508
FFA	FFA[FA18:0]	uM	5.6507	6.1084	5.1942	6.2151	5.9554	8.3809	5.2292	7.1611	6.6871	6.8085	6.9172	6.6783	7.2358	10.0764	6.0763	5.6148	5.3653	6.166	6.5971	6.5149	6.9907
FFA	FFA[FA18:1]	uM	2.7226	3.7131	2.4273	3.0299	3.2903	5.9132	2.9449	4.2513	6.2773	6.3237	6.9359	6.2843	4.4194	3.1461	2.3508	2.9393	1.9138	2.6747	3.2202	4.1504	3.5105
FFA	FFA[FA18:2]	uM	3.2927	5.0346	3.7828	4.3269	4.7283	8.4848	4.3003	6.3495	9.1828	7.2074	9.656	8.2709	6.8244	4.2342	3.6234	4.8812	2.5598	3.9003	4.7224	5.8082	5.3971
FFA	FFA[FA18:4]	uM	0.0776	0.1121	0.0834	0.098	0.1081	0.1524	0.0773	0.1196	0.1477	0.1143	0.1542	0.1289	0.1158	0.1062	0.095	0.0984	0.0717	0.0915	0.115	0.1273	0.1283
FFA	FFA[FA20:0]	uM	0.1849	0.2025	0.1672	0.19	0.2024	0.2766	0.1834	0.233	0.2173	0.2571	0.2412	0.2278	0.2241	0.2779	0.2052	0.1676	0.1684	0.1838	0.2297	0.2426	0.2308
FFA	FFA[FA20:1]	uM	0.125	0.1261	0.1035	0.1192	0.1254	0.1804	0.1249	0.148	0.2049	0.3079	0.2055	0.1912	0.1462	0.1255	0.1091	0.1051	0.0954	0.1085	0.137	0.1521	0.1423
FFA	FFA[FA20:2]	uM	0.1733	0.1329	0.1165	0.1279	0.1266	0.1827	0.1519	0.1404	0.2332	0.3221	0.2296	0.2163	0.1555	0.1295	0.1172	0.0969	0.1019	0.1297	0.1401	0.1456	0.1381
FFA	FFA[FA20:3]	uM	0.4871	0.3696	0.3077	0.3734	0.3861	0.3369	0.2491	0.2649	0.3571	0.4508	0.3773	0.3455	0.3092	0.2521	0.3383	0.2419	0.2572	0.3427	0.3254	0.2969	0.3083
FFA	FFA[FA20:4]	uM	2.1865	2.1707	1.7904	2.2446	2.2514	2.1459	1.8111	1.4909	1.5771	2.0765	1.781	1.8442	1.993	1.5236	1.834	1.7747	1.5401	1.8494	1.8777	1.5797	1.8768
FFA	FFA[FA20:5]	uM	0.7151	0.647	0.6155	0.6382	0.6559	0.7396	0.6161	0.7231	0.6639	0.6724	0.8801	0.7323	0.7449	0.5702	0.6342	0.7372	0.4474	0.545	0.6494	0.6697	0.7283
FFA	FFA[FA22:0]	uM	0.1086	0.1018	0.0952	0.1187	0.1194	0.1681	0.1138	0.146	0.1345	0.1608	0.1567	0.153	0.1453	0.1602	0.1206	0.1129	0.1052	0.1132	0.1527	0.157	0.1618
FFA	FFA[FA22:1]	uM	0.2962	0.3011	0.2998	0.3589	0.3415	0.5184	0.2637	0.5404	0.4267	0.4745	0.5745	0.4959	0.497	0.5993	0.3455	0.3799	0.3277	0.3119	0.4243	0.4768	0.4874
FFA	FFA[FA22:2]	uM	0.044	0.0474	0.0377	0.0475	0.046	0.0698	0.0371	0.0649	0.082	0.1021	0.0934	0.0787	0.0644	0.0646	0.0463	0.0455	0.0401	0.0433	0.0605	0.0633	0.0619
FFA	FFA[FA22:4]	uM	0.0754	0.0872	0.068	0.0893	0.0943	0.1615	0.0881	0.1214	0.1453	0.1888	0.1455	0.1355	0.1121	0.0958	0.0823	0.0884	0.0678	0.0841	0.1082	0.1144	0.1223
FFA	FFA[FA22:5]	uM	0.2843	0.3037	0.2516	0.3171	0.3452	0.5174	0.3767	0.4658	0.5409	0.5837	0.5477	0.5015	0.4629	0.3452	0.2732	0.3738	0.2166	0.3026	0.3749	0.428	0.4394
FFA	FFA[FA22:6]	uM	2.1781	1.7838	1.6952	1.9058	2.0648	2.6316	2.7782	2.0655	2.8098	2.7073	2.8308	2.7607	2.5812	1.7671	1.589	2.0882	1.2998	1.9593	2.0725	2.0501	2.1288
FFA	FFA[FA24:0]	uM	0.0577	0.0523	0.0528	0.064	0.0642	0.0733	0.0537	0.0766	0.0564	0.0834	0.0673	0.0673	0.0727	0.086	0.0651	0.0559	0.0545	0.0598	0.1424	0.0742	0.0777
FFA	FFA[FA24:1]	uM	0.1716	0.1598	0.1623	0.1933	0.1795	0.2318	0.1388	0.2643	0.1801	0.2081	0.2304	0.1969	0.2563	0.3806	0.2093	0.1925	0.199	0.1948	0.2457	0.2394	0.245
HCER	HCER[FA14:0]	uM			0.0004	0.0005	0.0005		0.0005		0.0006			0.0005	0.0006	0.0004	0.0004		0.0003	0.0004		0.0005
HCER	HCER[FA16:0]	uM	0.0237	0.0404	0.0214	0.0476	0.0456	0.0651	0.0594	0.0387	0.084	0.0363	0.0597	0.0454	0.0664	0.0459	0.0215	0.0555	0.0201	0.0388	0.0369	0.0327	0.044
HCER	HCER[FA18:0]	uM	0.0017	0.0047	0.002	0.0048	0.0048	0.0109	0.0063	0.0085	0.008	0.0025	0.0088	0.0056	0.0086	0.0035	0.0019	0.0064	0.0017	0.0047	0.0038	0.0025	0.0043
HCER	HCER[FA18:1]	uM		0.0005	0.0005		0.0007	0.0008	0.0006	0.0006		0.0007	0.0007	0.0009	0.001	0.0005	0.0006	0.0005	0.0005	0.0006	0.0006	0.0004
HCER	HCER[FA20:0]	uM	0.0101	0.0266	0.0146	0.0264	0.0262	0.0327	0.0282	0.0277	0.0216	0.0141	0.0246	0.0216	0.0314	0.015	0.0126	0.0262	0.009	0.0204	0.018	0.0121	0.0212
HCER	HCER[FA20:1]	uM		0.0005		0.0006	0.0006	0.0009	0.0008	0.001	0.0009	0.0007	0.0008	0.0008	0.0008	0.0005	0.0005	0.0006		0.0008	0.0006		0.0004
HCER	HCER[FA22:0]	uM	0.1021	0.177	0.1104	0.1806	0.1786	0.1156	0.1733	0.0932	0.115	0.1075	0.0872	0.1007	0.1119	0.0856	0.1029	0.1343	0.0615	0.1239	0.104	0.0914	0.1353
HCER	HCER[FA22:1]	uM	0.0044	0.0097	0.0053	0.0114	0.0114	0.0064	0.0091	0.0074	0.0067	0.0088	0.0064	0.0068	0.0075	0.0038	0.0047	0.0086	0.003	0.0057	0.0054	0.0056	0.0075
HCER	HCER[FA24:0]	uM	0.0556	0.0641	0.042	0.064	0.0626	0.0432	0.0748	0.0324	0.0535	0.0508	0.0383	0.0387	0.0457	0.0434	0.0471	0.0462	0.0383	0.0587	0.0467	0.0456	0.0514
HCER	HCER[FA24:1]	uM	0.0289	0.0515	0.0313	0.0596	0.0613	0.0293	0.0463	0.0217	0.0343	0.0395	0.0281	0.0258	0.0341	0.0281	0.0327	0.0433	0.0215	0.0357	0.0294	0.0289	0.0408
HCER	HCER[FA26:0]	uM	0.0003			0.0003	0.0005	0.0005	0.0004					0.0007	0.0009								0.0004
HCER	HCER[FA26:1]	uM			0.0002		0.0005	0.0007				0.0007		0.0006	0.0008	0.0003	0.0004				0.0005	0.0004	0.0005
LCER	LCER[FA14:0]	uM	0.0007		0.0004	0.0008	0.0008			0.0004			0.0005		0.0006	0.0008	0.0005		0.0006		0.0008	0.0005	0.0006
LCER	LCER[FA16:0]	uM	0.0028	0.0025	0.002	0.0024	0.0028	0.003	0.0022	0.0019	0.0032	0.0029	0.0023	0.0028	0.0022	0.0023	0.0016	0.0016	0.0019	0.0026	0.0025	0.0021	0.0021
LCER	LCER[FA18:0]	uM	0.0017	0.0019	0.0015	0.0018	0.0019	0.0019	0.0017	0.0021	0.0018	0.0018	0.0015	0.0021	0.0015	0.0018	0.0019	0.0015	0.0015	0.0018	0.0024	0.0018	0.0022
LCER	LCER[FA18:1]	uM	0.0075	0.011	0.0094	0.0083	0.0101	0.0065	0.0059	0.0057	0.0068	0.0076	0.0061	0.0059	0.0051	0.0086	0.0081	0.006	0.0083	0.0087	0.0102	0.0078	0.0095
LCER	LCER[FA20:0]	uM	0.0011	0.0011	0.0011	0.0013	0.0015	0.0018	0.0016	0.0016	0.0013	0.0017	0.0013	0.0019	0.0016	0.0014	0.0016	0.0013	0.0011	0.0016	0.0016	0.0015	0.001
LCER	LCER[FA20:1]	uM	0.001	0.0011	0.0007	0.0009	0.0013	0.0008	0.0011	0.001	0.001	0.0009	0.0009	0.0011	0.0007	0.001	0.0008	0.0008	0.0007	0.001	0.0013	0.001	0.001
LCER	LCER[FA22:0]	uM	0.0067	0.0089	0.0065	0.0078	0.0079	0.0103	0.0124	0.0101	0.0135	0.0103	0.0097	0.0098	0.0102	0.0101	0.0065	0.0085	0.0045	0.008	0.0115	0.0103	0.0112
LCER	LCER[FA22:1]	uM	0.0008	0.0011	0.0009	0.0015	0.0013	0.0021	0.0016	0.0018	0.0021	0.0016	0.002	0.0016	0.0018	0.0014	0.0013	0.0016	0.0008	0.0014	0.0019	0.0021	0.002
LCER	LCER[FA24:0]	uM	0.0032	0.004	0.0026	0.0024	0.0031	0.002	0.0044	0.0019	0.0027	0.0029	0.0017	0.0024	0.0016	0.0023	0.0031	0.0016	0.0023	0.0027	0.0028	0.0019	0.0023
LCER	LCER[FA24:1]	uM	0.0021	0.0029	0.0028	0.0031	0.0033	0.0017	0.0031	0.0014	0.0019	0.0026	0.0016	0.0021	0.0016	0.0016	0.0029	0.0017	0.0017	0.0024	0.0025	0.0016	0.002
LCER	LCER[FA26:0]	uM					0.0005							0.0004							0.0006
LCER	LCER[FA26:1]	uM
LPC	LPC[FA14:0]	uM
LPC	LPC[FA15:0]	uM
LPC	LPC[FA16:0]	uM	0.4928	0.468	0.3455	0.4924	0.4587	0.3362	0.3101	0.3108	0.1838	0.2385	0.214	0.3471	0.3403	0.3284	0.4051	0.4125	0.4606	0.5163	0.4344	0.4247	0.4609
LPC	LPC[FA16:1]	uM
LPC	LPC[FA17:0]	uM
LPC	LPC[FA18:0]	uM	0.3929	0.5255	0.3783	0.4698	0.4174	0.246	0.2642	0.263	0.1799	0.1624	0.1681	0.2762	0.3035	0.2557	0.3844	0.3877	0.4109	0.5385	0.4652	0.3705	0.4957
LPC	LPC[FA18:1]	uM	0.0569	0.0659	0.0321	0.0479	0.0681	0.0316	0.0322	0.0333	0.035	0.0346	0.0275	0.0349	0.0401	0.0358	0.0418	0.0314	0.0541	0.0474	0.0419	0.0442	0.044
LPC	LPC[FA18:2]	uM	0.0505	0.0715	0.0379	0.0479	0.0554	0.0307	0.0322	0.0416	0.04	0.04	0.0426	0.0385	0.0468	0.0477	0.0459	0.0433	0.0506	0.0678	0.0471	0.0401	0.0554
LPC	LPC[FA18:3]	uM
LPC	LPC[FA20:0]	uM	0.0379	0.0492	0.0318	0.0479	0.0446	0.0267	0.0255	0.0262	0.0543	0.0373	0.0369	0.0376	0.0304	0.044	0.0276	0.032	0.0427	0.0409	0.0475	0.0377	0.0423
LPC	LPC[FA20:1]	uM
LPC	LPC[FA20:2]	uM
LPC	LPC[FA20:3]	uM	0.0177																0.0115	0.0136
LPC	LPC[FA20:4]	uM	0.0173	0.0258	0.0146	0.0264	0.0181		0.0123			0.019			0.0122		0.013	0.0201	0.0167	0.017	0.0164	0.0121	0.0244
LPC	LPC[FA20:5]	uM
LPC	LPC[FA22:4]	uM
LPC	LPC[FA22:5]	uM
LPC	LPC[FA22:6]	uM	0.023	0.0358	0.0192	0.0248	0.0333		0.0245	0.0202	0.024	0.0217	0.016	0.0149	0.027		0.0168	0.0174	0.0209	0.0222	0.026	0.0189	0.0209
LPE	LPE[FA16:0]	uM	0.1225	0.1244	0.1055	0.108	0.1212	0.1278	0.1135	0.1316	0.0737	0.0662	0.1038	0.1589	0.1313	0.1304	0.1151	0.1304	0.1189	0.1391	0.1429	0.1329	0.1294
LPE	LPE[FA16:1]	uM
LPE	LPE[FA17:0]	uM	0.0022	0.0024	0.0025		0.0024		0.0027					0.0021			0.0023	0.0024	0.002	0.003
LPE	LPE[FA18:0]	uM	0.2088	0.2476	0.2144	0.2038	0.2102	0.1885	0.1836	0.1997	0.1208	0.0928	0.1314	0.2391	0.216	0.1936	0.2322	0.203	0.2033	0.257	0.2255	0.1999	0.2045
LPE	LPE[FA18:1]	uM	0.0171	0.0199	0.0179	0.0169	0.0179	0.0103	0.0104	0.0126	0.0116	0.0145	0.014	0.0148	0.0154	0.0126	0.017	0.0153	0.0161	0.0189	0.0167	0.0158	0.0166
LPE	LPE[FA18:2]	uM	0.0068	0.0075	0.0048	0.0069	0.0058	0.0045	0.0062	0.0072	0.0081	0.008	0.0087	0.0079	0.0062	0.0039	0.0058	0.0044	0.0044	0.0057	0.0054	0.0051	0.005
LPE	LPE[FA20:0]	uM	0.0043	0.0049	0.0051	0.0038	0.0042	0.0035	0.0032	0.0018	0.0037	0.0035	0.003	0.0041	0.0036	0.0052	0.0047	0.0027	0.0035	0.0048	0.0035	0.0036
LPE	LPE[FA20:1]	uM	0.0038	0.0048	0.0038	0.0032	0.0034		0.0029	0.002		0.0043		0.0036	0.0021	0.0029	0.0034	0.0029	0.0043	0.003	0.0025	0.0031	0.0029
LPE	LPE[FA20:2]	uM	0.0021												0.0019				0.001
LPE	LPE[FA20:3]	uM	0.0032	0.0047	0.0024	0.0042	0.0029		0.0026	0.0017	0.0038	0.0033					0.0024	0.0019	0.0017	0.0039	0.0022	0.0025
LPE	LPE[FA20:4]	uM	0.0198	0.0243	0.013	0.0228	0.022	0.0116	0.0153	0.0132	0.0143	0.0202	0.0136	0.0138	0.0173	0.0135	0.0136	0.0146	0.0155	0.0191	0.0186	0.0161	0.0172
LPE	LPE[FA22:4]	uM
LPE	LPE[FA22:5]	uM	0.0035		0.0022		0.0021	0.0031	0.0021	0.0024	0.0038	0.0035	0.0046	0.0035	0.0036	0.0017	0.002	0.0022	0.002	0.0022		0.0025	0.003
LPE	LPE[FA22:6]	uM	0.0312	0.0252	0.0158	0.0212	0.0222	0.0225	0.0234	0.0182	0.0237	0.018	0.0199	0.0262	0.0297	0.019	0.0183	0.0163	0.0127	0.0203	0.0133	0.0156	0.0139
MAG	MAG[FA12:0]	uM	0.0046	0.0064	0.0053	0.005	0.0044	0.0061	0.0048	0.006	0.0058	0.0067	0.0086	0.0063	0.0052	0.0058	0.0057	0.0051	0.0052	0.0055	0.0069	0.0057	0.0073
MAG	MAG[FA14:0]	uM	0.0198	0.0429	0.0119	0.0253	0.0166	0.0258	0.0265	0.0621	0.0392	0.0231	0.0224	0.0497	0.0287	0.0226	0.0164	0.0246	0.0147	0.0236	0.0119	0.019	0.0235
MAG	MAG[FA14:1]	uM	0.0032	0.0037	0.0024	0.0035	0.0028	0.0036	0.0032	0.0028	0.0027	0.0044	0.0036	0.0042	0.0034	0.0042	0.0029	0.0022	0.0023	0.0044	0.0032	0.0021	0.0037
MAG	MAG[FA15:0]	uM	0.1244	0.1838	0.1278	0.1402	0.1327	0.1637	0.1471	0.1488	0.1748	0.143	0.1564	0.1357	0.1246	0.1842	0.149	0.1142	0.1081	0.1372	0.1425	0.1191	0.1889
MAG	MAG[FA16:0]	uM	0.1224	0.3211	0.0699	0.1842	0.1239	0.2454	0.2408	0.5432	0.3762	0.1607	0.1585	0.4321	0.2333	0.1767	0.1055	0.1842	0.0985	0.1559	0.0635	0.1287	0.2164
MAG	MAG[FA16:1]	uM	0.0144	0.0206	0.0123	0.0125	0.0153	0.0189	0.0156	0.0166	0.0259	0.0196	0.0261	0.0206	0.0137	0.0253	0.0177	0.0153	0.0127	0.0135	0.0161	0.0147	0.0181
MAG	MAG[FA17:0]	uM	0.0113	0.0264	0.0062	0.0131	0.0108	0.0206	0.0215	0.0499	0.032	0.0124	0.0107	0.0313	0.0195	0.0182	0.0078	0.0169	0.0086	0.0132	0.0056	0.0124	0.0194
MAG	MAG[FA18:0]	uM	0.2474	0.6791	0.1359	0.3987	0.2691	0.4712	0.5424	1.2512	0.7639	0.2995	0.2564	0.9089	0.4668	0.3404	0.2163	0.4228	0.2063	0.3306	0.102	0.2556	0.4663
MAG	MAG[FA18:1]	uM	0.0243	0.0341	0.0138	0.0339	0.0243	0.1216	0.0314	0.0557	0.1718	0.144	0.1432	0.193	0.0679	0.0338	0.012	0.0409	0.0112	0.0248	0.0318	0.053	0.0631
MAG	MAG[FA18:2]	uM	0.0209	0.0304	0.0171	0.0449	0.0316	0.1128	0.0344	0.064	0.1964	0.126	0.1629	0.213	0.0979	0.0377	0.0132	0.0522	0.0095	0.0272	0.0266	0.0499	0.0738
MAG	MAG[FA18:3]	uM	0.0026	0.0035	0.002	0.0034	0.0031	0.0076	0.0028	0.0043	0.0071	0.0039	0.008	0.0095	0.0061	0.0041	0.0021	0.0027	0.0024	0.0028	0.0044	0.004	0.0044
MAG	MAG[FA18:4]	uM	0.0022			0.0015	0.0013										0.0019	0.0014			0.0025
MAG	MAG[FA20:0]	uM	0.0056	0.008	0.004	0.004	0.0043	0.0062	0.0065	0.0136	0.01	0.0052	0.0048	0.0105	0.0063	0.0055	0.0039	0.0046	0.0035	0.0046	0.0044	0.0052	0.0067
MAG	MAG[FA20:1]	uM	0.0021		0.0018	0.0021	0.0022	0.0045	0.0026	0.0031	0.0087	0.0085	0.0062	0.0049	0.0031	0.0025	0.0022	0.0024	0.0018	0.0027	0.0033	0.003	0.0044
MAG	MAG[FA20:2]	uM		0.0034	0.0024	0.002	0.0021	0.0035	0.0023	0.0023	0.0052	0.0041	0.0047	0.0044	0.0024	0.0031	0.0015	0.0023			0.0036	0.0026	0.0025
MAG	MAG[FA20:3]	uM	0.0022	0.0028	0.0017	0.0031	0.0021		0.0026	0.0024	0.0045	0.0058	0.0025	0.0051	0.0028	0.0024	0.0019	0.002	0.0018	0.0021	0.0022		0.0029
MAG	MAG[FA20:4]	uM	0.0031	0.004	0.0032	0.0036	0.0033	0.005	0.0039	0.0054	0.0085	0.0076	0.0058	0.01	0.0047	0.0026	0.003	0.0019	0.0018	0.0023	0.0029	0.0032	0.0032
MAG	MAG[FA20:5]	uM	0.0021	0.0034	0.0015	0.0019	0.0019	0.0038	0.0029	0.0023		0.0033	0.0033	0.0027	0.0029	0.0021	0.0021	0.0024	0.002	0.0026	0.0033	0.003	0.0029
MAG	MAG[FA22:0]	uM		0.0035	0.0016	0.0022	0.0026	0.0043	0.0022	0.003	0.003		0.0034	0.0026	0.0033	0.0027	0.0024	0.002	0.002	0.0022	0.0027		0.0029
MAG	MAG[FA22:1]	uM	0.0151	0.0093	0.006	0.0056	0.0068	0.0104	0.012	0.009	0.0098	0.0146	0.0093	0.0157	0.0125	0.0076	0.0049	0.0052	0.0059	0.0076	0.0074	0.0072	0.0069
MAG	MAG[FA22:2]	uM	0.0227	0.0166	0.0129	0.0129	0.0113	0.017	0.0232	0.0156	0.0218	0.0259	0.0243	0.0315	0.0288	0.0114	0.0085	0.0112	0.0104	0.0145	0.0169	0.0141	0.0121
MAG	MAG[FA22:4]	uM
MAG	MAG[FA22:5]	uM	0.0034	0.004	0.0023	0.0038	0.0026	0.0039	0.0044	0.0074	0.0064	0.0033	0.0035	0.0081	0.0067	0.0042	0.0036	0.0043	0.0019	0.0041	0.0028	0.0034	0.0038
MAG	MAG[FA22:6]	uM	0.0028	0.0038	0.0026	0.0046	0.0035	0.0056	0.0047	0.005	0.0108	0.0069	0.007	0.0088	0.0063	0.0049	0.0024	0.0042	0.0018	0.0039	0.0035	0.0035	0.0062
MAG	MAG[FA24:0]	uM	0.0017	0.0022	0.0018								0.0036			0.0026	0.0019	0.0012	0.0011	0.0019	0.0018	0.0015	0.0025
MAG	MAG[FA24:1]	uM	0.0015	0.003	0.0019	0.0022		0.0029	0.0016		0.0026	0.0029		0.0021		0.0016	0.002		0.0018	0.0015	0.0019		0.003
PC	PC[FA12:0]	uM	0.9053	0.8301	0.8102	0.6781	0.6115	0.5585	0.8732	0.8068	1.1267	0.7166	0.909	0.6622	0.7525	0.7269	0.7319	0.7236	0.6319	0.6904	0.7862	0.6892	0.7412
PC	PC[FA14:0]	uM	0.5775	0.3579	0.3148	0.306	0.3512	0.5035	0.451	0.4294	0.7484	0.6781	0.6945	0.6173	0.5207	0.3626	0.351	0.3946	0.3247	0.3814	0.3447	0.4204	0.3691
PC	PC[FA14:1]	uM	0.1485	0.1733	0.0696	0.1438	0.1066	0.095	0.1902	0.1584	0.1482	0.0974	0.2132	0.178	0.1671	0.0908	0.1345	0.1349	0.1148	0.1262	0.1311	0.0329	0.0246
PC	PC[FA15:0]	uM	0.3204	0.3083	0.1655	0.199	0.2017	0.2104	0.2883	0.1969	0.169	0.2474	0.2073	0.2891	0.3065	0.1748	0.267	0.2566	0.2268	0.2799	0.2064	0.2092	0.2088
PC	PC[FA16:0]	uM	116.967	104.897	78.5977	94.6987	91.9304	123.557	117.642	106.578	130.604	137.719	126.606	150.86	139.558	108.018	90.3461	97.3124	77.6024	111.713	97.481	104.444	101.866
PC	PC[FA16:1]	uM	3.359	2.4846	1.4489	1.9601	1.7795	2.7968	2.4591	3.1026	5.0192	7.4218	4.3979	4.292	3.4734	2.1415	1.9581	1.7525	1.6673	1.8737	1.5896	2.6034	1.7872
PC	PC[FA17:0]	uM	0.706	0.6925	0.5539	0.545	0.5222	0.527	0.6429	0.4864	0.8446	0.6555	0.7189	0.7011	0.6146	0.4435	0.6007	0.5481	0.5207	0.6406	0.5884	0.3293	0.5321
PC	PC[FA18:0]	uM	35.637	35.8355	30.2357	31.6142	31.3381	34.1903	32.3541	32.9276	32.4519	24.3257	33.6596	37.6994	36.3487	27.8285	31.19	30.7103	28.2732	35.6727	33.0145	26.693	33.2998
PC	PC[FA18:1]	uM	33.8649	26.2926	18.9487	21.8877	23.2665	30.581	29.8126	26.0172	35.7306	43.6406	32.6413	36.8986	32.1682	27.4479	22.9282	19.4114	21.1036	25.771	21.6537	25.9552	22.0754
PC	PC[FA18:2]	uM	75.0446	77.9415	66.7572	70.0479	66.0601	92.7707	93.2766	84.2925	113.117	102.5	105.37	112.022	106.659	78.9341	70.4378	73.037	60.0952	86.6891	78.9277	79.1515	77.5568
PC	PC[FA18:3]	uM	1.6141	1.3378	1.0364	1.135	1.1303	1.3879	1.0451	1.2875	2.4469	1.8283	2.1043	1.7738	1.5632	1.1659	1.0899	1.0983	0.9874	1.2722	1.0553	1.15	1.1622
PC	PC[FA20:0]	uM	2.2834	1.8651	1.5905	1.6638	1.6622	1.7792	1.8278	1.7157	2.1158	2.2346	1.8988	2.1791	2.1305	1.8314	1.6528	1.6974	1.5428	1.9854	1.6007	1.7565	1.7083
PC	PC[FA20:1]	uM	0.2041	0.1364	0.1455	0.1264	0.1318	0.1521	0.101	0.1155	0.1536	0.244	0.1166	0.1778	0.0926	0.1342	0.1579	0.1092	0.1363	0.1225	0.1263	0.1585	0.0984
PC	PC[FA20:2]	uM	0.4611	0.3763	0.2426	0.3363	0.2991	0.1701	0.2136	0.1685	0.2684	0.3414	0.1724	0.2748	0.2198	0.214	0.3154	0.188	0.2494	0.3562	0.269	0.222	0.2603
PC	PC[FA20:3]	uM	5.3887	4.0783	3.0816	3.6012	4.0116	1.8204	1.7014	1.6937	2.5476	3.4597	2.1944	2.6031	1.8749	2.0091	3.5211	2.0348	3.0331	3.8667	2.684	2.4748	2.8039
PC	PC[FA20:4]	uM	23.1452	26.4345	17.4022	24.6085	24.5894	18.2587	17.3708	14.8545	18.5315	25.5795	17.6668	22.9367	19.9362	16.1893	17.9272	20.8987	18.5854	21.8268	20.5531	19.0689	23.5792
PC	PC[FA20:5]	uM	3.7489	3.3787	2.109	2.8158	2.6407	1.7349	2.2286	2.5226	2.1781	1.6792	2.3585	2.4166	2.3269	1.7153	2.2665	2.778	2.1255	2.2023	2.8186	1.9222	2.4325
PC	PC[FA22:4]	uM	0.1927	0.165	0.0941	0.1107	0.1479	0.152	0.1506	0.1805	0.1701	0.189	0.169	0.2454	0.1808	0.1348	0.1029	0.1183	0.1247	0.118	0.1192	0.1243	0.1324
PC	PC[FA22:5]	uM	2.0688	1.7629	1.0997	1.479	1.4192	1.6788	1.7555	1.775	1.5119	1.4905	1.609	2.2628	2.137	1.4523	1.3731	1.5197	1.0957	1.4968	1.3487	1.5081	1.5467
PC	PC[FA22:6]	uM	34.5024	28.8156	19.4129	24.6353	23.9599	29.9025	27.7307	26.954	26.7189	25.0532	29.7268	35.3328	32.0042	27.7452	23.6431	27.7781	20.2796	30.4799	26.6166	23.8981	28.7306
PE	PE[FA14:0]	uM	0.0265									0.0141					0.0046	0.0066
PE	PE[FA15:0]	uM	0.0479	0.0299	0.0303	0.0297	0.0341	0.0431	0.0428	0.0291	0.0368	0.0397	0.0483	0.0644	0.0455	0.0345	0.0337	0.0304	0.0301	0.0268	0.023	0.0266	0.0311
PE	PE[FA16:0]	uM	54.1922	38.2743	26.8468	33.557	34.1168	48.1492	55.3162	50.4069	50.7662	52.9276	44.9747	61.0677	58.3918	39.721	32.269	37.0465	27.3177	45.2857	34.4804	38.774	36.5832
PE	PE[FA16:1]	uM	0.1493	0.1454	0.0898	0.1181	0.1118	0.1271	0.1069	0.1617	0.3222	0.5443	0.2629	0.238	0.1666	0.104	0.108	0.0869	0.0903	0.0883	0.0877	0.1313	0.1048
PE	PE[FA17:0]	uM	0.5651	0.4212	0.4242	0.3487	0.4129	0.5051	0.7841	0.4743	0.9491	0.7485	0.7385	0.7684	0.6277	0.4189	0.4407	0.4599	0.4314	0.3758	0.4217	0.3918	0.4228
PE	PE[FA18:0]	uM	69.3513	60.8997	43.9919	48.4846	52.8611	77.9715	78.5056	72.5859	84.9232	68.8788	66.8969	78.3719	86.8986	55.1545	53.6868	57.7919	42.8809	62.5635	55.1434	56.2295	53.9736
PE	PE[FA18:1]	uM	16.579	14.9299	9.5819	12.3912	13.3158	12.0931	15.7898	12.9864	24.0507	27.4652	16.6112	15.9385	15.9548	11.3315	11.1597	12.4642	9.6274	14.687	12.3299	12.5928	12.5555
PE	PE[FA18:2]	uM	13.4704	14.4894	12.4502	11.4084	11.2108	16.8062	17.7223	17.5081	29.3189	23.3476	23.4146	22.2616	18.6776	14.3684	12.8907	11.9284	11.0986	13.5901	13.0857	14.175	12.3529
PE	PE[FA18:3]	uM	0.305	0.2076	0.1992	0.1915	0.2006	0.3677	0.2198	0.488	0.7837	0.7141	0.8801	0.5827	0.3719	0.2473	0.1898	0.22	0.1708	0.242	0.2105	0.2485	0.2176
PE	PE[FA20:1]	uM	0.1597	0.1441	0.0931	0.1064	0.0922	0.1709	0.0936	0.1307	0.1999	0.2428	0.1009	0.1752	0.0952	0.1004	0.1139	0.1095	0.0963	0.1205	0.0887	0.1141	0.1086
PE	PE[FA20:2]	uM	0.1893	0.1665	0.1273	0.121	0.1251	0.1091	0.1106	0.1182	0.2733	0.3556	0.1594	0.1886	0.1373	0.1176	0.1559	0.1004	0.108	0.1427	0.111	0.1451	0.1509
PE	PE[FA20:3]	uM	2.1692	1.7196	1.2202	1.5253	1.6787	1.4118	1.2956	1.182	1.6502	2.212	1.4895	1.8801	1.5823	1.2357	1.3446	0.9719	1.2185	1.5082	1.3907	1.4073	1.3325
PE	PE[FA20:4]	uM	46.3235	42.7041	28.0285	34.2794	39.7374	50.2727	46.6357	40.3921	50.6802	52.914	44.1609	44.6419	52.0666	33.0374	35.1743	37.9086	29.2695	36.209	36.2237	34.9919	36.1229
PE	PE[FA20:5]	uM	4.2912	3.321	4.4333	3.5804	3.1925	2.7074	4.083	4.7806	3.7576	3.4102	4.078	4.3105	3.7428	3.4084	4.3917	3.9487	3.5295	3.4112	4.5658	3.1483	3.7389
PE	PE[FA22:0]	uM	0.0067		0.0035														0.0039
PE	PE[FA22:1]	uM	0.0044		0.0045							0.0074			0.0087				0.0037
PE	PE[FA22:2]	uM								0.0077							0.0063					0.0092
PE	PE[FA22:4]	uM	0.3289	0.2132	0.0974	0.2201	0.2406	0.5619	0.3179	0.3444	0.4212	0.4767	0.3038	0.4355	0.4327	0.1935	0.1737	0.2072	0.142	0.2002	0.194	0.2223	0.2075
PE	PE[FA22:5]	uM	3.1389	1.6155	1.0301	1.8479	1.4271	2.8144	2.4501	2.7787	3.8168	2.1679	2.4088	3.4821	3.1245	1.7752	1.4214	1.8741	1.2231	2.0507	1.6983	1.9074	2.1699
PE	PE[FA22:6]	uM	70.4955	50.2003	33.9311	41.6186	43.0509	62.8855	78.8108	68.8379	75.8944	66.7576	54.4027	77.831	81.2874	52.0624	41.8741	51.1714	33.813	65.9241	45.6873	52.1418	47.7032
PI	PI[FA16:0]	uM	1.4796	1.0208	0.65	0.6074	0.6798	0.7676	0.8242	0.7563	0.8723	1.0937	0.6921	1.6638	0.9778	0.5516	0.6228	0.7176	0.831	0.672	0.6984	0.6824	0.7225
PI	PI[FA16:1]	uM	0.0139	0.0164	0.0059	0.0099	0.0075	0.0088	0.0071	0.0071	0.0177	0.0286	0.0129	0.0159	0.0114	0.0062	0.0074	0.0042	0.0089	0.0088	0.0093	0.0079	0.0124
PI	PI[FA18:0]	uM	9.2345	9.1496	6.5222	5.4735	6.8946	7.9634	6.656	6.3859	7.1021	6.1065	7.5149	11.4462	8.494	4.7593	6.1069	6.5838	6.888	5.5472	5.9973	4.9267	6.1485
PI	PI[FA18:1]	uM	0.6705	0.7044	0.406	0.3554	0.4244	0.2894	0.3188	0.2649	0.6481	1.0621	0.4786	0.4844	0.3737	0.2377	0.393	0.3464	0.5477	0.3212	0.4061	0.3574	0.3752
PI	PI[FA18:2]	uM	0.5411	0.8568	0.4582	0.4	0.4204	0.4985	0.3354	0.4693	0.7835	1.0023	0.7344	1.2274	0.591	0.2846	0.3812	0.3891	0.3758	0.3838	0.3939	0.3071	0.4142
PI	PI[FA18:3]	uM	0.0099	0.0132
PI	PI[FA20:2]	uM	0.02	0.0258	0.0198	0.0162	0.0158	0.0172	0.0116	0.0106	0.0136	0.0134	0.023	0.0211	0.0136		0.021	0.0118	0.0127	0.0147	0.0123	0.0149	0.0147
PI	PI[FA20:3]	uM	0.9119	0.742	0.4989	0.4402	0.5566	0.3356	0.2954	0.2849	0.3245	0.4147	0.4338	0.7424	0.4308	0.2868	0.4361	0.2496	0.4571	0.4701	0.3845	0.3245	0.377
PI	PI[FA20:4]	uM	9.1656	8.6493	6.1921	5.2065	6.5709	7.8093	6.701	6.1017	7.1093	6.3601	7.0193	10.7035	8.256	4.6571	5.871	6.6413	7.0506	5.2967	5.9233	5.0533	6.0456
PI	PI[FA20:5]	uM	0.1645	0.1055	0.1435	0.0851	0.098	0.1169	0.1043	0.1849	0.1277	0.0844	0.1701	0.2977	0.1247	0.0649	0.1401	0.1032	0.1114	0.0703	0.1046	0.0403	0.08
PI	PI[FA22:4]	uM	0.0489	0.0384	0.0195	0.0166	0.0324	0.018	0.023	0.02	0.023	0.0215	0.0258	0.0313	0.0288	0.0188	0.0222	0.0291	0.0198	0.0178	0.0172	0.0159	0.0292
PI	PI[FA22:5]	uM	0.0698	0.0314	0.034	0.045	0.0337	0.0299	0.0188	0.0341	0.046	0.0181	0.0314	0.0696	0.0358	0.021	0.0406	0.0332	0.0201	0.0222	0.0429	0.0284	0.0256
PI	PI[FA22:6]	uM	0.3152	0.2462	0.1569	0.1355	0.1824	0.0563	0.2092	0.166	0.1128	0.1685	0.0948	0.2589	0.2124	0.149	0.1458	0.1351	0.1396	0.1681	0.1458	0.1147	0.1692
SM	SM[FA14:0]	uM	0.0157	0.0166	0.0103	0.0138	0.0149	0.0315	0.0113	0.0327	0.0384	0.024	0.037	0.028	0.0319	0.0132	0.0098	0.0197	0.012	0.0154	0.0215	0.0152	0.0215
SM	SM[FA16:0]	uM	1.3778	1.516	1.0199	1.5722	1.4522	3.4148	1.8462	3.1009	2.7496	2.1742	3.1258	3.2503	3.9547	1.7591	1.0452	2.0796	1.5047	2.0588	2.4658	1.7693	2.0848
SM	SM[FA18:0]	uM	0.0779	0.1144	0.0641	0.122	0.1191	0.6627	0.1721	0.6157	0.4251	0.1536	0.6581	0.3906	0.5145	0.1797	0.0623	0.1791	0.0938	0.1636	0.2298	0.1019	0.1587
SM	SM[FA18:1]	uM	0.0041	0.0057	0.0034	0.0064	0.006	0.0153	0.0072	0.0141	0.0202	0.0107	0.0227	0.0136	0.0144	0.0057	0.0039	0.0075	0.0048	0.0058	0.0078	0.0056	0.0059
SM	SM[FA20:0]	uM	1.5622	1.4634	1.0444	1.4249	1.4056	3.1004	2.127	3.1549	2.5354	2.5544	3.0386	3.819	3.3892	1.7382	1.3472	1.8676	1.1722	1.7926	1.8899	2.1481	1.7204
SM	SM[FA20:1]	uM	0.0496	0.0505	0.0299	0.0426	0.0474	0.0891	0.0509	0.1023	0.1109	0.1322	0.1248	0.1256	0.1001	0.0418	0.04	0.0516	0.0318	0.0448	0.048	0.0594	0.0433
SM	SM[FA22:0]	uM	5.2248	5.3733	3.6847	4.8383	4.6968	6.8175	5.2489	6.0582	6.4225	5.684	6.0914	8.2488	6.4929	4.5804	4.0579	4.5433	4.0037	5.7132	5.586	5.0263	5.3762
SM	SM[FA22:1]	uM	0.628	0.7184	0.436	0.671	0.6412	0.8311	0.5527	0.9096	0.9457	1.2366	1.0958	1.2085	0.8766	0.4569	0.4715	0.5491	0.4887	0.5743	0.6293	0.6152	0.6236
SM	SM[FA24:0]	uM	3.08	2.6054	1.7586	2.5291	2.4448	2.9444	2.7389	2.7015	3.1078	3.1076	2.812	3.5567	3.0606	2.269	2.0216	2.0692	2.2829	2.9681	2.7019	2.6929	2.6972
SM	SM[FA24:1]	uM	3.1108	3.3309	2.1496	3.5023	3.3922	3.7919	2.764	3.2434	3.2856	4.1559	3.6525	4.6788	3.8734	2.2017	2.3184	2.9955	2.4812	3.125	3.2128	2.7683	3.4704
SM	SM[FA26:0]	uM	0.0189	0.0207	0.0147	0.0166	0.019	0.0261	0.0168	0.0198	0.0235	0.0244	0.0222	0.0233	0.0208	0.0188	0.0153	0.0186	0.0144	0.0183	0.0186	0.0206	0.0184
SM	SM[FA26:1]	uM	0.0247	0.0207	0.0172	0.0239	0.0199	0.0296	0.0161	0.0246	0.0281	0.0226	0.0282	0.0278	0.0244	0.0194	0.018	0.0216	0.0175	0.0177	0.024	0.0201	0.0281
TAG	TAG[FA12:0]	uM	0.0279	0.0705	0.0206	0.0537	0.0497	1.1568	0.174	1.1434	1.1106	0.3421	1.5329	0.9009	1.1809	0.1424	0.0296	0.1871	0.0212	0.0452	0.0823	0.3265	0.1243
TAG	TAG[FA14:0]	uM	0.3703	0.6198	0.1458	0.5977	0.5732	10.0237	1.0033	8.4574	6.6878	4.2525	12.8497	8.7546	9.0828	1.0903	0.2268	1.5383	0.1464	0.4497	0.6718	3.6058	1.3072
TAG	TAG[FA14:1]	uM	0.0288	0.0588	0.0235	0.0555	0.0507	1.5169	0.2103	1.4504	1.3626	0.6104	1.9799	1.1894	1.4694	0.1755	0.0352	0.1954	0.023	0.0479	0.0666	0.4551	0.1221
TAG	TAG[FA15:0]	uM	0.1591	0.2918	0.0891	0.2701	0.2604	2.5799	0.3334	1.8594	1.1343	1.0017	2.5897	2.4307	2.4876	0.4165	0.1199	0.5511	0.076	0.1977	0.2756	1.1603	0.5817
TAG	TAG[FA16:0]	uM	13.9622	29.4785	8.9555	32.3663	31.2275	260.083	35.8236	211.875	95.7966	85.4716	224.564	247.242	271.374	41.615	12.6838	70.3669	6.9857	23.621	33.1079	140.503	64.589
TAG	TAG[FA16:1]	uM	2.2702	4.3888	0.9499	4.3238	4.1799	45.6871	4.027	40.5709	26.2065	28.3796	56.6815	48.3608	47.386	5.2176	1.4847	8.9829	0.8223	2.5209	3.3163	23.4586	7.7598
TAG	TAG[FA17:0]	uM	0.147	0.2916	0.0968	0.2554	0.251	2.3549	0.4008	1.7256	1.1757	0.8292	2.5346	2.1137	2.0476	0.3981	0.1315	0.5598	0.0826	0.2089	0.2892	0.9176	0.5362
TAG	TAG[FA18:0]	uM	1.7209	3.0782	1.3876	2.9163	2.7913	23.1058	3.6687	16.5517	9.5617	7.0204	18.5111	19.7582	16.9178	4.1239	1.7769	4.982	1.2579	2.5181	3.3978	9.3742	5.1317
TAG	TAG[FA18:1]	uM	18.6489	38.1253	11.5556	38.0401	36.0941	323.665	42.0674	240.458	135.692	119.358	256.345	295.123	270.282	51.9435	16.7151	71.981	10.4906	28.3018	39.7874	155.32	72.6344
TAG	TAG[FA18:2]	uM	14.1086	37.0218	11.6875	39.5013	38.7461	365.737	49.5061	297.511	166.763	113.967	308.843	334.654	351.253	59.6165	16.2386	96.3423	8.8658	34.1008	50.2248	187.121	93.1632
TAG	TAG[FA18:3]	uM	1.5465	3.1584	1.0473	3.5824	3.568	33.1874	2.7689	29.014	14.8121	9.4232	32.7618	30.8772	37.69	4.2231	1.3541	8.6627	0.7688	2.6303	3.7736	17.9441	7.709
TAG	TAG[FA20:0]	uM	0.1423	0.2385	0.0919	0.2604	0.2527	2.0848	0.3173	1.5705	0.8853	0.8881	1.7379	2.1829	1.8819	0.4122	0.1291	0.5108	0.07	0.2072	0.3225	1.1244	0.5554
TAG	TAG[FA20:1]	uM	0.3926	0.7643	0.2391	0.7375	0.7209	5.8242	1.0429	5.0956	3.0931	4.1278	5.259	6.8679	4.9111	1.1925	0.3489	1.4494	0.2171	0.6088	0.8128	3.3069	1.5312
TAG	TAG[FA20:2]	uM	0.231	0.4392	0.1431	0.4476	0.4224	3.6736	0.5776	3.078	2.1728	2.6761	4.0269	4.1934	3.1983	0.6564	0.1903	0.8246	0.1242	0.3812	0.4746	1.8508	0.9136
TAG	TAG[FA20:3]	uM	0.5132	0.9247	0.3588	0.9674	0.9321	5.5923	0.8849	4.5689	3.2753	3.8019	5.9743	5.8462	5.1716	1.1655	0.4696	1.4302	0.3181	0.7524	0.9158	3.1146	1.6096
TAG	TAG[FA20:4]	uM	1.1455	1.7964	0.7619	2.0475	1.9945	14.7916	3.1274	11.586	7.1103	8.3032	12.1093	13.6642	15.7265	2.8179	0.9977	3.9593	0.6813	1.4256	1.9363	6.7808	3.5582
TAG	TAG[FA20:5]	uM	0.669	0.9633	0.397	1.3414	1.2973	10.2519	1.9265	10.8498	4.0125	3.2816	8.6509	10.2932	14.7112	1.5376	0.5198	3.9466	0.2457	0.6772	1.117	5.6539	2.3643
TAG	TAG[FA22:1]	uM	0.0171	0.0482	0.0132	0.0516	0.0487	0.5865	0.0647	0.4755	0.2624	0.1779	0.4751	0.5282	0.5069	0.0838	0.0199	0.1309	0.0116	0.047	0.0689	0.2818	0.1344
TAG	TAG[FA22:4]	uM	0.0926	0.1884	0.0503	0.2253	0.2099	1.9038	0.3177	1.5635	0.7391	1.084	1.2734	1.8025	1.8609	0.3027	0.0712	0.4701	0.0566	0.1574	0.2067	0.883	0.4439
TAG	TAG[FA22:5]	uM	0.6531	1.3718	0.4103	1.6299	1.5577	12.8428	2.6573	13.4857	6.5695	5.5594	11.0103	12.6903	15.6498	2.7004	0.5439	4.7619	0.3965	1.3078	2.0957	7.9785	4.0507
TAG	TAG[FA22:6]	uM	4.8594	9.5041	3.4356	11.1678	10.7833	72.7913	18.968	73.393	48.5126	39.2036	74.3749	74.4075	93.2298	19.4292	4.1517	30.6288	3.2599	9.9531	16.1346	49.9804	26.8306
Total	Total[FA12:0]	uM	1.1974	1.4099	1.1111	1.0942	1.0086	2.2552	1.3619	2.3389	2.9651	1.4543	2.9666	1.9593	2.2866	1.3413	1.0459	1.1975	0.9143	1.0748	1.2032	1.3766	1.3052
Total	Total[FA14:0]	uM	1.7522	2.2234	1.1889	1.862	1.8497	12.1679	2.2906	10.171	9.5601	6.4221	15.289	10.7691	10.8212	2.9177	1.3571	2.7939	1.1661	1.7605	1.9222	5.0737	2.859
Total	Total[FA14:1]	uM	0.3365	0.5148	0.2627	0.4	0.3603	1.9184	0.5858	1.8673	1.9152	0.9666	2.513	1.6131	1.8642	0.5474	0.346	0.5077	0.2792	0.3847	0.4189	0.7045	0.3991
Total	Total[FA15:0]	uM	1.1015	1.5863	0.8535	1.1719	1.1762	3.888	1.3428	2.8282	2.5581	2.1742	3.8492	3.6231	3.5965	1.6476	1.0038	1.3888	0.815	1.1883	1.1598	2.0753	1.7084
Total	Total[FA16:0]	uM	202.338	195.403	128.937	179.777	176.28	465.992	226.93	395.412	307.371	301.624	426.023	491.646	499.013	212.83	150.894	224.662	126.109	199.721	185.256	307.687	226.75
Total	Total[FA16:1]	uM	6.9343	8.7595	3.2825	7.7171	7.4029	51.9027	7.4103	46.2756	34.688	40.4126	64.7933	56.9229	54.2827	9.1999	4.4535	12.5709	3.3849	5.6689	6.6235	29.2407	11.6933
Total	Total[FA17:0]	uM	1.7739	1.9311	1.4253	1.5806	1.6228	4.0466	2.2151	3.1837	3.5602	2.7377	4.5336	4.1621	3.8103	1.8743	1.557	1.9768	1.3744	1.6475	1.8005	2.138	2.0379
Total	Total[FA18:0]	uM	123.158	117.642	88.7756	96.7429	101.715	154.916	128.369	139.222	143.383	114.681	135.96	157.494	158.776	103.749	100.305	107.799	86.1316	114.524	106.157	105.704	107.93
Total	Total[FA18:1]	uM	75.6185	90.1094	45.9617	80.8235	81.4582	388.532	94.5039	293.269	212.298	208.284	323.822	371.515	336.145	101.617	56.8376	114.895	47.136	77.7602	87.0032	211.386	121.856
Total	Total[FA18:2]	uM	109.872	141.717	98.9466	131.514	127.074	500.764	170.35	417.548	332.059	259.764	462.336	496.588	498.698	164.823	107.143	195.438	86.3547	144.792	156.938	299.886	200.38
Total	Total[FA18:3]	uM	3.6257	4.988	2.4314	5.1491	5.131	35.6294	4.1449	31.2922	18.5678	12.3042	36.265	33.9989	40.3963	5.903	2.7697	10.3925	2.0501	4.4036	5.4674	19.9787	9.6118
Total	Total[FA18:4]	uM	0.0829	0.1164	0.086	0.1027	0.1124	0.1554	0.0783	0.1232	0.1489	0.1155	0.1562	0.1332	0.1205	0.1094	0.0993	0.1043	0.0744	0.0953	0.1232	0.1324	0.1335
Total	Total[FA20:0]	uM	4.271	3.9111	2.991	3.6709	3.649	7.4211	4.576	6.8383	5.923	6.0476	7.0888	8.5819	7.7834	4.4051	3.4313	4.3745	3.0556	4.2978	4.2009	5.3941	4.3573
Total	Total[FA20:1]	uM	0.9664	1.2691	0.644	1.1737	1.1607	6.5085	1.4571	5.6648	3.8618	5.2085	5.8945	7.6482	5.4183	1.6495	0.8061	1.8792	0.6128	1.0545	1.2821	3.8785	1.9979
Total	Total[FA20:2]	uM	1.1038	1.1814	0.6778	1.0854	1.0223	4.2485	1.1017	3.5821	3.0931	3.8902	4.725	5.0119	3.7868	1.1607	0.8249	1.2648	0.6234	1.0662	1.062	2.4536	1.5385
Total	Total[FA20:3]	uM	9.6199	7.9807	5.5599	7.0513	7.7129	9.7348	4.5277	8.1521	8.4843	10.7121	10.7285	11.6939	9.541	5.0475	6.196	5.0382	5.375	7.0791	5.818	7.8068	6.5848
Total	Total[FA20:4]	uM	82.3758	82.243	54.4627	68.8892	75.635	94.109	76.0844	74.9368	85.5879	95.9547	83.2818	94.54	98.6795	58.6087	62.0744	71.6672	57.4125	66.9916	66.9548	68.0568	71.722
Total	Total[FA20:5]	uM	9.6765	8.5107	7.7634	8.5518	7.981	15.776	9.0668	19.2725	10.9297	9.2601	16.326	18.3151	21.9079	7.3814	8.0078	11.6566	6.5076	6.982	9.3637	11.6189	9.4801
Total	Total[FA22:0]	uM	5.9215	6.0287	4.2501	5.4845	5.3426	7.6962	6.1208	6.7233	7.0882	6.184	6.7321	9.0751	7.1967	5.3794	4.766	5.1148	4.4984	6.3327	6.1675	5.6263	6.0113
Total	Total[FA22:1]	uM	1.01	1.1322	0.8018	1.1447	1.0958	2.0205	0.9584	2.01	1.7046	1.9688	2.2264	2.3224	1.9741	1.2098	0.8965	1.1175	0.8814	0.9912	1.1814	1.4353	1.3095
Total	Total[FA22:2]	uM	0.0715	0.0714	0.0559	0.0678	0.0633	0.0947	0.0665	0.0957	0.1137	0.1368	0.1258	0.1194	0.1009	0.0827	0.0658	0.0646	0.056	0.0675	0.0913	0.095	0.0853
Total	Total[FA22:4]	uM	0.7446	0.7011	0.3345	0.6721	0.7351	2.8467	0.9112	2.2587	1.5461	2.0221	1.9566	2.6949	2.6435	0.7579	0.4573	0.9269	0.4164	0.5854	0.658	1.3832	0.9531
Total	Total[FA22:5]	uM	6.3343	5.2352	2.9129	5.4737	4.9446	18.3249	7.4766	18.9517	13.0346	10.2585	16.0581	19.557	21.8181	6.4607	3.7346	8.8169	3.027	5.3264	5.7456	12.241	8.5288
Total	Total[FA22:6]	uM	113.174	91.7045	59.356	80.5678	81.1899	170.857	129.972	173.364	156.798	136.034	163.681	193.461	211.663	102.475	72.0296	113.404	59.4132	109.53	91.9257	130.348	107.314
Total	Total[FA24:0]	uM	3.8939	3.0858	2.2232	3.0141	2.9251	3.6317	3.4816	3.1832	3.5839	3.4792	3.2329	4.2157	3.6029	2.9471	2.652	2.4734	2.8019	3.5463	3.2754	3.2138	3.1975
Total	Total[FA24:1]	uM	3.9183	3.9816	2.7681	4.2671	4.1313	4.7119	3.5929	3.9978	3.8128	4.6958	4.2898	5.4797	4.7075	3.137	3.1767	3.6786	3.1934	3.8163	3.8755	3.4619	4.1877
Total	Total[FA26:0]	uM	0.0255	0.0279	0.0197	0.0217	0.0237	0.0389	0.0235	0.0249	0.0312	0.0298	0.0298	0.0309	0.0231	0.0257	0.0263	0.0236	0.0193	0.0239	0.0272	0.0352	0.0246
Total	Total[FA26:1]	uM	0.0291	0.0262	0.0214	0.0283	0.0253	0.0362	0.0212	0.0309	0.0331	0.0277	0.0325	0.0354	0.0265	0.026	0.0229	0.0256	0.022	0.0219	0.0295	0.0251	0.0345

## Sheet: Fatty Acid Compositions
TrueMass® Complex Lipid Panel: Fatty Acid Compositions
Project Code:	WAKE-0204-18VWCLP
		Sample Name	WAKE-01208-01	WAKE-01209-01	WAKE-01210-01	WAKE-01211-01	WAKE-01212-01	WAKE-01213-01	WAKE-01214-01	WAKE-01215-01	WAKE-01216-01	WAKE-01217-01	WAKE-01218-01	WAKE-01219-01	WAKE-01220-01	WAKE-01221-01	WAKE-01222-01	WAKE-01223-01	WAKE-01224-01	WAKE-01225-01	WAKE-01226-01	WAKE-01227-01	WAKE-01228-01
		CLIENT IDENTIFIER	Sham4	Sham5	Sham6	Sham7	Sham8	CLP1	CLP2	CLP3	CLP4	CLP5	CLP6	CLP7	CLP8	DCA1	DCA2	DCA3	DCA4	DCA5	DCA6	DCA7	DCA8
		AGE	8wk	8wk	8wk	8wk	8wk	8wk	8wk	8wk	8wk	8wk	8wk	8wk	8wk	8wk	8wk	8wk	8wk	8wk	8wk	8wk	8wk
		AMOUNT EXTRACTED CLP	75	75	75	75	75	75	75	75	75	75	75	75	75	75	75	75	75	75	75	75	75
		BRADFORD CLP	13.238	9.19	11.778	9.73	9.801	8.604	12.735	9.121	8.822	9.049	8.744	8.788	9.677	9.331	10.476	11.423	11.957	10.915	8.045	8.718	7.411
		CELL LINE	Primary cells	Primary cells	Primary cells	Primary cells	Primary cells	Primary cells	Primary cells	Primary cells	Primary cells	Primary cells	Primary cells	Primary cells	Primary cells	Primary cells	Primary cells	Primary cells	Primary cells	Primary cells	Primary cells	Primary cells	Primary cells
		GENDER	M	M	M	M	M	M	M	M	M	M	M	M	M	M	M	M	M	M	M	M	M
		ORIG ORDER	4	5	6	7	8	9	10	11	12	13	14	15	16	17	18	19	20	21	22	23	24
		SPL AMNT	150-200 ul cell pellet	150-200 ul cell pellet	150-200 ul cell pellet	150-200 ul cell pellet	150-200 ul cell pellet	150-200 ul cell pellet	150-200 ul cell pellet	150-200 ul cell pellet	150-200 ul cell pellet	150-200 ul cell pellet	150-200 ul cell pellet	150-200 ul cell pellet	150-200 ul cell pellet	150-200 ul cell pellet	150-200 ul cell pellet	150-200 ul cell pellet	150-200 ul cell pellet	150-200 ul cell pellet	150-200 ul cell pellet	150-200 ul cell pellet	150-200 ul cell pellet
		SPL TYPE	cells	cells	cells	cells	cells	cells	cells	cells	cells	cells	cells	cells	cells	cells	cells	cells	cells	cells	cells	cells	cells
		SUBJ ID	C57/BL6 mouse	C57/BL6 mouse	C57/BL6 mouse	C57/BL6 mouse	C57/BL6 mouse	C57/BL6 mouse	C57/BL6 mouse	C57/BL6 mouse	C57/BL6 mouse	C57/BL6 mouse	C57/BL6 mouse	C57/BL6 mouse	C57/BL6 mouse	C57/BL6 mouse	C57/BL6 mouse	C57/BL6 mouse	C57/BL6 mouse	C57/BL6 mouse	C57/BL6 mouse	C57/BL6 mouse	C57/BL6 mouse
		TIME POINT	30 hr	30 hr	30 hr	30 hr	30 hr	30 hr	30 hr	30 hr	30 hr	30 hr	30 hr	30 hr	30 hr	30 hr	30 hr	30 hr	30 hr	30 hr	30 hr	30 hr	30 hr
		TREATMENT	None	None	None	None	None	CLP/PBS	CLP/PBS	CLP/PBS	CLP/PBS	CLP/PBS	CLP/PBS	CLP/PBS	CLP/PBS	CLP/DCA	CLP/DCA	CLP/DCA	CLP/DCA	CLP/DCA	CLP/DCA	CLP/DCA	CLP/DCA
		TX	Sham	Sham	Sham	Sham	Sham	CLP/PBS	CLP/PBS	CLP/PBS	CLP/PBS	CLP/PBS	CLP/PBS	CLP/PBS	CLP/PBS	CLP/DCA	CLP/DCA	CLP/DCA	CLP/DCA	CLP/DCA	CLP/DCA	CLP/DCA	CLP/DCA
		GROUP NAME	11.8.18 30hr sham mouse hepatocytes	11.8.18 30hr sham mouse hepatocytes	9.13.18 30hr sham mouse hepatocytes	10.9.18 30hr sham mouse hepayocytes	10.9.18 30hr sham mouse hepayocytes	11.8.18 30hr CLP mouse hepatocytes	9.20.18 30hr CLP mouse hepatocytes	10.11.18 30hr CLP mouse hepatocytes	9.25.18 30hr CLP mouse hepatocytes	10.11.18 30hr CLP mouse hepatocytes	9.27.18 30hr CLP mouse hepatocytes	10.4.18 30hr CLP mouse hepatocytes	10.9.18 30hr CLP mouse hepatocytes	9.18.18 30hr CLP+DCA mouse hepatocytes	9.18.18 30hr CLP+DCA mouse hepatocytes	9.20.18 30hr CLP+DCA mouse hepatocytes	9.25.18 30hr CLP+DCA mouse hepatocytes	9.27.18 30hr CLP+DCA mouse hepatocytes	9.27.18 30hr CLP+DCA mouse hepatocytes	10.4.18 30hr CLP+DCA mouse hepatocytes	10.4.18 30hr CLP+DCA mouse hepatocytes
Class	Name	Group Units	1	1	1	1	1	2	2	2	2	2	2	2	2	3	3	3	3	3	3	3	3
CER	CER[FA14:0]	Mol%	0.1248	0.2109	0.1597	0.2093	0.2297	0.1976	0.1242	0.2901	0.2501	0.3189	0.3144	0.1719	0.2573	0.1482	0.1433	0.2694	0.1826	0.1771	0.2475	0.2127	0.246
CER	CER[FA16:0]	Mol%	4.407	5.3134	5.0146	5.2817	5.3853	7.5631	6.8884	9.2526	7.5677	7.0737	8.944	7.2414	12.5158	6.4058	4.7142	9.6034	6.6859	6.588	6.7904	7.3189	6.7792
CER	CER[FA18:0]	Mol%	0.3549	0.8581	0.5484	0.7936	0.7566	1.849	1.0769	2.5948	1.5837	0.6632	2.7824	1.1893	1.8218	0.9122	0.5451	1.3476	0.5976	0.7018	0.8709	0.6821	0.8567
CER	CER[FA18:1]	Mol%	0.0354	0.0501	0.0343	0.0408	0.0447	0.0432	0.0473	0.0755	0.1135	0.1168	0.1062	0.0493	0.0556	0.0333	0.0215	0.06	0.0368	0.0629		0.0639	0.0593
CER	CER[FA20:0]	Mol%	1.0214	2.4087	1.8935	2.0622	2.0259	3.0791	2.2049	3.8451	3.6236	2.3609	5.0008	2.8086	2.7234	2.2839	1.7041	2.749	1.5	1.8308	2.2509	1.8147	2.1992
CER	CER[FA20:1]	Mol%	0.0301	0.0732	0.0561	0.0504	0.064	0.0877	0.0662	0.14	0.1618	0.1452	0.1938	0.0801	0.1215	0.0503	0.0406	0.1059	0.0507	0.0549	0.0778	0.0889	0.0902
CER	CER[FA22:0]	Mol%	24.3237	27.9579	27.7634	25.2077	25.4002	26.8462	27.2351	25.8442	31.7303	25.7901	28.0617	27.9591	24.6096	29.4895	26.9352	24.5642	22.7536	25.5504	25.3904	25.4112	25.4667
CER	CER[FA22:1]	Mol%	1.6861	2.4193	2.0727	2.5267	2.4134	2.2944	2.155	3.6016	2.6851	3.9732	3.5875	2.4957	2.4833	2.1731	2.1661	2.5468	2.1712	1.8257	2.0352	2.2991	2.2857
CER	CER[FA24:0]	Mol%	36.8935	28.2584	29.7776	26.8922	26.9282	27.5788	29.9743	24.6923	29.6432	28.2558	24.3031	28.8561	24.7207	30.7048	29.6229	24.2695	31.3088	32.3646	32.3116	30.5139	30.0529
CER	CER[FA24:1]	Mol%	30.9655	32.2842	32.5474	36.7567	36.5916	30.3052	30.0809	29.4611	22.4518	31.0972	26.5422	28.9855	30.5134	27.6929	33.9742	34.2876	34.5747	30.6928	29.8238	31.4367	31.7898
CER	CER[FA26:0]	Mol%	0.0836	0.0722	0.0662	0.0868	0.0745	0.0801	0.0675	0.0645	0.0862	0.1078	0.0783	0.0726	0.0919	0.0442	0.0634	0.0877	0.0569	0.0795	0.1096	0.0799	0.0779
CER	CER[FA26:1]	Mol%	0.0739	0.0934	0.0662	0.092	0.0859	0.0756	0.0795	0.1383	0.103	0.0973	0.0856	0.0904	0.0858	0.0619	0.0695	0.109	0.0812	0.0716	0.0919	0.0779	0.0964
CE	CE[FA12:0]	Mol%		0.0157		0.014					0.0819					0.0118	0.0244				0.0098	0.0096
CE	CE[FA14:0]	Mol%	0.264	0.1875	0.1457	0.1948	0.1873	0.2155	0.2665	0.2721	0.5391	0.4482	0.4026	0.2047	0.2525	0.1883	0.2123	0.2023	0.2144	0.1683	0.1569	0.1866	0.1659
CE	CE[FA14:1]	Mol%	0.0436	0.0208	0.0289	0.0271	0.0246	0.0373	0.0605	0.0503	0.1459	0.0985	0.0804	0.0334	0.0397	0.0421	0.0349	0.0338	0.0273	0.025	0.0217	0.0289	0.0239
CE	CE[FA15:0]	Mol%	0.1923	0.1193	0.1025	0.1172	0.1116	0.0918	0.2053	0.1053	0.3879	0.2548	0.3001	0.0931	0.1092	0.107	0.1344	0.0926	0.1396	0.1056	0.0929	0.0762	0.0871
CE	CE[FA16:0]	Mol%	8.5624	9.0356	8.1414	8.9173	8.9226	10.3743	8.577	11.5556	8.8056	8.8332	10.2997	11.5137	11.0772	8.9719	8.7284	10.6546	8.6126	9.0115	9.3816	9.3198	9.7394
CE	CE[FA16:1]	Mol%	7.1197	7.2553	4.9015	6.9609	6.91	7.189	3.6675	9.0284	3.8697	9.5101	6.0884	8.9673	8.663	5.2152	5.5396	7.171	5.856	5.322	5.1535	9.0607	6.21
CE	CE[FA17:0]	Mol%	0.6142	0.5686	0.6281	0.5476	0.5415	0.4933	0.5016	0.4587	0.5167	0.516	0.571	0.4969	0.4475	0.4549	0.6314	0.5483	0.6068	0.443	0.4934	0.4284	0.4589
CE	CE[FA18:0]	Mol%	2.8216	2.7854	2.8711	2.4775	2.5747	2.6194	2.4495	2.1894	1.933	1.951	2.1685	2.5136	2.2316	2.6688	2.9417	2.3993	2.9362	2.5616	2.6584	2.1331	2.319
CE	CE[FA18:1]	Mol%	38.0864	42.0836	40.6814	40.017	39.4937	39.8434	28.2362	34.2501	17.5955	33.5846	27.5032	38.1761	38.0845	41.4929	42.1935	37.5925	42.8484	41.6288	40.5117	40.0502	39.4008
CE	CE[FA18:2]	Mol%	30.2637	30.1137	34.3021	31.685	32.3871	29.7493	37.7456	31.125	36.4234	29.525	33.1606	29.3499	30.7355	32.7474	31.6504	32.7155	30.7741	32.2774	34.4286	30.3265	34.1209
CE	CE[FA18:3]	Mol%	2.1081	1.9401	1.8837	1.933	1.9451	1.8327	1.2223	2.3509	1.8719	1.6645	1.8934	2.1609	2.4282	1.4216	1.7413	2.1229	1.4911	1.7943	1.9177	2.0048	2.083
CE	CE[FA18:4]	Mol%	0.0924	0.0532	0.0739	0.0518	0.0501	0.0175	0.0381	0.0391	0.0782	0.0364	0.0683	0.0267	0.0274	0.0271	0.0575	0.0391	0.0542	0.0409	0.0327	0.03	0.0316
CE	CE[FA20:0]	Mol%	0.2558	0.1627	0.2952	0.1614	0.1657	0.124	0.24	0.1167	0.4899	0.2755	0.2793	0.1309	0.0964	0.2288	0.2434	0.1649	0.2571	0.1988	0.2544	0.1195	0.1795
CE	CE[FA20:1]	Mol%	0.4217	0.2678	0.4058	0.316	0.3296	0.2001	0.5363	0.2841	1.2129	0.6238	0.6693	0.1871	0.2004	0.2455	0.4082	0.243	0.3847	0.3056	0.2479	0.2316	0.2349
CE	CE[FA20:2]	Mol%	0.1784	0.137	0.2082	0.1604	0.1601	0.1468	0.2625	0.1252	0.7751	0.3296	0.5297	0.1051	0.0823	0.1109	0.1635	0.1013	0.197	0.1917	0.1338	0.0978	0.1248
CE	CE[FA20:3]	Mol%	0.4276	0.2338	0.264	0.2952	0.2868	0.3076	0.5385	0.2583	1.3105	0.7401	1.007	0.2621	0.1892	0.2064	0.2612	0.1814	0.2447	0.2307	0.1728	0.2053	0.1837
CE	CE[FA20:4]	Mol%	3.2024	1.6994	1.5921	2.1583	2.1246	2.1579	4.7137	2.0072	7.4929	3.9768	4.7812	1.7688	1.571	1.4628	1.5393	1.4386	1.7073	1.545	1.1915	1.4326	1.2898
CE	CE[FA20:5]	Mol%	0.8091	0.3126	0.4113	0.359	0.3655	0.2866	0.8775	0.4357	1.1444	0.4746	0.8017	0.2691	0.3184	0.2929	0.3784	0.3403	0.3593	0.2889	0.2725	0.2625	0.2667
CE	CE[FA22:0]	Mol%	0.0789	0.0392	0.0665	0.0333	0.0421	0.0287	0.0821	0.0488	0.1653	0.1119	0.1286	0.0262	0.032	0.049	0.0456	0.0383	0.0658	0.0467	0.0382	0.0404	0.0253
CE	CE[FA22:1]	Mol%	0.172	0.0948	0.1426	0.0926	0.1074	0.0546	0.1807	0.0847	0.4922	0.2358	0.28	0.066	0.0632	0.0857	0.1237	0.0589	0.1239	0.1171	0.0739	0.0603	0.065
CE	CE[FA22:2]	Mol%	0.1442	0.092	0.149	0.1209	0.1019	0.0458	0.2434	0.0811	0.6456	0.2632	0.2705	0.0561	0.0444	0.0557	0.1083	0.0683	0.1117	0.1046	0.0801	0.0497	0.068
CE	CE[FA22:4]	Mol%	0.0269	0.0183	0.0203	0.0264	0.0229	0.098	0.1248	0.0787	0.653	0.2167	0.3237	0.0465	0.0193	0.0222	0.0242	0.0166	0.0179	0.0207	0.0184	0.0205	0.0161
CE	CE[FA22:5]	Mol%	0.2391	0.1458	0.159	0.1945	0.1776	0.2786	0.5501	0.3374	1.3246	0.4318	0.6101	0.2288	0.2187	0.2142	0.1888	0.2253	0.16	0.1932	0.1634	0.2108	0.168
CE	CE[FA22:6]	Mol%	3.7687	2.558	2.4364	3.0691	2.8935	3.6994	8.4863	4.5935	11.6671	5.6806	7.424	3.2383	2.9983	3.6049	2.5254	3.5002	2.722	3.3205	2.4376	3.5598	2.6902
CE	CE[FA24:0]	Mol%	0.0481	0.0274	0.0496	0.0333	0.0333	0.0292	0.0882	0.0472	0.1608	0.0875	0.1324	0.0416	0.0335	0.0349	0.0412	0.0257	0.0356	0.0291	0.0279	0.0304	0.0227
CE	CE[FA24:1]	Mol%	0.0584	0.0324	0.0398	0.0368	0.0407	0.0791	0.1057	0.076	0.2167	0.1299	0.2261	0.0368	0.0366	0.037	0.059	0.0252	0.0523	0.029	0.0288	0.0241	0.025
DAG	DAG[FA12:0]	Mol%	0.0678	0.1013	0.0864	0.0882	0.0886	0.0681	0.0675	0.1121	0.1585	0.0852	0.1345	0.0851	0.09	0.1396	0.0839	0.0995	0.1328	0.064	0.099	0.08	0.0768
DAG	DAG[FA14:0]	Mol%	0.5971	0.3954	0.4128	0.4547	0.3852	0.6276	0.4645	0.7137	0.8733	0.8192	0.8707	0.6218	0.6322	0.5309	0.5482	0.5553	0.5004	0.4891	0.4696	0.5267	0.4682
DAG	DAG[FA14:1]	Mol%	0.0464	0.0405	0.0509	0.0329	0.0349	0.0278	0.0466	0.0407	0.0366	0.0318	0.0277	0.028	0.0288	0.0494	0.0585	0.0307	0.0532	0.0451	0.0951	0.0249	0.0354
DAG	DAG[FA15:0]	Mol%	0.2582	0.2072	0.249	0.2152	0.1889	0.186	0.2137	0.2065	0.2191	0.229	0.2274	0.1963	0.2071	0.2249	0.2919	0.1981	0.2481	0.1748	0.2107	0.2036	0.2429
DAG	DAG[FA16:0]	Mol%	28.0046	25.3825	26.6443	26.0434	25.8354	20.9538	24.2944	21.8049	16.3355	17.5154	18.9404	20.353	23.1837	23.5792	27.074	24.1758	25.5288	25.9363	22.8206	23.3262	23.8626
DAG	DAG[FA16:1]	Mol%	2.2257	2.0966	1.5851	1.9495	1.9001	2.2614	1.327	2.5432	3.358	4.5199	3.5378	2.7024	2.6379	1.776	1.9459	1.9896	1.7979	1.5913	1.688	2.645	1.8554
DAG	DAG[FA18:0]	Mol%	6.1579	6.02	6.6864	5.5179	5.4974	3.731	5.33	4.1438	3.1996	2.3865	3.0972	3.3602	3.5216	4.6963	6.1517	4.1412	6.6374	5.3221	4.7431	2.7319	3.8196
DAG	DAG[FA18:1]	Mol%	20.4158	22.1963	18.8602	20.924	20.8712	27.0832	21.1118	24.4523	27.2019	28.653	26.7647	26.9981	23.1104	23.0631	20.0003	21.8288	20.8066	21.2429	23.1079	25.1466	23.3027
DAG	DAG[FA18:2]	Mol%	27.0644	30.3388	31.4652	31.0125	31.2015	34.003	31.9093	34.3161	35.0573	33.3036	35.9146	34.3848	34.2759	32.0344	30.6591	33.0999	29.8423	31.6094	33.1427	33.3846	33.0865
DAG	DAG[FA18:3]	Mol%	0.901	0.8764	0.9878	0.97	0.9146	1.0991	0.5897	1.1457	1.419	0.8793	1.2436	1.0569	1.2838	0.8726	0.8471	1.0773	0.7874	0.9385	0.8493	1.206	0.9991
DAG	DAG[FA20:0]	Mol%	0.0975	0.0335	0.0371	0.0596	0.039	0.0501		0.0602	0.0537	0.0585	0.0405	0.0345	0.0505		0.0524	0.0502	0.1126	0.0661	0.0761	0.0617	0.0553
DAG	DAG[FA20:1]	Mol%	0.1625	0.1481	0.1415	0.1213	0.1224	0.1499	0.1641	0.1528	0.1988	0.3704	0.1577	0.1793	0.1113	0.1706	0.1594	0.1222	0.159	0.1341	0.1655	0.1659	0.1473
DAG	DAG[FA20:2]	Mol%	0.2459	0.2079	0.2324	0.2017	0.1744	0.2041	0.2103	0.2136	0.3328	0.5242	0.2548	0.2524	0.1623	0.2558	0.2351	0.1946	0.2779	0.2488	0.2649	0.2306	0.2199
DAG	DAG[FA20:3]	Mol%	1.3064	0.9519	0.9856	0.9686	1.0051	0.5625	0.6305	0.5277	0.8734	1.0677	0.6202	0.6002	0.5073	0.6787	1.0057	0.5686	1.0759	1.0195	0.7832	0.6251	0.7002
DAG	DAG[FA20:4]	Mol%	3.053	2.3498	2.4881	2.5997	2.5785	1.3405	2.1899	1.2531	1.2829	1.708	1.0442	1.1461	1.4687	1.8277	2.4878	1.8772	2.8156	2.1071	1.844	1.272	1.63
DAG	DAG[FA20:5]	Mol%	0.6834	0.5277	0.6077	0.5479	0.5838	0.5235	0.6344	0.6877	0.4995	0.3564	0.441	0.5725	0.7401	0.4542	0.5277	0.6753	0.4764	0.4854	0.5435	0.5657	0.5178
DAG	DAG[FA22:4]	Mol%	0.0595	0.0599	0.0554	0.0694	0.0698	0.099	0.0822	0.0881	0.1085	0.1722	0.0804	0.097	0.0924	0.092	0.0565	0.0795	0.0797	0.0624	0.0905	0.0821	0.0877
DAG	DAG[FA22:5]	Mol%	1.2134	1.0642	0.9601	1.1374	1.1697	1.178	1.5117	1.5117	1.5049	1.3144	1.1632	1.3166	1.3362	1.2895	0.9777	1.4855	1.0647	1.2705	1.4494	1.4407	1.5273
DAG	DAG[FA22:6]	Mol%	7.4394	7.0022	7.464	7.0861	7.3392	5.8515	9.2223	6.0258	7.2866	6.0053	5.4395	6.0149	6.5597	8.2651	6.8374	7.7505	7.6033	7.1928	7.5568	6.2807	7.3652
DCER	DCER[FA14:0]	Mol%		1.0819			0.9641			1.0012		2.1408	1.2235		1.5496	0.9352	0.9932		0.8297		0.9387	1.4328	1.4497
DCER	DCER[FA16:0]	Mol%	5.5773	5.6429	5.1025	5.4705	5.8186	9.7563	8.4564	13.602	9.1525	7.2115	10.1647	8.9461	14.3165	6.4055	5.6926	11.0155	7.8804	6.5893	6.0666	8.5395	6.7047
DCER	DCER[FA18:0]	Mol%	0.9378	1.5602	1.1339	1.5831	1.4348	3.2005	2.2104	5.3213	3.3149		3.7763	2.2983	3.4205	1.6971	0.8115	1.9115	1.2338	1.5356	1.7583	1.2142	1.7047
DCER	DCER[FA20:0]	Mol%	2.1092	3.798	3.5481	3.8522	3.9358	4.7307	3.3398	6.0694	5.8977	4.555	8.5602	5.0727	5.1287	4.0593	2.5879	4.1218	2.5283	4.4119	3.944	3.2225	3.8322
DCER	DCER[FA20:1]	Mol%
DCER	DCER[FA22:0]	Mol%	23.8722	23.6249	24.0008	20.8502	21.783	26.791	25.6517	24.8386	24.3179	19.3062	25.3842	28.6962	22.4387	26.1378	23.5859	21.7734	20.9262	22.8107	20.4904	21.4294	20.8121
DCER	DCER[FA22:1]	Mol%	4.1855	5.0108	4.7576	5.1656	5.7279	4.4836	3.8532	3.9754	6.5747	7.2271	5.5671	4.2386	5.7307	4.6358	4.1705	4.1321	4.0271	4.835	5.5832	4.9891	5.9262
DCER	DCER[FA24:0]	Mol%	28.0544	19.0411	21.6857	19.4782	19.4692	18.7899	21.7957	15.8097	18.2197	16.3138	13.4965	20.2048	17.3628	20.861	21.8943	16.1214	22.7508	21.9407	19.2154	21.0899	17.2617
DCER	DCER[FA24:1]	Mol%	31.766	34.5519	35.6373	39.5603	37.0952	27.3994	31.5641	26.4522	27.7833	37.3779	28.1233	27.1497	30.0525	30.9469	34.527	36.8592	35.8443	33.7691	35.8739	29.3935	37.4362
DCER	DCER[FA26:0]	Mol%	2.1289	3.3197	2.3481	2.1753	1.5993	3.4254	1.8111	1.4119	2.994	3.2737	2.4808	1.6682		2.3098	4.2755	2.3906	2.1721	2.3866	3.8739	6.8477	2.4362
DCER	DCER[FA26:1]	Mol%	1.3688	2.3688	1.7859	1.8646	2.1721	1.4233	1.3177	1.5183	1.7452	2.594	1.2235	1.7255		2.0115	1.4615	1.6745	1.8072	1.721	2.2557	1.8414	2.4362
FFA	FFA[FA12:0]	Mol%	0.7887	1.203	0.9122	0.9685	0.9144	0.9078	0.9032	0.8225	1.1874	0.7233	0.841	0.7104	0.7126	0.9993	0.8648	0.7891	0.9541	0.9659	0.8636	0.8378	1.026
FFA	FFA[FA14:0]	Mol%	2.1117	2.7486	2.2637	2.3754	2.2833	2.3722	2.1851	2.2731	3.0905	2.2987	2.4285	2.0789	2.0564	2.9851	2.2132	2.0717	2.397	2.4332	2.1635	2.1247	2.5055
FFA	FFA[FA14:1]	Mol%	0.468	0.6699	0.5513	0.5365	0.5357	0.5099	0.5231	0.5581	0.6898	0.4818	0.5471	0.448	0.4616	0.5921	0.5339	0.4928	0.5175	0.5884	0.5587	0.5101	0.5842
FFA	FFA[FA15:0]	Mol%	1.3089	1.8132	1.4198	1.3991	1.4246	1.4447	1.4944	1.2354	1.7145	1.3218	1.3607	1.2187	1.2276	1.7783	1.298	1.1711	1.3544	1.534	1.297	1.2479	1.5707
FFA	FFA[FA16:0]	Mol%	33.601	37.5544	33.4453	34.5682	33.8476	36.2083	33.6283	34.9269	35.6375	31.6105	32.7328	33.3791	34.3329	37.327	34.7355	33.6467	35.1106	35.6674	33.4185	33.7416	34.8773
FFA	FFA[FA16:1]	Mol%	2.1756	2.0966	1.6124	1.7612	1.8291	2.2601	1.5826	2.2214	3.35	4.5328	3.49	2.9834	2.2566	1.9779	1.6052	1.7552	1.4865	1.527	1.4491	2.1243	1.6089
FFA	FFA[FA17:0]	Mol%	1.001	1.1099	1.0865	1.0782	1.079	0.9821	1.0511	0.9384	0.9821	0.9495	0.925	0.923	0.9324	1.2005	1.1041	0.9622	1.1502	1.0765	1.1223	1.0383	1.1033
FFA	FFA[FA18:0]	Mol%	17.5675	15.0346	17.6773	17.4118	16.4065	14.8752	15.6921	16.5818	11.9216	13.6129	12.4577	13.2745	15.9264	22.3663	19.3362	16.5999	20.6303	18.1828	18.0628	16.3289	17.1103
FFA	FFA[FA18:1]	Mol%	8.4642	9.139	8.2606	8.4883	9.0644	10.4954	8.8371	9.8442	11.1911	12.6437	12.4913	12.4914	9.7272	6.9832	7.4808	8.6898	7.3588	7.8874	8.8168	10.4025	8.5923
FFA	FFA[FA18:2]	Mol%	10.2368	12.3916	12.8738	12.1219	13.0258	15.0596	12.9047	14.7025	16.371	14.4106	17.3903	16.4402	15.0207	9.3986	11.5304	14.4309	9.8429	11.5015	12.9298	14.5576	13.2099
FFA	FFA[FA18:4]	Mol%	0.2414	0.2759	0.2837	0.2747	0.2979	0.2705	0.232	0.277	0.2633	0.2284	0.2776	0.2562	0.2549	0.2356	0.3022	0.2908	0.2757	0.2699	0.3149	0.3191	0.3139
FFA	FFA[FA20:0]	Mol%	0.5749	0.4983	0.569	0.5323	0.5577	0.4909	0.5504	0.5394	0.3873	0.5141	0.4344	0.4528	0.4933	0.6168	0.653	0.4956	0.6477	0.5421	0.629	0.6082	0.565
FFA	FFA[FA20:1]	Mol%	0.3885	0.3104	0.3522	0.3339	0.3455	0.3202	0.3748	0.3428	0.3653	0.6156	0.3701	0.3801	0.3219	0.2785	0.3471	0.3106	0.3669	0.3198	0.3751	0.3812	0.3483
FFA	FFA[FA20:2]	Mol%	0.5388	0.3271	0.3966	0.3584	0.3488	0.3242	0.4559	0.3252	0.4157	0.6441	0.4135	0.43	0.3423	0.2875	0.3729	0.2865	0.3917	0.3826	0.3836	0.365	0.338
FFA	FFA[FA20:3]	Mol%	1.5142	0.9096	1.0472	1.0461	1.0636	0.5979	0.7477	0.6135	0.6366	0.9013	0.6795	0.6868	0.6806	0.5596	1.0766	0.7151	0.9889	1.0107	0.891	0.744	0.7546
FFA	FFA[FA20:4]	Mol%	6.7976	5.3427	6.093	6.2881	6.2023	3.8086	5.435	3.4521	2.8116	4.1518	3.2076	3.6657	4.3866	3.3819	5.8362	5.2468	5.9219	5.4536	5.141	3.9593	4.5937
FFA	FFA[FA20:5]	Mol%	2.2233	1.5924	2.0945	1.788	1.807	1.3127	1.849	1.6744	1.1836	1.3444	1.5851	1.4555	1.6395	1.2656	2.0183	2.1796	1.7202	1.6072	1.7779	1.6786	1.7826
FFA	FFA[FA22:0]	Mol%	0.3375	0.2505	0.3239	0.3324	0.329	0.2984	0.3416	0.3382	0.2397	0.3215	0.2823	0.3042	0.3197	0.3556	0.3838	0.3339	0.4044	0.3339	0.418	0.3934	0.396
FFA	FFA[FA22:1]	Mol%	0.9208	0.741	1.0202	1.0054	0.9409	0.9202	0.7914	1.2513	0.7608	0.9487	1.0346	0.9857	1.094	1.3302	1.0994	1.1232	1.2599	0.9197	1.1618	1.1951	1.1929
FFA	FFA[FA22:2]	Mol%	0.1368	0.1166	0.1281	0.1331	0.1267	0.1239	0.1112	0.1503	0.1462	0.2042	0.1681	0.1565	0.1418	0.1434	0.1474	0.1344	0.154	0.1275	0.1656	0.1586	0.1515
FFA	FFA[FA22:4]	Mol%	0.2344	0.2145	0.2314	0.2503	0.2597	0.2866	0.2645	0.281	0.2591	0.3775	0.2621	0.2694	0.2467	0.2126	0.262	0.2613	0.2606	0.248	0.2962	0.2867	0.2994
FFA	FFA[FA22:5]	Mol%	0.8837	0.7475	0.8562	0.8884	0.9509	0.9183	1.1304	1.0785	0.9643	1.167	0.9864	0.9969	1.0189	0.7662	0.8694	1.1052	0.8328	0.8924	1.0265	1.0727	1.0755
FFA	FFA[FA22:6]	Mol%	6.7717	4.3905	5.7691	5.3391	5.6882	4.6708	8.3369	4.7827	5.0093	5.4129	5.0981	5.4875	5.6814	3.9223	5.0564	6.1736	4.9981	5.7776	5.6745	5.1383	5.2104
FFA	FFA[FA24:0]	Mol%	0.1794	0.1287	0.1797	0.1794	0.1768	0.1301	0.1612	0.1773	0.1006	0.1668	0.1212	0.1337	0.16	0.1908	0.2073	0.1651	0.2096	0.1763	0.39	0.1861	0.1901
FFA	FFA[FA24:1]	Mol%	0.5336	0.3934	0.5522	0.5415	0.4946	0.4113	0.4164	0.612	0.3211	0.416	0.4149	0.3914	0.5641	0.8449	0.6661	0.569	0.7653	0.5745	0.6728	0.6	0.5997
HCER	HCER[FA14:0]	Mol%			0.1749	0.1168	0.1245		0.1159		0.1885			0.1972	0.1869	0.1605	0.178		0.177	0.155		0.2189
HCER	HCER[FA16:0]	Mol%	10.4639	10.7688	9.3734	12.0324	11.6012	21.2772	14.8721	16.7267	25.8753	13.8632	23.4678	18.3115	21.4355	20.219	9.5605	17.2677	12.9056	13.3785	15.0167	14.8606	14.3935
HCER	HCER[FA18:0]	Mol%	0.7427	1.262	0.8782	1.2045	1.2169	3.5557	1.5856	3.6707	2.4783	0.9591	3.4552	2.2425	2.7675	1.5433	0.8391	1.9758	1.105	1.6098	1.5269	1.1207	1.4168
HCER	HCER[FA18:1]	Mol%		0.1451	0.2233		0.1687	0.2583	0.1434	0.2466		0.2535	0.2606	0.3577	0.3071	0.2313	0.2543	0.1551	0.3057	0.2151	0.2528	0.2033
HCER	HCER[FA20:0]	Mol%	4.4393	7.096	6.3928	6.6795	6.6504	10.6823	7.0558	11.989	6.6425	5.3872	9.6558	8.7224	10.1519	6.617	5.577	8.1426	5.7448	7.0403	7.3314	5.4939	6.9209
HCER	HCER[FA20:1]	Mol%		0.1218		0.1584	0.1505	0.2849	0.1886	0.4316	0.2862	0.2535	0.2965	0.3073	0.2571	0.2077	0.2331	0.1878		0.2688	0.2275		0.1236
HCER	HCER[FA22:0]	Mol%	45.0228	47.1976	48.3813	45.6219	45.4137	37.7754	43.3548	40.3016	35.4114	41.1037	34.2514	40.5898	36.1342	37.71	45.6838	41.7417	39.4411	42.7794	42.2894	41.5116	44.2576
HCER	HCER[FA22:1]	Mol%	1.9349	2.5791	2.3257	2.8841	2.9113	2.1045	2.2753	3.2059	2.0524	3.3802	2.5207	2.7332	2.437	1.6849	2.0892	2.6861	1.9525	1.9609	2.1893	2.5228	2.4453
HCER	HCER[FA24:0]	Mol%	24.5213	17.0931	18.4193	16.1756	15.9319	14.1088	18.7055	14.033	16.4892	19.4068	15.0431	15.6058	14.7655	19.1193	20.9137	14.3693	24.5561	20.2606	19.0161	20.7193	16.8079
HCER	HCER[FA24:1]	Mol%	12.7385	13.7366	13.727	15.0593	15.579	9.573	11.5908	9.3949	10.5763	15.1181	11.0487	10.3916	11.0132	12.3702	14.5061	13.4739	13.8122	12.3316	11.9476	13.1509	13.3607
HCER	HCER[FA26:0]	Mol%	0.1365			0.0675	0.1194	0.1633	0.112					0.2935	0.2938								0.1236
HCER	HCER[FA26:1]	Mol%			0.1042		0.1323	0.2165				0.2746		0.2476	0.2504	0.1369	0.1653				0.2022	0.1981	0.1501
LCER	LCER[FA14:0]	Mol%	2.5027		1.4247	2.5676	2.3104			1.5324			1.868		2.0841	2.5755	1.817		2.5659		2.084	1.7564	1.6733
LCER	LCER[FA16:0]	Mol%	10.0935	7.2126	7.2749	8.0068	8.0569	9.9923	6.4167	6.8369	9.2231	8.9231	8.2192	9.434	8.1822	7.4519	5.6191	6.4677	8.1967	8.6327	6.6102	6.8386	6.1753
LCER	LCER[FA18:0]	Mol%	6.0231	5.5433	5.3653	6.0135	5.391	6.4181	5.0828	7.4656	5.3223	5.641	5.3134	6.9811	5.5191	5.6319	6.5612	6.0057	6.4148	6.0368	6.3172	5.9043	6.5339
LCER	LCER[FA18:1]	Mol%	27.4477	31.811	33.7375	27.3311	29.3246	21.5988	17.3413	20.3929	19.8016	23.6239	22.2914	19.6981	18.9502	27.4038	28.533	24.4847	35.3528	28.524	26.7014	25.5605	28.0876
LCER	LCER[FA20:0]	Mol%	4.0429	3.2756	3.9103	4.3919	4.2358	5.9954	4.5998	5.5796	3.9339	5.1282	4.5662	6.4151	5.9822	4.3956	5.7201	5.4016	4.8824	5.2822	4.2983	4.8206	3.0279
LCER	LCER[FA20:1]	Mol%	3.4653	3.2756	2.5765	3.1081	3.673	2.8055	3.2429	3.5363	2.843	2.8376	3.3209	3.6981	2.5087	3.0907	2.9946	3.3049	2.9579	3.441	3.4516	3.4006	2.9084
LCER	LCER[FA22:0]	Mol%	24.3124	25.7953	23.2495	25.5743	22.9562	33.9739	36.4305	36.3065	39.4711	31.7265	35.1598	32.4151	38.0934	32.5206	22.8802	34.435	19.0663	26.5017	30.0228	33.4828	32.9881
LCER	LCER[FA22:1]	Mol%	2.9978	3.1181	3.0615	5.0676	3.91	6.8409	4.7148	6.4047	6.0165	5.0598	7.1814	5.1698	6.677	4.4986	4.6433	6.3966	3.3856	4.7389	4.917	6.7638	6.0159
LCER	LCER[FA24:0]	Mol%	11.6062	11.4646	9.4271	7.8378	9.0344	6.764	12.9485	6.8369	7.8017	8.9231	6.2267	8	6.1366	7.3146	10.8681	6.4321	9.8004	8.8138	7.3917	6.2033	6.6932
LCER	LCER[FA24:1]	Mol%	7.5083	8.5039	9.9727	10.1014	9.5379	5.6111	9.2226	5.1081	5.5868	8.1368	5.8531	6.9434	5.8665	5.1168	10.3634	7.0718	7.377	8.029	6.6102	5.2691	5.8964
LCER	LCER[FA26:0]	Mol%					1.5699							1.2453							1.5956
LCER	LCER[FA26:1]	Mol%
LPC	LPC[FA14:0]	Mol%
LPC	LPC[FA15:0]	Mol%
LPC	LPC[FA16:0]	Mol%	45.2544	37.689	40.2017	42.5545	41.8665	50.0918	44.2379	44.7068	35.55	43.0902	42.3665	46.3291	42.5182	46.1427	43.3422	43.6749	43.1274	40.8584	40.2789	44.7891	40.3051
LPC	LPC[FA16:1]	Mol%
LPC	LPC[FA17:0]	Mol%
LPC	LPC[FA18:0]	Mol%	36.0795	42.3198	44.0203	40.6021	38.0966	36.6505	37.6911	37.8379	34.7895	29.3443	33.2798	36.864	37.9197	35.936	41.1252	41.0488	38.4729	42.6121	43.1361	39.0737	43.3432
LPC	LPC[FA18:1]	Mol%	5.225	5.3091	3.7346	4.1385	6.2173	4.7108	4.5889	4.7885	6.7641	6.257	5.4444	4.6551	5.0064	5.0326	4.4709	3.3241	5.0672	3.7489	3.8887	4.657	3.8452
LPC	LPC[FA18:2]	Mol%	4.6346	5.7605	4.4064	4.1385	5.0597	4.5722	4.5889	5.9856	7.7439	7.2253	8.4258	5.1411	5.8468	6.7026	4.9141	4.5866	4.7368	5.3656	4.3647	4.2336	4.8421
LPC	LPC[FA18:3]	Mol%
LPC	LPC[FA20:0]	Mol%	3.4838	3.9604	3.701	4.1385	4.0679	3.9747	3.6402	3.7743	10.5035	6.7421	7.3075	5.0241	3.8032	6.1861	2.9564	3.3899	3.9936	3.2327	4.405	3.9796	3.7024
LPC	LPC[FA20:1]	Mol%
LPC	LPC[FA20:2]	Mol%
LPC	LPC[FA20:3]	Mol%	1.6212																1.0806	1.0795
LPC	LPC[FA20:4]	Mol%	1.5865	2.0805	1.7013	2.2811	1.6493		1.7607			3.424			1.5285		1.3909	2.1302	1.5607	1.3492	1.5179	1.2737	2.1332
LPC	LPC[FA20:5]	Mol%
LPC	LPC[FA22:4]	Mol%
LPC	LPC[FA22:5]	Mol%
LPC	LPC[FA22:6]	Mol%	2.1151	2.8807	2.2348	2.147	3.0426		3.4923	2.9068	4.649	3.9171	3.1761	1.9866	3.3772		1.8004	1.8456	1.9608	1.7537	2.4088	1.9934	1.8288
LPE	LPE[FA16:0]	Mol%	28.8194	26.7059	27.2416	27.6387	29.2542	34.3689	31.0199	33.7059	27.9644	28.2412	34.7309	33.5173	30.7517	34.0471	27.6075	32.9303	30.8674	29.1523	33.1929	33.4768	32.9689
LPE	LPE[FA16:1]	Mol%
LPE	LPE[FA17:0]	Mol%	0.5134	0.5235	0.6466		0.579		0.7449					0.4415			0.5585	0.6145	0.5079	0.6242
LPE	LPE[FA18:0]	Mol%	49.1064	53.1735	55.3469	52.1378	50.7453	50.6908	50.2007	51.1527	45.826	39.6254	43.9425	50.4199	50.565	50.5724	55.6842	51.2677	52.759	53.8834	52.3581	50.3495	52.1005
LPE	LPE[FA18:1]	Mol%	4.0201	4.2835	4.6203	4.3282	4.3115	2.7693	2.8337	3.2378	4.4084	6.1946	4.6823	3.129	3.605	3.2888	4.0855	3.8571	4.1916	3.966	3.8735	3.969	4.232
LPE	LPE[FA18:2]	Mol%	1.5988	1.6031	1.2318	1.7565	1.4043	1.2034	1.6959	1.8337	3.0665	3.4016	2.8958	1.6749	1.4493	1.0104	1.4007	1.1185	1.1331	1.2042	1.2469	1.2912	1.2686
LPE	LPE[FA20:0]	Mol%	1.0055	1.0493	1.3085	0.9677	1.0175	0.9502	0.8651	0.4493	1.3892	1.5003	1.0061	0.8686	0.842	1.3659	1.133	0.6697	0.9117	0.9987	0.8168	0.8984
LPE	LPE[FA20:1]	Mol%	0.8918	1.0352	0.9907	0.8309	0.8155		0.7943	0.5195		1.84		0.7607	0.5008	0.7669	0.8125	0.7338	1.1114	0.6242	0.583	0.7742	0.7391
LPE	LPE[FA20:2]	Mol%	0.485												0.45				0.2583
LPE	LPE[FA20:3]	Mol%	0.7532	1.0072	0.6115	1.0676	0.7022		0.7084	0.4325	1.4537	1.4106					0.5768	0.4686	0.432	0.8162	0.5195	0.6297
[truncated: 144 more rows]
