# Supplementary material for: Dichloroacetate reverses sepsis-induced hepatic metabolic dysfunction
Source: eLife. 2021 Feb 22;10:e64611. doi: 10.7554/eLife.64611 (PMC7901874; doi:10.7554/eLife.64611)
Supplement: Source data 2. [file elife-64611-data2.xlsx]

## Sheet: ProNormImpData
												SAMPLE NAME	WAKE-01208	WAKE-01209	WAKE-01210	WAKE-01211	WAKE-01212	WAKE-01213	WAKE-01214	WAKE-01215	WAKE-01216	WAKE-01217	WAKE-01218	WAKE-01219	WAKE-01220	WAKE-01221	WAKE-01222	WAKE-01223	WAKE-01224	WAKE-01225	WAKE-01226	WAKE-01227	WAKE-01228
												PARENT SAMPLE ID	5862355	5862356	5862357	5862358	5862359	5862360	5862361	5862362	5862363	5862364	5862365	5862366	5862367	5862368	5862369	5862370	5862371	5862372	5862373	5862374	5862375
												CLIENT IDENTIFIER	Sham#4	Sham#5	Sham#6	Sham#7	Sham#8	CLP#1	CLP#2	CLP#3	CLP#4	CLP#5	CLP#6	CLP#7	CLP#8	DCA#1	DCA#2	DCA#3	DCA#4	DCA#5	DCA#6	DCA#7	DCA#8
												AGE	8wk	8wk	8wk	8wk	8wk	8wk	8wk	8wk	8wk	8wk	8wk	8wk	8wk	8wk	8wk	8wk	8wk	8wk	8wk	8wk	8wk
												BRADFORD PROTEIN	27.628	20.373	23.848	23.871	23.101	18.357	27.264	21.466	20.091	22.351	20.866	20.39	22.589	23.546	26.423	28.295	27.642	23.569	19.88	23.27	21.451
												CELL LINE	Primary cells	Primary cells	Primary cells	Primary cells	Primary cells	Primary cells	Primary cells	Primary cells	Primary cells	Primary cells	Primary cells	Primary cells	Primary cells	Primary cells	Primary cells	Primary cells	Primary cells	Primary cells	Primary cells	Primary cells	Primary cells
												GENDER	M	M	M	M	M	M	M	M	M	M	M	M	M	M	M	M	M	M	M	M	M
												ORIG ORDER	4	5	6	7	8	9	10	11	12	13	14	15	16	17	18	19	20	21	22	23	24
												SPL AMNT	150-200 ul cell pellet	150-200 ul cell pellet	150-200 ul cell pellet	150-200 ul cell pellet	150-200 ul cell pellet	150-200 ul cell pellet	150-200 ul cell pellet	150-200 ul cell pellet	150-200 ul cell pellet	150-200 ul cell pellet	150-200 ul cell pellet	150-200 ul cell pellet	150-200 ul cell pellet	150-200 ul cell pellet	150-200 ul cell pellet	150-200 ul cell pellet	150-200 ul cell pellet	150-200 ul cell pellet	150-200 ul cell pellet	150-200 ul cell pellet	150-200 ul cell pellet
												SPL TYPE	cells	cells	cells	cells	cells	cells	cells	cells	cells	cells	cells	cells	cells	cells	cells	cells	cells	cells	cells	cells	cells
												SUBJ ID	C57/BL6 mouse	C57/BL6 mouse	C57/BL6 mouse	C57/BL6 mouse	C57/BL6 mouse	C57/BL6 mouse	C57/BL6 mouse	C57/BL6 mouse	C57/BL6 mouse	C57/BL6 mouse	C57/BL6 mouse	C57/BL6 mouse	C57/BL6 mouse	C57/BL6 mouse	C57/BL6 mouse	C57/BL6 mouse	C57/BL6 mouse	C57/BL6 mouse	C57/BL6 mouse	C57/BL6 mouse	C57/BL6 mouse
												TIME POINT	30 hr	30 hr	30 hr	30 hr	30 hr	30 hr	30 hr	30 hr	30 hr	30 hr	30 hr	30 hr	30 hr	30 hr	30 hr	30 hr	30 hr	30 hr	30 hr	30 hr	30 hr
												TREATMENT	None	None	None	None	None	CLP/PBS	CLP/PBS	CLP/PBS	CLP/PBS	CLP/PBS	CLP/PBS	CLP/PBS	CLP/PBS	CLP/DCA	CLP/DCA	CLP/DCA	CLP/DCA	CLP/DCA	CLP/DCA	CLP/DCA	CLP/DCA
												TX	Sham	Sham	Sham	Sham	Sham	CLP/PBS	CLP/PBS	CLP/PBS	CLP/PBS	CLP/PBS	CLP/PBS	CLP/PBS	CLP/PBS	CLP/DCA	CLP/DCA	CLP/DCA	CLP/DCA	CLP/DCA	CLP/DCA	CLP/DCA	CLP/DCA
												GROUP NAME	11.8.18 30hr sham mouse hepatocytes	11.8.18 30hr sham mouse hepatocytes	9.13.18 30hr sham mouse hepatocytes	10.9.18 30hr sham mouse hepayocytes	10.9.18 30hr sham mouse hepayocytes	11.8.18 30hr CLP mouse hepatocytes	9.20.18 30hr CLP mouse hepatocytes	10.11.18 30hr CLP mouse hepatocytes	9.25.18 30hr CLP mouse hepatocytes	10.11.18 30hr CLP mouse hepatocytes	9.27.18 30hr CLP mouse hepatocytes	10.4.18 30hr CLP mouse hepatocytes	10.9.18 30hr CLP mouse hepatocytes	9.18.18 30hr CLP+DCA mouse hepatocytes	9.18.18 30hr CLP+DCA mouse hepatocytes	9.20.18 30hr CLP+DCA mouse hepatocytes	9.25.18 30hr CLP+DCA mouse hepatocytes	9.27.18 30hr CLP+DCA mouse hepatocytes	9.27.18 30hr CLP+DCA mouse hepatocytes	10.4.18 30hr CLP+DCA mouse hepatocytes	10.4.18 30hr CLP+DCA mouse hepatocytes
												GROUP NUMBER	1	1	1	1	1	2	2	2	2	2	2	2	2	3	3	3	3	3	3	3	3
PATHWAY SORTORDER	BIOCHEMICAL	SUPER PATHWAY	SUB PATHWAY	COMP ID	PLATFORM	CHEMICAL ID	RI	MASS	PUBCHEM	CAS	KEGG	Group HMDB	WAKE-01208	WAKE-01209	WAKE-01210	WAKE-01211	WAKE-01212	WAKE-01213	WAKE-01214	WAKE-01215	WAKE-01216	WAKE-01217	WAKE-01218	WAKE-01219	WAKE-01220	WAKE-01221	WAKE-01222	WAKE-01223	WAKE-01224	WAKE-01225	WAKE-01226	WAKE-01227	WAKE-01228
1458	(14 or 15)-methylpalmitate (a17:0 or i17:0)	Lipid	Fatty Acid, Branched	38768	LC/MS Neg	100002945	5695	269.249	17903417				0.8303	0.8763	1.0346	0.907	1.0614	2.3835	1.1121	0.8959	1.2976	1.2918	1.1638	1.0893	1.8317	1.699	0.7341	0.8125	0.6768	0.876	0.9654	0.887	1.4352
1462	(16 or 17)-methylstearate (a19:0 or i19:0)	Lipid	Fatty Acid, Branched	38296	LC/MS Neg	100002356	5993	297.28	3083779	2724-59-6		HMDB37397	0.9855	0.8093	0.9689	1.1468	1.033	2.6831	1.7735	0.8746	1.3464	1.0145	1.0176	1.0871	2.4923	2.712	0.8875	0.7807	0.7699	0.7834	0.6962	0.7278	1.6578
1690	(R)-3-hydroxybutyrylcarnitine	Lipid	Fatty Acid Metabolism (Acyl Carnitine, Hydroxy)	43264	LC/MS Pos Early	100003926	2400	248.149	53481617			HMDB13127	0.3973	0.6243	0.6562	0.7256	0.7586	1.0741	0.8491	1.165	1.391	1.46	1.5887	0.4791	0.7038	1.2402	0.6339	1.1626	1.5508	1.341	1.8646	2.44	1.315
1691	(S)-3-hydroxybutyrylcarnitine	Lipid	Fatty Acid Metabolism (Acyl Carnitine, Hydroxy)	52984	LC/MS Pos Early	100009271	2340	248.149				HMDB13127	0.5756	0.6195	0.4396	0.7595	0.9189	1.6331	0.9854	1.3303	2.4892	2.7536	2.4732	0.8656	0.8613	1.1461	0.6804	0.5782	1.1225	1.2107	1.5747	1.8888	0.7686
1355	10-heptadecenoate (17:1n7)	Lipid	Long Chain Monounsaturated Fatty Acid	33971	LC/MS Neg	100001278	5555	267.233	5312435	29743-97-3		HMDB60038	0.8611	0.7622	0.9883	0.8317	0.9499	3.4611	1.0024	0.9088	1.7338	1.7221	1.6623	1.3911	2.322	1.9891	0.6711	0.6507	0.6079	0.6322	0.6877	1.0269	1.3815
1363	10-nonadecenoate (19:1n9)	Lipid	Long Chain Monounsaturated Fatty Acid	33972	LC/MS Neg	100001277	5780	295.264	5312513	73033-09-7		HMDB13622	0.773	0.6799	0.8775	0.8232	1.0067	4.652	1.8898	1.0682	1.8699	1.5652	1.3281	1.4126	2.7528	2.9513	0.8365	0.9924	0.5547	0.6706	0.7014	0.9933	1.8695
1789	12,13-DiHOME	Lipid	Fatty Acid, Dihydroxy	38395	LC/MS Neg	62	5137	313.238	10236635	263399-35-5	C14829	HMDB04705	0.7012	1.6874	1.885	1.0357	0.6091	1.1894	0.9088	0.6551	1.3213	0.5848	1.6098	1.5611	1.3508	0.7532	1.2264	0.8233	0.7436	0.9643	0.6098	1.4105	0.6534
1883	12-HETE	Lipid	Eicosanoid	37536	LC/MS Neg	100002167	5326	319.228	5312983	71030-37-0;73837-14-6		HMDB06111	1.0087	1.1605	0.8318	1.8153	1.3516	9.2564	0.9913	0.9018	7.6626	3.0981	3.6482	3.2898	2.4121	2.0139	0.4325	0.5328	0.6189	0.8874	0.9155	0.739	0.6938
1890	12-HHTrE	Lipid	Eicosanoid	57393	LC/MS Neg	1261	5175	279.197	5283141	54397-84-1	C20388	HMDB12535	0.9	1.0307	1.0835	1.375	1.164	1.3144	0.7678	0.5539	1.6432	1.5211	1.1048	1.29	1.6581	1.0295	0.4806	0.63	0.632	0.6969	1.0064	0.469	0.9804
1764	13-HODE + 9-HODE	Lipid	Fatty Acid, Monohydroxy	37752	LC/MS Neg	100002196	5275	295.228	43013				0.3231	0.8674	0.9718	1.0389	0.8008	1.9195	1.0137	0.9863	1.5531	0.8164	0.6863	1.0469	1.331	1.9249	0.753	1.2985	0.5952	0.6523	1.0304	1.1997	1.1456
1801	14,15-DiHETrE	Lipid	Fatty Acid, Dihydroxy	46305	LC/MS Neg	100002752	5188	337.238	5283147	77667-09-5	C14775	HMDB02265	1.5617	1.0446	1.2384	1.4827	1.0464	1.0134	1.0251	1.0248	0.8572	0.8219	0.9361	0.7951	0.8676	0.8437	1.3095	0.8726	0.7898	0.9394	0.5794	0.5804	0.9866
1760	16-hydroxypalmitate	Lipid	Fatty Acid, Monohydroxy	39609	LC/MS Neg	100002953	5236.2	271.228	10466	506-13-8	C18218	HMDB06294	1.1804	1.1487	1.3936	1.3437	0.9808	1.4885	1.2318	0.7141	1.0757	0.7902	0.6939	0.969	1.0348	0.9814	1.0141	1.0428	0.7764	0.9475	0.8916	1.0344	0.9859
2410	1-linoleoyl-GPG (18:2)*	Lipid	Lysophospholipid	54885	LC/MS Neg	100009227	5516	507.273					0.4108	0.4108	1	0.4108	0.4108	0.4108	1.1861	0.4108	1.0028	0.8053	0.4108	1.1899	2.5119	1.6579	0.4108	0.4108	0.4108	0.9946	0.978	0.7371	0.5816
85	1-methyl-4-imidazoleacetate	Amino Acid	Histidine Metabolism	32350	LC/MS Pos Early	100001208	2064	141.066	75810	2625-49-2	C05828	HMDB02820	0.7142	0.74	0.7379	0.7431	0.6432	1.4843	1.6421	1.4112	4.7377	6.9144	2.4848	1.0137	0.833	1.2203	0.9975	1.2411	1.1266	1.0469	0.7714	1.0025	0.8154
86	1-methyl-5-imidazoleacetate	Amino Acid	Histidine Metabolism	62946	LC/MS Pos Early	100002910	1989	141.066	6451814	4200-48-0		HMDB04988	0.6348	0.6348	0.6348	0.7601	0.6348	2.0578	0.6348	0.6348	2.1497	3.4095	1.8813	2.08	0.6348	0.6951	0.9682	0.6348	0.7498	2.9169	0.8694	0.6348	0.6348
84	1-methylhistamine	Amino Acid	Histidine Metabolism	43831	LC/MS Pos Early	100001204	3040	126.103	3614	501-75-7	C05127	HMDB00898	0.3851	0.3851	0.3851	0.3851	0.3851	0.6994	0.3851	0.9932	4.2447	2.6573	1.1609	1.0068	0.8742	0.3851	0.3851	0.3851	0.3851	0.3851	0.3851	0.3851	0.3851
67	1-methylhistidine	Amino Acid	Histidine Metabolism	30460	LC/MS Pos Early	100001051	2755	170.092	92105	332-80-9	C01152	HMDB00001	0.7415	0.3869	1.0116	0.427	0.5224	1.7487	1.3324	2.1796	0.9401	4.4083	0.3869	0.3869	0.5954	1.7811	1.4052	1.6459	0.9884	1.7389	0.8731	1.2203	1.0584
3917	1-methylnicotinamide	Cofactors and Vitamins	Nicotinate and Nicotinamide Metabolism	27665	LC/MS Pos Early	55	1940	137.071	10129985	1005-24-9	C02918	HMDB00699	0.9601	1.1547	0.8995	1.0297	0.9669	0.9504	1.0049	0.9244	0.6838	1.2365	1.056	0.8266	1.0435	1.2247	0.5525	1.037	0.9021	1.3338	1.0957	1.1014	0.9951
2408	1-oleoyl-GPG (18:1)*	Lipid	Lysophospholipid	45968	LC/MS Neg	100005716	5610	509.288					0.6294	1.126	0.7065	0.4964	0.5772	4.1471	1.225	0.558	0.4964	1.0017	1.2513	1.0475	2.1086	3.5022	1.0186	0.9715	0.718	1.0414	0.4964	0.7974	0.767
2203	1-palmitoyl-2-arachidonoyl-glycosyl-GPE (16:0/20:4)	Lipid	Glycosyl PE	63195	LC/MS Pos Late	100021395	2180	902.575					1	2.0576	1.2426	1.2876	1.1452	0.5567	0.5259	0.5259	1.1363	1.357	0.5259	0.5531	0.5259	0.6026	0.6213	0.7143	1.0138	0.9211	1.4042	1.1664	0.9013
2204	1-palmitoyl-2-docosahexaenoyl-glycosyl-GPE (16:0/22:6)	Lipid	Glycosyl PE	63196	LC/MS Pos Late	100021397	2098	926.575					0.9533	2.5133	1.3077	1.2996	1.2768	1.0302	0.161	0.2057	1.2002	1.0768	0.8118	0.9219	0.3328	0.724	0.8122	0.932	1.116	1.1459	1.7282	1.4097	1.3086
2202	1-palmitoyl-2-linoleoyl-glycosyl-GPE (16:0/18:2)	Lipid	Glycosyl PE	63197	LC/MS Pos Late	100021393	2258	878.575					1.015	2.1173	1.3697	1.314	1.1064	0.8977	0.0635	0.1413	1.8413	1.8559	0.9773	0.8778	0.2303	1.0416	0.8024	0.8106	1.0804	1.0175	1.6276	1.4079	0.985
2236	1-palmitoyl-2-linoleoyl-GPG (16:0/18:2)	Lipid	Phosphatidylglycerol (PG)	52628	LC/MS Polar	1543	717	745.503		322647-44-9		HMDB10575	1.2624	1.4322	1.1749	1.2725	1.1278	0.8286	0.6629	0.7691	0.6817	0.6095	0.6551	0.719	0.8157	1.1457	0.9301	0.8313	1.0819	1.3709	1.3142	1.0469	1.0059
2235	1-palmitoyl-2-oleoyl-GPG (16:0/18:1)	Lipid	Phosphatidylglycerol (PG)	52448	LC/MS Pos Late	100000641	3206	766.559	5283509				1.2929	0.7912	1.0076	0.9467	0.747	1.2213	1.5981	0.9475	1.1341	0.7284	1.2607	1.1855	1.1752	1.0465	0.9407	0.6812	0.9534	0.9888	0.8507	0.9924	0.6665
2404	1-palmitoyl-GPG (16:0)*	Lipid	Lysophospholipid	45970	LC/MS Neg	100005717	5570	483.273	3300276				0.7784	2.0132	0.8954	0.6178	0.803	3.5555	2.4318	0.913	0.6946	0.5887	1.9606	1.3728	1.941	2.9269	0.9193	0.9148	1.1471	1.0607	0.9035	0.9393	0.7807
2397	1-palmitoyl-GPS (16:0)*	Lipid	Lysophospholipid	46130	LC/MS Neg	100005805	5572	496.268	9547100				0.1954	2.2201	0.7621	0.2482	0.8047	3.2305	1.2342	0.9976	0.3781	1.0706	1.7328	1.2641	1.7863	4.1379	1.0024	1.7215	0.733	0.9265	0.726	0.8935	1.4308
88	1-ribosyl-imidazoleacetate*	Amino Acid	Histidine Metabolism	61868	LC/MS Pos Early	100001668	2006	259.092	5117448	29605-99-0	C05131	HMDB02331	1.3669	0.8374	1.3711	0.5165	0.5432	0.6791	1.2527	0.3924	2.4091	1.9159	1.0388	0.4269	0.1567	1.3294	1.3399	0.5367	0.9612	1.2695	0.6408	0.4579	0.791
2209	1-stearoyl-2-arachidonoyl-glycosyl-GPE (18:0/20:4)	Lipid	Glycosyl PE	63193	LC/MS Pos Late	100021404	2423	930.607					1.0415	2.4869	1.4648	1.2753	1.1463	0.9585	0.1694	0.1848	1.4503	1.4101	0.6795	0.8044	0.3315	0.8002	0.7407	0.7984	1.114	1.1508	1.8072	1.3305	1.2755
2225	1-stearoyl-2-arachidonoyl-GPS (18:0/20:4)	Lipid	Phosphatidylserine (PS)	52235	LC/MS Pos Late	100001872	2565	812.544				HMDB12383	0.9785	1.0944	1.006	1.3427	1.2614	1.3912	0.6586	1.1947	0.8837	0.9581	1.0205	1.2236	1.2934	0.8981	0.8916	0.8985	0.8402	1.1608	1.1476	0.994	1.1845
2210	1-stearoyl-2-docosahexaenoyl-glycosyl-GPE (18:0/22:6)	Lipid	Glycosyl PE	63194	LC/MS Pos Late	100021405	2316	954.607					0.9881	2.3724	1.4474	1.4582	1.3429	1.1344	0.0951	0.2269	1.472	0.9049	0.7844	0.8068	0.351	0.9595	0.7659	1.0119	1.0192	1.1362	1.7389	1.3329	1.297
2208	1-stearoyl-2-linoleoyl-glycosyl-GPE (18:0/18:2)	Lipid	Glycosyl PE	63192	LC/MS Pos Late	100021403	2516	906.607					0.8618	2.4132	1.5683	1.6068	0.9265	0.1948	0.1948	0.1948	1.7852	1.2607	0.4164	0.1948	0.1948	0.9539	0.9076	0.9013	1.0125	1.6072	1.7979	1.4736	1.279
2222	1-stearoyl-2-oleoyl-GPS (18:0/18:1)	Lipid	Phosphatidylserine (PS)	19265	LC/MS Pos Late	100000639	3000	790.559	9547087			HMDB10163	1.1781	0.663	0.9709	1.4814	1.3643	2.1954	0.6724	1.0291	1.7943	1.9447	1.69	1.9492	2.6237	0.7099	0.3966	0.5234	0.6303	0.9078	1.1414	0.7885	1.0976
2406	1-stearoyl-GPG (18:0)	Lipid	Lysophospholipid	34437	LC/MS Neg	100001462	5816	511.304					0.7732	1.4984	1.1421	0.9963	0.8116	1.8829	0.9919	0.7558	0.6235	0.6235	0.6401	0.6235	1.9085	2.4617	0.6235	0.7408	1.124	1.1665	1	0.7782	1.4264
2398	1-stearoyl-GPS (18:0)*	Lipid	Lysophospholipid	45966	LC/MS Pos Late	100004327	1634	526.314	9547101				0.6745	1.0829	1.1981	1.2097	0.984	1.0852	1.073	1.1145	0.7589	0.4443	0.7866	1.0552	0.9746	1.4374	1.016	1.0749	0.9463	1.1315	1.1451	0.7935	0.8872
4258	2,3-dihydroxyisovalerate	Xenobiotics	Food Component/Plant	38276	LC/MS Polar	100002417	1050	133.051	677	1756-18-9	C04039	HMDB12141	0.7011	0.7433	0.7011	1.1255	1.4501	0.7011	0.7011	0.8149	1.2851	0.8745	0.7551	0.7011	0.7346	0.7011	0.7011	0.7011	0.7011	1.1711	0.7011	0.7011	0.8495
114	2-aminoadipate	Amino Acid	Lysine Metabolism	6146	LC/MS Polar	381	3500	160.061	469	542-32-5;1118-90-7	C00956	HMDB00510	0.9274	0.4497	0.5036	0.2232	0.2232	3.3307	1.8461	2.5557	2.3006	0.8021	5.9708	1.6901	0.7556	15.9136	10.2703	0.7833	3.6473	0.8594	4.343	0.6608	0.5744
3867	2'-deoxycytidine	Nucleotide	Pyrimidine Metabolism, Cytidine containing	15949	LC/MS Pos Early	100000125	2193	228.098	13711	951-77-9	C00881	HMDB00014	0.856	1.1276	0.704	0.6321	0.6388	2.8293	1.4332	1.2664	7.0438	5.1745	3.6398	0.9866	1.3382	1.0282	0.7768	0.9791	0.8906	0.5578	1.0134	0.8746	0.7437
3865	dCMP	Nucleotide	Pyrimidine Metabolism, Cytidine containing	533	LC/MS Pos Early	298	975	308.064	13945	1032-65-1	C00239	HMDB01202	1.136	1.1058	1.6127	0.671	0.5409	1.3721	0.8866	1.6347	1.3862	1.7869	1.2172	0.5409	0.9725	1.0275	0.9188	0.9291	1.2446	1.2495	0.5409	0.7025	0.7014
1487	2-hydroxyadipate	Lipid	Fatty Acid, Dicarboxylate	31934	LC/MS Polar	100001153	3000	161.046	193530	18294-85-4	C02360	HMDB00321	1.2101	0.587	1.0686	0.4496	0.4101	0.9235	0.8347	0.9314	2.0864	0.5189	1.6707	0.4498	0.6924	3.2587	2.5832	0.7984	1.7137	1.101	0.7205	0.4936	1.2651
501	2-hydroxybutyrate/2-hydroxyisobutyrate	Amino Acid	Glutathione Metabolism	52281	LC/MS Polar	100008928	1258	103.04					0.7568	0.9536	1.5433	1.3744	1.5328	0.8993	0.765	1.0006	0.5605	1.6827	1.8356	0.6133	1.1867	0.9494	2.5095	0.9994	1.5222	0.9122	0.9745	0.8754	1.7748
1483	2-hydroxyglutarate	Lipid	Fatty Acid, Dicarboxylate	52294	LC/MS Pos Early	100002070	958	166.071	43	40951-21-1	C02630	HMDB0059655	0.7742	0.7396	1.0411	0.4738	0.6615	1.3263	1.1404	1.4521	0.9249	0.9812	0.7494	0.6242	0.5258	1.0835	1.3806	1.1861	1.2335	1.6923	1.0865	0.9736	1.1448
1725	2-hydroxyheptanoate*	Lipid	Fatty Acid, Monohydroxy	61827	LC/MS Polar	100019960	925	145.087	2750949				0.2834	1.0116	1.5019	0.9884	1.0996	0.7281	1.0442	0.9764	0.5388	0.8926	0.6559	0.7185	0.7791	1.3785	1.137	1.4481	1.2867	1.3044	1.3413	1.1623	1.2687
1730	2-hydroxypalmitate	Lipid	Fatty Acid, Monohydroxy	35675	LC/MS Neg	100001579	5511.2	271.228	92836	764-67-0		HMDB31057	0.6395	0.9378	1.4608	0.8947	0.6395	3.7086	1.33	1	1.3531	1.0456	0.7524	1.0092	2.4744	3.261	0.8458	0.7984	0.7941	0.8963	1.3265	0.9499	1.9598
1732	2-hydroxystearate	Lipid	Fatty Acid, Monohydroxy	17945	LC/MS Neg	1239	5695	299.259	69417	629-22-1	C03045		0.9555	0.9813	1.6738	1	1.2348	2.5392	1.4292	0.7229	0.818	0.9102	1.1102	1	1.7973	3.7181	0.7295	1.302	1.19	0.9	0.8791	0.9578	1.7303
1211	2-ketogulonate	Carbohydrate	Fructose, Mannose and Galactose Metabolism	15306	LC/MS Polar	100000092	2794.7	193.035	50	342385-52-8	C15673	HMDB11732	2.0899	0.9231	2.2571	1.7714	1.3697	0.3116	0.4046	0.0953	0.4428	0.2704	0.4342	0.1593	0.1003	1.2452	1.7995	1.0769	0.8387	1.4919	0.2411	1.4097	0.5269
340	2-methylbutyrylglycine (C5)	Amino Acid	Leucine, Isoleucine and Valine Metabolism	31928	LC/MS Neg	100001155	1884	158.082	193872	52320-67-9		HMDB00339	0.8566	1.0681	0.6619	0.9695	1.2056	1.2012	0.4247	0.8971	0.4247	0.5205	0.8918	0.7342	0.4589	1.5088	1.3752	1.5053	1.2118	0.4247	1.3442	1.0618	1.0305
1301	2-methylcitrate/homocitrate	Energy	TCA Cycle	52282	LC/MS Neg	100008929	575	205.035					0.4093	0.622	1.0073	0.7968	1.4052	1.3661	1.8064	1.3795	0.4778	0.2108	0.6246	0.743	1.2471	3.0305	1.1107	2.0477	1.2783	0.9852	0.9927	1.591	1.7576
421	2-oxoarginine*	Amino Acid	Urea cycle; Arginine and Proline Metabolism	55072	LC/MS Pos Early	100002784	1760	174.087	558	3715-10-04	C03771	HMDB04225	2.5173	1.3065	1.3754	0.4608	0.5044	0.7317	1.1057	0.479	0.9751	1.0249	0.967	0.5028	0.2659	1.7297	1.6659	0.5614	2.5454	1.3294	0.7103	0.9365	0.6027
1084	2-phosphoglycerate	Carbohydrate	Glycolysis, Gluconeogenesis, and Pyruvate Metabolism	35629	LC/MS Polar	100000093	4550	184.986	59	70195-25-4	C00631	HMDB03391	0.19	0.5865	1.3707	1.2048	1.1466	0.19	0.3867	0.19	0.19	0.5991	0.6331	0.19	0.19	1.4219	1.3202	1.8657	1.1991	1.0671	0.626	0.7994	1.0319
1793	2R,3R-dihydroxybutyrate	Lipid	Fatty Acid, Dihydroxy	63109	LC/MS Polar	100002367	1543	119.035		759-06-8		HMDB00498	0.8242	0.8967	1.1051	1.3392	1.0218	0.9145	0.7364	0.4849	0.9379	1.7859	1.6878	1.3425	1.9647	0.7723	0.7692	0.9782	1.3719	2.2425	0.5767	0.4849	0.4849
1792	2S,3R-dihydroxybutyrate	Lipid	Fatty Acid, Dihydroxy	62950	LC/MS Polar	100002284	1660	119.035	10964471	5057-93-2		HMDB02453	0.3962	1.0402	0.6873	0.6776	0.5134	0.3962	1.0186	1.3219	3.056	4.304	3.3359	1.3753	0.6421	0.7732	0.6048	1.3785	1	2.3881	0.3962	0.3962	0.7459
167	3-(4-hydroxyphenyl)lactate (HPLA)	Amino Acid	Tyrosine Metabolism	32197	LC/MS Neg	240	1379	181.051	9378	6482-98-0	C03672	HMDB00755	1.2659	1.1146	1.3957	0.8903	0.8423	0.7428	0.6646	0.7107	0.6752	1.2306	1.0538	0.2896	0.4535	1.3447	2.0046	0.9339	2.013	1.1778	0.9462	0.9389	0.9034
419	3-amino-2-piperidone	Amino Acid	Urea cycle; Arginine and Proline Metabolism	62853	LC/MS Pos Early	100020361	2065	115.087	5200225	1892-22-4		HMDB00323	0.4342	1.0524	1.7718	1	1.1262	0.6995	1.431	0.4342	1.8319	0.4342	1.0293	0.4342	4.4975	0.4342	0.8609	0.982	0.6553	0.6952	0.8116	0.4342	0.7619
3884	3-aminoisobutyrate	Nucleotide	Pyrimidine Metabolism, Thymine containing	1566	LC/MS Pos Early	1114	2190	104.071	64956	10569-72-9;214139-20-5	C05145	HMDB03911	0.9528	0.8562	0.4193	0.7824	0.9377	0.4193	1.7125	0.4193	0.9454	0.5327	1.0472	0.4193	0.4193	2.5061	2.3298	1.1002	2.1534	1.6078	0.4193	0.7742	0.4193
508	3'-dephospho-CoA-glutathione*	Amino Acid	Glutathione Metabolism	62807	LC/MS Neg	100020899	1690	495.101					0.4446	1.485	1.196	0.9983	0.8147	0.782	0.8099	1.0732	0.5401	0.7003	0.843	0.5778	1.0803	1.2643	0.659	1.8604	1.0017	0.983	1.2251	1.114	1.0779
3938	3'-dephosphocoenzyme A	Cofactors and Vitamins	Pantothenate and CoA Metabolism	18289	LC/MS Neg	100000138	2013	686.142	444485	3633-59-8	C00882	HMDB01373	0.5581	1.7036	1.308	1.1487	0.98	0.1563	0.3255	0.3941	0.2278	0.4566	0.3555	0.1956	0.4492	1.1162	1.1536	1.6531	1.3043	1.2537	1.02	1.0557	0.9037
2854	3-hydroxy-3-methylglutarate	Lipid	Mevalonate Metabolism	531	LC/MS Polar	112	2850	161.046	1662	503-49-1	C03761	HMDB00355	1.1314	0.5885	0.737	0.6105	0.5813	1.1909	1.1537	1.6657	1.5252	1.1496	1.3167	0.7596	0.743	1.5065	1.8409	1.3664	0.8686	1.4798	0.6835	1.5143	0.7748
1488	3-hydroxyadipate*	Lipid	Fatty Acid, Dicarboxylate	62069	LC/MS Polar	100004396	3131	161.046	151913			HMDB00345	0.5485	0.7869	0.9338	0.7618	0.9841	1.2056	1.2057	2.1219	4.5173	1.5923	3.1401	0.5292	1.0159	1.0538	0.9137	2.8555	0.9686	0.6647	0.4809	0.7209	0.5637
1705	3-hydroxybutyrate (BHBA)	Lipid	Ketone Bodies	542	LC/MS Polar	254	1480	103.04	441	625-72-9	C01089	HMDB00357	0.6125	0.9629	0.9471	1.018	1.1231	0.9876	0.7981	1.2883	0.7785	1.1952	1.2015	0.2415	0.6913	1.3896	0.8818	1.918	1.0638	1.504	0.9432	2.0395	1.4567
1622	3-hydroxybutyroylglycine	Lipid	Fatty Acid Metabolism (Acyl Glycine)	62064	LC/MS Neg	100020211	889	160.061					0.5912	0.8718	0.7343	1.0379	0.8475	2.0722	0.4207	2.2603	1.6873	2.3063	2.1763	1.3193	0.9015	0.9397	0.6849	1.7027	0.9813	1.0187	1.1133	2.4631	1.6943
1742	3-hydroxydecanoate	Lipid	Fatty Acid, Monohydroxy	22053	LC/MS Neg	100000997	4634.7	187.134	26612	5561-87-5		HMDB02203	0.7785	1.037	0.6284	0.7921	3.9188	2.6313	0.8078	0.8595	1.0984	1.1565	1.2001	1.2002	2.603	4.3388	0.7917	0.782	0.6045	0.8641	0.963	1.8733	5.0309
1507	3-hydroxydodecanedioate*	Lipid	Fatty Acid, Dicarboxylate	62915	LC/MS Neg	100001454	2252	245.139	16663321	34574-69-1		HMDB00413	0.4902	0.8984	0.627	0.9744	0.9606	1.7141	1.3408	1.6614	2.1257	1.3855	1.6429	1.1858	1.097	0.474	0.6132	0.9759	0.6212	0.9044	1.0241	3.1678	1.2496
1739	3-hydroxyhexanoate	Lipid	Fatty Acid, Monohydroxy	53230	LC/MS Polar	100006367	1082	131.071	151492	10191-24-9			0.8468	1	0.5731	1.3531	1.4183	1.3179	0.5789	1.4018	1.137	1.3941	1.1723	0.9487	0.9336	0.6163	0.7101	1.1471	0.8518	0.5731	1.1084	0.7167	1.0601
1692	3-hydroxyhexanoylcarnitine (1)	Lipid	Fatty Acid Metabolism (Acyl Carnitine, Hydroxy)	62557	LC/MS Pos Early	100020825	2918	276.181					0.4412	0.5442	0.4312	2.2823	2.3447	1.6747	0.9768	2.2624	0.9392	2.3989	2.2097	1.3573	0.8812	0.7855	0.9325	0.4312	0.857	2.7954	1.4446	1.2872	1.1227
1749	3-hydroxyoleate*	Lipid	Fatty Acid, Monohydroxy	61843	LC/MS Neg	100019966	5508	297.243					0.4807	1.0228	0.6394	0.6109	0.9814	2.1555	0.7988	0.9451	1.1739	1.0979	0.9749	1.2095	1.836	1.3633	0.4008	0.5258	0.6164	1.0066	1.2671	0.9934	1.7164
1697	3-hydroxyoleoylcarnitine	Lipid	Fatty Acid Metabolism (Acyl Carnitine, Hydroxy)	61840	LC/MS Pos Late	100019801	1406	442.353					1.7703	1.0094	0.8174	1.0293	0.7028	0.9906	1.2021	0.8666	1.0755	1.5298	1.1322	0.6094	0.9357	1.9639	0.3978	0.9768	0.876	2.2396	1.5695	1.3554	0.7815
1747	3-hydroxypalmitate	Lipid	Fatty Acid, Monohydroxy	27503	LC/MS Neg	100000983	5476	271.228	301590	928-17-6		HMDB10734	0.6987	0.9016	0.5666	0.9832	1.2104	3.2865	1.2098	1.0916	1.2088	0.7834	0.7096	1.6599	4.7862	2.5412	0.2994	0.7888	0.6548	0.8712	1.662	0.9487	2.5681
1696	3-hydroxypalmitoylcarnitine	Lipid	Fatty Acid Metabolism (Acyl Carnitine, Hydroxy)	61839	LC/MS Pos Late	100019800	1380	416.337					1.42	0.9278	0.6874	0.9382	0.6469	1.5633	1.5602	1.3447	0.8774	1.0618	1.1125	0.8874	1.6683	2.0491	0.2868	1.2446	0.5975	2.107	1.7151	1.1926	0.8922
1778	3-hydroxystearate	Lipid	Fatty Acid, Monohydroxy	52938	LC/MS Neg	100008933	5674	299.259	5282907	45261-96-9			0.7632	1.2227	0.9776	0.794	0.9475	2.9458	1.7408	1.1677	0.6928	0.9612	1.1735	0.945	2.9502	2.3663	0.7353	1.0983	0.8977	0.9294	1.4095	1.0264	1.576
1741	3-hydroxysuberate	Lipid	Fatty Acid, Monohydroxy	31936	LC/MS Polar	100001143	3000	189.077	22328017	73141-47-6		HMDB00325	0.6578	1.0568	1.2454	1.0683	0.8341	1.0377	1.3148	1.8341	0.6305	0.5177	0.9623	0.6899	1.2674	1.6601	1.1375	2.0717	0.8416	0.8412	0.6434	0.6779	0.653
1489	3-methyladipate	Lipid	Fatty Acid, Dicarboxylate	36749	LC/MS Polar	100001765	2865	159.066	12292	3058-01-03		HMDB00555	1.1539	0.7972	2.847	1.6073	1.382	0.5739	0.8187	0.1608	0.1608	0.9193	0.1608	0.1608	0.6891	1.3984	2.3096	1.3278	1.2019	2.2096	0.1608	0.4641	0.7499
1482	3-methylglutarate/2-methylglutarate	Lipid	Fatty Acid, Dicarboxylate	54676	LC/MS Polar	100010834	2832	145.051				HMDB00752	0.8774	0.8022	1.0387	1.0588	0.4148	0.274	1.0757	0.4222	1.1647	0.8758	1.0247	0.68	0.274	1.2872	0.9753	1.5477	0.6084	1.2698	1.131	1.0974	0.274
68	3-methylhistidine	Amino Acid	Histidine Metabolism	15677	LC/MS Pos Early	100000042	2670	170.092	64969	368-16-1	C01152	HMDB00479	0.7197	1.1691	0.7314	1.0245	0.3139	1.6221	1.0061	1.1976	1.0585	2.4294	4.1905	4.9359	0.8798	0.6704	0.9558	2.4995	0.682	0.3139	0.3139	0.7298	0.6884
1085	3-phosphoglycerate	Carbohydrate	Glycolysis, Gluconeogenesis, and Pyruvate Metabolism	1414	LC/MS Neg	132	583	184.986	724	80731-10-8	C00597	HMDB00807	0.5893	1.0085	1.5789	1.4374	1.1601	0.7665	0.6144	0.9915	0.7096	1.0446	0.9116	0.4106	0.2621	1.2433	1.5962	1.7537	1.5544	1.3627	0.9554	0.9501	0.753
411	3-sulfo-L-alanine	Amino Acid	Methionine, Cysteine, SAM and Taurine Metabolism	47089	LC/MS Polar	382	2890	167.997	72886	498-40-8	C00506	HMDB02757	1.5743	1.6339	1.0688	0.7933	0.539	0.8194	1.013	0.8028	3.3736	2.3168	1.7161	1.2447	1.0142	0.566	0.3854	0.8001	0.987	0.9361	0.7924	0.4339	0.4467
3845	3-ureidopropionate	Nucleotide	Pyrimidine Metabolism, Uracil containing	3155	LC/MS Pos Early	1053	875	133.061	111	462-88-4	C02642	HMDB00026	1.3538	0.6488	1.5861	0.7733	0.7873	1.6931	0.9659	1.2856	0.2784	1.2718	1.4108	0.17	0.8593	0.9157	2.65	1.0341	0.7846	1.0521	0.4995	1.3171	1.1246
485	4-guanidinobutanoate	Amino Acid	Guanidino and Acetamido Metabolism	15681	LC/MS Pos Early	100000096	2320	146.092	500	463-003;463-00-3	C01035	HMDB03464	1.8543	0.8989	1.3156	0.373	0.3731	1.7959	1.1444	0.357	0.1287	0.5117	0.1098	0.0982	0.5895	2.0379	2.0496	0.2434	1.7567	1.677	1.1139	0.9286	0.8873
48	4-hydroxyglutamate	Amino Acid	Glutamate Metabolism	40499	LC/MS Pos Early	100002544	1141	164.055	439902	2485-33-8	C03079	HMDB01344	1.6642	0.6326	1	0.4554	0.7234	0.9043	1.6864	0.4554	0.4554	0.576	0.9904	0.4554	0.5586	2.0188	2.9088	0.5738	1.6582	1.5306	1.2961	1.3325	0.6981
4050	4-hydroxyhippurate	Xenobiotics	Benzoate Metabolism	35527	LC/MS Neg	100001423	1475	194.046	151012	2482-25-9		HMDB13678	0.7433	1.1403	2.2045	1.4763	1.5141	0.6165	0.8412	0.9872	0.3989	0.9454	0.8949	0.486	0.7532	1.4108	2.4236	1.882	1.6382	2.0276	1.6065	0.92	1.0894
507	4-hydroxy-nonenal-glutathione	Amino Acid	Glutathione Metabolism	48487	LC/MS Neg	100006240	3319.2	462.192		99927-70-5			0.6361	1.0028	1.7083	1.2258	0.9207	0.3192	0.4691	0.7002	0.147	0.147	0.3833	0.1842	0.2102	1.7605	2.0255	2.0389	1.8224	1.7335	1.0909	1.2258	0.9656
162	4-hydroxyphenylpyruvate	Amino Acid	Tyrosine Metabolism	1669	LC/MS Neg	1141	1690	179.035	979	156-39-8	C01179	HMDB00707	0.4379	0.4379	0.518	0.7113	1.7495	1.2701	0.4797	0.4379	0.4379	0.4379	0.4379	1.5944	2.5137	1.091	0.8871	0.4379	0.4379	0.4379	0.7914	0.9389	1.1485
89	4-imidazoleacetate	Amino Acid	Histidine Metabolism	32349	LC/MS Pos Early	100001207	2055	127.05	96215	645-65-8	C02835	HMDB02024	1.1104	1.1452	1.5345	0.8813	0.834	0.7164	0.6619	0.976	1.024	2.0874	0.8577	0.6056	0.88	0.8663	1.4273	1.0523	1.0575	1.2573	0.6638	0.6571	0.9477
295	4-methyl-2-oxopentanoate	Amino Acid	Leucine, Isoleucine and Valine Metabolism	22116	LC/MS Neg	100000551	2170	129.056	70	816-66-0	C00233	HMDB00695	0.5948	0.2713	0.2713	1.027	1.2362	1.5297	0.973	0.2713	0.7058	0.6963	0.7833	6.3275	2.6277	0.7411	1.4629	0.2713	0.2713	0.2713	1.052	1.206	0.8337
4081	4-methylcatechol sulfate	Xenobiotics	Benzoate Metabolism	46146	LC/MS Neg	100004111	2665	203.002					0.909	0.3866	0.3866	0.8138	1.1562	0.3866	1.2812	0.6085	0.7291	0.8385	1.5422	2.3232	1.5466	1.0391	0.9609	0.8847	1.0623	1.7992	1.1404	1.0703	0.9362
1610	4-methylhexanoylglycine	Lipid	Fatty Acid Metabolism (Acyl Glycine)	62736	LC/MS Neg	100020632	3550	186.114					0.6763	1.1591	0.6763	0.7911	0.7167	0.6763	0.6763	0.6763	0.6763	1.1948	1.3285	0.9186	0.6763	0.6934	0.9482	0.6763	1.1349	1	0.6763	1.0647	0.6763
111	5-(galactosylhydroxy)-L-lysine	Amino Acid	Lysine Metabolism	43582	LC/MS Pos Early	100002462	2755	325.161		32448-36-5			0.5047	1.1096	0.8413	0.8492	1.3041	2.3687	0.5047	0.9216	1.495	1.352	0.9448	0.5656	1.0611	1.979	0.9327	0.9809	1.0773	1.1436	0.9186	1.1517	0.774
1334	5-dodecenoate (12:1n7)	Lipid	Medium Chain Fatty Acid	33968	LC/MS Neg	100001232	5224	197.155	5312378	2430-94-6		HMDB00529	0.6159	0.8788	1.3386	0.7829	0.9434	1.2044	0.7529	1.322	1.5412	1.3712	1.5177	0.8985	1.565	1.0238	1.3474	0.9248	0.9369	0.9206	0.9762	1.3737	1.2636
479	5-methylthioadenosine (MTA)	Amino Acid	Polyamine Metabolism	1419	LC/MS Pos Early	212	2752	298.097	439176	2457-80-9	C00170	HMDB01173	0.9119	1.1407	1.5426	0.8445	0.9281	0.3693	0.5689	0.3833	0.4943	0.8471	0.6013	0.4471	0.4742	1.1586	1.1725	1.2098	1.3795	1.5059	0.9848	1.1919	1.0386
498	5-oxoproline	Amino Acid	Glutathione Metabolism	1494	LC/MS Neg	1021	738.5	128.035	7405	98-79-3	C01879	HMDB00267	0.8842	1.0423	2.318	0.9248	0.9318	0.9537	1.0831	0.8327	0.8358	1.196	1.4856	1.073	0.697	1.3108	1.4127	1.3259	1.0967	1.3476	0.9305	1.0092	0.9101
3111	6-beta-hydroxylithocholate	Lipid	Secondary Bile Acid Metabolism	36807	LC/MS Neg	100001625	4830	391.285	5283821	668-49-5	C15515	HMDB00811	0.9166	1.3254	1.843	1.8937	1.7954	1.2506	0.7803	0.4672	0.3662	0.3192	0.3128	0.2423	0.3658	2.623	1.0834	1.0951	0.7543	0.6406	2.0578	1.0994	0.7184
1094	6-phosphogluconate	Carbohydrate	Pentose Phosphate Pathway	15442	LC/MS Neg	100000341	583.9	275.017	91493	921-62-0;53411-70-4	C00345	HMDB01316	0.8024	1.2305	1.4917	1.6341	1.5263	1.7221	0.282	0.5097	0.8695	0.7562	0.9167	0.7766	0.3113	1.7616	0.379	1.5867	0.8597	1.3379	1.8008	1.2951	1.4338
2880	7-HOCA	Lipid	Sterol	36776	LC/MS Neg	100001609	5288.1	429.301	3081085	115538-85-7	C17337	HMDB12458	1.4653	0.6383	1.3147	0.9345	0.5977	1.3978	1.7941	0.6454	0.5425	0.4007	0.4758	0.6891	1.1486	2.6365	2.3157	0.8416	1.5404	0.5526	1.0727	0.5522	1.0655
2914	7-hydroxycholesterol (alpha or beta)	Lipid	Sterol	47890	LC/MS Pos Late	100005999	1930	367.336	107722			HMDB06119	0.4083	1.0957	1.3582	1.1684	0.9242	1.0903	0.8453	0.8804	0.7219	0.3389	0.559	0.704	0.9581	2.0837	1.3372	1.8146	1.2931	1.462	1.2331	1.1662	1.0419
3153	7-ketodeoxycholate	Lipid	Secondary Bile Acid Metabolism	31904	LC/MS Neg	100001063	4821	405.265	188292	911-40-0		HMDB00391	1.005	0.5194	1.5793	2.0405	2.1127	0.6314	4.576	0.2893	0.1208	0.2667	0.3754	0.375	0.3078	7.8357	4.1304	1.9304	1.9341	0.4112	1.0222	1.6128	1.1855
1790	9,10-DiHOME	Lipid	Fatty Acid, Dihydroxy	38399	LC/MS Neg	179	5180	313.238	9966640	263399-34-4	C14828	HMDB04704	0.924	0.4199	1.0308	1.2652	0.5218	1.2642	1.2275	0.8434	1.5376	0.6087	0.7435	0.742	1.2444	0.9962	1.3603	1.065	1.2758	1.1682	0.5337	0.2769	0.6825
1629	acetylcarnitine (C2)	Lipid	Fatty Acid Metabolism (Acyl Carnitine, Short Chain)	32198	LC/MS Pos Early	100000802	2282	204.123	1	5080-50-2	C02571	HMDB00201	0.5981	0.3684	0.4712	0.2745	0.3172	1.962	1.4343	0.9597	1.6395	1.0603	1.0403	0.9276	1.0643	1.8917	0.7974	0.7482	1.1866	1.3421	2.7971	1.2007	0.7343
1304	acetylphosphate	Energy	Oxidative Phosphorylation	15488	LC/MS Polar	1211	4013.9	138.98	186	94249-01-1	C00227	HMDB01494	0.6574	1.1147	0.9846	1.5197	1.5703	0.8417	0.5711	0.9541	1.1048	1.2986	0.914	0.3007	0.4138	1.2359	0.9375	1.0154	1.1856	1.3943	1.5828	1.0855	1.608
1281	aconitate [cis or trans]	Energy	TCA Cycle	46173	LC/MS Neg	100001359	580	173.009					2.0113	1.1916	0.1481	0.3348	0.5979	3.2234	1.1436	0.7462	1.9497	2.1239	1.9831	2.6975	2.7751	0.5812	0.1959	0.1376	0.187	1.0199	1.9229	0.9801	1.3663
3758	adenine	Nucleotide	Purine Metabolism, Adenine containing	554	LC/MS Pos Early	880	2221	136.062	190	73-24-5	C00147	HMDB00034	1.0493	1.5313	1.2558	1.3732	1.4076	0.5742	0.6058	0.646	0.322	0.4816	0.5077	0.3034	0.5501	1.2642	1.5402	1.2537	1.1138	0.9507	0.7788	0.864	0.9102
3757	adenosine	Nucleotide	Purine Metabolism, Adenine containing	555	LC/MS Pos Early	798	2169	268.104	60961	58-61-7	C00212	HMDB00050	0.7793	1.3463	0.8286	1.2664	1.5657	0.6282	0.4766	0.5714	0.419	0.4953	0.4636	0.5702	1.1624	1.0495	1.0264	1.0067	1.0239	1.0446	0.9933	1.1226	1.5233
3752	2'-AMP	Nucleotide	Purine Metabolism, Adenine containing	36815	LC/MS Neg	100001694	1497.7	346.056	94136	130-49-4	C00946	HMDB11617	1.2448	1.1671	1.0713	1.3838	1.3279	1.2886	1.1738	0.9696	0.3421	0.4652	0.6256	0.7395	0.9943	1.6448	1.3731	1.6975	0.8106	0.9885	1.0057	1.6235	0.9746
3755	adenosine 3',5'-diphosphate	Nucleotide	Purine Metabolism, Adenine containing	15691	LC/MS Neg	1214	575	426.022	159296	75431-54-8	C00054	HMDB00061	0.451	0.889	1.8935	0.7674	0.6155	0.885	1.0751	2.5671	1.0001	1.0504	1.4347	0.7291	0.3137	1.551	1.1505	3.9298	1.0891	0.8758	0.4869	1.2516	0.9999
3751	3'-AMP	Nucleotide	Purine Metabolism, Adenine containing	35142	LC/MS Neg	100001449	1245	346.056	41211	84-21-9	C01367	HMDB03540	3.629	3.2541	2.0865	0.1991	0.1991	0.7069	0.5569	7.3555	4.3171	1	0.8842	0.1991	0.1991	0.8213	0.1991	2.2265	1.8495	0.5136	0.1991	0.1991	0.1991
3926	adenosine 5'-diphosphoribose (ADP-ribose)	Cofactors and Vitamins	Nicotinate and Nicotinamide Metabolism	558	LC/MS Pos Early	215	553	560.079	192	68414-18-6	C00301	HMDB01178	0.3995	1.6722	1.8644	1.2826	1.1289	0.3279	0.4408	0.7143	0.4896	0.7794	0.7552	0.2763	0.1815	1.2838	1.2974	1.0847	1.4968	1.1209	0.8961	0.7423	0.9153
3750	AMP	Nucleotide	Purine Metabolism, Adenine containing	32342	LC/MS Pos Early	209	1013	348.07	6083	149022-20-8	C00020	HMDB00045	0.787	1.1128	1.3421	0.7481	0.7303	0.8084	0.8101	1.1563	0.7323	0.6886	0.9484	0.5069	0.7206	1.2704	1.2435	1.0683	1.3001	1.2495	1.0114	1.2132	0.9886
3756	adenylosuccinate	Nucleotide	Purine Metabolism, Adenine containing	18360	LC/MS Neg	1303	560	230.53	195	19046-78-7	C03794	HMDB00536	0.2957	0.4848	1.8	0.2957	0.2957	0.526	0.9629	1.0371	0.2957	0.2957	1.0708	0.2957	0.2957	1.4532	0.8358	2.0591	1.2897	0.4458	0.2957	1.3594	0.6769
1485	adipate	Lipid	Fatty Acid, Dicarboxylate	21134	LC/MS Polar	100000863	3000	145.051	196	124-04-9	C06104	HMDB00448	0.2313	0.6666	0.2313	0.7901	1.1243	0.2313	0.258	0.9791	1.1622	0.4742	1.4451	1.0718	0.2313	1.0209	0.4585	0.4766	1.4028	1.1935	1.0747	0.3554	1.6757
1680	adipoylcarnitine (C6-DC)	Lipid	Fatty Acid Metabolism (Acyl Carnitine, Dicarboxylate)	52988	LC/MS Pos Early	100006614	2570	290.16	71296139			HMDB61677	0.5591	0.8378	1.0411	0.7591	0.743	2.499	1.184	2.1014	0.8151	0.7751	1.8278	1.2055	1.5619	2.0542	1.2531	2.7025	0.7825	0.9589	0.6741	1.0836	0.8513
1398	adrenate (22:4n6)	Lipid	Long Chain Polyunsaturated Fatty Acid (n3 and n6)	32980	LC/MS Neg	100001193	5678	331.264	5497181	2091-25-0	C16527	HMDB02226	0.8944	0.6968	0.6326	0.9385	0.9946	6.9008	1.6443	1.0054	2.1517	3.0262	1.5097	1.8545	3.1045	3.2063	0.5013	0.7435	0.4948	0.8516	0.6396	1.013	2.3442
28	alanine	Amino Acid	Alanine and Aspartate Metabolism	1126	LC/MS Pos Early	811	1700	90.055	5950	56-41-7	C00041	HMDB00161	1.0145	1.0556	1.1416	1.1015	1.0617	1.2547	0.7991	0.886	1.2227	0.9583	1.2004	0.9927	1.0073	1.1507	0.9226	0.8306	0.7383	0.6959	0.6488	0.639	0.6346
578	alanylleucine	Peptide	Dipeptide	37093	LC/MS Pos Early	100001890	3055	203.139	259583	1638-60-4		HMDB28691	0.8567	2.0463	0.6026	0.7377	0.5171	1.0199	2.4509	1.4482	4.6651	3.0857	1.884	3.6864	1.4183	0.9801	0.2552	1.2291	0.8644	0.9022	2.1488	0.8536	0.6692
3745	allantoic acid	Nucleotide	Purine Metabolism, (Hypo)Xanthine/Inosine containing	33434	LC/MS Polar	218	2960	175.047	203	99-16-1	C00499	HMDB01209	1.0194	0.8704	1.4594	0.8945	0.8016	0.3212	1.0433	0.8726	0.5058	0.9597	0.9031	0.2171	0.2755	1.47	1.3662	1.1648	1.9688	1.6005	1.0218	0.9806	0.8491
3744	allantoin	Nucleotide	Purine Metabolism, (Hypo)Xanthine/Inosine containing	1107	LC/MS Polar	1002	1672	157.037	204	97-59-6	C02350	HMDB00462	0.719	0.9873	1.3845	0.9061	0.8559	0.8984	1.0127	1.0231	0.6267	0.756	0.9569	0.424	0.4967	1.4062	1.3055	1.0864	1.4329	1.1319	1.1586	1.0733	0.9325
3966	alpha-CEHC sulfate	Cofactors and Vitamins	Tocopherol Metabolism	47666	LC/MS Neg	100005972	3090	357.101					0.9618	1	0.4452	0.6165	0.5137	0.4452	0.4452	0.4452	0.4452	0.4452	0.4825	0.4452	0.4452	0.6579	1.7766	0.4452	1.3775	1.1942	0.4452	0.5392	1.0161
44	alpha-ketoglutaramate*	Amino Acid	Glutamate Metabolism	62101	LC/MS Polar	100002397	1916	144.03		18465-19-5			0.9832	1.0797	1.3745	0.9506	0.8854	0.7671	0.8239	0.5949	1.6062	2.4442	1.0168	0.5149	0.621	1.2249	1.2139	0.652	1.3577	1.0487	0.8081	0.564	0.9099
1285	alpha-ketoglutarate	Energy	TCA Cycle	528	LC/MS Polar	93	2700	145.014	51	305-72-6;328-50-7;22202-68-2	C00026	HMDB00208	0.9265	1.0729	0.9703	0.9857	1.103	1.197	1.1106	0.8717	0.9841	0.9882	1.0118	0.7958	1.0226	1.1718	1.1741	0.8894	0.6669	1.1029	0.8205	1.1244	1.0353
3087	alpha-muricholate	Lipid	Primary Bile Acid Metabolism	34092	LC/MS Neg	100001280	4765	407.28	3083761	2393-58-0	C17647	HMDB00506	0.9951	1.2024	1.7322	1.6363	1.3652	1.3121	1.2121	0.414	0.1872	0.3945	0.2065	0.2189	0.2885	2.8556	1.2765	1.283	0.563	0.3774	1.0049	0.984	0.5088
3955	alpha-tocopherol	Cofactors and Vitamins	Tocopherol Metabolism	1561	LC/MS Pos Late	1105	2522	430.378	14985	59-02-9;10191-41-0	C02477	HMDB01893	1.2491	1.8371	1.3995	0.5653	0.6278	0.3051	1.1434	0.1768	0.112	0.7823	0.1813	0.1634	0.1095	1.0418	1.6207	0.8996	1.4331	1.3312	1.0101	0.9098	0.9899
81	anserine	Amino Acid	Histidine Metabolism	15747	LC/MS Pos Early	100000044	2924	241.13	112072	10030-52-1	C01262	HMDB00194	0.9178	0.8637	1.2245	0.6054	0.6213	0.4092	0.7795	0.4157	0.4092	1.2577	0.4092	0.4092	0.4092	1.4479	1.2304	1.1814	1.1799	1.0822	0.4991	0.7837	0.8131
1125	arabitol/xylitol	Carbohydrate	Pentose Metabolism	48885	LC/MS Polar	100006430	1932.4	151.061	6912		C01904		1.0103	0.9897	1.3009	1.0467	0.8777	0.4583	0.4726	0.3789	0.4327	0.5178	0.4814	0.3203	0.376	1.1702	1.0752	1.0161	1.7087	1.1658	0.5575	1.0493	0.7909
1131	arabonate/xylonate	Carbohydrate	Pentose Metabolism	48255	LC/MS Polar	100006115	2700	165.041					1.4973	1.0649	1.3184	1.0361	0.845	0.564	0.5663	0.4794	0.9863	1.1169	0.5259	0.309	0.252	1.018	0.7166	1.0137	1.4135	1.7513	0.7094	0.6029	0.6253
1343	arachidate (20:0)	Lipid	Long Chain Saturated Fatty Acid	1118	LC/MS Neg	893	6240	311.296	10467	506-30-9	C06425	HMDB02212	1.1005	0.9226	1.1624	0.9588	0.9968	2.1944	1.2114	0.9041	1.3836	1.1494	1.0032	0.9721	1.1958	2.017	0.8812	0.719	0.8577	0.874	0.9518	0.9073	1.3985
1396	arachidonate (20:4n6)	Lipid	Long Chain Polyunsaturated Fatty Acid (n3 and n6)	1110	LC/MS Neg	229	5535	303.233	444899	506-32-1	C00219	HMDB01043	1.0018	1.1829	1.1108	0.9982	1.3389	2.4338	1.1557	0.7452	0.7498	0.8666	0.8132	0.8573	1.7501	2.257	0.9876	0.8973	0.8262	0.9202	0.8976	0.8077	1.7386
1670	arachidonoylcarnitine (C20:4)	Lipid	Fatty Acid Metabolism (Acyl Carnitine, Polyunsaturated)	57518	LC/MS Pos Late	100015837	1353	448.342					1.5345	0.5062	1.187	0.6199	0.5373	1.1421	1.8221	0.7468	0.6478	0.8905	1.1579	0.5289	0.887	1.9038	1.1445	1.1095	1.1706	1.5114	0.7464	0.8836	0.5566
1646	arachidoylcarnitine (C20)*	Lipid	Fatty Acid Metabolism (Acyl Carnitine, Long Chain Saturated)	57513	LC/MS Pos Late	100015833	1512	456.405				HMDB06460	0.5352	0.5764	0.8153	0.7666	0.551	1.6578	0.9397	1.1558	0.5535	0.7734	1.0318	1.1017	0.9682	1.708	1.3031	1.2427	1.3814	2.1879	2.5548	1.6979	1.4232
449	argininate*	Amino Acid	Urea cycle; Arginine and Proline Metabolism	57461	LC/MS Pos Early	100002769	2150	176.103	160437	157-07-3		HMDB03148	1.2835	0.3751	1.0444	0.1848	0.1848	0.2663	1	0.4094	2.6114	8.0563	1.1074	0.1848	0.1848	1.892	1.1668	0.3196	1.8327	0.9638	0.845	0.5964	0.4864
413	arginine	Amino Acid	Urea cycle; Arginine and Proline Metabolism	1638	LC/MS Pos Early	231	2825	175.119	232	1119-34-2	C00062	HMDB00517	0.7511	1.4681	0.7604	0.919	0.994	1.6481	0.9851	1.3995	3.3278	1.5667	1.4262	3.3879	1.5156	0.9657	0.484	0.7562	0.5691	0.7425	1.3443	0.96	1.174
3945	ascorbate (Vitamin C)	Cofactors and Vitamins	Ascorbate and Aldarate Metabolism	32354	LC/MS Pos Early	233	770	177.039		134-03-2	C00072	HMDB00044	1.6748	0.6491	0.993	1	0.7949	0.1936	1.1399	0.9713	0.0439	0.4441	0.5884	0.0439	0.0747	2.7727	1.5584	1.49	1.6723	2.0118	0.7201	1.3607	0.8091
3946	ascorbic acid 2-sulfate	Cofactors and Vitamins	Ascorbate and Aldarate Metabolism	63590	LC/MS Polar	100009329	3042	254.982	86484				1.3959	1.0847	1.0382	1.0071	0.8531	0.4314	1.5268	0.8574	0.7401	1.0657	0.9661	0.2949	0.4167	1.4751	1.1778	2.5125	1.9035	3.2347	0.7366	1.3234	0.9929
3947	ascorbic acid 3-sulfate*	Cofactors and Vitamins	Ascorbate and Aldarate Metabolism	63687	LC/MS Polar	100020409	2025	254.982	11425365				1.2652	0.9041	1.0278	0.936	0.9121	0.4267	1.0245	0.6901	0.4425	0.6203	0.6029	0.1618	0.2803	1.6782	1.2228	1.5669	1.7063	1.5609	0.7842	1.1333	0.9755
39	asparagine	Amino Acid	Alanine and Aspartate Metabolism	512	LC/MS Pos Early	917	1225	133.061	6267	70-47-3	C00152	HMDB00168	0.8883	1.0917	1.466	0.7231	0.7997	1.0821	1.1742	0.8086	0.9642	1.0089	0.9717	0.7719	0.5999	1.3669	1.1512	1.1682	0.9708	1.0291	1.0148	0.9699	0.8846
35	aspartate	Amino Acid	Alanine and Aspartate Metabolism	443	LC/MS Pos Early	234	1165	134.045	5960	56-84-8	C00049	HMDB00191	1.0115	1.1139	1.7302	0.9538	0.9958	0.9782	1.3685	0.9509	0.8412	0.8907	1.0947	0.7478	0.7091	1.2573	1.3318	1.1228	1.1136	0.9679	0.8042	0.8759	0.7687
1499	azelate (nonanedioate; C9)	Lipid	Fatty Acid, Dicarboxylate	18362	LC/MS Neg	2029	1276	187.098	2266	123-99-9	C08261	HMDB00784	0.5428	0.9854	1.2275	0.8523	1.2661	0.6303	1.0448	1.0146	1.4668	0.8113	0.9486	0.6008	0.7364	1.1219	0.8305	1.2768	1.4511	0.9671	1.2771	1.0386	0.9138
1345	behenate (22:0)*	Lipid	Long Chain Saturated Fatty Acid	12125	LC/MS Neg	314	6745	339.327	8215	112-85-6	C08281	HMDB00944	1.0909	0.748	0.8414	0.8516	0.9831	3.577	1.8069	1.0721	1.4002	1.0169	0.9101	1.2077	2.5367	3.4429	0.9108	0.6215	0.6607	0.7177	0.8608	0.7874	1.4266
4056	benzoate	Xenobiotics	Benzoate Metabolism	15778	LC/MS Neg	100000008	1750	121.029	243	65-85-0	C00180	HMDB01870	0.9185	0.9654	4.6132	1.1296	0.9544	1.8596	1.2074	1.5702	5.1653	0.9398	1.5808	1.7224	0.7338	0.9864	0.8986	0.6892	0.7002	1.0136	1.8725	1.3663	1.0214
3846	beta-alanine	Nucleotide	Pyrimidine Metabolism, Uracil containing	55	LC/MS Pos Early	244	1905	90.055	239	56-41-7;107-95-9	C00099	HMDB00056	0.7757	0.9566	2.972	1.0133	0.9172	0.7415	1.1253	0.5736	0.5228	1.07	1.0231	0.4311	0.2366	1.8072	2.0941	1.7733	2.2719	0.8889	0.7976	0.9867	1.0348
4316	beta-guanidinopropanoate	Xenobiotics	Food Component/Plant	35101	LC/MS Pos Early	100001411	2145	132.077	67701	353-09-3	C03065	HMDB13222	1.0838	0.8205	1.0882	0.6316	0.7659	0.6547	1.7508	0.621	0.5778	1.4925	0.5775	0.4471	0.3484	1.7319	1.4202	0.7238	1.3407	1.6149	0.9162	1.5744	0.8912
312	beta-hydroxyisovalerate	Amino Acid	Leucine, Isoleucine and Valine Metabolism	12129	LC/MS Polar	1442	1149.8	117.056	69362	625-08-1		HMDB00754	1.5042	1.0976	0.6725	0.7481	0.9604	1.8919	1.2114	0.8215	3.8775	2.8224	2.3932	2.6966	2.4954	0.5982	0.5649	0.4004	0.4663	1.1293	1.0524	0.9524	0.7846
6	betaine	Amino Acid	Glycine, Serine and Threonine Metabolism	3141	LC/MS Pos Early	799	1064	118.086	247	107-43-7	C00719	HMDB00043	0.9981	0.8767	1.4728	0.94	0.9123	0.9376	1.0019	0.7425	0.7834	0.7605	1.0349	0.5789	0.8471	0.9405	1.2536	1.0029	1.1557	1.1334	1.077	1.1369	0.9387
7	betaine aldehyde	Amino Acid	Glycine, Serine and Threonine Metabolism	15499	LC/MS Pos Early	1219	1915	120.102	249	7758-31-8	C00576	HMDB01252	1.7391	0.6451	1.9681	1.3671	1.5091	1.5011	1.8082	1.0438	0.7325	1.3127	1.4989	0.7373	0.7478	0.9562	1.2446	1.0897	0.5405	0.7534	0.1772	0.412	0.393
3086	beta-muricholate	Lipid	Primary Bile Acid Metabolism	31885	LC/MS Neg	100001066	4794	407.28	5283853	2393-59-1	C17726	HMDB00415	0.9367	1.0941	2.0235	2.2368	2.1965	0.4006	1.7411	0.5894	0.1725	0.3883	0.2772	0.3855	0.291	5.2156	1.9189	1.2843	0.9234	0.6107	1.8932	1.5356	1.0633
2894	beta-sitosterol	Lipid	Sterol	27414	LC/MS Pos Late	100001033	3054	397.383	222284	83-46-5	C01753	HMDB00852	1.7539	2.0469	1.2463	1.3325	1.1515	0.8997	0.7186	0.348	0.5036	0.8458	0.3893	0.5265	0.5898	0.8697	1.1945	1.0739	0.983	1.3057	1.017	0.86	0.8484
4288	betonicine	Xenobiotics	Food Component/Plant	38100	LC/MS Pos Early	100002153	1012	160.097	164642	515-25-3	C08269	HMDB29412	1.0937	1.2044	0.8386	0.5339	0.5339	0.5339	0.5339	0.5339	0.7376	0.5339	0.5339	0.5339	0.5339	1.0059	0.7157	0.5339	1.3948	0.6514	0.8694	0.5339	0.9941
4000	bilirubin	Cofactors and Vitamins	Hemoglobin and Porphyrin Metabolism	43807	LC/MS Pos Late	1090	1840	585.271	5280352	635-65-4	C00486	HMDB00054	1.6463	0.8155	1.5242	1.0805	0.9199	0.8498	1.7853	0.8829	1.2423	2.1134	1.2782	0.4514	0.6918	1.0068	2.4159	1.257	0.8746	0.677	0.3393	0.6202	0.6344
4003	biliverdin	Cofactors and Vitamins	Hemoglobin and Porphyrin Metabolism	2137	LC/MS Pos Late	250	1016	583.255	5353439	55482-27-4;55482-27-4	C00500	HMDB01008	0.8314	0.5003	0.6701	0.5003	0.5003	0.9123	1.0125	0.5003	2.4623	1.8171	1.3606	1.1143	0.9875	0.5003	0.5003	0.5003	0.5003	0.5003	0.5003	0.5003	0.5003
3984	biopterin	Cofactors and Vitamins	Tetrahydrobiopterin Metabolism	12358	LC/MS Pos Early	1548	1751	238.094	445040	22150-76-1	C06313	HMDB00468	1.0008	0.9214	0.8897	1.1796	1.3888	1.3182	0.5813	1.0271	1.1534	0.9622	1.3872	0.9792	0.8302	1.0601	0.8986	0.7388	1.0059	0.7664	0.8	0.6392	0.9992
1620	butenoylglycine	Lipid	Fatty Acid Metabolism (Acyl Glycine)	61785	LC/MS Neg	100016110	1380	142.051	6303498	71428-89-2			0.695	0.9768	0.9253	0.8718	0.9234	1.4144	0.6932	2.2907	2.5034	3.6034	2.9837	0.9033	0.5974	0.8126	0.6528	1.9484	0.9836	1.4246	1.4555	4.2317	2.6117
1589	butyrylglycine (C4)	Lipid	Fatty Acid Metabolism (also BCAA Metabolism)	31850	LC/MS Neg	100001151	1470	144.067	88412	20208-73-5		HMDB00808	0.9428	1.033	1.3882	0.903	0.913	0.8455	0.3126	0.9753	0.6167	1.1933	1.0372	0.645	0.3121	0.89	1.0247	1.6308	1.3491	1.4876	1.3223	1.745	1.2359
2897	campesterol	Lipid	Sterol	33997	LC/MS Pos Late	100001269	2873	383.367	173183	474-62-4	C01789	HMDB02869	1.203	1.8089	1.2268	1.1151	1.0324	1.0649	0.6626	0.5494	0.7164	0.8369	0.408	0.5976	0.6861	0.8258	0.9739	1.0524	0.8981	1.3439	1.0092	0.9908	0.9421
1324	caproate (6:0)	Lipid	Medium Chain Fatty Acid	32489	LC/MS Neg	926	2713.7	115.076	8892	142-62-1	C01585	HMDB00535	0.8095	0.7522	0.9723	0.8266	1.1802	1.1911	0.7142	1.0483	1.119	0.9311	0.739	0.8109	1.1942	1.517	1.1977	0.9905	0.9648	1.0729	0.7207	1.0095	1.2071
1699	carnitine	Lipid	Carnitine Metabolism	15500	LC/MS Pos Early	100000007	1978	162.113	10917	461-05-2	C00318	HMDB00062	0.9753	0.9037	1.0547	0.7555	0.7206	1.1205	1.0667	1.0023	0.6787	0.9564	1.0311	0.5996	0.8981	1.8878	0.9977	1.2688	1.3454	1.7607	1.5887	1.5603	1.2003
235	C-glycosyltryptophan	Amino Acid	Tryptophan Metabolism	48782	LC/MS Pos Early	100006379	2700	367.15	10981970	180509-18-6			0.7954	0.9885	0.9245	0.8033	0.5967	2.1867	1.1185	0.9531	1.808	2.4688	1.8714	1.7534	1.2136	1.8239	0.8433	0.7195	1.0115	1.0595	1.2706	1.2081	0.678
3079	chenodeoxycholate	Lipid	Primary Bile Acid Metabolism	1563	LC/MS Neg	1123	5264	391.285	10133	474-24-9;474-25-9	C02528	HMDB00518	1.3666	1.1815	0.6782	1.1122	1.211	1.9366	1.8006	0.5699	0.7826	0.568	0.7057	1.0301	1.3073	2.2788	0.9699	0.8572	0.5059	0.6949	1.1098	0.7615	0.9292
3076	cholate	Lipid	Primary Bile Acid Metabolism	22842	LC/MS Neg	136	5165	407.28	221493	81-25-4	C00695	HMDB00619	0.8107	1.5651	2.1648	1.1628	1.0283	1.4925	1.4876	0.4221	0.3871	0.3485	0.2872	0.3301	0.4665	1.8799	1.3708	1.0694	0.5798	0.5509	1	0.8134	0.4758
2869	cholesterol	Lipid	Sterol	63	LC/MS Pos Late	266	2707	369.352	11025495	57-88-5	C00187	HMDB00067	1.0758	1.2244	1.1022	1.2269	1.0636	1.219	0.9743	0.8817	0.8871	0.9106	0.8337	1.0616	1.0388	1.0363	1.0264	0.9716	0.9906	1.3039	1.0094	0.8485	0.9682
1966	choline	Lipid	Phospholipid Metabolism	15506	LC/MS Pos Early	1256	1961	104.107	305	67-48-1	C00114	HMDB00097	0.7835	1.0298	1.6481	1.0763	1.1418	0.9692	1.0058	0.9499	0.6284	0.8296	1.0194	0.7214	0.4952	1.2504	1.8243	1.2761	0.9942	0.888	0.487	0.6015	0.6225
1967	phosphocholine	Lipid	Phospholipid Metabolism	34396	LC/MS Pos Early	267	700	184.073	1014	72556-74-2	C00588	HMDB01565	0.961	1.1204	1.3955	1.03	1.072	0.8153	0.6662	0.4908	0.5753	1.4645	0.7776	0.4512	0.5051	1.9267	1.7397	0.7188	1.6598	1.3105	1.3642	0.979	0.9705
4340	cinnamoylglycine	Xenobiotics	Food Component/Plant	38637	LC/MS Neg	100002253	3127	204.067	709625	16534-24-0		HMDB11621	0.9744	1.1047	0.513	0.9785	0.7065	0.513	0.5864	0.513	0.513	0.8793	1.1995	0.513	0.513	0.8435	1.4768	1.454	1.0003	1.5207	0.9741	1.0596	1.0795
1279	citrate	Energy	TCA Cycle	1564	LC/MS Neg	1124	582	191.02	311	77-92-9	C00158	HMDB00094	1.7469	1.4281	0.0983	0.3417	0.4134	2.7946	1.1025	1.0282	2.047	2.127	2.0895	2.2847	1.8084	0.2504	0.1408	0.1275	0.134	0.9718	2.1375	0.9253	1.0387
422	citrulline	Amino Acid	Urea cycle; Arginine and Proline Metabolism	2132	LC/MS Pos Early	391	1520	176.103	9750	372-75-8	C00327	HMDB00904	0.9473	1.1756	1.4427	0.9801	1.0472	1.0199	0.7471	0.554	0.678	0.5868	0.6697	0.5341	0.8819	1.4555	1.4797	1.1135	1.1593	1.3458	1.464	1.5341	0.934
509	CoA-glutathione*	Amino Acid	Glutathione Metabolism	62804	LC/MS Neg	269	1326	535.084	11953788	6477-52-7	C00920		0.4205	1.9229	1.0374	0.9194	0.7405	0.5071	0.9626	1.9827	0.5501	0.823	0.8513	0.6717	0.6445	1.4431	0.8087	3.8788	1.6667	1.6334	1.5898	2.014	2.3139
3940	CoA	Cofactors and Vitamins	Pantothenate and CoA Metabolism	46322	LC/MS Neg	270	1448	382.55	317	85-61-0;18439-24-2	C00010	HMDB01423	0.5095	1.5516	0.9425	1.0575	0.8862	0.1393	0.3118	0.5978	0.3293	0.6567	0.3952	0.2426	0.288	1.123	1.2582	2.3659	1.6602	1.5368	1.1884	1.471	1.5585
2970	corticosterone	Lipid	Corticosteroids	5983	LC/MS Neg	272	5040	345.207	5753	50-22-6	C02140	HMDB01547	0.2742	0.2742	0.2742	0.2742	0.2742	2.1599	0.8708	0.9205	1.0372	0.9628	1.7633	1.2857	1.0446	0.5105	0.2742	0.2742	0.2742	0.2742	0.2742	0.2742	0.2742
455	creatine	Amino Acid	Creatine Metabolism	27718	LC/MS Pos Early	1221	1947	132.077	586	57-00-1	C00300	HMDB00064	0.7705	0.6581	0.586	0.6511	0.6285	5.1706	7.2825	3.9638	5.4174	7.5074	4.6573	3.3529	1.1261	1.0654	1.1637	0.8512	1.079	1.0224	0.7998	0.8597	0.6331
457	creatine phosphate	Amino Acid	Creatine Metabolism	33951	LC/MS Neg	100000112	603	210.029	9548602	922-32-7	C02305	HMDB01511	0.2559	0.2559	0.2559	0.2559	0.2559	0.3274	2.5863	0.4132	1	1.4444	1.0647	0.2559	0.2559	0.2559	0.2559	0.2559	0.2559	0.2559	0.2559	0.2559	0.2559
456	creatinine	Amino Acid	Creatine Metabolism	513	LC/MS Pos Early	275	2055	114.066	588	60-27-5	C00791	HMDB00562	1.1875	1.0557	0.126	0.9541	0.9226	1.5027	1.3386	0.7676	1.1843	1.5944	1.2789	1.4776	0.8192	0.9386	1.0893	0.7937	0.998	4.2939	0.9232	0.8128	1.0348
388	cystathionine	Amino Acid	Methionine, Cysteine, SAM and Taurine Metabolism	15705	LC/MS Pos Early	310	2270	223.075	439258	535-34-2	C02291	HMDB00099	0.948	0.8577	1.8739	0.6162	0.9083	0.7453	0.6452	0.5439	0.6874	0.8091	1.052	0.4527	0.455	2.5345	3.4623	1.5136	1.5938	1.725	1.7301	1.4128	1.0784
390	cysteine	Amino Acid	Methionine, Cysteine, SAM and Taurine Metabolism	1868	LC/MS Pos Early	800	1475	122.027	5862	52-90-4;56-89-3	C00097	HMDB00574	1.1189	1.057	1.7055	0.9851	0.9311	0.9353	1.0148	0.6717	0.8959	1.0677	1.0772	0.9404	0.8416	1.1601	1.1178	0.9852	0.7192	1.1182	0.7431	0.8218	0.8422
395	cysteine s-sulfate	Amino Acid	Methionine, Cysteine, SAM and Taurine Metabolism	22176	LC/MS Neg	100000808	640.9	199.969	115015	1637-71-4	C05824	HMDB00731	0.9013	0.9223	0.6682	0.821	0.5121	1.2518	0.9841	1.0404	1.5393	1.0794	1.2419	1.558	1.3915	0.5121	0.5121	0.7536	0.5259	0.767	1.5129	1	1.3312
402	cysteine sulfinic acid	Amino Acid	Methionine, Cysteine, SAM and Taurine Metabolism	37443	LC/MS Pos Early	100002113	597	154.017	109	207121-48-0	C00606	HMDB00996	2.9623	2.9967	1.965	0.7969	0.6007	0.5436	0.717	0.5436	3.1497	1.3039	1	0.5436	0.6276	2.1272	1.4357	2.2751	1.5055	0.8983	0.8744	0.7826	0.731
492	cysteine-glutathione disulfide	Amino Acid	Glutathione Metabolism	35159	LC/MS Pos Early	100001437	2465	427.095	4247235	13081-14-6		HMDB00656	0.7986	1.3981	1.3804	1.4558	1.4223	1.3662	0.8443	0.6089	1.9642	1.776	1.0152	0.9719	1.1052	0.8163	0.8054	0.823	0.5592	0.6628	0.9848	0.7435	0.7771
495	cysteinylglycine	Amino Acid	Glutathione Metabolism	35637	LC/MS Pos Early	278	2132	179.048	439498	19246-18-5	C01419	HMDB00078	0.9914	1.0086	1.3865	1.0583	1.0765	0.0597	0.2622	0.2132	0.0738	0.1144	0.1663	0.0879	0.1438	1.788	2.1614	1.1411	1.7275	1.5879	0.7975	0.9722	0.8849
3857	cytidine	Nucleotide	Pyrimidine Metabolism, Cytidine containing	514	LC/MS Pos Early	827	2124	244.093	6175	65-46-3	C00475	HMDB00089	1.1421	1.1574	1.1634	1.2443	1.3206	1.353	0.8667	0.8314	0.8589	1.1048	0.955	1.0834	1.1399	1.1492	1.0051	0.7917	0.6951	0.8125	0.9949	0.8186	0.8799
1968	CDP-choline	Lipid	Phospholipid Metabolism	34418	LC/MS Pos Early	1220	725	489.115	13804	33818-15-4	C00307	HMDB01413	0.3082	0.4769	1.319	0.39	0.2724	1.1297	2.6476	2.247	0.2724	0.2724	1.2034	0.2724	0.2796	2.5338	2.8941	1.3576	1.9161	0.7004	0.3188	0.601	0.5165
3853	CMP	Nucleotide	Pyrimidine Metabolism, Cytidine containing	2372	LC/MS Pos Early	282	835	324.059	6131	63-37-6	C00055	HMDB00095	0.891	1.1027	1.3647	1.0006	0.9994	1.0885	0.8387	1.0061	0.6225	0.9384	0.9892	0.6858	0.812	1.4911	1.2487	1.1097	1.055	1.3002	0.9565	1.0316	1.0523
1973	CDP-ethanolamine	Lipid	Phospholipid Metabolism	34410	LC/MS Polar	100001407	4210	445.053	123727	72842-05-8	C00570	HMDB01564	1.0069	0.2663	0.6867	0.5354	0.5547	0.8962	1.1327	1.6208	1.1407	0.8693	1.6973	0.6179	0.3756	3.4521	1.1549	0.6231	1.9502	1	0.6966	1.0647	0.2663
3858	cytosine	Nucleotide	Pyrimidine Metabolism, Cytidine containing	573	LC/MS Pos Early	881	2060	112.05	597	71-30-7	C00380	HMDB00630	1.165	1.1982	1.1418	1.2861	1.3357	1.374	0.8753	0.8753	0.8496	1.1164	0.9533	1.1289	1.1161	1.1938	1.0114	0.8274	0.6637	0.8009	0.9886	0.8242	0.9499
4357	daidzein	Xenobiotics	Food Component/Plant	32453	LC/MS Neg	100001219	3566	253.051	5281708	486-66-8	C10208	HMDB03312	1.2708	0.2651	2.9097	0.2737	0.2618	2.3476	1.0582	0.1536	0.2955	0.3077	0.2755	0.4439	0.4502	2.9219	1.4278	0.5684	2.9149	3.2109	1.2171	1.4237	2.134
4587	daidzein sulfate (1)	Xenobiotics	Food Component/Plant	48727	LC/MS Neg	100006362	2843	333.007	12114465				0.8526	0.6613	2.9495	0.6613	0.6613	0.6613	0.6613	0.6613	0.6613	0.6613	0.6613	0.6613	0.6613	1.0149	1.8697	0.6613	3.8343	2.9243	0.8326	0.9052	0.9851
1698	deoxycarnitine	Lipid	Carnitine Metabolism	36747	LC/MS Pos Early	100001662	2052	146.118	134	6249-56-5	C01181	HMDB01161	1.4169	0.9905	1.1244	1.0746	1.0095	0.7314	0.6145	0.4628	0.2816	0.5401	0.3933	0.3658	0.5169	1.4228	2.0309	0.8	1.9617	1.232	0.9496	1.2549	0.9434
1393	dihomolinoleate (20:2n6)	Lipid	Long Chain Polyunsaturated Fatty Acid (n3 and n6)	17805	LC/MS Neg	1231	5730	307.264	6439848	2091-39-6	C16525	HMDB05060	1.1987	0.5868	0.9544	0.7821	1.0345	3.8549	1.6216	0.8172	1.6454	1.8455	1.1327	1.3336	2.1993	2.9443	0.7921	0.5859	0.5909	0.8283	0.73	0.9655	1.6578
1395	dihomolinolenate (20:3n3 or 3n6)	Lipid	Long Chain Polyunsaturated Fatty Acid (n3 and n6)	35718	LC/MS Neg	100001739	5596	305.249	5280581	17046-59-2	C03242	HMDB02925	1.2273	0.9972	1.1369	0.9954	1.3454	2.2109	0.8426	0.5988	0.8706	1.0014	0.8355	0.7986	1.451	2.2464	1.037	0.552	0.7768	1.039	0.7655	0.8014	1.4781
1669	dihomo-linoleoylcarnitine (C20:2)*	Lipid	Fatty Acid Metabolism (Acyl Carnitine, Polyunsaturated)	57520	LC/MS Pos Late	100015839	1436	452.373					0.4282	0.4282	0.6129	0.4282	0.4282	1.6169	0.5324	0.4282	2.5167	2.2356	1	0.9297	0.4282	0.9378	0.811	0.4282	0.6031	1.212	1.1944	1.9956	1.1289
3813	dihydroorotate	Nucleotide	Pyrimidine Metabolism, Orotate containing	601	LC/MS Polar	923	1910	157.025	648	155-54-4	C00337	HMDB03349	1.0308	0.703	1.1193	0.385	0.2879	0.6333	1.2127	0.8366	0.3048	0.214	0.6423	0.2518	0.1872	3.9711	3.0349	1.3265	1.4903	2.3921	2.2421	1.7786	0.5963
1080	dihydroxyacetone phosphate (DHAP)	Carbohydrate	Glycolysis, Gluconeogenesis, and Pyruvate Metabolism	15522	LC/MS Neg	309	603	168.991	668	102783-56-2	C00111	HMDB01473	1.4525	0.8288	0.7774	2.7399	2.6721	1.6594	0.4369	0.4369	1.649	2.3744	0.4369	0.8059	1.0207	0.4369	0.4369	0.4369	0.4369	0.4369	0.7731	0.5806	1
428	dimethylarginine (ADMA + SDMA)	Amino Acid	Urea cycle; Arginine and Proline Metabolism	36808	LC/MS Pos Early	100001810	2850	203.15	123831	102783-24-4	C03626	HMDB01539	0.9251	1.0652	1.2426	1.0116	1.1143	1.4928	1.409	0.7667	1.0774	1.0174	0.9958	1.0029	1.0102	1.1392	0.9534	0.9971	0.6132	0.666	0.7821	0.6685	0.5515
5	dimethylglycine	Amino Acid	Glycine, Serine and Threonine Metabolism	5086	LC/MS Pos Early	806	1104	104.071	673	1118-68-9	C01026	HMDB00092	0.5371	0.8717	1.1504	0.7023	0.7855	0.5464	0.856	0.6682	0.9778	1.0924	0.7899	0.3905	0.2506	1.2683	1.4216	1.3155	1.3959	1.6164	1.2383	1.5615	1.3361
1400	docosadienoate (22:2n6)	Lipid	Long Chain Polyunsaturated Fatty Acid (n3 and n6)	32415	LC/MS Neg	100001182	6034	335.296	5282807	7370-49-2	C16533	HMDB61714	0.919	0.4269	0.6583	0.4842	0.6761	3.2146	1.1302	0.6005	2.1352	2.4105	1.2341	1.081	1.4215	2.557	0.5678	0.2853	0.4849	0.5805	0.5734	0.849	1.3792
1386	docosahexaenoate (DHA; 22:6n3)	Lipid	Long Chain Polyunsaturated Fatty Acid (n3 and n6)	44675	LC/MS Neg	100000665	5525	327.233	445580	6217-54-5	C06429	HMDB02183	0.8469	0.8185	1.0125	0.8193	1.0721	2.9941	1.5727	0.9302	1.2653	0.9916	1.1505	1.0885	2.215	2.4486	0.77	0.9392	0.6479	0.8437	0.876	1.0084	1.9246
1385	docosapentaenoate (DPA; 22:5n3)	Lipid	Long Chain Polyunsaturated Fatty Acid (n3 and n6)	32504	LC/MS Neg	100001181	5571	329.249	6441454	2234-74-4	C16513	HMDB06528	0.5209	0.4307	0.6852	0.6623	0.8992	3.8646	1.3464	1.1655	1.7706	1.1963	1.1008	1.2705	2.8431	2.963	0.4935	0.7837	0.4118	0.5952	0.716	1.1857	2.2246
1399	docosapentaenoate (n6 DPA; 22:5n6)	Lipid	Long Chain Polyunsaturated Fatty Acid (n3 and n6)	37478	LC/MS Neg	100001580	5624.5	329.249	6441454	25182-74-5	C16513	HMDB01976	0.6234	0.8276	0.8055	0.7275	0.9439	3.1604	1.3524	0.8944	1.1464	1.3815	1.2188	0.977	1.9053	2.2865	0.5433	0.8877	0.5542	0.7317	0.6664	1.0901	1.8508
1387	docosatrienoate (22:3n3)	Lipid	Long Chain Polyunsaturated Fatty Acid (n3 and n6)	32417	LC/MS Neg	100001195	5823	333.28	5312556	59708-86-0	C16534	HMDB02823	1.1586	0.5038	0.6265	0.6715	0.7196	4.2134	0.797	0.6515	1.941	2.4096	1.2672	1.303	1.5796	2.4393	0.6927	0.2336	0.3315	0.6625	0.4323	0.8414	1.356
1509	dodecadienoate (12:2)*	Lipid	Fatty Acid, Dicarboxylate	62276	LC/MS Neg	100020478	5146	195.139					0.5614	1	0.8739	0.9931	3.1501	3.9896	0.7458	0.5614	0.8021	0.5614	0.5614	1.0486	4.1293	5.5954	1.0256	0.8704	0.8156	0.8191	0.8539	2.0584	5.1635
2846	eicosanoylsphingosine (d20:1)*	Lipid	Sphingosines	57597	LC/MS Pos Late	100015870	1443	328.321					0.5645	1.1664	1.165	0.5645	0.9551	1.2404	1.2351	1.1699	1	0.9353	1.3367	1.3904	1.2164	1.1169	0.8844	0.9276	0.8172	0.7004	0.9313	1.0712	0.8933
1383	eicosapentaenoate (EPA; 20:5n3)	Lipid	Long Chain Polyunsaturated Fatty Acid (n3 and n6)	18467	LC/MS Neg	2050	5450	301.217	446284	10-2005-9;10417-94-4	C06428	HMDB01999	1.436	0.6317	1.011	1.0944	1.0185	3.192	1.2857	0.9109	1.3325	0.643	1.0328	0.8828	2.8335	2.9719	0.8092	0.989	0.5804	0.547	0.6202	0.8245	1.899
1366	eicosenoate (20:1n9 or 1n11)	Lipid	Long Chain Monounsaturated Fatty Acid	33587	LC/MS Neg	100001335	5950	309.28	5282768		C16526	HMDB02231	1.009	0.7619	0.8852	0.8871	1.0029	3.9945	1.3777	0.8783	1.898	2.0334	1.1703	1.3074	2.0166	2.8664	0.8312	0.643	0.6138	0.7055	0.6477	0.9971	1.774
1663	eicosenoylcarnitine (C20:1)*	Lipid	Fatty Acid Metabolism (Acyl Carnitine, Monounsaturated)	57519	LC/MS Pos Late	100015838	1484	454.389					0.3138	0.5933	0.598	0.7785	0.5647	2.1209	1.1151	0.7764	1.9555	2.3381	1.143	0.9453	0.9227	1.2885	1.0547	1.2863	0.6564	1.3644	2.1074	1.9761	1.5482
4372	equol	Xenobiotics	Food Component/Plant	36774	LC/MS Neg	100001725	4565	241.087	91469	531-95-3;94105-90-5	C14131	HMDB02209	1.6996	0.9438	0.41	1.1198	1.0984	0.3163	1.0562	0.3163	0.3163	0.3163	0.3163	0.3163	0.3163	0.8242	1.3126	0.3163	0.3163	0.3163	0.5697	0.3163	0.6088
4374	equol sulfate	Xenobiotics	Food Component/Plant	40478	LC/MS Neg	100003429	3630	321.044					4.0511	3.2371	1.4557	2.5967	2.4982	0.1095	0.9331	0.2603	0.4631	0.8667	0.2901	0.2421	0.1995	0.9608	4.7254	1.3189	0.622	1.0392	1.7587	1.3912	1.0541
4375	ergothioneine	Xenobiotics	Food Component/Plant	37459	LC/MS Pos Early	100002154	850	230.096	3032311	58511-63-0	C05570	HMDB03045	0.9277	1.3235	1.3956	0.9975	1.0025	0.839	0.846	0.7884	0.4506	0.8429	0.636	0.4761	0.6388	1.5581	1.4063	1.4502	1.4662	1.043	0.844	1.2572	0.9439
1370	erucate (22:1n9)	Lipid	Long Chain Monounsaturated Fatty Acid	1552	LC/MS Neg	1087	6355.6	337.311	5281116	112-86-7	C08316	HMDB02068	0.8395	0.6894	0.8045	0.7004	0.7616	2.9733	1.1997	0.7824	1.703	2.4058	1.0159	1.1395	1.3844	2.2597	0.7211	0.5388	0.7195	0.5775	0.5659	0.9841	1.5766
4377	erythritol	Xenobiotics	Food Component/Plant	20699	LC/MS Polar	100000846	1491	167.056	222285	149-32-6	C00503	HMDB02994	2.3124	0.2634	0.2634	0.2634	0.693	1.4173	0.805	0.2634	1.2471	1.2589	1	2.7911	1.6671	0.4508	0.2634	0.2634	0.2634	0.6794	0.2634	0.2634	0.2634
1271	erythronate*	Carbohydrate	Aminosugar Metabolism	42420	LC/MS Polar	100001320	2186	135.03	2781043	88759-55-1		HMDB00613	1.2634	1.1563	0.9996	1.0326	0.9387	0.9813	0.6731	0.5729	1.0275	1.1861	0.7976	0.7363	0.7442	1.0004	1.1994	0.9813	1.5033	1.5648	0.8268	0.719	0.7135
346	ethylmalonate	Amino Acid	Leucine, Isoleucine and Valine Metabolism	15765	LC/MS Polar	2054	2785	131.035	11756	601-75-2		HMDB00622	0.7105	0.9094	1.6343	1.2002	1.3725	0.5783	0.6789	1	1.2594	1.1111	0.7969	0.5783	0.7499	1.0438	1.1111	1.0242	0.7742	1.6536	0.8119	0.9995	0.6268
3931	FAD	Cofactors and Vitamins	Riboflavin Metabolism	2134	LC/MS Neg	327	2425	784.15	643975	146-14-5;84366-81-4	C00016	HMDB01248	0.8586	1.0228	1.0756	0.9016	0.9077	1.1718	1.07	1.2102	1.0617	0.993	1.1576	1.1964	1.1699	1.0491	0.8962	0.9929	0.841	0.996	0.9663	1.0126	1.004
3932	FMN	Cofactors and Vitamins	Riboflavin Metabolism	15797	LC/MS Neg	100000251	2390	455.097	710	130-40-5	C00061	HMDB01520	0.9221	0.927	1.0092	0.9956	1.2527	1.6193	0.8713	1.0458	0.9018	0.7941	1.15	1.5793	2.3726	1.1592	0.881	0.9927	0.8493	1.0044	1.0193	1.1886	1.5317
3981	folate	Cofactors and Vitamins	Folate Metabolism	1826	LC/MS Neg	328	1467	440.132	6037	59-30-3	C00504	HMDB00121	0.8452	1.1742	1.8807	0.7873	0.4287	1.4805	0.9008	1	1.4096	1.3945	1.2718	1.9834	1.8981	0.958	0.4287	0.8634	0.9654	0.9919	1.4523	1.1135	1.3562
76	formiminoglutamate	Amino Acid	Histidine Metabolism	43493	LC/MS Pos Early	100002500	1880	175.071	439233	816-90-0	C00439	HMDB00854	1.1248	1.3931	0.9081	0.5977	1.0433	1.1047	1.2957	0.2871	3.184	0.9827	0.6706	1.3215	2.5656	0.2871	0.3775	1	0.8473	0.2871	0.8901	0.6997	0.918
1189	fructose	Carbohydrate	Fructose, Mannose and Galactose Metabolism	577	LC/MS Polar	878	2065	179.056	5984	57-48-7	C00095	HMDB00660	1.277	2.255	1.3977	1.8627	1.7333	0.4207	0.1488	0.0687	0.7811	0.9803	0.3124	0.5472	0.2214	0.934	1.0197	0.554	1.2781	1.0733	1.193	0.8008	0.892
1078	Isobar: hexose diphosphates	Carbohydrate	Glycolysis, Gluconeogenesis, and Pyruvate Metabolism	46896	LC/MS Neg	100002180	551	338.989			C00354		0.4636	0.4636	0.9352	0.7611	0.9901	1.7811	0.954	3.2004	0.4636	0.4636	1.6285	0.4636	0.4636	2.483	0.8712	3.6198	1.0502	0.4636	0.4636	1.3802	0.8173
112	fructosyllysine	Amino Acid	Lysine Metabolism	46227	LC/MS Pos Early	100005373	2784	309.166	123708	21291-40-7			1.0003	2.1409	2.4419	1.2436	1.3306	0.6152	0.2041	0.1558	0.9765	1.2784	0.5221	0.5136	0.2242	0.9997	1.1311	1.3698	1.0739	0.89	0.7976	0.9685	0.9283
1289	fumarate	Energy	TCA Cycle	1643	LC/MS Polar	330	3084	115.004	444972	100-17-8	C00122	HMDB00134	1.5597	1.4006	1.2585	1.1004	1.1657	1.3138	1.1429	0.9614	0.5209	0.921	1.3228	0.6073	0.8429	0.8749	0.7305	0.7166	1.0386	1.208	0.821	0.8659	0.8763
1215	galactonate	Carbohydrate	Fructose, Mannose and Galactose Metabolism	27719	LC/MS Polar	100001026	3085	195.051	128869	299-28-5	C00880	HMDB00565	1.2373	0.6979	1.1167	1.2421	1.2145	0.2954	0.7683	0.4952	0.4481	0.4003	0.5664	0.2594	0.1557	1.7719	1.3587	1.35	1.3964	1.291	0.8279	0.8833	0.8126
1206	galactose 1-phosphate	Carbohydrate	Fructose, Mannose and Galactose Metabolism	15706	LC/MS Polar	100000300	4552	259.022	123912	19046-60-7	C00446	HMDB00645	1	2.3729	0.7899	1.5159	1.447	0.4548	0.3016	0.1994	0.1994	1.2718	0.288	0.3686	0.4658	1.0522	0.9176	0.8402	1.1036	1.8006	2.2968	1.8562	1.9858
548	gamma-glutamylcysteine	Peptide	Gamma-glutamyl Amino Acid	1778	LC/MS Pos Early	1036	2118	251.07	842	636-58-8	C00669	HMDB01049	0.9868	1.1105	1.6127	1.0158	1.0065	0.203	0.4313	0.3379	0.1817	0.3518	0.2975	0.1996	0.3109	1.2796	1.3053	1.1028	1.2562	1.2314	0.7341	0.9935	0.9525
556	gamma-glutamyl-epsilon-lysine	Peptide	Gamma-glutamyl Amino Acid	33934	LC/MS Pos Early	100001262	2725	276.155	7015685	17105-15-6		HMDB03869	0.6221	0.6643	0.5469	0.5465	0.6227	3.7373	2.6383	2.3876	4.5951	3.3834	1.7454	1.448	2.3386	4.5631	0.6265	1.2012	0.7025	0.8814	1.0176	1.0593	0.9824
549	gamma-glutamylglutamate	Peptide	Gamma-glutamyl Amino Acid	36738	LC/MS Pos Early	331	1775	277.103	92865	1116-22-9	C05282	HMDB11737	0.5874	1.9384	1.5173	1.2906	1.2745	0.9843	0.8073	0.8265	0.6534	0.7306	0.6761	0.698	0.6575	1.2444	1.1035	1.5079	1.1029	0.8181	1.1199	0.8868	1.0157
551	gamma-glutamylglycine	Peptide	Gamma-glutamyl Amino Acid	33949	LC/MS Pos Early	100001294	1535	205.082	165527	1948-29-4		HMDB11667	0.5638	1.1076	1.6097	0.752	0.7418	1.0701	1.1397	0.9038	0.791	1.6325	0.9966	1.007	0.323	1.7961	1.0034	1.8472	0.9211	0.9659	0.8223	0.4525	0.6875
553	gamma-glutamylisoleucine*	Peptide	Gamma-glutamyl Amino Acid	34456	LC/MS Pos Early	100001485	2940	261.144	14253342			HMDB11170	0.6709	1.043	0.957	0.4322	0.7847	0.4322	0.4322	0.4322	0.4322	0.4322	0.4322	0.4322	0.4322	1.1747	1.1485	1.2155	1.0804	0.7481	0.4322	0.8628	0.4322
554	gamma-glutamylleucine	Peptide	Gamma-glutamyl Amino Acid	18369	LC/MS Pos Early	1268	2991	261.144	151023	2566-39-4		HMDB11171	1.0018	0.9534	1.7039	0.9982	0.8616	0.8793	0.8834	0.9114	0.4274	0.7634	0.4023	0.4042	0.5104	2.3337	1.5957	1.3826	1.6009	1.4187	1.0332	0.9955	1.0433
559	gamma-glutamylthreonine	Peptide	Gamma-glutamyl Amino Acid	33364	LC/MS Pos Early	100001314	1750	249.108	76078708	5652-48-2		HMDB29159	0.7101	1.562	0.8527	0.869	0.9231	1.5462	0.8804	1.2421	1.8154	2.0627	1.8347	1.1397	0.8902	1.5062	1.0722	0.9972	0.8849	0.6335	0.9357	0.5558	0.3476
562	gamma-glutamylvaline	Peptide	Gamma-glutamyl Amino Acid	43829	LC/MS Pos Early	100001126	2700	247.129	7015683	2746-34-1		HMDB11172	1	1.0796	1.4676	0.9306	0.7949	0.4439	0.8787	0.3809	0.3078	2.5864	0.3078	0.3078	0.3078	2.1808	0.8933	1.332	1.3786	1.0636	0.4056	0.5866	0.7451
4217	genistein	Xenobiotics	Food Component/Plant	32448	LC/MS Neg	100001221	3754	269.046	5280961	446-72-0	C06563	HMDB03217	2.4841	0.5344	1.3604	0.3307	0.4437	5.6514	3.8986	0.2242	0.3136	0.5921	0.2838	0.7209	0.994	5.0627	1.9363	0.8811	2.4113	1.3679	1.6054	0.5996	4.2657
4360	genistein sulfate*	Xenobiotics	Food Component/Plant	62061	LC/MS Neg	100020207	3616	349.002					1.2923	0.4074	0.9256	0.4074	0.4074	0.4074	1.0861	0.4074	0.4074	0.4074	0.4074	0.4074	0.4074	1.8034	2.0646	0.5748	2.8938	1	0.7905	0.557	1.5464
4293	gluconate	Xenobiotics	Food Component/Plant	587	LC/MS Polar	338	2922	195.051	10690	527-07-1	C00257	HMDB00625	1.1317	1.509	1.2224	1.2614	1.2028	1.1484	0.3927	0.3447	0.6216	0.5706	0.54	0.4906	1.2588	1.1414	1.0932	0.7248	0.7743	0.8344	0.9068	0.6401	0.6641
1243	glucosamine-6-phosphate	Carbohydrate	Aminosugar Metabolism	580	LC/MS Polar	290	4521.5	258.038	439217	3616-42-0	C00352	HMDB01254	0.8093	2.123	0.7317	1.6148	1.6273	0.0485	0.0101	0.0172	0.9727	1.231	0.0385	0.0209	0.0208	0.8134	1.1639	0.3401	1.4929	1.9957	2.9377	1.664	1.9596
1071	glucose	Carbohydrate	Glycolysis, Gluconeogenesis, and Pyruvate Metabolism	20488	LC/MS Polar	572	2342	179.056	5793	50-99-7	C00031	HMDB00122	0.9684	1.7281	1.4081	1.4375	1.4153	0.4791	0.1335	0.1173	0.6781	0.8174	0.2994	0.2775	0.1814	0.9978	1.2531	0.8392	1.1482	1.0605	1.1225	0.927	1.0022
1072	glucose 6-phosphate	Carbohydrate	Glycolysis, Gluconeogenesis, and Pyruvate Metabolism	31260	LC/MS Polar	291	4537	259.022	5958	103192-55-8	C00668	HMDB01401	0.726	2.5741	0.738	1.6699	1.7243	0.0623	0.0156	0.02	0.9775	1.1851	0.051	0.0179	0.0149	1.0108	1.1606	0.4205	1.4314	1.9084	2.98	1.8315	2.2809
1247	glucuronate	Carbohydrate	Aminosugar Metabolism	15443	LC/MS Polar	100000257	3233.3	193.035	444791	207300-70-7	C00191	HMDB00127	1.3317	1.5862	1.3005	1.1973	1.1684	0.6269	0.4266	0.6237	0.7578	0.9585	0.8116	0.3818	0.4822	0.87	0.6881	1.0312	1.3618	1.3724	0.6044	1.2075	0.9688
42	glutamate	Amino Acid	Glutamate Metabolism	57	LC/MS Pos Early	561	1500	148.06	611	56-86-0	C00025	HMDB00148	1.0561	1.1158	1.1438	0.992	1.0014	1.344	1.1779	0.8563	1.0327	1.0012	1.1004	0.9427	0.9279	1.0609	0.9988	0.8925	0.6149	0.8208	0.7991	0.7243	0.7024
51	glutamate, gamma-methyl ester	Amino Acid	Glutamate Metabolism	33487	LC/MS Pos Early	100001103	2170	162.076	68662	1499-55-4;1499-55-4		HMDB61715	0.401	0.9174	2.1673	1.2354	1.2455	0.8397	0.5934	0.9608	0.5569	0.7243	0.8233	0.6225	0.8461	2.1569	2.0473	1.4806	2.0971	1.8541	0.8507	1.0967	0.9752
43	glutamine	Amino Acid	Glutamate Metabolism	53	LC/MS Pos Early	563	1291	147.076	5961	56-85-9	C00064	HMDB00641	1.0512	1.0934	1.592	0.8493	0.9034	1.0252	1.1227	0.6175	1.0484	1.0577	1.0012	0.9042	0.7965	1.0463	1.1053	0.9953	0.7343	0.903	0.7546	0.8125	0.6561
1479	glutarate (C5-DC)	Lipid	Fatty Acid, Dicarboxylate	396	LC/MS Polar	339	2900	131.035	743	110-94-1	C00489	HMDB00661	0.5105	0.9574	1.6244	0.829	0.7737	0.7302	0.8293	0.7953	1.7372	0.7719	1.4767	0.6259	0.4528	3.4238	2.708	1.3185	2.1771	1.1842	1.8226	0.9629	0.4528
118	glutaroylcarnitine (C5)	Amino Acid	Lysine Metabolism	44664	LC/MS Pos Early	100001593	2393	276.144	71464488	102636-82-8		HMDB13130	1.0319	1.1719	1.5651	0.9943	1.0057	0.3338	0.6074	0.4998	0.1913	0.3929	0.4338	0.2678	0.3824	1.4509	1.4125	1.3071	1.4279	1.5145	0.8812	0.9026	0.8769
489	glutathione, oxidized (GSSG)	Amino Acid	Glutathione Metabolism	27727	LC/MS Pos Early	448	2667	613.159	65359	103239-24-3	C00127	HMDB03337	0.8058	1.1131	1.2785	0.9833	1.072	0.8759	0.9001	0.8897	0.2854	0.3107	0.6623	0.2996	0.4935	1.7351	1.0167	1.2819	1.0967	1.2784	1.2117	1.2371	1.2016
488	glutathione, reduced (GSH)	Amino Acid	Glutathione Metabolism	2127	LC/MS Pos Early	496	2000	308.091	124886	70-18-8	C00051	HMDB00125	0.994	0.8947	1.8066	1.0121	1.006	0.0961	0.1795	0.234	0.0502	0.0795	0.1219	0.0363	0.0823	2.2604	2.3672	1.0192	1.7684	1.5162	0.7079	1.0074	0.9134
1091	glycerate	Carbohydrate	Glycolysis, Gluconeogenesis, and Pyruvate Metabolism	1572	LC/MS Polar	1052	2070.4	105.019	752	600-19-1	C00258	HMDB00139	0.8628	1.0873	0.9991	1.0009	1.0022	0.9315	0.8734	0.8337	0.7013	0.7329	0.8147	0.5687	3.1247	1.515	1.2161	1.0426	1.2601	1.4803	0.7856	0.8107	0.8975
2532	glycerol	Lipid	Glycerolipid Metabolism	15122	LC/MS Neg	1254	758	91.0401	753	56-81-5	C00116	HMDB00131	0.4198	0.8898	0.8635	1.6607	0.7638	1.9499	0.9624	0.9274	1.1484	0.6491	1.2391	1.2038	1.1518	0.5885	1.4191	1.0481	0.492	0.6074	1.0376	1.0548	1.4672
2533	glycerol 3-phosphate	Lipid	Glycerolipid Metabolism	43847	LC/MS Pos Early	100000258	580	173.021	754	29849-82-9	C00093	HMDB00126	0.7667	0.7895	1.5052	0.835	0.8496	1.0313	1.071	1.1328	0.6044	1.1231	2.1697	0.6889	0.6885	1.0095	2.5525	1.4049	1.227	1.0552	0.6665	0.9905	0.941
1974	glycerophosphoethanolamine	Lipid	Phospholipid Metabolism	37455	LC/MS Polar	100001620	3075	214.049	123874	33049-08-0	C01233	HMDB00114	1.3652	0.7989	1.0434	1.0115	0.9739	1.5252	1.294	0.9772	0.9012	0.8755	1.0269	1.0838	1.2865	0.9885	0.7379	0.7484	0.6192	0.8846	0.8071	1.0393	0.6804
2538	glycerophosphoglycerol	Lipid	Glycerolipid Metabolism	48857	LC/MS Polar	100001619	2430	245.043	439964		C03274		0.8429	1.5507	1.8171	0.9298	0.9247	0.6908	0.6823	0.3942	0.4485	0.5821	0.4662	0.4109	0.5664	1.0923	1.477	1.1498	1.6261	1.526	1.0702	1.1178	0.7725
1976	glycerophosphoinositol*	Lipid	Phospholipid Metabolism	47155	LC/MS Polar	100001621	3850	333.059	167572	16824-65-0			1.4459	1.5338	1.2335	1.3814	1.4601	1.0325	1.1316	0.9675	0.8081	0.846	0.785	0.9502	1.1395	0.8945	1.1822	0.9559	0.8092	0.9021	0.8043	0.8922	0.8607
1970	glycerophosphorylcholine (GPC)	Lipid	Phospholipid Metabolism	15990	LC/MS Pos Early	100000269	672	258.11	71920	28319-77-9	C00670	HMDB00086	1.2481	1.3158	1.0207	1.2537	1.2903	1.122	0.7911	0.8617	0.9676	0.8664	0.8554	1.0826	1.0526	0.9415	0.8276	0.8407	0.8154	0.9859	1.0484	0.9829	0.9272
1975	glycerophosphoserine*	Lipid	Phospholipid Metabolism	57404	LC/MS Pos Early	100015666	577	260.053	3081457				0.9678	1.1519	1.073	1.2086	1.3085	1.2159	1.1335	0.9619	0.7949	0.8466	0.9831	1.1216	1.0299	1.0908	1.0908	0.8786	0.8976	1.0169	1.0313	0.8863	0.8306
1	glycine	Amino Acid	Glycine, Serine and Threonine Metabolism	58	LC/MS Pos Early	340	1375	76.0393	750	56-40-6	C00037	HMDB00123	0.9864	1.0136	1.6563	1.0117	1.0577	1.0437	0.9949	0.7407	0.7652	0.8416	0.834	0.5829	0.7386	1.2628	1.3485	1.1387	0.9358	1.0051	0.7148	0.8448	0.7697
3084	glycochenodeoxycholate	Lipid	Primary Bile Acid Metabolism	32346	LC/MS Neg	1628	5236.1	448.307	12544	16564-43-5	C05466	HMDB00637	1.1888	1.1243	0.5683	0.7526	0.8234	1.5502	1.2831	0.7317	1.6897	1.6352	1.3585	2.2114	2.3322	0.8949	0.7459	0.6379	0.5683	1	0.9146	0.7328	1.1083
3077	glycocholate	Lipid	Primary Bile Acid Metabolism	18476	LC/MS Neg	342	5163	464.302	10140	475-31-0;863-57-0	C01921	HMDB00138	1.3125	1.3632	0.6224	0.7809	0.7665	0.9604	1.3874	0.4167	0.8192	1.3383	1.1954	1.8153	1.458	1.3402	1.0396	0.8029	0.6297	1.074	0.8616	0.7566	0.8296
727	glycylisoleucine	Peptide	Dipeptide	36659	LC/MS Pos Early	100001790	3002	189.123	88079	19461-38-2		HMDB28844	0.7329	1.4161	0.9781	0.8346	0.76	1.2619	1.6995	0.8986	1.7292	1.1506	1.0219	1.2005	1.0252	1.088	0.3842	1.2563	0.6288	0.7783	1.1923	0.901	0.7999
728	glycylleucine	Peptide	Dipeptide	34398	LC/MS Pos Early	100001258	3059	189.123	92843	869-19-2	C02155	HMDB00759	0.7112	1.2242	0.6908	0.8609	0.7516	1.1076	1.6341	0.8893	1.6923	1.3805	1.1855	1.3818	1.1638	1.094	0.4131	1.0588	0.7669	0.8532	1.1946	0.9412	0.8175
738	glycylvaline	Peptide	Dipeptide	18357	LC/MS Pos Early	100000487	2734	175.108	97417	1963-21-9		HMDB28854	0.9086	1.6595	1.3176	1.0659	1.0716	1.2229	1.4115	0.9217	1.1686	0.8477	0.9207	0.9432	0.9708	1.5564	0.7509	1.3759	0.9162	0.9364	1.3907	1.0292	0.9467
454	guanidinoacetate	Amino Acid	Creatine Metabolism	43802	LC/MS Pos Early	344	1937	118.061	763	352-97-6	C00581	HMDB00128	1	0.6476	1.3166	0.9665	1.046	1.2989	0.4446	0.4446	1.3657	1.7105	0.9083	0.6332	0.4446	2.9958	6.9657	0.665	1.622	2.9006	0.872	0.9482	1.2772
486	guanidinosuccinate	Amino Acid	Guanidino and Acetamido Metabolism	32446	LC/MS Polar	100001212	3550	174.052	97856	6133-30-8	C03139	HMDB03157	1.0117	1.6175	0.7752	1	0.9884	0.3023	0.3023	0.9062	1.5174	8.6155	4.0225	0.3023	0.3023	0.5289	1.3792	0.3415	0.8725	0.6141	0.3023	0.3023	0.4473
3793	guanine	Nucleotide	Purine Metabolism, Guanine containing	32352	LC/MS Pos Early	172	2032	152.057	764	73-40-5	C00242	HMDB00132	1.1094	1.1156	0.7756	2.0117	2.8971	1.8098	0.625	0.7906	1.4358	1.8508	1.1808	3.9779	3.804	0.5932	0.6634	0.8038	0.4954	0.6962	1.3648	0.8906	2.3153
3792	guanosine	Nucleotide	Purine Metabolism, Guanine containing	1573	LC/MS Neg	1099	1662	282.084	6802	118-00-3	C00387	HMDB00133	0.7128	1.0329	1.3271	1.1064	1.4015	1.038	0.8975	0.8752	0.7304	0.9214	0.7297	1.1046	1.1478	0.9071	1.1125	1.0985	1.0199	0.9801	1.1632	0.8389	0.9649
3787	5'- GMP	Nucleotide	Purine Metabolism, Guanine containing	2849	LC/MS Pos Early	347	800	364.065	6804	5550-12-09	C00144	HMDB01397	0.5691	1.0188	1.5747	0.8346	0.8121	0.8927	0.8596	1.0946	0.5745	0.7001	0.8035	0.4362	0.5598	1.5539	1.4161	1.3708	1.518	1.162	0.9812	1.2643	1.0856
3953	gulonate*	Cofactors and Vitamins	Ascorbate and Aldarate Metabolism	46957	LC/MS Polar	100001586	2750	195.051	152304	20246-53-1	C00257	HMDB03290	1.3557	0.8952	1.2198	1.0943	1.0095	0.2155	0.2694	0.2081	0.2114	0.2671	0.3093	0.1159	0.1345	1.0727	0.9905	1.0128	1.4761	1.4702	0.4241	1.0845	0.7294
3999	heme	Cofactors and Vitamins	Hemoglobin and Porphyrin Metabolism	41754	LC/MS Pos Late	100001386	1124	616.176	26945	14875-96-8	C00032	HMDB03178	1.333	1.1315	1.38	1.1361	0.9921	1.1535	1.0446	0.6227	0.9869	1.2183	1.0079	0.9426	0.9217	1.0355	0.9198	0.5961	0.7181	1.0558	0.6442	0.8462	0.9702
1384	heneicosapentaenoate (21:5n3)	Lipid	Long Chain Polyunsaturated Fatty Acid (n3 and n6)	57658	LC/MS Neg	100015797	5514	315.233	11998573	24257-10-1			0.8183	0.7411	0.9455	0.9536	1.1786	3.9851	0.7585	1.0022	1.5951	0.9582	1.2055	1.1019	2.2323	2.76	0.6455	1.0639	0.4679	0.6447	0.9978	1.5139	2.8139
5271	HEPES	Xenobiotics	Chemical	21248	LC/MS Pos Early	100000843	1627	239.106	23831	7365-45-9			0.628	0.5916	1.083	1.0844	1.1143	0.6554	1.1036	1.1022	1.0463	0.9171	0.7894	0.7187	0.5667	1.6776	1.2317	0.8951	1.1599	0.7527	0.959	1.041	1.0926
2845	heptadecasphingosine (d17:1)	Lipid	Sphingosines	57427	LC/MS Pos Late	100015724	1377	286.274	5283557	6918-48-5			0.7514	1.497	1.0534	0.9732	0.9214	1.0964	1.4316	0.7366	1.5138	1.5656	1.2109	1.4268	0.9454	0.8447	0.6786	0.8983	0.8245	0.8099	1.0318	1.0268	0.8576
1325	heptanoate (7:0)	Lipid	Medium Chain Fatty Acid	1644	LC/MS Neg	925	3670	129.092	8094	111-14-8	C17714	HMDB00666	0.4845	0.9165	0.6016	1.0835	11.3437	7.7716	0.4944	0.1865	0.1865	0.7628	0.1865	2.5396	12.2367	12.641	1.4906	0.1865	0.1865	0.5053	0.8269	4.5446	20.2056
1389	hexadecadienoate (16:2n6)	Lipid	Long Chain Polyunsaturated Fatty Acid (n3 and n6)	57652	LC/MS Neg	100009394	5398	251.202		28290-73-5		HMDB00477	0.568	0.6109	0.8844	0.8463	0.6312	3.6346	1.1236	1.3181	3.4831	1.6371	2.3917	1.3802	2.6083	2.78	0.6422	0.9257	0.4789	0.7017	0.694	1.0743	1.762
1515	hexadecanedioate (C16)	Lipid	Fatty Acid, Dicarboxylate	35678	LC/MS Neg	100001614	4615	285.207	10459	505-54-4	C19615	HMDB00672	0.746	1.042	1.2631	0.8502	0.8394	1.6153	1.4903	1.0647	1.7405	1.2657	1.1083	0.8014	0.6988	0.6515	1.1296	0.7808	0.8728	0.8713	0.8941	1.0688	0.958
1374	hexadecatrienoate (16:3n3)	Lipid	Long Chain Polyunsaturated Fatty Acid (n3 and n6)	57651	LC/MS Neg	100009393	5330	249.186	5312428	7561-64-0			0.7262	0.6136	0.928	0.8897	0.7536	2.5992	0.9156	1.8703	4.1789	1.4765	3.1791	1.17	2.02	1.7167	0.7519	1.072	0.416	0.7048	0.7315	1.5865	1.3783
1516	hexadecenedioate (C16:1-DC)*	Lipid	Fatty Acid, Dicarboxylate	61862	LC/MS Neg	100019975	4380	283.192					0.6964	0.8976	1.1024	0.6749	0.6217	2.2295	1.6063	1.311	4.5712	2.6894	1.2026	1.2495	0.6674	0.4807	1.2224	0.6526	0.6327	0.5509	0.5828	1.1683	0.8945
1609	hexanoylglycine (C6)	Lipid	Fatty Acid Metabolism (Acyl Glycine)	35436	LC/MS Neg	100001527	2900	172.098	99463	24003-67-6		HMDB00701	0.4095	0.921	1.251	0.8084	0.7708	1.2142	0.6155	1.5467	1.7317	2.2134	1.9006	0.8262	0.6865	0.7842	0.6036	1.4724	1.0484	1.1967	1.5639	3.0527	2.114
4042	hippurate	Xenobiotics	Benzoate Metabolism	15753	LC/MS Neg	100000014	2106.9	178.051	464	495-69-2	C01586	HMDB00714	1.4707	1.5593	0.4316	1.0847	1.0599	1.0077	0.8218	0.6341	0.6003	0.9401	0.8196	0.864	0.7491	1.1551	1.306	0.9923	1.0803	2.2865	0.9664	0.7524	0.8473
66	histidine	Amino Acid	Histidine Metabolism	59	LC/MS Pos Early	355	2707	156.077	6274	5934-29-2	C00135	HMDB00177	0.9723	1.1642	1.4236	0.9448	0.9793	1.2419	1.0099	0.7893	1.0661	1.0465	1.161	0.9228	0.8821	1.1345	1.0387	1.0717	0.6682	0.7864	0.7396	0.7799	0.7269
4411	histidine betaine (hercynine)*	Xenobiotics	Food Component/Plant	62278	LC/MS Pos Early	100004059	2094	198.124	3083620	534-30-5			0.6301	1.0545	0.9934	0.724	0.8385	1.4872	1.2305	1.1159	0.7406	1.1831	1.0066	1.3585	1.2613	0.8222	0.8499	1.6695	1.1702	0.9537	0.8159	1.3689	1.0986
424	homocitrulline	Amino Acid	Urea cycle; Arginine and Proline Metabolism	22138	LC/MS Polar	100000963	3006.8	188.104	65072	1190-49-4	C02427	HMDB00679	1.3196	0.9495	0.9105	0.7937	0.8008	0.5359	0.7284	0.5359	0.5359	1.805	0.6496	0.5359	0.5359	1.4206	1.4362	1.0505	1.6258	1.9844	0.7108	0.884	0.7299
385	homocysteine	Amino Acid	Methionine, Cysteine, SAM and Taurine Metabolism	15128	LC/MS Pos Early	311	2155	136.043	778	454-29-5	C00155	HMDB00742	0.8016	0.9006	1.1053	1.3812	0.9192	0.8741	0.8051	1.2499	0.6421	1.6986	1.6601	1.2909	1.3051	1.1916	0.8888	1.223	0.8583	0.6498	0.5427	1.3795	1.7108
4414	homostachydrine*	Xenobiotics	Food Component/Plant	33009	LC/MS Pos Early	100001550	1750	158.118	441447	1195-94-4	C08283	HMDB33433	1.5554	1.2758	1.6932	0.8279	0.8345	0.5951	0.9026	0.2542	0.978	1.1374	1.3236	0.4313	0.3589	0.7143	1.022	0.5944	1.5242	1.3972	1.3314	0.6816	0.7933
404	hypotaurine	Amino Acid	Methionine, Cysteine, SAM and Taurine Metabolism	590	LC/MS Polar	358	2763.4	108.013	107812	300-84-5	C00519	HMDB00965	2.6529	0.9853	1.9584	1.0246	1.0467	0.2989	0.4097	0.2322	0.3701	0.4015	0.3321	0.1054	0.2422	3.2214	2.9456	1.0704	2.3739	1.2991	0.8526	1.0147	1.2374
3733	hypoxanthine	Nucleotide	Purine Metabolism, (Hypo)Xanthine/Inosine containing	3127	LC/MS Neg	171	1291.2	135.031	790	68-94-0	C00262	HMDB00157	1.557	1.3799	0.7897	1.7251	1.7984	1.6753	0.5656	0.7677	1.0002	1.2317	0.9873	1.7462	2.268	0.8026	0.5506	1.0062	0.3421	0.9085	0.9998	0.7434	1.0964
77	imidazole lactate	Amino Acid	Histidine Metabolism	15716	LC/MS Pos Early	100000263	2040	157.061	440129	14403-45-3	C05568	HMDB02320	0.9004	1.0025	1.0958	0.681	0.7601	0.7718	0.9975	0.6808	2.5406	8.3378	1.3001	0.3733	0.4249	1.1152	1.1359	0.971	1.3651	1.3432	0.7075	0.9675	0.7118
75	imidazole propionate	Amino Acid	Histidine Metabolism	40730	LC/MS Pos Early	100003434	2263	141.066	70630	1074-59-5		HMDB02271	1.2933	0.5075	0.2902	1.1274	1.154	0.4143	0.8273	0.8212	1.0874	0.9552	1.223	0.4022	0.4817	0.6129	0.8875	0.3892	1.3842	1.4316	1.0448	0.7218	1.2632
274	indole-3-carboxylate	Amino Acid	Tryptophan Metabolism	38116	LC/MS Neg	100002185	1710	160.04	69867	771-50-6	C19837	HMDB03320	0.8093	1.0041	1.0794	0.8772	1.2058	0.7464	0.7464	0.7959	0.7464	0.7506	0.7464	0.7464	1.0556	1.8191	1.4096	1.0097	0.7965	0.9959	1.0974	0.9561	0.7972
276	indoleacetylglycine	Amino Acid	Tryptophan Metabolism	54730	LC/MS Pos Early	100006730	2400	233.092	446640				1.0056	0.727	1.3215	0.6918	0.7069	1.2826	0.5139	0.5139	0.5139	0.5347	0.5139	0.5139	0.5139	1.0701	2.141	0.9152	1.7524	0.9944	0.8345	0.5139	0.5415
265	indolelactate	Amino Acid	Tryptophan Metabolism	18349	LC/MS Neg	100000463	2286	204.067	92904	832-97-3	C02043	HMDB00671	1.1496	1.2158	0.7244	0.9951	0.8712	0.9303	0.7244	0.7325	1.0049	1.8005	1.26	0.7244	0.7776	0.8998	0.7244	0.7244	1.2288	1.2145	0.7244	0.7244	0.9527
3732	inosine	Nucleotide	Purine Metabolism, (Hypo)Xanthine/Inosine containing	1123	LC/MS Neg	361	1602.1	267.074	6021	58-63-9	C00294	HMDB00195	1.7477	1.7574	0.7553	2.0904	1.8617	1.2766	0.5767	0.617	0.7913	1.1763	0.9001	1.6422	1.689	0.8004	0.6789	1.3886	0.4371	0.9119	1.2541	0.8708	0.8609
3731	inosine 5'-monophosphate (IMP)	Nucleotide	Purine Metabolism, (Hypo)Xanthine/Inosine containing	2133	LC/MS Pos Early	362	650	349.054	8582	4691-65-0	C00130	HMDB00175	0.7276	1.2709	2.3441	0.9156	0.9766	0.4099	0.3427	0.51	0.2351	0.4565	0.4147	0.1606	0.3784	1.8955	1.7214	1.6358	1.5853	1.2556	0.7712	1.1351	1.0234
1946	inositol 1-phosphate (I1P)	Lipid	Inositol Metabolism	43849	LC/MS Polar	370	4785	259.022	440194	573-35-3;106032-59-1	C01177	HMDB00213	0.4733	1.1543	1.7722	1.4429	1.0513	0.8421	0.4937	0.4729	0.2245	0.2245	0.2245	0.2343	0.6344	1.4446	1.5579	1.7225	1.2391	0.8085	0.6987	2.0214	1.1615
362	isobutyrylcarnitine (C4)	Amino Acid	Leucine, Isoleucine and Valine Metabolism	33441	LC/MS Pos Early	100001055	2810	232.154	168379	25518-49-4		HMDB00736	0.5949	0.505	0.6483	1.4233	1.2954	2.1719	2.7123	1.0702	0.6731	1.9253	1	1.3549	0.6941	1.3387	0.505	0.593	0.505	1.566	1.0725	0.7791	0.6348
1605	isocaproylglycine	Lipid	Fatty Acid Metabolism (Acyl Glycine)	61789	LC/MS Neg	100019816	2820	172.098					0.5295	0.936	0.692	1.0479	1.0531	1.3513	0.5295	0.9914	0.5295	1.1577	0.9401	1.007	0.5295	0.7323	0.7747	1.1311	0.9285	0.993	1.1426	1.4526	0.5295
328	isoleucine	Amino Acid	Leucine, Isoleucine and Valine Metabolism	1125	LC/MS Pos Early	376	2800	132.102	6306	73-32-5	C00407	HMDB00172	0.9737	1.2212	1.4149	0.9559	1.0065	1.1443	1.0581	0.8017	1.1149	1.0864	1.0387	0.9248	0.838	1.0394	0.9935	0.9793	0.765	0.8458	0.8433	0.7738	0.7589
762	isoleucylglycine	Peptide	Dipeptide	40008	LC/MS Neg	100003169	1992	187.109	342532	868-28-0		HMDB28907	0.6873	2.0453	0.8983	0.928	0.7922	1.0719	1.5075	1.2001	2.2763	1.946	1.3559	1.7105	1.0414	0.808	0.4196	1.0463	0.7654	0.885	1.5437	0.9586	0.4831
304	isovalerylglycine	Amino Acid	Leucine, Isoleucine and Valine Metabolism	35107	LC/MS Neg	100001452	1950	158.082	546304	16284-60-9		HMDB00678	0.8562	1.2559	1.584	0.7593	0.9524	0.9189	0.534	1.0577	0.5318	1.6361	0.6257	0.3516	0.5711	0.948	1.2889	1.8126	1.7166	1.545	1.1625	0.8756	1.5093
1295	itaconate	Energy	TCA Cycle	18373	LC/MS Polar	100000455	2969	129.019	811	97-65-4	C00490	HMDB02092	0.6463	0.9638	0.828	0.852	0.9247	18.3478	3.4067	2.5722	46.6756	4.2582	11.8383	3.2193	3.1482	2.2305	0.7513	0.8793	1.0412	0.7407	1.1569	1.0362	0.7756
243	kynurenate	Amino Acid	Tryptophan Metabolism	1417	LC/MS Neg	98	2224	188.035	3845	492-27-3	C01717	HMDB00715	1.5614	1.2654	0.702	0.702	0.702	1.2792	0.7887	0.702	0.702	1	0.702	1.439	1.103	0.702	0.9033	0.702	0.777	1.6285	0.702	0.702	0.8981
239	kynurenine	Amino Acid	Tryptophan Metabolism	15140	LC/MS Pos Early	100000265	2739	209.092	161166	2922-83-0	C00328	HMDB00684	0.9813	1.4024	1.8423	1.0096	1.0806	1.5248	1.1599	0.8716	1.0174	1.0386	0.7657	0.5448	0.6603	1.6394	1.1643	0.9034	0.7107	0.792	0.7527	0.7113	0.9904
1088	lactate	Carbohydrate	Glycolysis, Gluconeogenesis, and Pyruvate Metabolism	527	LC/MS Neg	482	681.6	89.0244	612	79-33-4	C00186	HMDB00190	1.75	0.3049	0.3049	0.3049	0.3049	0.6304	0.3049	0.403	1.1487	1.8932	0.8903	0.6348	1.062	0.5823	1.1198	1.4404	0.9267	1.8533	0.938	0.6484	1.6229
288	leucine	Amino Acid	Leucine, Isoleucine and Valine Metabolism	60	LC/MS Pos Early	397	2864	132.102	6106	61-90-5	C00123	HMDB00687	0.9208	1.1838	1.2996	0.9821	0.9992	1.1816	1.1763	0.9132	1.3832	1.2884	1.2039	1.0718	0.9822	1.0955	0.9492	1.0008	0.7594	0.8488	0.9088	0.8223	0.7666
951	leucylglutamine*	Peptide	Dipeptide	48189	LC/MS Pos Early	100003183	2620	260.161	4305457			HMDB28927	0.9811	2.0936	0.4156	0.9138	0.7458	1.2954	1.5484	1.4871	6.6609	2.9705	2.2844	5.3518	2.2779	0.7523	0.2047	0.9672	0.6417	0.5902	2.2924	1.0189	0.8544
781	leucylglycine	Peptide	Dipeptide	40045	LC/MS Pos Early	100003185	2778	189.123	79070	686-50-0		HMDB28929	0.763	2.1506	0.4044	0.8894	0.7057	1.5702	1.5224	1.6565	6.5811	3.3731	2.2986	4.8322	1.9038	0.8434	0.2051	0.7974	0.6905	0.6956	2.7092	0.9672	1.0328
1648	lignoceroylcarnitine (C24)*	Lipid	Fatty Acid Metabolism (Acyl Carnitine, Long Chain Saturated)	57515	LC/MS Pos Late	100015834	1603	512.467					1.1189	0.9862	1.1244	0.9902	0.8261	0.834	1.6047	0.2954	0.688	0.6129	0.3359	0.473	0.7011	1.4589	1.3634	0.617	1.3135	1.6014	1.0563	1.0534	1.0166
1390	linoleate (18:2n6)	Lipid	Long Chain Polyunsaturated Fatty Acid (n3 and n6)	1105	LC/MS Neg	180	5535	279.233	5280450	60-33-3	C01595	HMDB00673	0.5399	0.9579	0.9648	0.7341	0.8573	2.8105	1.0533	1.0826	1.4149	1.0626	1.5508	1.2859	1.7243	1.6694	0.7788	0.905	0.4944	0.7055	0.7836	1.0352	1.2574
1392	linolenate (18:3n3 or 3n6)	Lipid	Long Chain Polyunsaturated Fatty Acid (n3 and n6)	34035	LC/MS Neg	100001337	5450	277.217	5280934		C06426	HMDB03073	0.9149	0.7436	0.9304	1.0696	0.8835	3.9632	0.7518	1.1403	2.3481	1.2662	2.1049	1.3978	2.8737	2.134	0.6698	0.8863	0.4246	0.5687	0.5982	1.0855	1.3929
1667	linoleoylcarnitine (C18:2)*	Lipid	Fatty Acid Metabolism (Acyl Carnitine, Polyunsaturated)	46223	LC/MS Pos Late	100003151	1430	424.342	6450015	36816-10-1		HMDB06469	1.0378	0.5073	0.9443	0.5593	0.4397	1.344	1.6204	0.9215	1.9131	1.4708	1.4551	0.7566	1.271	1.3259	0.9805	1.0166	0.9074	1.6059	0.9401	1.5313	0.9839
1714	linoleoylcholine*	Lipid	Fatty Acid Metabolism (Acyl Choline)	57463	LC/MS Pos Late	100015760	1388	366.337					0.4393	0.6304	2.3027	0.8404	0.6913	0.7134	1.2398	0.8024	0.9097	0.8023	1.2924	0.5924	1.0387	1.1292	1.0654	1.2845	1.017	0.9959	1.4767	1.6414	1.5537
97	lysine	Amino Acid	Lysine Metabolism	1301	LC/MS Pos Early	407	2850	147.113	5962	56-87-1	C00047	HMDB00182	0.8974	1.1508	1.496	1.0803	1.149	1.1149	0.944	0.8283	1.0098	0.997	0.999	0.7972	0.8197	1.1923	1.2329	1.1003	0.9074	0.9063	0.8026	0.8699	0.8023
801	lysylleucine	Peptide	Dipeptide	40020	LC/MS Pos Early	100003196	3370	260.197	4682588	7369-79-1		HMDB28955	0.2924	1.4567	0.2924	0.634	0.5412	0.9418	2.0409	0.2924	5.9389	2.3651	1.2524	3.2309	1.0582	0.8993	0.2924	0.5256	0.422	0.2924	1.4381	0.5947	0.4823
1291	malate	Energy	TCA Cycle	1303	LC/MS Polar	409	3343.1	133.014	525	6915-15-7	C00149	HMDB00156	1.3174	1.4654	1.3005	1.0939	0.8763	1.362	1.1877	1.1824	0.7006	0.854	1.2111	0.6531	0.8788	0.8861	0.6465	0.8759	1.1515	1.2637	0.7707	0.9061	0.8949
1309	malonate	Lipid	Fatty Acid Synthesis	15872	LC/MS Polar	818	3447	103.004	867	141-82-2;26522-22-85-0	C00383	HMDB00691	0.887	0.9715	1.0046	0.9954	0.9212	1.4571	0.8949	1.4985	1.161	1.1423	1.4901	1.5634	1.2847	1.0075	0.7494	0.7777	0.9546	1.1151	1.1481	0.953	1.0832
1308	malonylcarnitine	Lipid	Fatty Acid Synthesis	37059	LC/MS Pos Early	100001526	2086	248.113	22833583	853728-01-5		HMDB02095	0.7209	1.0019	1.2711	1.1409	1.1066	0.449	0.4676	0.6386	0.2723	0.5425	0.3893	0.301	0.4243	1.1552	0.9981	1.0316	1.1919	1.1719	0.8893	1.0983	0.8237
1136	maltohexaose	Carbohydrate	Glycogen Metabolism	35170	LC/MS Polar	100001448	5860	989.32	439606	34620-77-4	C01936	HMDB12253	1.1629	1.5831	0.6659	1.507	1.7493	0.2795	0.2795	0.2795	0.3455	0.5624	0.2795	0.2795	0.2795	0.8812	1.1081	0.2795	0.7776	1.1167	1.2463	0.9016	0.8944
1138	maltopentaose	Carbohydrate	Glycogen Metabolism	35163	LC/MS Polar	100001447	5365	827.267	13489094	34620-76-3	C06218	HMDB12254	1.2641	1.6266	0.9637	1.541	1.8291	0.3463	0.3463	0.3463	0.4419	0.5662	0.3463	0.3463	0.3463	0.9479	1.2398	0.3463	0.8493	1.0363	1.2497	0.8012	0.895
1144	maltose	Carbohydrate	Glycogen Metabolism	15586	LC/MS Polar	913	3329.4	387.114	10991489	6363-53-7	C00208	HMDB00163	1.0551	1.4614	1.2723	1.4817	1.5455	0.5005	0.0076	0.0344	0.924	0.8967	0.2079	0.1829	0.0409	1.0406	1.142	0.9223	0.9844	1.0118	1.1964	0.8523	1.0237
1139	maltotetraose	Carbohydrate	Glycogen Metabolism	15910	LC/MS Neg	100000275	910	665.215	446495	34612-38-9	C02052	HMDB01296	1.4119	1.755	1.3841	1.5943	1.5485	0.028	0.0028	0.0028	0.4938	0.6275	0.0151	0.0093	0.004	0.9406	1.5265	0.566	1.2101	1.2349	1.2978	0.8895	0.978
1141	maltotriose	Carbohydrate	Glycogen Metabolism	44688	LC/MS Neg	100000276	812	503.162	439586	1109-28-0	C01835	HMDB01262	1.224	1.5701	1.3466	1.4231	1.4603	0.0867	0.0019	0.0029	0.6436	0.7146	0.0419	0.0244	0.0019	0.9299	1.2809	0.7537	1.0444	1.1006	1.2229	0.8564	0.9178
1194	mannitol/sorbitol	Carbohydrate	Fructose, Mannose and Galactose Metabolism	46142	LC/MS Polar	100001740	2320	181.072	5780		C00794	HMDB00247	1.258	1.7649	1.3391	1.5205	1.6433	0.5984	0.2374	0.0943	0.3245	0.4	0.3538	0.609	0.3573	1.1371	3.415	1.0694	1.3312	0.9306	0.3773	0.6701	0.6999
4437	mannonate*	Xenobiotics	Food Component/Plant	62864	LC/MS Polar	100003695	2736	195.051	3246006	642-99-9			0.8456	1.044	0.7419	1.3103	1.3565	0.5663	1.0581	1.099	0.2261	0.429	0.5341	0.3169	0.3758	1.7529	1.9945	2.5995	2.0047	1.9169	1.2692	1.3893	0.956
1195	mannose	Carbohydrate	Fructose, Mannose and Galactose Metabolism	584	LC/MS Polar	803	2200	179.056	18950	3458-28-4	C00159	HMDB00169	0.8876	1.6045	1.472	1.5897	1.5947	0.21	0.0429	0.0559	0.3051	0.5284	0.1203	0.0611	0.0416	1.1648	1.5122	0.7691	1.3627	1.0661	1.001	0.9629	0.999
1340	margarate (17:0)	Lipid	Long Chain Saturated Fatty Acid	1121	LC/MS Neg	891	5731	269.249	10465	506-12-7		HMDB02259	1.0242	0.8117	1.1256	0.8703	1.0107	3.1974	1.5742	0.9198	1.4885	0.9893	1.0915	1.0952	2.1555	2.5425	0.8315	0.8475	0.6696	0.8363	0.9218	0.8048	1.6203
1402	mead acid (20:3n9)	Lipid	Long Chain Polyunsaturated Fatty Acid (n3 and n6)	35174	LC/MS Neg	100001472	5650	305.249	5312531	20590-32-3		HMDB10378	1.2718	0.8027	0.958	1.1301	1.2966	3.2664	0.9898	0.8007	0.7115	0.9583	0.8505	0.923	1.9922	2.1013	0.7503	0.6885	0.9377	1.0102	0.7685	1.0248	1.7832
370	methionine	Amino Acid	Methionine, Cysteine, SAM and Taurine Metabolism	1302	LC/MS Pos Early	415	2526	150.058	6137	63-68-3	C00073	HMDB00696	0.9022	1.1339	1.2235	0.9663	1.0035	1.1551	1.1614	0.8596	1.2354	1.1052	1.0876	0.8783	0.9064	1.1597	0.9965	1.0615	0.794	0.8223	0.8695	0.8257	0.7382
374	methionine sulfone	Amino Acid	Methionine, Cysteine, SAM and Taurine Metabolism	44878	LC/MS Pos Early	100004635	1250	182.048	69961	820-10-0			0.5945	0.5945	0.5945	0.5945	0.9334	0.5945	0.6522	0.5945	1.4644	0.5945	0.5945	0.5945	1.1837	0.5945	1.5727	0.5945	1.4677	1	0.5945	0.5945	0.5945
375	methionine sulfoxide	Amino Acid	Methionine, Cysteine, SAM and Taurine Metabolism	18374	LC/MS Pos Early	100000039	1272	166.053	158980	3226-65-1	C02989	HMDB02005	0.7831	1.1528	1.1174	1.2343	1.4163	1.5812	0.9703	0.9318	2.1458	1.475	1.6197	2.1239	1.3525	0.9881	0.7882	1.0444	0.6551	0.8059	0.9322	0.8638	0.8781
4551	methyl glucopyranoside (alpha + beta)	Xenobiotics	Food Component/Plant	46144	LC/MS Pos Early	100005864	832	212.113					1.1044	1.1447	1.065	1.1646	1.7746	0.5144	0.4472	0.266	0.9332	0.9636	0.2941	0.2793	0.3083	1.2463	0.8392	0.7077	0.9895	1.1847	1.1547	1.0801	1.6271
4112	methyl-4-hydroxybenzoate sulfate	Xenobiotics	Benzoate Metabolism	48429	LC/MS Neg	100006116	2873	230.997					1.0968	1.6587	1.0318	1.135	0.9555	0.4792	1.2801	0.4118	1.7142	2.4837	1.0009	0.8421	0.9764	0.6377	0.6572	0.5485	0.9412	1.7577	2.7022	0.4118	1.4291
1594	methylmalonate (MMA)	Lipid	Fatty Acid Metabolism (also BCAA Metabolism)	1496	LC/MS Polar	418	3078.4	117.019	487	516-05-2	C02170	HMDB00202	1.4474	1.4261	1.2766	0.9297	0.9118	1.2296	1.345	1.1163	0.7198	0.8524	0.9465	1.1402	1.1135	0.9627	0.9872	1.1617	0.9687	1.1071	0.871	0.7077	0.7261
3885	methylphosphate	Nucleotide	Purine and Pyrimidine Metabolism	37070	LC/MS Pos Early	100001805	544	113	13130	7023-27-0		HMDB61711	0.988	1.9293	0.9518	1.7049	2.5998	0.2727	0.1829	0.2276	0.8297	1.0319	0.254	0.3149	0.4438	0.8998	1.012	0.4082	1.2587	1.3732	1.7222	1.2665	1.8718
347	methylsuccinate	Amino Acid	Leucine, Isoleucine and Valine Metabolism	15745	LC/MS Polar	2051	2800	131.035	10349	498-21-5		HMDB01844	1.469	1.0886	1.4214	0.9257	0.885	0.8549	1.449	0.777	1.1833	0.8109	0.9959	0.8503	0.6512	1.4997	1.6069	1.3372	1.9899	1.4442	1.0041	1.1398	0.812
1937	myo-inositol	Lipid	Inositol Metabolism	1124	LC/MS Polar	363	3506.3	225.062	892	87-89-8	C00137	HMDB00211	1.3583	0.9157	1.2171	1.1527	1.0637	0.9071	0.7813	0.5146	1.0098	0.9773	0.844	0.9902	0.7715	1.0483	1.2892	0.759	1.3205	1.0564	0.6979	0.6854	0.7866
1337	myristate (14:0)	Lipid	Long Chain Saturated Fatty Acid	1365	LC/MS Neg	519	5440	227.202	11005	544-63-8	C06424	HMDB00806	0.9717	0.9269	0.8892	0.8965	0.872	3.4953	1.0974	1.2959	2.1281	1.488	1.9952	1.3237	2.3644	2.1624	0.753	0.9043	0.6848	0.8003	0.8754	1.0283	1.5617
1350	myristoleate (14:1n5)	Lipid	Long Chain Monounsaturated Fatty Acid	32418	LC/MS Neg	100001198	5346.9	225.186	5281119	544-64-9	C08322	HMDB02000	0.627	0.552	0.8674	0.6802	0.8041	2.3839	0.9535	1.5421	1.9975	1.7319	1.8748	1.1037	1.6331	2.2933	0.7474	1.0465	0.6514	0.7249	0.5919	1.389	1.7682
1660	myristoleoylcarnitine (C14:1)*	Lipid	Fatty Acid Metabolism (Acyl Carnitine, Monounsaturated)	48182	LC/MS Pos Late	100006051	1316	370.295	90659872	889848-55-9			0.317	0.317	0.3933	0.317	0.317	1.9847	1.004	1.8011	1.3311	1.553	0.996	1.5529	1.5034	0.9249	0.5974	1.0182	0.317	0.8957	0.8343	1.4343	0.5746
1641	myristoylcarnitine (C14)	Lipid	Fatty Acid Metabolism (Acyl Carnitine, Long Chain Saturated)	33952	LC/MS Pos Late	100001270	1350	372.311	6426854	18822-89-4		HMDB05066	0.5124	0.5246	0.6076	0.6319	0.4605	2.8053	1.3342	1.9085	2.9256	2.414	2.2772	1.8352	1.7703	1.0224	0.6516	1.227	0.5464	0.9776	1.155	1.6985	0.9759
470	N('1)-acetylspermidine	Amino Acid	Polyamine Metabolism	57689	LC/MS Pos Early	187	3075	188.176	496	14278-49-0	C00612	HMDB01276	0.4444	0.2611	0.9853	0.7998	0.9094	0.5851	1.9751	0.588	8.2311	27.3103	1.3471	0.481	0.7132	7.4997	1.0741	1.4824	1.7642	1.5492	0.8864	1.2539	0.9619
128	N,N,N-trimethyl-5-aminovalerate	Amino Acid	Lysine Metabolism	57687	LC/MS Pos Early	100015962	2186	160.133					1.2649	0.7621	0.9587	0.6321	0.6219	1.8409	2.8538	1.9066	1.2164	1.9474	2.3355	1.0734	1.0413	1.6287	0.9239	1.3035	1.1217	0.6853	0.6778	0.8494	0.7625
446	N,N,N-trimethyl-alanylproline betaine (TMAP)	Amino Acid	Urea cycle; Arginine and Proline Metabolism	62947	LC/MS Pos Early	100020217	2470	229.155					1.0523	0.223	1.3707	0.223	0.9647	0.9073	0.6353	0.2549	2.1572	7.2207	0.4181	0.223	0.223	1.7428	1.4968	1.2105	1.1708	0.223	0.223	0.7867	0.8404
3924	N1-Methyl-2-pyridone-5-carboxamide	Cofactors and Vitamins	Nicotinate and Nicotinamide Metabolism	40469	LC/MS Pos Early	100001468	1250	153.066	69698	701-44-0	C05842	HMDB04193	0.8455	0.7372	1.7004	1.1726	0.9749	0.6957	0.93	1.1973	0.6023	0.6934	2.1163	1.5128	0.8281	1.4453	1.454	0.8472	2.3114	1.211	0.681	0.9752	0.7405
3925	N1-Methyl-4-pyridone-3-carboxamide	Cofactors and Vitamins	Nicotinate and Nicotinamide Metabolism	57584	LC/MS Pos Early	100001469	1260	153.066	440810	769-49-3	C05843	HMDB04194	0.7992	0.8497	1.6636	1.0398	0.9511	0.6119	1.0774	0.8038	0.3824	0.5575	1.872	0.7461	0.4454	1.422	1.3888	1.1093	1.8173	1.1741	0.8661	1.0467	0.7735
3763	1-methyladenosine	Nucleotide	Purine Metabolism, Adenine containing	15650	LC/MS Pos Early	1242	2120	282.12	27476	15763-06-1	C02494	HMDB03331	0.9821	1.3718	3.2414	0.9529	0.7451	0.6626	1.3195	0.5594	0.5594	1.7334	0.5594	0.6243	2.1783	0.5594	0.6154	1.7117	0.8703	0.7809	0.5594	1.5862	0.5594
98	N2-acetyllysine	Amino Acid	Lysine Metabolism	36751	LC/MS Polar	100001721	3372.6	187.109	92907	1946-82-3	C12989	HMDB00446	2.1243	1.1554	1.2962	1.0101	0.8573	0.488	0.9899	0.4831	0.4306	0.8098	0.367	0.2108	0.3789	1.2111	1.2571	0.9468	1.5689	1.5471	0.8185	1.1292	0.8389
108	N6,N6,N6-trimethyllysine	Amino Acid	Lysine Metabolism	1498	LC/MS Pos Early	189	2825	189.16	440120	23284-33-5	C03793	HMDB01325	0.7293	1.3084	1.3752	1.0324	1.0792	1.1833	0.9676	0.6504	1.0718	1.5251	0.9466	0.6253	0.7983	1.0414	1.3016	1.3081	0.7624	0.8907	0.5559	0.8237	0.6894
107	N6,N6-dimethyllysine	Amino Acid	Lysine Metabolism	62862	LC/MS Pos Early	100020417	2831	175.144	193344	2259-86-1	C05545	HMDB13287	0.8876	1.0416	1.18	1.1387	1.314	1.7165	1.2792	0.8004	1.8372	1.7202	1.3346	1.0497	1.22	0.9488	0.8582	0.9196	0.4052	0.4846	0.5867	0.5143	0.5272
99	N6-acetyllysine	Amino Acid	Lysine Metabolism	36752	LC/MS Neg	100001734	1059	187.109	92832	692-04-6	C02727	HMDB00206	0.7055	0.9674	0.9164	1.0522	1.5198	2.4754	1.8292	0.717	2.3664	1.5587	1.6326	1.7754	2.3006	1.2225	0.6928	0.9932	0.3137	0.3727	0.6051	0.6546	0.8645
106	N6-methyllysine	Amino Acid	Lysine Metabolism	62860	LC/MS Pos Early	100003415	2831	161.129	164795	1188-07-4	C02728	HMDB02038	0.962	0.9139	1.1882	0.9732	1.0151	1.2014	1.1053	0.63	1.0985	1.4749	1.0236	0.6073	0.7408	1.1768	1.3329	0.9849	0.8347	0.7161	0.5572	0.6354	0.6212
3784	N6-succinyladenosine	Nucleotide	Purine Metabolism, Adenine containing	48130	LC/MS Polar	100001664	3421	382.1	165243	4542-23-8		HMDB00912	0.5356	0.5356	0.9856	0.5356	0.5356	0.7511	0.5554	1.2664	0.5356	0.5356	1.4774	0.5356	3.1635	1.3413	1.3116	0.8892	1.1786	1	0.5356	0.5356	0.5356
71	N-acetyl-1-methylhistidine*	Amino Acid	Histidine Metabolism	43255	LC/MS Pos Early	100004299	2100	212.103	193270				0.7137	0.4704	0.7344	0.6149	0.7984	1.2751	1.2345	1.8018	1.0523	2.9781	1	0.6684	0.3698	1.643	0.8317	1.5207	1.1621	1.2348	0.7235	1.4205	1.1833
30	N-acetylalanine	Amino Acid	Alanine and Aspartate Metabolism	1585	LC/MS Neg	1110	861	130.051	88064	97-69-8	C02847	HMDB00766	0.6602	1.1253	1.0111	0.7613	0.948	1.5035	1.1062	0.999	1.0949	0.8984	1.0621	0.9674	1.1876	1.5033	0.5007	0.8807	0.8474	0.8012	1.1059	1.001	1.0212
429	N-acetylarginine	Amino Acid	Urea cycle; Arginine and Proline Metabolism	33953	LC/MS Pos Early	100001266	2245	217.13	67427	155-84-0	C02562	HMDB04620	1.2793	0.3475	0.5662	0.3963	0.2945	0.2945	0.9594	0.2945	0.3522	0.2945	0.2945	0.2945	0.2945	1.0888	1.3247	0.2945	1.9106	1.0406	0.3149	0.7302	0.2945
40	N-acetylasparagine	Amino Acid	Alanine and Aspartate Metabolism	33942	LC/MS Pos Early	100001257	785	175.071	99715	4033-40-3		HMDB06028	1.2125	1.0407	1.3126	0.9215	0.9362	0.7934	0.6132	0.9593	1.115	1.4474	1.4516	0.6652	0.8942	0.5865	0.8309	0.8566	0.8472	1.4135	1.5123	1.052	1.0989
36	N-acetylaspartate (NAA)	Amino Acid	Alanine and Aspartate Metabolism	22185	LC/MS Polar	100000787	3143	174.041	65065	997-55-7;997-55-7	C01042	HMDB00812	0.7067	0.8863	1.2836	1.4924	1.3594	1.7122	0.9601	0.9527	2.081	1.0578	1.5592	0.6306	0.8071	1.0973	0.9073	2.832	0.9781	1.2329	0.6403	1.0219	0.8364
433	N-acetylcitrulline	Amino Acid	Urea cycle; Arginine and Proline Metabolism	48434	LC/MS Neg	100001577	940	216.099	656979	33965-42-3	C15532	HMDB00856	0.9879	0.6836	0.6836	0.6836	0.6836	0.6836	1.299	0.6836	0.6836	0.6836	0.6836	0.6836	0.6836	3.1004	1.3912	0.9371	2.3736	1.0121	0.8328	0.8907	0.9135
391	N-acetylcysteine	Amino Acid	Methionine, Cysteine, SAM and Taurine Metabolism	1586	LC/MS Pos Early	1107	1416	164.038	12035	616-91-1	C06809	HMDB01890	1.0687	1.0002	1.2492	0.8202	0.9672	1.3805	1.5896	1.3829	1.4045	1.7566	1.5904	0.9697	1.7663	0.899	0.9237	0.9481	0.9272	0.9737	1.2005	0.9998	1.3417
1253	N-acetyl-glucosamine 1-phosphate	Carbohydrate	Aminosugar Metabolism	15741	LC/MS Polar	1212	4052	300.049	440364	31281-59-1	C04256	HMDB01367	0.9799	1.63	0.4386	0.8048	0.8024	0.9222	1.1398	1.3227	1.6975	1.5142	1.1486	1.3352	1.8327	0.7582	0.3488	0.6108	0.5662	1.0201	1.9761	1.569	1.5063
1252	N-acetylglucosamine 6-phosphate	Carbohydrate	Aminosugar Metabolism	15107	LC/MS Polar	1213	4114	300.049	439219	102029-88-9	C00357	HMDB02817	0.7077	1.5586	1.1845	0.9569	1.0157	0.7719	0.9423	1.5356	0.3235	0.3621	0.6037	0.3235	0.3423	1.8735	1.2745	1.3711	0.9843	1.2922	1.0445	2.6837	1.3714
1273	N-acetylglucosamine/N-acetylgalactosamine	Carbohydrate	Aminosugar Metabolism	46539	LC/MS Pos Early	100006435	715	222.097	24139			HMDB00215	1.0065	1.1635	1.4751	1.2031	1.2676	1.1474	0.9935	1.1117	0.7676	0.6794	1.0746	0.5322	0.7441	1.0921	1.4605	1.1793	0.762	0.8606	0.6321	0.8445	0.8041
1270	N-acetylglucosaminylasparagine	Carbohydrate	Aminosugar Metabolism	48149	LC/MS Pos Early	1215	1212	336.14	123826	2776-93-4	C04540	HMDB00489	0.2654	0.2654	1.5471	0.6579	0.2654	0.2654	0.5854	0.9072	0.2654	0.2654	0.7686	0.2654	0.2654	1.4363	1.7671	1.0679	1.6171	1.4822	0.9094	1.1102	1
45	N-acetylglutamate	Amino Acid	Glutamate Metabolism	15720	LC/MS Pos Early	100000282	1050	190.071	70914	5817-08-03	C00624	HMDB01138	1.014	0.8089	0.8862	0.7764	0.7904	0.9908	0.9811	1.2603	1.0975	0.7878	1.1576	0.6903	0.9179	1.3817	1.2164	1.0092	1.1771	1.1116	1.1956	1.2553	0.9125
46	N-acetylglutamine	Amino Acid	Glutamate Metabolism	33943	LC/MS Pos Early	100001253	845	189.087	182230	2490-97-3	C02716	HMDB06029	1.3447	0.9287	0.9796	0.8742	0.8621	1.2027	0.6735	0.91	1.5412	1.6582	1.4965	0.8859	0.5966	0.7589	0.9776	0.8736	1.0204	1.8663	1.39	1.3847	1.2365
2	N-acetylglycine	Amino Acid	Glycine, Serine and Threonine Metabolism	27710	LC/MS Pos Early	100001006	826	118.05	10972	543-24-8		HMDB00532	0.7629	1.3058	1.0409	0.986	0.9608	0.9476	0.4987	1.6059	0.8091	1.2362	1.014	0.5734	0.8246	1.0836	0.5609	1.407	1.0276	1.3922	1.2546	1.6161	1.5473
69	N-acetylhistidine	Amino Acid	Histidine Metabolism	33946	LC/MS Pos Early	100001293	2065	198.087	75619	39145-52-3	C02997	HMDB32055	1.1997	0.7584	1.1494	0.7273	0.7825	0.4866	0.5347	0.5201	1.3718	1.6232	1.0003	0.313	0.2239	1.5178	1.5906	0.8788	1.9409	1.352	0.9122	0.9997	0.8815
289	N-acetylleucine	Amino Acid	Leucine, Isoleucine and Valine Metabolism	1587	LC/MS Neg	1082	2400	172.098	70912	1188-21-2	C02710	HMDB11756	1.4121	0.9565	0.9683	0.7182	0.8761	1.2607	0.9271	1.0317	1.1666	1.4644	1.7754	1.0631	1.3333	0.8622	0.4643	0.5894	0.5677	1.32	1.6546	0.8752	0.9291
371	N-acetylmethionine	Amino Acid	Methionine, Cysteine, SAM and Taurine Metabolism	1589	LC/MS Neg	1083	1787	190.054	448580	65-82-7	C02712	HMDB11745	0.6465	0.8564	0.5724	0.6507	1.0446	1.6279	1.2551	0.9489	1.4432	1.2558	1.1456	1.6177	1.7634	1.443	0.4406	0.7011	0.5936	0.6924	1.3981	1.2341	1.2115
376	N-acetylmethionine sulfoxide	Amino Acid	Methionine, Cysteine, SAM and Taurine Metabolism	45428	LC/MS Pos Early	100005463	880	208.064	193368	108646-71-5			0.6971	1.0013	0.686	0.8589	0.9319	2.1371	1.8378	1.7299	2.9713	2.3714	2.0039	3.4091	2.9107	0.9723	0.2929	0.8471	0.6672	0.9987	2.3694	1.38	1.3586
1259	N-acetylneuraminate	Carbohydrate	Aminosugar Metabolism	32377	LC/MS Pos Early	1162	660	310.113	439197	131-48-6	C00270	HMDB00230	0.6583	0.6315	0.9911	0.83	0.5621	2.3013	1.7882	1.9244	2.1477	2.0166	2.2829	2.02	1.6891	1.9306	0.6152	0.8523	0.9967	0.8929	1.5345	1.0069	1.0033
130	N-acetylphenylalanine	Amino Acid	Phenylalanine Metabolism	33950	LC/MS Neg	100001256	2597	206.082	74839	2018-61-3	C03519	HMDB00512	1.0006	0.9184	0.9147	0.9346	0.8679	0.9921	1.3299	0.8445	2.4557	1.8983	1.3951	1.1963	1.7844	0.9994	0.8397	1.235	0.7605	1.0021	1.4612	1.0324	1.0455
10	N-acetylserine	Amino Acid	Glycine, Serine and Threonine Metabolism	37076	LC/MS Pos Early	100001851	800	148.06	65249	97-14-3		HMDB02931	0.9278	1.0743	1.0803	1.1806	1.1561	1.459	1.1968	1.1139	0.9662	0.9119	1.1006	0.6728	1.0115	1.1797	0.7861	0.9885	0.8488	0.8731	0.8765	0.797	0.7943
407	N-acetyltaurine	Amino Acid	Methionine, Cysteine, SAM and Taurine Metabolism	48187	LC/MS Neg	100005466	800	166.018	159864				0.7649	1	0.9034	0.6286	0.4822	1.2082	1.4868	1.6428	0.9102	2.0785	1.1091	0.8349	2.3846	1.1259	0.8921	2.3463	0.9426	1.5982	0.9104	1.8051	1.0616
17	N-acetylthreonine	Amino Acid	Glycine, Serine and Threonine Metabolism	33939	LC/MS Neg	100001274	821.6	160.061	152204	17093-74-2		HMDB62557	0.4998	1.5003	1.0846	1.0978	1.0405	1.1545	1.1327	1.0949	0.4089	0.5079	0.7724	0.7731	0.8404	1.453	0.8385	1.1414	1.2423	0.8789	1.1653	0.9285	0.8102
3812	N-carbamoylaspartate	Nucleotide	Pyrimidine Metabolism, Orotate containing	1594	LC/MS Polar	1108	3800	175.036	93072	923-37-5	C00438	HMDB00828	1.3997	0.5977	0.9992	0.4792	0.4594	0.8577	1.416	0.9998	0.7784	0.5058	1.7053	0.7641	0.413	3.3292	2.278	1.0481	0.9108	2.1482	1.8227	1.6981	0.668
1372	nervonate (24:1n9)*	Lipid	Long Chain Monounsaturated Fatty Acid	52674	LC/MS Neg	100001231	6804	365.342	5281120	506-37-6	C08323	HMDB02368	1.1178	0.178	0.3327	0.8879	1.0606	5.1458	0.9966	1.0963	1.1595	0.5802	1.0034	1.4298	3.597	3.8569	0.3397	0.2091	0.3847	0.3553	0.3502	0.2565	1.1376
1665	nervonoylcarnitine (C24:1)*	Lipid	Fatty Acid Metabolism (Acyl Carnitine, Monounsaturated)	57531	LC/MS Pos Late	100015846	1602	510.452					0.91	0.8132	0.5435	0.8492	0.7967	1.5484	1.3231	0.5435	0.5435	0.6802	0.5435	0.5435	0.8427	1.5734	1.1194	0.8234	1.408	2.0897	1.5342	1.5225	1.0144
372	N-formylmethionine	Amino Acid	Methionine, Cysteine, SAM and Taurine Metabolism	2829	LC/MS Neg	194	1543.8	176.039	439750	4289-98-9	C03145	HMDB01015	1.089	1.0301	1.5063	0.8112	0.904	0.8949	0.6465	0.7875	0.9759	1.1225	0.8335	0.5998	0.8379	1.1772	0.6875	0.8239	1.1007	1.1571	1.0241	1.2323	1.2115
208	N-formylphenylalanine	Amino Acid	Tyrosine Metabolism	48433	LC/MS Neg	100006056	2360	192.067	759256	13200-85-6			0.6615	0.8801	0.6615	0.6615	0.6615	1.3636	0.6615	0.6615	1.0893	0.983	1.1593	1.017	0.9265	0.6615	0.6615	0.6615	0.6615	0.6615	0.6615	0.6615	0.6615
1274	N-glycolylneuraminate	Carbohydrate	Aminosugar Metabolism	37123	LC/MS Pos Early	100001491	636	326.108	123802	1113-83-3	C03410	HMDB00833	0.6729	0.8973	1.0426	0.8079	0.7859	1.3937	1.1881	1.5119	1.0275	0.9692	1.1999	0.9897	1.2114	1.6349	1.0991	1.1431	1.0103	1.0836	0.8834	0.8978	0.8409
3905	nicotinamide	Cofactors and Vitamins	Nicotinate and Nicotinamide Metabolism	594	LC/MS Pos Early	432	1942	123.055	936	98-92-0	C00153	HMDB01406	0.971	1.2148	1.33	1.101	1.1032	0.7792	0.6231	0.8375	0.5761	0.7277	0.7343	0.5833	0.7016	1.1988	1.0968	1.0065	1.1092	1.1527	0.9935	0.8879	0.9851
3909	NAD+	Cofactors and Vitamins	Nicotinate and Nicotinamide Metabolism	5278	LC/MS Neg	1310	1434	662.102	5893	53-84-9	C00003	HMDB00902	0.5701	1.0062	1.6407	0.7979	0.788	0.6085	0.9938	1.1792	0.5001	0.6966	0.8487	0.4683	0.4776	1.4445	3.3954	2.1398	2.7852	1.3693	0.8934	1.6094	1.065
3916	nicotinamide N-oxide	Cofactors and Vitamins	Nicotinate and Nicotinamide Metabolism	39582	LC/MS Pos Early	100002763	877	139.05	72661	1986-81-8		HMDB02730	1.0676	1.2016	1.049	1.3021	1.1705	1.1209	0.5679	0.687	1.1769	0.951	0.7874	1.0531	0.8725	0.6741	0.7519	0.754	1.1981	1.2727	1.3252	0.7298	1.1929
3907	nicotinamide ribonucleotide (NMN)	Cofactors and Vitamins	Nicotinate and Nicotinamide Metabolism	22152	LC/MS Pos Early	1312	766	335.064	14180	1094-61-7	C00455	HMDB00229	0.892	1.1437	1.3971	0.7129	0.6099	0.1116	1.0109	1.1961	0.0524	0.1813	0.3278	0.0275	0.1536	1.7491	2.7049	2.5497	2.136	1.9378	0.9891	2.5984	1.4125
3908	nicotinamide riboside	Cofactors and Vitamins	Nicotinate and Nicotinamide Metabolism	33013	LC/MS Pos Early	100001310	2040	255.098	439924	1341-23-7	C03150	HMDB00855	1.8965	1.6473	0.7434	1.6518	1.5902	0.4457	0.6445	0.5859	0.2076	0.425	0.3603	0.2348	1.0018	1.2057	1.5833	1.9695	0.9982	1.3304	0.721	1.5848	1.2998
3904	nicotinic acid mononucleotide (NaMN)	Cofactors and Vitamins	Nicotinate and Nicotinamide Metabolism	32461	LC/MS Pos Early	100001058	648	336.048	5288991	321-02-8	C01185	HMDB01132	0.433	1.0128	2.3118	0.9913	1.3088	0.433	0.433	0.433	0.433	0.433	0.433	0.433	0.433	1.3578	2.813	1.0087	1.6164	0.6061	0.7873	0.433	0.9335
1388	nisinate (24:6n3)	Lipid	Long Chain Polyunsaturated Fatty Acid (n3 and n6)	57810	LC/MS Neg	100015785	5657	355.264	11792612	68378-49-4		HMDB02007	0.6519	0.843	1.0498	0.7448	1.03	1.844	0.7664	0.5881	1.4462	1.4594	1.0528	0.6799	0.97	2.5451	0.636	0.6901	0.7131	0.8841	0.7203	1.1114	2.2081
57	N-methyl-GABA	Amino Acid	Glutamate Metabolism	39577	LC/MS Pos Early	100003152	2109	118.086	70703	1119-48-8	C15987		1.7355	1.0552	1.767	0.8442	0.8704	0.2673	0.8431	0.3421	0.4925	1.0812	0.5198	0.1892	0.1603	1.8118	2.1201	0.468	2.0837	1.7799	0.8003	0.9682	1.0318
448	N-monomethylarginine	Amino Acid	Urea cycle; Arginine and Proline Metabolism	43586	LC/MS Pos Early	100004488	2845	189.135	132862	53308-83-1	C03884	HMDB29416	0.9473	1.0893	1.1539	1.0401	1.1107	1.4963	1.0266	0.7942	1.0152	1.0459	1.0042	0.9006	0.9209	1.0487	1.0235	0.9958	0.679	0.7343	0.7181	0.7387	0.6425
1342	nonadecanoate (19:0)	Lipid	Long Chain Saturated Fatty Acid	1356	LC/MS Neg	892	6068	297.28	12591	646-30-0	C16535	HMDB00772	1.0881	0.926	1.3578	1.0403	1.2467	2.0033	1.7787	0.7463	1.1092	0.6956	0.8174	0.8463	1.7628	2.806	1.045	0.7979	0.9252	0.8773	0.9597	0.7541	2.0398
1615	N-palmitoylglycine	Lipid	Fatty Acid Metabolism (Acyl Glycine)	42092	LC/MS Neg	100003686	5580	312.254	151008	2441-41-0		HMDB13034	0.717	0.6479	1.8309	0.6541	0.8324	2.392	1.4835	0.6182	0.6182	0.7512	0.862	0.6182	1.6066	2.7249	1.1489	1	0.6182	0.649	0.6182	0.6182	0.6182
1911	N-stearoyltaurine	Lipid	Endocannabinoid	39730	LC/MS Neg	100003240	5782	390.268	168274	63155-80-6			0.3567	0.2607	0.2607	0.2607	0.2607	2.3104	2.9526	0.9819	0.796	1.1491	1.0779	0.8278	2.3179	1.8361	0.2607	0.3167	0.2607	0.2607	0.2607	0.2607	0.479
1519	octadecenedioate (C18:1-DC)*	Lipid	Fatty Acid, Dicarboxylate	61861	LC/MS Neg	100019978	4875	311.223					1.0579	0.8485	1.1707	0.7701	0.6689	1.6024	1.5715	0.9954	2.626	1.925	1.4957	0.8805	0.6493	0.6377	1.1352	0.6786	1.0046	0.7935	0.863	1.1093	0.9417
1357	oleate/vaccenate (18:1)	Lipid	Long Chain Monounsaturated Fatty Acid	52285	LC/MS Neg	100008930	5655	281.249					0.6844	0.9309	0.9033	0.8273	0.9832	3.2196	1.0732	1.0168	1.2894	1.2251	1.4966	1.37	1.8468	1.9756	0.723	0.7698	0.5506	0.6973	0.7416	1.0672	1.445
1897	oleoyl ethanolamide	Lipid	Endocannabinoid	38102	LC/MS Pos Late	1137	1661	326.305	5283454	11-58-0;111-58-0		HMDB02088	1.283	0.8364	1.0314	0.9124	0.6304	1.689	1.3704	0.7597	2.1349	1.6259	1.3357	1.4864	1.2525	1.1243	1.1059	0.6376	0.6322	0.9121	0.6041	0.7976	0.6205
1662	oleoylcarnitine (C18)	Lipid	Fatty Acid Metabolism (Acyl Carnitine, Monounsaturated)	35160	LC/MS Pos Late	100001501	1423	426.358	6441392	38677-66-6		HMDB05065	0.6524	0.5822	0.7234	0.6306	0.4926	1.4774	1.027	0.973	2.93	2.6407	1.3299	1.0483	0.9704	1.1209	0.966	1.081	0.8294	1.2135	1.0355	2.05	1.0485
1710	oleoylcholine	Lipid	Fatty Acid Metabolism (Acyl Choline)	53260	LC/MS Pos Late	100009331	1449	368.352					0.4732	0.6432	1.8414	0.826	0.7121	0.8732	1.148	0.743	0.8773	0.8483	1.1266	0.6715	1.1712	1.0915	1.2053	1.1579	0.9433	0.8327	1.4342	1.7219	1.4959
198	O-methyltyrosine	Amino Acid	Tyrosine Metabolism	37451	LC/MS Pos Early	100002078	2790	196.097	76957	1080-06-4			0.6811	1.341	0.9734	0.952	0.8578	0.9414	0.9936	0.844	2.0906	1.5432	1.1799	1.6454	1.174	1.269	0.6606	1.0733	0.9864	0.863	1.2428	1.0064	1.1776
503	ophthalmate	Amino Acid	Glutathione Metabolism	34592	LC/MS Pos Early	100001311	2085	290.135	7018721	495-27-2		HMDB05765	0.7025	0.6897	0.9882	0.622	0.5663	4.5965	1.3265	3.443	3.0457	1.8474	10.3028	3.6019	0.7425	5.1908	0.8618	1.5743	0.644	1.1095	0.9619	0.4861	0.5899
417	ornithine	Amino Acid	Urea cycle; Arginine and Proline Metabolism	1493	LC/MS Pos Early	444	2800	133.097	6262	3184-13-2	C00077	HMDB03374	0.7531	1.1073	1.1964	1.0177	1.0859	1.2673	0.9378	0.8797	1.1446	1.0107	1.1062	0.6436	0.8856	1.0933	0.9937	1.0063	0.7788	0.7487	0.8643	0.7662	0.816
3814	orotate	Nucleotide	Pyrimidine Metabolism, Orotate containing	1505	LC/MS Polar	445	1638.1	155.01	967	50887-69-9	C00295	HMDB00226	1.1996	0.7212	1.1861	0.5746	0.5581	0.9577	1.2736	1.0247	0.3135	0.2329	0.8124	0.4156	0.3222	3.132	1.8355	0.8904	0.9753	1.4898	1.7064	1.2001	0.6088
3816	orotidine	Nucleotide	Pyrimidine Metabolism, Orotate containing	35172	LC/MS Polar	100001416	2250	287.052	92751	314-50-1		HMDB00788	1.0037	1.0406	0.9488	0.9963	0.9257	1.4366	0.5948	0.7398	2.6678	1.9591	1.2937	0.5426	0.5589	1.8746	1.0843	0.63	1.234	1.386	0.6971	0.6222	0.5711
5197	O-sulfo-L-tyrosine	Xenobiotics	Chemical	45413	LC/MS Neg	100005384	990	260.023	514186				0.9514	0.622	0.7689	0.622	0.622	1.0096	1	0.926	1.7081	1.2116	1.4073	1.0457	1.029	0.7785	0.841	0.897	1.0841	1.1559	0.622	0.9732	0.622
3952	oxalate (ethanedioate)	Cofactors and Vitamins	Ascorbate and Aldarate Metabolism	20694	LC/MS Neg	100000841	603	88.988	971	144-62-7	C00209	HMDB02329	1.0792	1.0138	0.8235	0.7661	0.9715	1.7409	1.0767	1.3054	1.2839	1.3066	1.1705	1.3099	1.2421	1.0884	0.6158	0.9757	0.8317	0.8976	1.0812	0.8353	0.9277
1339	palmitate (16:0)	Lipid	Long Chain Saturated Fatty Acid	1336	LC/MS Neg	424	5618	255.233	985	57-10-3	C00249	HMDB00220	0.7122	0.9962	0.9111	0.8218	1.0038	2.7353	1.1669	1.0515	1.0168	1.071	1.3593	1.2529	1.8575	1.7932	0.7703	0.8465	0.5853	0.7613	0.7949	0.9612	1.3574
1353	palmitoleate (16:1n7)	Lipid	Long Chain Monounsaturated Fatty Acid	33447	LC/MS Neg	452	5475	253.217	445638	373-49-9	C08362	HMDB03229	0.9937	0.7893	0.7136	0.8774	0.758	3.9754	0.8509	1.111	2.4949	2.3826	2.1475	1.5407	2.661	1.927	0.6497	0.637	0.472	0.4843	0.4854	1.0185	1.1598
1661	palmitoleoylcarnitine (C16:1)*	Lipid	Fatty Acid Metabolism (Acyl Carnitine, Monounsaturated)	53223	LC/MS Pos Late	100009406	1357	398.327	71464547				0.5379	0.5169	0.601	0.4398	0.3295	1.5234	0.7504	1.0777	3.2642	4.0594	1.58	1.0448	1.2483	1.1252	0.8732	0.9796	0.7091	1.08	0.75	2.2917	0.9549
1711	palmitoloelycholine	Lipid	Fatty Acid Metabolism (Acyl Choline)	53257	LC/MS Pos Late	100009334	1385	340.321					0.5949	0.7843	1.5693	0.6496	0.5839	0.7893	1.031	1.036	1.0942	1.4361	1.3489	0.7077	0.969	0.9565	0.858	1.066	0.9356	0.7496	1.1988	1.4454	1.1652
1900	palmitoyl ethanolamide	Lipid	Endocannabinoid	38165	LC/MS Neg	1489	6300	298.275	4671	544-31-0	C16512	HMDB02100	0.6503	1.0024	1.0305	0.7963	1.1559	3.2217	1.1926	0.9631	1.8114	0.9976	0.9899	1.4377	1.9348	1.7064	0.9052	0.7233	0.8588	0.8152	1.0948	0.7895	1.612
1643	palmitoylcarnitine (C16)	Lipid	Fatty Acid Metabolism (Acyl Carnitine, Long Chain Saturated)	44681	LC/MS Pos Late	100000776	1425	400.342	461	6865-14-1	C02990	HMDB00222	0.7328	0.4714	0.7712	0.5179	0.4083	1.6156	1.3841	1.207	1.9623	1.6522	1.4222	1.1256	1.2629	1.2392	0.7201	1.1959	0.6212	1.2391	0.8744	1.4667	0.746
1709	palmitoylcholine	Lipid	Fatty Acid Metabolism (Acyl Choline)	52944	LC/MS Pos Late	100009233	1482	342.337	151731				0.6519	0.5927	1.4396	0.8044	0.6746	1.3355	2.0773	1.9858	0.8919	0.6479	1.752	1.1905	2.1729	1.1664	1.0695	1.1197	0.7099	0.8785	0.8747	1.2527	1.0072
3936	pantetheine	Cofactors and Vitamins	Pantothenate and CoA Metabolism	57555	LC/MS Pos Early	100001495	2056	279.137	439322	496-65-1	C00831		1.304	0.9127	1.4633	0.9382	1.2093	0.2664	1.1978	0.7605	0.2695	0.4881	0.6671	0.4077	0.9429	1.3835	1.2583	0.8207	1.4961	1.1062	0.7849	1.1357	1.0593
3934	pantothenate (Vitamin B5)	Cofactors and Vitamins	Pantothenate and CoA Metabolism	1508	LC/MS Pos Early	1024	1667	220.118	6613	137-08-6	C00864	HMDB00210	1.0777	0.8863	1.2136	1.0344	1.0571	1.337	1.0597	1.2569	0.8467	0.6647	1.1539	1.0257	1.3763	1.2634	0.9743	0.9318	0.8334	0.8	0.6127	0.6777	0.628
4119	p-cresol sulfate	Xenobiotics	Benzoate Metabolism	36103	LC/MS Neg	100001315	2890	187.007	4615423	3233-57-7		HMDB11635	1.7325	1.5146	0.2582	1.0318	1.0034	1.2151	0.7654	0.7395	0.7287	1.0545	0.9966	1.5793	1.0798	0.8306	0.8953	0.7529	0.9507	4.4779	1.0244	0.9873	0.8675
4825	penicillin G	Xenobiotics	Drug - Antibiotic	37468	LC/MS Pos Early	100002155	2870	335.106	5904	69-57-8	C05551	HMDB15186	1.3918	1.1495	2.7695	0.8227	0.8645	1.1578	0.7976	0.5171	1.0623	1.3534	1.3117	1.3449	0.8712	0.0218	1.1463	0.9195	1.0179	1.129	0.9821	0.7009	0.8015
1338	pentadecanoate (15:0)	Lipid	Long Chain Saturated Fatty Acid	1361	LC/MS Neg	980	5521	241.217	13849	1002-84-2;10002-84-2	C16537	HMDB00826	0.8278	1.3135	0.9586	0.7391	0.9993	2.4013	1.0542	0.9983	1.247	1.2321	1.3629	1.3152	1.732	1.6584	0.8754	0.7827	0.7313	0.8361	0.9443	1.0007	1.6022
5293	perfluorooctanesulfonate (PFOS)	Xenobiotics	Chemical	57564	LC/MS Polar	100010955	662	498.93	74483	1763-23-1	C18142	HMDB59586	1.1113	1.1312	1.2495	1.2743	1.148	0.9066	0.6981	1.1182	0.7196	0.9374	0.8398	0.9812	1.018	1.0118	0.7999	0.9882	1.0525	1.1511	0.771	0.9695	0.9541
172	phenol glucuronide	Amino Acid	Tyrosine Metabolism	52747	LC/MS Neg	100006679	1800	269.067	87235	17685-05-1		HMDB60014	1.2282	1.6396	1.8612	0.657	0.6141	0.6141	0.6141	0.6141	0.7335	1.0213	0.6569	0.6141	0.6141	0.6141	0.9657	0.9787	1.9073	1.5499	0.6502	0.8197	1.2433
5291	phenol red	Xenobiotics	Chemical	36817	LC/MS Neg	100001724	3665.9	353.049	4766	143-74-8	C12600		2.1501	1.2039	3.2986	0.8969	0.8819	1.5434	1.7238	0.5676	1.6394	1.4298	1.5088	2.4178	1.6329	0.548	0.834	0.7306	0.7726	1.1031	0.8462	0.8078	0.855
171	phenol sulfate	Amino Acid	Tyrosine Metabolism	32553	LC/MS Neg	100001510	2156	172.991	74426	937-34-8	C02180	HMDB60015	1.2095	1.3897	1.6342	0.9074	0.9526	1.0795	0.5393	1.3054	0.3929	1.128	0.8562	0.4961	0.5174	1.0186	0.9814	1.1448	0.7951	1.1811	0.8152	0.7177	0.7879
1038	phenylacetylglycine	Peptide	Acetylated Peptides	33945	LC/MS Neg	100001275	2375	192.067	68144	500-98-1	C05598	HMDB00821	1.5301	1.4106	2.6363	1.0002	0.9713	1.0717	0.8759	0.4679	0.6732	1.2055	0.8419	0.9826	0.7988	0.9583	1.6728	0.9998	1.2346	1.1822	0.9055	0.6309	0.8275
129	phenylalanine	Amino Acid	Phenylalanine Metabolism	64	LC/MS Pos Early	460	2878	166.086	6140	63-91-2	C00079	HMDB00159	0.8865	1.1509	1.2112	0.9708	0.9983	1.1673	1.1736	0.8963	1.2235	1.1593	1.1017	1.0064	0.9344	1.1475	0.9403	1.0017	0.7757	0.8223	0.8885	0.8132	0.7513
830	phenylalanylalanine	Peptide	Dipeptide	41374	LC/MS Pos Early	100003589	2909	237.123	5488196	3918-87-4			0.5059	1.6052	0.455	0.6749	0.612	1.2838	1.2164	1.0052	4.7733	2.2272	1.6204	2.2861	1.1221	1.1315	0.2767	0.8902	0.7123	0.5575	1.7047	0.8557	0.9948
835	phenylalanylglycine	Peptide	Dipeptide	41370	LC/MS Pos Early	100003588	2898	223.108	98207	721-90-4		HMDB28995	0.5007	2.0793	0.4519	0.657	0.6272	1.4917	1.4699	0.9892	3.9082	2.0425	1.248	2.3921	1.1084	1.2167	0.3117	0.9164	0.8324	0.6171	2.1547	0.9723	1.0108
1306	phosphate	Energy	Oxidative Phosphorylation	42109	LC/MS Pos Early	461	576	98.9842	1061	7664-38-2	C00009	HMDB01429	0.7179	1.0196	0.8562	0.9804	1.0551	1.2803	0.8835	1.1752	1.1242	1.0236	1.0892	1.2164	1.1247	0.9225	0.8197	0.8897	0.824	1.0447	1.2284	0.934	1.0607
1086	phosphoenolpyruvate (PEP)	Carbohydrate	Glycolysis, Gluconeogenesis, and Pyruvate Metabolism	597	LC/MS Neg	463	587.3	166.975	1005	10526-80-4	C00074	HMDB00263	0.5845	1.0371	1.9253	1.5896	1.3784	0.8098	0.6415	0.9443	0.6237	1.0063	0.9394	0.3077	0.1505	1.4985	1.7911	1.6843	1.5837	1.3275	0.9293	1.0172	0.889
1972	phosphoethanolamine (PE)	Lipid	Phospholipid Metabolism	1600	LC/MS Neg	1026	638	140.012	1015	1071-23-4	C00346	HMDB00224	0.8136	0.6623	1.0158	0.7992	0.9842	2.5876	2.641	1.617	2.0862	1.5925	2.1178	1.4988	1.7087	3.1572	0.8504	0.9626	0.9071	0.7845	1.0987	1.5826	0.8265
3937	phosphopantetheine	Cofactors and Vitamins	Pantothenate and CoA Metabolism	15504	LC/MS Neg	100000328	1597	357.089	987	NA	C01134	HMDB01416	1.1965	1.1944	1.3888	1.162	1.1371	0.3986	0.6712	0.7351	0.5211	0.7008	0.6753	0.4779	0.6867	1.2459	1.3842	1.2825	1.0422	1.3085	0.9033	1.1609	0.9578
2688	phytosphingosine	Lipid	Sphingolipid Synthesis	1510	LC/MS Pos Late	469	1367	318.3	122121	554-62-1	C12144	HMDB04610	1.3528	1.4421	1.1432	1.1637	1.0965	0.5983	0.9902	0.5041	0.7369	1.0009	0.6676	0.6385	1.0324	0.7508	1.0098	0.6719	0.9561	1.2733	0.7214	1.0272	0.9991
1493	pimelate (C7-DC)	Lipid	Fatty Acid, Dicarboxylate	15704	LC/MS Polar	100000101	2745	159.066	385	111-16-0	C02656	HMDB00857	0.8617	1.0384	1.1195	1.106	0.9729	0.6945	0.913	0.8075	1.4082	1.0485	1.5727	0.4445	0.8388	1.2345	0.7882	0.9768	1.0232	0.9371	0.7569	1.2153	0.7907
1685	pimeloylcarnitine/3-methyladipoylcarnitine (C7-DC)	Lipid	Fatty Acid Metabolism (Acyl Carnitine, Dicarboxylate)	53224	LC/MS Pos Early	100009407	2773	304.175					3.3488	0.9101	3.4801	1.2403	1.2008	0.4565	2.2969	0.6236	0.3213	0.4793	0.4418	0.2736	0.3956	3.7711	2.1242	1.2747	3.2687	4.0187	1.5402	0.8655	0.8212
122	pipecolate	Amino Acid	Lysine Metabolism	1444	LC/MS Pos Early	1025	2200	130.086	849	4043-87-2	C00408	HMDB00070	0.907	0.5929	1.1145	0.5805	0.6866	0.8557	1.1063	1.7402	1.7208	5.3527	1.483	0.5074	0.3454	1.3728	1.1062	0.6965	1.1985	0.7847	0.5082	0.5227	0.6217
442	prolylhydroxyproline	Amino Acid	Urea cycle; Arginine and Proline Metabolism	35127	LC/MS Pos Early	100001167	2128	229.118	11673055	18684-24-7		HMDB06695	1.3098	0.9959	0.5005	0.8329	1.0562	0.5005	0.8405	0.5005	0.5005	1.39	1.0041	1.4005	0.7453	0.5005	1.1965	0.8543	1.1148	1.6785	0.5005	0.5005	0.6502
425	proline	Amino Acid	Urea cycle; Arginine and Proline Metabolism	1898	LC/MS Pos Early	480	1603	116.071	145742	147-85-3	C00148	HMDB00162	0.5999	1.2682	1.1941	0.9698	1.0631	1.0945	0.6459	0.9539	1.0095	0.9744	1.0338	0.9098	0.8704	1.2338	1.307	1.2201	0.9905	0.9316	1.131	0.9531	0.9765
855	prolylglycine	Peptide	Dipeptide	40703	LC/MS Pos Early	100003674	2136	173.092	6426709	2578-57-6		HMDB11178	0.9818	1.4411	1.8167	1.3435	1.2243	1.1462	1.0182	0.771	0.6915	0.6467	0.7457	0.6099	0.8837	1.6508	1.4728	1.4466	1.1453	1.0791	0.9805	0.9695	0.8295
1591	propionylcarnitine (C3)	Lipid	Fatty Acid Metabolism (also BCAA Metabolism)	32452	LC/MS Pos Early	100001162	2590	218.139	107738	17298-37-2	C03017	HMDB00824	0.6473	0.4929	0.9641	1.0485	1.2192	0.8732	2.4446	1.3409	0.4057	1.1296	0.7307	0.3707	1.0359	2.6518	1.174	0.8879	1.9317	1.6645	1.7529	1.4696	0.6557
1592	propionylglycine (C3)	Lipid	Fatty Acid Metabolism (also BCAA Metabolism)	31932	LC/MS Polar	100001150	1502.5	130.051	98681	21709-90-0		HMDB00783	1.9538	0.9418	1.1929	1.5152	1.4007	1.1869	0.3932	1.4626	0.1874	0.2152	0.8534	0.7467	1.0145	1.5658	0.874	1.0987	0.9855	1.1008	0.6691	0.774	0.7466
3828	pseudouridine	Nucleotide	Pyrimidine Metabolism, Uracil containing	33442	LC/MS Neg	821	1100	243.062	15047	1445-07-4	C02067	HMDB00767	0.7979	0.8431	0.6899	0.8651	1.0748	1.7685	1.0535	0.4356	2.2701	2.5087	1.5324	1.5734	1.6819	1.0242	0.4356	0.5813	0.614	1.8412	0.8174	1	0.7634
3988	pterin	Cofactors and Vitamins	Pterin Metabolism	43023	LC/MS Pos Early	100004216	1805	164.057	73000	22363-60-4	C00715	HMDB00802	0.7021	1.1693	1.4964	1.0102	1.0288	0.7519	0.8371	0.9882	0.765	0.9548	1.0553	0.6662	0.7302	1.2443	1.0145	1.0048	1.3022	0.7264	0.7868	1.0001	0.9999
463	putrescine	Amino Acid	Polyamine Metabolism	1408	LC/MS Pos Early	49	3027	89.1073	1045	110-60-1	C00134	HMDB01414	0.6853	0.9675	1.079	0.6547	0.7194	1.5209	1.2535	1.5056	6.0595	4.0947	2.4981	1.2171	0.6518	1.7646	0.9918	0.7691	1.061	0.9401	1.0082	0.8057	0.8673
4039	pyridoxal	Cofactors and Vitamins	Vitamin B6 Metabolism	1651	LC/MS Pos Early	491	2343	168.065	1050	65-22-5	C00250	HMDB01545	0.8067	1.3214	1.3457	0.9695	1.0614	0.9942	1.1309	1.0907	0.5693	0.6604	0.8591	0.7611	1.8284	1.0058	1.1341	1.121	1.0247	1.3747	0.9011	0.7743	0.6602
4036	pyridoxamine	Cofactors and Vitamins	Vitamin B6 Metabolism	2150	LC/MS Pos Early	568	2975	169.097	1052	58052-48-5	C00534	HMDB01431	0.9265	1.1585	1.6495	0.7472	0.7482	1.2717	1.4637	1.5135	0.8587	0.9159	1.4765	1.0688	3.012	0.9996	0.898	1.2573	0.8043	1.3611	0.7995	1.0004	0.8322
4037	pyridoxamine phosphate	Cofactors and Vitamins	Vitamin B6 Metabolism	3138	LC/MS Pos Early	493	1932	249.064	1053	529-96-4	C00647	HMDB01555	0.8258	0.987	1.2362	0.8468	0.9122	1.0029	1.0177	1.1719	1.023	1.0406	1.0328	0.8999	0.9544	1.2992	0.9971	0.9344	1.0783	1.0089	0.9059	0.9916	1.0063
4040	pyridoxate	Cofactors and Vitamins	Vitamin B6 Metabolism	31555	LC/MS Neg	100001121	2185	182.046	6723	82-82-6	C00847	HMDB00017	1.2071	1.2308	2.1827	0.9476	0.9567	0.9513	1.012	0.7519	0.8287	0.9363	1.1992	1.0015	1.188	0.4284	1.5518	1.0383	1.0117	1.3045	1.248	0.8626	0.9032
52	pyroglutamine*	Amino Acid	Glutamate Metabolism	46225	LC/MS Pos Early	100001540	1900	129.066	134508	2353-44-8			0.9447	0.8127	0.9898	0.689	0.6026	1.04	1.3771	1.0102	0.76	1.682	1.0993	0.8321	0.3355	1.1745	2.1358	0.5862	1.1532	1.246	0.8516	0.8644	0.6708
1087	pyruvate	Carbohydrate	Glycolysis, Gluconeogenesis, and Pyruvate Metabolism	48990	LC/MS Polar	823	1083	87.0088	1060	127-17-3	C00022	HMDB00243	0.6931	1.0743	1.6184	0.9724	1.2739	0.9501	0.8694	1.0239	1.0039	0.6334	0.9377	0.9508	1.2395	1.4509	1.7748	1.2339	0.9158	1.0328	0.9937	1.1311	1.3116
3901	quinolinate	Cofactors and Vitamins	Nicotinate and Nicotinamide Metabolism	1899	LC/MS Pos Early	182	845	168.029	1066	89-00-9	C03722	HMDB00232	0.5653	0.3906	0.6722	0.3906	0.5287	0.8903	0.5565	1.1892	2.1838	0.8832	1.2031	0.7016	1.2459	0.3906	2.7731	1.3557	0.3906	0.6535	1.2642	0.3906	1.1097
4027	retinal	Cofactors and Vitamins	Vitamin A Metabolism	40807	LC/MS Pos Late	100004088	1666	285.221	638015		C00376	HMDB01358	1.0024	1.1226	0.7519	0.8334	0.904	1.5516	1.7707	1.0609	1.4565	1.8949	0.9309	1.7382	1.5207	0.7779	0.9976	0.4185	0.7499	0.4185	0.4185	0.4185	0.581
4020	retinol (Vitamin A)	Cofactors and Vitamins	Vitamin A Metabolism	1806	LC/MS Pos Late	498	1636	269.226	445354	68-26-8	C00473	HMDB00305	1.0726	1.0066	1.1613	1.1396	1.115	1.8026	1.0146	0.657	0.8537	1.891	0.7955	1.1806	0.8282	0.8631	1.2114	0.5509	0.8566	0.7294	0.7138	0.4661	0.54
1110	ribitol	Carbohydrate	Pentose Metabolism	15772	LC/MS Polar	100000406	1789.6	151.061	6912	488-81-3	C00474	HMDB00508	1.0226	1.3861	3.8326	2.1733	2.1718	0.7434	0.4556	0.4389	0.1397	0.2619	0.4322	0.1289	0.2446	2.9228	5.6245	2.4074	1.9572	1.3566	0.3187	0.9774	0.9659
3930	riboflavin (Vitamin B2)	Cofactors and Vitamins	Riboflavin Metabolism	1827	LC/MS Pos Early	500	2292	377.146	493570	83-88-5	C00255	HMDB00244	1.2618	1.1296	1.3874	0.92	0.9723	1.1465	1.556	1.086	0.4584	0.4995	0.9369	0.8713	1.1522	1.1468	1.2547	1.1362	0.9667	0.8833	1.1305	1.0277	0.9508
1109	ribose	Carbohydrate	Pentose Metabolism	1471	LC/MS Polar	914	1508.2	195.051	5779	50-69-1	C00121	HMDB00283	1.2654	1.026	1.3985	1.7284	1.524	1.425	0.5217	0.8867	0.5742	0.4267	0.8468	0.8355	3.0208	2.2279	1.1054	1.0408	1.0349	0.9265	0.83	0.7973	0.9179
1103	ribose 1-phosphate	Carbohydrate	Pentose Phosphate Pathway	1763	LC/MS Polar	219	4025	229.012	439236	50-99-7;58459-37-3	C00620	HMDB01489	0.9036	0.9542	0.7363	1.5501	1.6218	1.2562	0.662	1.0407	0.8342	0.8183	1.073	1.072	0.9996	1.2056	0.6497	1.0824	0.8806	1.0004	1.1957	0.9351	1.3276
1135	ribulonate/xylulonate/lyxonate*	Carbohydrate	Pentose Metabolism	61858	LC/MS Polar	100019968	2350	165.041					1.9725	1.0871	1.9244	1.3249	1.0147	0.5344	0.8742	0.8156	0.3085	0.5849	0.659	0.1944	0.3649	2.1103	0.9853	1.6359	1.7743	2.2849	0.8045	0.84	0.7885
1112	ribulose/xylulose	Carbohydrate	Pentose Metabolism	48340	LC/MS Polar	100006122	1400	149.046	5289590				0.9222	0.3664	1.5435	1.5586	1.5714	0.7626	0.3664	0.5878	0.3664	0.3664	0.3664	0.3664	0.4211	2.5357	0.4963	0.7948	1.5318	0.6345	0.3664	1.2305	0.3664
506	S-(1,2-dicarboxyethyl)glutathione	Amino Acid	Glutathione Metabolism	63009	LC/MS Neg	100020967	543	422.087	9802383	1115-52-2			1.5385	0.91	1.1624	0.8553	0.9388	0.9312	1.4697	1.5807	0.6425	0.6425	1.5564	0.6425	0.6425	0.8947	0.9643	1	1.0152	1.2112	0.6425	0.9892	1.0569
60	S-1-pyrroline-5-carboxylate	Amino Acid	Glutamate Metabolism	42370	LC/MS Pos Early	35	1528	114.055	1196	2906-39-0	C04322	HMDB01301	1.7662	1.4176	1.5953	1.3887	1.4161	1.522	1.035	0.5782	1.1378	1.3543	0.9188	0.7543	0.9892	1.0768	0.4645	0.7186	0.3007	0.8829	0.612	0.5277	0.4887
381	S-adenosylhomocysteine (SAH)	Amino Acid	Methionine, Cysteine, SAM and Taurine Metabolism	42382	LC/MS Neg	197	1832.4	383.114	439155	979-92-0	C00021	HMDB00939	0.9805	1.1603	1.6612	1.0175	0.9874	0.8132	0.8603	0.8185	0.6179	0.8424	0.8021	0.6201	0.7673	1.1089	1.2503	1.3712	1.0856	1.1195	0.8738	1.0126	0.877
380	S-adenosylmethionine (SAM)	Amino Acid	Methionine, Cysteine, SAM and Taurine Metabolism	15915	LC/MS Pos Early	1263	3002	399.144	34756	24346-00-7;86867-01-8;86867-0108	C00019	HMDB01185	0.5299	1.0786	1.6374	0.8459	1.0666	0.1238	0.1238	0.15	0.3758	0.8754	0.2958	0.1238	0.2879	0.9907	0.8694	1.1646	1.0832	1.478	0.7608	1.0163	1.0093
4	sarcosine	Amino Acid	Glycine, Serine and Threonine Metabolism	1516	LC/MS Pos Early	1023	1280	90.055	1088	107-97-1	C00213	HMDB00271	0.8623	1.5466	0.9974	0.9729	0.8766	1.4388	1.0052	1.3971	1.1656	0.9813	1.4175	1.1813	0.8211	1.4909	0.5151	0.697	1.0631	0.6902	1.0311	0.9333	1.0026
1501	sebacate (C10-DC)	Lipid	Fatty Acid, Dicarboxylate	32398	LC/MS Neg	100001211	1788	201.113	5192	111-20-6	C08277	HMDB00792	0.7203	0.7203	0.7699	1.0459	0.7203	1.297	0.8254	0.7203	0.7203	0.8977	0.9804	0.7203	0.7203	0.7203	0.7203	1.0537	1.1825	0.9097	1.2377	1.2657	0.8725
1134	sedoheptulose	Carbohydrate	Pentose Metabolism	53237	LC/MS Polar	100002619	2255	209.067	5459879	3019-74-7		HMDB03219	0.9897	1.4819	2.8845	1.8424	1.7888	0.4141	0.1746	0.285	0.201	0.3126	0.2933	0.1154	0.3014	2.0983	2.3698	1.4062	1.6284	1.0103	0.7499	0.974	0.8629
1105	sedoheptulose-7-phosphate	Carbohydrate	Pentose Phosphate Pathway	35649	LC/MS Neg	100001628	599.6	289.033	616	2646-35-7	C05382	HMDB01068	0.7151	1.0243	1.6846	1.2643	1.2243	0.1957	0.2068	0.3905	0.3474	0.5665	0.3715	0.1345	0.2377	1.5416	1.7689	1.24	1.352	1.1415	0.8845	1.0572	0.9757
9	serine	Amino Acid	Glycine, Serine and Threonine Metabolism	1648	LC/MS Pos Early	503	1239	106.05	5951	56-45-1	C00065	HMDB00187	0.8864	1.0609	1.1632	1.0221	1.0584	1.2534	1.2273	0.8602	1.1529	1.0038	0.9962	0.8969	0.9255	1.1992	1.0628	0.9814	0.7163	0.7457	0.7256	0.7493	0.6736
258	serotonin	Amino Acid	Tryptophan Metabolism	2342	LC/MS Pos Early	504	2550	177.102	5202	153-98-0	C00780	HMDB00259	1.8515	0.8265	0.4163	0.7151	0.4591	2.5703	1.3861	1.3143	4.6314	2.7806	2.1023	3.1191	1.3912	1.0083	0.6701	0.4163	0.5613	0.9059	1	0.5874	0.8136
493	S-methylglutathione	Amino Acid	Glutathione Metabolism	33944	LC/MS Pos Early	100001259	2200	322.107	3605667	2922-56-7	C11347		0.9926	1.2109	1.4939	1.0472	0.96	0.2715	0.0619	0.3605	0.0951	0.1313	0.3173	0.0619	0.1878	1.9026	2.2888	1.4565	1.5108	1.6488	0.8997	1.0041	1
373	S-methylmethionine	Amino Acid	Methionine, Cysteine, SAM and Taurine Metabolism	38127	LC/MS Pos Early	100002183	2555	164.074	458	3493-12-07	C05319	HMDB38670	1.1922	1.2827	1.5366	1	1.0527	0.1692	0.1692	0.1692	0.1692	0.1692	0.1692	0.1692	0.1692	0.4491	1.8686	0.8108	0.8132	0.7558	0.1944	0.4475	0.4349
469	spermidine	Amino Acid	Polyamine Metabolism	485	LC/MS Pos Early	50	3355	146.165	1102	124-20-9	C00315	HMDB01257	1.0117	0.9517	1.0815	1.3439	1.3071	1.4235	1.1035	0.7824	0.611	1.1765	0.8709	0.379	0.5847	1.8373	0.9279	1.2489	0.9061	1.5898	0.9883	0.9444	0.7941
476	spermine	Amino Acid	Polyamine Metabolism	603	LC/MS Pos Early	507	3350	203.223	1103	71-44-3	C00750	HMDB01256	0.3915	0.3809	1.2619	2.8727	3.1871	1	2.322	0.9156	0.5816	3.3308	1.283	0.318	0.318	2.053	0.8619	1.498	0.9014	1.891	0.7259	0.8188	0.4249
2687	sphingadienine	Lipid	Sphingolipid Synthesis	57426	LC/MS Pos Late	100015643	1350	298.274	6449795	25696-03-1			0.9713	1.5486	1.06	1.2066	0.938	1.3832	1.8942	0.5999	1.1761	1.7981	1.3678	1.345	1.0124	0.9876	0.8634	0.9329	0.8661	0.7598	0.9001	0.9289	0.9396
2685	sphinganine	Lipid	Sphingolipid Synthesis	17769	LC/MS Pos Late	313	1413	302.305	3126	3102-56-5	C00836	HMDB00269	0.7101	0.9297	0.8111	0.9295	0.8358	2.544	2.3066	2.172	2.0959	1.6437	2.7035	3.101	2.1456	1.3248	0.5301	0.8187	0.552	0.9893	1.1273	1.0763	1.0107
2836	sphingosine	Lipid	Sphingosines	17747	LC/MS Pos Late	297	1393	300.29	5353955	123-78-4	C00319	HMDB00252	0.7487	1.351	0.9096	0.9488	0.8283	1.9605	2.2093	0.9989	1.8941	1.9633	1.7291	1.851	1.5792	0.8835	0.7199	1.0194	0.7958	0.9825	1.0742	1.2354	0.9676
4526	stachydrine	Xenobiotics	Food Component/Plant	34384	LC/MS Pos Early	100001296	1440	144.102	115244	4136-37-2	C10172	HMDB04827	1.7375	1.23	1.8615	0.8111	0.7911	0.2177	0.349	0.0919	0.6015	1.0191	0.5493	0.1107	0.0989	0.9809	1.4482	0.4273	1.8975	2.2247	1.5044	0.7641	1.1556
1341	stearate (18:0)	Lipid	Long Chain Saturated Fatty Acid	1358	LC/MS Neg	439	5872	283.264	5281	57-11-4	C01530	HMDB00827	0.9878	1.0552	1.0204	0.9183	1.046	2.3362	1.2326	0.9811	1.0811	0.8198	0.9717	1.0122	1.76	1.8924	0.8557	0.8163	0.7731	0.9538	1.0288	0.8807	1.4149
1380	stearidonate (18:4n3)	Lipid	Long Chain Polyunsaturated Fatty Acid (n3 and n6)	33969	LC/MS Neg	100001229	5395	275.202	5312508	111174-40-4	C16300	HMDB06547	1.4053	0.7789	0.9747	1.2363	0.983	2.8534	0.4921	0.8745	1.5919	0.4817	1.239	1.0495	2.3032	1.8965	0.7557	0.9961	0.4732	0.6073	0.6049	1.2776	1.5389
1645	stearoylcarnitine (C18)	Lipid	Fatty Acid Metabolism (Acyl Carnitine, Long Chain Saturated)	34409	LC/MS Pos Late	100001391	1485	428.373	6426855	18822-91-8		HMDB00848	0.7846	0.4806	1.0735	0.586	0.4937	1.6904	1.4195	1.2555	0.9456	0.7723	1.4322	1.0139	1.1503	1.5615	1.1247	1.5115	0.7948	1.449	0.9861	1.1374	0.7674
1716	stearoylcholine*	Lipid	Fatty Acid Metabolism (Acyl Choline)	57464	LC/MS Pos Late	100015759	1520	370.368					0.5139	0.2668	2.0609	0.673	0.5861	1.4573	2.7961	1.4404	0.2668	0.2668	1.2491	1.0258	2.2693	3.2884	1.8491	0.9374	0.7932	0.673	0.9742	0.7057	0.7522
1496	suberate (C8-DC)	Lipid	Fatty Acid, Dicarboxylate	15730	LC/MS Polar	100000016	2577.6	173.082	10457	505-48-6	C08278	HMDB00893	0.6909	1.2204	1.072	0.965	0.8373	1.0487	0.8805	0.779	1.3575	0.973	1.3326	0.6091	0.7856	1.027	0.5812	0.9198	1.1099	0.8465	0.9379	1.0668	1.0981
1288	succinate	Energy	TCA Cycle	1437	LC/MS Polar	252	3149	117.019	1110	110-15-6	C00042	HMDB00254	0.924	1.0781	0.8465	0.6936	1.1062	0.8746	0.9457	1.0248	0.9087	1.0935	1.1932	0.8313	1.0405	0.6476	1.453	0.9058	1.3664	1.2552	0.9752	0.6853	0.807
1287	succinylcarnitine (C4)	Energy	TCA Cycle	37058	LC/MS Pos Early	100001948	2291	262.128	71464481	256928-74-2		HMDB61717	0.983	1.3981	1.017	0.7713	0.8127	0.961	0.6321	1.1411	0.5109	0.5109	0.5115	0.5109	0.6526	1.971	1.8085	1.3429	2.2865	2.0914	1.1905	0.8108	0.6982
1170	sucrose	Carbohydrate	Disaccharides and Oligosaccharides	1519	LC/MS Polar	935	3092	387.114	5988	57-50-1	C00089	HMDB00258	1.5034	0.1927	0.5294	0.1927	0.7635	0.1927	0.1927	0.1927	0.1927	0.9428	0.1927	0.1927	0.5841	0.1927	0.1927	0.1927	3.0688	1.8813	1.3854	0.1927	1
5194	sulfate*	Xenobiotics	Chemical	46960	LC/MS Neg	100002528	616	96.9601	1118	14808-79-8	C00059	HMDB01448	1.006	1.1686	2.0086	0.9601	0.9235	1.3608	0.9036	0.8453	1.1872	1.5774	1.4517	1.5373	0.994	0.7561	1.1007	0.9737	1.1387	1.1146	1.1538	0.9043	0.9451
405	taurine	Amino Acid	Methionine, Cysteine, SAM and Taurine Metabolism	2125	LC/MS Neg	512	690	124.007	1123	107-35-7	C00245	HMDB00251	1.1953	1.1122	1.6187	0.9292	0.8715	0.5986	0.9015	0.5697	0.3936	0.9633	0.5605	0.3175	0.4114	2.6018	2.2768	1.8683	1.8611	1.5237	0.9601	1.5264	1.1413
3088	tauro-alpha-muricholate	Lipid	Primary Bile Acid Metabolism	42605	LC/MS Neg	100004064	4745	514.284					0.9913	1.5518	1.1225	1.65	1.6334	1.6535	0.912	0.4454	0.2312	0.8292	0.3259	0.2295	0.3554	3.0585	1.0159	1.2456	0.9971	0.63	1.9081	1.0029	0.8027
3089	tauro-beta-muricholate	Lipid	Primary Bile Acid Metabolism	33983	LC/MS Neg	100001250	4774	514.284	168408	25696-60-0		HMDB00932	1.0693	1.2348	1.0485	2.1846	2.1382	0.2524	0.6768	0.317	0.2111	0.6632	0.2135	0.2611	0.2049	2.6012	1.3063	0.8339	1.1248	0.9515	3.0922	1.2969	1.1018
3085	taurochenodeoxycholate	Lipid	Primary Bile Acid Metabolism	18494	LC/MS Neg	1629	5250	498.289	387316	6009-98-9	C05465	HMDB00951	1.0894	1.2393	0.528	0.8393	0.9406	2.2532	1.2846	0.4387	0.7538	1.1241	0.7429	1.0108	1.3786	2.2059	0.6013	1.031	0.5479	0.8263	1.4577	0.9892	0.9533
3158	taurochenodeoxycholic acid (7 or 24)-sulfate	Lipid	Secondary Bile Acid Metabolism	52976	LC/MS Neg	100006643	4928	288.62					1.2479	0.8876	1	0.9036	0.8409	0.6602	0.2881	0.2881	0.2881	0.7003	0.2881	0.2881	0.2881	0.8737	1.0629	1.2176	1.5497	1.4715	0.6138	0.9221	1.0848
3078	taurocholate	Lipid	Primary Bile Acid Metabolism	18497	LC/MS Neg	1648	5150	514.284	6675	145-42-6	C05122	HMDB00036	0.7712	1.939	1.8963	0.9915	1.0253	1.9229	1.2752	0.4081	0.1966	0.6439	0.2445	0.2222	0.3766	2.6833	1.1002	1.3997	0.6342	0.5632	1.4818	1.191	0.7651
3108	taurodeoxycholate	Lipid	Secondary Bile Acid Metabolism	12261	LC/MS Neg	1668	5257.4	498.289	2733768	207737-97-1	C05463	HMDB00896	1.5537	1.4751	1.5898	1.3314	1.2131	1.5289	1.5027	0.2746	0.9247	1.299	0.9106	0.8155	0.597	1.2287	0.4534	0.4595	0.3516	0.3168	0.547	0.7497	0.7087
3143	taurohyocholate*	Lipid	Secondary Bile Acid Metabolism	42603	LC/MS Neg	100004084	5000	514.284					0.4374	0.4374	2.2169	0.9818	1.0314	1.3152	0.5212	0.4374	0.4374	0.4374	0.4374	0.4374	0.4374	1.6721	0.7872	0.6943	0.4374	0.4374	0.6479	0.4374	0.4374
3145	taurohyodeoxycholic acid	Lipid	Secondary Bile Acid Metabolism	43588	LC/MS Neg	100003869	5073	498.289	119046	38411-85-7			0.6582	1.3123	1.9573	1.4523	1.3712	0.9951	0.1408	0.1408	0.1408	0.1772	0.1408	0.1408	0.1408	1.943	0.4249	1.0049	0.7041	0.3548	2.128	0.8014	0.1408
3119	taurolithocholate	Lipid	Secondary Bile Acid Metabolism	31889	LC/MS Neg	100001065	5345	482.295	10595	516-90-5	C02592	HMDB00722	1	1.3553	0.463	0.463	0.6526	1.6411	0.463	0.463	0.463	0.8411	0.7832	0.696	1.5111	1.8921	0.6054	0.6511	0.463	0.5822	0.463	0.463	1.2146
3134	tauroursodeoxycholate	Lipid	Secondary Bile Acid Metabolism	39378	LC/MS Neg	100002912	5025	498.289	9848818	14605-22-2		HMDB00874	1.3438	1.3616	1.0062	1.4919	1.4598	0.9339	1.3608	0.3207	0.1786	0.5421	0.4262	0.3341	0.3873	2.6229	0.9938	1.1476	0.8623	0.5803	1.4989	1.2723	1.0276
1373	tetradecadienoate (14:2)*	Lipid	Long Chain Polyunsaturated Fatty Acid (n3 and n6)	62850	LC/MS Neg	100020343	5292	223.17	5312409	39039-37-7		HMDB00560	0.5259	0.5851	1.1057	0.6731	0.916	1.6735	0.9588	1.3388	1.7619	1.049	1.6097	0.8229	1.8536	2.2556	0.6465	1.0412	0.6029	0.8792	0.7583	1.3236	1.8959
4012	thiamin (Vitamin B1)	Cofactors and Vitamins	Thiamine Metabolism	5341	LC/MS Pos Early	873	3050	265.112	1130	59-43-8	C00378	HMDB00235	0.8539	0.9559	2.1147	1.1719	1.2194	0.5625	1.0441	0.8097	0.3929	0.7284	0.646	0.5518	0.4821	1.4526	1.883	1.2911	1.7599	1.2525	0.7978	0.712	0.6829
4013	thiamin monophosphate	Cofactors and Vitamins	Thiamine Metabolism	15798	LC/MS Pos Early	523	2378	345.078	3382778	532-40-1	C01081	HMDB02666	1.0549	1.1363	1.2242	1.0182	0.9818	0.7092	0.857	0.7432	0.4639	0.645	0.616	0.6185	0.7364	1.1119	1.1622	1.0356	1.1641	1.1053	0.9372	0.9109	0.837
5335	thioproline	Xenobiotics	Chemical	53231	LC/MS Pos Early	100009232	1250	134.027	93176	34592-47-4			0.8685	1.2541	1.4747	0.8918	0.9865	1.0601	1.0439	0.88	1.1264	1.1664	1.3307	1.0516	1.0276	0.8462	0.855	0.7878	0.7293	0.9091	0.8736	1.0135	0.7315
3949	threonate	Cofactors and Vitamins	Ascorbate and Aldarate Metabolism	27738	LC/MS Polar	100001022	2384	135.03	151152	70753-61-6	C01620	HMDB00943	1.1014	0.9887	1.327	1.029	0.9018	0.3942	0.6125	0.5339	0.3768	0.6528	0.4935	0.2945	0.2657	1.5066	1.6354	1.3289	1.4537	1.4029	0.8224	1.0113	0.7689
16	threonine	Amino Acid	Glycine, Serine and Threonine Metabolism	1284	LC/MS Pos Early	564	1514	120.066	6288	72-19-5	C00188	HMDB00167	0.8824	1.0539	1.4305	1.0072	1.0438	1.0642	1.0877	0.7588	0.9349	0.9928	0.9178	0.7239	0.8263	1.144	1.1075	1.0596	0.8094	0.8429	0.7034	0.7426	0.6927
3878	thymidine	Nucleotide	Pyrimidine Metabolism, Thymine containing	2183	LC/MS Neg	872	1963.7	241.083	5789	50-89-5	C00214	HMDB00273	0.8779	0.7523	0.9351	1.1158	1.7562	1.5814	0.6456	0.4463	1.7389	1.1419	1.0225	0.8772	1.4255	1	1.3301	0.8986	0.8894	0.8329	0.7203	0.8849	1.3441
341	tiglyl carnitine (C5)	Amino Acid	Leucine, Isoleucine and Valine Metabolism	35428	LC/MS Pos Early	100001597	2962	244.154	22833596	64191-86-2		HMDB02366	1.0393	0.7917	0.6261	2.8131	0.9671	0.6261	0.6261	0.6261	0.6261	0.6261	0.848	0.6261	0.6261	0.6261	0.6261	0.6261	0.9071	1.9448	0.6261	0.6261	0.6261
440	hydroxyproline	Amino Acid	Urea cycle; Arginine and Proline Metabolism	32306	LC/MS Pos Early	1001	1064	132.065	5810	51-35-4	C01157	HMDB00725	1.3117	0.7786	0.8321	0.6233	0.5614	1.0693	1	0.4141	1.1057	1.4237	0.6027	1.4457	0.619	1.7203	1.4767	0.679	1.1491	1.2472	0.8333	1.0783	0.9205
3922	trigonelline (N'-methylnicotinate)	Cofactors and Vitamins	Nicotinate and Nicotinamide Metabolism	32401	LC/MS Pos Early	100001092	1388	138.055	5570	535-83-1	C01004	HMDB00875	2.5813	1.3483	2.3907	0.7637	0.7413	0.119	0.3276	0.0418	0.1967	0.6278	0.1757	0.0677	0.0598	1.2041	2.1763	0.347	2.0123	2.3309	1.2428	1.0473	0.9527
1977	trimethylamine N-oxide	Lipid	Phospholipid Metabolism	40406	LC/MS Pos Early	100003397	2100	76.0757	1145	1184-78-7	C01104	HMDB00925	1.9127	1.4772	0.3809	0.9835	0.8175	0.9838	0.3809	0.3809	1.3199	2.7918	0.3809	0.3809	0.3809	0.5507	0.8753	0.6785	1.3724	3.9923	1.2823	0.8052	0.9582
228	tryptophan	Amino Acid	Tryptophan Metabolism	54	LC/MS Pos Early	565	2986	205.097	6305	73-22-3	C00078	HMDB00929	0.9907	1.1121	1.3465	1.1879	1.195	1.2695	1.352	0.8799	1.002	1.2061	1.0959	0.9218	0.9368	1.2173	0.9599	0.998	0.7208	0.9672	0.8343	0.8468	0.7187
904	tryptophylglycine	Peptide	Dipeptide	43028	LC/MS Pos Early	100003609	2930	262.119	263471	7360-09-0		HMDB29083	0.1964	1.1548	0.1964	0.1964	0.3569	1.1559	1.2905	0.5766	3.6432	1.5797	0.9636	2.2539	0.5842	1	0.1964	0.4764	0.1964	0.1964	1.3962	0.5534	0.5051
151	tyrosine	Amino Acid	Tyrosine Metabolism	1299	LC/MS Pos Early	815	2430	182.081	6057	60-18-4	C00082	HMDB00158	0.8836	1.0714	1.602	0.9339	0.9381	1.3063	1.1271	0.8425	1.1346	1.2776	0.828	0.795	0.8405	1.2627	1.0876	1.0223	0.8167	1.0322	0.9777	0.7989	0.899
920	tyrosylglycine	Peptide	Dipeptide	41375	LC/MS Neg	100003598	1635	237.088	259323	673-05-5		HMDB29105	0.6363	1.7294	0.7327	0.7204	0.438	1.536	2.3841	1.5896	4.035	2.6736	2.172	2.3802	0.9541	0.9823	0.4634	1.1049	1.0177	0.7848	1.7149	0.9641	0.1277
1226	UDP-galactose	Carbohydrate	Nucleotide Sugar	15860	LC/MS Polar	100000298	4000	565.048	18068	2956-16-3;91183-98-1;137868-52-1	C00052	HMDB00302	0.4975	0.732	1.4057	1.4366	1.496	0.7952	1.0564	1.4445	0.3897	0.478	1.5337	0.7443	0.5298	1.3786	1.3106	1.5286	1.495	1.3956	0.461	0.7295	1.1336
1222	UDP-glucose	Carbohydrate	Nucleotide Sugar	32344	LC/MS Polar	1096	3950	565.048	8629	117756-22-6	C00029	HMDB00286	0.559	1.7336	1.2373	1.2177	1.0783	0.1905	0.5861	0.4276	1.4351	1.2354	0.8191	0.3112	0.1803	0.6719	1.0243	1.3359	1.4872	1.6427	1.0905	0.8998	1.183
1227	UDP-glucuronate	Carbohydrate	Nucleotide Sugar	2763	LC/MS Neg	1097	588	579.027	17473	28053-08-9;63700-19-6	C00167	HMDB00935	0.4078	0.4078	0.4078	0.4078	0.4078	0.4078	0.4078	0.4407	2.8374	3.1635	2.1805	0.4078	0.4078	0.4078	0.4078	0.4078	1	0.6427	0.4078	0.4078	0.4078
1234	UDP-N-acetylglucosamine/galactosamine	Carbohydrate	Nucleotide Sugar	46148	LC/MS Neg	100002957	646	606.074					0.6867	1.3246	0.8256	0.9121	1.6184	0.3661	0.4771	0.8125	1.6773	1.5778	1.4648	0.9197	0.3222	3.1048	2.2235	1.3243	3.0485	0.8375	0.5884	1.2408	0.7118
1503	undecanedioate (C11-DC)	Lipid	Fatty Acid, Dicarboxylate	42395	LC/MS Neg	100001617	2440	215.129	15816	1852-04-6		HMDB00888	1.0372	1.4817	0.9995	0.453	1.064	0.4233	1.1537	0.7472	1.0798	0.7072	1.0446	1.0005	1.0221	0.8873	0.6499	0.7786	0.8103	1.2366	1.3564	0.4622	1.1382
3827	uracil	Nucleotide	Pyrimidine Metabolism, Uracil containing	605	LC/MS Polar	825	1089.7	111.02	1174	66-22-8	C00106	HMDB00300	1.3118	0.6622	2.4846	1.1208	1.0824	2.5927	1.0079	0.8578	1.4019	2.5372	1.6855	1.3163	1.5925	0.7146	0.4398	0.9556	0.8577	0.7309	0.9921	0.587	0.8901
415	urea	Amino Acid	Urea cycle; Arginine and Proline Metabolism	1670	LC/MS Pos Early	533	700	121.072	1176	57-13-6	C00086	HMDB00294	0.8375	0.9611	1.1632	0.866	0.8749	1.5684	1.511	1.1136	1.1893	0.8847	1.4116	1.1654	1.0768	0.9862	0.8881	1.1092	0.5888	2.869	0.6516	0.7654	0.602
3826	uridine	Nucleotide	Pyrimidine Metabolism, Uracil containing	606	LC/MS Neg	535	1457.6	243.062	6029	58-96-8	C00299	HMDB00296	1.2133	1.1906	0.9175	1.4919	1.5862	1.0491	0.8448	0.7992	0.659	0.7818	0.8877	0.9837	1.0877	1.1311	1.1154	1.1994	0.7349	0.9816	1.0393	0.8527	1.0163
3821	UMP	Nucleotide	Pyrimidine Metabolism, Uracil containing	2856	LC/MS Neg	869	627	323.029	6030	3387-36-8	C00105	HMDB00288	1.0064	1.2473	1.6046	0.9936	0.7915	0.6643	0.9809	1.2092	0.721	0.7279	0.9783	0.4229	0.4927	1.3741	1.5614	1.3018	1.298	1.3936	0.9877	1.3093	0.8675
3162	ursocholate	Lipid	Secondary Bile Acid Metabolism	57573	LC/MS Neg	100002913	4648	407.28		2955-27-3			1	0.6451	0.7938	0.7349	0.6451	0.6451	0.6451	0.6451	0.6451	0.6451	0.6451	0.6451	0.6451	0.6451	0.6451	0.6451	0.6451	0.6451	0.6451	0.6451	0.6451
3122	ursodeoxycholate	Lipid	Secondary Bile Acid Metabolism	1605	LC/MS Neg	1135	5055	391.285	31401	128-13-2	C07880	HMDB00946	1.1731	1.1015	1.6472	1.4148	1.2333	0.9134	2.666	0.3066	0.2553	0.2553	0.2949	0.3625	0.398	3.6568	1.2192	1.2585	0.5671	0.3415	1	1.1349	0.7768
353	valine	Amino Acid	Leucine, Isoleucine and Valine Metabolism	1649	LC/MS Pos Early	566	2479	118.086	6287	72-18-4	C00183	HMDB00883	0.9322	1.1289	1.3356	0.9619	0.994	1.0725	1.1884	0.7677	1.0862	1.0521	1.0977	0.7875	0.8296	1.0766	0.9785	1.0318	0.6995	0.7691	0.6872	0.741	0.6485
937	valylglutamine	Peptide	Dipeptide	42079	LC/MS Pos Early	100003640	2295	246.145	5253209	42854-54-6		HMDB29125	0.9643	1.9804	0.6969	0.9486	0.7096	1.4325	2.0938	1.559	6.3823	3.5794	2.6908	4.8383	2.3983	0.8549	0.2393	1.0092	0.5917	0.6305	2.0064	0.9908	0.8561
938	valylglycine	Peptide	Dipeptide	40475	LC/MS Pos Early	100003641	2444	175.108	136487	686-43-1		HMDB29127	0.6799	1.8762	0.6638	0.7331	0.6481	1.3126	1.421	1.1387	2.5763	1.7844	1.1416	1.9229	1.3797	0.9562	0.2932	0.8591	0.7409	0.7411	2.0477	1.0221	0.9779
3734	xanthine	Nucleotide	Purine Metabolism, (Hypo)Xanthine/Inosine containing	3147	LC/MS Polar	1004	2023	151.026	1188	69-89-6	C00385	HMDB00292	1.0728	1.1373	0.9633	1.2369	1.2805	1.3651	0.7101	0.8942	0.8535	0.9119	1.0028	1.0239	1.0741	1.0739	0.8955	0.9972	0.6714	0.9613	1.0075	0.907	1.0394
3736	xanthosine	Nucleotide	Purine Metabolism, (Hypo)Xanthine/Inosine containing	15136	LC/MS Neg	100000299	1075	283.068	64959	146-80-5	C01762	HMDB00299	0.432	1.0186	1.2183	0.8145	1.1421	1.163	0.4237	0.516	0.121	0.2294	0.373	0.2316	1.0368	1.6344	1.1067	1.3809	1.065	0.709	0.8377	0.9284	1.4909

## Sheet: PathwayHeatMap
	Wake Forest University- WAKE-0204-18VWCLP Sepsis Hepatocyte Study
	Heat map of statistically significant biochemicals profiled in this study.
											Fold of Change				Statistical Values							Mean Values				% Filled Values
											Welch's Two-Sample t-Test				Welch's Two-Sample t-Test
											CLP PBS	CLP DCA	CLP DCA		CLP PBS		CLP DCA		CLP DCA			NONE	CLP PBS	CLP DCA		NONE	CLP PBS	CLP DCA		Super Pathway	Sub Pathway	Chemical ID	CAS	RI	Mass
															None		None		CLP PBS
	Pathway Sort Order	Super Pathway	Sub Pathway	Biochemical Name	Platform	Comp ID	KEGG	HMDB	PUBCHEM	X	None	None	CLP PBS	X	p-value	q-value	p-value	q-value	p-value	q-value	X				X				X
	1	Amino Acid	Glycine, Serine and Threonine Metabolism	glycine	LC/MS pos early	58	C00037	HMDB00123	750		0.7	0.86	1.23		0.002	0.0045	0.1639	0.3209	0.0831	0.0603		1.1614	0.8177	1.0025		100	100	100		Amino Acid	Glycine, Serine and Threonine Metabolism	340	56-40-6	1375	76.0393
	2			N-acetylglycine	LC/MS pos early	27710		HMDB00532	10972		1.08	1.42	1.32		0.7356	0.3722	0.0572	0.1793	0.1263	0.0849		0.8685	0.9387	1.2362		100	100	100		Amino Acid	Glycine, Serine and Threonine Metabolism	100001006	543-24-8	826	118.05
	4			sarcosine	LC/MS pos early	1516	C00213	HMDB00271	1088		1.18	0.93	0.79		0.1853	0.1332	0.6668	0.6495	0.0766	0.0571		0.9986	1.176	0.9279		100	100	100		Amino Acid	Glycine, Serine and Threonine Metabolism	1023	107-97-1	1280	90.055
	5			dimethylglycine	LC/MS pos early	5086	C01026	HMDB00092	673		0.77	1.55	2		0.1413	0.1083	0.0016	0.0232	0.0028	0.0052		0.8999	0.6965	1.3942		100	100	100		Amino Acid	Glycine, Serine and Threonine Metabolism	806	1118-68-9	1104	104.071
	6			betaine	LC/MS pos early	3141	C00719	HMDB00043	247		0.71	0.92	1.29		0.0145	0.0189	0.588	0.613	0.0052	0.0082		1.1717	0.8359	1.0798		100	100	100		Amino Acid	Glycine, Serine and Threonine Metabolism	799	107-43-7	1064	118.086
	7			betaine aldehyde	LC/MS pos early	15499	C00576	HMDB01252	249		0.93	0.55	0.59		0.7841	0.392	0.1745	0.3315	0.0376	0.0333		1.256	1.1728	0.6958		100	100	100		Amino Acid	Glycine, Serine and Threonine Metabolism	1219	7758-31-8	1915	120.102
	9			serine	LC/MS pos early	1648	C00065	HMDB00187	5951		0.98	0.81	0.82		0.7365	0.3722	0.0249	0.1164	0.0453	0.0387		1.0612	1.0395	0.8567		100	100	100		Amino Acid	Glycine, Serine and Threonine Metabolism	503	56-45-1	1239	106.05
	10			N-acetylserine	LC/MS pos early	37076		HMDB02931	65249		1	0.85	0.85		0.9361	0.4458	0.0457	0.1548	0.1278	0.0855		1.0501	1.0541	0.893		100	100	100		Amino Acid	Glycine, Serine and Threonine Metabolism	100001851	97-14-3	800	148.06
	16			threonine	LC/MS pos early	1284	C00188	HMDB00167	6288		0.83	0.81	0.97		0.0249	0.0281	0.0272	0.119	0.6852	0.3273		1.1002	0.9133	0.8878		100	100	100		Amino Acid	Glycine, Serine and Threonine Metabolism	564	72-19-5	1514	120.066
	17			N-acetylthreonine	LC/MS neg	33939		HMDB62557	152204		0.79	1	1.27		0.1842	0.1329	0.8592	0.7252	0.1035	0.0725		1.054	0.8356	1.0572		100	100	100		Amino Acid	Glycine, Serine and Threonine Metabolism	100001274	17093-74-2	821.6	160.062
	28		Alanine and Aspartate Metabolism	alanine	LC/MS pos early	1126	C00041	HMDB00161	5950		0.92	0.69	0.75		0.3054	0.193	0.0014	0.0232	0.0082	0.0113		1.1344	1.0402	0.7826		100	100	100		Amino Acid	Alanine and Aspartate Metabolism	811	56-41-7	1700	90.055
	30			N-acetylalanine	LC/MS neg	1585	C02847	HMDB00766	88064		1.22	1.06	0.87		0.0463	0.0446	0.8168	0.7132	0.198	0.1221		0.9071	1.1024	0.9577		100	100	100		Amino Acid	Alanine and Aspartate Metabolism	1110	97-69-8	861	130.051
	35			aspartate	LC/MS pos early	443	C00049	HMDB00191	5960		0.82	0.89	1.09		0.0713	0.062	0.2789	0.4446	0.4249	0.2273		1.1523	0.9476	1.0303		100	100	100		Amino Acid	Alanine and Aspartate Metabolism	234	56-84-8	1165	134.045
	36			N-acetylaspartate (NAA)	LC/MS polar	22185	C01042	HMDB00812	65065		1.19	1.17	0.98		0.4354	0.2539	0.6116	0.6166	0.8227	0.3697		1.0234	1.2201	1.1933		100	100	100		Amino Acid	Alanine and Aspartate Metabolism	100000787	997-55-7;997-55-7	3143	174.041
	39			asparagine	LC/MS pos early	512	C00152	HMDB00168	6267		0.92	1.06	1.16		0.4412	0.2561	0.4358	0.5262	0.1058	0.0738		1.0066	0.9227	1.0695		100	100	100		Amino Acid	Alanine and Aspartate Metabolism	917	70-47-3	1225	133.061
	40			N-acetylasparagine	LC/MS pos early	33942		HMDB06028	99715		0.92	0.95	1.03		0.4657	0.2683	0.622	0.6191	0.8193	0.369		1.0762	0.9924	1.0247		100	100	100		Amino Acid	Alanine and Aspartate Metabolism	100001257	4033-40-3	785	175.071
	42		Glutamate Metabolism	glutamate	LC/MS pos early	57	C00025	HMDB00148	611		0.99	0.78	0.79		0.8494	0.4167	0.007	0.0494	0.0113	0.0143		1.0601	1.0479	0.8267		100	100	100		Amino Acid	Glutamate Metabolism	561	56-86-0	1500	148.06
	43			glutamine	LC/MS pos early	53	C00064	HMDB00641	5961		0.84	0.78	0.93		0.1186	0.0937	0.0271	0.119	0.4368	0.2326		1.1291	0.9466	0.8759		100	100	100		Amino Acid	Glutamate Metabolism	563	56-85-9	1291	147.076
	44			alpha-ketoglutaramate*	LC/MS polar	62101					0.88	0.81	0.93		0.2536	0.1656	0.1213	0.2744	0.9218	0.3952		1.1956	1.0486	0.9724		100	100	100		Amino Acid	Glutamate Metabolism	100002397	18465-19-5	1916	144.03
	45			N-acetylglutamate	LC/MS pos early	15720	C00624	HMDB01138	70914		1.16	1.36	1.17		0.1538	0.1152	0.0018	0.0234	0.0653	0.0505		0.8505	0.9854	1.1574		100	100	100		Amino Acid	Glutamate Metabolism	100000282	5817-08-03	1050	190.071
	46			N-acetylglutamine	LC/MS pos early	33943	C02716	HMDB06029	182230		1	1.06	1.06		0.9658	0.4502	0.6422	0.6336	0.6309	0.3068		1.1208	1.1206	1.1885		100	100	100		Amino Acid	Glutamate Metabolism	100001253	2490-97-3	845	189.087
	48			4-hydroxyglutamate	LC/MS pos early	40499	C03079	HMDB01344	439902		0.74	1.46	1.98		0.243	0.1596	0.1676	0.3249	0.0181	0.02		1.0286	0.7602	1.5021		100	63	100		Amino Acid	Glutamate Metabolism	100002544	2485-33-8	1141	164.055
	51			glutamate, gamma-methyl ester	LC/MS pos early	33487		HMDB61715	68662		0.62	1.31	2.1		0.0602	0.0551	0.1823	0.3364	0.0007	0.0024		1.195	0.7459	1.5698		100	100	100		Amino Acid	Glutamate Metabolism	100001103	1499-55-4;1499-55-4	2170	162.076
	52			pyroglutamine*	LC/MS pos early	46225			134508		0.95	1.01	1.07		0.7106	0.363	0.977	0.7522	0.7392	0.3461		1.0727	1.0171	1.0853		100	100	100		Amino Acid	Glutamate Metabolism	100001540	2353-44-8	1900	129.066
	57			N-methyl-GABA	LC/MS pos early	39577	C15987		70703		0.3	0.84	2.84		0.0006	0.0018	0.4146	0.5159	0.0028	0.0052		1.6436	0.4869	1.383		100	100	100		Amino Acid	Glutamate Metabolism	100003152	1119-48-8	2109	118.086
	60			S-1-pyrroline-5-carboxylate	LC/MS pos early	42370	C04322	HMDB01301	1196		0.73	0.45	0.61		0.151	0.115	0.0017	0.0232	0.0123	0.0148		1.4201	1.0362	0.634		100	100	100		Amino Acid	Glutamate Metabolism	35	2906-39-0	1528	114.055
	66		Histidine Metabolism	histidine	LC/MS pos early	59	C00135	HMDB00177	6274		0.91	0.78	0.86		0.2725	0.1765	0.0162	0.0854	0.0872	0.0629		1.112	1.015	0.8682		100	100	100		Amino Acid	Histidine Metabolism	355	5934-29-2	2707	156.077
	67			1-methylhistidine	LC/MS pos early	30460	C01152	HMDB00001	92105		2.35	2.1	0.89		0.1136	0.0915	0.0002	0.0094	0.5869	0.2907		0.6379	1.4973	1.3389		100	75	100		Amino Acid	Histidine Metabolism	100001051	332-80-9	2755	170.092
	68			3-methylhistidine	LC/MS pos early	15677	C01152	HMDB00479	64969		2	0.79	0.4		0.0596	0.0549	0.4039	0.5124	0.014	0.0166		1.0801	2.165	0.8567		88	100	88		Amino Acid	Histidine Metabolism	100000042	368-16-1	2670	170.092
	69			N-acetylhistidine	LC/MS pos early	33946	C02997	HMDB32055	75619		0.7	1.16	1.66		0.0783	0.0667	0.3648	0.4938	0.0333	0.0313		1.0861	0.7592	1.2592		100	100	100		Amino Acid	Histidine Metabolism	100001293	39145-52-3	2065	198.087
	71			N-acetyl-1-methylhistidine*	LC/MS pos early	43255			193270		1.99	1.86	0.94		0.0445	0.0435	0.0007	0.0204	0.8014	0.3645		0.6525	1.2975	1.215		100	88	100		Amino Acid	Histidine Metabolism	100004299		2100	212.103
	75			imidazole propionate	LC/MS pos early	40730		HMDB02271	70630		0.55	0.69	1.25		0.1774	0.1292	0.4764	0.5535	0.3447	0.1906		1.4099	0.7766	0.9669		100	100	100		Amino Acid	Histidine Metabolism	100003434	1074-59-5	2263	141.066
	76			formiminoglutamate	LC/MS pos early	43493	C00439	HMDB00854	439233		1.36	0.63	0.46		0.5511	0.3062	0.1258	0.2763	0.0659	0.0508		1.0492	1.4265	0.6633		100	88	75		Amino Acid	Histidine Metabolism	100002500	816-90-0	1880	175.071
	77			imidazole lactate	LC/MS pos early	15716	C05568	HMDB02320	440129		1.66	0.9	0.54		0.9763	0.4517	0.6122	0.6166	0.8112	0.3661		1.1586	1.9283	1.0397		100	100	100		Amino Acid	Histidine Metabolism	100000263	14403-45-3	2040	157.061
	81			anserine	LC/MS pos early	15747	C01262	HMDB00194	112072		0.54	0.98	1.83		0.0048	0.0088	0.9525	0.7499	0.0049	0.008		1.0445	0.5623	1.0272		100	50	100		Amino Acid	Histidine Metabolism	100000044	10030-52-1	2924	241.13
	84			1-methylhistamine	LC/MS pos early	43831	C05127	HMDB00898	3614		3.9	1	0.26		0.0045	0.0085			0.0045	0.0075		0.3851	1.5027	0.3851		13	88	0		Amino Acid	Histidine Metabolism	100001204	501-75-7	3040	126.103
	85			1-methyl-4-imidazoleacetate	LC/MS pos early	32350	C05828	HMDB02820	75810		3.4	1.36	0.4		0.0073	0.0116	0.0013	0.0232	0.038	0.0335		0.755	2.5651	1.0277		100	100	100		Amino Acid	Histidine Metabolism	100001208	2625-49-2	2064	141.066
	86			1-methyl-5-imidazoleacetate	LC/MS pos early	62946		HMDB04988	6451814		2.36	1.42	0.6		0.0241	0.0276	0.298	0.4627	0.1362	0.0896		0.7134	1.6853	1.013		50	63	63		Amino Acid	Histidine Metabolism	100002910	4200-48-0	1989	141.066
	88			1-ribosyl-imidazoleacetate*	LC/MS pos early	61868	C05131	HMDB02331	5117448		0.9	0.79	0.89		0.3879	0.2353	0.3668	0.4938	0.7509	0.35		1.1521	1.034	0.9158		100	100	100		Amino Acid	Histidine Metabolism	100001668	29605-99-0	2006	259.092
	89			4-imidazoleacetate	LC/MS pos early	32349	C02835	HMDB02024	96215		0.81	0.83	1.02		0.1297	0.1007	0.1372	0.2891	0.7383	0.3461		1.2014	0.9761	0.9912		100	100	100		Amino Acid	Histidine Metabolism	100001207	645-65-8	2055	127.05
	97		Lysine Metabolism	lysine	LC/MS pos early	1301	C00047	HMDB00182	5962		0.8	0.84	1.04		0.0119	0.0162	0.0525	0.1702	0.6672	0.3201		1.1661	0.9387	0.9767		100	100	100		Amino Acid	Lysine Metabolism	407	56-87-1	2850	147.113
	98			N2-acetyllysine	LC/MS polar	36751	C12989	HMDB00446	92907		0.34	0.77	2.24		0.0002	0.0008	0.1822	0.3364	0.0009	0.0027		1.5103	0.5197	1.1647		100	100	100		Amino Acid	Lysine Metabolism	100001721	1946-82-3	3372.6	187.109
	99			N6-acetyllysine	LC/MS neg	36752	C02727	HMDB00206	92832		1.64	0.64	0.39		0.0179	0.022	0.027	0.119	0.0005	0.0019		1.1188	1.8319	0.7149		100	100	100		Amino Acid	Lysine Metabolism	100001734	692-04-6	1059	187.109
	106			N6-methyllysine	LC/MS pos early	62860	C02728	HMDB02038	164795		0.83	0.72	0.87		0.1546	0.1152	0.0248	0.1164	0.396	0.2162		1.19	0.9852	0.8574		100	100	100		Amino Acid	Lysine Metabolism	100003415	1188-07-4	2831	161.128
	107			N6,N6-dimethyllysine	LC/MS pos early	62862	C05545	HMDB13287	193344		1.21	0.58	0.48		0.181	0.131	0.0013	0.0232	0.0002	0.0012		1.1339	1.3697	0.6556		100	100	100		Amino Acid	Lysine Metabolism	100020417	2259-86-1	2831	175.144
	108			N6,N6,N6-trimethyllysine	LC/MS pos early	1498	C03793	HMDB01325	440120		0.85	0.81	0.95		0.2081	0.1435	0.1117	0.2627	0.736	0.3461		1.1446	0.971	0.9217		100	100	100		Amino Acid	Lysine Metabolism	189	23284-33-5	2825	189.16
	111			5-(galactosylhydroxy)-L-lysine	LC/MS pos early	43582					1.26	1.23	0.97		0.4536	0.262	0.1801	0.3364	0.8255	0.3697		0.9106	1.1517	1.1197		100	88	100		Amino Acid	Lysine Metabolism	100002462	32448-36-5	2755	325.161
	112			fructosyllysine	LC/MS pos early	46227			123708		0.38	0.68	1.82		0.0028	0.0057	0.0169	0.087	0.0183	0.02		1.4916	0.5612	1.0199		100	100	100		Amino Acid	Lysine Metabolism	100005373	21291-40-7	2784	309.166
	114			2-aminoadipate	LC/MS polar	6146	C00956	HMDB00510	469		3.11	5.98	1.92		0.0063	0.0106	0.0332	0.1336	0.7999	0.3645		0.7749	2.4065	4.6315		88	100	100		Amino Acid	Lysine Metabolism	381	542-32-5;1118-90-7	3500	160.062
	118			glutarylcarnitine (C5-DC)	LC/MS pos early	44664		HMDB13130	71464488		0.32	1	3.14		6.93e-06	8.5527e-05	0.906	0.7388	5.4598e-06	0.0001		1.2247	0.3886	1.2217		100	100	100		Amino Acid	Lysine Metabolism	100001593	102636-82-8	2393	276.144
	122			pipecolate	LC/MS pos early	1444	C00408	HMDB00070	849		1.76	0.91	0.52		0.396	0.2387	0.535	0.5879	0.253	0.1492		0.9336	1.6389	0.8514		100	100	100		Amino Acid	Lysine Metabolism	1025	4043-87-2	2200	130.086
	128			N,N,N-trimethyl-5-aminovalerate	LC/MS pos early	57687					2.38	1.33	0.56		0.0003	0.0012	0.1003	0.2541	0.0056	0.0084		0.7465	1.7769	0.9941		100	100	100		Amino Acid	Lysine Metabolism	100015962		2186	160.133
	129		Phenylalanine Metabolism	phenylalanine	LC/MS pos early	64	C00079	HMDB00159	6140		1.03	0.85	0.82		0.6146	0.329	0.0247	0.1164	0.0096	0.0125		1.0509	1.0828	0.8925		100	100	100		Amino Acid	Phenylalanine Metabolism	460	63-91-2	2878	166.086
	130			N-acetylphenylalanine	LC/MS neg	33950	C03519	HMDB00512	74839		1.65	1.16	0.7		0.0082	0.0125	0.1145	0.2676	0.0506	0.0424		0.9001	1.487	1.047		100	100	100		Amino Acid	Phenylalanine Metabolism	100001256	2018-61-3	2597	206.082
	151		Tyrosine Metabolism	tyrosine	LC/MS pos early	1299	C00082	HMDB00158	6057		0.93	0.9	0.97		0.4873	0.2776	0.2969	0.4627	0.8105	0.3661		1.0932	1.0189	0.9871		100	100	100		Amino Acid	Tyrosine Metabolism	815	60-18-4	2430	182.081
	162			4-hydroxyphenylpyruvate	LC/MS neg	1669	C01179	HMDB00707	979		1.31	1.07	0.81		0.6224	0.3297	0.6019	0.6161	0.9151	0.3947		0.724	0.9512	0.7713		50	63	63		Amino Acid	Tyrosine Metabolism	1141	156-39-8	1690	179.035
	167			3-(4-hydroxyphenyl)lactate	LC/MS neg	32197	C03672	HMDB00755	9378		0.6	1.05	1.76		0.0089	0.0131	0.9026	0.7388	0.0107	0.0136		1.2223	0.7276	1.2828		100	100	100		Amino Acid	Tyrosine Metabolism	240	6482-98-0	1379	181.051
	171			phenol sulfate	LC/MS neg	32553	C02180	HMDB60015	74426		0.61	0.72	1.18		0.0099	0.0143	0.0057	0.0459	0.2039	0.1247		1.2935	0.7893	0.9302		100	100	100		Amino Acid	Tyrosine Metabolism	100001510	937-34-8	2156	172.991
	172			phenol glucuronide	LC/MS neg	52747		HMDB60014	87235		0.44	0.7	1.59		0.017	0.0212	0.324	0.4774	0.0252	0.0253		1.5544	0.6853	1.0911		100	38	88		Amino Acid	Tyrosine Metabolism	100006679	17685-05-1	1800	269.067
	198			O-methyltyrosine	LC/MS pos early	37451			76957		1.35	1.07	0.8		0.0671	0.0603	0.5265	0.5869	0.1516	0.0978		0.9675	1.3015	1.0349		100	100	100		Amino Acid	Tyrosine Metabolism	100002078	1080-06-4	2790	196.097
	208			N-formylphenylalanine	LC/MS neg	48433			759256		1.43	0.96	0.67		0.0074	0.0116	0.3506	0.4877	0.0047	0.0078		0.6888	0.9827	0.6615		13	88	0		Amino Acid	Tyrosine Metabolism	100006056	13200-85-6	2360	192.067
	228		Tryptophan Metabolism	tryptophan	LC/MS pos early	54	C00078	HMDB00929	6305		0.94	0.79	0.84		0.3959	0.2387	0.009	0.06	0.0533	0.0441		1.1542	1.083	0.9079		100	100	100		Amino Acid	Tryptophan Metabolism	565	73-22-3	2986	205.097
	235			C-glycosyltryptophan	LC/MS pos early	48782			10981970		2.02	1.3	0.64		0.0005	0.0018	0.1052	0.2557	0.0193	0.0205		0.826	1.6717	1.0768		100	100	100		Amino Acid	Tryptophan Metabolism	100006379	180509-18-6	2700	367.15
	239			kynurenine	LC/MS pos early	15140	C00328	HMDB00684	161166		0.58	0.59	1.01		0.0877	0.073	0.0932	0.2446	0.9133	0.3947		1.6261	0.9479	0.958		100	100	100		Amino Acid	Tryptophan Metabolism	100000265	2922-83-0	2739	209.092
	243			kynurenate	LC/MS neg	1417	C01717	HMDB00715	3845		0.98	0.89	0.91		0.9941	0.4553	0.558	0.6047	0.5019	0.2582		0.9856	0.9645	0.8769		75	63	50		Amino Acid	Tryptophan Metabolism	98	492-27-3	2224	188.035
	258			serotonin	LC/MS pos early	2342	C00780	HMDB00259	5202		2.58	0.8	0.31		0.002	0.0044	0.6498	0.6394	7.9211e-05	0.0005		0.9347	2.4119	0.7454		88	100	100		Amino Acid	Tryptophan Metabolism	504	153-98-0	2550	177.102
	265			indolelactate	LC/MS neg	18349	C02043	HMDB00671	92904		0.9	0.81	0.9		0.4173	0.2465	0.1379	0.2891	0.6126	0.3		1.109	0.9944	0.8992		88	75	63		Amino Acid	Tryptophan Metabolism	100000463	832-97-3	2286	204.067
	274			indole-3-carboxylate	LC/MS neg	38116	C19837	HMDB03320	69867		0.79	1.11	1.4		0.0577	0.0537	0.4653	0.5439	0.0182	0.02		0.996	0.7918	1.1102		88	38	100		Amino Acid	Tryptophan Metabolism	100002185	771-50-6	1710	160.04
	276			indoleacetylglycine	LC/MS pos early	54730			446640		0.59	1.06	1.79		0.0035	0.0068	0.9256	0.7423	0.0281	0.0274		1.0378	0.6126	1.0954		100	38	88		Amino Acid	Tryptophan Metabolism	100006730		2400	233.092
	288		Leucine, Isoleucine and Valine Metabolism	leucine	LC/MS pos early	60					1.06	0.82	0.78		0.433	0.2539	0.01	0.064	0.0021	0.0044		1.0883	1.1501	0.8939		100	100	100		Amino Acid	Leucine, Isoleucine and Valine Metabolism	397	61-90-5	2864	132.102
	289			N-acetylleucine	LC/MS neg	1587	C02710	HMDB11756	70912		1.32	0.95	0.72		0.0643	0.0584	0.7114	0.6743	0.0463	0.0393		0.9508	1.2528	0.9078		100	100	100		Amino Acid	Leucine, Isoleucine and Valine Metabolism	1082	1188-21-2	2400	172.098
	295			4-methyl-2-oxopentanoate	LC/MS neg	22116	C00233	HMDB00695	70		2.11	0.93	0.44		0.2023	0.1407	0.9993	0.7558	0.1865	0.1161		0.825	1.7393	0.7637		63	88	75		Amino Acid	Leucine, Isoleucine and Valine Metabolism	100000551	816-66-0	2170	129.056
	304			isovalerylglycine	LC/MS neg	35107		HMDB00678	546304		0.71	1.24	1.74		0.0543	0.0507	0.1216	0.2744	0.008	0.0112		1.0922	0.7784	1.3573		100	100	100		Amino Acid	Leucine, Isoleucine and Valine Metabolism	100001452	16284-60-9	1950	158.082
	312			beta-hydroxyisovalerate	LC/MS polar	12129		HMDB00754	69362		2.36	0.77	0.33		0.0024	0.0052	0.1	0.2541	0.0003	0.0013		0.965	2.2763	0.7436		100	100	100		Amino Acid	Leucine, Isoleucine and Valine Metabolism	1442	625-08-1	1149.8	117.056
	328			isoleucine	LC/MS pos early	1125	C00407	HMDB00172	6306		0.89	0.78	0.87		0.1174	0.0933	0.0025	0.0277	0.0606	0.0484		1.1251	1.0009	0.8749		100	100	100		Amino Acid	Leucine, Isoleucine and Valine Metabolism	376	73-32-5	2800	132.102
	340			2-methylbutyrylglycine	LC/MS neg	31928		HMDB00339	193872		0.71	1.21	1.7		0.0384	0.0393	0.3674	0.4938	0.0185	0.02		0.9737	0.6941	1.1828		100	88	88		Amino Acid	Leucine, Isoleucine and Valine Metabolism	100001155	52320-67-9	1884	158.082
	341			tiglylcarnitine (C5:1-DC)	LC/MS pos early	35428		HMDB02366	22833596		0.49	0.62	1.26		0.0096	0.0139	0.0628	0.1888	0.339	0.1885		1.3252	0.6538	0.8261		100	13	25		Amino Acid	Leucine, Isoleucine and Valine Metabolism	100001597	64191-86-2	2962	244.154
	346			ethylmalonate	LC/MS polar	15765		HMDB00622	11756		0.75	0.89	1.19		0.0735	0.0629	0.4619	0.5435	0.2481	0.1472		1.1243	0.8441	1.0056		100	88	100		Amino Acid	Leucine, Isoleucine and Valine Metabolism	2054	601-75-2	2785	131.035
	347			methylsuccinate	LC/MS polar	15745		HMDB01844	10349		0.92	1.31	1.43		0.4889	0.2776	0.066	0.1915	0.0201	0.0211		1.0324	0.9466	1.3542		100	100	100		Amino Acid	Leucine, Isoleucine and Valine Metabolism	2051	498-21-5	2800	131.035
	353			valine	LC/MS pos early	1649	C00183	HMDB00883	6287		0.89	0.75	0.84		0.1548	0.1152	0.0049	0.0422	0.0789	0.0582		1.1064	0.9852	0.829		100	100	100		Amino Acid	Leucine, Isoleucine and Valine Metabolism	566	72-18-4	2479	118.086
	362			isobutyrylcarnitine (C4)	LC/MS pos early	33441		HMDB00736	168379		1.74	1.05	0.6		0.0455	0.0442	0.8705	0.7315	0.0683	0.0519		0.8312	1.4502	0.8743		75	100	88		Amino Acid	Leucine, Isoleucine and Valine Metabolism	100001055	25518-49-4	2810	232.154
	370		Methionine, Cysteine, SAM and Taurine Metabolism	methionine	LC/MS pos early	1302	C00073	HMDB00696	6137		0.99	0.85	0.87		0.804	0.4002	0.0357	0.1365	0.0728	0.0549		1.063	1.0486	0.9084		100	100	100		Amino Acid	Methionine, Cysteine, SAM and Taurine Metabolism	415	63-68-3	2526	150.058
	371			N-acetylmethionine	LC/MS neg	1589	C02712	HMDB11745	448580		1.91	1.33	0.7		0.0007	0.0022	0.2335	0.3954	0.0361	0.0328		0.7239	1.3822	0.9643		100	100	100		Amino Acid	Methionine, Cysteine, SAM and Taurine Metabolism	1083	65-82-7	1787	190.054
	372			N-formylmethionine	LC/MS neg	2829	C03145	HMDB01015	439750		0.8	1	1.26		0.0406	0.0404	0.9952	0.7558	0.0448	0.0384		1.053	0.8373	1.0518		100	100	100		Amino Acid	Methionine, Cysteine, SAM and Taurine Metabolism	194	4289-98-9	1543.8	176.039
	373			S-methylmethionine	LC/MS pos early	38127	C05319	HMDB38670	458		0.08	0.35	4.27		7.3947e-06	8.6699e-05	0.0034	0.031	0.001	0.0029		2.0514	0.1692	0.7218		100	13	100		Amino Acid	Methionine, Cysteine, SAM and Taurine Metabolism	100002183	3493-12-07	2555	164.074
	374			methionine sulfone	LC/MS pos early	44878			69961		1.21	1.35	1.12		0.3612	0.2212	0.2024	0.3565	0.6636	0.3191		0.6486	0.7841	0.8766		25	50	38		Amino Acid	Methionine, Cysteine, SAM and Taurine Metabolism	100004635	820-10-0	1250	182.048
	375			methionine sulfoxide	LC/MS pos early	18374	C02989	HMDB02005	158980		1.42	0.81	0.57		0.0271	0.0297	0.0303	0.1282	0.0015	0.0035		1.0729	1.525	0.8695		100	100	100		Amino Acid	Methionine, Cysteine, SAM and Taurine Metabolism	100000039	3226-65-1	1272	166.053
	376			N-acetylmethionine sulfoxide	LC/MS pos early	45428			193368		3.6	1.65	0.46		1.333e-05	0.0001	0.131	0.2816	0.0037	0.0066		0.6727	2.4214	1.1108		100	100	100		Amino Acid	Methionine, Cysteine, SAM and Taurine Metabolism	100005463	108646-71-5	880	208.064
	380			S-adenosylmethionine (SAM)	LC/MS pos early	15915	C00019	HMDB01185	34756		0.23	0.8	3.55		0.0001	0.0006	0.3844	0.4979	0.0004	0.0015		1.3089	0.2946	1.0466		100	75	100		Amino Acid	Methionine, Cysteine, SAM and Taurine Metabolism	1263	24346-00-7;86867-01-8;86867-0108	3002	399.145
	381			S-adenosylhomocysteine (SAH)	LC/MS neg	42382	C00021	HMDB00939	439155		0.66	0.93	1.42		0.0001	0.0006	0.4088	0.5137	0.0003	0.0014		1.172	0.7677	1.0874		100	100	100		Amino Acid	Methionine, Cysteine, SAM and Taurine Metabolism	197	979-92-0	1832.4	383.114
	385			homocysteine	LC/MS pos early	15128	C00155	HMDB00742	778		1.23	1.09	0.89		0.2511	0.1644	0.788	0.7039	0.4845	0.2517		0.9685	1.1908	1.0556		100	100	100		Amino Acid	Methionine, Cysteine, SAM and Taurine Metabolism	311	454-29-5	2155	136.043
	388			cystathionine	LC/MS pos early	15705	C02291	HMDB00099	439258		0.5	1.39	2.79		0.0249	0.0281	0.1008	0.2541	3.2118e-05	0.0003		1.3514	0.6738	1.8813		100	100	100		Amino Acid	Methionine, Cysteine, SAM and Taurine Metabolism	310	535-34-2	2270	223.075
	390			cysteine	LC/MS pos early	1868	C00097	HMDB00574	5862		0.71	0.72	1.01		0.0087	0.013	0.0123	0.0754	0.9821	0.4135		1.3054	0.9306	0.9384		100	100	100		Amino Acid	Methionine, Cysteine, SAM and Taurine Metabolism	800	52-90-4;56-89-3	1475	122.027
	391			N-acetylcysteine	LC/MS pos early	1586	C06809	HMDB01890	12035		1.65	1.14	0.69		0.0005	0.0018	0.1703	0.3252	0.001	0.0028		0.8995	1.4801	1.0267		100	100	100		Amino Acid	Methionine, Cysteine, SAM and Taurine Metabolism	1107	616-91-1	1416	164.038
	395			cysteine s-sulfate	LC/MS neg	22176	C05824	HMDB00731	115015		1.88	1.29	0.69		9.6965e-05	0.0005	0.2782	0.4446	0.0229	0.0233		0.6701	1.2608	0.8644		63	100	75		Amino Acid	Methionine, Cysteine, SAM and Taurine Metabolism	100000808	1637-71-4	640.9	199.969
	402			cysteine sulfinic acid	LC/MS pos early	37443	C00606	HMDB00996	109		0.69	0.87	1.26		0.3149	0.1974	0.9784	0.7522	0.2233	0.1343		1.5357	1.0536	1.3287		100	63	100		Amino Acid	Methionine, Cysteine, SAM and Taurine Metabolism	100002113	207121-48-0	597	154.017
	404			hypotaurine	LC/MS polar	590	C00519	HMDB00965	107812		0.2	1.18	5.86		2.0777e-05	0.0002	0.5193	0.5823	6.0263e-06	0.0001		1.4798	0.299	1.7519		100	100	100		Amino Acid	Methionine, Cysteine, SAM and Taurine Metabolism	358	300-84-5	2763.4	108.012
	405			taurine	LC/MS neg	2125	C00245	HMDB00251	1123		0.54	1.57	2.92		0.0014	0.0035	0.0108	0.0679	3.5632e-05	0.0003		1.0987	0.5895	1.7199		100	100	100		Amino Acid	Methionine, Cysteine, SAM and Taurine Metabolism	512	107-35-7	690	124.007
	407			N-acetyltaurine	LC/MS neg	48187			159864		2.36	2.16	0.92		0.0007	0.0021	0.0013	0.0232	0.6491	0.3137		0.6174	1.4569	1.3353		88	100	100		Amino Acid	Methionine, Cysteine, SAM and Taurine Metabolism	100005466		800	166.018
	411			3-sulfo-L-alanine	LC/MS polar	47089	C00506	HMDB02757	72886		1.26	0.55	0.43		0.4845	0.2771	0.0077	0.0528	0.005	0.008		1.2192	1.5376	0.6685		100	100	100		Amino Acid	Methionine, Cysteine, SAM and Taurine Metabolism	382	498-40-8	2890	167.997
	413		Urea cycle; Arginine and Proline Metabolism	arginine	LC/MS pos early	1638	C00062	HMDB00517	232		1.92	0.88	0.46		0.007	0.0113	0.4574	0.5412	0.0022	0.0044		0.9911	1.9071	0.8745		100	100	100		Amino Acid	Urea cycle; Arginine and Proline Metabolism	231	1119-34-2	2825	175.119
	415			urea	LC/MS pos early	1670	C00086	HMDB00294	1176		1.29	1.1	0.85		0.0102	0.0145	0.8335	0.7134	0.1744	0.1098		0.9599	1.2401	1.0575		100	100	100		Amino Acid	Urea cycle; Arginine and Proline Metabolism	533	57-13-6	700	121.072
	417			ornithine	LC/MS pos early	1493	C00077	HMDB03374	6262		0.96	0.86	0.9		0.6475	0.3397	0.0985	0.2534	0.2892	0.1673		1.0255	0.9844	0.8834		100	100	100		Amino Acid	Urea cycle; Arginine and Proline Metabolism	444	3184-13-2	2800	133.097
	419			3-amino-2-piperidone	LC/MS pos early	62853		HMDB00323	5200225		1.26	0.66	0.52		0.8765	0.4273	0.0457	0.1548	0.3076	0.1746		1.0738	1.349	0.7044		100	63	75		Amino Acid	Urea cycle; Arginine and Proline Metabolism	100020361	1892-22-4	2065	115.087
	421			2-oxoarginine*	LC/MS pos early	55072	C03771	HMDB04225	558		0.51	0.85	1.67		0.0633	0.0577	0.694	0.6675	0.0955	0.0679		1.4745	0.7565	1.2602		100	100	100		Amino Acid	Urea cycle; Arginine and Proline Metabolism	100002784	3715-10-04	1760	174.087
	422			citrulline	LC/MS pos early	2132	C00327	HMDB00904	9750		0.67	1.23	1.85		0.001	0.0028	0.0293	0.1254	3.2786e-05	0.0003		1.0653	0.7089	1.3107		100	100	100		Amino Acid	Urea cycle; Arginine and Proline Metabolism	391	372-75-8	1520	176.103
	424			homocitrulline	LC/MS polar	22138	C02427	HMDB00679	65072		0.57	0.96	1.68		0.0106	0.0148	0.8327	0.7134	0.0156	0.0176		1.2854	0.7328	1.2303		100	50	100		Amino Acid	Urea cycle; Arginine and Proline Metabolism	100000963	1190-49-4	3006.8	188.104
	425			proline	LC/MS pos early	1898	C00148	HMDB00162	145742		0.86	1	1.17		0.238	0.1585	0.8531	0.7217	0.0539	0.0443		1.0929	0.9365	1.093		100	100	100		Amino Acid	Urea cycle; Arginine and Proline Metabolism	480	147-85-3	1603	116.071
	428			dimethylarginine (SDMA + ADMA)	LC/MS pos early	36808	C03626	HMDB01539	123831		1.03	0.75	0.73		0.8229	0.4062	0.0146	0.0824	0.015	0.0172		1.0642	1.0965	0.7964		100	100	100		Amino Acid	Urea cycle; Arginine and Proline Metabolism	100001810	102783-24-4	2850	203.15
	429			N-acetylarginine	LC/MS pos early	33953	C02562	HMDB04620	67427		0.42	0.96	2.27		0.0254	0.0283	0.874	0.7329	0.0421	0.0367		0.9106	0.3848	0.8748		88	25	88		Amino Acid	Urea cycle; Arginine and Proline Metabolism	100001266	155-84-0	2245	217.13
	433			N-acetylcitrulline	LC/MS neg	48434	C15532	HMDB00856	656979		0.88	1.66	1.88		0.3817	0.2325	0.0631	0.1888	0.0206	0.0214		0.8639	0.7605	1.4314		50	25	100		Amino Acid	Urea cycle; Arginine and Proline Metabolism	100001577	33965-42-3	940	216.099
	440			trans-4-hydroxyproline	LC/MS pos early	32306	C01157	HMDB00725	5810		1.04	1.24	1.19		0.9409	0.4458	0.1857	0.3411	0.2915	0.1679		0.9201	0.96	1.138		100	100	100		Amino Acid	Urea cycle; Arginine and Proline Metabolism	1001	51-35-4	1064	132.066
	442			pro-hydroxy-pro	LC/MS pos early	35127		HMDB06695	11673055		0.9	0.91	1.02		0.4147	0.2456	0.442	0.5262	0.9933	0.4158		0.9585	0.8602	0.8745		88	75	63		Amino Acid	Urea cycle; Arginine and Proline Metabolism	100001167	18684-24-7	2128	229.118
	446			N,N,N-trimethyl-alanylproline betaine (TMAP)	LC/MS pos early	62947					1.82	1.16	0.64		0.975	0.4517	0.7956	0.7039	0.826	0.3697		0.8288	1.5049	0.9618		88	75	75		Amino Acid	Urea cycle; Arginine and Proline Metabolism	100020217		2470	229.155
	448			N-monomethylarginine	LC/MS pos early	43586	C03884	HMDB29416	132862		0.96	0.77	0.8		0.5769	0.3168	0.0093	0.061	0.0362	0.0328		1.0703	1.0255	0.8226		100	100	100		Amino Acid	Urea cycle; Arginine and Proline Metabolism	100004488	53308-83-1	2845	189.135
	449			argininate*	LC/MS pos early	57461		HMDB03148	160437		2.15	1.26	0.59		0.7749	0.3891	0.4027	0.5124	0.7711	0.3563		0.8023	1.7275	1.0129		88	75	100		Amino Acid	Urea cycle; Arginine and Proline Metabolism	100002769	157-07-3	2150	176.103
	454		Creatine Metabolism	guanidinoacetate	LC/MS pos early	43802	C00581	HMDB00128	763		1.08	2.72	2.52		0.9933	0.4553	0.0328	0.1332	0.0443	0.0382		0.8383	0.9063	2.2808		100	63	100		Amino Acid	Creatine Metabolism	344	352-97-6	1937	118.061
	455			creatine	LC/MS pos early	27718	C00300	HMDB00064	586		6.54	1.27	0.19		4.1076e-05	0.0003	0.025	0.1164	9.951e-05	0.0006		0.7358	4.8097	0.9343		100	100	100		Amino Acid	Creatine Metabolism	1221	57-00-1	1947	132.077
	456			creatinine	LC/MS pos early	513	C00791	HMDB00562	588		1.47	1.61	1.09		0.0991	0.0813	0.1939	0.348	0.7737	0.3568		0.8447	1.2454	1.3605		100	100	100		Amino Acid	Creatine Metabolism	275	60-27-5	2055	114.066
	457			creatine phosphate	LC/MS neg	33951	C02305	HMDB01511	9548602		3.59	1	0.28		0.0187	0.0227			0.0187	0.02		0.2559	0.9185	0.2559		0	88	0		Amino Acid	Creatine Metabolism	100000112	922-32-7	603	210.029
	463		Polyamine Metabolism	putrescine	LC/MS pos early	1408	C00134	HMDB01414	1045		2.63	1.15	0.44		0.0211	0.0251	0.3082	0.4706	0.0466	0.0393		0.8932	2.3502	1.026		100	100	100		Amino Acid	Polyamine Metabolism	49	110-60-1	3027	89.1073
	469			spermidine	LC/MS pos early	485	C00315	HMDB01257	1102		0.73	0.98	1.33		0.0791	0.0672	0.8466	0.7198	0.1069	0.0744		1.181	0.8664	1.1546		100	100	100		Amino Acid	Polyamine Metabolism	50	124-20-9	3355	146.165
	470			N('1)-acetylspermidine	LC/MS pos early	57689	C00612	HMDB01276	496		5.93	2.37	0.4		0.1858	0.1332	0.0411	0.1508	0.8801	0.3886		0.8686	5.1539	2.059		100	100	100		Amino Acid	Polyamine Metabolism	187	14278-49-0	3075	188.176
	476			spermine	LC/MS pos early	603	C00750	HMDB01256	1103		0.78	0.71	0.91		0.5905	0.3205	0.6986	0.6697	0.7945	0.3633		1.6059	1.2586	1.1469		100	88	100		Amino Acid	Polyamine Metabolism	507	71-44-3	3350	203.223
	479			5-methylthioadenosine (MTA)	LC/MS pos early	1419	C00170	HMDB01173	439176		0.49	1.12	2.3		3.0734e-05	0.0002	0.1503	0.306	8.5448e-06	0.0001		1.0714	0.5232	1.2052		100	100	100		Amino Acid	Polyamine Metabolism	212	2457-80-9	2752	298.097
	485		Guanidino and Acetamido Metabolism	4-guanidinobutanoate	LC/MS pos early	15681	C01035	HMDB03464	500		0.46	1.04	2.26		0.0404	0.0404	0.8471	0.7198	0.03	0.0289		1.2908	0.5919	1.3368		100	100	100		Amino Acid	Guanidino and Acetamido Metabolism	100000096	463-003;463-00-3	2320	146.092
	486			guanidinosuccinate	LC/MS polar	32446	C03139	HMDB03157	97856		1.37	0.4	0.29		0.4122	0.2447	0.0017	0.0232	0.3174	0.1787		1.488	2.0338	0.5985		100	63	75		Amino Acid	Guanidino and Acetamido Metabolism	100001212	6133-30-8	3550	174.052
	488		Glutathione Metabolism	glutathione, reduced (GSH)	LC/MS pos early	2127	C00051	HMDB00125	124886		0.09	1.19	13.14		1.3499e-06	4.1942e-05	0.5343	0.5879	2.5224e-07	1.7684e-05		1.2166	0.11	1.445		100	100	100		Amino Acid	Glutathione Metabolism	496	70-18-8	2000	308.091
	489			glutathione, oxidized (GSSG)	LC/MS pos early	27727	C00127	HMDB03337	65359		0.6	1.27	2.13		0.0122	0.0165	0.0161	0.0854	0.0018	0.0039		0.9881	0.5896	1.2574		100	100	100		Amino Acid	Glutathione Metabolism	448	103239-24-3	2667	613.159
	492			cysteine-glutathione disulfide	LC/MS pos early	35159		HMDB00656	4247235		0.85	0.54	0.64		0.2307	0.1547	8.9711e-05	0.0094	0.0255	0.0256		1.4212	1.2065	0.7715		100	100	100		Amino Acid	Glutathione Metabolism	100001437	13081-14-6	2465	427.095
	493			S-methylglutathione	LC/MS pos early	33944	C11347		3605667		0.16	1.29	7.87		6.5376e-05	0.0004	0.1245	0.2761	1.1957e-05	0.0002		1.1314	0.1859	1.4639		100	88	100		Amino Acid	Glutathione Metabolism	100001259	2922-56-7	2200	322.107
	495			cysteinylglycine	LC/MS pos early	35637	C01419	HMDB00078	439498		0.12	1.16	9.86		2.274e-06	4.8476e-05	0.4992	0.5692	1.4654e-07	1.7684e-05		1.1904	0.1402	1.3826		100	100	100		Amino Acid	Glutathione Metabolism	278	19246-18-5	2132	179.048
	498			5-oxoproline	LC/MS neg	1494	C01879	HMDB00267	7405		0.93	1.07	1.15		0.8302	0.409	0.421	0.5188	0.1858	0.116		1.0937	1.0196	1.1679		100	100	100		Amino Acid	Glutathione Metabolism	1021	98-79-3	738.5	128.035
	501			2-hydroxybutyrate/2-hydroxyisobutyrate	LC/MS polar	52281					0.8	0.98	1.23		0.29	0.1853	0.9348	0.7435	0.3062	0.1743		1.3397	1.068	1.3147		100	100	100		Amino Acid	Glutathione Metabolism	100008928		1258	103.04
	503			ophthalmate	LC/MS pos early	34592		HMDB05765	7018721		4.25	1.68	0.4		0.0031	0.0061	0.4053	0.5126	0.0259	0.0258		0.851	3.6133	1.4273		100	100	100		Amino Acid	Glutathione Metabolism	100001311	495-27-2	2085	290.135
	506			S-(1,2-dicarboxyethyl)glutathione	LC/MS neg	63009			9802383		0.96	0.92	0.96		0.7011	0.3613	0.7242	0.6816	0.8737	0.3878		1.0559	1.0135	0.9718		100	50	88		Amino Acid	Glutathione Metabolism	100020967	1115-52-2	543	422.087
	507			4-hydroxy-nonenal-glutathione	LC/MS neg	48487					0.29	1.42	4.95		0.0001	0.0006	0.0319	0.1322	1.6265e-05	0.0002		1.1124	0.32	1.5829		100	88	100		Amino Acid	Glutathione Metabolism	100006240	99927-70-5	3319.2	462.192
	508			3'-dephospho-CoA-glutathione*	LC/MS neg	62807					0.66	0.94	1.43		0.242	0.1594	0.7851	0.7039	0.0224	0.0229		1.2159	0.8008	1.1482		100	100	100		Amino Acid	Glutathione Metabolism	100020899		1690	495.101
	509			CoA-glutathione*	LC/MS neg	62804	C00920		11953788		0.75	1.65	2.19		0.587	0.3193	0.061	0.1872	0.0027	0.0052		1.1603	0.8741	1.9186		100	100	100		Amino Acid	Glutathione Metabolism	269	6477-52-7	1326	535.084
	548	Peptide	Gamma-glutamyl Amino Acid	gamma-glutamylcysteine	LC/MS pos early	1778	C00669	HMDB01049	842		0.22	0.83	3.83		5.7879e-08	7.5785e-06	0.1624	0.3206	2.6753e-07	1.7684e-05		1.3298	0.2892	1.1069		100	100	100		Peptide	Gamma-glutamyl Amino Acid	1036	636-58-8	2118	251.07
	549			gamma-glutamylglutamate	LC/MS pos early	36738	C05282	HMDB11737	92865		0.58	0.85	1.46		0.0059	0.0102	0.4005	0.5115	0.0007	0.0024		1.2974	0.7542	1.0999		100	100	100		Peptide	Gamma-glutamyl Amino Acid	331	1116-22-9	1775	277.103
	551			gamma-glutamylglycine	LC/MS pos early	33949		HMDB11667	165527		0.69	0.75	1.08		0.2748	0.177	0.3825	0.4979	0.7946	0.3633		1.4213	0.983	1.062		100	100	100		Peptide	Gamma-glutamyl Amino Acid	100001294	1948-29-4	1535	205.082
	553			gamma-glutamylisoleucine*	LC/MS pos early	34456		HMDB11170	14253342		0.48	0.98	2.05		0.001	0.0028	0.8282	0.7132	0.0039	0.0067		0.9086	0.4322	0.8868		88	13	75		Peptide	Gamma-glutamyl Amino Acid	100001485		2940	261.144
	554			gamma-glutamylleucine	LC/MS pos early	18369		HMDB11171	151023		0.52	1.14	2.2		0.0014	0.0036	0.3847	0.4979	0.0003	0.0013		1.2517	0.6477	1.4254		100	100	100		Peptide	Gamma-glutamyl Amino Acid	1268	2566-39-4	2991	261.144
	556			gamma-glutamyl-epsilon-lysine	LC/MS pos early	33934		HMDB03869	7015685		4.32	2.14	0.5		4.3799e-06	7.0528e-05	0.039	0.146	0.0058	0.0086		0.6446	2.7842	1.3793		100	100	100		Peptide	Gamma-glutamyl Amino Acid	100001262	17105-15-6	2725	276.155
	559			gamma-glutamylthreonine	LC/MS pos early	33364		HMDB29159	76078708		1.09	0.66	0.61		0.4994	0.2803	0.1046	0.2557	0.0189	0.0202		1.3046	1.4264	0.8666		100	100	100		Peptide	Gamma-glutamyl Amino Acid	100001314	5652-48-2	1750	249.108
	562			gamma-glutamylvaline	LC/MS pos early	43829		HMDB11172	7015683		0.56	0.86	1.55		0.0136	0.0179	0.3272	0.4774	0.0664	0.051		1.2408	0.6902	1.0732		100	63	100		Peptide	Gamma-glutamyl Amino Acid	100001126	2746-34-1	2700	247.129
	578		Dipeptide	alanylleucine	LC/MS pos early	37093		HMDB28691	259583		2.31	0.93	0.4		0.0073	0.0115	0.9799	0.7522	0.0053	0.0083		1.0628	2.4573	0.9879		100	100	100		Peptide	Dipeptide	100001890	1638-60-4	3055	203.139
	727			glycylisoleucine	LC/MS pos early	36659		HMDB28844	88079		1.37	0.96	0.7		0.032	0.0338	0.7595	0.697	0.0345	0.0317		0.9123	1.2484	0.8786		100	100	100		Peptide	Dipeptide	100001790	19461-38-2	3002	189.123
	728			glycylleucine	LC/MS pos early	34398	C02155	HMDB00759	92843		1.59	1.09	0.68		0.006	0.0103	0.5771	0.6102	0.0138	0.0165		0.8209	1.3044	0.8924		100	100	100		Peptide	Dipeptide	100001258	869-19-2	3059	189.123
	738			glycylvaline	LC/MS pos early	18357		HMDB28854	97417		0.92	0.97	1.06		0.5838	0.3184	0.8697	0.7315	0.7041	0.3348		1.1422	1.0509	1.1128		100	100	100		Peptide	Dipeptide	100000487	1963-21-9	2734	175.108
	762			isoleucylglycine	LC/MS neg	40008		HMDB28907	342532		1.35	0.77	0.57		0.0862	0.0719	0.4165	0.5166	0.0055	0.0083		1.1225	1.5137	0.8637		100	100	100		Peptide	Dipeptide	100003169	868-28-0	1992	187.109
	781			leucylglycine	LC/MS pos early	40045		HMDB28929	79070		2.7	0.9	0.33		0.0051	0.0094	0.9172	0.7396	0.0029	0.0054		1.1008	2.9672	0.9927		100	100	100		Peptide	Dipeptide	100003185	686-50-0	2778	189.123
	801			lysylleucine	LC/MS pos early	40020		HMDB28955	4682588		2.74	0.79	0.29		0.0332	0.0346	0.9323	0.743	0.016	0.0179		0.7819	2.1401	0.6184		63	88	75		Peptide	Dipeptide	100003196	7369-79-1	3370	260.197
	830			phenylalanylalanine	LC/MS pos early	41374			5488196		2.29	1.05	0.46		0.0076	0.0118	0.7072	0.6719	0.0122	0.0148		0.8477	1.9418	0.8904		100	100	100		Peptide	Dipeptide	100003589	3918-87-4	2909	237.123
	835			phenylalanylglycine	LC/MS pos early	41370		HMDB28995	98207		1.81	0.99	0.55		0.0268	0.0295	0.6864	0.6625	0.0271	0.0268		1.0137	1.8313	1.004		100	100	100		Peptide	Dipeptide	100003588	721-90-4	2898	223.108
	855			prolylglycine	LC/MS pos early	40703		HMDB11178	6426709		0.65	0.95	1.47		0.0015	0.0038	0.6526	0.6405	0.0054	0.0083		1.2579	0.8141	1.1968		100	100	100		Peptide	Dipeptide	100003674	2578-57-6	2136	173.092
	904			tryptophylglycine	LC/MS pos early	43028		HMDB29083	263471		2.03	0.76	0.38		0.0202	0.0241	0.7504	0.6946	0.0097	0.0127		0.7432	1.506	0.565		50	100	63		Peptide	Dipeptide	100003609	7360-09-0	2930	262.119
	920			tyrosylglycine	LC/MS neg	41375		HMDB29105	259323		2.38	0.96	0.4		0.0019	0.0044	0.7527	0.6946	0.0086	0.0116		0.9314	2.2156	0.895		100	100	100		Peptide	Dipeptide	100003598	673-05-5	1635	237.088
	937			valylglutamine	LC/MS pos early	42079		HMDB29125	5253209		2.89	0.83	0.29		0.0015	0.0038	0.5467	0.5991	0.0005	0.0019		1.0819	3.1218	0.8974		100	100	100		Peptide	Dipeptide	100003640	42854-54-6	2295	246.145
	938			valylglycine	LC/MS pos early	40475		HMDB29127	136487		1.57	0.95	0.6		0.0327	0.0344	0.9041	0.7388	0.0199	0.021		1.0081	1.5847	0.9548		100	100	100		Peptide	Dipeptide	100003641	686-43-1	2444	175.108
	951			leucylglutamine*	LC/MS pos early	48189		HMDB28927	4305457		2.7	0.83	0.31		0.0066	0.011	0.6809	0.6599	0.0022	0.0044		1.1058	2.9845	0.9152		100	100	100		Peptide	Dipeptide	100003183		2620	260.161
	1038		Acetylated Peptides	phenylacetylglycine	LC/MS neg	33945	C05598	HMDB00821	68144		0.61	0.74	1.22		0.0063	0.0106	0.0711	0.2032	0.2087	0.1273		1.4287	0.8647	1.0515		100	100	100		Peptide	Acetylated Peptides	100001275	500-98-1	2375	192.067
	1071	Carbohydrate	Glycolysis, Gluconeogenesis, and Pyruvate Metabolism	glucose	LC/MS polar	20488	C00031	HMDB00122	5793		0.27	0.77	2.8		0.0005	0.0018	0.0031	0.031	0.0017	0.0037		1.3644	0.373	1.0438		100	100	100		Carbohydrate	Glycolysis, Gluconeogenesis, and Pyruvate Metabolism	572	50-99-7	2342	179.056
	1072			glucose 6-phosphate	LC/MS polar	31260	C00668	HMDB01401	5958		0.22	1.2	5.56		0.0022	0.0048	0.6054	0.6161	0.0016	0.0036		1.3592	0.293	1.628		100	100	100		Carbohydrate	Glycolysis, Gluconeogenesis, and Pyruvate Metabolism	291	103192-55-8	4537	259.022
	1078			fructose 1,6-diphosphate/glucose 1,6-diphosphate/myo-inositol diphosphates	LC/MS neg	46896	C00354				1.61	1.9	1.18		0.4242	0.2493	0.1499	0.306	0.6078	0.2983		0.733	1.1773	1.3936		63	50	88		Carbohydrate	Glycolysis, Gluconeogenesis, and Pyruvate Metabolism	100002180		551	338.989
	1080			dihydroxyacetone phosphate (DHAP)	LC/MS neg	15522	C00111	HMDB01473	668		0.73	0.38	0.51		0.2416	0.1594	0.0019	0.0242	0.0825	0.0601		1.5057	1.1025	0.5673		100	63	50		Carbohydrate	Glycolysis, Gluconeogenesis, and Pyruvate Metabolism	309	102783-56-2	603	168.991
	1084			2-phosphoglycerate	LC/MS polar	35629	C00631	HMDB03391	59		0.39	1.4	3.63		0.007	0.0113	0.1216	0.2744	6.2573e-05	0.0004		0.8335	0.3211	1.1664		100	38	100		Carbohydrate	Glycolysis, Gluconeogenesis, and Pyruvate Metabolism	100000093	70195-25-4	4550	184.986
	1085			3-phosphoglycerate	LC/MS neg	1414	C00597	HMDB00807	724		0.64	1.14	1.78		0.0365	0.0379	0.3905	0.5021	0.0087	0.0117		1.1131	0.7139	1.2711		100	100	100		Carbohydrate	Glycolysis, Gluconeogenesis, and Pyruvate Metabolism	132	80731-10-8	583	184.986
	1086			phosphoenolpyruvate (PEP)	LC/MS neg	597	C00074	HMDB00263	1005		0.55	1.09	1.98		0.0291	0.0316	0.5007	0.5692	0.0117	0.0145		1.2268	0.6779	1.3401		100	100	100		Carbohydrate	Glycolysis, Gluconeogenesis, and Pyruvate Metabolism	463	10526-80-4	587.3	166.975
	1087			pyruvate	LC/MS polar	48990	C00022	HMDB00243	1060		0.96	1.24	1.29		0.9433	0.4458	0.1488	0.306	0.0277	0.0271		0.9932	0.9511	1.2306		100	100	100		Carbohydrate	Glycolysis, Gluconeogenesis, and Pyruvate Metabolism	823	127-17-3	1083	87.0088
	1088			lactate	LC/MS neg	527	C00186	HMDB00190	612		0.75	0.99	1.31		0.98	0.4517	0.386	0.498	0.2018	0.124		1.1587	0.8709	1.1415		50	100	100		Carbohydrate	Glycolysis, Gluconeogenesis, and Pyruvate Metabolism	482	79-33-4	681.6	89.0244
	1091			glycerate	LC/MS polar	1572	C00258	HMDB00139	752		0.97	1.02	1.05		0.4026	0.2408	0.9635	0.7522	0.412	0.2221		1.1029	1.0726	1.126		100	100	100		Carbohydrate	Glycolysis, Gluconeogenesis, and Pyruvate Metabolism	1052	600-19-1	2070.4	105.019
	1094		Pentose Phosphate Pathway	6-phosphogluconate	LC/MS neg	15442	C00345	HMDB01316	91493		0.68	1.15	1.7		0.0939	0.0773	0.6198	0.6191	0.0535	0.0441		1.1343	0.768	1.3068		100	100	100		Carbohydrate	Pentose Phosphate Pathway	100000341	921-62-0;53411-70-4	583.9	275.017
	1103			ribose 1-phosphate	LC/MS polar	1763	C00620	HMDB01489	439236		0.91	0.97	1.07		0.6119	0.3283	0.9667	0.7522	0.5781	0.2877		1.062	0.9695	1.0346		100	100	100		Carbohydrate	Pentose Phosphate Pathway	219	50-99-7;58459-37-3	4025	229.012
	1105			sedoheptulose-7-phosphate	LC/MS neg	35649	C05382	HMDB01068	616		0.27	1.1	4.07		1.6475e-05	0.0001	0.4402	0.5262	9.943e-06	0.0001		1.1345	0.3063	1.2452		100	100	100		Carbohydrate	Pentose Phosphate Pathway	100001628	2646-35-7	599.6	289.033
	1109		Pentose Metabolism	ribose	LC/MS polar	1471	C00121	HMDB00283	5779		0.86	0.89	1.04		0.2141	0.1468	0.3723	0.4969	0.4783	0.2497		1.244	1.0672	1.1101		100	100	100		Carbohydrate	Pentose Metabolism	914	50-69-1	1508.2	195.051
	1110			ribitol	LC/MS polar	15772	C00474	HMDB00508	6912		0.16	0.93	5.81		2.1252e-05	0.0002	0.5308	0.5879	0.0009	0.0027		2.2251	0.3556	2.0663		100	100	100		Carbohydrate	Pentose Metabolism	100000406	488-81-3	1789.6	151.061
	1112			ribulose/xylulose	LC/MS polar	48340			5289590		0.42	0.92	2.21		0.0089	0.0131	0.6198	0.6191	0.0484	0.0407		1.0772	0.4504	0.9946		75	38	88		Carbohydrate	Pentose Metabolism	100006122		1400	149.046
	1125			arabitol/xylitol	LC/MS polar	48885	C01904		6912		0.34	0.84	2.48		5.4456e-06	7.5114e-05	0.3101	0.4709	3.9907e-05	0.0003		1.2654	0.4298	1.0667		100	100	100		Carbohydrate	Pentose Metabolism	100006430		1932.4	151.061
	1131			arabonate/xylonate	LC/MS polar	48255					0.46	0.74	1.64		0.0014	0.0035	0.0627	0.1888	0.0351	0.032		1.3186	0.6	0.9813		100	100	100		Carbohydrate	Pentose Metabolism	100006115		2700	165.04
	1134			sedoheptulose	LC/MS polar	53237		HMDB03219	5459879		0.14	0.77	5.29		6.5457e-08	7.5785e-06	0.1229	0.2745	1.4888e-06	5.2972e-05		1.8122	0.2622	1.3875		100	100	100		Carbohydrate	Pentose Metabolism	100002619	3019-74-7	2255	209.067
	1135			ribulonate/xylulonate/lyxonate*	LC/MS polar	61858					0.33	0.86	2.59		0.0002	0.0008	0.3148	0.4743	0.0014	0.0035		1.63	0.542	1.403		100	100	100		Carbohydrate	Pentose Metabolism	100019968		2350	165.04
	1136		Glycogen Metabolism	maltohexaose	LC/MS polar	35170	C01936	HMDB12253	439606		0.28	0.78	2.79		0.0006	0.0019	0.4871	0.5619	0.0003	0.0013		1.1481	0.3231	0.9007		100	25	88		Carbohydrate	Glycogen Metabolism	100001448	34620-77-4	5860	989.32
	1138			maltopentaose	LC/MS polar	35163	C06218	HMDB12254	13489094		0.29	0.69	2.39		1.1185e-05	0.0001	0.0783	0.2172	0.0004	0.0015		1.3319	0.3858	0.9207		100	25	100		Carbohydrate	Glycogen Metabolism	100001447	34620-76-3	5365	827.267
	1139			maltotetraose	LC/MS neg	15910	C02052	HMDB01296	446495		0.1	0.73	7.3		0.0009	0.0026	0.0278	0.1203	0.0014	0.0034		1.4777	0.1479	1.0804		100	88	100		Carbohydrate	Glycogen Metabolism	100000275	34612-38-9	910	665.215
	1141			maltotriose	LC/MS neg	44688	C01835	HMDB01262	439586		0.13	0.71	5.34		0.0027	0.0054	0.0019	0.0239	0.0043	0.0074		1.4301	0.1897	1.0133		100	88	100		Carbohydrate	Glycogen Metabolism	100000276	1109-28-0	812	503.162
	1144			maltose	LC/MS polar	15586	C00208	HMDB00163	10991489		0.26	0.76	2.92		0.0081	0.0124	0.0031	0.031	0.0146	0.0169		1.3383	0.3494	1.0217		100	100	100		Carbohydrate	Glycogen Metabolism	913	6363-53-7	3329.4	387.114
	1170		Disaccharides and Oligosaccharides	sucrose	LC/MS polar	1519	C00089	HMDB00258	5988		0.46	1.38	3.02		0.2387	0.1585	0.7024	0.6706	0.1494	0.0969		0.7349	0.3354	1.0133		63	25	50		Carbohydrate	Disaccharides and Oligosaccharides	935	57-50-1	3092	387.114
	1189		Fructose, Mannose and Galactose Metabolism	fructose	LC/MS polar	577	C00095	HMDB00660	5984		0.25	0.56	2.23		0.001	0.0028	0.0002	0.0094	0.0112	0.0143		1.7215	0.4351	0.9681		100	100	100		Carbohydrate	Fructose, Mannose and Galactose Metabolism	878	57-48-7	2065	179.056
	1194			mannitol/sorbitol	LC/MS polar	46142	C00794	HMDB00247	5780		0.2	0.65	3.24		2.2088e-05	0.0002	0.0441	0.1548	0.003	0.0056		1.8656	0.3718	1.2038		100	100	100		Carbohydrate	Fructose, Mannose and Galactose Metabolism	100001740		2320	181.072
	1195			mannose	LC/MS polar	584	C00159	HMDB00169	18950		0.12	0.78	6.47		0.0001	0.0006	0.0249	0.1164	0.0002	0.0012		1.4217	0.1707	1.1047		100	100	100		Carbohydrate	Fructose, Mannose and Galactose Metabolism	803	3458-28-4	2200	179.056
	1206			galactose 1-phosphate	LC/MS polar	15706	C00446	HMDB00645	123912		0.36	1.22	3.34		0.0009	0.0026	0.3191	0.4774	0.0002	0.001		1.218	0.4437	1.4816		100	88	100		Carbohydrate	Fructose, Mannose and Galactose Metabolism	100000300	19046-60-7	4552	259.022
	1211			2-ketogulonate	LC/MS polar	15306	C15673	HMDB11732	50		0.09	0.36	3.89		4.7582e-06	7.0528e-05	0.0109	0.0679	0.0009	0.0027		2.9589	0.2773	1.0787		100	100	100		Carbohydrate	Fructose, Mannose and Galactose Metabolism	100000092	342385-52-8	2794.7	193.035
	1215			galactonate	LC/MS polar	27719	C00880	HMDB00565	128869		0.3	0.87	2.86		0.0001	0.0006	0.5774	0.6102	0.0002	0.001		1.3907	0.4236	1.2115		100	100	100		Carbohydrate	Fructose, Mannose and Galactose Metabolism	100001026	299-28-5	3085	195.051
	1222		Nucleotide Sugar	UDP-glucose	LC/MS polar	32344	C00029	HMDB00286	8629		0.6	1.08	1.8		0.0398	0.0403	0.5754	0.6102	0.024	0.0243		1.0794	0.6482	1.1669		100	100	100		Carbohydrate	Nucleotide Sugar	1096	117756-22-6	3950	565.048
	1226			UDP-galactose	LC/MS polar	15860	C00052	HMDB00302	18068		0.85	1.14	1.35		0.3516	0.2158	0.5327	0.5879	0.1609	0.1029		1.0306	0.8714	1.1791		100	100	100		Carbohydrate	Nucleotide Sugar	100000298	2956-16-3;91183-98-1;137868-52-1	4000	565.048
	1227			UDP-glucuronate	LC/MS neg	2763	C00167	HMDB00935	17473		2.54	1.01	0.4		0.1528	0.1152	0.887	0.7351	0.1678	0.106		0.5045	1.2817	0.5112		25	50	38		Carbohydrate	Nucleotide Sugar	1097	28053-08-9;63700-19-6	588	579.027
	1234			UDP-N-acetylglucosamine/galactosamine	LC/MS neg	46148					0.67	1.15	1.72		0.1991	0.139	0.687	0.6625	0.1232	0.084		1.4273	0.9522	1.6349		100	100	100		Carbohydrate	Nucleotide Sugar	100002957		646	606.074
	1243		Aminosugar Metabolism	glucosamine-6-phosphate	LC/MS polar	580	C00352	HMDB01254	439217		0.23	1.18	5.24		0.0023	0.0049	0.7921	0.7039	0.0017	0.0038		1.3095	0.295	1.5459		100	100	100		Carbohydrate	Aminosugar Metabolism	290	3616-42-0	4521.5	258.038
	1247			glucuronate	LC/MS polar	15443	C00191	HMDB00127	444791		0.41	0.65	1.6		2.4668e-05	0.0002	0.0069	0.0494	0.0089	0.0119		1.5572	0.6336	1.013		100	100	100		Carbohydrate	Aminosugar Metabolism	100000257	207300-70-7	3233.3	193.035
	1252			N-acetylglucosamine 6-phosphate	LC/MS polar	15107	C00357	HMDB02817	439219		0.76	1.73	2.29		0.2358	0.1575	0.0147	0.0824	0.0023	0.0046		0.86	0.6506	1.4869		100	75	100		Carbohydrate	Aminosugar Metabolism	1213	102029-88-9	4114	300.049
	1253			N-acetyl-glucosamine 1-phosphate	LC/MS polar	15741	C04256	HMDB01367	440364		1.88	1.44	0.77		0.0066	0.011	0.2317	0.3954	0.1168	0.0802		0.7243	1.3641	1.0444		100	100	100		Carbohydrate	Aminosugar Metabolism	1212	31281-59-1	4052	300.049
	1259			N-acetylneuraminate	LC/MS pos early	32377	C00270	HMDB00230	439197		2.62	1.43	0.55		1.7887e-06	4.1942e-05	0.0513	0.17	0.0009	0.0027		0.7702	2.0213	1.1041		100	100	100		Carbohydrate	Aminosugar Metabolism	1162	131-48-6	660	310.113
	1270			N-acetylglucosaminylasparagine	LC/MS pos early	48149	C04540	HMDB00489	123826		0.6	1.73	2.9		0.1901	0.1347	0.0256	0.1175	0.0003	0.0012		0.7506	0.4485	1.2988		75	38	100		Carbohydrate	Aminosugar Metabolism	1215	2776-93-4	1212	336.14
	1271			erythronate*	LC/MS polar	42420		HMDB00613	2781043		0.72	0.91	1.27		0.0055	0.0099	0.3257	0.4774	0.1335	0.0885		1.1715	0.8399	1.0636		100	100	100		Carbohydrate	Aminosugar Metabolism	100001320	88759-55-1	2186	135.03
	1273			N-acetylglucosamine/N-acetylgalactosamine	LC/MS pos early	46539		HMDB00215	24139		0.81	0.88	1.08		0.1106	0.0894	0.2849	0.4493	0.5728	0.2864		1.0904	0.8813	0.9544		100	100	100		Carbohydrate	Aminosugar Metabolism	100006435		715	222.097
	1274			N-glycolylneuraminate	LC/MS pos early	37123	C03410	HMDB00833	123802		1.49	1.34	0.91		0.0002	0.0009	0.0089	0.06	0.2649	0.1554		0.7987	1.1864	1.0741		100	100	100		Carbohydrate	Aminosugar Metabolism	100001491	1113-83-3	636	326.108
	1279	Energy	TCA Cycle	citrate	LC/MS neg	1564	C00158	HMDB00094	311		2.86	1.07	0.37		0.0058	0.0102	0.9735	0.7522	0.0084	0.0115		0.6684	1.9102	0.7157		100	100	100		Energy	TCA Cycle	1124	77-92-9	582	191.02
	1281			aconitate [cis or trans]	LC/MS neg	46173					2.81	1.08	0.38		0.0054	0.0099	0.9614	0.7522	0.0107	0.0136		0.7401	2.0803	0.7989		100	100	100		Energy	TCA Cycle	100001359		580	173.009
	1285			alpha-ketoglutarate	LC/MS polar	528	C00026	HMDB00208	51		1.05	1.05	1		0.5014	0.2806	0.6195	0.6191	0.9124	0.3947		0.9487	0.9977	0.9982		100	100	100		Energy	TCA Cycle	93	305-72-6;328-50-7;22202-68-2	2700	145.014
	1287			succinylcarnitine (C4-DC)	LC/MS pos early	37058		HMDB61717	71464481		0.51	1.15	2.25		0.0168	0.0211	0.4347	0.5262	0.0016	0.0036		1.323	0.6789	1.525		100	75	100		Energy	TCA Cycle	100001948	256928-74-2	2291	262.129
	1288			succinate	LC/MS polar	1437	C00042	HMDB00254	1110		0.7	0.72	1.02		0.3988	0.2398	0.4119	0.5153	0.9196	0.395		1.4068	0.989	1.0119		100	100	100		Energy	TCA Cycle	252	110-15-6	3149	117.019
	1289			fumarate	LC/MS polar	1643	C00122	HMDB00134	444972		0.74	0.69	0.93		0.0519	0.0494	0.006	0.0464	0.8076	0.366		1.2847	0.9541	0.8915		100	100	100		Energy	TCA Cycle	330	100-17-8	3084	115.004
	1291			malate	LC/MS polar	1303	C00149	HMDB00156	525		0.85	0.78	0.92		0.1882	0.1345	0.0429	0.1528	0.5811	0.2885		1.1842	1.0037	0.9244		100	100	100		Energy	TCA Cycle	409	6915-15-7	3343.1	133.014
	1295			itaconate	LC/MS polar	18373	C00490	HMDB02092	811		14.56	1.34	0.09		0.0007	0.0022	0.1209	0.2744	0.0011	0.003		0.8027	11.6833	1.0765		100	100	100		Energy	TCA Cycle	100000455	97-65-4	2969	129.019
	1301			2-methylcitrate/homocitrate	LC/MS neg	52282					1.29	2.09	1.63		0.6056	0.3257	0.0034	0.031	0.0613	0.0487		0.7635	0.9819	1.5992		100	100	100		Energy	TCA Cycle	100008929		575	205.035
	1304		Oxidative Phosphorylation	acetylphosphate	LC/MS polar	15488	C00227	HMDB01494	186		0.76	1.19	1.57		0.1375	0.1062	0.15	0.306	0.0218	0.0223		1.0546	0.7999	1.2556		100	100	100		Energy	Oxidative Phosphorylation	1211	94249-01-1	4013.9	138.98
	1306			phosphate	LC/MS pos early	42109	C00009	HMDB01429	1061		1.29	1.12	0.87		0.0056	0.01	0.1759	0.3327	0.0372	0.033		0.8631	1.1146	0.9655		100	100	100		Energy	Oxidative Phosphorylation	461	7664-38-2	576	98.9842
	1308	Lipid	Fatty Acid Synthesis	malonylcarnitine	LC/MS pos early	37059		HMDB02095	22833583		0.36	0.87	2.4		2.6458e-06	5.1701e-05	0.2746	0.4413	1.0108e-05	0.0001		1.1946	0.4356	1.045		100	100	100		Lipid	Fatty Acid Synthesis	100001526	853728-01-5	2086	248.113
	1309			malonate	LC/MS polar	15872	C00383	HMDB00691	867		1.45	1.08	0.74		0.0008	0.0023	0.3561	0.4921	0.005	0.008		0.9039	1.3115	0.9736		100	100	100		Lipid	Fatty Acid Synthesis	818	141-82-2;26522-22-85-0	3447	103.004
	1324		Medium Chain Fatty Acid	caproate (6:0)	LC/MS neg	32489	C01585	HMDB00535	8892		0.99	1.11	1.12		0.9251	0.4438	0.323	0.4774	0.3084	0.1747		0.974	0.9685	1.085		100	100	100		Lipid	Medium Chain Fatty Acid	926	142-62-1	2713.7	115.076
	1325			heptanoate (7:0)	LC/MS neg	1644	C17714	HMDB00666	8094		1.07	1.79	1.67		0.7168	0.3654	0.8119	0.7132	0.6015	0.2965		2.8398	3.0456	5.0734		100	63	88		Lipid	Medium Chain Fatty Acid	925	111-14-8	3670	129.092
	1334			5-dodecenoate (12:1n7)	LC/MS neg	33968		HMDB00529	5312378		1.41	1.22	0.86		0.0374	0.0386	0.1231	0.2745	0.2646	0.1554		0.9001	1.2716	1.0959		100	100	100		Lipid	Medium Chain Fatty Acid	100001232	2430-94-6	5224	197.155
	1337		Long Chain Saturated Fatty Acid	myristate (14:0)	LC/MS neg	1365	C06424	HMDB00806	11005		1.57	0.91	0.58		0.0311	0.0332	0.8253	0.7132	0.0126	0.0151		1.2082	1.8985	1.0963		100	100	100		Lipid	Long Chain Saturated Fatty Acid	519	544-63-8	5440	227.202
	1338			pentadecanoate (15:0)	LC/MS neg	1361	C16537	HMDB00826	13849		1.38	1.03	0.74		0.0398	0.0403	0.8997	0.7388	0.0608	0.0484		1.027	1.4179	1.0539		100	100	100		Lipid	Long Chain Saturated Fatty Acid	980	1002-84-2;10002-84-2	5521	241.217
	1339			palmitate (16:0)	LC/MS neg	1336	C00249	HMDB00220	985		1.53	1.05	0.68		0.0263	0.0291	0.8274	0.7132	0.0465	0.0393		0.9413	1.4389	0.9838		100	100	100		Lipid	Long Chain Saturated Fatty Acid	424	57-10-3	5618	255.233
	1340			margarate (17:0)	LC/MS neg	1121		HMDB02259	10465		1.3	0.94	0.73		0.2032	0.1407	0.9031	0.7388	0.1502	0.0972		1.2031	1.5639	1.1343		100	100	100		Lipid	Long Chain Saturated Fatty Acid	891	506-12-7	5731	269.249
	1341			stearate (18:0)	LC/MS neg	1358	C01530	HMDB00827	5281		1.22	1.03	0.85		0.2736	0.1768	0.8251	0.7132	0.3636	0.2006		1.0417	1.2743	1.0769		100	100	100		Lipid	Long Chain Saturated Fatty Acid	439	57-11-4	5872	283.264
	1342			nonadecanoate (19:0)	LC/MS neg	1356	C16535	HMDB00772	12591		0.79	0.82	1.05		0.7076	0.3623	0.7545	0.6946	0.9513	0.403		1.5499	1.22	1.2756		100	100	100		Lipid	Long Chain Saturated Fatty Acid	892	646-30-0	6068	297.28
	1343			arachidate (20:0)	LC/MS neg	1118	C06425	HMDB02212	10467		0.89	0.76	0.86		0.9802	0.4517	0.4313	0.5248	0.2919	0.1679		1.4105	1.2518	1.0758		100	100	100		Lipid	Long Chain Saturated Fatty Acid	893	506-30-9	6240	311.296
	1345			behenate (22:0)*	LC/MS neg	12125	C08281	HMDB00944	8215		1.16	0.81	0.7		0.3492	0.2155	0.5946	0.6149	0.1265	0.0849		1.4609	1.6909	1.1786		100	100	100		Lipid	Long Chain Saturated Fatty Acid	314	112-85-6	6745	339.327
	1350		Long Chain Monounsaturated Fatty Acid	myristoleate (14:1n5)	LC/MS neg	32418	C08322	HMDB02000	5281119		1.91	1.33	0.7		0.0023	0.0049	0.2664	0.4336	0.0574	0.0464		0.8662	1.6526	1.1516		100	100	100		Lipid	Long Chain Monounsaturated Fatty Acid	100001198	544-64-9	5346.9	225.186
	1353			palmitoleate (16:1n7)	LC/MS neg	33447	C08362	HMDB03229	445638		1.54	0.61	0.4		0.0597	0.0549	0.2616	0.4276	0.0023	0.0045		1.3942	2.1455	0.8542		100	100	100		Lipid	Long Chain Monounsaturated Fatty Acid	452	373-49-9	5475	253.217
	1355			10-heptadecenoate (17:1n7)	LC/MS neg	33971		HMDB60038	5312435		1.22	0.66	0.54		0.1979	0.1387	0.3432	0.484	0.0119	0.0146		1.4518	1.7754	0.9559		100	100	100		Lipid	Long Chain Monounsaturated Fatty Acid	100001278	29743-97-3	5555	267.233
	1357			oleate/vaccenate (18:1)	LC/MS neg	52285					1.6	1.02	0.64		0.0224	0.0259	0.9767	0.7522	0.0339	0.0316		0.9765	1.5672	0.9963		100	100	100		Lipid	Long Chain Monounsaturated Fatty Acid	100008930		5655	281.249
	1363			10-nonadecenoate (19:1n9)	LC/MS neg	33972		HMDB13622	5312513		1.8	1.04	0.58		0.0215	0.0254	0.7621	0.697	0.0371	0.033		1.1469	2.0673	1.1962		100	100	100		Lipid	Long Chain Monounsaturated Fatty Acid	100001277	73033-09-7	5780	295.264
	1366			eicosenoate (20:1)	LC/MS neg	33587	C16526	HMDB02231	5282768		1.27	0.79	0.62		0.1621	0.1195	0.714	0.675	0.0544	0.0445		1.443	1.8345	1.1348		100	100	100		Lipid	Long Chain Monounsaturated Fatty Acid	100001335		5950	309.28
	1370			erucate (22:1n9)	LC/MS neg	1552	C08316	HMDB02068	5281116		0.98	0.62	0.63		0.4397	0.2559	0.4409	0.5262	0.0576	0.0464		1.6082	1.5755	0.9929		100	100	100		Lipid	Long Chain Monounsaturated Fatty Acid	1087	112-86-7	6355.6	337.311
	1372			nervonate (24:1n9)*	LC/MS neg	52674	C08323	HMDB02368	5281120		1.39	0.64	0.46		0.2144	0.1468	0.3437	0.484	0.0265	0.0263		1.3497	1.8761	0.8612		100	100	100		Lipid	Long Chain Monounsaturated Fatty Acid	100001231	506-37-6	6804	365.342
	1373		Long Chain Polyunsaturated Fatty Acid (n3 and n6)	tetradecadienoate (14:2)*	LC/MS neg	62850		HMDB00560	5312409		1.86	1.58	0.85		0.0081	0.0124	0.0852	0.2314	0.2801	0.163		0.7423	1.3835	1.1754		100	100	100		Lipid	Long Chain Polyunsaturated Fatty Acid (n3 and n6)	100020343	39039-37-7	5292	223.17
	1374			hexadecatrienoate (16:3n3)	LC/MS neg	57651			5312428		2.55	1.22	0.48		0.0017	0.0041	0.4277	0.5221	0.0119	0.0146		0.855	2.1762	1.0447		100	100	100		Lipid	Long Chain Polyunsaturated Fatty Acid (n3 and n6)	100009393	7561-64-0	5330	249.186
	1380			stearidonate (18:4n3)	LC/MS neg	33969	C16300	HMDB06547	5312508		0.94	0.7	0.75		0.8573	0.4197	0.3211	0.4774	0.4629	0.2442		1.4533	1.3607	1.0188		100	100	100		Lipid	Long Chain Polyunsaturated Fatty Acid (n3 and n6)	100001229	111174-40-4	5395	275.202
	1383			eicosapentaenoate (EPA; 20:5n3)	LC/MS neg	18467	C06428	HMDB01999	446284		1.05	0.8	0.76		0.6447	0.3397	0.6231	0.6191	0.3182	0.1787		1.4471	1.5142	1.1551		100	100	100		Lipid	Long Chain Polyunsaturated Fatty Acid (n3 and n6)	2050	10-2005-9;10417-94-4	5450	301.217
	1384			heneicosapentaenoate (21:5n3)	LC/MS neg	57658			11998573		1.35	1.14	0.85		0.2891	0.1852	0.8259	0.7132	0.4889	0.2533		1.1926	1.6048	1.3635		100	100	100		Lipid	Long Chain Polyunsaturated Fatty Acid (n3 and n6)	100015797	24257-10-1	5514	315.233
	1385			docosapentaenoate (n3 DPA; 22:5n3)	LC/MS neg	32504	C16513	HMDB06528	6441454		1.89	1.22	0.64		0.016	0.0202	0.5634	0.6075	0.0813	0.0594		0.9621	1.8197	1.1717		100	100	100		Lipid	Long Chain Polyunsaturated Fatty Acid (n3 and n6)	100001181	2234-74-4	5571	329.249
	1386			docosahexaenoate (DHA; 22:6n3)	LC/MS neg	44675	C06429	HMDB02183	445580		1.49	1.16	0.77		0.0667	0.0601	0.6001	0.6161	0.2265	0.1358		1.0212	1.526	1.1823		100	100	100		Lipid	Long Chain Polyunsaturated Fatty Acid (n3 and n6)	100000665	6217-54-5	5525	327.233
	1387			docosatrienoate (22:3n3)	LC/MS neg	32417	C16534	HMDB02823	5312556		1.18	0.58	0.49		0.3688	0.2252	0.222	0.3858	0.0343	0.0316		1.5051	1.7703	0.8737		100	100	100		Lipid	Long Chain Polyunsaturated Fatty Acid (n3 and n6)	100001195	59708-86-0	5823	333.28
	1388			nisinate (24:6n3)	LC/MS neg	57810		HMDB02007	11792612		0.99	1.07	1.08		0.9524	0.4458	0.9694	0.7522	0.9911	0.4157		1.1134	1.1009	1.1885		100	100	100		Lipid	Long Chain Polyunsaturated Fatty Acid (n3 and n6)	100015785	68378-49-4	5657	355.264
	1389			hexadecadienoate (16:2n6)	LC/MS neg	57652		HMDB00477			2.41	1.24	0.52		0.0032	0.0063	0.3652	0.4938	0.0142	0.0167		0.9116	2.1971	1.1323		100	100	100		Lipid	Long Chain Polyunsaturated Fatty Acid (n3 and n6)	100009394	28290-73-5	5398	251.202
	1390			linoleate (18:2n6)	LC/MS neg	1105	C01595	HMDB00673	5280450		1.75	1.12	0.64		0.0062	0.0106	0.5495	0.6004	0.0208	0.0215		0.8545	1.4981	0.9537		100	100	100		Lipid	Long Chain Polyunsaturated Fatty Acid (n3 and n6)	180	60-33-3	5535	279.233
	1392			linolenate [alpha or gamma; (18:3n3 or 6)]	LC/MS neg	34035	C06426	HMDB03073	5280934		1.55	0.76	0.49		0.0883	0.0731	0.5078	0.5711	0.0187	0.02		1.2812	1.9808	0.97		100	100	100		Lipid	Long Chain Polyunsaturated Fatty Acid (n3 and n6)	100001337		5450	277.217
	1393			dihomo-linoleate (20:2n6)	LC/MS neg	17805	C16525	HMDB05060	6439848		1.41	0.89	0.63		0.1089	0.0883	0.8459	0.7198	0.0605	0.0484		1.2771	1.8063	1.1368		100	100	100		Lipid	Long Chain Polyunsaturated Fatty Acid (n3 and n6)	1231	2091-39-6	5730	307.264
	1395			dihomo-linolenate (20:3n3 or n6)	LC/MS neg	35718	C03242	HMDB02925	5280581		0.73	0.74	1.01		0.2274	0.1536	0.2422	0.4027	0.9998	0.4177		1.472	1.0762	1.087		100	100	100		Lipid	Long Chain Polyunsaturated Fatty Acid (n3 and n6)	100001739	17046-59-2	5596	305.249
	1396			arachidonate (20:4n6)	LC/MS neg	1110	C00219	HMDB01043	444899		0.88	0.88	1		0.4118	0.2447	0.4255	0.5221	0.9323	0.3981		1.3273	1.1715	1.1665		100	100	100		Lipid	Long Chain Polyunsaturated Fatty Acid (n3 and n6)	229	506-32-1	5535	303.233
	1398			adrenate (22:4n6)	LC/MS neg	32980	C16527	HMDB02226	5497181		2.44	1.13	0.46		0.0068	0.0111	0.9949	0.7558	0.0202	0.0211		1.0879	2.6496	1.2243		100	100	100		Lipid	Long Chain Polyunsaturated Fatty Acid (n3 and n6)	100001193	2091-25-0	5678	331.264
	1399			docosapentaenoate (n6 DPA; 22:5n6)	LC/MS neg	37478	C16513	HMDB01976	6441454		1.36	0.97	0.72		0.1547	0.1152	0.7712	0.7016	0.1249	0.0846		1.1102	1.5045	1.0763		100	100	100		Lipid	Long Chain Polyunsaturated Fatty Acid (n3 and n6)	100001580	25182-74-5	5624.5	329.249
	1400			docosadienoate (22:2n6)	LC/MS neg	32415	C16533	HMDB61714	5282807		1.03	0.57	0.55		0.3177	0.1987	0.4381	0.5262	0.0386	0.0339		1.6069	1.6535	0.9096		100	100	100		Lipid	Long Chain Polyunsaturated Fatty Acid (n3 and n6)	100001182	7370-49-2	6034	335.296
	1402			mead acid (20:3n9)	LC/MS neg	35174		HMDB10378	5312531		0.88	0.76	0.86		0.4877	0.2776	0.2512	0.4124	0.7366	0.3461		1.493	1.3116	1.1331		100	100	100		Lipid	Long Chain Polyunsaturated Fatty Acid (n3 and n6)	100001472	20590-32-3	5650	305.249
	1458		Fatty Acid, Branched	(14 or 15)-methylpalmitate (a17:0 or i17:0)	LC/MS neg	38768			17903417		1.3	0.95	0.73		0.1204	0.0947	0.9456	0.749	0.0667	0.051		1.0654	1.3832	1.0107		100	100	100		Lipid	Fatty Acid, Branched	100002945		5695	269.249
	1462			(16 or 17)-methylstearate (a19:0 or i19:0)	LC/MS neg	38296		HMDB37397	3083779		1.12	0.82	0.73		0.3502	0.2155	0.7474	0.6946	0.1523	0.0979		1.3678	1.5361	1.1269		100	100	100		Lipid	Fatty Acid, Branched	100002356	2724-59-6	5993	297.28
	1479		Fatty Acid, Dicarboxylate	glutarate (C5-DC)	LC/MS polar	396	C00489	HMDB00661	743		0.93	1.76	1.89		0.582	0.3183	0.1065	0.2568	0.0618	0.0489		0.9974	0.9274	1.7562		100	100	88		Lipid	Fatty Acid, Dicarboxylate	339	110-94-1	2900	131.035
	1482			3-methylglutarate/2-methylglutarate	LC/MS polar	54676		HMDB00752			0.87	1.23	1.41		0.3288	0.204	0.5659	0.608	0.2127	0.129		0.835	0.7239	1.0238		100	75	100		Lipid	Fatty Acid, Dicarboxylate	100010834		2832	145.051
	1483			2-hydroxyglutarate	LC/MS pos early	52294	C02630	HMDB0059655	43		1.25	1.58	1.27		0.2288	0.1541	0.001	0.0232	0.0768	0.0571		0.7724	0.9655	1.2226		100	100	100		Lipid	Fatty Acid, Dicarboxylate	100002070	40951-21-1	958	166.071
	1485			adipate (C6-DC)	LC/MS polar	21134	C06104	HMDB00448	196		1.26	1.65	1.31		0.5823	0.3183	0.0959	0.2499	0.2948	0.1692		0.5793	0.7316	0.9573		75	75	100		Lipid	Fatty Acid, Dicarboxylate	100000863	124-04-9	3000	145.051
	1487			2-hydroxyadipate	LC/MS polar	31934	C02360	HMDB00321	193530		1	1.47	1.47		0.9824	0.4517	0.2987	0.4627	0.2819	0.1636		1.0137	1.0135	1.4918		100	100	100		Lipid	Fatty Acid, Dicarboxylate	100001153	18294-85-4	3000	161.046
	1488			3-hydroxyadipate*	LC/MS polar	62069		HMDB00345	151913		2	1.07	0.54		0.0702	0.0619	0.8063	0.7117	0.0789	0.0582		0.9584	1.916	1.0277		100	100	100		Lipid	Fatty Acid, Dicarboxylate	100004396		3131	161.046
	1489			3-methyladipate	LC/MS polar	36749		HMDB00555	12292		0.39	1.04	2.7		0.0379	0.0389	0.9308	0.743	0.034	0.0316		1.181	0.4555	1.2278		88	63	88		Lipid	Fatty Acid, Dicarboxylate	100001765	3058-01-03	2865	159.066
	1493			pimelate (C7-DC)	LC/MS polar	15704	C02656	HMDB00857	385		0.63	0.63	1		0.0713	0.062	0.0644	0.1905	0.7547	0.351		1.5377	0.966	0.9653		100	100	100		Lipid	Fatty Acid, Dicarboxylate	100000101	111-16-0	2745	159.066
	1496			suberate (C8-DC)	LC/MS polar	15730	C08278	HMDB00893	10457		0.83	0.81	0.98		0.307	0.1935	0.2472	0.4075	0.9471	0.402		1.1669	0.9707	0.9484		100	100	100		Lipid	Fatty Acid, Dicarboxylate	100000016	505-48-6	2577.6	173.082
	1499			azelate (C9-DC)	LC/MS neg	18362	C08261	HMDB00784	2266		0.9	1.1	1.22		0.565	0.3117	0.379	0.4979	0.0951	0.0679		1.0083	0.9067	1.1096		100	100	100		Lipid	Fatty Acid, Dicarboxylate	2029	123-99-9	1276	187.098
	1501			sebacate (C10-DC)	LC/MS neg	32398	C08277	HMDB00792	5192		0.95	1.1	1.16		0.706	0.3622	0.3964	0.508	0.2121	0.129		0.9017	0.8602	0.9953		63	50	88		Lipid	Fatty Acid, Dicarboxylate	100001211	111-20-6	1788	201.113
	1503			undecanedioate (C11-DC)	LC/MS neg	42395		HMDB00888	15816		0.91	0.93	1.02		0.6229	0.3297	0.6713	0.6523	0.9574	0.404		0.9815	0.8973	0.9149		100	100	100		Lipid	Fatty Acid, Dicarboxylate	100001617	1852-04-6	2440	215.129
	1507			3-hydroxydodecanedioate*	LC/MS neg	62915		HMDB00413	16663321		1.83	1.36	0.74		0.0004	0.0015	0.4745	0.553	0.0708	0.0536		0.8284	1.5192	1.1288		100	100	100		Lipid	Fatty Acid, Dicarboxylate	100001454	34574-69-1	2252	245.139
	1509			dodecadienoate (12:2)*	LC/MS neg	62276					1.13	1.57	1.39		0.9653	0.4502	0.3627	0.4938	0.4173	0.2239		1.3734	1.55	2.1502		75	63	100		Lipid	Fatty Acid, Dicarboxylate	100020478		5146	195.139
	1515			hexadecanedioate (C16-DC)	LC/MS neg	35678	C19615	HMDB00672	10459		1.26	0.93	0.74		0.1585	0.1176	0.5241	0.586	0.0632	0.0495		0.9696	1.2231	0.9034		100	100	100		Lipid	Fatty Acid, Dicarboxylate	100001614	505-54-4	4615	285.207
	1516			hexadecenedioate (C16:1-DC)*	LC/MS neg	61862					2.01	0.8	0.4		0.0305	0.0328	0.3572	0.4921	0.0057	0.0085		0.9662	1.9408	0.7731		100	100	100		Lipid	Fatty Acid, Dicarboxylate	100019975		4380	283.191
	1519			octadecenedioate (C18:1-DC)*	LC/MS neg	61861					1.45	0.89	0.61		0.1182	0.0937	0.5923	0.6142	0.0367	0.0329		1.0114	1.4682	0.8955		100	100	100		Lipid	Fatty Acid, Dicarboxylate	100019978		4875	311.223
	1589		Fatty Acid Metabolism (also BCAA Metabolism)	butyrylglycine	LC/MS neg	31850		HMDB00808	88412		0.74	1.33	1.8		0.0714	0.062	0.0157	0.0854	0.0079	0.011		1.0055	0.7422	1.3357		100	100	100		Lipid	Fatty Acid Metabolism (also BCAA Metabolism)	100001151	20208-73-5	1470	144.067
	1591			propionylcarnitine (C3)	LC/MS pos early	32452	C03017	HMDB00824	107738		1.22	1.78	1.46		0.7918	0.395	0.0159	0.0854	0.1109	0.0768		0.8556	1.0414	1.5235		100	100	100		Lipid	Fatty Acid Metabolism (also BCAA Metabolism)	100001162	17298-37-2	2590	218.139
	1592			propionylglycine	LC/MS polar	31932		HMDB00783	98681		0.56	0.72	1.29		0.0332	0.0346	0.0777	0.2172	0.1638	0.1041		1.3552	0.7575	0.9768		100	100	100		Lipid	Fatty Acid Metabolism (also BCAA Metabolism)	100001150	21709-90-0	1502.5	130.051
	1594			methylmalonate (MMA)	LC/MS polar	1496	C02170	HMDB00202	487		0.9	0.8	0.89		0.34	0.2104	0.0405	0.1502	0.2426	0.1443		1.1733	1.0579	0.9365		100	100	100		Lipid	Fatty Acid Metabolism (also BCAA Metabolism)	418	516-05-2	3078.4	117.019
	1605		Fatty Acid Metabolism (Acyl Glycine)	isocaproylglycine	LC/MS neg	61789					1.09	1.19	1.09		0.692	0.3587	0.2854	0.4493	0.5467	0.2759		0.8071	0.8795	0.9605		75	63	88		Lipid	Fatty Acid Metabolism (Acyl Glycine)	100019816		2820	172.098
	1609			hexanoylglycine	LC/MS neg	35436		HMDB00701	99463		1.7	1.87	1.1		0.0417	0.0411	0.0269	0.119	0.7664	0.3549		0.7901	1.3419	1.4795		100	100	100		Lipid	Fatty Acid Metabolism (Acyl Glycine)	100001527	24003-67-6	2900	172.098
	1610			4-methylhexanoylglycine	LC/MS neg	62736					0.97	0.97	1.01		0.7046	0.3622	0.8095	0.7129	0.8686	0.3863		0.8818	0.8529	0.8588		75	50	63		Lipid	Fatty Acid Metabolism (Acyl Glycine)	100020632		3550	186.114
	1615			N-palmitoylglycine	LC/MS neg	42092		HMDB13034	151008		0.76	0.68	0.89		0.7702	0.3884	0.4868	0.5619	0.617	0.3014		1.4752	1.1187	0.9994		88	75	50		Lipid	Fatty Acid Metabolism (Acyl Glycine)	100003686	2441-41-0	5580	312.254
	1620			butenoylglycine	LC/MS neg	61785			6303498		2.01	1.9	0.94		0.0688	0.0611	0.0648	0.1905	0.9001	0.3914		0.9308	1.8737	1.7651		100	100	100		Lipid	Fatty Acid Metabolism (Acyl Glycine)	100016110	71428-89-2	1380	142.051
	1622			3-hydroxybutyroylglycine**	LC/MS neg	62064					2.16	1.74	0.81		0.0154	0.0199	0.0127	0.0766	0.5199	0.2649		0.7594	1.643	1.3248		100	100	100		Lipid	Fatty Acid Metabolism (Acyl Glycine)	100020211		889	160.062
	1629		Fatty Acid Metabolism (Acyl Carnitine, Short Chain)	acetylcarnitine (C2)	LC/MS pos early	32198	C02571	HMDB00201	1		2.43	2.58	1.06		0.0002	0.001	0.0011	0.0232	0.9576	0.404		0.519	1.261	1.3373		100	100	100		Lipid	Fatty Acid Metabolism (Acyl Carnitine, Short Chain)	100000802	5080-50-2	2282	204.123
	1641		Fatty Acid Metabolism (Acyl Carnitine, Long Chain Saturated)	myristoylcarnitine (C14)	LC/MS pos late	33952		HMDB05066	6426854		3.83	1.83	0.48		9.6958e-08	7.5785e-06	0.0025	0.0277	0.0003	0.0013		0.5643	2.1588	1.0318		100	100	100		Lipid	Fatty Acid Metabolism (Acyl Carnitine, Long Chain Saturated)	100001270	18822-89-4	1350	372.311
	1643			palmitoylcarnitine (C16)	LC/MS pos late	44681	C02990	HMDB00222	461		2.71	1.88	0.7		1.0739e-05	0.0001	0.0015	0.0232	0.0117	0.0145		0.5374	1.454	1.0128		100	100	100		Lipid	Fatty Acid Metabolism (Acyl Carnitine, Long Chain Saturated)	100000776	6865-14-1	1425	400.342
	1645			stearoylcarnitine (C18)	LC/MS pos late	34409		HMDB00848	6426855		2.05	1.98	0.96		0.0007	0.0021	0.0011	0.0232	0.7593	0.3524		0.589	1.21	1.1665		100	100	100		Lipid	Fatty Acid Metabolism (Acyl Carnitine, Long Chain Saturated)	100001391	18822-91-8	1485	428.373
	1646			arachidoylcarnitine (C20)*	LC/MS pos late	57513		HMDB06460			1.53	2.52	1.65		0.0111	0.0153	2.2136e-06	0.0005	0.0033	0.0059		0.6703	1.0228	1.6874		100	100	100		Lipid	Fatty Acid Metabolism (Acyl Carnitine, Long Chain Saturated)	100015833		1512	456.405
	1648			lignoceroylcarnitine (C24)*	LC/MS pos late	57515					0.71	1.21	1.71		0.0463	0.0446	0.1933	0.348	0.0142	0.0167		0.9775	0.6931	1.185		100	100	100		Lipid	Fatty Acid Metabolism (Acyl Carnitine, Long Chain Saturated)	100015834		1603	512.467
	1660		Fatty Acid Metabolism (Acyl Carnitine, Monounsaturated)	myristoleoylcarnitine (C14:1)*	LC/MS pos late	48182			90659872		4.48	2.52	0.56		1.6732e-07	9.8084e-06	0.0011	0.0232	0.0057	0.0085		0.3275	1.4658	0.8246		38	100	88		Lipid	Fatty Acid Metabolism (Acyl Carnitine, Monounsaturated)	100006051	889848-55-9	1316	370.295
	1661			palmitoleoylcarnitine (C16:1)*	LC/MS pos late	53223			71464547		2.84	1.71	0.6		0.0022	0.0048	0.0143	0.0822	0.1114	0.077		0.6399	1.8185	1.0955		100	100	100		Lipid	Fatty Acid Metabolism (Acyl Carnitine, Monounsaturated)	100009406		1357	398.326
	1662			oleoylcarnitine (C18:1)	LC/MS pos late	35160		HMDB05065	6441392		2.42	1.82	0.75		0.0009	0.0026	0.0006	0.0194	0.2525	0.1492		0.6411	1.5496	1.1681		100	100	100		Lipid	Fatty Acid Metabolism (Acyl Carnitine, Monounsaturated)	100001501	38677-66-6	1423	426.358
	1663			eicosenoylcarnitine (C20:1)*	LC/MS pos late	57519					2.73	2.72	1		0.0004	0.0015	0.0002	0.0094	0.9081	0.394		0.5178	1.4146	1.4103		100	100	100		Lipid	Fatty Acid Metabolism (Acyl Carnitine, Monounsaturated)	100015838		1484	454.389
	1665			nervonoylcarnitine (C24:1)*	LC/MS pos late	57531					0.98	1.65	1.69		0.6171	0.3296	0.0027	0.0283	0.0085	0.0116		0.84	0.8211	1.3856		88	63	100		Lipid	Fatty Acid Metabolism (Acyl Carnitine, Monounsaturated)	100015846		1602	510.452
	1667		Fatty Acid Metabolism (Acyl Carnitine, Polyunsaturated)	linoleoylcarnitine (C18:2)*	LC/MS pos late	46223		HMDB06469	6450015		1.94	1.68	0.86		0.0012	0.0032	0.0037	0.0333	0.3407	0.1889		0.6928	1.3441	1.1614		100	100	100		Lipid	Fatty Acid Metabolism (Acyl Carnitine, Polyunsaturated)	100003151	36816-10-1	1430	424.342
	1669			dihomo-linoleoylcarnitine (C20:2)*	LC/MS pos late	57520					2.68	2.3	0.86		0.0175	0.0216	0.0025	0.0277	0.9182	0.395		0.4513	1.211	1.0389		25	75	88		Lipid	Fatty Acid Metabolism (Acyl Carnitine, Polyunsaturated)	100015839		1436	452.373
	1670			arachidonoylcarnitine (C20:4)	LC/MS pos late	57518					1.03	1.19	1.15		0.8078	0.4012	0.3668	0.4938	0.4624	0.2442		0.9495	0.9779	1.1283		100	100	100		Lipid	Fatty Acid Metabolism (Acyl Carnitine, Polyunsaturated)	100015837		1353	448.342
	1680		Fatty Acid Metabolism (Acyl Carnitine, Dicarboxylate)	adipoylcarnitine (C6-DC)	LC/MS pos early	52988		HMDB61677	71296139		1.75	1.52	0.87		0.0159	0.0201	0.1091	0.2598	0.4472	0.2375		0.8537	1.4962	1.295		100	100	100		Lipid	Fatty Acid Metabolism (Acyl Carnitine, Dicarboxylate)	100006614		2570	290.16
	1685			pimeloylcarnitine/3-methyladipoylcarnitine (C7-DC)	LC/MS pos early	53224					0.41	1.38	3.34		0.0087	0.013	0.307	0.4706	0.0014	0.0034		1.6044	0.6611	2.2105		100	100	100		Lipid	Fatty Acid Metabolism (Acyl Carnitine, Dicarboxylate)	100009407		2773	304.175
	1690		Fatty Acid Metabolism (Acyl Carnitine, Hydroxy)	(R)-3-hydroxybutyrylcarnitine	LC/MS pos early	43264		HMDB13127	53481617		1.54	2.04	1.33		0.0423	0.0415	0.0015	0.0232	0.1767	0.111		0.7074	1.0888	1.4435		100	100	100		Lipid	Fatty Acid Metabolism (Acyl Carnitine, Hydroxy)	100003926		2400	248.149
	1691			(S)-3-hydroxybutyrylcarnitine	LC/MS pos early	52984		HMDB13127			2.08	1.39	0.67		0.0072	0.0115	0.1261	0.2763	0.1248	0.0846		0.8061	1.674	1.1213		100	100	100		Lipid	Fatty Acid Metabolism (Acyl Carnitine, Hydroxy)	100009271		2340	248.149
	1692			3-hydroxyhexanoylcarnitine (1)	LC/MS pos early	62557					1.51	1.15	0.76		0.0727	0.0627	0.4652	0.5439	0.1963	0.1218		1.0495	1.5875	1.207		88	100	100		Lipid	Fatty Acid Metabolism (Acyl Carnitine, Hydroxy)	100020825		2918	276.181
	1696			3-hydroxypalmitoylcarnitine	LC/MS pos late	61839					1.66	1.67	1		0.0219	0.0255	0.1629	0.3206	0.6073	0.2983		0.7564	1.2594	1.2606		100	100	100		Lipid	Fatty Acid Metabolism (Acyl Carnitine, Hydroxy)	100019800		1380	416.337
	1697			3-hydroxyoleoylcarnitine	LC/MS pos late	61840					1.06	1.29	1.22		0.5954	0.3224	0.4407	0.5262	0.6523	0.3144		0.9813	1.0427	1.2701		100	100	100		Lipid	Fatty Acid Metabolism (Acyl Carnitine, Hydroxy)	100019801		1406	442.353
	1698		Carnitine Metabolism	deoxycarnitine	LC/MS pos early	36747	C01181	HMDB01161	134		0.4	1.09	2.71		1.0529e-05	0.0001	0.7409	0.692	2.8646e-05	0.0003		1.2178	0.4883	1.3244		100	100	100		Lipid	Carnitine Metabolism	100001662	6249-56-5	2052	146.118
	1699			carnitine	LC/MS pos early	15500	C00318	HMDB00062	10917		1.05	1.65	1.58		0.7205	0.3665	0.0001	0.0094	0.0009	0.0027		0.8776	0.9192	1.4512		100	100	100		Lipid	Carnitine Metabolism	100000007	461-05-2	1978	162.112
	1705		Ketone Bodies	3-hydroxybutyrate (BHBA)	LC/MS polar	542	C01089	HMDB00357	441		1.06	1.65	1.56		0.982	0.4517	0.0063	0.0478	0.0436	0.0377		0.8488	0.8977	1.3996		100	100	100		Lipid	Ketone Bodies	254	625-72-9	1480	103.04
	1709		Fatty Acid Metabolism (Acyl Choline)	palmitoylcholine	LC/MS pos late	52944			151731		1.73	1.16	0.67		0.0174	0.0216	0.1811	0.3364	0.0739	0.0556		0.8705	1.5067	1.0098		100	100	100		Lipid	Fatty Acid Metabolism (Acyl Choline)	100009233		1482	342.337
	1710			oleoylcholine	LC/MS pos late	53260					0.98	1.3	1.32		0.8093	0.4012	0.0865	0.2326	0.0296	0.0288		0.9479	0.9324	1.2353		100	100	100		Lipid	Fatty Acid Metabolism (Acyl Choline)	100009331		1449	368.352
	1711			palmitoloelycholine	LC/MS pos late	53257					1.07	1.07	1		0.4784	0.2743	0.4621	0.5435	0.9905	0.4157		0.9825	1.0515	1.0469		100	100	100		Lipid	Fatty Acid Metabolism (Acyl Choline)	100009334		1385	340.321
	1714			linoleoylcholine*	LC/MS pos late	57463					1.01	1.39	1.38		0.6031	0.3254	0.0426	0.1528	0.0151	0.0172		0.9117	0.9239	1.2705		100	100	100		Lipid	Fatty Acid Metabolism (Acyl Choline)	100015760		1388	366.337
	1716			stearoylcholine*	LC/MS pos late	57464					1.46	1.36	0.93		0.496	0.2802	0.3257	0.4774	0.9321	0.3981		0.9199	1.3465	1.2467		100	75	100		Lipid	Fatty Acid Metabolism (Acyl Choline)	100015759		1520	370.368
	1725		Fatty Acid, Monohydroxy	2-hydroxyheptanoate*	LC/MS polar	61827			2750949		0.98	1.6	1.63		0.6795	0.3533	0.0218	0.1094	0.0002	0.0009		0.8077	0.7917	1.2909		100	100	100		Lipid	Fatty Acid, Monohydroxy	100019960		925	145.087
	1730			2-hydroxypalmitate	LC/MS neg	35675		HMDB31057	92836		1.29	1.1	0.85		0.2948	0.1873	0.5908	0.6142	0.5682	0.2848		1.2316	1.5842	1.354		88	100	100		Lipid	Fatty Acid, Monohydroxy	100001579	764-67-0	5511.2	271.228
	1732			2-hydroxystearate	LC/MS neg	17945	C03045		69417		0.93	1.02	1.1		0.8391	0.4125	0.9909	0.7558	0.8581	0.3825		1.3949	1.2909	1.4259		100	100	100		Lipid	Fatty Acid, Monohydroxy	1239	629-22-1	5695	299.259
	1739			3-hydroxyhexanoate	LC/MS polar	53230			151492		1.24	0.95	0.76		0.1719	0.1256	0.8786	0.7351	0.0801	0.0588		0.8955	1.1105	0.848		75	100	88		Lipid	Fatty Acid, Monohydroxy	100006367	10191-24-9	1082	131.071
	1741			3-hydroxysuberate	LC/MS polar	31936		HMDB00325	22328017		1.03	1.07	1.03		0.9024	0.4372	0.9809	0.7522	0.938	0.3989		0.998	1.0318	1.0658		100	100	100		Lipid	Fatty Acid, Monohydroxy	100001143	73141-47-6	3000	189.077
	1742			3-hydroxydecanoate	LC/MS neg	22053		HMDB02203	26612		0.95	1.25	1.32		0.6196	0.3297	0.6077	0.6165	0.8886	0.3901		1.5217	1.4446	1.906		100	100	100		Lipid	Fatty Acid, Monohydroxy	100000997	5561-87-5	4634.7	187.134
	1747			3-hydroxypalmitate	LC/MS neg	27503		HMDB10734	301590		2.13	1.5	0.7		0.0542	0.0507	0.3808	0.4979	0.3318	0.1854		0.8631	1.842	1.2918		100	100	100		Lipid	Fatty Acid, Monohydroxy	100000983	928-17-6	5476	271.228
	1749			3-hydroxyoleate*	LC/MS neg	61843					1.54	1.19	0.77		0.0296	0.0319	0.5528	0.6024	0.1784	0.1117		0.8266	1.2739	0.9862		100	100	100		Lipid	Fatty Acid, Monohydroxy	100019966		5508	297.244
	1760			16-hydroxypalmitate	LC/MS neg	39609	C18218	HMDB06294	10466		0.86	0.82	0.96		0.3286	0.204	0.1983	0.3525	0.8952	0.3904		1.169	0.9998	0.9593		100	100	100		Lipid	Fatty Acid, Monohydroxy	100002953	506-13-8	5236.2	271.228
	1764			13-HODE + 9-HODE	LC/MS neg	37752			43013		1.63	1.5	0.92		0.0319	0.0338	0.0804	0.22	0.5892	0.2912		0.7185	1.1691	1.075		100	100	100		Lipid	Fatty Acid, Monohydroxy	100002196		5275	295.228
	1778			3-hydroxystearate	LC/MS neg	52938			5282907		1.8	1.44	0.8		0.0464	0.0446	0.08	0.22	0.502	0.2582		0.8732	1.5721	1.2549		100	100	100		Lipid	Fatty Acid, Monohydroxy	100008933	45261-96-9	5674	299.259
	1789		Fatty Acid, Dihydroxy	12,13-DiHOME	LC/MS neg	38395	C14829	HMDB04705	10236635		0.96	0.75	0.78		0.9213	0.4438	0.2034	0.3566	0.2145	0.1297		1.1906	1.1476	0.8981		100	100	100		Lipid	Fatty Acid, Dihydroxy	62	263399-35-5	5137	313.238
	1790			9,10-DiHOME	LC/MS neg	38399	C14828	HMDB04704	9966640		1.15	1.03	0.9		0.435	0.2539	0.9184	0.7396	0.4684	0.2461		0.8964	1.0264	0.9198		100	100	100		Lipid	Fatty Acid, Dihydroxy	179	263399-34-4	5180	313.238
	1792			2S,3R-dihydroxybutyrate	LC/MS polar	62950		HMDB02453	10964471		2.72	1.35	0.5		0.0387	0.0394	0.488	0.5619	0.1303	0.0869		0.7113	1.9313	0.9604		100	88	75		Lipid	Fatty Acid, Dihydroxy	100002284	5057-93-2	1660	119.035
	1793			2R,3R-dihydroxybutyrate	LC/MS polar	63109		HMDB00498			1.1	0.86	0.78		0.8986	0.4363	0.2318	0.3954	0.2791	0.1628		1.1185	1.2318	0.9601		100	100	75		Lipid	Fatty Acid, Dihydroxy	100002367	759-06-8	1543	119.035
	1801			14,15-DiHETrE	LC/MS neg	46305	C14775	HMDB02265	5283147		0.66	0.62	0.94		0.0019	0.0043	0.002	0.0246	0.4075	0.2208		1.396	0.9177	0.8627		100	100	100		Lipid	Fatty Acid, Dihydroxy	100002752	77667-09-5	5188	337.238
	1883		Eicosanoid	12-HETE	LC/MS neg	37536		HMDB06111	5312983		3.37	0.74	0.22		0.0113	0.0156	0.3086	0.4706	0.0022	0.0044		1.158	3.9075	0.8542		100	100	100		Lipid	Eicosanoid	100002167	71030-37-0;73837-14-6	5326	319.228
	1890			12-HHTrE	LC/MS neg	57393	C20388	HMDB12535	5283141		1.27	0.76	0.6		0.2404	0.1593	0.0868	0.2326	0.0156	0.0176		0.9727	1.2317	0.7406		100	100	100		Lipid	Eicosanoid	1261	54397-84-1	5175	279.197
	1897		Endocannabinoid	oleoyl ethanolamide	LC/MS pos late	38102		HMDB02088	5283454		1.5	0.83	0.55		0.0149	0.0194	0.201	0.3556	0.001	0.0027		0.9705	1.4568	0.8043		100	100	100		Lipid	Endocannabinoid	1137	11-58-0;111-58-0	1661	326.305
	1900			palmitoyl ethanolamide	LC/MS neg	38165	C16512	HMDB02100	4671		1.4	0.95	0.68		0.1279	0.1	0.9984	0.7558	0.0851	0.0616		1.1238	1.5686	1.0632		100	100	100		Lipid	Endocannabinoid	1489	544-31-0	6300	298.275
	1911			N-stearoyltaurine	LC/MS neg	39730			168274		4.22	1.34	0.32		4.5858e-05	0.0003	0.6553	0.6416	0.0008	0.0025		0.3674	1.5517	0.4919		25	100	50		Lipid	Endocannabinoid	100003240	63155-80-6	5782	390.268
	1937		Inositol Metabolism	myo-inositol	LC/MS polar	1124	C00137	HMDB00211	892		0.65	0.73	1.12		0.0016	0.004	0.0196	0.0994	0.4073	0.2208		1.3121	0.8495	0.9554		100	100	100		Lipid	Inositol Metabolism	363	87-89-8	3506.3	225.062
	1946			inositol 1-phosphate (I1P)	LC/MS polar	43849	C01177	HMDB00213	440194		0.4	1.26	3.18		0.0016	0.0038	0.2303	0.3954	0.0002	0.0009		1.0574	0.4188	1.3318		100	75	100		Lipid	Inositol Metabolism	370	573-35-3;106032-59-1	4785	259.022
	1966		Phospholipid Metabolism	choline	LC/MS pos early	15506	C00114	HMDB00097	305		0.72	0.86	1.2		0.0129	0.0173	0.2395	0.3999	0.5185	0.2648		1.1572	0.8274	0.993		100	100	100		Lipid	Phospholipid Metabolism	1256	67-48-1	1961	104.107
	1967			choline phosphate	LC/MS pos early	34396	C00588	HMDB01565	1014		0.66	1.23	1.86		0.0091	0.0133	0.2368	0.3982	0.0033	0.0059		1.0872	0.7183	1.3336		100	100	100		Lipid	Phospholipid Metabolism	267	72556-74-2	700	184.073
	1968			cytidine 5'-diphosphocholine	LC/MS pos early	34418	C00307	HMDB01413	13804		1.46	1.9	1.3		0.7787	0.3902	0.1597	0.3175	0.3755	0.2066		0.7131	1.0405	1.3548		88	75	100		Lipid	Phospholipid Metabolism	1220	33818-15-4	725	489.115
	1970			glycerophosphorylcholine (GPC)	LC/MS pos early	15990	C00670	HMDB00086	71920		0.8	0.78	0.97		0.0023	0.0049	0.0002	0.0107	0.6391	0.3101		1.1886	0.9499	0.9212		100	100	100		Lipid	Phospholipid Metabolism	100000269	28319-77-9	672	258.11
	1972			phosphoethanolamine	LC/MS neg	1600	C00346	HMDB00224	1015		2.29	1.47	0.64		1.6354e-06	4.1942e-05	0.1509	0.306	0.015	0.0172		0.8646	1.9812	1.2712		100	100	100		Lipid	Phospholipid Metabolism	1026	1071-23-4	638	140.012
	1973			cytidine-5'-diphosphoethanolamine	LC/MS polar	34410	C00570	HMDB01564	123727		0.99	1.21	1.22		0.6674	0.3486	0.6243	0.6191	0.8803	0.3886		1.0531	1.0438	1.276		88	100	100		Lipid	Phospholipid Metabolism	100001407	72842-05-8	4210	445.053
	1974			glycerophosphoethanolamine	LC/MS polar	37455	C01233	HMDB00114	123874		0.99	0.72	0.73		0.9272	0.4438	0.0057	0.0459	0.0045	0.0075		1.1365	1.1213	0.8132		100	100	100		Lipid	Phospholipid Metabolism	100001620	33049-08-0	3075	214.049
	1975			glycerophosphoserine*	LC/MS pos early	57404			3081457		0.98	0.94	0.95		0.9197	0.4438	0.533	0.5879	0.5251	0.2669		1.0273	1.0109	0.9653		100	100	100		Lipid	Phospholipid Metabolism	100015666		577	260.053
	1976			glycerophosphoinositol*	LC/MS polar	47155			167572		0.69	0.66	0.95		4.6891e-05	0.0003	2.6599e-06	0.0005	0.506	0.2597		1.3888	0.9576	0.9126		100	100	100		Lipid	Phospholipid Metabolism	100001621	16824-65-0	3850	333.059
	1977			trimethylamine N-oxide	LC/MS pos early	40406	C01104	HMDB00925	1145		0.72	1.08	1.5		0.1377	0.1062	0.9611	0.7522	0.1647	0.1043		1.2139	0.875	1.3144		88	50	100		Lipid	Phospholipid Metabolism	100003397	1184-78-7	2100	76.0757
	2202		Glycosyl PE	1-palmitoyl-2-linoleoyl-glycosyl-GPE (16:0/18:2)**	LC/MS pos late	63197					0.75	0.95	1.27		0.1534	0.1152	0.9488	0.7499	0.153	0.0981		1.1515	0.8606	1.0966		100	100	100		Lipid	Glycosyl PE	100021393		2258	878.575
	2203			1-palmitoyl-2-arachidonoyl-glycosyl-GPE (16:0/20:4)**	LC/MS pos late	63195					0.62	0.79	1.29		0.0125	0.0168	0.166	0.3234	0.1211	0.0829		1.1599	0.7134	0.9181		100	63	100		Lipid	Glycosyl PE	100021395		2180	902.575
	2204			1-palmitoyl-2-docosahexaenoyl-glycosyl-GPE (16:0/22:6)**	LC/MS pos late	63196					0.59	0.95	1.6		0.0652	0.0591	0.9903	0.7558	0.0576	0.0464		1.2089	0.7175	1.1471		100	100	100		Lipid	Glycosyl PE	100021397		2098	926.575
	2208			1-stearoyl-2-linoleoyl-glycosyl-GPE (18:0/18:2)**	LC/MS pos late	63192					0.45	1.01	2.24		0.0098	0.0142	0.7533	0.6946	0.0073	0.0103		1.2348	0.5545	1.2416		100	50	100		Lipid	Glycosyl PE	100021403		2516	906.607
	2209			1-stearoyl-2-arachidonoyl-glycosyl-GPE (18:0/20:4)**	LC/MS pos late	63193					0.61	0.92	1.51		0.0706	0.062	0.8283	0.7132	0.079	0.0582		1.2202	0.7486	1.1272		100	100	100		Lipid	Glycosyl PE	100021404		2423	930.607
	2210			1-stearoyl-2-docosahexaenoyl-glycosyl-GPE (18:0/22:6)**	LC/MS pos late	63194					0.6	0.96	1.6		0.084	0.0704	0.8881	0.7351	0.0633	0.0495		1.2106	0.722	1.1577		100	100	100		Lipid	Glycosyl PE	100021405		2316	954.607
	2222		Phosphatidylserine (PS)	1-stearoyl-2-oleoyl-GPS (18:0/18:1)	LC/MS pos late	19265		HMDB10163	9547087		1.86	0.83	0.45		0.0157	0.0201	0.5022	0.5692	0.0018	0.0038		0.9327	1.7373	0.7744		100	100	100		Lipid	Phosphatidylserine (PS)	100000639		3000	790.559
	2225			1-stearoyl-2-arachidonoyl-GPS (18:0/20:4)	LC/MS pos late	52235		HMDB12383			1.15	1.06	0.93		0.3078	0.1935	0.4543	0.5391	0.5779	0.2877		0.9412	1.078	1.0019		100	100	100		Lipid	Phosphatidylserine (PS)	100001872		2565	812.544
	2235		Phosphatidylglycerol (PG)	1-palmitoyl-2-oleoyl-GPG (16:0/18:1)	LC/MS pos late	52448			5283509		1.07	0.82	0.77		0.5615	0.3113	0.0986	0.2534	0.0273	0.0268		1.0809	1.1563	0.89		100	100	100		Lipid	Phosphatidylglycerol (PG)	100000641		3206	766.559
	2236			1-palmitoyl-2-linoleoyl-GPG (16:0/18:2)	LC/MS polar	52628		HMDB10575			0.62	0.94	1.52		4.8124e-06	7.0528e-05	0.4079	0.5137	7.9633e-05	0.0005		1.1626	0.7177	1.0909		100	100	100		Lipid	Phosphatidylglycerol (PG)	1543	322647-44-9	717	745.503
	2397		Lysophospholipid	1-palmitoyl-GPS (16:0)*	LC/MS neg	46130			9547100		1.59	1.58	0.99		0.1295	0.1007	0.1502	0.306	0.8903	0.3901		0.9178	1.4618	1.4464		100	100	100		Lipid	Lysophospholipid	100005805		5572	496.268
	2398			1-stearoyl-GPS (18:0)*	LC/MS pos late	45966			9547101		1.07	1.24	1.16		0.6037	0.3254	0.1028	0.2557	0.2153	0.1298		0.8496	0.9115	1.054		100	100	100		Lipid	Lysophospholipid	100004327		1634	526.314
	2404			1-palmitoyl-GPG (16:0)*	LC/MS neg	45970			3300276		1.14	0.81	0.71		0.6996	0.3613	0.5752	0.6102	0.338	0.1884		1.4741	1.6822	1.199		100	100	100		Lipid	Lysophospholipid	100005717		5570	483.273
	2406			1-stearoyl-GPG (18:0)	LC/MS neg	34437					0.9	1.04	1.16		0.6472	0.3397	0.7956	0.7039	0.4692	0.2461		1.1168	1.0062	1.1651		88	63	88		Lipid	Lysophospholipid	100001462		5816	511.304
	2408			1-oleoyl-GPG (18:1)*	LC/MS neg	45968					1.23	0.97	0.79		0.4121	0.2447	0.7705	0.7016	0.5362	0.2719		1.2019	1.4795	1.1641		88	88	100		Lipid	Lysophospholipid	100005716		5610	509.288
	2410			1-linoleoyl-GPG (18:2)*	LC/MS neg	54885					1.63	1.27	0.78		0.1705	0.1249	0.3515	0.4877	0.5569	0.2804		0.6091	0.991	0.7727		38	63	63		Lipid	Lysophospholipid	100009227		5516	507.273
	2532		Glycerolipid Metabolism	glycerol	LC/MS neg	15122	C00116	HMDB00131	753		1.22	1.02	0.84		0.2246	0.1522	0.8527	0.7217	0.2771	0.1621		0.9426	1.154	0.9643		100	100	100		Lipid	Glycerolipid Metabolism	1254	56-81-5	758	91.0401
	2533			glycerol 3-phosphate	LC/MS pos early	43847	C00093	HMDB00126	754		0.96	1.11	1.16		0.8841	0.4301	0.5581	0.6047	0.4633	0.2442		1.1052	1.0637	1.2309		100	100	100		Lipid	Glycerolipid Metabolism	100000258	29849-82-9	580	173.021
	2538			glycerophosphoglycerol	LC/MS polar	48857	C03274		439964		0.35	0.8	2.32		0.0001	0.0005	0.3438	0.484	4.8291e-06	0.0001		1.5348	0.5302	1.229		100	100	100		Lipid	Glycerolipid Metabolism	100001619		2430	245.043
	2685		Sphingolipid Synthesis	sphinganine	LC/MS pos late	17769	C00836	HMDB00269	3126		3.29	1.31	0.4		1.4547e-06	4.1942e-05	0.1304	0.2816	2.1119e-05	0.0002		0.7106	2.339	0.9286		100	100	100		Lipid	Sphingolipid Synthesis	313	3102-56-5	1413	302.305
	2687			sphingadienine	LC/MS pos late	57426			6449795		1.14	0.78	0.68		0.5077	0.2834	0.0057	0.0459	0.0333	0.0313		1.155	1.3221	0.8973		100	100	100		Lipid	Sphingolipid Synthesis	100015643	25696-03-1	1350	298.274
	2688			phytosphingosine	LC/MS pos late	1510	C12144	HMDB04610	122121		0.61	0.73	1.2		0.0008	0.0023	0.007	0.0494	0.1364	0.0896		1.2652	0.7711	0.9262		100	100	100		Lipid	Sphingolipid Synthesis	469	554-62-1	1367	318.3
	2836		Sphingosines	sphingosine	LC/MS pos late	17747	C00319	HMDB00252	5353955		1.93	1.04	0.54		5.7112e-05	0.0003	0.6051	0.6161	7.7836e-05	0.0005		0.9192	1.7732	0.9598		100	100	100		Lipid	Sphingosines	297	123-78-4	1393	300.29
	2845			heptadecasphingosine (d17:1)	LC/MS pos late	57427			5283557		1.19	0.84	0.7		0.1952	0.1374	0.1047	0.2557	0.0095	0.0125		1.0433	1.2409	0.8715		100	100	100		Lipid	Sphingosines	100015724	6918-48-5	1377	286.274
	2846			eicosanoylsphingosine (d20:1)*	LC/MS pos late	57597					1.31	1.01	0.77		0.0275	0.03	0.7434	0.6926	0.0024	0.0047		0.9068	1.1905	0.9178		88	100	100		Lipid	Sphingosines	100015870		1443	328.321
	2854		Mevalonate Metabolism	3-hydroxy-3-methylglutarate	LC/MS polar	531	C03761	HMDB00355	1662		1.74	1.84	1.06		0.0017	0.0041	0.0033	0.031	0.843	0.3765		0.6824	1.188	1.2543		100	100	100		Lipid	Mevalonate Metabolism	112	503-49-1	2850	161.046
	2869		Sterol	cholesterol	LC/MS pos late	63	C00187	HMDB00067	11025495		0.94	0.99	1.04		0.4996	0.2803	0.916	0.7396	0.4822	0.2511		1.0336	0.9758	1.0194		100	100	100		Lipid	Sterol	266	57-88-5	2707	369.352
	2880			7-alpha-hydroxy-3-oxo-4-cholestenoate (7-Hoca)	LC/MS neg	36776	C17337	HMDB12458	3081085		0.55	0.83	1.49		0.1897	0.1347	0.8237	0.7132	0.2021	0.124		1.5999	0.8867	1.3222		100	100	100		Lipid	Sterol	100001609	115538-85-7	5288.1	429.301
	2894			beta-sitosterol	LC/MS pos late	27414	C01753	HMDB00852	222284		0.4	0.68	1.69		3.2545e-05	0.0002	0.0008	0.0231	0.0018	0.0039		1.4896	0.6027	1.019		100	100	100		Lipid	Sterol	100001033	83-46-5	3054	397.383
	2897			campesterol	LC/MS pos late	33997	C01789	HMDB02869	173183		0.55	0.8	1.46		0.0002	0.001	0.0143	0.0822	0.0049	0.008		1.2518	0.6902	1.0045		100	100	100		Lipid	Sterol	100001269	474-62-4	2873	383.367
	2914			7-hydroxycholesterol (alpha or beta)	LC/MS pos late	47890		HMDB06119	107722		0.95	1.79	1.87		0.982	0.4517	0.0065	0.0482	0.0011	0.003		0.7991	0.7622	1.429		100	100	100		Lipid	Sterol	100005999		1930	367.336
	2970		Corticosteroids	corticosterone	LC/MS neg	5983	C02140	HMDB01547	5753		4.58	1.11	0.24		4.5333e-06	7.0528e-05	0.3506	0.4877	3.3133e-07	1.7684e-05		0.2742	1.2556	0.3037		13	100	13		Lipid	Corticosteroids	272	50-22-6	5040	345.207
	3076		Primary Bile Acid Metabolism	cholate	LC/MS neg	22842	C00695	HMDB00619	221493		0.57	0.84	1.48		0.0525	0.0496	0.5808	0.6105	0.0995	0.0701		1.1533	0.6527	0.9675		100	88	100		Lipid	Primary Bile Acid Metabolism	136	81-25-4	5165	407.28
	3077			glycocholate	LC/MS neg	18476	C01921	HMDB00138	10140		1.19	0.93	0.78		0.4991	0.2803	0.7041	0.6706	0.3126	0.1766		0.9891	1.1738	0.9168		100	100	100		Lipid	Primary Bile Acid Metabolism	342	475-31-0;863-57-0	5163	464.302
	3078			taurocholate	LC/MS neg	18497	C05122	HMDB00036	6675		0.6	1.11	1.86		0.1437	0.1098	0.5825	0.6105	0.0344	0.0316		1.1013	0.6612	1.2273		100	100	100		Lipid	Primary Bile Acid Metabolism	1648	145-42-6	5150	514.284
	3079			chenodeoxycholate	LC/MS neg	1563	C02528	HMDB00518	10133		0.91	0.85	0.93		0.5679	0.3126	0.3776	0.4979	0.8024	0.3645		1.1909	1.0876	1.0134		100	100	100		Lipid	Primary Bile Acid Metabolism	1123	474-24-9;474-25-9	5264	391.285
	3084			glycochenodeoxycholate	LC/MS neg	32346	C05466	HMDB00637	12544		1.6	0.82	0.52		0.0197	0.0237	0.337	0.4814	0.0013	0.0034		1.0012	1.599	0.8253		88	100	100		Lipid	Primary Bile Acid Metabolism	1628	16564-43-5	5236.1	448.307
	3085			taurochenodeoxycholate	LC/MS neg	18494	C05465	HMDB00951	387316		1.04	0.99	0.96		0.9394	0.4458	0.9429	0.7484	0.8885	0.3901		1.0826	1.1233	1.0766		100	100	100		Lipid	Primary Bile Acid Metabolism	1629	6009-98-9	5250	498.289
	3086			beta-muricholate	LC/MS neg	31885	C17726	HMDB00415	5283853		0.41	1.38	3.4		0.0181	0.0221	0.3738	0.4973	0.0018	0.0038		1.308	0.5307	1.8056		100	100	100		Lipid	Primary Bile Acid Metabolism	100001066	2393-59-1	4794	407.28
	3087			alpha-muricholate	LC/MS neg	34092	C17647	HMDB00506	3083761		0.41	0.85	2.09		0.0036	0.007	0.2722	0.4394	0.0342	0.0316		1.3043	0.5292	1.1067		100	100	100		Lipid	Primary Bile Acid Metabolism	100001280	2393-58-0	4765	407.28
	3088			tauro-alpha-muricholate	LC/MS neg	42605					0.5	1.07	2.14		0.0153	0.0198	0.9306	0.743	0.0144	0.0168		1.2457	0.6228	1.3326		100	100	100		Lipid	Primary Bile Acid Metabolism	100004064		4745	514.284
	3089			tauro-beta-muricholate	LC/MS neg	33983		HMDB00932	168408		0.29	1.25	4.4		0.0026	0.0053	0.3322	0.4774	2.3898e-05	0.0002		1.228	0.35	1.5386		100	100	100		Lipid	Primary Bile Acid Metabolism	100001250	25696-60-0	4774	514.284
	3108		Secondary Bile Acid Metabolism	taurodeoxycholate	LC/MS neg	12261	C05463	HMDB00896	2733768		0.56	0.35	0.61		0.022	0.0255	0.0001	0.0094	0.0922	0.0663		1.7429	0.9816	0.6019		100	100	100		Lipid	Secondary Bile Acid Metabolism	1668	207737-97-1	5257.4	498.289
	3111			6-beta-hydroxylithocholate	LC/MS neg	36807	C15515	HMDB00811	5283821		0.35	0.85	2.45		0.0003	0.0013	0.3329	0.4774	0.0033	0.0059		1.4833	0.513	1.259		100	100	100		Lipid	Secondary Bile Acid Metabolism	100001625	668-49-5	4830	391.285
	3119			taurolithocholate	LC/MS neg	31889	C02592	HMDB00722	10595		0.51	0.47	0.92		0.2854	0.1833	0.1914	0.3475	0.7138	0.3387		1.674	0.8577	0.7918		75	63	75		Lipid	Secondary Bile Acid Metabolism	100001065	516-90-5	5345	482.295
	3122			ursodeoxycholate	LC/MS neg	1605	C07880	HMDB00946	31401		0.56	1.02	1.83		0.0253	0.0283	0.727	0.6816	0.0627	0.0494		1.217	0.6815	1.2444		100	88	100		Lipid	Secondary Bile Acid Metabolism	1135	128-13-2	5055	391.285
	3134			tauroursodeoxycholate	LC/MS neg	39378		HMDB00874	9848818		0.43	0.96	2.23		0.0058	0.0102	0.8843	0.7351	0.0063	0.0091		1.2986	0.5605	1.2507		100	100	100		Lipid	Secondary Bile Acid Metabolism	100002912	14605-22-2	5025	498.289
	3143			taurohyocholate*	LC/MS neg	42603					0.58	0.72	1.24		0.0802	0.0677	0.3028	0.4672	0.3956	0.2162		0.9575	0.5576	0.6939		75	25	50		Lipid	Secondary Bile Acid Metabolism	100004084		5000	514.284
	3145			taurohyodeoxycholic acid	LC/MS neg	43588			119046		0.2	0.73	3.72		0.0004	0.0015	0.332	0.4774	0.006	0.0088		1.2906	0.2522	0.9377		100	38	88		Lipid	Secondary Bile Acid Metabolism	100003869	38411-85-7	5073	498.289
	3153			7-ketodeoxycholate	LC/MS neg	31904		HMDB00391	188292		0.78	2.26	2.89		0.1982	0.1387	0.1173	0.2724	0.0121	0.0148		1.1085	0.8678	2.5078		100	100	100		Lipid	Secondary Bile Acid Metabolism	100001063	911-40-0	4821	405.265
	3158			taurochenodeoxycholic acid (7 or 24)-sulfate	LC/MS neg	52976					0.27	0.77	2.85		2.4094e-05	0.0002	0.2885	0.4524	3.336e-05	0.0003		1.4208	0.3861	1.0995		100	38	100		Lipid	Secondary Bile Acid Metabolism	100006643		4928	288.62
	3162			ursocholate	LC/MS neg	57573					0.57	0.57	1		0.0307	0.0328	0.0307	0.1286				1.1295	0.6451	0.6451		88	0	0		Lipid	Secondary Bile Acid Metabolism	100002913	2955-27-3	4648	407.28
	3731	Nucleotide	Purine Metabolism, (Hypo)Xanthine/Inosine containing	inosine 5'-monophosphate (IMP)	LC/MS pos early	2133	C00130	HMDB00175	8582		0.26	1	3.79		2.5239e-05	0.0002	0.7934	0.7039	2.6353e-06	8.0374e-05		1.3846	0.3635	1.3779		100	100	100		Nucleotide	Purine Metabolism, (Hypo)Xanthine/Inosine containing	362	4691-65-0	650	349.054
	3732			inosine	LC/MS neg	1123	C00294	HMDB00195	6021		0.78	0.65	0.83		0.2708	0.176	0.0611	0.1872	0.41	0.2216		1.3925	1.0837	0.9003		100	100	100		Nucleotide	Purine Metabolism, (Hypo)Xanthine/Inosine containing	361	58-63-9	1602.1	267.073
	3733			hypoxanthine	LC/MS neg	3127	C00262	HMDB00157	790		1.06	0.67	0.63		0.8126	0.402	0.1074	0.2573	0.0644	0.0502		1.2073	1.2802	0.8062		100	100	100		Nucleotide	Purine Metabolism, (Hypo)Xanthine/Inosine containing	171	68-94-0	1291.2	135.031
	3734			xanthine	LC/MS polar	3147	C00385	HMDB00292	1188		0.93	0.9	0.96		0.4446	0.2574	0.2337	0.3954	0.7357	0.3461		1.0501	0.9794	0.9442		100	100	100		Nucleotide	Purine Metabolism, (Hypo)Xanthine/Inosine containing	1004	69-89-6	2023	151.026
	3736			xanthosine	LC/MS neg	15136	C01762	HMDB00299	64959		0.44	0.99	2.24		0.0103	0.0146	0.822	0.7132	0.0068	0.0097		1.152	0.5118	1.1441		100	100	100		Nucleotide	Purine Metabolism, (Hypo)Xanthine/Inosine containing	100000299	146-80-5	1075	283.068
	3744			allantoin	LC/MS polar	1107	C02350	HMDB00462	204		0.76	1.16	1.54		0.0526	0.0496	0.1016	0.2545	0.0054	0.0083		1.0231	0.7743	1.1909		100	100	100		Nucleotide	Purine Metabolism, (Hypo)Xanthine/Inosine containing	1002	97-59-6	1672	157.037
	3745			allantoic acid	LC/MS polar	33434	C00499	HMDB01209	203		0.56	1.14	2.04		0.0158	0.0201	0.384	0.4979	0.0069	0.0098		1.1476	0.6373	1.3027		100	100	100		Nucleotide	Purine Metabolism, (Hypo)Xanthine/Inosine containing	218	99-16-1	2960	175.047
	3750		Purine Metabolism, Adenine containing	adenosine 5'-monophosphate (AMP)	LC/MS pos early	32342	C00020	HMDB00045	6083		0.81	1.19	1.47		0.0928	0.0766	0.0652	0.1905	0.0016	0.0037		0.9851	0.7964	1.1681		100	100	100		Nucleotide	Purine Metabolism, Adenine containing	209	149022-20-8	1013	348.07
	3751			adenosine 3'-monophosphate (3'-AMP)	LC/MS neg	35142	C01367	HMDB03540	41211		1.23	0.5	0.41		0.9515	0.4458	0.3251	0.4774	0.2985	0.1709		1.5461	1.9024	0.7759		88	75	50		Nucleotide	Purine Metabolism, Adenine containing	100001449	84-21-9	1245	346.056
	3752			adenosine 2'-monophosphate (2'-AMP)	LC/MS neg	36815	C00946	HMDB11617	94136		0.81	1.25	1.53		0.2988	0.1894	0.1783	0.3355	0.0305	0.0293		1.013	0.8248	1.2648		100	100	100		Nucleotide	Purine Metabolism, Adenine containing	100001694	130-49-4	1497.7	346.056
	3755			adenosine 3',5'-diphosphate	LC/MS neg	15691	C00054	HMDB00061	159296		1.4	1.75	1.25		0.2709	0.176	0.0904	0.2404	0.5165	0.2644		0.8112	1.1319	1.4168		100	100	100		Nucleotide	Purine Metabolism, Adenine containing	1214	75431-54-8	575	426.022
	3756			adenylosuccinate	LC/MS neg	18360	C03794	HMDB00536	195		0.91	1.6	1.76		0.9499	0.4458	0.1329	0.2816	0.0985	0.0699		0.6564	0.5975	1.0519		63	50	88		Nucleotide	Purine Metabolism, Adenine containing	1303	19046-78-7	560	230.53
	3757			adenosine	LC/MS pos early	555	C00212	HMDB00050	60961		0.56	1.03	1.84		0.0019	0.0044	0.6089	0.6165	0.0004	0.0015		1.0643	0.5983	1.0988		100	100	100		Nucleotide	Purine Metabolism, Adenine containing	798	58-61-7	2169	268.104
	3758			adenine	LC/MS pos early	554	C00147	HMDB00034	190		0.38	0.82	2.17		5.8792e-06	7.6589e-05	0.0354	0.1365	3.4706e-05	0.0003		1.327	0.4989	1.0844		100	100	100		Nucleotide	Purine Metabolism, Adenine containing	880	73-24-5	2221	136.062
	3763			N1-methyladenosine	LC/MS pos early	15650	C02494	HMDB03331	27476		0.64	0.56	0.88		0.1173	0.0933	0.0516	0.17	0.7783	0.3573		1.6064	1.0245	0.9053		100	75	63		Nucleotide	Purine Metabolism, Adenine containing	1242	15763-06-1	2120	282.12
	3784			N6-succinyladenosine	LC/MS polar	48130		HMDB00912	165243		1.81	1.5	0.83		0.139	0.1069	0.0498	0.1672	0.8961	0.3904		0.6086	1.1026	0.9159		38	63	63		Nucleotide	Purine Metabolism, Adenine containing	100001664	4542-23-8	3421	382.1
	3787		Purine Metabolism, Guanine containing	guanosine 5'- monophosphate (5'-GMP)	LC/MS pos early	2849	C00144	HMDB01397	6804		0.74	1.29	1.75		0.0805	0.0677	0.0456	0.1548	0.0005	0.0019		1.0006	0.7401	1.294		100	100	100		Nucleotide	Purine Metabolism, Guanine containing	347	5550-12-09	800	364.065
	3792			guanosine	LC/MS neg	1573	C00387	HMDB00133	6802		0.89	0.96	1.09		0.402	0.2408	0.9256	0.7423	0.2365	0.1414		1.0493	0.9306	1.0106		100	100	100		Nucleotide	Purine Metabolism, Guanine containing	1099	118-00-3	1662	282.084
	3793			guanine	LC/MS pos early	32352	C00242	HMDB00132	764		1.63	0.82	0.51		0.1606	0.1188	0.7737	0.7023	0.0565	0.0461		1.1892	1.9343	0.9778		100	100	100		Nucleotide	Purine Metabolism, Guanine containing	172	73-40-5	2032	152.057
	3812		Pyrimidine Metabolism, Orotate containing	N-carbamoylaspartate	LC/MS polar	1594	C00438	HMDB00828	93072		0.99	1.85	1.87		0.9219	0.4438	0.0365	0.138	0.0323	0.0307		0.9416	0.93	1.7379		100	100	100		Nucleotide	Pyrimidine Metabolism, Orotate containing	1108	923-37-5	3800	175.036
	3813			dihydroorotate	LC/MS polar	601	C00337	HMDB03349	648		0.42	1.63	3.93		0.0592	0.0549	0.092	0.2432	0.0005	0.0019		1.2895	0.5353	2.104		100	100	100		Nucleotide	Pyrimidine Metabolism, Orotate containing	923	155-54-4	1910	157.025
	3814			orotate	LC/MS polar	1505	C00295	HMDB00226	967		0.67	1.48	2.21		0.0806	0.0677	0.1515	0.306	0.0115	0.0144		0.9987	0.6691	1.4798		100	100	100		Nucleotide	Pyrimidine Metabolism, Orotate containing	445	50887-69-9	1638.1	155.01
	3816			orotidine	LC/MS polar	35172		HMDB00788	92751		1.11	0.91	0.83		0.8599	0.4201	0.4128	0.5153	0.6929	0.3302		1.1072	1.2242	1.0124		100	100	100		Nucleotide	Pyrimidine Metabolism, Orotate containing	100001416	314-50-1	2250	287.052
	3821		Pyrimidine Metabolism, Uracil containing	uridine 5'-monophosphate (UMP)	LC/MS neg	2856	C00105	HMDB00288	6030		0.7	1.14	1.63		0.0227	0.0261	0.1919	0.3475	0.0038	0.0067		1.1024	0.7746	1.2617		100	100	100		Nucleotide	Pyrimidine Metabolism, Uracil containing	869	3387-36-8	627	323.029
	3826			uridine	LC/MS neg	606	C00299	HMDB00296	6029		0.8	0.92	1.14		0.2222	0.151	0.7276	0.6816	0.1357	0.0896		1.1019	0.8866	1.0088		100	100	100		Nucleotide	Pyrimidine Metabolism, Uracil containing	535	58-96-8	1457.6	243.062
	3827			uracil	LC/MS polar	605	C00106	HMDB00300	1174		1.39	0.66	0.47		0.1083	0.0883	0.0693	0.1995	0.0012	0.0031		1.1648	1.624	0.771		100	100	100		Nucleotide	Pyrimidine Metabolism, Uracil containing	825	66-22-8	1089.7	111.02
	3828			pseudouridine	LC/MS neg	33442	C02067	HMDB00767	15047		1.79	0.99	0.55		0.0405	0.0404	0.6392	0.6322	0.0365	0.0328		0.8936	1.603	0.8846		100	88	100		Nucleotide	Pyrimidine Metabolism, Uracil containing	821	1445-07-4	1100	243.062
	3845			3-ureidopropionate	LC/MS pos early	3155	C02642	HMDB00026	111		0.97	1.15	1.18		0.6712	0.3498	0.5852	0.6118	0.4144	0.2228		1.0231	0.9919	1.1722		100	100	100		Nucleotide	Pyrimidine Metabolism, Uracil containing	1053	462-88-4	875	133.061
	3846			beta-alanine	LC/MS pos early	55	C00099	HMDB00056	239		0.48	0.97	2.04		0.0192	0.0232	0.8829	0.7351	0.0084	0.0115		1.4989	0.7155	1.4568		100	100	100		Nucleotide	Pyrimidine Metabolism, Uracil containing	244	56-41-7;107-95-9	1905	90.055
	3853		Pyrimidine Metabolism, Cytidine containing	cytidine 5'-monophosphate (5'-CMP)	LC/MS pos early	2372	C00055	HMDB00095	6131		0.89	1.17	1.32		0.231	0.1547	0.0722	0.2047	0.0055	0.0083		0.9848	0.8726	1.1556		100	100	100		Nucleotide	Pyrimidine Metabolism, Cytidine containing	282	63-37-6	835	324.059
	3857			cytidine	LC/MS pos early	514	C00475	HMDB00089	6175		0.94	0.82	0.87		0.6929	0.3587	0.132	0.2816	0.1259	0.0849		1.0898	1.0242	0.8934		100	100	100		Nucleotide	Pyrimidine Metabolism, Cytidine containing	827	65-46-3	2124	244.093
	3858			cytosine	LC/MS pos early	573	C00380	HMDB00630	597		0.93	0.82	0.88		0.6497	0.3401	0.1274	0.2776	0.1473	0.0962		1.1083	1.0361	0.9075		100	100	100		Nucleotide	Pyrimidine Metabolism, Cytidine containing	881	71-30-7	2060	112.051
	3865			2'-deoxycytidine 5'-monophosphate	LC/MS pos early	533	C00239	HMDB01202	13945		1.29	0.97	0.75		0.1937	0.1368	0.9035	0.7388	0.1409	0.0923		0.9473	1.2246	0.9143		88	88	100		Nucleotide	Pyrimidine Metabolism, Cytidine containing	298	1032-65-1	975	308.064
	3867			2'-deoxycytidine	LC/MS pos early	15949	C00881	HMDB00014	13711		3.24	0.94	0.29		0.0063	0.0106	0.7784	0.7032	0.0052	0.0081		0.914	2.964	0.858		100	100	100		Nucleotide	Pyrimidine Metabolism, Cytidine containing	100000125	951-77-9	2193	228.098
	3878		Pyrimidine Metabolism, Thymine containing	thymidine	LC/MS neg	2183	C00214	HMDB00273	5789		1.02	0.91	0.89		0.9459	0.4458	0.8341	0.7134	0.7778	0.3573		1.0839	1.1099	0.9875		100	88	100		Nucleotide	Pyrimidine Metabolism, Thymine containing	872	50-89-5	1963.7	241.083
	3884			3-aminoisobutyrate	LC/MS pos early	1566	C05145	HMDB03911	64956		0.72	1.38	1.91		0.1667	0.1225	0.5032	0.5692	0.0949	0.0679		1.0263	0.7394	1.4138		88	63	75		Nucleotide	Pyrimidine Metabolism, Thymine containing	1114	10569-72-9;214139-20-5	2190	104.071
	3885		Purine and Pyrimidine Metabolism	methylphosphate	LC/MS pos early	37070		HMDB61711	13130		0.3	0.83	2.76		0.0003	0.0011	0.3281	0.4774	0.0014	0.0035		1.4863	0.4447	1.2266		100	100	100		Nucleotide	Purine and Pyrimidine Metabolism	100001805	7023-27-0	544	113
	3901	Cofactors and Vitamins	Nicotinate and Nicotinamide Metabolism	quinolinate	LC/MS pos early	1899	C03722	HMDB00232	1066		1.94	1.83	0.94		0.0057	0.0102	0.1568	0.3135	0.4738	0.2479		0.5692	1.1067	1.041		63	100	63		Cofactors and Vitamins	Nicotinate and Nicotinamide Metabolism	182	89-00-9	845	168.029
	3904			nicotinic acid mononucleotide (NaMN)	LC/MS pos early	32461	C01185	HMDB01132	5288991		0.43	1.2	2.76		0.0104	0.0146	0.5691	0.6098	0.0043	0.0073		0.9989	0.433	1.1945		88	0	88		Cofactors and Vitamins	Nicotinate and Nicotinamide Metabolism	100001058	321-02-8	648	336.048
	3905			nicotinamide	LC/MS pos early	594	C00153	HMDB01406	936		0.61	0.92	1.52		1.7878e-06	4.1942e-05	0.1565	0.3135	9.6975e-06	0.0001		1.1422	0.6954	1.0538		100	100	100		Cofactors and Vitamins	Nicotinate and Nicotinamide Metabolism	432	98-92-0	1942	123.055
	3907			nicotinamide ribonucleotide (NMN)	LC/MS pos early	22152	C00455	HMDB00229	14180		0.41	2.15	5.25		0.0133	0.0177	0.0007	0.0204	0.0014	0.0035		0.9362	0.3826	2.0097		100	100	100		Cofactors and Vitamins	Nicotinate and Nicotinamide Metabolism	1312	1094-61-7	766	335.064
	3908			nicotinamide riboside	LC/MS pos early	33013	C03150	HMDB00855	439924		0.38	1.05	2.74		0.0007	0.0022	0.6996	0.6697	0.0003	0.0013		1.2783	0.4882	1.3366		100	100	100		Cofactors and Vitamins	Nicotinate and Nicotinamide Metabolism	100001310	1341-23-7	2040	255.098
	3909			nicotinamide adenine dinucleotide (NAD+)	LC/MS neg	5278	C00003	HMDB00902	5893		0.64	1.62	2.55		0.0696	0.0616	0.0531	0.1708	0.0007	0.0024		1.1361	0.7216	1.8377		100	100	100		Cofactors and Vitamins	Nicotinate and Nicotinamide Metabolism	1310	53-84-9	1434	662.102
	3916			nicotinamide N-oxide	LC/MS pos early	39582		HMDB02730	72661		0.87	0.96	1.09		0.2156	0.1469	0.6052	0.6161	0.5668	0.2847		1.0319	0.9021	0.9873		100	100	100		Cofactors and Vitamins	Nicotinate and Nicotinamide Metabolism	100002763	1986-81-8	877	139.05
	3917			1-methylnicotinamide	LC/MS pos early	27665	C02918	HMDB00699	10129985		1.03	1.1	1.07		0.7245	0.3677	0.5008	0.5692	0.6687	0.3201		0.9395	0.9658	1.0303		100	100	100		Cofactors and Vitamins	Nicotinate and Nicotinamide Metabolism	55	1005-24-9	1940	137.071
	3922			trigonelline (N'-methylnicotinate)	LC/MS pos early	32401	C01004	HMDB00875	5570		0.11	0.8	7		4.0548e-05	0.0003	0.38	0.4979	0.0001	0.0006		1.7703	0.202	1.4142		100	100	100		Cofactors and Vitamins	Nicotinate and Nicotinamide Metabolism	100001092	535-83-1	1388	138.055
	3924			N1-Methyl-2-pyridone-5-carboxamide	LC/MS pos early	40469	C05842	HMDB04193	69698		0.93	1.04	1.13		0.4915	0.2784	0.9961	0.7558	0.545	0.2757		1.1575	1.072	1.2082		100	100	100		Cofactors and Vitamins	Nicotinate and Nicotinamide Metabolism	100001468	701-44-0	1250	153.066
	3925			N1-Methyl-4-pyridone-3-carboxamide	LC/MS pos early	57584	C05843	HMDB04194	440810		0.73	1.08	1.48		0.0679	0.0606	0.6042	0.6161	0.0392	0.0343		1.1129	0.812	1.1997		100	100	100		Cofactors and Vitamins	Nicotinate and Nicotinamide Metabolism	100001469	769-49-3	1260	153.066
	3926			adenosine 5'-diphosphoribose (ADP-ribose)	LC/MS pos early	558	C00301	HMDB01178	192		0.33	0.73	2.23		0.0012	0.0031	0.3315	0.4774	0.0016	0.0036		1.5057	0.4956	1.1047		100	100	100		Cofactors and Vitamins	Nicotinate and Nicotinamide Metabolism	215	68414-18-6	553	560.079
	3930		Riboflavin Metabolism	riboflavin (Vitamin B2)	LC/MS pos early	1827	C00255	HMDB00244	493570		0.96	1.06	1.1		0.6208	0.3297	0.4275	0.5221	0.3242	0.1817		1.0019	0.9634	1.0621		100	100	100		Cofactors and Vitamins	Riboflavin Metabolism	500	83-88-5	2292	377.146
	3931			flavin adenine dinucleotide (FAD)	LC/MS neg	2134	C00016	HMDB01248	643975		1.26	1.09	0.86		0.0004	0.0016	0.1054	0.2557	0.0008	0.0025		0.893	1.1288	0.9698		100	100	100		Cofactors and Vitamins	Riboflavin Metabolism	327	146-14-5;84366-81-4	2425	784.15
	3932			flavin mononucleotide (FMN)	LC/MS neg	15797	C00061	HMDB01520	710		1.48	1.23	0.83		0.0506	0.0484	0.0776	0.2172	0.4035	0.2197		0.8734	1.2918	1.0783		100	100	100		Cofactors and Vitamins	Riboflavin Metabolism	100000251	130-40-5	2390	455.097
	3934		Pantothenate and CoA Metabolism	pantothenate	LC/MS pos early	1508	C00864	HMDB00210	6613		1.11	0.85	0.77		0.4205	0.2477	0.1688	0.3252	0.0515	0.0428		0.9843	1.0901	0.8402		100	100	100		Cofactors and Vitamins	Pantothenate and CoA Metabolism	1024	137-08-6	1667	220.118
	3936			pantetheine	LC/MS pos early	57555	C00831		439322		0.56	1	1.81		0.0086	0.013	0.9634	0.7522	0.009	0.0119		1.1252	0.625	1.1306		100	100	100		Cofactors and Vitamins	Pantothenate and CoA Metabolism	100001495	496-65-1	2056	279.137
	3937			phosphopantetheine	LC/MS neg	15504	C01134	HMDB01416	987		0.55	1.05	1.91		7.5034e-05	0.0004	0.5638	0.6075	1.4966e-05	0.0002		1.1069	0.6083	1.1607		100	100	100		Cofactors and Vitamins	Pantothenate and CoA Metabolism	100000328	NA	1597	357.089
	3938			3'-dephosphocoenzyme A	LC/MS neg	18289	C00882	HMDB01373	444485		0.26	0.94	3.69		2.9522e-05	0.0002	0.9097	0.7388	6.6138e-06	0.0001		1.2517	0.3201	1.1825		100	100	100		Cofactors and Vitamins	Pantothenate and CoA Metabolism	100000138	3633-59-8	2013	686.142
	3940			coenzyme A	LC/MS neg	46322	C00010	HMDB01423	317		0.36	1.46	4.11		0.0016	0.004	0.0524	0.1702	1.6674e-05	0.0002		1.0405	0.3701	1.5202		100	100	100		Cofactors and Vitamins	Pantothenate and CoA Metabolism	270	85-61-0;18439-24-2	1448	382.55
	3945		Ascorbate and Aldarate Metabolism	ascorbate (Vitamin C)	LC/MS pos early	32354	C00072	HMDB00044			0.38	1.33	3.54		0.0132	0.0176	0.22	0.3839	0.0061	0.0088		1.1621	0.4375	1.5494		100	88	100		Cofactors and Vitamins	Ascorbate and Aldarate Metabolism	233	134-03-2	770	177.039
	3946			ascorbic acid 2-sulfate	LC/MS polar	63590			86484		0.78	1.65	2.12		0.1084	0.0883	0.0541	0.1724	0.0106	0.0136		1.0139	0.7874	1.6695		100	100	100		Cofactors and Vitamins	Ascorbate and Aldarate Metabolism	100009329		3042	254.982
	3947			ascorbic acid 3-sulfate*	LC/MS polar	63687			11425365		0.5	1.24	2.5		0.0046	0.0086	0.118	0.2724	0.0011	0.003		1.0695	0.5311	1.3285		100	100	100		Cofactors and Vitamins	Ascorbate and Aldarate Metabolism	100020409		2025	254.981
	3949			threonate	LC/MS polar	27738	C01620	HMDB00943	151152		0.38	1.03	2.74		1.1314e-05	0.0001	0.9169	0.7396	1.3877e-05	0.0002		1.2026	0.453	1.2413		100	100	100		Cofactors and Vitamins	Ascorbate and Aldarate Metabolism	100001022	70753-61-6	2384	135.03
	3952			oxalate (ethanedioate)	LC/MS neg	20694	C00209	HMDB02329	971		1.49	1.04	0.7		0.0026	0.0053	0.6646	0.6491	0.0005	0.0019		0.8737	1.3045	0.9067		100	100	100		Cofactors and Vitamins	Ascorbate and Aldarate Metabolism	100000841	144-62-7	603	88.988
	3953			gulonate*	LC/MS polar	46957	C00257	HMDB03290	152304		0.12	0.59	4.77		6.2925e-07	2.951e-05	0.0577	0.1795	1.1116e-06	4.7464e-05		1.7595	0.2164	1.0325		100	100	100		Cofactors and Vitamins	Ascorbate and Aldarate Metabolism	100001586	20246-53-1	2750	195.051
	3955		Tocopherol Metabolism	alpha-tocopherol	LC/MS pos late	1561	C02477	HMDB01893	14985		0.29	0.89	3.11		0.0011	0.003	0.728	0.6816	0.0017	0.0037		1.2999	0.3717	1.1545		100	100	100		Cofactors and Vitamins	Tocopherol Metabolism	1105	59-02-9;10191-41-0	2522	430.378
	3966			alpha-CEHC sulfate	LC/MS neg	47666					0.49	1.01	2.07		0.0044	0.0085	0.8956	0.7388	0.0156	0.0176		0.9186	0.4499	0.9315		88	13	88		Cofactors and Vitamins	Tocopherol Metabolism	100005972		3090	357.101
	3981		Folate Metabolism	folate	LC/MS neg	1826	C00504	HMDB00121	6037		1.52	1.09	0.72		0.0218	0.0255	0.5711	0.6102	0.0508	0.0424		0.9314	1.4173	1.0162		88	100	100		Cofactors and Vitamins	Folate Metabolism	328	59-30-3	1467	440.132
	3984		Tetrahydrobiopterin Metabolism	biopterin	LC/MS pos early	12358	C06313	HMDB00468	445040		0.79	0.66	0.84		0.1158	0.0929	0.006	0.0464	0.1979	0.1221		1.3038	1.0299	0.8635		100	100	100		Cofactors and Vitamins	Tetrahydrobiopterin Metabolism	1548	22150-76-1	1751	238.093
	3988		Pterin Metabolism	pterin	LC/MS pos early	43023	C00715	HMDB00802	73000		0.74	0.89	1.2		0.0218	0.0255	0.3599	0.4938	0.0767	0.0571		1.1376	0.8436	1.0099		100	100	100		Cofactors and Vitamins	Pterin Metabolism	100004216	22363-60-4	1805	164.057
	3999		Hemoglobin and Porphyrin Metabolism	heme	LC/MS pos late	41754	C00032	HMDB03178	26945		0.84	0.72	0.86		0.1531	0.1152	0.0136	0.0807	0.1636	0.1041		1.1737	0.9873	0.8483		100	100	100		Cofactors and Vitamins	Hemoglobin and Porphyrin Metabolism	100001386	14875-96-8	1124	616.176
	4000			bilirubin (Z,Z)	LC/MS pos late	43807	C00486	HMDB00054	5280352		0.92	0.77	0.84		0.4687	0.2694	0.1326	0.2816	0.4329	0.2311		1.2675	1.1619	0.9781		100	100	100		Cofactors and Vitamins	Hemoglobin and Porphyrin Metabolism	1090	635-65-4	1840	585.271
	4003			biliverdin	LC/MS pos late	2137	C00500	HMDB01008	5353439		2.26	0.89	0.39		0.0029	0.0057	0.1881	0.3438	0.0017	0.0037		0.5629	1.2709	0.5003		38	88	0		Cofactors and Vitamins	Hemoglobin and Porphyrin Metabolism	250	55482-27-4;55482-27-4	1016	583.255
	4012		Thiamine Metabolism	thiamin (Vitamin B1)	LC/MS pos early	5341	C00378	HMDB00235	1130		0.46	0.86	1.88		0.0005	0.0018	0.4208	0.5188	0.0048	0.0079		1.43	0.6522	1.229		100	100	100		Cofactors and Vitamins	Thiamine Metabolism	873	59-43-8	3050	265.112
	4013			thiamin monophosphate	LC/MS pos early	15798	C01081	HMDB02666	3382778		0.62	0.95	1.53		4.5942e-05	0.0003	0.3455	0.4847	0.0001	0.0006		1.085	0.6736	1.033		100	100	100		Cofactors and Vitamins	Thiamine Metabolism	523	532-40-1	2378	345.078
	4020		Vitamin A Metabolism	retinol (Vitamin A)	LC/MS pos late	1806	C00473	HMDB00305	445354		0.97	0.64	0.66		0.5646	0.3117	0.0027	0.0283	0.0424	0.0368		1.1572	1.1279	0.7414		100	100	100		Cofactors and Vitamins	Vitamin A Metabolism	498	68-26-8	1636	269.226
	4027			retinal	LC/MS pos late	40807	C00376	HMDB01358	638015		1.71	0.69	0.4		0.0018	0.0043	0.0326	0.1332	3.7634e-05	0.0003		0.8704	1.4905	0.5976		100	100	50		Cofactors and Vitamins	Vitamin A Metabolism	100004088		1666	285.221
	4036		Vitamin B6 Metabolism	pyridoxamine	LC/MS pos early	2150	C00534	HMDB01431	1052		1.46	1	0.69		0.0717	0.062	0.8857	0.7351	0.0677	0.0516		0.9948	1.4476	0.994		100	100	100		Cofactors and Vitamins	Vitamin B6 Metabolism	568	58052-48-5	2975	169.097
	4037			pyridoxamine phosphate	LC/MS pos early	3138	C00647	HMDB01555	1053		1.08	1.09	1.01		0.2946	0.1873	0.2842	0.4493	0.8917	0.3901		0.9467	1.0179	1.0277		100	100	100		Cofactors and Vitamins	Vitamin B6 Metabolism	493	529-96-4	1932	249.063
	4039			pyridoxal	LC/MS pos early	1651	C00250	HMDB01545	1050		0.9	0.91	1.01		0.3284	0.204	0.3705	0.4963	0.7436	0.3474		1.0926	0.9868	0.9995		100	100	100		Cofactors and Vitamins	Vitamin B6 Metabolism	491	65-22-5	2343	168.066
	4040			pyridoxate	LC/MS neg	31555	C00847	HMDB00017	6723		0.86	0.91	1.06		0.3883	0.2353	0.5796	0.6105	0.9347	0.3983		1.1462	0.9836	1.0436		100	100	100		Cofactors and Vitamins	Vitamin B6 Metabolism	100001121	82-82-6	2185	182.046
	4042	Xenobiotics	Benzoate Metabolism	hippurate	LC/MS neg	15753	C01586	HMDB00714	464		0.65	0.94	1.46		0.0414	0.041	0.7826	0.7039	0.0323	0.0307		1.2474	0.8046	1.1733		100	100	100		Xenobiotics	Benzoate Metabolism	100000014	495-69-2	2106.9	178.051
	4050			4-hydroxyhippurate	LC/MS neg	35527		HMDB13678	151012		0.6	1.31	2.19		0.0115	0.0157	0.1117	0.2627	0.0003	0.0012		1.2374	0.7404	1.6248		100	100	100		Xenobiotics	Benzoate Metabolism	100001423	2482-25-9	1475	194.046
	4056			benzoate	LC/MS neg	15778	C00180	HMDB01870	243		1.4	0.81	0.58		0.2035	0.1407	0.9513	0.7499	0.0989	0.0699		1.3237	1.8474	1.0685		100	100	100		Xenobiotics	Benzoate Metabolism	100000008	65-85-0	1750	121.029
	4081			4-methylcatechol sulfate	LC/MS neg	46146					1.84	1.77	0.96		0.0526	0.0496	0.0049	0.0422	0.7288	0.345		0.6284	1.157	1.1116		63	88	100		Xenobiotics	Benzoate Metabolism	100004111		2665	203.002
	4112			methyl-4-hydroxybenzoate sulfate	LC/MS neg	48429					1.12	1.11	0.99		0.95	0.4458	0.9085	0.7388	0.881	0.3886		1.0271	1.1486	1.1357		100	88	88		Xenobiotics	Benzoate Metabolism	100006116		2873	230.997
	4119			p-cresol sulfate	LC/MS neg	36103		HMDB11635	4615423		0.9	1.19	1.32		0.929	0.4438	0.7761	0.7027	0.6495	0.3137		1.1285	1.0199	1.3483		100	100	100		Xenobiotics	Benzoate Metabolism	100001315	3233-57-7	2890	187.007
	4217		Food Component/Plant	genistein	LC/MS neg	32448	C06563	HMDB03217	5280961		0.39	0.55	1.43		0.5224	0.291	0.5073	0.5711	0.1312	0.0873		4.1036	1.5848	2.2662		100	100	100		Xenobiotics	Food Component/Plant	100001221	446-72-0	3754	269.046
	4258			2,3-dihydroxyisovalerate	LC/MS polar	38276	C04039	HMDB12141	677		0.69	0.65	0.95		0.0731	0.0628	0.0415	0.1508	0.6225	0.3034		1.1924	0.8209	0.7784		75	75	25		Xenobiotics	Food Component/Plant	100002417	1756-18-9	1050	133.051
	4288			betonicine	LC/MS pos early	38100	C08269	HMDB29412	164642		0.48	0.72	1.5		0.0103	0.0146	0.2452	0.4059	0.02	0.021		1.1592	0.5594	0.8374		75	13	88		Xenobiotics	Food Component/Plant	100002153	515-25-3	1012	160.097
	4293			gluconate	LC/MS polar	587	C00257	HMDB00625	10690		0.52	0.66	1.26		0.0025	0.0052	0.0005	0.0194	0.1149	0.0791		1.279	0.6709	0.8474		100	100	100		Xenobiotics	Food Component/Plant	338	527-07-1	2922	195.051
	4316			beta-guanidinopropanoate	LC/MS pos early	35101	C03065	HMDB13222	67701		0.65	1.02	1.58		0.068	0.0606	0.7625	0.697	0.0317	0.0303		1.2531	0.8087	1.2767		100	100	100		Xenobiotics	Food Component/Plant	100001411	353-09-3	2145	132.077
	4340			cinnamoylglycine	LC/MS neg	38637		HMDB11621	709625		0.73	1.32	1.8		0.0401	0.0404	0.0343	0.1363	0.0008	0.0025		0.8897	0.6538	1.1761		88	50	100		Xenobiotics	Food Component/Plant	100002253	16534-24-0	3127	204.067
	4357			daidzein	LC/MS neg	32453	C10208	HMDB03312	5281708		0.34	1.02	2.97		0.2148	0.1468	0.2294	0.3954	0.0033	0.0059		1.9465	0.6665	1.9773		100	100	100		Xenobiotics	Food Component/Plant	100001219	486-66-8	3566	253.051
	4360			genistein sulfate*	LC/MS neg	62061					0.4	1.14	2.85		0.1161	0.0929	0.3137	0.4743	0.0028	0.0052		1.2326	0.4923	1.4038		63	25	100		Xenobiotics	Food Component/Plant	100020207		3616	349.002
	4372			equol	LC/MS neg	36774	C14131	HMDB02209	91469		0.45	0.63	1.4		0.0257	0.0286	0.195	0.3482	0.2378	0.1418		0.9037	0.4088	0.5725		88	13	50		Xenobiotics	Food Component/Plant	100001725	531-95-3;94105-90-5	4565	241.087
	4374			equol sulfate	LC/MS neg	40478					0.2	0.78	3.83		0.0006	0.0019	0.5021	0.5692	0.0011	0.0029		2.0563	0.4206	1.6088		100	100	100		Xenobiotics	Food Component/Plant	100003429		3630	321.044
	4375			ergothioneine	LC/MS pos early	37459	C05570	HMDB03045	3032311		0.58	1.04	1.81		0.0002	0.0009	0.7867	0.7039	0.0002	0.0012		1.1993	0.6897	1.2461		100	100	100		Xenobiotics	Food Component/Plant	100002154	58511-63-0	850	230.096
	4377			erythritol	LC/MS polar	20699	C00503	HMDB02994	222285		1.5	0.39	0.26		0.1792	0.1301	0.0556	0.1759	0.0009	0.0027		0.8689	1.3062	0.3388		75	88	25		Xenobiotics	Food Component/Plant	100000846	149-32-6	1491	167.056
	4411			histidine betaine (hercynine)*	LC/MS pos early	62278			3083620		1.4	1.3	0.93		0.0045	0.0085	0.045	0.1548	0.5017	0.2582		0.84	1.173	1.0936		100	100	100		Xenobiotics	Food Component/Plant	100004059	534-30-5	2094	198.124
	4414			homostachydrine*	LC/MS pos early	33009	C08283	HMDB33433	441447		0.4	0.54	1.35		0.0069	0.0112	0.0432	0.1528	0.1492	0.0969		1.8794	0.7476	1.0073		100	100	100		Xenobiotics	Food Component/Plant	100001550	1195-94-4	1750	158.118
	4437			mannonate*	LC/MS polar	62864			3246006		0.61	1.85	3.01		0.0249	0.0281	0.0015	0.0232	0.0002	0.0012		0.9376	0.5757	1.7354		100	100	100		Xenobiotics	Food Component/Plant	100003695	642-99-9	2736	195.051
	4526			stachydrine	LC/MS pos early	34384	C10172	HMDB04827	115244		0.2	0.69	3.42		0.0005	0.0018	0.2374	0.3982	0.0024	0.0046		1.8964	0.3798	1.3003		100	100	100		Xenobiotics	Food Component/Plant	100001296	4136-37-2	1440	144.102
	4551			methyl glucopyranoside (alpha + beta)	LC/MS pos early	46144					0.45	0.98	2.2		0.0015	0.0038	0.9711	0.7522	0.0015	0.0036		1.1213	0.5008	1.1037		100	100	100		Xenobiotics	Food Component/Plant	100005864		832	212.113
	4587			daidzein sulfate (1)	LC/MS neg	48727			12114465		0.55	1.35	2.46		0.121	0.0949	0.3436	0.484	0.0169	0.0188		1.2054	0.6613	1.6284		63	0	88		Xenobiotics	Food Component/Plant	100006362		2843	333.007
	4825		Drug - Antibiotic	penicillin G	LC/MS pos early	37468	C05551	HMDB15186	5904		0.88	0.7	0.8		0.7724	0.3887	0.2677	0.4339	0.3062	0.1743		1.194	1.052	0.8399		100	100	100		Xenobiotics	Drug - Antibiotic	100002155	69-57-8	2870	335.106
	5194		Chemical	sulfate*	LC/MS neg	46960	C00059	HMDB01448	1118		1.2	0.98	0.82		0.1895	0.1347	0.7902	0.7039	0.1012	0.0711		1.029	1.2322	1.0109		100	100	100		Xenobiotics	Chemical	100002528	14808-79-8	616	96.9601
	5197			O-sulfo-L-tyrosine	LC/MS neg	45413			514186		1.71	1.28	0.75		6.9204e-05	0.0004	0.0353	0.1365	0.0184	0.02		0.6815	1.1672	0.8717		38	100	75		Xenobiotics	Chemical	100005384		990	260.023
	5272			HEPES	LC/MS pos early	21248			23831		0.95	1.22	1.28		0.9479	0.4458	0.1695	0.3252	0.0651	0.0505		0.9056	0.8624	1.1012		100	100	100		Xenobiotics	Chemical	100000843	7365-45-9	1627	239.106
	5292			phenol red	LC/MS neg	36817	C12600		4766		1.04	0.54	0.52		0.6431	0.3396	0.0346	0.1363	0.0039	0.0067		1.4914	1.5579	0.8122		100	100	100		Xenobiotics	Chemical	100001724	143-74-8	3665.9	353.049
	5294			perfluorooctanesulfonate (PFOS)	LC/MS polar	57564	C18142	HMDB59586	74483		0.8	0.85	1.07		0.0056	0.01	0.0166	0.0864	0.3803	0.2087		1.1308	0.9024	0.9623		100	100	100		Xenobiotics	Chemical	100010955	1763-23-1	662	498.93
	5336			thioproline	LC/MS pos early	53231			93176		0.99	0.77	0.78		0.9292	0.4438	0.0238	0.1164	0.0006	0.0021		1.0965	1.0858	0.8432		100	100	100		Xenobiotics	Chemical	100009232	34592-47-4	1250	134.027
