# Supplementary material for: Dichloroacetate reverses sepsis-induced hepatic metabolic dysfunction
Source: eLife. 2021 Feb 22;10:e64611. doi: 10.7554/eLife.64611 (PMC7901874; doi:10.7554/eLife.64611)
Supplement: Source data 3. [file elife-64611-data3.xlsx]

## Sheet: TPM
geneSYM	geneID	mm10 coordinates	Sham-rep1	Sham-rep2	Sham-rep3	Sham-rep4	CLP-rep1	CLP-rep2	CLP-rep3	CLP-rep4	CLPDCA-rep1	CLPDCA-rep2	CLPDCA-rep3	CLPDCA-rep4
Alb	11657	chr5:90460870-90476602:+	40194.9	39609.6	45778.6	56778.2	21033.4	10827.9	22506.1	16687.5	28848.8	24195.3	12203.1	32388.3
Saa1	20208	chr7:46740497-46742980:-	21007.4	23991.7	21727.8	22581.1	42117.6	75288.5	43332.2	70101	29097.5	41575.1	66468.5	26047.6
Hpx	15458	chr7:105591611-105600116:-	20211.8	18185.1	17988.8	20692.7	44742.1	59695	32140.2	56426.4	28955.7	32759.1	60180.3	26072.3
Saa2	20209	chr7:46751833-46754314:+	20208.3	22545	22164.5	22138	46783	91044.5	46542.8	81051.8	28886.2	42210.6	79972.8	24985.4
Serpina1e	20704	chr12:103946932-103956897:-	20169.9	13263	12536.2	24240.2	19983.9	13784.7	12495.3	15751.8	13680.9	11890.7	8752.42	17828.7
Apoe	11816	chr7:19696244-19699188:-	18940.3	19757.8	20414.7	18027.4	10957.9	6381.96	12150.4	7000.19	15749.8	16023.7	6130.72	16809.2
Hp	15439	chr8:109575128-109579172:-	18479.2	20917.9	19162.8	16999.2	37872	44497.5	29252.1	44192.3	25320.9	31912.5	40302.6	22306.5
Mup3	17842	chr4:62083476-62087317:-	17502	16869	15908.1	10251.8	8599.63	5228.21	10033.9	6782.15	12582.5	12768.1	5932.17	14898.2
Trf	22041	chr9:103208876-103230286:-	16607.1	15366.6	15426.9	17177.7	22635.1	29119.7	16869.6	28479.5	17384.2	18306.7	30710.8	18139.9
Apoa1	11806	chr9:46228630-46230469:+	13749.5	12610.9	14999.7	13775.9	12796.1	7103.33	11663.1	8489.09	14008	13667	5926.54	13705
Serpina3k	20714	chr12:104338486-104345739:+	13151.2	11355	11234	13132.4	20582.8	20520.3	17369.8	19789.8	14365.6	10384.2	18495	15342.1
Ahsg	11625	chr16:22892015-22899451:+	11131.7	9524.01	10553.1	11967.8	12145.4	7848.26	9351.1	8840.17	11241.7	10414.9	7106.79	11315.2
Fgb	110135	chr3:83042246-83049863:-	10675.3	10960.5	8359.22	12838	19589.7	24497.1	15499.9	20817.6	13937.5	15943.6	28345.9	13745.4
Apoa2	11807	chr1:171221564-171226379:+	10027.1	11216.7	11970.8	8700.43	5261.85	3102.58	7101.95	3563.28	8525.13	9178.84	2651.79	8023.39
Mup20	381530	chr4:62050235-62054117:-	9870.73	8179.69	10341.4	9105.36	7391.4	3587.41	6068.98	2567.07	7568.6	7898.43	2595.92	7356.99
Cyp2e1	13106	chr7:140763832-140774977:+	9307.86	9425.63	8415.16	5898.18	6765.39	1459.11	8319.36	2320.75	7935.9	7521.67	880.602	8947.07
Orm1	18405	chr4:63344556-63348163:+	7812.14	7140.6	7143.34	6187.59	20822.1	28057.9	16977.8	26423.3	13434.8	16722.6	25332.4	10461.9
Gc	14473	chr5:89417511-89457898:-	7311.98	7628.42	7330.1	7976	6491.94	4597.07	6097.32	5626.18	7009.25	6865.44	4680.61	7407.12
Mup7	100041658	chr4:60066469-60070475:-	7268.16	3217.72	5699.6	1247.01	3987.93	2597.55	3420.86	2822	3966.51	2314.01	2920.51	5895.05
Apoc1	11812	chr7:19689480-19692659:-	7197.92	7338.31	8233.62	7332.18	3984.24	2408	4807.17	3010.01	6313.24	7080.23	2532.02	6139.33
Fgg	99571	chr3:83007724-83015056:+	7137.74	7072.11	5538.38	8038.09	12283.4	15705.2	10330.9	13815.4	8834.69	10043.4	19978.1	8975.35
Fabp1	14080	chr6:71199888-71205023:+	6747.09	9397.56	10764.9	4588.98	3304.28	1222.87	7311.17	2514.98	4014.1	5194.35	1226.31	4950.55
Selenop	20363	chr15:3270767-3280510:+	6579.38	6888.89	6479.17	6383.53	5068.78	2202.57	5374.3	2985.82	6697.28	6130.34	2298.4	7371.48
Fga	14161	chr3:83026153-83033617:+	5901.05	5799.08	4539.28	6734.81	10731.8	14767.2	8866.14	13151	7080.59	7710.05	18824.4	7174.33
Ambp	11699	chr4:63143275-63154172:-	5651.19	5339.75	5358.34	5221.62	6233.35	5520.87	6079.31	6542.55	6542.69	8019.34	5862.94	6697.6
C3	12266	chr17:57203967-57228136:-	5638.27	6237.01	5352.27	7163.86	10089	10425.9	8020.08	10525.9	7170.01	6696.34	9267.88	7377.87
Ttr	22139	chr18:20665250-20674326:+	5537.16	5534.03	6190.61	5755.84	3522.17	2281.54	4157.69	2808.88	5307.2	4933.09	2416.01	5034.62
Serpina1b	20701	chr12:103728156-103738189:-	5464.01	5075.49	5976.91	6232.56	3985.26	2661.7	3580.07	3060.15	4387.06	4222.31	2264.31	5212.62
Serpina1c	20702	chr12:103894926-103904950:-	5296.66	5212.96	6406.81	5132.94	4115.96	2780.5	4622.65	3486.18	5133.84	5107.86	2831.34	5548.05
Mgst1	56615	chr6:138140537-138156754:+	5152.54	5420.23	4943.42	4071.84	3623.4	2921.07	4521.48	2791.31	4697.37	4428.16	3491.9	4576
Ftl1	14325	chr7:45457944-45459886:-	4988.87	4969.48	5441.78	5146.19	3279.66	2408.72	3490.18	2057.35	4608.43	4626.08	2781.05	4358.12
Itih4	16427	chr14:30886476-30901986:+	4525.33	5772.16	4358.61	5215.33	7347.78	8310.67	6912.88	9000.04	5738.19	6525.2	10324.8	6380.03
Eef1a1	13627	chr9:78478454-78481724:-	4437.72	4623.69	4830.72	5040.97	3638.94	2795.63	3893.59	2922.99	4125.48	3894.55	3237.24	4513.16
Vtn	22370	chr11:78499120-78502325:+	4265.75	4384.78	4037.4	4453.94	4350.91	3687.91	4652.79	4226.06	4869.54	4972.37	4342.39	4791.29
Fgl1	234199	chr8:41191434-41215156:-	4039.17	3924.75	3277.66	3702.13	4846.21	4413.67	4590	4575.85	4228.2	4516.93	4664.62	4182.72
Hamp	84506	chr7:30942369-30944029:-	3847.87	3332.89	4053.27	5714.74	2676.11	2301.07	1877.89	2993.39	2470	3910.81	4400.35	2717.08
Rbp4	19662	chr19:38116620-38125321:-	3574.47	3570.89	3983.95	3195.68	2510.07	807.231	2681.76	1260.56	3098.04	3014.3	651.812	3266.04
Pzp	11287	chr6:128483567-128526720:-	3335.48	3573.54	2681.95	3791.89	4726.65	4972.02	3619.59	5703.84	3159.05	3049.45	4741.16	3876.96
Adh1	11522	chr3:138277645-138290691:+	3184.63	3261.15	3732.89	2829.65	1726.96	135.476	2479.17	606.369	2850.23	2462.18	239.929	2642.17
Apoh	11818	chr11:108395297-108414396:+	3156.73	3124.42	3161.23	3589.3	2951.84	2077.5	3163.44	2732.28	3428.05	3067.52	1766.12	3146.33
Serpina1d	20703	chr12:103763587-103773633:-	3104.87	2703.74	3302.37	3744.95	1843.99	1094.12	1819.93	1339.42	2306.87	2096.13	972.315	2829.94
B2m	12010	chr2:122147687-122153082:+	3087.77	2699.93	2695.95	2609.81	1419.07	800.122	1763.4	1019.09	2817.72	2571.55	937.988	2757.5
Apoc3	11814	chr9:46233050-46235636:-	3066.92	2817.71	3492.88	3047.43	1637.06	1210.36	1803.37	1255.11	2174.4	2419.33	1269.94	2534.79
Aldob	230163	chr4:49535993-49549546:-	2799.48	3105.12	3039.16	3153.28	2214.72	1430.52	2410.9	1686.67	3003.78	2755.62	1968.59	3313.49
Gpx1	14775	chr9:108339080-108340344:+	2714.78	2894.16	3067.4	2098.6	1522.59	765.768	1771.89	675.459	2407.9	2584.35	814.116	2669.56
Lrg1	76905	chr17:56119678-56121946:-	2692.59	3299.26	2945.35	2385.57	4374.93	4807.78	4906.21	4951.06	4196.05	4994.33	4667.47	3778.75
Mup14	100039116	chr4:61300037-61303998:-	2672.13	1440.54	1897.78	594.167	1332.64	832.474	1075.77	827.009	1267.03	825.726	894.992	2099.89
H2-Q10	15007	chr17:35470089-35474563:+	2590.35	2432.95	2542.05	2340.32	1463.98	1144.41	1571.8	1130.92	1889.59	1902.75	1206.12	1969.51
Rnase4	58809	chr14:51091077-51106151:+	2558.98	2302.54	2080.72	2585.18	2108.25	1020.12	2262.92	1226.76	2720.81	2499.44	738.975	2472.23
Kng1	16644	chr16:23058300-23082078:+	2391.39	2155.2	2203.35	2572.49	2265.06	1603.1	1710.25	1923.66	2203.05	2364.64	1584.89	2297.65
Wfdc21	66107	chr11:83746940-83752646:+	2376.24	2416.14	2448.86	2047.9	2580.17	2621.18	2755.92	2718.13	2604	2743.6	2314.9	2336.52
Ces1c	13884	chr8:93099016-93131283:-	2361.87	2214.02	2291.32	2643.39	795.774	282.044	992.967	378.193	1729.63	1432.4	391.412	1738.5
Plg	18815	chr17:12378609-12419384:+	2326.51	2222.02	2054.98	2345.88	2405.92	1735.13	2169.62	1998.77	2297.77	2137.77	1567.24	2466.28
Clu	12759	chr14:65968483-65981548:+	2302.63	2356.89	2093.26	2301.89	2317.8	2063.81	2232.45	2116.88	2489.24	2690.65	1874.31	2713.2
Gnmt	14711	chr17:46725664-46729165:-	2271.86	1793.21	1988.11	3523.56	1255.24	565.293	1284.65	578.231	2184.15	1472.96	317.329	2315.43
Phyh	16922	chr2:4918996-4938743:+	2267.75	2205.69	2187.78	2197.09	1435.13	983.471	1614.46	1053.08	1788.52	1622.82	891.523	2094.01
Mat1a	11720	chr14:41105033-41124428:+	2256.03	2380.48	1781.09	2951.5	3488.23	3282.88	3032.36	2594.9	3238.82	2782.85	2497.07	2989.42
Azgp1	12007	chr5:137981521-137990232:+	2252.77	2185.9	2178.6	2233.33	1781.56	1191.04	1772.9	1499.89	1958.24	2137.02	986.249	2040.87
Hpd	15445	chr5:123171807-123182723:-	2239.86	2062	2016.18	2363.19	1273.69	257.98	1432.11	528.775	2080.14	1762.21	72.3073	2148.33
Sod1	20655	chr16:90220742-90226324:+	2214.08	2426.26	2499.24	2065.87	1162.26	891.028	1611.32	888.954	1814.4	1925	965.634	1763.35
Serpina1a	20700	chr12:103853295-103863619:-	2090.86	1928.44	2258.62	2391.4	1863.18	1315.41	1709.7	1450.38	1934.37	1982.65	1084.18	2017.44
Gstp1	14870	chr19:4035411-4037912:-	2085.97	1301.45	1669.16	1896.57	1383.81	1136.67	1401.62	1119.61	1622.86	1064.05	747.221	1553.82
Itih3	16426	chr14:30908574-30923587:-	2025.58	1950.44	1747.21	2242.79	3519.12	3302.73	2568.15	3776.29	2735.51	2677.31	3144.79	2713.48
Ces3a	382053	chr8:105048599-105058414:+	2024.74	1706.06	1694.93	1329.56	1061.48	251.64	1155.33	443.674	1537.57	1197.9	190.292	1765.23
Scp2	20280	chr4:108043830-108118547:-	2016	2273.33	1923.17	1977.55	1370.39	958.577	1508.1	1037.42	1611.65	1414.72	870.392	2093.87
F2	14061	chr2:91625320-91636457:-	1923.69	1974.96	1831.71	2072.81	1637.06	1191.83	1617.4	1464.51	1744.35	1730.91	1164.19	1970.8
Cat	12359	chr2:103453904-103485153:-	1895.72	1830.34	1836.31	1686.23	1105.47	278.678	1252.26	494.365	1418.93	1141.29	222.9	1692.8
Tpt1	22070	chr14:75845256-75848303:+	1875.42	1902.89	2054	1842.63	1720.88	1452.35	1831.44	1494.86	1991.22	2109.52	1714.35	1702.14
Pck1	18534	chr2:173153073-173159253:+	1847.18	1946.09	1986.68	2224.7	1368.38	908.894	1978.62	1202.97	2756.36	2679	1326.41	3056.17
Arg1	11846	chr10:24915207-24927470:-	1845.46	1503.72	1416.78	2008.99	2017.2	2447.38	1901.53	2045.9	2231.15	1643.69	1988.72	1867.38
Cyp3a11	13112	chr5:145854607-145879854:-	1779.92	1507.38	2760.75	2398.72	473.345	15.1811	428.297	17.4724	723.213	485.308	32.4589	823.364
Serpinc1	11905	chr1:160978606-161003014:+	1779.44	1642.28	1709.9	1880.16	1442.21	911.255	1287.46	1088.14	1594.15	1521.74	856.358	1682.06
Fth1	14319	chr19:9980600-9985111:+	1746.55	1888.19	2107.46	1809.63	1229.92	1512.43	1653.37	1288.07	1809.33	1679.51	1719.31	1517.76
Cyb5a	109672	chr18:84851338-84879871:+	1743.37	1687.85	1783.51	1363.18	815.223	298.456	1080.63	414.707	1422.78	1387.8	221.554	1338.08
Cyp2d9	13105	chr15:82452377-82456827:+	1732.97	1533.95	1506.54	835.334	1395.78	629.038	1590.82	701.933	1455.4	1036.87	646.222	1575.65
Tat	234724	chr8:109990436-109999804:+	1707.73	1723.03	1303.89	1736.32	779.752	1472.66	1022.04	874.377	2709.7	2233.33	1730.5	2046.04
Mt1	17748	chr8:94179089-94180327:+	1702.32	3469.47	1069.32	4179.58	4224.59	8325.1	6604.35	6276.38	3289.32	5070.6	10175.4	2449.02
Serpina3n	20716	chr12:104406708-104414329:+	1681.37	1734.94	1668.11	1783.1	4892.45	7773.26	4037.76	6638.11	3220.34	3561.45	9731.2	2991.4
Mug1	17836	chr6:121838541-121889057:+	1600.84	1398.21	1233.69	1345.62	2101.35	1104.3	1301.67	1824.41	1327.35	956.766	808.745	1606.99
P4hb	18453	chr11:120560304-120572936:-	1537.22	1626.76	1754.89	1362.22	1754.67	2078.27	1584.87	1936.82	1490.24	1458.21	2050.82	1447.87
Gsta3	14859	chr1:21240585-21265575:+	1507.82	1407.38	1481.84	1363.08	459.282	87.4368	779.829	151.056	1218.12	727.281	51.3696	969.193
Rdh7	54150	chr10:127884027-127888733:-	1492.09	1551.51	1536.82	1483.83	1338.84	767.578	1398.54	959.282	1396.34	1291.54	746.91	1421.85
Serping1	12258	chr2:84765360-84775429:-	1487.73	1544.24	1351.08	1528.71	1451.66	1264.73	1346.33	1388.62	1494.8	1620.31	1142.5	1609.94
Hrg	94175	chr16:22951072-22961659:+	1466.45	1306.33	1475.07	1469.27	1220.88	514.161	1106.03	801.117	1403.49	1353.41	432.036	1559.94
Igfbp4	16010	chr11:99041260-99052643:+	1452.21	1616.63	1502.39	1545.62	1359.16	966.453	1414.5	990.284	1654.16	1608.31	891.678	1737.37
Uox	22262	chr3:146597149-146631483:+	1443.36	1758.87	1410.79	2267.3	719.409	261.381	900.573	564.914	1199.54	1065.45	562.417	1449.92
Tdo2	56720	chr3:81958414-81975728:-	1443.22	1229.92	1228.59	1790.38	1228.69	1041.51	1475.88	1162.62	1420.25	1041.64	512.724	1540.71
Apoc4	11425	chr7:19678084-19681460:-	1438.16	1414	1631.64	1331	1182.49	716.49	1154.25	703.523	1344.26	1435.31	489.241	1214.49
Cps1	227231	chr1:67123027-67231267:+	1410.25	890.174	868.223	1706.56	863.304	359.414	602.919	411.994	1113.46	577.413	133.724	1154.41
Akr1c6	83702	chr13:4434343-4457530:+	1407.63	1294.28	1221.93	1021.74	603.274	37.1452	817.154	137.484	1001.12	760.126	18.0892	884.189
Gstm1	14862	chr3:108012250-108017973:-	1404.2	1295.5	1995.82	1765.36	335.035	107.712	611.937	108.201	1150.28	766.407	159.548	816.05
Cdo1	12583	chr18:46713193-46728502:-	1390.3	1264.75	1196.05	1132.73	1354.93	1183.84	1313.68	1100.76	1388.08	1124.86	618.517	925.985
Cyp2c29	13095	chr19:39287085-39330713:+	1387.66	977.848	1019.02	1050.31	214.894	3.82585	345.515	13.6437	761.372	475.139	12.7567	739.39
Dbi	13167	chr1:120113280-120121096:-	1386.77	1562.62	1596.45	1285.85	879.948	684.514	1208.67	805.554	1190.81	1339.51	853.106	1083.4
Pgrmc1	53328	chrX:36598193-36606079:+	1373.3	1441.09	1454.2	1271.56	717.985	390.12	922.403	423.683	1124.15	1059.2	415.3	1190.19
Prdx1	18477	chr4:116685599-116700000:+	1297.29	1324.48	1244.45	1331.89	881.163	679.479	1030.07	622.201	1201.73	1176.63	748.662	1151
Rplp1	56040	chr9:61913283-61914510:-	1283.45	1306.25	1424	1240.09	1226.64	1186.95	1391.64	1098.36	1428.52	1513.44	1253.55	1167.46
H2-K1	14972	chr17:33996012-34000347:-	1259.75	1271.24	1235.83	1098.47	855.232	690.144	968.964	690.91	1286.26	1148.6	817.731	1151.57
Stard10	56018	chr7:101321319-101346312:+	1237.42	1364.81	1416.2	1245.83	1045.88	842.627	1091.51	852.87	1236.44	1310.44	675.079	1221.47
Slc38a3	76257	chr9:107651155-107668968:-	1227.18	1175.29	1008.67	1641.3	909.372	560.172	834.812	736.915	1061.28	913.814	491.5	1246.87
Calr	12317	chr8:84842088-84846931:-	1219.72	1137.44	1225.45	1061.77	1331.19	1560.92	1030.35	1487.99	1002.21	1178.18	1521.95	954.482
Car3	12350	chr3:14863538-14872373:+	1206.48	1287.95	1191.46	735.329	16.3324	1.36804	125.133	2.09228	356.545	204.942	5.48374	545.056
Rgn	19733	chrX:20549818-20562087:+	1204.82	1135.48	996.48	876.755	385.748	52.3153	541.43	95.2231	879.631	849.681	47.0223	848.291
Ndrg2	29811	chr14:51905271-51913488:-	1188.21	1222.42	1187.73	1052.71	787.74	253.005	984.034	352.731	1042.25	914.875	169.285	1187.49
Orm2	18406	chr4:63362449-63365877:+	1185.38	1120.06	1011.31	987.1	4888.94	4588.38	2782	5524.16	1991.25	4005.27	3266.14	1695.6
Nat8f2	93673	chr6:85865422-85869137:-	1173.14	1179.47	912.356	1043.09	804.485	614.487	786.514	640.069	913.631	823.315	656.86	1068.25
Bhmt	12116	chr13:93616891-93637758:-	1162.4	965.125	942.949	832.238	1967.18	418.446	1456.87	719.902	1210.99	659.359	204.952	1230.4
Cfb	14962	chr17:34856374-34862514:-	1154.21	1163.21	995.162	1002.87	1283.82	1936.72	1227.41	1958.23	1215.35	1212.17	1828.42	1299.45
Acox1	11430	chr11:116171883-116199045:-	1124.05	1494.77	1252.09	1097.62	745.93	653.541	1113.71	628.311	947.495	1019.38	987.397	1448.61
Sord	20322	chr2:122234839-122265337:+	1118.79	1246.15	1194.12	994.54	622.985	85.0642	769.6	215.196	915.542	771.128	64.2642	1029.99
Cyp2d26	76279	chr15:82790107-82794245:-	1107.22	1322.15	1374.9	1004.3	1035.03	605.901	1258.47	888.664	1271.32	1253.89	474.932	1291.14
Fbp1	14121	chr13:62864753-62888282:-	1104.2	1288.39	1031.33	1494.02	928.534	2150.14	1081.96	1075.02	986.206	930.259	2217.7	1263.88
Rpl10	110954	chrX:74270816-74273135:+	1101.98	1105.53	1209.52	1158.02	910.091	857.389	1004.69	841.021	1150.45	1112.93	1067.54	997.46
Mettl7b	71664	chr10:128958277-128960988:-	1099.24	1159.5	1250.95	1076.92	728.138	440.45	984.488	464.757	1124.74	1026.74	473.762	1163.1
Aldh1a1	11668	chr19:20601982-20643462:+	1097.53	1379.54	1034.34	496.895	649.609	227.53	984.047	357.279	849.258	779.88	283.267	917.224
Apcs	20219	chr1:172893961-172895054:-	1071.82	928.353	782.557	1025.94	4389.58	5356.51	3154	5529.87	2588.78	2872.24	5380.53	1625.68
Sephs2	20768	chr7:127271879-127274059:-	1052.5	918.808	1036.46	912.545	724.646	360.162	780.328	492.815	899.329	761.865	279.856	987.944
C4b	12268	chr17:34728381-34743897:-	1033.47	1050.52	823.14	919.933	935.753	572.235	827.475	813.346	830.714	826.763	562.208	1007.06
Rida	15473	chr15:34484022-34495246:-	1028.36	1032.26	1182.67	1095.42	434.34	143.096	623.262	234.191	854.897	901.986	149.847	831.304
Ifitm3	66141	chr7:141009590-141010744:-	1013.05	930.981	1043.21	874.583	844.652	1065.98	882.096	959.646	1066.46	1217.23	1242.24	913.596
Serpinf2	18816	chr11:75431736-75439501:-	1007.59	1026.5	941.062	1095.99	1116.36	704.367	1061.91	815.394	1150.27	1135.68	706.504	1166.61
Lcn2	16819	chr2:32384637-32387739:-	1001.11	1139.39	1115.03	1073.19	7821.13	23031.7	7742.3	18928.2	3873.82	3770.94	18190.2	2166.39
Ttc36	192653	chr9:44799400-44802951:-	995.114	931.092	1097.54	1083.85	681.691	301.53	703.763	444.21	936.315	933.756	163.528	892.183
Mir6236	102465959	chr9:110281287-110281409:+	989.721	751.092	950.787	623.509	741.589	636.588	884.494	798.53	1245.91	949.422	567.113	810.473
Eef2	13629	chr10:81176631-81182509:+	973.997	1028.9	1065.55	1139.15	862.443	638.336	939.584	648.317	910.358	816.269	748.203	1105.77
Slc27a2	26458	chr2:126553024-126588243:+	956.147	1154.71	1025.38	834.432	849.591	297.926	1078.88	466.345	810.031	918.33	320.054	1324.76
Itm2b	16432	chr14:73362232-73385271:-	944.567	940.685	910.958	821.604	520.837	281.887	634.55	343.672	786.801	781.641	259.998	869.509
Atp5b	11947	chr10:128083307-128090388:+	940.955	967.064	929.797	1030.52	650.414	501.391	827.765	520.004	787.49	676.06	529.05	908.429
Aldh1l1	107747	chr6:90550793-90599171:+	939.912	741.688	775.058	944.525	504.757	245.534	516.367	271.201	885.193	668.805	194.264	866.217
C9	12279	chr15:6445333-6498476:+	935.948	758.611	662.087	847.752	540.237	197.019	571.632	316.678	586.481	509.937	133.211	891.196
Cyp3a25	56388	chr5:145977194-146009618:-	933.669	561.057	929.365	745.462	327.771	104.186	286.884	108.81	432.025	299.576	37.8716	402.356
Tmbim6	110213	chr15:99392947-99410049:+	932.057	1022.2	993.064	954.612	682.95	535.605	773.001	580.904	843.426	831.84	514.881	891.008
Acaa2	52538	chr18:74779212-74806207:+	929.882	1159.77	1089.2	883.624	710.701	429.734	988.194	568.895	851.369	846.837	407.438	971.089
Rps2	16898	chr17:24720063-24721927:+	928.835	942.57	1066.99	888.618	639.902	589.131	793.512	547.866	825.864	866.234	661.643	757.981
Apoa5	66113	chr9:46268608-46271921:+	927.276	1089.92	1251.75	1196.16	755.469	498.574	968.289	497.589	1078.63	1072.08	1124.68	1262.84
Rps18	20084	chr17:33951999-33955641:-	922.552	872.875	985.095	857.882	780.18	706.69	848.701	623.245	943.139	949.942	762.362	779.468
Cpb2	56373	chr14:75242287-75283553:+	921.895	856.762	917.507	858.927	1140.18	1524.95	1035.63	1391.18	950.156	1045.02	1759.34	973.936
Apob	238055	chr12:7977677-8016839:+	912.11	1004.65	792.813	923.385	1022.64	735.45	894.159	936.133	745.177	636.832	681.895	947.983
Hmgcs2	15360	chr3:98280431-98310738:+	908.117	1426.79	1257.34	726.818	1211.11	925	1493.07	1149.06	878.831	968.692	803.955	1139.39
Cyp2f2	13107	chr7:27119955-27133660:+	902.305	762.585	1019.04	839.637	243.317	43.865	242.283	66.6822	567.904	439.26	39.4123	942.431
Ndufa4	17992	chr6:11900373-11907446:-	894.438	907.484	973.175	871.623	552.189	438.327	729.148	459.999	785.485	798.593	507.689	752.823
Pah	18478	chr10:87521795-87584137:+	891.119	699.53	779.48	1037.21	307.238	42.0037	371.217	93.1579	722.371	477.683	26.0975	784.769
Ptms	69202	chr6:124913675-124917946:-	883.13	878.792	1024.62	887.083	462.129	223.057	562.137	258.356	752.87	699.933	236.102	725.634
Atp5g3	228033	chr2:73908447-73911326:-	881.224	875.271	916.749	871.994	532.484	447.622	739.221	413.378	748.497	739.624	487.372	758.18
Ldha	16828	chr7:46845804-46855627:+	877.616	1179	890.682	863.286	896.869	1010.39	1068.73	932.539	1026.48	1280.2	1278.95	1151.24
Slc27a5	26459	chr7:12988346-12998192:-	871.686	835.164	835.106	870.282	532.934	254.628	567.497	359.493	702.588	641.959	227.369	890.326
Pon1	18979	chr6:5168090-5193946:-	870.037	855.654	789.919	730.768	521.073	96.8674	574.727	230.515	726.294	620.677	58.6379	756.193
Cfh	12628	chr1:140085855-140183411:-	862.189	906.187	612.408	801.32	1167.5	834.981	808.102	1140.55	769.253	807.994	816.193	925.351
Mt2	17750	chr8:94172618-94173567:+	843.284	1820.69	563.764	1742.15	3065.83	5124.98	4369.23	3432.31	2352.66	3945.13	5707.61	1798.8
Saa4	20211	chr7:46727992-46732603:-	842.86	885.383	535.249	474.601	1085.76	728.419	1138.84	946.895	1302.44	1325.2	481.84	1232.32
Asgr1	11889	chr11:70054124-70057895:+	818.939	874.557	856.976	750.126	685.143	461.407	816.407	507.791	804.164	808.545	479.022	784.877
C4bp	12269	chr1:130635921-130661618:-	817.504	897.113	677.189	816.11	1104.03	1225.82	971.227	1241.2	868.649	858.131	1141.27	921.156
Gapdh	14433	chr6:125161852-125166467:-	816.248	855.806	923.686	775.663	561.135	647.186	781.782	480.556	755.59	643.95	864.474	723.884
Cox4i1	12857	chr8:120668225-120674209:+	805.143	846.52	888.195	806.278	548.205	483.233	712.175	469.869	697.585	744.239	495.181	666.342
Rpl41	67945	chr10:128548110-128549168:-	786.483	831.421	913.014	798.433	851.99	957.039	984.23	872.881	924.171	981.653	914.832	707.378
Apof	103161	chr10:128267997-128270151:+	783.838	755.769	687.702	690.697	797.699	539.947	727.045	619.118	867.708	833.192	600.911	862.561
Inmt	21743	chr6:55170627-55174990:-	779.541	756.579	1043.99	652.607	16.9974	0.81788	66.7248	1.79646	376.184	293.76	4.93484	394.772
Cfi	12630	chr3:129836739-129875332:+	778.09	760.056	652.363	920.102	611.972	393.638	570.122	526.798	672.293	643.169	372.367	782.394
Ang	11727	chr14:51091077-51102009:+	777.186	716.11	707.57	722.62	797.999	520.279	658.715	542.232	843.949	976.283	364.582	769.77
Apon	28194	chr10:128254131-128255901:+	765.596	789.702	680.695	697.284	834.004	676.084	895.471	774.177	965.828	1024.5	764.346	988.235
Fah	14085	chr7:84585159-84605942:-	764.689	708.795	735.611	775.418	542.686	231.036	595.711	349.906	752.025	711.816	168.31	776.976
Cyp2d10	13101	chr15:82402846-82407194:-	764.502	767.876	865.944	646.452	549.147	279.701	585.745	310.037	697.784	644.887	222.318	719.553
Ugt2b5	22238	chr5:87124947-87140340:-	752.958	796.867	719.63	690.837	435.574	179.265	522.672	232.999	554.679	456.232	199.457	600.489
Serpina10	217847	chr12:103616675-103631444:-	744.938	827.087	641.041	779.569	929.63	732.819	877.2	848.223	1032.1	1267.17	981.239	1031.71
Sult2a8	76971	chr7:14410686-14446587:-	736.255	658.301	541.702	313.313	146.976	6.71441	216.157	20.0283	390.255	352.039	9.68784	546.117
Glud1	14661	chr14:34310727-34345033:+	734.224	797.944	754.869	701.869	683.967	310.05	712.212	350.331	761.418	613.972	263.1	695.016
Haao	107766	chr17:83831354-83846790:-	733.153	692.411	705.735	682.201	429.163	203.932	462.342	287.111	604.371	578.167	156.801	617.448
Ppia	268373	chr11:6415870-6419810:+	724.69	760.611	797.126	741.453	515.661	413.798	584.841	403.864	645.017	632.999	490.997	623.796
Hsp90b1	22027	chr10:86690841-86705444:-	724.429	681.422	658.647	670.558	786.753	1103.38	553.312	963.26	566.993	607.846	1078.12	596.964
Rpl4	67891	chr9:64173387-64178562:+	721.055	702.177	785.672	736.766	598.381	560.147	672.68	542.756	718.044	697.203	638.506	650.212
Hspa8	15481	chr9:40801273-40805199:+	718.694	654.347	638.667	710.119	660.715	361.545	737.608	359.837	985.395	824.666	346.724	988.716
Cox6a1	12861	chr5:115345654-115348955:-	714.603	807.275	855.212	715.942	537.541	507.038	635.94	442.62	670.385	726.56	464.848	653.537
C8a	230558	chr4:104815680-104876398:-	714.513	782.349	618.237	722.336	534.079	339.126	535.468	435.997	636.003	625.203	300.552	744.215
Ahcy	269378	chr2:155059312-155074497:-	714.467	680.805	742.873	842.61	635.947	391.619	649.234	433.576	756.18	625.955	353.901	859.665
Rps17	20068	chr7:81342733-81345234:-	709.081	672.219	765.399	656.772	554.86	525.138	681.589	482.062	713.16	741.181	587.075	568.409
Hspa5	14828	chr2:34772090-34776529:+	707.258	578.249	688.203	613.091	951.534	1329.61	583.084	1131.15	717.281	767.385	1192.28	678.887
Slc38a4	69354	chr15:96994823-97055956:-	702.452	718.201	604.163	849.524	405.005	215.06	453.333	308.703	583.556	479.365	219.292	809.563
Itih2	16425	chr2:10094591-10130683:-	701.919	648.514	595.875	958.4	760.863	1002.13	576.022	667.491	626.724	518.222	942.288	718.833
Lcat	16816	chr8:105939551-105943402:-	695.491	769.55	723.836	736.989	825.779	918.496	830.218	950.624	786.752	799.405	879.842	789.347
Rpl28	19943	chr7:4792965-4794547:+	685.645	642.608	773.708	657.44	538.866	520.542	621.001	512.416	734.527	767.259	562.628	568.513
Gjb1	14618	chrX:101376376-101385629:+	679.289	620.493	665.852	675.921	520.259	301.522	539.532	345.033	601.568	530.392	274.118	596.027
Rpl32	19951	chr6:115805514-115808743:-	679.077	645.956	747.315	653.195	518.757	524.73	634.916	461.066	692.474	708.642	549.43	539.381
Hsp90ab1	15516	chr17:45567778-45573261:-	678.35	646.115	707.128	748.464	507.525	292.552	637.989	296.102	783.109	555.739	371.641	821.39
Agt	11606	chr8:124556587-124569707:-	673.999	692.5	667.277	766.071	666.27	464.828	704.088	582.428	855.832	762.817	525.518	758.009
Fetub	59083	chr16:22918382-22939768:+	673.882	651.496	645.582	655.17	495.186	479.745	523.369	490.426	566.157	611.066	514.972	593.125
Errfi1	74155	chr4:150853796-150868889:+	673.563	869.449	459.321	739.097	738.084	633.643	762.449	542.095	849.653	815.789	658.584	851.028
Rps8	20116	chr4:117153836-117156132:-	669.687	619.88	709.632	645.2	538.863	518.597	612.2	488.235	665.915	662.285	615.055	539.889
Rpl7a	27176	chr2:26910807-26913311:+	669.503	660.667	741.466	683.371	481.555	423.268	574.227	428.485	620.752	626.461	497.873	564.432
Aldh2	11669	chr5:121566027-121593824:-	668.759	728.612	692.85	629.129	349.063	274.181	431.41	283.567	495.171	468.334	289.509	579.084
Crp	12944	chr1:172698056-172699966:+	668.389	609.889	501.203	577.324	801.423	399.21	785.453	640.133	962.067	952.712	846.302	792.799
Selenbp2	20342	chr3:94693573-94704406:+	662.802	225.863	651.443	425.33	255.031	13.6158	129.588	38.8719	616.142	240.285	7.1222	1158.32
Rpl13a	22121	chr7:45125563-45128745:-	657.953	650.715	739.541	684.258	575.568	564.861	660.912	519.517	694.939	763.986	666.095	561.477
Rps9	76846	chr7:3704041-3706897:+	654.36	667.148	726.836	672.539	585.82	603.417	667.863	534.845	678.619	694.345	667.596	587.072
Nudt7	67528	chr8:114133574-114152312:+	653.058	442.363	531.063	403.829	139.665	54.0835	185.67	43.2757	296.684	236.334	169.744	347.734
Rpl11	67025	chr4:136049948-136053371:-	651.194	625.806	706.67	596.526	498.422	440.178	583.23	423.407	629.514	672.837	494.266	536.204
Rplp0	11837	chr5:115559467-115563729:+	649.8	631.975	685.654	593.332	619.744	644.846	695.853	594.276	707.92	686.754	719.873	604.07
Rpl7	19989	chr1:16101296-16104433:-	648.771	625.625	709.905	670.793	535.803	429.032	593.851	436.191	647.404	647.948	530.265	570.784
Reep6	70335	chr10:80330145-80336441:+	647.304	750.877	750.531	559.544	538.273	283.981	661.762	362.343	673.672	627.588	243.337	697.401
Hgd	15233	chr16:37580153-37632026:+	643.441	583.227	525.539	727.557	333.97	99.0753	374.194	152.511	550.611	441.989	80.4723	596.567
Cd302	66205	chr2:60251993-60284484:-	639.612	571.394	514.402	614.231	529.114	654.788	483.32	648.139	582.724	609.934	600.176	631.68
Scd1	20249	chr19:44394450-44407709:-	635.656	707.43	722.776	1474.98	58.5139	41.5145	260.307	116.502	277.45	219.191	277.532	335.616
Rps12	20042	chr10:23785183-23787209:-	635.529	621.12	745.708	636.598	652.194	712.721	745.632	622.843	721.75	775.349	788.057	507.207
Serpina3m	20717	chr12:104387164-104394257:+	635.182	754.398	620.659	671.175	1480.5	2207.56	1373.58	1852.1	1127.49	1005.92	2238.06	952.823
Hc	15139	chr2:34983331-35061441:-	634.321	600.04	472.183	697.562	530.951	230.341	433.856	353.223	540.538	444.073	172.202	706.128
Tmem205	235043	chr9:21921009-21927535:-	631.634	623.456	761.647	529.772	490.514	376.397	526.939	406.975	595.77	646.969	294.902	549.072
Ddt	13202	chr10:75771233-75773374:-	630.105	602.192	760.062	695.898	367.74	178.947	445.323	216.269	543.24	548.131	144.599	575.223
Rps14	20044	chr18:60774596-60778546:+	629.201	636.744	719.461	614.251	528.974	553.589	637.814	492.309	633.635	674.395	615.096	534.684
Apom	55938	chr17:35128997-35131752:-	625.754	594.446	539.631	640.045	567.315	395.039	478.045	503.498	541.863	495.222	363.407	527.208
Itih1	16424	chr14:30929180-30943289:-	624.48	584.079	551.586	624.582	593.092	500.597	495.643	566.254	564.058	523.281	426.04	608.463
Comt	12846	chr16:18406882-18426716:-	622.336	600.842	681.717	470.291	345.253	124.632	457.855	153.517	532.727	481.485	180.24	548.025
Mbl2	17195	chr19:30232957-30239682:+	621.313	591.507	556.353	688.944	239.443	50.6789	222.092	84.7481	437.047	458.457	62.2958	445.579
Cfhr2	545366	chr1:139810292-139858699:-	619.811	551.489	506.485	635.976	444.994	242.99	465.345	375.127	532.387	427.059	240.429	575.683
Serpinf1	20317	chr11:75410029-75422623:-	616.219	591.799	626.137	679.825	280.537	110.327	343.544	164.607	465.517	410.152	137.337	535.598
Atp5a1	11946	chr18:77773768-77782868:+	605.205	623.239	624.141	636.239	416.169	314.605	519.108	311.771	533.33	445.982	335.84	608.368
Slco1b2	28253	chr6:141629518-141686635:+	599.188	623.121	448.235	422.031	496.109	115.438	532.995	249.465	474.379	374.769	103.926	541.881
Rn45s	100861531	chr17:39842997-39848829:+	598.394	505.312	485.226	422.459	445.243	433.024	666.96	472.657	678.039	537.286	428.841	508.931
Rps11	27207	chr7:45122388-45124389:-	591.082	558.576	650.229	577.778	472.937	478.109	555.73	446.386	583.196	607.874	539.472	481.962
Pigr	18703	chr1:130826684-130852249:+	590.231	643.359	586.873	621.119	304.183	71.8618	314.376	161.544	482.665	449.228	63.2076	615.898
Proc	19123	chr18:32123126-32139570:-	586.148	578.79	588.566	540.876	375.504	215.9	422.264	281.618	503.772	521.582	193.95	536.006
Oat	18242	chr7:132557475-132576398:-	585.713	577.288	443.984	727.581	202.557	136.795	358.606	118.602	409.173	396.688	76.5323	615.151
Rps4x	20102	chrX:102184941-102189391:-	580.298	574.206	615.695	616.001	531.677	510.091	612.952	488.856	607.472	595.785	581.431	513.455
Cyp2c70	226105	chr19:40153361-40187286:-	577.713	285.464	492.047	438.598	330.367	75.3952	204.997	146.646	556.403	592.951	139.222	630.157
Gstz1	14874	chr12:87147165-87164723:+	576.96	594.631	580.604	541.148	438.137	261.466	499.109	324.992	547.31	519.855	168.202	558.535
Rpl8	26961	chr15:76904071-76906318:+	571.164	589.134	655.345	593.574	494.532	467.282	564.536	443.692	582.51	579.454	531.316	516.052
Ugt2b36	231396	chr5:87065927-87092555:-	570.495	542.521	518.774	510.352	261.007	62.7075	340.926	130.508	417.051	374.21	48.6652	463.832
Rps29	20090	chr12:69157722-69159186:-	568.319	560.915	673.967	566.496	603.892	611.07	633.595	600.027	717.144	715.426	613.455	499.781
Rplp2	67186	chr7:141447650-141451342:+	565.866	576.584	682.517	576.08	576.523	642.696	668.264	580.027	680.865	682.976	692.523	524.657
Hsd3b7	101502	chr7:127800609-127803802:+	565.862	553.06	512.032	432.1	466.688	257.861	495.327	280.366	488.461	402.683	179.496	449.636
Rps15	20054	chr10:80292431-80294114:+	563.679	561.411	667.827	527.627	458.904	395.251	537.755	392.862	590.544	613.134	426.046	459.509
Lamp1	16783	chr8:13159161-13175338:+	559.693	578.81	538.957	581.595	473.173	361.085	485.161	356.919	527.634	490.726	327.765	552.95
Aadac	67758	chr3:60031788-60040157:+	556.289	545.834	517.596	593.306	256.837	130.827	381.991	200.042	455.756	402.572	90.3416	515.924
Ifitm2	80876	chr7:140954839-140955961:-	554.355	592.381	583.847	610.092	850.021	1521.81	851.24	1268.18	776.715	912.146	1376.61	593.883
Rpl9	20005	chr5:65388364-65391431:-	551.531	559.89	590.963	578.061	461.531	440.849	554.332	433.463	552.026	558.973	516.006	481.253
Cox6c	12864	chr15:35931976-35938246:-	550.247	567.513	628.172	530.973	354.106	292.759	467.62	286.878	492.806	478.008	308.163	436.164
Glul	14645	chr1:153899929-153909723:+	547.786	540.881	427.59	343.285	345.093	56.3109	524.063	68.4539	612.978	587.778	75.3174	648.338
Aes	14797	chr10:81559444-81566371:+	547.573	598.749	621.56	582.07	396.056	260.551	418.017	260.776	518.31	535.729	200.446	511.354
Angptl3	30924	chr4:99030954-99038192:+	544.159	508.489	457.847	657.704	321.968	39.9105	349.916	149.796	522.164	380.799	36.614	499.139
Cox8a	12868	chr19:7215158-7217616:-	538.258	563.047	597.894	543.891	395.163	307.81	452.724	289.749	474.36	529.202	281.193	459.858
Prdx5	54683	chr19:6906819-6909645:-	538.129	510.307	559.07	450.974	372.103	340.615	446.565	308.275	470.013	442.334	335.429	465.26
Msrb1	27361	chr17:24736593-24742778:+	537.729	589.413	582.132	504.561	430.954	221.602	563.88	294.761	563.458	565.234	224.498	529.909
F12	58992	chr13:55417958-55426804:-	536.501	506.438	516.599	515.301	427.117	386.225	426.436	367.749	497.459	461.241	380.477	508.847
Rps3a1	20091	chr3:86137940-86142668:-	534.511	521.67	571.82	558.03	448.499	384.186	512.345	377.719	530.685	536.521	466.592	470.102
Mdh1	17449	chr11:21556692-21571934:-	534.048	527.732	521.99	561.05	341.253	256.961	379.213	287.177	396.969	364.879	232.161	446.956
Rps5	20103	chr7:12922311-12926686:+	532.344	550.538	628.487	557.171	483.771	480.061	543.22	430.195	557.677	570.554	538.114	446.864
Cp	12870	chr3:19957054-20009750:+	530.146	497.407	423.637	447.589	1108.74	1978.52	852.359	1912.51	538.291	598.947	1954	531.025
Serpind1	15160	chr16:17331371-17343574:+	528.505	485.414	478.62	587.6	470.213	189.72	424.749	343.873	522.668	417.445	90.3029	548.653
Mbl1	17194	chr14:41151456-41158959:+	527.728	564.056	483.421	412.008	445.053	441.008	480.128	398.293	465.674	533.172	419.391	516.751
Atp5e	67126	chr2:174461075-174464101:-	523.778	545.507	620.909	535.11	403.916	344.579	504.058	339.508	519.573	532.692	308.987	451.563
Qdpr	110391	chr5:45434032-45450229:-	523.217	481.31	521.644	598.888	261.226	147.751	313.854	188.768	390.981	333.019	105.275	386.917
Rpl12	269261	chr2:32961712-32964045:+	521.402	484.168	623.01	533.249	477.839	504.025	535.524	457.685	527.601	521.483	587.196	395.024
Cyp27a1	104086	chr1:74713535-74737897:+	516.639	433.842	477.171	388.387	292.973	125.511	262.004	141.827	387.802	345.387	104.509	386.123
Pdia3	14827	chr2:121413902-121438686:+	516.444	500.193	483.693	453.34	525.252	597.512	410.913	596.466	387.381	443.916	602.385	401.808
Rpl19	19921	chr11:98026710-98030493:+	515.729	517.479	571.876	501.098	424.097	419.471	492.514	377.956	545.303	560.122	449.893	448.471
BC024386	212965	chr7:140906064-140907967:+	515.333	474.206	493.75	484.119	419.048	183.426	381.283	307.899	435.772	353.624	93.0738	404.827
Hsd11b1	15483	chr1:193221641-193264045:-	512.952	476.489	542.61	433.758	173.775	55.5381	270.977	104.289	398.832	377.169	72.8201	427.693
Cyp2a5	13087	chr7:26835339-26843264:+	511.838	406.346	560.682	375.748	24.1869	2.84589	89.1852	4.44512	193.36	151.015	7.55108	315.537
Nnmt	18113	chr9:48591877-48605123:-	510.089	447.694	303.589	711.142	552.388	665.581	605.998	451.063	713.084	653.235	689.031	626.256
Rps25	75617	chr9:44407714-44410406:+	508.817	494.294	568.229	496.747	425.551	444.441	497.228	409.59	511.573	542.005	489.56	419.803
Etfb	110826	chr7:43444072-43457800:+	508.784	575.348	617.656	481.645	405.323	330.11	524.191	353.356	484.077	530.448	311.855	497.082
Adk	11534	chr14:21052574-21448569:+	502.029	510.558	444.433	562.354	504.663	420.31	481.523	484.482	523.249	448.422	428.484	526.045
Hint1	15254	chr11:54866438-54870496:+	499.653	510.628	552.712	515.76	358.693	304.075	424.135	303.697	485.904	491.655	350.808	446.064
Asl	109900	chr5:130011258-130024381:-	499.509	427.935	473.931	592.814	368	306.611	357.569	260.994	630.748	467.429	182.381	596.368
C8g	69379	chr2:25498650-25501719:-	499.376	488.334	546.315	361.749	303.23	210.075	363.333	227.823	395.011	396.464	169.13	389.913
Rps16	20055	chr7:28350689-28352698:+	498.702	481.809	553.176	518.301	438.277	497.593	499.497	448.128	537.623	528.7	556.977	418.295
Akr1a1	58810	chr4:116636510-116651674:-	498.576	543.874	527.932	475.555	354.221	312.477	432.745	259.411	479.599	427.883	307.818	451.088
Slc25a5	11740	chrX:36795597-36798808:+	491.974	487.649	500.33	462.104	333.45	279.058	358.974	251.607	445.43	352.548	298.239	462.811
Chchd2	14004	chr5:129881161-129887470:-	490.51	573.85	587.092	484.365	372.906	313.836	507.871	304.277	479.887	494.48	323.547	469.149
Rpl17	319195	chr18:75000477-75003381:+	488.946	457.821	537.974	482.989	393.37	367.964	469.821	361.32	496.981	500.478	424.995	399.049
Cox6b1	110323	chr7:30616974-30626151:-	488.508	504.017	536.692	479.225	312.463	269.094	439.407	254.203	451.139	457.382	277.126	420.805
Pcyt2	68671	chr11:120610062-120617945:-	485.173	511.722	532.166	499.955	354.932	215.544	373.921	245.571	437.269	388.278	208.604	399.677
Ech1	51798	chr7:28825338-28832239:+	484.379	731.617	621.348	392.276	543.222	403.151	773.352	488.304	549.032	572.737	384.055	541.784
Acaa1b	235674	chr9:119148043-119157093:-	479.296	730.948	721.668	281.608	195.314	17.4206	425.569	59.7463	202.539	282.123	26.4865	379.877
Rps23	66475	chr13:90923122-90924732:+	477.204	466.414	548.335	481.323	396.197	371.863	459.124	348.424	503.12	526.64	448.399	397.825
Lgals9	16859	chr11:78962979-78984924:-	476.997	465.935	442.223	439.893	380.637	335.432	382.862	312.563	453.042	411.846	385.455	445.572
Qsox1	104009	chr1:155778155-155812899:-	475.592	483.535	458.2	473.887	598.425	526.78	579.272	496.774	587.488	585.351	533.784	603.276
Rack1	14694	chr11:48800360-48806241:+	473.786	463.039	528.535	474.506	418.862	444.812	479.651	386.575	470.553	457.151	492.022	393.364
Chchd10	103172	chr10:75933130-75937750:+	472.828	546.545	606.078	433.226	380.974	253.271	453.223	218.669	415.782	455.556	190.728	442.926
Gcdh	270076	chr8:84886387-84893921:-	471.849	497.676	474.134	393.695	272.588	156.711	312.389	194.599	392.456	378.345	130.042	440.583
Pcbd1	13180	chr10:61089331-61094329:+	471.483	475.781	513.263	462.965	303.798	181.52	349.81	204.86	469.039	436.364	156.689	413.762
Fn1	14268	chr1:71585473-71653234:-	470.534	536.445	409.383	458.366	783.122	987.949	644.205	972.741	609.444	557.925	1060.79	633.149
1300017J02Rik	71775	chr9:103250530-103288297:-	470.184	438.137	420.427	466.294	346.873	279.203	332.891	311.787	381.228	327.538	255.886	456.289
Adh5	11532	chr3:138437200-138455499:+	470.181	478.606	467.124	446.751	320.643	150.442	352.131	202.1	413.838	379.943	158.472	443.643
Dhcr24	74754	chr4:106561038-106589113:+	469.983	648.786	430.845	630.007	883.845	475.918	641.917	587.601	602.375	491.534	310.811	666.319
Atp5k	11958	chr5:108433253-108434378:-	469.562	490.021	517.334	466.983	273.782	203.442	390.185	234.501	420.342	434.85	206.564	418.889
Crot	74114	chr5:8966048-8997146:-	466.39	596.209	476.839	421.032	407.635	311.209	572.32	332.875	372.309	384.098	398.173	475.464
Cyp2a12	13085	chr7:27029090-27036815:+	466.132	503.84	557.289	471.645	321.877	228.866	424.696	249.234	461.373	431.415	230.415	549.368
Rpl36	54217	chr17:56613395-56614246:+	463.861	444.086	556.892	469.801	399.436	366.952	447.312	334.978	491.351	498.838	385.38	383.688
Ces1d	104158	chr8:93166072-93197804:-	463.24	633.536	609.477	295.755	59.4182	0.8157	187.773	2.28502	276.698	184.603	3.43865	256.319
Hpn	15451	chr7:31098725-31115326:-	460.535	472.437	460.193	438.582	413.615	270.639	431.421	304.647	463.467	438.331	227.062	461.879
Fdps	110196	chr3:89093588-89101967:-	460.051	443.647	499.058	380.225	442.599	577.933	359.912	375.644	264.294	148.803	364.47	210.283
Tmem176a	66058	chr6:48841483-48845364:+	455.067	417.535	369.16	360.388	575.511	572.187	465.482	658.701	503.54	610.954	432.16	471.636
Atp5h	71679	chr11:115415697-115419919:-	453.698	452.484	523.386	476.549	309.502	234.317	381.548	234.792	426.195	409.678	221.405	379.66
Pemt	18618	chr11:59970614-60046489:-	451.131	422.565	473.212	441.775	314.501	254.885	317.692	249.649	392.803	397.186	230.423	358.115
Rps27a	78294	chr11:29545842-29548040:-	450.314	452.155	503.462	462.595	392.407	411.551	442.156	361.554	446.288	485.531	479.463	370.169
Cyp1a2	13077	chr9:57676937-57683655:-	449.643	250.393	336.602	209.878	28.7894	5.89634	68.2739	7.55489	186.695	124.257	12.8308	250.679
Nme2	18103	chr11:93949814-93956256:-	449.14	426.02	500.844	384.403	448.95	490.159	499.365	479.608	485.249	497.385	482.998	414.032
Rps26	27370	chr10:128624529-128626506:-	448.868	446.325	502.695	443.424	406.183	384.728	447.36	363.727	497.961	487.74	365.691	372.619
Ephx2	13850	chr14:66084372-66124522:-	447.083	544.397	491.037	352.747	361.263	131.878	541.112	211.115	375.575	352.726	128.219	511.269
Sc5d	235293	chr9:42254177-42264300:-	446.905	411.822	443.507	444.083	265.184	186.51	227.847	171.239	247.71	169.787	168.548	254.135
Rpsa	16785	chr9:120127766-120132369:+	443.309	420.276	504.519	423.218	395.468	395.941	433.068	361.726	445.876	475.003	433.537	364.112
Cbs	12411	chr17:31612623-31637205:-	440.54	411.867	374.636	619.162	319.646	226.666	319.715	249.068	420.822	361.415	246.134	379.711
Uqcrh	66576	chr4:116066965-116075070:-	438.912	446.197	485.324	462.288	310.64	274.172	393.38	261.917	405.255	417.523	280.035	382.202
Ndufb9	66218	chr15:58933810-58939489:+	438.518	462.367	502.475	455.668	307.521	265.188	396.285	251.248	395.427	383.585	266.089	383.904
Sds	231691	chr5:120476547-120483905:+	438.054	374.295	317.577	700.483	291.929	412.295	429.74	348.575	804.372	722.228	588.672	541.072
Rpl18	19899	chr7:45718071-45720835:+	436.784	436.921	500.572	431.073	346.181	345.027	422.264	293.816	451.866	466.2	397.35	398.018
Gjb2	14619	chr14:57098602-57104702:-	435.562	447.121	393.415	448.4	415.162	283.16	424.46	323.851	420.656	384.731	397.589	498.752
Urah	76974	chr7:140835138-140837971:+	434.55	430.931	465.804	408.808	285.798	207.864	345.803	200.62	409.266	400.796	211.856	390.573
Slc25a39	68066	chr11:102402976-102407517:-	434.381	493.06	491.569	459.434	384.159	395.466	412.339	340.983	452.444	474.491	394.877	444.99
Uqcr11	66594	chr10:80402997-80406821:-	430.772	467.141	510.323	417.209	293.297	235.559	362.916	229.488	400.61	450.582	229.058	360.215
Cyp2c50	107141	chr19:40089679-40113955:+	430.137	347.954	395.643	201.095	102.434	4.2567	136.444	6.68588	266.957	190.136	8.47429	320.37
Ces3b	13909	chr8:105083755-105093591:+	429.336	279.756	417.675	451.63	220.556	43.928	208.647	58.4741	285.75	192.025	31.8451	371.848
Rps10	67097	chr17:27630429-27635242:-	427.263	415.39	452.679	414.042	369.199	386.343	437.651	353.04	446.083	460.459	413.934	374.871
Tpi1	21991	chr6:124810592-124814296:-	426.568	445.592	446.493	406.298	292.067	255.902	349.8	245.735	408.58	371.114	317.353	418.466
Cth	107869	chr3:157894248-157925063:-	426.301	331.345	293.463	538.319	219.037	67.5949	201.05	103.478	349.909	261.104	40.7299	349.522
Rpl37a	19981	chr1:72711260-72713813:+	425.548	404.793	463.289	409.81	355.149	334.985	424.301	319.609	447.729	471.174	347.755	353.493
Atp5j2	57423	chr5:145183706-145191592:-	423.622	427.95	473.189	409.12	277.837	241.184	375.221	243.725	383.457	418.808	211.394	369.608
Rps24	20088	chr14:24490681-24496146:+	423.037	402.237	441.315	419.282	349.227	323.441	420.377	306.647	430.54	451.354	367.143	342.08
C8b	110382	chr4:104766317-104804548:+	418.348	375.267	376.614	415.775	272.937	169.935	241.063	207.268	328.827	295.573	143.342	411.843
Vkorc1	27973	chr7:127893063-127895617:-	412.035	423.73	486.793	372.646	309.542	203.58	323.784	250.879	346.404	402.828	164.268	330.456
Acsm1	117147	chr7:119617828-119662515:+	411.321	389.883	370.234	338.553	289.922	145.544	305.817	159.667	355.492	304.768	107.289	355.575
Rpl13	270106	chr8:123102350-123105242:+	408.005	430.053	481.452	422.024	360.778	357.225	416.087	307.172	446.927	439.25	366.029	364.985
Rps19	20085	chr7:24884714-24889802:+	402.341	378.246	429.989	361.166	300.491	266.038	350.594	279.298	409.257	408.135	340.79	311.198
Rsrp1	27981	chr4:134923625-134927370:+	401.855	367.68	319.382	379.277	261.554	128.657	280.875	179.377	348.894	285.097	148.045	368.562
Rpl24	68193	chr16:55966275-55971437:+	398.783	380.861	426.969	385.684	288.422	290.09	368.315	253.618	407.32	426.936	326.815	351.833
Dap	223453	chr15:31224385-31274338:+	398.583	397.985	370.131	401.961	351.266	423.477	365.063	349.476	467.5	499.987	452.532	435.674
Rps27l	67941	chr9:66946076-66949522:+	398.112	394.275	422.703	354.99	245.652	209.406	308.433	217.06	365.457	377.211	238.653	328.822
Slc10a1	20493	chr12:80953185-80968079:-	398.013	409.568	405.262	331.439	284.726	52.5088	295.407	111.231	391.019	299.582	41.2255	368.366
Uba52	22186	chr8:70508263-70510417:-	397.646	421.125	476.038	413.652	329.406	301.729	357.013	284.513	415.154	435.653	297.273	343.057
Dgat2	67800	chr7:99153663-99182713:-	396.325	386.238	376.703	352.762	321.274	321.239	315.945	361.617	393.539	331.167	223.628	360.236
Rps21	66481	chr2:180257379-180258444:+	394.051	408.014	435.239	414.728	367.736	353.072	426.892	358.07	440.887	469.005	348.309	357.121
Ces1f	234564	chr8:93256236-93279736:-	393.442	490.567	448.189	407.568	44.8315	0.87383	193.205	3.27001	201.128	155.965	2.70498	234.887
Cox7c	12867	chr13:86044798-86046795:-	393.242	390.403	448.446	370.383	232.734	203.582	346.377	200.863	348.534	360.646	223.306	339.28
Pdia6	71853	chr12:17266595-17284770:+	390.07	377.678	389.413	329.371	406.337	518.059	324.936	483.316	275.238	323.6	495.548	267.945
Prdx6	11758	chr1:161240112-161251210:-	389.95	426.938	414.549	360.84	264.764	162.167	328.743	205.128	376.979	336.2	181.715	400.054
Mup21	381531	chr4:62147832-62150841:-	389.339	405.831	283.615	286.899	182.027	114.699	237.303	191.757	306.311	289.739	79.3083	391.891
Rpl23	65019	chr11:97777526-97782439:-	389.088	368.596	426.075	378.185	332.79	295.639	370.345	302.708	407.169	416.997	369.377	315.515
Sardh	192166	chr2:27188393-27247303:-	389.07	393.321	375.734	393.849	220.842	73.5332	228.796	118.944	320.407	280.506	41.6738	405.523
Actb	11461	chr5:142903115-142906754:-	388.979	354.892	524.912	357.81	366.883	497.983	356.259	376.454	409.424	481.332	525.503	359.563
Gcgr	14527	chr11:120530727-120538984:+	388.642	416.265	404.704	341.384	327.833	137.244	337.796	189.66	369.457	394.026	101.224	378.041
Uqcrb	67530	chr13:66900621-66905350:-	386.962	361.154	390.543	350.21	237.487	194.757	317.222	203.792	323.763	325.959	206.489	327.567
Eif1	20918	chr11:100319949-100322099:+	385.264	420.948	468.848	390	287.051	235.99	419.217	220.013	400.563	410.672	305.271	394.769
Ndufa6	67130	chr15:82350139-82354291:-	384.945	372.62	404.854	358.258	261.798	158.498	332.395	170.773	377.738	343.79	154.664	327.347
AI182371	98870	chr2:35081861-35100685:-	384.639	365.945	347.277	391.588	311.137	107.898	315.275	184.367	356.44	298.45	85.0047	392.41
Acadvl	11370	chr11:70010183-70015428:-	383.5	469.16	445.947	337.351	339.065	252.129	425.138	282.312	342.128	351.652	312.407	364.986
Rpl38	67671	chr11:114668543-114672331:+	382.757	366.501	428.656	375.619	335.538	360.147	366.86	303.807	395.953	408.869	393.184	297.104
Ugt2b34	100727	chr5:86889770-86906937:-	382.169	368.951	354.691	321.978	212.564	48.1298	240.078	88.7448	293.51	194.227	37.6336	305.438
Sqstm1	18412	chr11:50200152-50210820:-	381.869	359.934	398.087	403.382	313.339	223.083	355.701	213.217	348.07	331.36	335.965	357.442
Bsg	12215	chr10:79704358-79711979:+	381.84	401.749	397.557	339.754	331.394	248.333	395.19	267.602	397.15	433.132	254.948	416.961
Sdc4	20971	chr2:164424247-164443188:-	379.027	342.093	384.076	361.422	353.115	292.275	379.176	250.433	473.877	459.953	243.816	421.405
Grhpr	76238	chr4:44981394-44990734:+	377.785	421.655	370.578	273.361	397.997	423.19	462.589	378.215	381.439	405.219	436.279	400.896
Ctsl	13039	chr13:64361890-64370520:-	376.444	306.538	262.783	462.714	502.473	627.796	404.058	417.978	428.751	399.796	630.069	415.186
Fau	14109	chr19:6057888-6059524:+	375.585	396.149	453.725	390.64	298.335	283.089	352.927	255.477	394.143	420.59	310.63	339.343
Otc	18416	chrX:10252305-10321024:+	375.259	328.636	335.366	389.747	149.223	25.767	175.006	64.9253	256.663	221.933	28.0732	321.417
Rpl39	67248	chrX:37082518-37085222:-	375.033	346.129	383.165	352.787	313.668	335.929	408.06	318.687	408.438	410.62	367.474	309.738
Nat8f1	66116	chr6:85910154-85915677:-	374.365	298.23	380.518	323.246	94.7404	30.9656	137.077	46.3199	238.893	199.724	33.9552	234.845
Rpl23a	268449	chr11:78180936-78183584:-	374.362	373.287	406.254	367.614	315.109	273.409	348.1	255.217	373.537	390.56	293.548	296.234
Hebp1	15199	chr6:135137519-135168215:-	371.003	367.839	364.009	328.031	269.129	106.459	302.595	175.008	344.052	351.965	71.5784	351.377
Sec14l2	67815	chr11:4097040-4118729:-	368.327	419.062	430.263	339.531	310.435	178.972	311.905	225.011	336.758	295.9	142.948	368.442
Rpl36al	66483	chr12:69182734-69184067:-	368.069	371.875	392.994	344.22	331.955	308.971	335.535	308.206	370.612	401.257	320.706	333.121
Rpl35a	57808	chr16:33056453-33060188:+	365.107	344.064	406.753	349.992	282.278	217.114	320.099	233.955	387.814	393.586	266.995	334.925
Etfa	110842	chr9:55454436-55512243:-	364.786	400.518	378.084	377.875	239.406	146.211	304.303	180.393	299.354	288.143	148.937	335.589
Hagh	14651	chr17:24850490-24864450:+	364.058	378.706	410.898	379.115	259.627	102.786	296.401	154.56	360.901	295.711	91.7131	355.254
Csad	246277	chr15:102176998-102189043:-	363.906	430.33	304.402	483.796	404.9	236.139	296.705	244.136	258.684	187.952	217.943	227.435
Rpl14	67115	chr9:120571517-120574653:+	362.358	348.358	404.985	371.124	280.391	263.013	343.815	249.624	376.046	388.949	308.276	303.631
Glyat	107146	chr19:12633308-12651737:+	359.116	382.058	403.455	343.613	255.62	173.672	292.84	181.076	314.578	309.402	190.775	376.792
Gabarap	56486	chr11:69991370-69994949:+	357.652	371.956	410.64	374.012	298.6	321.838	358.273	314.062	352.652	400.556	365.157	312.05
F10	14058	chr8:13037308-13056676:+	357.152	341.01	343.413	346.799	275.965	167.462	268.845	212.058	321.621	338.357	167.151	328.187
Col18a1	12822	chr10:77052179-77166530:-	357.042	349.375	337.873	360.98	327.166	198.493	307.513	289.777	316.086	293.372	145.204	357.913
Tst	22117	chr15:78399556-78405859:-	356.418	345.863	357.841	301.024	194.665	123.226	257.331	123.525	323.826	293.924	91.1217	292.293
Insig1	231070	chr5:28071412-28078662:+	356.338	266.637	376.132	390.544	280.18	145.742	189.736	143.201	273.038	115.646	157.027	188.666
Tmem176b	65963	chr6:48833811-48841374:-	354.863	330.435	290.72	306.671	432.39	443.833	369.227	498.885	368.822	469.017	383.754	346.942
Cox5b	12859	chr1:36691487-36693388:+	354.469	336.188	405.862	344.991	227.613	232.7	307.211	199.174	284.84	304.236	229.214	296.18
Rps13	68052	chr7:116331507-116334190:-	354.155	327.628	377.87	332.676	294.089	274.105	322.591	270.86	358.329	372.909	334.52	306.759
Atox1	11927	chr11:55446643-55461138:-	353.627	383.803	424.214	303.573	351.268	309.302	394.168	294.175	420.564	402.522	300.375	351.294
Gabarapl1	57436	chr6:129533192-129542331:+	353.288	371.699	351.632	414.491	226.749	95.3645	279.904	111.485	256.298	243.226	99.0133	291.662
Cox5a	12858	chr9:57521232-57532426:+	353.138	341.527	370.468	354.074	212.344	150.532	291.279	156.394	304.464	298.274	157.832	312.525
Cyp7b1	13123	chr3:18071950-18243338:-	351.173	200.651	259.005	164.55	183.809	297.245	167.51	125.133	208.896	114.295	157.496	405.771
C1s1	50908	chr6:124530344-124542359:-	350.207	340.394	301.87	296.131	306.548	196.793	303.659	276.368	359.807	319.746	163.903	389.525
Slc25a47	104910	chr12:108851129-108856815:+	350.11	559.91	558.553	403.626	372.429	304.227	488.298	275.15	377.613	571.885	482.163	697.784
Hal	15109	chr10:93488768-93516761:+	348.959	281.491	343.507	429.032	219.49	81.7552	220.26	160.112	361.761	259.198	54.6993	350.222
Rpl6	19988	chr5:121204501-121209241:+	348.511	337.863	386.264	344.209	281.8	284.754	322.21	243.186	343.386	354.575	311.715	301.053
Rarres2	71660	chr6:48569696-48572802:-	347.161	316.413	410.205	317.949	172.557	105.7	225.283	119.458	284.21	294.356	108.889	322.845
Rps28	54127	chr17:33823036-33824562:-	345.674	335.979	360.329	347.52	325.674	350.558	369.783	337.408	396.328	396.039	363.605	298.416
Ces2a	102022	chr8:104734003-104741634:+	345.512	306.311	463.639	368.998	111.256	54.5297	149.212	78.9135	173.34	135.653	117.86	182.78
Retsat	67442	chr6:72598628-72607488:+	345.061	644.521	482.352	273.929	380.493	175.408	567.557	244.925	358.683	355.579	215.391	368.385
Kng2	385643	chr16:22985852-23029101:-	343.983	322.712	310.993	421.212	345.281	319.454	297.03	338.333	359.41	359.642	367.307	335.225
Marc1	66112	chr1:184786767-184811300:-	343.167	383.102	363.902	379.505	259.77	171.706	282.133	211.665	317.658	298.548	133.335	381.751
2010107E04Rik	70257	chr12:111961376-111966977:-	342.564	310.347	338.509	325.294	234.179	197.329	284.354	190.958	308.71	293.351	211.315	270.674
Ephx1	13849	chr1:180989556-181017569:-	342.425	412.166	404.8	308.361	176.345	37.4482	238.707	48.5738	241.191	218.591	51.3455	275.776
Idh1	15926	chr1:65158616-65186479:-	342.237	357.198	327.697	337.493	254.715	147.742	256.577	161.622	280.928	221.96	143.256	296.239
Atp5j	11957	chr16:84827871-84835625:-	339.066	329.948	352.7	325.958	217.943	168.867	281.932	176.082	303.764	297.763	166.066	286.791
Cpn1	93721	chr19:43956308-43986520:-	337.425	374.08	365.81	370.225	325.371	282.985	368.925	315.931	338.417	369.954	289.912	347.559
Herpud1	64209	chr8:94386429-94395371:+	336.858	420.112	448.741	380.245	360.079	362.281	324.781	331.73	494.989	611.035	285.891	474.67
Atp5d	66043	chr10:80142275-80145828:+	336.727	364.955	401.329	358.521	241.019	197.943	304.437	189.35	333.8	329.006	179.398	310.575
Fads2	56473	chr19:10064164-10101503:-	335.043	349.296	350.732	359.626	156.762	90.2993	172.597	92.9362	223.646	130.193	49.6334	262.481
Usmg5	66477	chr19:47083471-47090625:-	334.56	327.557	322.095	309.822	215.519	191.384	281.213	187.431	305.312	302.467	204.045	277.948
Ttpa	50500	chr4:20008243-20030822:+	334.449	370.42	288.247	303.472	318.757	214.048	380.745	218.455	347.21	315.386	245.43	357.699
Agxt	11611	chr1:93135240-93145421:+	334.125	283.526	317.954	433.237	201.512	70.0385	204.751	105.32	276.598	272.619	35.9273	268.05
Rpl3	27367	chr15:80077781-80083406:-	333.755	350.257	396.939	372.888	343.447	370.599	345.714	318.525	327.303	324.213	387.379	276.079
Aox3	71724	chr1:58113136-58200452:+	332.369	315.358	350.73	275.787	210.257	7.43618	164.907	38.7008	196.002	114.717	4.07774	259.284
Hnf4a	15378	chr2:163506857-163572907:+	331.137	315.804	286.294	302.378	297.57	251.19	287.586	223.603	277.006	274.352	281.289	278.644
Cd1d1	12479	chr3:86995836-86999340:-	330.591	353.489	305.115	251.961	254.171	159.083	291.191	177.976	283.155	235.655	110.449	289.818
Marc2	67247	chr1:184813068-184845847:-	330.419	330.014	337.274	329.142	224.785	127.525	254.85	158.001	312.231	289.6	110.807	324.485
Selenbp1	20341	chr3:94933083-94944758:+	330.207	285.811	290.805	343.226	167.25	85.2415	178.495	100.14	271.186	199.457	85.0617	265.133
Edf1	59022	chr2:25557900-25562082:+	329.065	364.77	382.076	296.041	246.512	241.377	283.933	227.802	335.5	379.509	258.536	348.613
Cyp2c54	404195	chr19:40037940-40073813:-	328.768	253.173	266.226	137.902	65.4268	1.18043	111.704	2.95772	212.341	156.176	4.28581	220.354
Tspan31	67125	chr10:127067290-127070261:-	327.394	347.152	341.43	290.023	297.506	273.7	323.114	277.69	324.453	344.177	232.011	340.673
Psap	19156	chr10:60277628-60302600:+	326.236	366.56	322.841	318.77	305.286	269.534	359.49	254.556	330.498	313.018	230.223	349.855
Slc22a1	20517	chr17:12648875-12675838:-	324.753	386.764	336.25	227.834	159.546	82.7385	234.634	85.4837	251.748	260.547	76.6299	271.524
Ctsd	13033	chr7:142375916-142387870:-	322.674	330.618	321.412	308.133	256.994	210.957	319.356	192.772	303.743	276.813	221.785	305.094
Tfr2	50765	chr5:137569840-137588081:+	321.688	345.443	301.648	308.187	294.017	201.601	290.105	247.111	310.964	299.233	206.209	336.44
Fxyd1	56188	chr7:31051678-31055656:-	320.674	341.166	362.714	322.447	229.506	143.953	272.653	184.505	306.943	350.636	122.139	275.458
0610005C13Rik	71661	chr7:45567795-45575176:-	320.483	332.308	331.653	343.91	293.857	160.391	277.389	205.229	316.785	302.333	97.1873	299.893
Por	18984	chr5:135689145-135735326:+	319.112	315.762	343.804	384.051	273.367	197.032	296.787	130.853	362.654	288.87	151.065	388.59
Got2	14719	chr8:95864137-95888365:-	318.738	354.48	346.518	324.172	301.82	198.558	319.332	237.113	325.866	297.956	181.154	352.21
Cyp2d13	68444	chr15:82636750-82642045:-	318.664	306.452	320.18	230.636	213.622	59.6426	203.278	120.335	250.678	242.213	32.0305	311.61
Cebpa	12606	chr7:35119293-35121931:+	317.762	332.541	334.46	322.304	263.75	108.959	224.929	176.574	244.208	208.733	167.36	275.97
Hadh	15107	chr3:131233420-131272101:-	317.687	396.054	355.018	290.603	233.143	103.26	315.065	159.81	289.07	266.37	101.08	329.034
Slc25a3	18674	chr10:91116578-91123963:-	316.248	339.34	327.741	353.497	232.055	219.502	293.884	202.712	295.002	284.074	256.308	315.914
Ugt3a2	223337	chr15:9335598-9370870:+	315.875	327.134	294.361	271.535	214.592	150.783	234.788	237.921	260.664	218.363	98.652	319.48
Gpt	76282	chr15:76696726-76699675:+	315.212	265.299	309.114	298.9	210.014	49.5245	232.961	101.223	370.495	282.483	17.0389	378.586
Cyp2j5	13109	chr4:96627432-96664119:-	315.065	351.169	298.282	328.909	240.817	120.619	295.454	198.81	289.123	257.549	131.864	348.026
Pfn1	18643	chr11:70651847-70654650:-	314.51	315.345	377.581	320.264	265.123	264.792	308.244	241.673	353.037	380.373	293.061	322.14
Aldh8a1	237320	chr10:21377300-21396578:+	314.406	296.493	272.254	327.663	229.318	136.837	235.067	182.045	283.59	235.56	105.02	312.501
Ugt2b1	71773	chr5:86916639-86926503:-	313.79	219.103	225.578	248.602	54.6917	10.5203	81.7617	21.075	158.15	98.2884	12.402	212.656
Khk	16548	chr5:30921559-30931248:+	313.046	357.594	378.248	265.165	177.059	159.796	234.919	121.534	259.221	285.09	191.691	283.62
Xbp1	22433	chr11:5520641-5525993:+	312.01	250.043	296.532	333.584	334.041	293.729	302.228	260.298	260.698	284.98	322.841	289.819
Aqp9	64008	chr9:71110659-71163289:-	310.532	343.699	282.219	267.144	264.48	98.7741	289.817	139.346	293.324	279.367	89.1087	315.4
Echs1	93747	chr7:140105723-140116423:-	310.239	341.727	317.835	299.623	231.136	164.327	277.241	175.027	285.227	256.104	127.751	290.225
Cyp8b1	13124	chr9:121914356-121916305:-	309.758	275.95	151.578	179.044	255.652	26.8885	149.506	29.1811	201.912	93.122	3.17421	235.084
Cyb5r3	109754	chr15:83153501-83172208:-	308.705	289.432	317.315	290.171	174.386	84.3831	176.52	100.708	244.993	210.938	88.4241	243.502
Gulo	268756	chr14:65986787-66009210:-	307.544	266.077	242.071	238.635	181.935	64.5834	209.436	84.2335	260.059	208.727	37.2121	266.917
Rps7	20115	chr12:28630847-28635953:-	307.441	295.294	316.021	293.811	250.656	237.106	284.93	236	306.436	306.64	279.608	255.488
Hibadh	58875	chr6:52546230-52640300:-	305.952	303.007	303.531	303.378	150.636	80.6211	192.432	97.624	242.748	232.967	61.291	250.656
Atp5o	28080	chr16:91925223-91931630:-	305.467	298.281	350.422	316.602	185.346	154.622	262.105	155.176	266.272	259.01	158.422	258.425
Ctsh	13036	chr9:90054267-90076095:+	303.446	332.207	297.609	292.726	261.802	162.819	277.942	204.072	305.661	295.38	159.663	298.196
Gls2	216456	chr10:128194635-128210004:+	302.136	273.7	275.161	507.401	151.421	91.2942	163.938	114.774	279.762	225.335	67.691	306.712
Fads1	76267	chr19:10182888-10196872:+	300.655	288.823	306.612	346.332	162.703	101.643	182.767	108.181	245.777	188.75	71.294	229.336
Hspb8	80888	chr5:116408491-116422864:-	299.737	303.691	237.94	302.882	240.692	123.208	310.257	128.636	327.253	306.035	146.853	322.241
Hsd17b2	15486	chr8:117701946-117759029:+	299.499	202.354	322.579	165.505	143.179	73.5917	156.325	71.3097	228.038	196.145	77.68	230.507
Uqcr10	66152	chr11:4701968-4704344:-	297.645	329.889	360.955	310.569	213.774	169.963	274.384	159.901	275.967	289.46	182.463	260.883
Krt18	16668	chr15:102028216-102032026:+	297.24	273.855	321.95	307.603	268.786	288.559	248.833	231.521	305.389	352.303	515.433	345.194
Ftcd	14317	chr10:76575648-76590338:+	296.899	280.318	313.968	318.566	208.771	186.48	216.952	210.301	276.994	229.74	179.936	313.851
Txn1	22166	chr4:57943373-57956411:-	295.245	301.861	323.814	281.568	200.369	215.276	244.72	192.087	290.014	289.149	221.373	274.182
Tmprss6	71753	chr15:78439667-78468634:-	294.998	314.089	282.826	288.383	196.477	69.2437	223.164	105.297	264.164	235.406	51.7652	274.766
Etnk2	214253	chr1:133363572-133380319:+	293.644	302.812	268.471	300.689	247.189	99.6628	277.579	121.414	387.907	331.643	70.7384	314.671
Ppa1	67895	chr10:61648621-61674165:+	293.466	287.834	296.053	311.581	249.484	187.91	225.222	202.986	319.865	332.256	165.605	351.651
Slc9a3r1	26941	chr11:115163341-115181178:+	293.041	327.321	338.487	295.776	190.99	113.474	236.041	132.449	303.329	310.06	197.932	364.727
Abhd14b	76491	chr9:106448640-106452918:+	290.873	314.135	318.125	346.295	172.058	76.2948	224.852	112.136	259.762	227.896	56.4283	257.507
Osgin1	71839	chr8:119437162-119446256:+	290.77	164.277	394.697	274.345	220.352	77.4398	98.5967	70.4609	117.667	99.5226	88.827	167.458
Cyp3a13	13113	chr5:137892933-137921619:-	290.229	297.463	243.845	316.977	326.023	120.95	320.894	214.333	400.954	362.865	102.995	394.429
Mug2	17837	chr6:122006798-122085967:+	290.172	277.447	260.052	409.097	230.715	234.23	182.273	313.007	207.092	183.358	206.519	280.627
Tmem59	56374	chr4:107178630-107200996:+	289.922	303.529	280.835	296.606	221.547	157.828	243.345	179.952	276.991	256.941	159.786	281.295
Ssr4	20832	chrX:73787028-73790828:+	289.578	257.762	294.122	234.35	309.192	383.396	319.787	373.431	292.729	301.879	369.917	240.846
Hspa9	15526	chr18:34937415-34954351:-	289.547	313.445	277.488	345.827	204.292	155.264	221.463	141.077	252.716	224.901	222.798	296.863
Fh1	14194	chr1:175601378-175625635:-	289.502	274.704	201.323	355.244	158.356	162.305	214.585	128.625	269.374	218.243	221.941	337.678
Bst2	69550	chr8:71534262-71537437:-	289.353	255.914	253.988	234.684	120.776	46.8772	140.109	61.9347	237.344	274.271	73.6993	230.66
Rpl36a	19982	chrX:134585654-134588062:+	288.062	288.129	319.217	278.293	254.568	243.963	312.505	230.784	310.334	329.387	285.027	236.318
Psmb4	19172	chr3:94884324-94886958:-	288.013	282.866	307.482	277.568	215.944	232.537	254.335	179.597	277.276	283.589	246.831	284.375
Elovl2	54326	chr13:41182382-41220403:-	287.667	278.918	274.481	350.987	174.566	55.702	174.779	79.0066	239.484	197.963	59.3291	294.78
Pomp	66537	chr5:147860628-147875778:+	286.742	299.769	312.225	253.94	196.026	148.473	236.65	132.515	279.615	289.241	151.552	272.325
Acsl1	14081	chr8:46471037-46536051:+	285.696	370.018	442.334	293.724	265.197	119.892	331.961	169.674	206.108	156.57	68.5132	313.168
Ak3	56248	chr19:29020832-29047902:-	284.131	295.33	272.384	280.767	214.844	141.78	235.661	162.878	269.28	243.064	131.169	272.751
Mettl7a1	70152	chr15:100304817-100314348:+	283.177	250.751	296.327	277.163	160.166	56.8384	187.054	87.1157	217.197	167.229	36.555	284.373
Rpl35	66489	chr2:39001581-39005131:-	283.1	260.42	304.407	272.371	264.097	271.03	299.494	252.988	312.762	295.191	278.737	253.265
Glo1	109801	chr17:30592862-30612659:-	282.58	334.7	315.75	271.388	206.213	110.322	253.408	161.828	262.207	265.839	111.116	257.357
Cd81	12520	chr7:143052750-143067930:+	281.942	298.187	282.826	222.1	218.634	146.384	268.772	160.076	277.802	267.048	119.868	267.176
Ccs	12460	chr19:4825366-4839322:-	281.434	272.042	306.375	226.679	186.507	67.3495	214.407	96.4643	241.453	242.06	62.5462	251.46
Gchfr	320415	chr2:119167788-119172389:+	281.185	301.284	318.914	281.101	175.459	111.625	220.033	126.068	277.069	297.092	84.5869	259.314
Pipox	19193	chr11:77880615-77893872:-	280.239	277.734	237.364	259.787	168.85	58.0118	170.264	102.598	254.727	213.759	39.4444	253.232
Rpl18a	76808	chr8:70894722-70897443:-	279.75	289.083	341.136	284.176	239	216.41	280.652	200.244	299.399	318.762	234.829	238.022
Hspd1	15510	chr1:55077833-55088243:-	278.637	295.895	274.266	304.373	214.889	117.41	240.837	139.63	273.624	240.214	158.157	345.64
Cisd1	52637	chr10:71330494-71344849:-	278.03	275.535	298.014	290.494	152.923	57.7302	200.504	77.0944	200.305	175.888	49.5395	214.864
Ldhd	52815	chr8:111626271-111630322:-	277.602	273.229	240.518	286.421	310.012	435.203	289.996	382.407	241.715	223.151	330.455	253.178
Creg1	433375	chr1:165763758-165775309:+	277.062	319.44	300.054	303.97	194.962	108.85	239.792	109.419	231.651	200.701	106.187	231.656
Uqcrfs1	66694	chr13:30540312-30545316:-	277.062	281.29	277.943	285.794	187.607	141.679	248.959	154.483	239.263	231.732	150.352	260.443
Ndufa3	66091	chr7:3617373-3620161:+	276.815	287.197	309.301	276.683	205.176	188.795	252.012	176.308	259.444	280.749	173.205	226.649
Apoa4	11808	chr9:46240844-46243458:+	276.57	517.029	284.449	236.541	303.609	308.611	256.909	187.855	229.591	371.089	274.485	211.648
Ndufb11	104130	chrX:20615326-20617564:-	276.021	286.205	294.419	269.339	214.607	187.43	254.329	191.51	256.586	260.628	186.762	235.753
Eif5a	276770	chr11:69916712-69921958:-	275.817	282.169	314.119	291.778	219.677	216.639	241.492	195.728	266.323	263.842	229.265	263.616
Fkbp8	14232	chr8:70527743-70535328:+	275.433	325.622	312.784	272.085	240.115	182.594	231.605	177.532	257.573	270.468	202.481	257.145
Ppib	19035	chr9:66060169-66066629:+	275.415	246.45	278.323	252.434	338.558	355.521	272.747	349.263	258.007	245.017	333.812	234.175
Ndufb10	68342	chr17:24722067-24724388:-	275.221	283.592	312.927	268.79	165.883	117.268	220.701	119.41	246.955	239.046	102.384	260.377
Echdc2	52430	chr4:108165437-108179308:+	274.431	272.211	277.196	254.312	209.883	142.863	216.28	148.058	246.37	226.451	124.777	226.867
Mpc2	70456	chr1:165461208-165481214:+	273.677	287.422	302.329	266.46	176.184	104.096	232.37	125.85	245.341	268.524	113.139	232.193
Ctsz	64138	chr2:174427494-174439039:-	273.462	289.427	253.518	276.63	262.367	232.317	261.367	224.192	286.494	294.14	262.294	255.444
Proz	66901	chr8:13060908-13076024:+	273.096	279.719	243.081	255.534	245.737	113.951	226.029	176.265	262.961	256.504	94.8024	285.454
Kmo	98256	chr1:175632193-175660853:+	272.732	299.049	259.454	230.884	206.63	162.448	256.663	163.816	270.413	248.967	135.421	344.417
Hist1h2bc	68024	chr13:23684199-23692480:+	272.698	290.071	299.83	248.667	229.961	135.755	282.542	177.464	306.843	313.263	137.708	317.132
H2-T23	15040	chr17:36029977-36032701:-	271.664	265.771	246.608	266.346	179.847	105.989	176.367	137.527	244.696	246.514	109.097	266.04
Cyp2c23	226143	chr19:44005022-44029247:-	271.587	295.465	278.785	352.289	83.1317	10.3142	124.8	27.9761	195.786	199.613	17.6034	250.518
Serpina6	12401	chr12:103646631-103657218:-	271.421	289.63	285.938	342.078	27.456	0.38976	47.7004	1.43742	134.894	196.195	3.62641	227.522
Nrn1	68404	chr13:36725622-36734477:-	270.893	197.575	194.919	272.758	128.876	30.5634	143.995	66.849	214.931	168.649	23.6544	156.833
Park7	57320	chr4:150897133-150909921:-	270.04	280.967	293.452	246.181	192.469	169.485	261.547	156.333	272.784	261.776	147.982	243.946
Atp5f1	11950	chr3:105942678-105960248:-	269.119	277.584	286.304	275.429	169.846	126.761	221.751	134.852	232.274	222.719	140.752	247.307
Lap3	66988	chr5:45493374-45512691:+	269.091	262.201	248.215	280.319	150.779	104.233	166.365	119.018	223.268	188.735	99.377	267.581
Selenof	93684	chr3:144570427-144597676:+	268.115	268.966	269.371	235.251	272.472	265.913	279.41	263.603	273.05	263.267	262.17	257.407
Akr1c14	105387	chr13:4059591-4090422:+	268.06	294.569	292.727	296.294	154.797	27.7471	186.02	66.2564	201.385	137.483	15.4408	240.932
Myl6	17904	chr10:128490859-128493886:-	267.415	286.638	289.49	263.218	223.186	212.942	276.719	206.277	261.536	278.133	227.747	245.295
Sdha	66945	chr13:74322255-74350240:-	266.708	307.059	276.206	290.572	170.236	126.962	212.678	138.489	210.387	182.765	132.924	253.263
Plin2	11520	chr4:86656565-86670059:-	266.438	416.024	390.496	249.771	227.195	692.069	438.729	392.164	174.634	219.287	788.849	322.682
Slc25a1	13358	chr16:17925211-17928219:-	265.294	298.664	310.135	264.014	175.888	156.152	207.499	147.287	212.322	190.075	147	207.096
Serp1	28146	chr3:58521971-58525884:-	261.65	252.702	291.812	237.828	270.115	410.801	233.157	379.435	277.016	265.286	462.128	266.383
Atp5g1	11951	chr11:96072793-96075694:-	261.573	271.573	343.5	266.829	192.796	164.511	225.819	152.364	243.627	241.404	177.87	222.427
Pecr	111175	chr1:72259173-72284321:-	261.39	245.806	267.452	220.065	159.057	75.6321	181.807	105.125	227.884	199.339	56.8988	251.321
Dcaf11	28199	chr14:55560029-55570065:+	261.149	274.879	272.82	272.913	196.276	122.398	211.961	140.337	251.465	218.994	96.7459	275.614
Cers2	76893	chr3:95315190-95323599:+	261.046	242.306	265.8	226.828	178.552	142.039	182.548	143.353	237.142	198.342	145.785	234.044
Tmem256	69186	chr11:69838525-69839558:+	260.522	265.187	270.608	281.324	194.721	147.861	242.195	159.979	260.383	279.928	149.215	241.351
Id2	15902	chr12:25093799-25096092:-	260.459	228.103	218.368	241.642	178.106	98.8308	156.514	120.721	97.9224	98.6168	215.559	174.682
Bckdha	12039	chr7:25629852-25658761:-	259.244	296.543	288.264	261.415	208.127	144.836	238.531	153.983	246.78	255.907	126.274	250.931
Ninj1	18081	chr13:49187547-49196251:+	258.481	248.346	272.009	226.99	240.294	171.785	235.522	172.931	270.065	289.189	165.395	251.579
Adh4	26876	chr3:138415497-138430892:+	258.293	304.924	284.632	239.157	184.205	33.5867	230.5	70.9193	224.554	194.451	21.3136	288.527
H6pd	100198	chr4:149979474-150009023:-	256.683	275.347	248.171	263.83	338.582	320.188	302.535	291.305	231.64	223.4	350.861	288.893
Oaf	102644	chr9:43221278-43239816:-	256.681	251.092	250.372	210.848	166.844	93.8708	174.332	110.422	221.278	216.781	117.247	265.313
Pcx	18563	chr19:4510472-4621752:+	256.501	317.787	262.142	242.604	232.194	256.031	258.383	245.703	240.941	249.92	234.095	279.143
Aldh4a1	212647	chr4:139622894-139649691:+	256.409	262.742	235.11	282.057	138.812	45.2012	158.414	70.1962	206.601	173.982	31.3767	226.612
Lamp2	16784	chrX:38401357-38456460:-	256.151	265.776	218.644	256.552	215.433	147.231	236.485	172.706	243.383	216.705	148.823	259.767
Abcb11	27413	chr2:69238282-69342616:-	255.482	207.116	230.115	227.909	148.416	33.7582	140.235	60.6267	155.658	133.879	20.6803	171.985
Cfl1	12631	chr19:5490455-5494031:+	255.238	251.555	288.237	252.066	203.482	208.348	225.372	191.723	268.127	266.163	255.494	226.156
Cd164	53599	chr10:41519500-41531042:+	254.916	241.783	212.514	215.81	223.134	184.289	242.984	188.3	259.905	225.078	198.211	239.416
Igfbp2	16008	chr1:72824480-72852471:+	254.651	211.929	268.494	239.621	156.465	25.6723	119.253	40.5028	142.934	169.313	20.8169	164.236
Cyc1	66445	chr15:76343523-76345934:+	254.168	264.727	264.895	246.379	157.492	107.564	208.068	100.503	224.403	208.678	105.555	231.415
Ebp	13595	chrX:8185329-8193512:-	253.938	233.792	252.708	257.027	168.344	133.808	181.141	137.46	215.65	199.446	101.775	220.107
Rpl27a	26451	chr7:109519195-109522369:+	253.012	230.45	276.731	227.036	201.548	206.1	220.687	175.062	244.278	252.847	218.94	206.637
Acadm	11364	chr3:153922353-153944643:-	252.811	365.741	292.062	276.039	302.177	175.528	390.319	260.941	271.056	266.933	175.722	312.329
Aldh7a1	110695	chr18:56525736-56572939:-	252.077	253.174	252.477	271.256	140.958	68.8306	157.816	94.7476	193.951	165.03	43.7888	233.677
Chp1	56398	chr2:119547707-119587022:+	251.13	293.364	276.47	280.899	254.063	160.71	299.173	184.57	260.33	219.411	184.699	296.827
Cyp2c37	13096	chr19:39992424-40012243:+	251.05	234.78	337.866	157.86	47.987	3.89905	95.986	6.15728	152.66	164.151	6.61849	230.007
Psmb7	19177	chr2:38588046-38643906:-	250.099	249.945	246.897	242.294	178.495	148.299	207.54	122.645	223.592	208.318	143.656	231.54
Cst3	13010	chr2:148871722-148875512:-	249.614	283.27	270.826	220.132	225.553	173.873	261.988	168.027	267.865	287.086	175.264	224.529
Mif	17319	chr10:75859353-75860250:-	249.39	250	294.715	249.001	150.355	151.531	159.919	141.046	206.673	214.451	219.335	183.279
Sdhb	67680	chr4:140961271-140979198:+	249.072	235.043	257.078	252.04	137.892	86.1375	182	91.7219	209.881	190.098	85.7223	220.518
Cpn2	71756	chr16:30256379-30267532:-	248.298	254.361	218.292	286.51	234.096	109.03	229.651	159.38	277.733	255.723	92.5684	330.785
Nit2	52633	chr16:57156665-57167332:-	247.242	238.815	231.555	231.137	123.679	43.1574	143.352	71.7709	197.65	171.298	30.0736	191.713
Cyp2d37-ps	627860	chr15:82688750-82690058:-	246.929	219.85	240.607	159.409	119.829	33.875	142.228	77.7027	145.872	150.417	9.15918	191.503
Uqcrq	22272	chr11:53427922-53430831:-	246.809	259.662	294.694	235.51	189.057	176.162	237.407	168.134	234.518	268.762	164.8	210.402
Sult1a1	20887	chr7:126672870-126676357:-	246.701	197.838	307.452	433.89	145.792	41.4274	183.114	53.8566	394.23	283.297	32.94	317.626
Hao1	15112	chr2:134497361-134554352:-	246.276	264.779	225.525	220.824	220.794	187.077	242.077	224.259	255.727	203.304	152.423	258.004
Tecr	106529	chr8:83571698-83594491:-	246.231	243.889	269.622	244.095	164.815	118.84	199.726	130.044	239.45	208.518	95.0514	217.875
Eif4a1	13681	chr11:69666936-69672423:-	245.686	233.587	258.8	244.557	192.872	202.831	207.106	180.411	244.128	239.872	275.02	226.715
Asgr2	11890	chr11:70092644-70106186:+	245.679	248.436	262.789	224.834	149.534	78.7473	186.253	105.891	231.78	223.87	64.7998	221.257
Ghr	14600	chr15:3317755-3583352:-	245.041	251.535	224.38	212.396	122.935	59.369	158.48	80.2087	191.677	157.396	56.6562	229.972
Ndfip1	65113	chr18:38418907-38465197:+	244.723	241.538	230.754	253.583	155.644	96.7366	184.959	117.387	221.122	196.428	104.683	236.349
Rpl10a	19896	chr17:28328471-28331033:+	244.54	253.187	291.051	266.251	230.751	235.718	265.138	208.462	256.345	249.496	255.458	213.181
Rps3	27050	chr7:99477896-99483709:-	244.26	251.122	262.354	265.692	218.641	206.204	249.798	194.779	254.724	241.7	240.753	218.762
Pdia4	12304	chr6:47796141-47813512:-	243.341	221.264	238.754	207.556	344.722	438.242	211.999	422.086	215.547	235.495	343.687	210.64
Creb3l3	208677	chr10:81084333-81098872:-	242.991	295.629	308.039	226.516	263.033	312.827	307.053	278.137	265.031	285.114	281.178	342.679
Mdh2	17448	chr5:135778649-135790386:+	241.285	240.434	260.116	241.465	171.39	156.2	239.188	140.486	230.872	218.36	162.377	232.037
Hsd17b13	243168	chr5:103955442-103977388:-	240.275	284.318	288.488	350.53	214.379	153.302	235.472	202.407	291.794	316.471	146.975	296.422
Clec2d	93694	chr6:129180615-129186535:+	240.219	196.397	250.266	225.952	135.88	38.9399	189.326	68.4023	187.558	127.212	30.7001	174.679
Nipsnap1	18082	chr11:4874003-4894200:+	239.709	243.961	234.707	236.81	150.069	60.6831	177.934	87.2435	211.763	178.325	37.4802	214.652
Cyp4v3	102294	chr8:45305802-45333196:-	239.535	258.905	228.139	211.695	130.732	95.6626	161.448	133.739	177.022	157.203	79.7217	235.835
Sdhd	66925	chr9:50596340-50603849:-	239.496	263.824	236.83	246.354	193.553	116.985	210.766	125.008	223.867	192.8	102.726	221.723
Ctsb	13030	chr14:63122462-63145923:+	239.047	240.559	229.992	259.103	162.881	79.0443	195.743	96.9541	258.986	269.008	96.4604	242.701
Krt8	16691	chr15:101996711-102004342:-	238.982	280.755	266.101	239.191	173.773	171.549	176.75	143.825	221.44	264.541	263.538	272.296
Hsd17b10	15108	chrX:152001896-152004442:+	237.37	264.516	256.813	210.55	169.254	88.0928	201.404	99.5212	190.59	173.906	58.3548	202.692
Uqcrc1	22273	chr9:108936648-108949641:+	235.754	245.152	265.452	232.053	149.584	110.691	190.075	108.634	201.66	186.554	120.138	212.079
Hspe1	15528	chr1:55088148-55091317:+	235.47	231.494	241.607	227.373	153.414	96.8695	196.408	91.8181	260.306	230.923	104.945	257.281
Iigp1	60440	chr18:60373616-60392629:+	235.087	208.818	197.197	212.328	207.459	125.508	222.747	157.252	201.845	191.66	195.693	270.408
Ndufa1	54405	chrX:37187589-37191238:-	233.844	232.044	248.577	231.066	196.495	182.726	229.055	170.924	233.43	233.011	185.3	205.052
Atf5	107503	chr7:44812256-44816658:-	233.337	237.269	255.843	303.532	378.526	361.495	337.843	295.487	282.525	309.833	404.537	190.194
Mettl26	68347	chr17:25875500-25877163:+	232.789	268.983	257.28	203.911	141.715	74.9686	187.409	97.1891	233.699	223.149	66.5246	221.869
Txn2	56551	chr15:77915051-77928994:-	232.333	240.871	262.718	232.199	176.75	141.406	198.154	136.504	237.808	243.565	136.695	232.683
Cox7b	66142	chrX:106015700-106022450:+	231.839	224.851	259.189	237.392	142.484	122.522	177.472	114.985	190.832	188.218	122.267	181.221
Adipor2	68465	chr6:119353150-119417528:-	231.815	280.734	267.959	196.159	198.672	210.04	252.543	165.764	189.954	169.081	210.458	202.901
Slc25a23	66972	chr17:57043711-57059863:-	231.802	254.874	226.888	234.887	222.646	86.1287	212.781	129.775	229.242	187.251	69.0731	229.287
Hsd17b4	15488	chr18:50128201-50196270:+	230.774	289.532	246.237	208.28	230.534	125.659	264.757	163.384	214.932	203.463	127.658	294.032
Ndufa2	17991	chr18:36742332-36744587:-	230.627	256.476	284.809	225.419	201.633	193.537	235.545	183.507	251.543	267.15	191.929	203.394
Skp1a	21402	chr11:52231995-52246858:+	230.23	250.122	241.899	221.259	161.95	104.011	205.653	107.67	226.64	218.301	105.641	233.477
Cyb5b	66427	chr8:107150661-107187470:+	229.928	240.685	215.314	221.359	139.994	86.2378	146.821	95.2353	169.01	123.833	79.1177	161.961
Hacl1	56794	chr14:31607226-31640965:-	229.69	238.336	241.671	248.487	295.682	152.978	302.778	143.698	218.672	136.634	229.034	193.774
Pxmp2	19301	chr5:110274286-110286168:-	229.583	210.977	222.305	229.599	151.028	79.2352	174.472	104.871	211.729	200.146	54.0224	222.743
Qprt	67375	chr7:127107770-127122029:-	229.531	219.067	199.081	216.905	174.844	110.848	170.885	133.687	212.616	196.967	97.0024	222.422
Psma4	26441	chr9:54950859-54958030:+	228.305	217.356	221.849	223.757	171.268	129.333	191.7	125.202	219.832	213.212	153.765	205.233
Vamp8	22320	chr6:72385221-72390667:-	227.501	230.796	233.751	226.624	173.835	127.118	190.508	139.942	208.1	226.964	130.746	203.706
Cox7a2	12866	chr9:79755241-79759853:-	227.109	240.05	249.599	244.808	160.986	155.169	201.394	132.702	213.489	209.873	160.108	197.473
Sar1b	66397	chr11:51763663-51791953:+	225.798	244.942	258.601	205.376	168.334	106.84	226.004	136.186	209.227	177.329	92.0014	226.877
Baat	12012	chr4:49489418-49506558:-	225.752	216.422	208.072	205.91	196.17	140.38	162.481	134.243	223.007	155.47	155.924	201.306
Srsf5	20384	chr12:80945499-80950506:+	225.517	190.289	186.249	221.271	179.133	125.126	183.257	126.291	166.413	145.212	119.69	158.542
Psmb1	19170	chr17:15475721-15498276:-	225.382	234.912	232.571	217.589	170.065	139.247	202.359	138.497	208.568	213.642	146.103	218.289
Hnrnpa2b1	53379	chr6:51460435-51469894:-	225.02	224.188	197.508	225.007	180.797	160.424	190.407	167.527	217.278	190.818	174.04	230.125
Mir3064	100526469	chr11:106782693-106782759:-	225.02	201.545	178.493	250.01	195.74	164.424	214.448	196.071	236.379	257.64	106.143	276.838
Hmgcl	15356	chr4:135946453-135962617:+	224.754	306.75	270.211	206.101	191.054	137.031	226.337	144.466	216.266	209.985	124.271	216.614
Upp2	76654	chr2:58567334-58792971:+	224.217	178.803	179.727	292.1	18.0473	1.95113	49.7074	3.04383	175.953	106.58	2.81818	172.647
Id3	15903	chr4:136143822-136145392:+	223.524	137.096	147.878	155.663	95.4502	53.2626	79.7663	67.7802	68.7896	67.9407	132.663	67.2841
Msmo1	66234	chr8:64718145-64733578:-	223.457	256.124	244.108	203.417	327.593	328.476	284.132	240.694	224.685	107.537	211.286	193.07
Abcd3	19299	chr3:121758904-121815302:-	223.309	249.69	235.922	186.121	160.657	106.234	195.76	106.277	162.321	136.358	108.721	234.79
Acaa1a	113868	chr9:119341294-119350295:+	222.972	292.464	256.71	182.905	206.852	175.262	256.651	192.505	204.986	241.772	112.693	263.514
Ddx5	13207	chr11:106780355-106789185:-	221.981	215.925	191.054	230.739	179.32	133.084	185.088	140.705	212.397	169.075	165.194	206.139
Dmgdh	74129	chr13:93674436-93752823:+	221.898	230.134	234.423	201.69	155.854	83.0886	150.256	93.9762	155.743	127.108	74.9769	193.743
Suclg1	56451	chr6:73248505-73276907:+	221.787	243.179	241.324	214.873	143.217	96.4719	173.328	111.683	180.64	170.787	90.0994	196.438
Aldh6a1	104776	chr12:84430721-84451024:-	221.522	231.759	202.278	230.813	149.62	86.7537	172.838	118.997	178.095	156.704	62.3694	215.56
Cnbp	12785	chr6:87842615-87851106:-	221.025	219.432	236.742	214.363	166.29	103.594	205.557	120.975	211.769	182.401	109.706	189.286
Prodh2	56189	chr7:30493658-30513402:+	220.974	222.252	230.777	205.074	151.664	21.5274	158.555	66.2678	221.05	200.012	11.8867	222.824
Sdhc	66052	chr1:171129157-171150603:-	218.785	239.483	240.291	218.87	170.122	139.744	205.654	136.94	215.422	202.423	131.584	209.275
Gstt1	14871	chr10:75783813-75798584:-	218.727	221.123	328.186	197.795	85.375	35.6353	128.195	44.1739	183.143	159.411	35.6862	174.131
Uroc1	243537	chr6:90333289-90364548:+	218.437	224.627	214.447	288.273	185.355	68.9594	188.096	132.477	252.416	201.51	40.8318	265.298
Ugt2a3	72094	chr5:87324972-87337195:-	218.43	187.988	186.151	235.175	73.4282	33.627	100.807	49.1605	144.716	98.6889	28.2842	175.381
Gpd1	14555	chr15:99717593-99725007:+	217.613	296.701	261.397	185.489	228.755	104.949	258.036	154.242	214.532	190.952	93.6924	227.882
Rps6	20104	chr4:86854099-86857367:-	217.325	211.539	242.829	233.61	192.245	194.317	213.714	183.837	228.526	223.291	217.856	191.949
Cyp2c68	433247	chr19:39688836-39741101:-	216.879	167.273	191.175	237.405	106.443	12.6126	120.638	31.6282	173.037	127.132	7.07242	207.396
Ttc39c	72747	chr18:12643533-12737052:+	216.811	211.582	198.539	212.169	141.686	27.9774	129.455	39.5268	199.594	121.547	23.1549	240.632
Afm	280662	chr5:90518949-90553544:+	216.302	218.972	220.703	238.915	112.644	21.8276	126.021	68.4026	218.701	183.349	26.2046	200.296
Hgfac	54426	chr5:35041509-35048461:+	216.041	218.583	209.982	171.732	143.774	77.8138	134.014	100.407	201.715	191.333	57.9858	213.521
Ptma	19231	chr1:86526736-86530698:+	213.882	225.543	223.625	223.785	117.825	119.561	152.539	120.714	179.584	213.151	150.699	175.818
Mcfd2	193813	chr17:87254443-87265947:-	213.876	204.61	207.115	195.695	258.746	270.193	221.066	252.098	238.203	229.574	258.587	202.117
Agpat2	67512	chr2:26593057-26604417:-	213.726	234.031	241.932	183.106	241.735	237.833	216.047	201.56	257.238	247.204	228.502	238.759
Phb2	12034	chr6:124712289-124716945:+	212.997	242.456	252.232	226.087	148.097	100.844	192.932	110.607	216.294	208.592	111.167	224.728
Atp5c1	11949	chr2:10056031-10080510:-	212.56	221.407	222.641	214.006	124.698	86.4968	176.884	95.8974	183.868	175.656	84.5049	186.402
Slc25a15	18408	chr8:22375550-22398621:-	212.168	202.219	159.442	217.442	156.478	196.519	176.336	169.387	243.323	194.781	259.974	233.133
Cfhr1	50702	chr1:139547064-139560222:-	212.071	210.093	178.797	218.552	149.237	81.5194	169.543	130.001	187.115	168.933	90.8387	247.965
Hint2	68917	chr4:43654227-43656445:-	211.821	226.416	233.877	181.45	134.703	96.5049	179.034	115.631	206.913	214.954	95.6708	183.884
Ndufs2	226646	chr1:171234853-171247122:-	211.71	244.359	232.921	237.581	157.943	123.124	226.607	133.616	191.723	177.629	140.351	212.032
Tmem14c	66154	chr13:41016250-41022582:+	211.705	214.157	210.777	198.837	142.688	87.668	163.799	98.095	202.972	162.029	83.0016	184.991
Bhmt2	64918	chr13:93656097-93674302:-	211.167	206.996	214.305	183.813	223.09	158.731	207.557	173.324	222.766	174.738	98.3203	208.967
Ddrgk1	77006	chr2:130654083-130664645:-	210.986	222.386	231.875	210.66	142.482	112.597	171.984	124.138	184.641	199.802	113.116	184.618
Hsd3b5	15496	chr3:98618636-98645534:-	210.13	89.5784	144.215	98.7853	17.9383	0.17355	24.2518	1.0589	76.661	28.173	0.60098	107.647
Got1	14718	chr19:43499753-43524605:-	209.96	133.374	111.656	327.885	93.9635	198.36	153.557	131.201	231.578	123.458	316.595	160.169
Gm4788	214403	chr1:139697919-139781239:-	209.12	196.202	153.464	238.72	169.021	74.6269	146.776	149.924	173.341	132.159	76.0889	217.424
Grn	14824	chr11:102430322-102436809:+	208.269	231.107	202.856	257.701	303.696	322.501	320.621	305.028	304.979	318.158	289.377	295.091
AW112010	107350	chr19:11047612-11050566:-	207.599	222.5	220.988	163.586	108.723	92.3059	132.5	87.827	211.472	219.643	73.693	207.996
Elob	67673	chr17:23824740-23829109:-	207.597	238.533	260.69	209.372	172.96	180.487	200.424	157.57	204.049	222.866	201	181.808
Egfr	13649	chr11:16752203-16913907:+	207.124	144.805	150.61	216.386	194.445	211.859	137.135	183.074	168.106	138.719	163.88	220.721
Upb1	103149	chr10:75406911-75441679:+	206.552	223.861	216.18	218.747	163.356	73.6436	171.001	107.066	201.507	180.232	50.8687	193.502
Dpyd	99586	chr3:118562178-119432918:+	206.543	211.383	175.052	259.404	137.626	80.0642	130.119	101.416	141.137	127.069	66.3872	200.929
Sec61b	66212	chr4:47474661-47483233:+	206.404	212.873	248.12	169.775	203.274	303.78	199.5	265.359	203.424	240.268	289.079	172.858
Angptl8	624219	chr9:21835510-21837347:+	205.77	96.847	164.887	49.3615	98.4762	15.3957	44.0998	46.6626	179.79	77.0541	51.1051	45.6859
Vcp	269523	chr4:42979964-43000507:-	204.973	193.651	199.118	198.718	163.39	136.251	174.062	123.751	192.196	169.762	158.472	202.043
Fmo5	14263	chr3:97628804-97655287:+	204.035	224.382	207.401	245.293	111.544	36.6829	150.446	71.335	293.115	291.266	25.7251	317.288
S100a1	20193	chr3:90511034-90514330:-	203.676	233.572	250.439	226.617	148.454	120.062	196.679	134.914	213.931	211.56	136.907	188.212
Rpl29	19944	chr9:106429411-106431568:+	203.589	196.373	221.725	191.147	182.33	182.75	196.104	158.432	218.542	214.034	185.471	176.823
Surf4	20932	chr2:26920041-26933511:-	202.646	195.853	221.518	189.652	244.724	319.494	215.764	280.3	218.958	220.703	322.777	207.537
Sema4g	26456	chr19:44989344-45003395:+	202.568	198.332	177.9	199.829	169.322	63.8585	138.47	97.8201	183.681	139.492	37.7469	187.885
Prelid1	66494	chr13:55322055-55325272:+	202.566	218.145	219.865	181.665	158.48	125.235	185.429	119.569	200.027	194.388	152.658	197.012
Uqcrc2	67003	chr7:120635189-120659523:+	202.462	211.976	199.596	204.158	119.955	95.3243	152.298	96.3484	161.303	144.567	102.586	193.114
Copz1	56447	chr15:103272918-103299864:+	202.392	211.268	225.631	197.053	157.401	154.91	171.12	152.412	189.456	198.91	134.624	184.821
Tmsb4x	19241	chrX:167207094-167209218:-	202.07	159.411	246.79	192.981	286.606	167.338	314.409	177.683	336.065	348.869	201.344	172.667
Gamt	14431	chr10:80258151-80261012:-	201.997	201.761	204.805	201.209	102.606	7.13395	126.369	31.602	184.51	135.787	4.49156	177.19
Sdc1	20969	chr12:8771396-8793687:+	201.924	206.761	198.672	261.523	174.687	169.337	175.355	129.918	234.631	182.361	216.807	215.933
Pbld1	68371	chr10:63061617-63077536:+	201.626	242.745	195.565	203.918	179.092	81.1715	186.759	138.024	197.395	150.778	65.7915	202.634
Eci2	23986	chr13:34977748-34994144:-	200.934	279.692	266.938	188.396	224.124	224.287	341.601	236.032	219.718	225.003	247.496	247
Gpx4	625249	chr10:80047166-80056439:+	200.425	232.992	248.281	206.009	176.639	130.085	220.184	121.401	223.114	215.046	125.257	188.351
Hsd3b3	15494	chr3:98741476-98763128:-	200.086	169.558	207.751	203.973	48.5999	1.71829	75.2918	7.15699	128.535	84.0377	1.53862	158.057
Grina	66168	chr15:76246807-76249904:+	200.077	208.883	210.241	183.234	189.328	253.404	219.109	182.005	237.355	225.692	241.896	206.014
Cmbl	69574	chr15:31568912-31590119:+	199.873	221.546	201.222	135.668	154.839	76.489	224.097	94.0892	172.588	160.509	51.0675	203.157
Gpt2	108682	chr8:85492617-85527558:+	199.719	237.991	190.682	196.89	154.047	173.07	202.305	122.825	251.958	220.968	299.758	247.867
Ndufs6	407785	chr13:73319876-73328482:-	199.224	205.444	229.012	187.393	129.246	119.896	176.978	120.046	178.352	193.608	119.308	166.374
Rpl37	67281	chr15:5116613-5119140:+	199.152	187.252	216.196	187.33	147.059	146.445	177.581	129.066	210.818	210.79	156.253	163.208
Cope	59042	chr8:70302785-70312990:+	198.807	196.575	242.264	178.583	182.849	239.546	173.04	209.271	189.004	195.649	243.843	180.111
Eef1g	67160	chr19:8967041-8978180:+	198.276	194.872	212.154	195.282	183.18	191.307	209.047	182.234	199.284	201.64	204.009	179.122
Rxra	20181	chr2:27677201-27763319:+	197.877	220.327	187.86	202.028	196.735	127.649	183.86	141.686	192.846	178.896	129.881	213.584
Mlxipl	58805	chr5:135106891-135138382:+	197.722	157.953	160.952	166.757	92.1814	29.1011	93.0411	43.6114	132.554	122.81	42.5753	145.296
Cyp2c67	545288	chr19:39608859-39649042:-	197.145	210.726	152.744	176.062	96.1284	21.5385	125.12	35.19	147.849	136.94	14.5128	157.816
Mrpl12	56282	chr11:120484669-120488754:+	197.12	218.163	234.392	189.833	140.445	77.8061	166.542	90.8024	191.508	186.427	66.3337	194.778
1110008F13Rik	67388	chr2:156863122-156873562:+	197.017	230.567	210.227	216.304	187.112	153.393	205.825	136.845	194.289	185.461	156.739	213.193
C6	12274	chr15:4727210-4804045:+	196.981	188.061	140.307	180.523	175.666	95.8371	154.064	143.463	184.281	145.24	76.3938	208.448
Psmb6	19175	chr11:70525357-70527858:+	196.566	203.679	219.751	184.882	146.082	143.621	173.647	122.86	206.187	207.831	159.069	181.866
Mup1	17840	chr4:60498013-60501960:-	195.609	109.494	179.868	19.7549	141.05	98.5359	108.416	83.7542	123.676	67.5789	83.2018	213.108
H2-D1	14964	chr17:35263094-35267497:+	195.553	204.795	195.607	175.132	175.249	181.379	216.458	150.992	255.554	240.909	218.128	207.336
Pnpo	103711	chr11:96937816-96944019:-	195.511	216.29	189.26	188.312	200.32	145.407	188.419	153.182	205.689	192.799	183.313	209.97
Kyat1	70266	chr2:30185124-30205847:-	195.458	156.592	183.68	214.814	183.535	67.8346	156.964	90.5461	222.45	174.753	35.4093	202.578
Psme1	19186	chr14:55578494-55581527:+	195.002	198.715	193.143	162.485	129.43	94.5595	150.633	103.945	171.736	183.914	114.038	148.029
Sem1	20422	chr6:6558275-6578658:-	194.925	193.76	210.491	179.83	139.011	124.396	174.267	119.635	187.848	197.302	131.964	163.957
Slc17a2	218103	chr13:23807027-23823525:+	192.888	194.506	194.816	209.06	123.586	94.1769	146.325	81.6837	155.83	153.865	148.051	177.394
Pygl	110095	chr12:70190815-70227683:-	192.821	169.849	176.845	159.216	114.886	50.6928	112.344	65.2188	135.981	96.2284	46.7775	165.754
Lactb2	212442	chr1:13625900-13660509:-	192.227	174.716	169.781	173.65	95.4787	50.5473	103.85	62.0421	140.272	96.524	49.0632	172.674
Bphl	68021	chr13:34037641-34074074:+	192.014	212.045	212.046	167.12	124.936	50.4621	163.493	75.4412	177.918	165.389	39.0331	174.136
Aspg	104816	chr12:112106683-112127573:+	191.909	190.994	170.695	188.266	153.703	81.3875	151.423	101.576	163.575	175.387	108.172	165.764
Isoc2a	664994	chr7:4877053-4895716:+	191.76	195.435	193.343	148.963	120.572	73.2521	160.179	91.2973	176.928	166.659	62.2335	187.582
Ssr3	67437	chr3:65379657-65392553:-	191.325	201.124	202.637	183.519	231.835	376.704	192.781	342.783	200.954	190.508	412.115	189.252
Thrsp	21835	chr7:97412933-97417550:-	191.056	155.136	247.999	131.984	28.0598	16.83	36.9483	10.6855	156.261	129.16	24.7378	67.1518
Rpl21	19933	chr5:146832890-146837032:+	190.467	183.674	207.75	190.324	159.9	148.051	181.663	149.518	196.576	210.107	167.695	157.322
Rpl27	19942	chr11:101442245-101445596:+	190.276	175.224	213.181	177.646	147.334	151.702	166.231	125.56	178.274	187.89	170.331	157.264
Keg1	64697	chr19:12695790-12719896:+	189.587	175.381	213.498	222.544	60.5608	3.2644	77.9489	12.6245	114.815	73.3402	1.58098	131.649
Amy1	11722	chr3:113555952-113577750:-	189.328	192.304	192.765	226.414	167.138	125.442	181.475	176.329	155.714	127.48	86.6649	176.42
Eef1b2	55949	chr1:63176831-63180486:+	188.816	186.85	203.154	196.024	170.546	148.791	195.443	150.182	189.551	194.079	179.433	168.004
Lbp	16803	chr2:158306493-158332852:+	188.809	186.511	138.024	168.861	327.813	385.071	279.897	439.126	273.485	358.485	350.355	227.543
Agmat	75986	chr4:141746675-141759263:+	188.585	186.696	185.958	167.263	102.511	50.6544	106.292	59.8243	143.591	149.332	32.6738	167.656
Adi1	104923	chr12:28675207-28682174:+	188.524	215.661	203.933	186.968	144.035	76.3428	179.012	103.135	178.486	167.64	79.3844	209.978
C1ra	50909	chr6:124512621-124523440:+	187.924	176.909	167.725	162.002	167.083	142.579	153.784	160.578	188.119	183.557	133.46	182.01
Cyp4a12a	277753	chr4:115299046-115332815:+	187.578	247.609	173.858	120.194	128.017	80.4333	160.418	70.4547	152.058	134.528	83.5016	190.349
Arf1	11840	chr11:59211412-59228267:-	187.373	199.918	209.134	191.828	200.781	219	191.319	197.443	216.441	200.812	217.599	214.899
Aldh1a7	26358	chr19:20692953-20727556:-	187.08	214.686	195.457	159.173	156.025	115.417	199.638	149.481	145.853	130.793	200.634	155.45
Aspdh	68352	chr7:44465435-44467751:+	186.662	193.382	205.442	174.365	153.458	79.3239	172.259	123.308	195.797	192.685	58.8042	183.3
Cyp2d40	71754	chr15:82759833-82764122:-	185.883	265.372	202.078	95.2249	84.8258	43.6567	158.04	68.2512	160.973	170.41	41.4687	164.091
Mst1	15235	chr9:108080436-108085027:+	185.351	159.468	176.602	181.08	193.185	174.555	157.572	181.658	179.191	154.973	127.548	161.161
Prodh	19125	chr16:18071726-18089190:-	185.299	162.222	143.033	127.44	95.4716	26.3565	115.092	39.1759	170.016	139.732	14.1522	165.588
Ndufa10	67273	chr1:92439719-92473758:-	184.508	191.056	197.677	181.699	118.629	90.1398	144.737	94.3577	158.752	152.788	92.1181	163.592
Btf3	218490	chr13:98309897-98317006:-	184.294	184.96	192.005	191.762	137.315	120.18	167.638	113.343	186.788	187.447	148.571	181.225
Gng5	14707	chr3:146499836-146505543:+	184.082	199.064	205.651	195.122	158.827	147.789	185.762	132.951	203.7	218.393	149.009	179.661
1810008I18Rik	100503969	chr7:65804052-65806223:+	183.989	137.163	144.831	211.674	90.6511	87.1805	72.9417	87.9637	73.1735	74.4986	112.701	94.7326
Psmb3	26446	chr11:97703434-97713500:+	183.874	182.356	204.498	170.288	137.334	129.91	162.957	103.17	180.604	189.249	133.858	163.228
Lonp2	66887	chr8:86624043-86716638:+	183.364	217.621	192.611	138.562	169.548	138.004	192.504	152.755	165.267	152.386	136.825	209.188
Gdi2	14569	chr13:3538075-3566261:+	183.222	187.519	176.384	186.192	135.592	117.889	148.996	119.96	166.348	150.975	137.836	175.527
Amfr	23802	chr8:93971588-94012640:-	183.05	197.093	172.296	221.79	213.052	147.391	188.796	164.817	194.652	173.702	154.6	205.255
Lect2	16841	chr13:56542460-56548538:-	182.599	163.096	167.368	106.485	124.791	110.509	184.297	130.078	184.657	152.77	61.0176	160.039
Esd	13885	chr14:74732297-74750765:+	182.583	194.649	195.652	185.979	119.061	59.9609	159.831	79.9719	176.024	158.919	65.8169	172.285
Gclm	14630	chr3:122245557-122267215:+	182.485	215.484	178.985	203.375	185.232	60.5712	172.207	86.3307	183.727	166.976	66.3988	215.889
Ndufb2	68198	chr6:39592583-39599471:+	182.159	178.068	191.87	166.748	120.542	102.518	152.341	94.9931	161.769	162.419	102.559	144.849
Pgm2	72157	chr4:99929451-99987294:+	181.153	217.101	192.899	197.174	153.614	93.4137	180.371	118.109	168.303	160.313	106.888	198.728
Canx	12330	chr11:50293957-50325673:-	179.76	184.069	176.896	194.049	174.427	142.147	160.862	155.763	176.88	160.945	160.313	186.15
Smdt1	69029	chr15:82346046-82349062:+	179.631	189.977	196.143	176.293	135.583	115.373	166.981	110.185	181.186	173.895	104.231	161.8
Swi5	72931	chr2:32278805-32288069:-	179.343	180.308	194.072	167.31	133.219	143.113	155.015	135.608	164.099	182.952	139.294	148.97
Acsl5	433256	chr19:55253369-55296628:+	178.721	164.934	170.689	185.434	116.883	68.1089	134.886	88.3928	114.386	93.7733	68.3069	135.408
Lsr	54135	chr7:30957770-30973469:-	178.403	158.839	151.414	180.843	189.078	158.345	169.805	153.61	197.823	168.997	146.456	187.382
Pink1	68943	chr4:138313410-138326296:-	177.562	183.323	191.354	188.376	161.79	113.486	170.637	114.412	152.777	148.435	103.884	150.62
Ndufb7	66916	chr8:83566758-83571623:+	176.47	195.413	219.058	173.979	138.355	118.126	174.487	114.295	179.5	194.318	108.305	156.538
Pttg1ip	108705	chr10:77581767-77598732:+	176.384	193.145	187.762	180.374	167.281	111.522	190.991	124.227	193.018	168.626	106.103	196.863
F7	14068	chr8:13026034-13035805:+	176.296	166.934	150.79	159.146	124.163	55.178	112.397	86.6327	163.651	170.283	44.7506	166.65
Iah1	67732	chr12:21316392-21323607:+	176.257	184.787	167.755	223.692	109.455	63.7758	116.495	79.2388	149.581	147.539	53.4748	162.859
Serpina11	380780	chr12:103980243-103989957:-	175.351	183.396	168.494	161.612	186.705	185.385	186.761	199.718	181.252	195.719	207.641	177.263
Iscu	66383	chr5:113772812-113778282:+	175.044	183.834	191.452	161.136	130.423	123.963	148.839	109.12	163.037	156.242	107.594	146.378
Slc29a1	63959	chr17:45585200-45599603:-	174.338	150.48	159.15	134.981	123.259	55.176	120.635	65.9741	195.615	163.549	33.6917	149
Arl6ip1	54208	chr7:118118890-118129625:-	173.903	203.516	180.218	160.684	118.595	59.2411	147.302	72.0511	168.972	156.467	60.3272	187.546
Ghitm	66092	chr14:37120445-37135322:-	172.978	196.944	175.155	195.022	119.21	99.1306	153.227	97.5244	148.107	141.25	115.733	169.964
Pgk1	18655	chrX:106187100-106203699:+	172.782	182.662	179.825	185.068	129.372	107.585	147.069	103.908	150.087	128.482	152.791	168.027
F9	14071	chrX:59999464-60030760:+	172.721	172.656	142.431	175.33	146.61	103.12	149.277	140.885	159.67	147.186	89.5147	185.508
Gstk1	76263	chr6:42245935-42250441:+	172.515	179.115	174.614	179.29	103.352	46.8577	141.316	63.3818	140.214	141.025	30.3986	157.224
Nr1i3	12355	chr1:171213970-171218845:+	171.921	231.899	216.158	97.0156	178.296	64.7932	183.195	124.772	145.009	115.475	31.0457	152.451
Slc7a2	11988	chr8:40862367-40922070:+	171.77	156.521	112.618	284.962	77.9065	72.5551	98.8893	75.317	138.919	99.8036	69.7729	170.174
Tbca	21371	chr13:94788943-94842899:+	171.635	169.687	167.93	162.372	134.945	139.587	148.755	118.946	167.237	159.621	162.853	157.384
Rnasek	52898	chr11:70238123-70239852:-	171.599	175.235	187.916	165.454	135.534	138.888	174.687	136.46	186.27	185.278	162.397	163.14
Steap4	117167	chr5:7960472-7982213:+	171.273	213.369	137.631	172.573	462.604	1452.2	476.16	1289.83	256.901	404.266	1859.47	377.28
Rpl22l1	68028	chr3:28805511-28807424:+	170.385	138.506	181.315	148.34	152.77	188.944	193.345	161.622	138.095	129.054	204.499	106.888
Paics	67054	chr5:76951302-76967509:+	170.248	178.195	159.744	190.548	96.9864	59.4517	117.036	78.4493	136.381	124.636	131.255	164.274
Bcap31	27061	chrX:73686178-73717815:-	169.954	183.342	176.355	171.908	117.964	84.5338	143.504	92.8569	163.309	161.785	91.3016	155.6
Tmem147	69804	chr7:30727701-30729534:-	169.888	163.378	183.606	157.159	125.988	81.6127	154.054	81.3968	172.737	169.358	73.7881	148.554
Ywhae	22627	chr11:75732887-75765841:+	169.794	180.849	175.772	182.794	136.708	119.82	161.636	127.419	168.453	165.548	151.723	180.083
Selenow	20364	chr7:15917208-15922371:-	168.525	185.468	192.041	159.874	111.079	64.6803	175.673	84.1894	179.807	189.519	62.6412	162.919
Psma6	26443	chr12:55384222-55418459:+	168.442	156.566	171.194	162.733	130.637	100.572	152.986	110.461	161.709	153.214	122.661	159.319
S100a10	20194	chr3:93555117-93564645:+	168.246	186.109	183.404	76.0474	160.443	149.853	201.625	138.226	142.896	162.932	121.565	146.796
Pcbp1	23983	chr6:86524480-86526189:-	167.734	154.002	173.956	158.332	132.903	118.49	141.927	112.369	195.254	164.64	147.792	182.645
Acad11	102632	chr9:104063703-104127646:+	167.488	210.721	188.62	161.524	168.675	117.04	194.75	146.907	154.475	142.824	114.768	218.423
Prdx4	53381	chrX:155323918-155338460:-	167.487	156.81	160.525	172.352	136.312	131.079	138.88	143.472	156.029	154.544	129.106	149.071
Paqr9	75552	chr9:95559817-95562121:+	167.325	210.503	176.812	125.44	237.655	131.674	212.135	137.697	195.511	168.194	179.632	220.751
Ndufa8	68375	chr2:36036334-36049292:-	166.862	176.866	195.811	155.555	137.152	118.314	170.137	99.0134	172.413	178.721	116.489	154.216
Kyat3	229905	chr3:142701048-142744911:+	166.765	135.43	196.891	150.459	126.269	85.878	120.209	104.862	138.729	109.976	103.939	163.669
Rpl31	114641	chr1:39367851-39371910:+	166.715	164.704	181.191	155.703	133.156	134.774	167.387	125.104	163.123	180.418	134.674	119.034
Blvrb	233016	chr7:27447978-27465981:+	166.022	183.965	201.882	118.916	132.962	141.125	163.102	144.589	149.066	156.53	151.622	136.867
Amdhd1	71761	chr10:93523338-93540033:-	165.814	162.552	176.114	197.098	91.5007	61.2283	101.573	72.733	146.732	130.65	44.2613	154.043
Pabpc1	18458	chr15:36595658-36608973:-	165.679	155.273	159.61	178.897	144.494	140.141	143.296	140.621	159.967	136.519	169.259	167.123
Rdh16f2	216454	chr10:127866476-127877319:+	165.548	136.314	144.046	188.801	109.9	40.4015	90.9374	83.6162	126.069	133.495	15.1303	125.262
Dio1	13370	chr4:107291465-107307168:-	165.29	166.024	168.256	43.3647	125.798	139.036	125.102	95.2681	105.143	127.225	87.6933	185.067
Alas1	11655	chr9:106233455-106247954:-	165.18	321.25	281.087	300.612	160.913	81.213	219.407	64.8705	427.823	416.591	75.6877	284.822
Slc6a13	14412	chr6:121300296-121337718:+	164.596	173.845	195.531	160.632	158.634	82.534	154.217	113.749	165.197	146.69	66.3176	154.012
Hypk	67693	chr2:121457088-121458440:+	163.922	160.885	176.843	144.374	120.08	138.756	144.704	123.848	154.639	172.9	137.874	137.504
Grcc10	14790	chr6:124739184-124741079:-	163.903	170.484	193.933	159.588	114.171	57.3042	153.661	70.707	153.511	144.421	53.1119	144.004
Acadl	11363	chr1:66830839-66863309:-	163.374	216.723	174.351	167.06	138.11	135.296	207.582	138.438	151.573	152.724	156.935	169.459
Akr7a5	110198	chr4:139310744-139318786:+	163.03	178.379	177.483	152.762	98.5454	48.7816	124.454	59.0621	146.751	128.713	38.6777	146.314
Dhrs1	52585	chr14:55739020-55745684:-	162.914	194.473	176.546	141.001	147.062	114.137	169.761	122.621	170.718	128.164	85.9768	181.728
Cpt1a	12894	chr19:3323301-3385733:+	162.796	206.563	161.124	178.642	163.731	112.133	183.798	126.336	162.85	155.868	108.027	263.345
Ivd	56357	chr2:118862000-118881357:+	162.278	164.654	156.549	179	92.5562	34.6766	109.042	57.6272	145.327	121.315	24.4023	161.831
Arf5	11844	chr6:28423640-28426499:+	161.831	158.222	169.263	170.324	112.586	74.2081	120.492	83.751	157.851	159.271	84.0802	139.502
Eif4g1	208643	chr16:20672727-20692883:+	161.514	175.524	149.839	166.265	164.201	131.757	153.731	142.189	159.566	130.563	158.476	199.62
Ly6e	17069	chr15:74955051-74959905:+	161.357	144.499	145.552	163.366	181.219	160.72	163.986	176.776	236.837	219.317	147.111	200.11
Idh3b	170718	chr2:130279309-130284451:-	161.264	169.263	170.11	166.563	92.6202	61.0087	129.317	61.8863	128.576	125.285	62.1223	146.642
Srebf1	20787	chr11:60199084-60220627:-	161.09	160.383	163.632	141.134	58.9519	15.2275	39.8359	25.8924	125.015	79.9857	19.2253	118.39
Tm7sf2	73166	chr19:6062821-6067850:-	160.917	159.657	168.697	139.868	82.5527	62.8414	111.858	73.7266	137.275	101.262	56.4835	147.346
Shmt2	108037	chr10:127517123-127522444:-	160.719	159.237	179.406	138.882	107.939	51	120.207	57.9077	161.776	134.16	73.5516	166.496
Cyp2d22	56448	chr15:82370527-82380260:-	160.674	136.215	161.193	140.939	123.673	59.5372	132.976	77.4704	158.452	112.977	44.9122	145.322
Ndufv1	17995	chr19:4007499-4012755:-	160.602	167.13	166.672	160.341	105.713	99.383	139.311	94.2256	132.237	124.847	99.9731	142.621
Vdac1	22333	chr11:52360862-52389397:+	160.596	172.294	171.689	177.609	104.479	63.235	162.755	71.2671	151.408	131.741	72.411	165.691
Ubxn1	225896	chr19:8871559-8875656:+	160.251	151.242	168.293	144.191	115.802	93.0781	146.689	77.159	142.444	132.435	98.4638	123.53
Rpl5	100503670	chr5:107900528-107909005:+	160.23	163.394	175.609	173.467	140.226	132.956	160.494	124.703	163.571	168.013	158.222	140.296
Pfdn5	56612	chr15:102326116-102331489:+	159.638	160.761	177.315	152.999	126.379	116.207	152.404	108.825	155.663	164.72	118.487	124.846
Cyp4f14	64385	chr17:32905070-32917342:-	159.459	132.199	120.862	169	42.1782	4.95546	44.6068	10.8634	124.635	66.4601	3.77681	113.835
Lars2	102436	chr9:123366927-123462675:+	159.41	122.799	149.527	108.63	113.425	89.4883	132.737	101.854	171.863	130.086	83.7714	120.585
Bnip3	12176	chr7:138890836-138909506:-	159.026	206.322	184.92	201.474	139.276	43.6372	193.838	82.2141	178.015	166.449	115.496	195.428
Ugdh	22235	chr5:65413222-65435842:-	158.921	142.374	126.812	172.404	98.0231	21.3284	90.7744	28.4584	139.437	90.636	39.4944	155.981
Spr	20751	chr6:85133680-85137764:-	158.823	163.635	171.936	155.872	129.732	88.6624	138.162	100.878	157.557	154.478	94.5647	157.269
Psma1	26440	chr7:114264550-114276116:-	158.56	141.176	146.949	143.111	118.988	81.3912	137.2	77.0148	145.641	134.559	107.595	151.146
D8Ertd738e	101966	chr8:84246235-84249761:-	157.729	173.299	184.732	156.437	135.27	118.035	163.199	111.521	169.486	181.874	118.214	138.279
Ei24	13663	chr9:36779153-36797393:-	157.511	182.452	151.27	162.382	170.159	107.097	185.5	129.893	168.091	162.223	82.7578	157.109
Ndufc1	66377	chr3:51405479-51408955:-	157.441	158.162	174.384	140.686	109.506	100.376	144.143	90.4258	160.387	140.963	90.8723	131.482
Psmb5	19173	chr14:54614120-54617995:-	157.419	157.784	175.964	139.648	115.452	129.362	138.345	103.31	142.334	153.752	136.988	151.042
Slco1a1	28248	chr6:141907281-141946962:-	157.274	130.802	114.477	93.0881	18.7687	6.1692	27.7832	8.4246	60.0316	42.0426	5.46658	89.0615
Hdlbp	110611	chr1:93405940-93478917:-	157.109	164.591	156.164	166.109	170.882	159	148.711	172.864	161.059	140.476	169.697	178.163
Aup1	11993	chr6:83054521-83057682:+	156.788	158.638	167.821	147.495	114.911	93.3609	126.943	99.7635	150.105	160.151	85.2998	145.086
Fabp5	16592	chr3:10012585-10016610:+	156.624	83.4662	168.088	97.1316	15.9157	31.1674	26.7814	10.642	56.8025	115.834	77.6633	78.186
Laptm4a	17775	chr12:8921307-8938741:+	156.496	162.875	153.616	170.753	132.292	122.746	153.086	130.217	158.747	153.561	134.665	152.657
Psme2	19188	chr14:55587440-55591101:-	156.078	161.267	156.486	140.409	107.043	86.6379	124.416	82.6963	145.228	159.895	91.5266	132.111
Psen2	19165	chr1:180227004-180256300:-	155.988	138.052	149.11	125.373	108.971	88.4266	106.566	101.544	135.328	116.906	46.4053	116.743
Hmgcs1	208715	chr13:119690351-119708260:+	155.696	190.293	183.794	142.889	312.109	321.761	221.795	217.061	124.516	62.0142	168.832	114.168
Fkbp2	14227	chr19:6977739-6980461:-	155.427	158.387	175.103	147.429	131.937	116.487	140.197	118.015	146.7	170.065	110.374	126.137
Atp1a1	11928	chr3:101576219-101604707:-	155.22	188.259	153.564	190.158	163.32	167.323	166.058	180.902	176.295	158.222	219.315	191.683
Mlf2	30853	chr6:124931388-124936149:+	155.065	170.956	171.298	159.152	120.923	102.193	139.169	96.6766	152.768	144.703	110.4	150.349
Dnajc22	72778	chr15:99099484-99104707:+	154.682	153.637	132.73	144.939	136.303	106.637	127.539	112.947	128.66	106.558	107.284	148.144
Aass	30956	chr6:23072173-23132986:-	154.492	147.693	119.269	188.671	91.9731	89.204	111.145	89.1239	137.865	108.951	73.5044	172.825
D17Wsu92e	224647	chr17:27751232-27820542:-	154.263	188.294	160.906	178.596	159.223	113.274	162.675	115.884	148.477	145.083	122.955	169.381
Akr1c13	27384	chr13:4191187-4205603:+	154.092	178.596	159.348	159.246	82.0647	43.4079	108.426	49.2263	115.695	107.653	43.863	128.668
Pebp1	23980	chr5:117282651-117287564:-	153.757	179.642	179.242	128.099	92.5194	81.5219	137.052	80.6771	131.627	133.93	98.2705	135.244
Tmem150a	232086	chr6:72355483-72359762:+	153.739	144.265	165.692	152.15	142.486	77.2046	115.308	98.3575	170.737	144.056	70.6739	129.885
F5	14067	chr1:164151835-164220277:+	153.626	158.676	116.925	159.163	134.098	87.4062	115.894	118.156	107.574	95.5958	74.4381	148.719
Srpr	67398	chr9:35211203-35217003:+	153.567	176.351	170.678	160.117	170.412	207.319	159.475	182.368	167.224	162.809	240.709	176.119
Gckr	231103	chr5:31297581-31327302:+	153.142	142.572	137.854	159.003	119.978	74.3633	131.809	97.266	152.181	125.057	71.3189	122.826
2410015M20Rik	224904	chr17:56607452-56609771:-	152.994	143.218	149.728	145.298	123.701	107.68	132.727	100.972	144	132.868	96.4607	135.583
F13b	14060	chr1:139501707-139523756:+	152.978	151.97	126.096	142.353	106.458	48.203	106.228	78.3989	122.664	102.013	39.7081	160.581
Dstn	56431	chr2:143915331-143943324:+	152.737	158.502	154.937	172.375	123.405	119.999	129.715	121.731	142.933	134.112	151.473	151.498
Fam25c	69134	chr14:34351882-34355393:-	152.466	167.449	174.249	129.021	138.143	106.391	135.461	89.3945	146.086	197.682	94.8545	157.177
Shmt1	20425	chr11:60788897-60811265:-	152.193	132.092	136.339	130.503	105.348	23.2639	101.145	47.1352	147.354	93.9452	16.9855	142.511
Pbld2	67307	chr10:63024512-63058812:+	152.15	158.655	170.75	132.581	97.3299	18.6688	113.712	38.1428	142.526	107.996	11.9922	144.574
Zfp36	22695	chr7:28376784-28379228:-	151.713	124.086	189.754	86.8407	191.124	91.2933	142.238	76.0102	170.157	120.877	62.0301	169.875
Anapc13	69010	chr9:102626296-102634244:+	151.484	152.87	164.298	138.596	113.581	101.168	130.512	95.7594	139.36	159.899	85.6454	122.479
Acat1	110446	chr9:53580522-53610350:-	151.481	225.762	181.325	149.746	160.704	209.71	193.334	201.05	135.799	135.045	204.839	159.925
Ndufb6	230075	chr4:40270591-40279421:-	151.038	143.591	156.257	135.896	96.6425	77.7652	112.636	79.2209	135.429	116.429	76.7393	130.283
Psmd4	19185	chr3:95032691-95042614:-	151.018	141.041	162.648	133.878	114.164	93.64	141.879	77.8403	144.545	142.377	109.028	137.153
Decr2	26378	chr17:26081211-26090164:-	150.927	197.466	184.561	103.022	110.112	37.1568	149.44	48.884	122.283	123.19	26.3906	182.92
Aplp2	11804	chr9:31149557-31211815:-	150.927	169.934	141.475	150.455	116.92	61.2493	128.579	78.0713	146.103	119.767	55.8656	162.126
Bloc1s1	14533	chr10:128919914-128923524:-	150.15	177.329	174.522	137.051	132.707	115.362	149.814	113.98	168.523	190.434	117.329	162.941
Hsd17b11	114664	chr5:103989765-104021796:-	150.057	175.994	153.781	126.686	114.429	41.5719	159.165	62.0966	138.525	140.867	45.759	148.412
Ugp2	216558	chr11:21321126-21371267:-	149.602	133.441	127.001	141.566	71.2293	45.3207	100.93	61.1056	92.8176	73.8352	46.306	108.048
Prdx2	21672	chr8:84969622-84974810:+	149.482	156.348	154.417	135.741	97.5859	68.0182	120.953	73.8952	128.728	140.502	66.0317	138.847
Ugt2b35	243085	chr5:87000860-87013274:+	149.321	122.687	124.123	111.861	84.4231	43.5413	82.8544	46.9043	98.3082	67.4672	44.1732	100.145
Cldn3	12739	chr5:134986214-134987476:+	149.301	143.469	161.866	133.449	133.495	110.852	124.737	117.323	128.016	130.302	112.162	126.822
Acads	11409	chr5:115110299-115119346:-	149.091	184.806	168.766	132.666	121.733	88.5162	141.615	98.095	137.763	139.089	82.844	144.93
Tuba4a	22145	chr1:75214972-75219294:-	149.047	123.202	173.206	134.96	94.1977	67.9579	99.0615	72.8297	150.689	117.031	85.0453	120.5
Sqor	59010	chr2:122765359-122809551:+	148.87	164.638	153.429	194.251	79.8088	35.0281	101.208	53.0266	129.537	114.933	47.6405	142.928
Lrp1	16971	chr10:127538158-127621148:-	148.729	179.773	122.744	157.142	182.148	115.648	164.596	158.758	144.025	128.64	104.141	173.463
Ndufs7	75406	chr10:80249452-80256792:+	148.727	159.189	179.028	141.762	109.116	80.0265	148.31	85.0375	137.008	152.765	75.5195	135.383
Etfdh	66841	chr3:79603788-79628767:-	148.599	194.533	149.754	144.639	158.285	136.392	184.12	143.771	132.973	117.259	157.889	170.456
C2	12263	chr17:34862602-34882100:-	148.481	124.096	114.958	134.305	108.41	85.4676	86.9644	107.376	117.859	112.103	59.904	139.412
Eci1	13177	chr17:24426683-24439316:+	148.363	195.139	178.442	121.373	109.492	57.3899	178.357	71.6845	126.543	134.009	50.7792	143.194
Hoga1	67432	chr19:42045851-42070939:+	148.316	152.527	145.595	140.116	104.634	69.7669	96.5531	83.3027	119.017	111.025	63.9819	123.58
Slc22a30	319800	chr19:8335623-8405105:-	147.76	123.322	134.142	131.383	63.9929	12.7089	66.2013	31.8005	93.022	74.1039	10.1338	103.477
Hsd17b12	56348	chr2:94032697-94157909:-	147.199	168.221	151.931	136.658	125.425	137.591	144.776	129.803	132.074	121.925	136.661	156.004
Naprt	223646	chr15:75890964-75894481:-	147.116	157.103	154.425	131.754	120.356	63.6741	134.506	86.0368	169	157.606	57.0682	153.177
Abcc2	12780	chr19:43782308-43838218:+	146.882	151.414	124.063	158.879	138.924	79.3244	118.206	95.0827	124.925	81.7094	63.4408	149.632
Chmp2a	68953	chr7:13032006-13034777:-	146.777	156.333	160.988	142.786	122.761	130.272	141.228	100.741	137.237	149.434	129.991	130.848
Psmc1	19179	chr12:100112331-100123364:+	146.343	144.229	151.154	149.216	111.489	76.921	125.867	76.232	140.778	127.101	102.773	147.002
Ufc1	66155	chr1:171288564-171294982:-	146.278	154.033	166.105	147.243	118.614	117.244	127.427	98.9922	143.618	157.718	125.913	135.942
Leap2	259301	chr11:53422181-53423136:-	146.24	136.363	138.549	75.6677	114.823	128.506	151.659	114.767	126.942	138.434	193.613	90.4149
Map1lc3b	67443	chr8:121590468-121598047:+	146.202	164.627	151.142	164.893	188.891	197.932	235.875	176.129	182.78	190.678	198.364	183.474
Aamp	227290	chr1:74279840-74284738:-	146.18	159.561	163.477	155.109	123.212	97.5373	135.871	98.6582	146.113	142.775	106.876	146.951
Slc31a1	20529	chr4:62360701-62391769:+	146.107	157.116	139.586	147.174	137.819	76.9499	136.229	101.444	153.756	148.489	74.6417	160.608
Os9	216440	chr10:127094259-127121160:-	146.067	131.689	139.922	138.846	139.834	132.474	126.545	143.915	136.58	135.635	102.564	142.386
Gltpd2	216871	chr11:70519209-70520736:+	145.96	151.938	146.551	128.866	144.402	101.833	157.364	129.512	161.378	163.201	85.6808	166.58
Abat	268860	chr16:8513429-8621567:+	145.304	148.626	126.346	162.191	116.677	46.5881	110.923	77.8022	124.171	92.7352	18.9991	160.4
Krtcap2	66059	chr3:89246438-89249729:+	145.271	143.204	172.384	130.339	146.405	216.365	144.052	181.32	158.003	171.412	213.504	122.706
Nedd8	18002	chr14:55662267-55671906:-	145.154	152.023	163.524	133.578	105.167	100.185	128.638	89.8877	147.821	164.902	107.413	127.267
Ndufs3	68349	chr2:90894636-90904721:-	144.029	150.973	158.896	141.802	102.877	85.8943	124.674	80.8102	134.372	128.219	88.9648	141.244
Cyp4f15	106648	chr17:32685631-32703352:+	143.982	133.82	128.299	139.735	82.0179	35.7965	99.9751	51.4584	106.389	96.1196	15.8838	143.443
Gm10768	100038628	chr19:43838803-43840845:+	143.955	142.768	146.126	141.742	100.391	50.4417	112.098	61.336	140.807	113.509	38.4623	118.587
Fkbp4	14228	chr6:128430107-128438631:-	143.852	136.198	163.47	116.756	94.7623	35.6182	99.4978	45.8903	162.134	120.734	27.8545	151.568
Lamtor2	83409	chr3:88549819-88552927:-	143.314	138.859	148.151	119.068	113.371	91.7038	120.508	95.1254	132.202	132.113	79.4173	119.218
Eif4a2	13682	chr16:23107397-23114138:+	143.098	135.749	129.586	133.356	88.8169	55.1174	118.367	57.83	119.179	100.302	62.7892	129.665
Dnajc3	100037258	chr14:118937932-118981702:+	142.961	151.289	144.04	146.756	164.079	186.106	136.421	194.86	132.216	129.098	199.785	144.955
Aldh9a1	56752	chr1:167349991-167368530:+	142.865	167.637	162.943	127.065	113.527	90.0779	140.953	103.552	121.086	112.062	71.527	147.75
Igf1	16000	chr10:87858265-87937047:+	142.742	132.897	140.954	151.056	100.726	85.6986	111.524	85.0887	138.234	115.888	99.417	144.076
Gcsh	68133	chr8:116981828-116993449:-	142.664	147.42	150.93	141.621	103.166	43.8058	125.799	57.375	140.592	123.274	39.0721	133.819
Tkfc	225913	chr19:10592197-10604258:-	142.632	182.301	158.555	141.122	121.706	101.743	134.477	104.995	154.932	155.346	131.287	210.628
D10Jhu81e	28295	chr10:78162067-78169768:-	142.529	160.197	151.052	141.571	96.9562	55.1962	129.832	68.5653	142.482	135.39	47.7313	140.479
Sec14l4	103655	chr11:4031782-4048009:+	141.804	158.984	132.624	158.268	175.56	136.723	133.031	150.013	148.59	122.568	98.1676	176.074
Capns1	12336	chr7:30186934-30195153:-	141.555	154.257	163.862	137.579	118.829	109.354	153.48	98.0626	149.922	146.907	114.341	133.386
Retreg2	227298	chr1:75142786-75147909:+	141.548	154.888	144.396	149.739	99.582	61.8294	113.285	69.8719	129.742	125.523	68.3578	153.036
Fcgrt	14132	chr7:45092993-45103822:-	141.484	175.174	168.146	132.003	108.987	66.0986	138.027	79.9289	133.821	139.394	73.3233	139.024
Mrpl52	68836	chr14:54426909-54429750:+	141.275	141.244	162.703	136.32	116.139	139.448	147.629	116.307	142.103	151.041	149.916	116.185
Aars	234734	chr8:111033842-111055569:+	141.19	129.25	129.527	118.75	116.879	85.5834	113.457	80.5065	139.634	122.282	116.866	138.442
Eif4g2	13690	chr7:111067985-111083030:-	141.082	156.133	135.877	157.443	125.364	118.082	138.895	109.151	143.34	124.46	153.753	146.173
Eif3h	68135	chr15:51786563-51865461:-	140.668	140.919	145.721	149.244	116.793	95.8992	131.619	98.4407	137.743	135.617	96.6985	135.991
Gsto1	14873	chr19:47854973-47864788:+	140.39	140.574	133.692	139.247	51.2621	19.2526	75.4669	24.7512	111.341	102.349	20.6626	116.756
Dhrs4	28200	chr14:55478758-55490340:+	140.332	185.233	162.519	121.136	120.998	76.5789	169.137	100.293	137.214	149.426	82.8726	154.927
Mrfap1	67568	chr5:36794867-36796754:-	139.706	144.898	144.188	144.979	117.859	114.681	139.064	110.117	149.805	149.053	121.408	145.857
Txndc5	105245	chr13:38500271-38528824:-	139.373	140.978	160.604	124.995	141.103	144.924	109.934	140.852	143.031	137.8	126.747	131.011
Glyctk	235582	chr9:106152860-106158138:-	139.169	156.427	156.492	137.357	141.969	168.486	133.759	166.944	159.734	146.264	98.1538	172.138
Taldo1	21351	chr7:141392160-141402976:+	139.138	154.986	151.14	122.952	107.836	92.4556	125.301	91.537	139.022	130.563	80.0221	131.375
Erg28	58520	chr12:85815455-85824545:-	138.81	148.011	145.059	126.019	119.582	106.969	121.985	89.6058	115.081	103.058	64.0512	112.687
St13	70356	chr15:81365044-81399694:-	138.684	130.627	133.258	152.747	107.022	74.0229	117.76	78.7668	132.136	99.6443	87.1748	153.336
Eif5	217869	chr12:111538101-111546753:+	138.666	146.369	133.613	137.473	116.286	98.0112	124.9	94.4445	138.685	120.599	152.018	148.227
Ybx1	22608	chr4:119277327-119294513:-	138.545	147.451	150.619	151.28	99.4614	90.8229	120.742	84.9349	125.46	125.216	100.941	127.653
Prdx3	11757	chr19:60864066-60874538:-	138.49	137.953	121.311	127.135	94.1509	113.296	116.047	94.256	125.098	115.888	101.164	122.274
Dazap2	23994	chr15:100615662-100620761:+	138.322	141.403	143.779	141.238	116.73	84.4574	130.86	85.3626	137.082	131.559	107.096	124.995
Elovl5	68801	chr9:77917365-77984519:+	138.146	157.835	142.248	144.223	84.0553	57.2385	112.474	56.7094	117.725	119.68	74.5693	123.032
Slc39a14	213053	chr14:70303467-70351424:-	138.117	149.044	106.39	163.917	225.323	226.389	189.61	230.781	165.97	167.648	338.95	171.648
C130074G19Rik	226777	chr1:184871926-184883036:-	137.42	146.994	139.32	127.057	135.083	77.7891	133.465	105.761	132.568	117.693	58.7161	134.382
Klkb1	16621	chr8:45266688-45294835:-	137.053	148.18	128.703	151.935	87.8801	26.9237	94.1887	55.2499	103.298	91.0992	12.2305	129.284
Rpn2	20014	chr2:157279098-157326318:+	136.936	136.037	135.471	124.949	146.887	151.092	139.982	158.525	134.563	124.502	143.528	131.864
Agxt2	268782	chr15:10358533-10410153:+	136.495	130.267	108.401	130.386	106.215	87.445	116.166	96.531	116.356	100.798	68.8436	124.021
Apol9b	71898	chr15:77729072-77736382:+	136.376	123.734	126.674	129.421	34.3866	4.59	36.7809	9.9005	95.306	97.7492	13.9265	136.63
Cox7a2l	20463	chr17:83501917-83514333:-	136.239	144.222	142.592	128.967	111.331	85.441	130.202	80.9209	147.609	130.613	86.46	137.852
Tspan12	269831	chr6:21771395-21852515:-	136.006	133.142	121.891	127.86	87.5853	56.7874	105.008	72.6037	105.051	96.4381	63.5913	127.735
Ak2	11637	chr4:128993224-129011529:+	135.951	154.945	165.15	131.269	73.5847	35.4781	88.5775	47.5585	104.563	98.8146	44.7795	122.134
Serinc1	56442	chr10:57515775-57532529:-	135.888	141.361	125.119	138.297	136.88	142.259	143.295	139.892	131.484	115.753	147.895	148.806
Tmem37	170706	chr1:120067377-120073780:-	135.779	131.124	158.439	118.901	122.65	80.7622	142.813	87.4751	145.707	135.968	58.7042	125.661
Acsf2	264895	chr11:94557102-94601786:-	135.691	151.857	138.149	100.955	93.6427	57.8877	116.563	62.0112	109.934	102.464	61.2492	139.587
Spp2	75396	chr1:88407010-88426438:+	135.08	145.508	141.352	75.2295	74.1227	61.0781	90.6594	52.6562	119.034	112.797	32.8116	115.151
Ppp1ca	19045	chr19:4192174-4195419:+	134.88	159.375	148.512	124.462	106.025	96.376	135.692	97.3797	133.101	114.838	103.321	127.619
Psma2	19166	chr13:14613242-14625673:+	134.79	134.232	145.845	127.42	108.868	80.5587	119.71	70.6562	135.853	133.77	100.326	126.064
Tlcd2	380712	chr11:75468050-75470899:+	134.633	107.603	127.52	53.7412	49.0496	15.1787	49.5146	17.6857	76.8041	63.3284	10.3889	97.7574
Efna1	13636	chr3:89271730-89280951:-	134.391	84.3484	121.246	104.947	108.985	65.5204	89.1245	79.6313	68.7813	35.242	254.73	78.2572
H3f3b	15081	chr11:116021961-116024504:-	134.357	131.367	141.454	123.681	106	132.941	137.114	103.824	141.474	132.508	176.167	158.213
Rrbp1	81910	chr2:143947395-144011263:-	134.199	120.119	139.132	163.473	153.599	135.252	118.758	142.351	141.049	135.756	149.166	130.024
Cxcl12	20315	chr6:117168535-117181368:+	134.134	136.254	124.25	114.71	109.298	35.6849	96.1096	62.9617	138.933	98.0002	44.8059	135.605
Ndufb5	66046	chr3:32737063-32751559:+	133.946	132.773	143.148	132.605	85.6027	63.024	113.037	62.6152	125.202	117.695	58.7512	117.398
Lypla1	18777	chr1:4807823-4846735:+	133.891	129.234	117.058	123.872	93.7929	51.5619	111.377	66.6791	120.35	92.4522	55.965	137.894
Ndufa9	66108	chr6:126821863-126849144:-	133.673	135.023	134.502	130.226	79.1085	64.6083	103.649	63.7925	111.943	107.154	63.9884	115.425
Hnrnpk	15387	chr13:58391132-58403343:-	133.241	129.476	119.698	133.602	115.68	96.4917	120.408	105.376	127.096	111.981	127.859	138.326
Eva1a	232146	chr6:82041628-82093099:+	133.128	130.937	130.299	102.948	96.2648	55.1326	104.557	82.4645	115.277	120.533	86.9282	110.39
Cnpy2	56530	chr10:128322459-128327187:+	133.05	130.924	138.634	111.204	96.4474	99.8901	110.675	90.8215	116.476	142.914	83.9988	109.24
Akr1c12	622402	chr13:4268172-4279399:-	132.952	138.961	137.389	136.829	74.0987	45.0857	96.3577	50.538	98.1784	93.1684	47.1438	113.498
Maob	109731	chrX:16709281-16817366:-	132.754	137.997	134.809	142.639	73.4633	23.0969	89.0297	41.3983	114.153	96.8571	22.6227	125.946
Bbox1	170442	chr2:110265083-110305725:-	132.69	164.733	144.442	118.089	107.065	52.5501	133.286	75.3408	112.113	100.635	34.2992	140.751
Lman1	70361	chr18:65980739-66002635:-	132.665	128.668	135.426	125.635	148.262	143.353	124.426	156.86	142.468	121.521	128.847	145.001
Tmbim4	68212	chr10:120208826-120224897:+	132.654	141.644	132.35	126.147	101.534	107.952	123.907	98.3081	124.513	124.913	105.726	128.031
Suclg2	20917	chr6:95473009-95718846:-	132.33	167.372	138.542	135.695	89.0573	61.5418	104.438	68.7093	115.381	118.619	59.7224	126.324
Tob1	22057	chr11:94211454-94215492:+	132.123	112.863	84.8413	108.547	42.5597	27.9507	57.5961	36.9373	89.1944	82.2117	49.739	122.346
Mydgf	28106	chr17:56176541-56183920:-	131.693	128.033	139.121	116.376	115.098	88.0526	111.97	90.8788	136.213	150.38	91.4995	123.918
Rcl1	59028	chr19:29101375-29143843:+	131.293	126.954	142.048	151.744	144.36	180.749	134.173	136.509	118.943	111.549	171.942	114.575
Mthfd1	108156	chr12:76255232-76319820:+	130.946	119.849	120.204	136.341	84.3665	31.9464	82.5556	46.7083	116.771	89.9647	23.4285	129.051
Sec61a1	53421	chr6:88503607-88518800:-	130.589	132.447	149.827	135.924	170.714	251.617	127.773	216.069	150.895	160.923	249.958	133.917
H2-Ke6	14979	chr17:34026033-34028055:-	130.328	135.902	143.71	119.362	86.8852	66.0355	95.332	71.2433	115.877	115.022	62.1594	114.387
Cyp4a10	13117	chr4:115518287-115533649:+	129.625	294.796	218.759	109.927	112.643	13.6373	306.167	24.244	144.501	133.079	11.9953	115.226
Igfals	16005	chr17:24878770-24882008:+	129.583	126.752	157.311	126.285	94.3188	8.25725	107.008	20.8615	144.758	93.2075	6.96639	128.505
Saraf	67887	chr8:34154563-34170847:+	129.514	133.255	137.684	139.46	129.097	118.997	130.63	123.623	125.782	123.249	120.253	128.586
1810058I24Rik	67705	chr6:35252699-35262059:+	129.504	173.847	136.037	95.3967	110.027	74.651	120.86	83.3834	117.8	146.451	88.5727	118.667
Psmd2	21762	chr16:20651652-20663414:+	129.45	130.321	127.74	124.65	108.722	89.8673	121.248	80.1943	121.566	104.792	106.72	134.619
Calm2	12314	chr17:87433401-87446935:-	129.411	134.893	129.042	142.974	143.479	150.974	139.789	139.77	129.495	121.901	147.905	127.583
Ces1g	12623	chr8:93302369-93337209:-	129.205	122.216	129.597	65.5023	31.3927	2.25408	60.4836	4.34147	118.217	78.3913	3.50959	104.784
Pccb	66904	chr9:100982032-101034884:-	129.196	141.092	133.063	136.306	83.5994	65.0679	99.4324	72.523	102.596	95.4753	67.4851	121.287
Ifi27	52668	chr12:103434189-103440245:+	129.071	115.85	84.999	91.4943	82.128	76.9416	94.5547	67.9367	112.555	99.5835	104.181	147.999
Slc25a13	50799	chr6:6041218-6217173:-	128.703	149.263	128.606	125.56	96.2268	38.8374	116.157	60.8059	120.21	95.3133	40.4396	152.243
Arpc2	76709	chr1:74236517-74268209:+	128.655	124.101	125.42	120.928	97.9461	75.5989	111.373	82.215	120.234	119.12	99.6223	119.756
Spint2	20733	chr7:29256330-29281977:-	128.59	124.739	131.877	93.659	103.63	123.355	113.283	101.073	118.434	135.399	135.394	125.951
Hacd3	57874	chr9:64986983-65021717:-	128.496	163.348	127.957	132.035	153.724	127.381	170.314	133.417	145.608	136.931	128.644	174.706
Gclc	14629	chr9:77754535-77794489:+	128.367	136.157	128.584	150.341	79.9724	49.7449	83.6374	55.712	79.6238	66.1446	84.1849	104.564
Glrx5	73046	chr12:105032618-105040911:+	128.305	147.123	151.577	104.127	103.787	73.7601	113.294	62.5636	124.892	124.822	64.0955	141.982
Nucb1	18220	chr7:45492674-45510408:-	128.298	138.909	134.948	118.774	117.189	93.45	122.336	99.1973	126.839	114.643	90.2924	124.266
Tmem243	652925	chr5:9100737-9118983:+	127.997	136.056	125.311	112.861	81.5092	56.3863	93.6667	55.6653	107.084	105.451	59.6275	114.834
Ggact	223267	chr14:122890860-122913165:-	127.56	128.407	132.36	132.362	101.934	59.3851	114.782	72.671	114.656	95.7606	56.9177	107.63
Ndufa13	67184	chr8:69894182-69902558:-	127.493	137.203	153.249	128.59	85.5101	74.5251	112.096	74.878	110.899	113.811	70.294	104.514
Cxcl1	14825	chr5:90891245-90893115:+	127.487	152.709	104.13	131.977	443.235	521.793	388.903	600.903	160.046	122.537	229.994	194.509
Sigmar1	18391	chr4:41738493-41741359:-	127.443	111.113	132.083	114.406	119.458	77.396	116.114	93.8027	130.564	100.865	77.0428	103.416
Psmb2	26445	chr4:126677643-126709715:+	127.166	126.64	143.719	123.958	99.2333	84.8709	110.885	74.0127	137.938	133.594	93.4984	127.403
Clta	12757	chr4:44012643-44032848:+	126.526	136.174	134.37	134.096	92.1291	78.5885	111.118	74.6286	127.821	132.767	91.3556	116.928
Dynll2	68097	chr11:87979525-87998298:-	126.519	128.051	118.271	129.249	74.3164	37.2736	83.357	44.5725	107.066	87.9723	42.3414	110.769
Tm4sf4	229302	chr3:57425410-57441675:+	126.406	150.318	136.51	163.87	115.988	95.1601	139.157	113.541	140.215	171.548	126.075	154.333
Selenok	80795	chr14:29968380-29975074:+	126.362	116.179	151.667	121.042	112.405	150.544	115.888	139.542	120.697	135.895	185.513	100.994
Trap1	68015	chr16:4039977-4077810:-	126.241	142.665	132.187	126.592	79.8956	62.6213	89.3302	63.0581	99.6358	86.7298	61.3472	113.077
Tubb4b	227613	chr2:25222158-25224702:-	126.058	102.614	148.977	92.5117	107.996	108.073	99.3538	83.636	134.642	113.608	165.855	123.057
Akr1c19	432720	chr13:4233740-4248359:+	125.977	146.346	132.726	161.842	49.0515	5.9507	58.914	9.48101	76.666	59.254	8.58886	99.8171
Psmd8	57296	chr7:29174187-29180673:-	125.92	137.849	136.992	125.292	111.631	128.158	137.803	103.426	128.742	124.606	156.3	132.113
Eif3i	54709	chr4:129591974-129600648:-	125.597	137.661	139.165	130.065	105.712	106.63	114.077	93.3528	117.582	114.275	111.785	111.041
Msra	110265	chr14:64122621-64455903:-	125.597	137.07	134.375	112.276	77.0678	53.9832	94.9044	53.6876	119.448	113.768	52.9045	118.94
Cops6	26893	chr5:138161102-138163984:+	125.4	137.499	138.485	125.443	127.422	117.142	158.818	107.45	132.9	139.425	117.371	127.537
Higd2a	67044	chr13:54590231-54591147:+	125.052	132.919	137.795	130.288	90.9762	78.8236	131.123	81.7236	131.827	127.069	84.7895	124.671
Rab7	19349	chr6:87999106-88045270:-	125.011	128.499	120.291	129.461	101.217	87.4877	115.356	94.4408	133.33	123.985	105.41	126.701
Ctnnb1	12387	chr9:120933400-120960507:+	124.756	122.673	104.724	129.652	114.55	97.8602	109.8	96.04	121.359	99.5804	114.418	135.202
Litaf	56722	chr16:10959273-10993121:-	124.53	131.617	107.989	141.048	146.021	145.869	148.814	128.19	154.072	182.89	254.247	167.198
Tmem97	69071	chr11:78541817-78550735:-	124.242	138.802	126.215	99.913	117.432	149.962	121.458	126.685	112.821	94.2883	115.987	116.146
Cbr1	12408	chr16:93607837-93610349:+	124.063	105.401	129.145	133.585	89.652	29.2829	78.8566	39.7314	124.231	100.812	24.8123	95.6974
Akr1d1	208665	chr6:37530173-37568815:+	123.835	106.671	111.869	114.937	72.5442	4.185	70.1573	17.1741	113.173	57.9479	3.61078	97.7462
Tspo	12257	chr15:83563573-83574203:+	123.726	141.917	129.193	111.528	117.231	131.629	126.397	114.026	134.364	133.984	133.234	118.469
Atp5g2	67942	chr15:102662868-102671047:-	123.465	120.894	127.052	120.311	90.9228	83.7337	110.397	76.903	108.747	112.416	85.4904	111.913
Gch1	14528	chr14:47153895-47189402:-	123.365	104.697	107.211	114.334	64.3956	34.3576	63.2926	36.4709	79.0912	66.2976	49.8545	93.0261
Atraid	381629	chr5:31048640-31054633:+	123.054	130.829	128.283	118.727	102.44	73.4582	116.722	83.7681	121.526	121.975	74.8673	113.168
Tnfrsf1a	21937	chr6:125349723-125362483:+	122.865	129.673	97.8453	120.607	129.14	102.855	142.953	93.1129	120.689	137.741	147.748	131.205
Ahsa1	217737	chr12:87266728-87273952:+	122.852	118.281	129.985	109.191	102.146	62.9631	119.49	60.4859	148.451	128.259	70.1048	146.6
Tmem86b	68255	chr7:4628040-4630482:-	122.515	118.343	130.675	119.336	96.6228	70.6371	108.299	72.9676	131.514	108.282	60.6749	129.2
Fam162a	70186	chr16:36043844-36071515:-	122.491	126.228	141.05	126.205	86.5705	70.0536	114.218	66.7797	122.66	122.861	98.8583	104.894
Mir5125	100628593	chr17:23823291-23823369:+	122.479	113.524	137.039	106.017	77.4347	81.1978	80.187	81.8514	116.669	95.6446	86.6859	102.467
Scarb1	20778	chr5:125277087-125341094:-	122.406	121.359	115.509	114.055	123.644	77.124	110.629	93.6017	119.136	123.673	79.5415	116.458
Hadha	97212	chr5:30118304-30154980:-	122.064	163.46	141.329	131.834	132.145	118.049	170.641	132.919	113.533	103.462	138.701	142.553
Psmc3	19182	chr2:91054016-91059438:+	122.029	125.288	135.47	117.316	97.3557	80.1295	111.883	71.896	121.557	122.485	97.3556	129.857
Acox2	93732	chr14:8225511-8259019:-	121.986	117.6	114.628	111.189	145.612	197.764	125.136	167.109	124.949	103.319	189.994	133.906
Rer1	67830	chr4:155074112-155086297:-	121.602	129.204	129.907	119.795	113.057	99.6257	122.078	94.8798	134.304	128.121	105.12	126.051
Hdgf	15191	chr3:87906321-87916132:+	120.963	132.863	135.047	138.36	81.7926	57.5868	101.16	63.0988	113.656	110.813	71.913	119.75
Tm9sf2	68059	chr14:122107082-122159603:+	120.496	125.877	114.353	129.2	118.939	106.476	115.36	117.748	123.625	116.641	134.678	144.007
Dpys	64705	chr15:39768485-39857470:-	120.442	147.128	153.646	115.764	96.773	12.9343	113.169	40.2165	126.191	99.5366	7.71727	121.047
Arl1	104303	chr10:88731414-88743202:+	120.438	130.781	127.828	140.037	104.849	114.026	102.112	109.859	116.402	102.286	141.445	141.559
Pdhb	68263	chr14:8165991-8172992:-	120.415	119.482	113.847	109.776	80.103	54.6056	96.5996	52.6193	106.256	89.229	65.8923	110.31
Tprkb	69786	chr6:85915719-85930284:+	120.359	113.191	123.778	119.057	58.7268	27.1616	64.0528	33.0762	78.5782	72.2306	37.7673	92.5798
Tmed9	67511	chr13:55593135-55597694:+	120.29	106.198	134.951	98.9934	151.803	216.284	123.318	178.022	155.715	171.251	211.506	127.479
Ube2l6	56791	chr2:84798828-84810003:+	119.783	138.432	119.395	123.808	90.6566	94.2056	116.796	90.2966	123.123	136.148	98.9381	123.664
Psma7	26444	chr2:180036367-180042464:-	119.699	116.518	127.269	111.236	94.4124	81.8197	108.514	65.7557	117.127	113.941	85.314	106.526
G0s2	14373	chr1:193272160-193273188:-	119.672	200.744	181.36	47.0133	56.7111	35.3997	112.773	73.9601	72.992	67.0413	24.9436	67.293
Rabac1	14470	chr7:24969750-24972728:-	119.582	137.612	150.63	126.998	103.097	100.323	127.535	99.7263	120.691	129.741	109.621	112.545
Atp6v1e1	11973	chr6:120795244-120822685:-	119.176	122.355	118.618	146.172	96.6057	87.5027	107.478	80.051	123.669	112.86	105.116	124.09
Bag1	12017	chr4:40936398-40948294:-	118.821	130.772	130.83	121.736	94.1732	69.0006	107.699	73.7675	110.713	115.21	78.9785	102.72
Wbp1l	226178	chr19:46599106-46657389:+	118.658	137.465	132.554	131.951	135.62	88.5608	166.765	87.8805	147.666	143.213	109.356	132.571
Tmem30a	69981	chr9:79768941-79793430:-	118.658	115.557	110.854	127.863	93.4842	79.5351	97.2265	83.2413	96.8823	80.7153	106.796	115.671
Slc22a18	18400	chr7:143473755-143499332:+	118.48	107.801	119.656	125.564	75.7901	28.1982	84.5573	38.3211	119.722	98.2809	16.8903	116.784
Acsm5	272428	chr7:119526265-119543360:+	118.366	119.219	106.984	106.998	61.1758	14.3311	53.0358	21.8325	69.9103	54.6732	9.53399	86.1542
Acbd5	74159	chr2:23068201-23114512:+	118.171	121.503	100.721	118.315	84.2682	57.4562	91.4976	74.0186	87.8666	68.3056	56.2958	112.199
Apol7a	75761	chr15:77388217-77399110:-	118.06	132.568	113.754	101.105	58.8381	14.1081	70.6601	28.1426	103.792	75.4267	6.58846	115.621
Coasy	71743	chr11:101082565-101086619:+	117.983	129.012	126.414	118.98	87.6207	56.1251	92.5383	60.2661	102.735	98.8975	54.1649	115.673
Sdc2	15529	chr15:32920723-33034721:+	117.887	112.926	107.399	129.887	122.309	59.1383	128.083	90.7683	137.671	110.141	67.7229	116.724
Eif3f	66085	chr7:108934415-108941942:+	117.811	109.69	120.873	118.562	88.4146	77.2195	102.835	77.3702	118.616	107.9	79.3787	105.189
Tmem19	67226	chr10:115340740-115362262:-	117.533	122.794	107.958	85.1764	85.4702	48.5915	99.2988	61.5964	117.886	99.5052	49.1215	123.411
Mmd	67468	chr11:90249476-90278573:+	117.429	145.536	119.593	88.519	116.425	69.567	146.441	88.5804	104.252	103.284	78.2125	124.221
Lman2	66890	chr13:55343833-55362783:-	117.212	127.126	125.826	109.228	119.368	101.912	109.904	111.761	120.128	119.131	89.9947	129.487
Pmpcb	73078	chr5:21737160-21757152:+	117.116	128.541	112.003	116.067	70.279	58.4093	90.514	56.2099	96.7917	85.987	59.6867	110.985
Coq8a	67426	chr1:180165238-180196020:-	117.11	93.6497	102.104	89.3632	67.5883	15.8915	90.378	27.4869	76.134	47.6401	7.70057	63.708
Gpld1	14756	chr13:24943152-24991936:+	117.058	103.401	102.323	112.701	88.062	47.1563	72.0239	60.1622	98.7055	78.5843	32.5636	117.286
Mia2	338320	chr12:59095800-59190220:+	116.6	134.555	109.333	122.813	94.9261	74.566	101.142	82.0142	109.266	89.0044	86.8924	137.976
Eif4b	75705	chr15:102073773-102097173:+	116.558	130.869	116.478	139.28	82.9512	50.873	109.246	55.3853	106.405	89.0053	60.1641	122.616
Mrpl14	68463	chr17:45686349-45698495:+	116.515	117.332	121.607	106.115	71.3243	37.1186	95.8936	42.734	94.2103	100.893	35.8008	101.281
Iyd	70337	chr10:3540279-3554877:+	116.26	118.193	102.874	126.188	83.0918	34.8168	90.8842	48.044	122.776	100.801	29.1327	131.493
Atp5l	27425	chr9:44913248-44920742:-	116.238	111.648	119.504	100.945	73.5081	65.239	100.756	68.862	100.714	102.144	69.4848	91.4466
Tram1	72265	chr1:13564693-13589910:-	115.963	102.502	121.885	106.914	119.036	153.758	97.5014	148.829	120.044	116.891	156.442	108.225
Kdelr1	68137	chr7:45872840-45883726:+	115.83	119.69	120.189	113.825	103.966	115.262	108.243	105.022	121.09	128.419	117.36	112.85
Epn1	13854	chr7:5080235-5098178:+	115.8	135.904	131.651	121.07	99.1869	67.9845	108.81	73.4794	119.364	112.706	67.3968	115.874
Hsd17b6	27400	chr10:127990936-128007508:-	115.62	113.404	137.619	156.38	97.3541	18.3032	99.611	63.0275	63.7062	123.997	4.99463	56.1377
Pisd-ps3	66776	chrUn_JH584304:52674-59689:-	115.51	91.6258	116.585	103.459	88.2336	63.9524	81.7552	64.3334	110.499	103.721	44.236	96.4438
Slc25a25	227731	chr2:32414487-32451470:-	115.501	127.668	39.8773	154.896	38.1229	47.8922	46.7057	34.579	98.4026	137.008	121.752	90.4201
Psmc4	23996	chr7:28041702-28050092:-	115.487	116.391	131.714	108.109	96.4333	76.4733	106.897	70.9099	125.204	121.62	98.9859	120.687
Npm1	18148	chr11:33152498-33163206:-	115.479	109.506	120.279	132.2	76.19	55.2355	98.3011	57.448	107.486	101.835	91.4512	113.751
Morf4l1	21761	chr9:90091669-90114820:-	115.403	121.828	119.886	128.612	97.0896	83.1909	108.637	85.194	114.136	98.5424	105.507	130.821
Cpt2	12896	chr4:107903982-107923589:-	115.191	144.392	150.74	108.55	98.6513	111.974	130.231	94.8579	103.493	107.333	99.8087	133.391
Ap2s1	232910	chr7:16738444-16749290:+	115.048	120.623	133.062	113.94	95.928	75.3161	106.189	68.7483	120.217	127.171	75.0898	110.785
Psmc5	19184	chr11:106256185-106263112:+	114.889	103.829	123.617	104.423	89.8036	67.1034	100.939	65.1877	115.481	119.541	92.7818	107.314
Acp5	11433	chr9:22126727-22135746:-	114.877	110.522	112.291	99.7594	69.124	39.3062	79.3096	45.279	113.628	104.842	46.588	105.864
Lipa	16889	chr19:34492316-34527474:-	114.618	136.37	117.559	122.195	105.856	59.0462	100.862	75.8096	99.8189	78.4264	49.7941	101.219
Nadk	192185	chr4:155562381-155591001:+	114.269	125.476	116.237	123.589	97.5593	52.5396	97.5905	62.5104	135.467	112.852	58.3575	135.077
Atf4	11911	chr15:80255184-80257545:+	113.876	111.256	107.027	112.837	116.199	101.663	110.127	92.4343	103.987	95.7516	139.643	75.2411
Ndufc2	68197	chr7:97400003-97407800:+	113.777	117.627	125.885	117.921	77.6466	65.8336	96.9312	60.2698	112.373	109.33	62.9794	104.079
Masp2	17175	chr4:148602544-148615480:+	113.571	110.72	99.1776	104.291	97.0711	61.1414	86.2005	76.3811	110.324	91.964	49.4115	126.884
Cnn3	71994	chr3:121426541-121458205:+	113.54	119.849	123.056	119.511	81.2681	45.5662	89.0811	58.1432	104.312	88.6338	51.8981	111.631
Fech	14151	chr18:64456542-64489098:-	113.211	122.982	108.228	122.901	79.9241	48.4347	85.2372	65.0804	90.5084	89.9209	51.0484	106.651
Atp6v1f	66144	chr6:29467783-29470509:+	112.569	110.901	129.056	113.533	83.0734	76.3123	101.278	75.0333	114.38	116.572	84.4789	92.7482
Txndc15	69672	chr13:55714650-55726228:+	112.559	122.256	118.388	112.419	95.8645	59.8223	108.572	71.6741	117.793	105.051	53.4943	117.008
St3gal4	20443	chr9:35046576-35116864:-	112.546	104.771	85.6932	91.0332	122.365	74.7045	113.484	87.2523	113.51	123.126	79.127	96.8311
Rab1a	19324	chr11:20201602-20226856:+	112.468	109.872	117.12	102.518	105.845	109.717	103.418	98.8327	120.239	108.665	114.959	119.082
Ddost	13200	chr4:138304738-138312611:+	112.349	103.689	122.249	102.296	126.759	179.852	109.031	163.228	107.26	115.325	163.797	96.1718
H1f0	14958	chr15:79028212-79030500:+	112.33	108.391	113.566	104.961	99.5413	106.825	94.0744	102.976	95.1918	101.337	124.159	98.7137
Nr1h3	22259	chr2:91184061-91195116:-	112.289	114.452	123.937	103.781	87.4623	63.0463	94.2207	72.7129	121.207	114.201	53.4071	112.326
Acss2	60525	chr2:155518043-155562743:+	112.232	95.0962	101.601	92.0524	48.3332	24.07	56.7766	28.2307	59.6378	38.5972	11.6216	65.3817
Habp2	226243	chr19:56287912-56320820:+	112.169	108.862	96.457	120.394	87.4994	60.5107	82.7318	79.0493	99.6792	104.352	58.7643	112.165
Mpnd	68047	chr17:56009201-56016783:+	111.979	116.833	113.883	111.905	90.4774	70.959	96.4962	71.4009	108.933	115.173	59.8877	103.962
Wbp2	22378	chr11:116078571-116086995:-	111.853	116.269	122.407	118.016	78.2982	57.862	93.8172	65.385	106.664	95.7411	82.1058	104.256
Ltbr	17000	chr6:125306571-125313885:-	111.78	125.687	110.709	115.015	126.415	113.769	119.651	103.569	133.635	134.523	113.132	128.628
Coq9	67914	chr8:94838417-94854895:+	111.779	132.042	124.695	116.239	87.8085	66.8825	108.483	66.1361	106.313	101.38	55.7484	109.708
Cebpb	12608	chr2:167688915-167690432:+	111.275	140.617	139.734	90.5493	131.992	154.009	89.4798	61.5643	168.426	220.752	193.437	275.868
Arpc3	56378	chr5:122391878-122406181:+	110.803	107.343	110.516	109.724	89.4726	82.338	101.641	79.0199	113.822	107.861	95.3005	105.973
Snora20	100303746	chr17:12922857-12922917:+	110.665	96.9011	68.1015	112.173	87.9205	58.294	66.9749	53.5601	106.406	62.4373	102.91	111.805
Psmc6	67089	chr14:45329824-45349071:+	110.592	98.8832	96.2244	101.501	78.5216	53.1402	86.3197	54.7922	91.219	80.5192	78.3102	104.371
Ganab	14376	chr19:8898057-8916742:+	110.547	108.953	102.903	107.222	110.126	102.2	99.0855	112.804	113.416	102.811	107.261	120.389
Sucla2	20916	chr14:73552786-73596142:+	110.517	115.909	104.715	115.454	67.3415	45.7772	90.1968	48.6923	92.958	80.4596	53.3323	106.283
Rhoa	11848	chr9:108306160-108337943:+	110.112	112.416	111.04	113.852	91.8207	71.7407	105.795	72.2525	113.766	105.645	88.4052	112.056
Mien1	103742	chr11:98437708-98438988:-	110.09	113.077	121.316	102.271	78.5618	73.1917	94.7698	70.3531	100.676	105.769	66.556	92.7818
Amacr	17117	chr15:10981756-10996624:+	109.932	130.746	117.598	114.35	74.2152	58.5142	95.4271	62.0127	87.5683	80.42	39.8242	117.355
Prkcsh	19089	chr9:22002988-22014245:+	109.818	110.91	125.192	106.076	109.32	115.195	116.957	116.591	125.529	115.013	116.762	114.06
Gm4951	240327	chr18:60212077-60247820:+	109.649	101.528	85.8325	112.52	80.6821	40.5759	81.3724	60.8172	89.8114	60.9895	33.6866	114.456
Psmd6	66413	chr14:14112185-14120904:-	109.442	98.7285	103.69	102.977	79.1114	56.1667	94.8544	55.7237	104.022	96.364	67.5077	110.609
BC031181	407819	chr18:75005900-75009933:+	109.394	110.138	109.653	96.9856	97.8058	92.2331	106.847	90.8846	114.068	103.557	76.6025	111.102
Rexo2	104444	chr9:48468514-48480611:-	109.387	105.601	124.954	86.8608	79.6908	96.4744	86.9499	73.4159	102.185	105.842	96.577	106.645
Urad	231903	chr5:147314984-147322440:-	109.181	98.9197	104.109	141.425	126.136	59.1655	100.917	66.1111	133.543	90.3811	63.4983	135.716
Dlst	78920	chr12:85110833-85134091:+	108.918	120.421	108.46	105.129	81.8155	76.049	102.758	69.3943	105.466	87.4943	69.5524	123.171
Arf4	11843	chr14:26638197-26657258:+	108.873	103.535	117.346	105.299	107.293	132.995	102.509	121.965	125.524	120.303	155.988	118.364
H3f3a	15078	chr1:180802560-180813605:-	108.78	112.987	107.86	107.415	85.844	62.8545	107.067	77.53	112.422	101.026	68.8392	104.237
Commd3	12238	chr2:18672462-18676216:+	108.721	109.664	105.166	107.617	78.9482	65.2131	97.4356	63.6621	105.207	97.619	69.9089	107.221
Atp6v0b	114143	chr4:117884330-117887329:-	108.669	113.066	111.729	116.626	97.4292	76.0246	113.562	77.4284	111.177	112.931	99.433	103.032
Eif4h	22384	chr5:134619872-134639409:-	108.149	125.573	123.689	116.966	95.5089	84.4854	106.864	77.8637	117.947	110.693	91.5992	119.633
Ndufa5	68202	chr6:24518664-24527687:-	108.086	115.138	118.117	104.514	69.199	55.6781	98.8897	52.6245	105.43	96.7722	55.6899	93.8159
Acat3	224530	chr17:12923959-12940396:-	108.083	101.12	99.6771	106.594	76.7283	54.5607	83.2315	55.7245	93.1067	79.3256	65.8369	93.1919
Zfand6	65098	chr7:84615054-84679351:-	108.031	118.448	118.178	94.7231	86.4527	65.9815	109.195	68.3123	92.585	90.7374	68.072	97.7233
Dctn2	69654	chr10:127266262-127281959:+	107.932	116.155	116.337	108.23	86.3676	70.5211	94.4791	68.6317	103.548	100.427	82.8943	104.599
4931406C07Rik	70984	chr9:15283337-15306448:-	107.842	117.127	118.262	72.2408	62.1115	35.0141	83.4159	38.8165	92.6689	75.9172	36.1674	106.588
Sdf2l1	64136	chr16:17130138-17132383:-	107.839	87.3805	106.116	70.0562	141.77	325.715	86.1324	256.107	65.7861	109.721	207.37	63.049
Tmem50a	71817	chr4:134897849-134914916:-	107.514	113.723	109.517	120.669	85.4431	54.2653	102.991	56.5767	114.595	106.886	61.6023	107.764
Ubc	22190	chr5:125385965-125390017:-	107.495	86.9098	146.351	114.664	61.3008	44.3884	73.1454	54.922	94.8273	68.3947	37.7186	70.9655
Ost4	67695	chr5:30906516-30907788:-	107.186	118.925	133.74	111.275	112.364	135.859	124.679	116.912	117.765	121.04	149.296	101.525
Psma5	26442	chr3:108256926-108279952:+	107.055	101.746	107.524	97.7865	79.0136	54.771	92.2232	50.5042	93.4411	87.0725	80.5109	97.2587
Spcs1	69019	chr14:30999826-31001666:-	106.62	116.653	115.123	110.678	107.873	149.914	121.651	133.493	110.459	115.838	159.013	107.33
Nme1	18102	chr11:93958925-93968521:-	106.345	95.4354	113.245	89.4467	106.802	116.64	113.701	102.292	111.105	104.804	114.634	93.7251
Hes6	55927	chr1:91411483-91413222:-	106.301	106.455	125.837	70.4453	45.1009	23.3981	51.6465	27.7362	87.8073	70.2652	16.7703	86.5135
Iqgap2	544963	chr13:95627177-95891922:-	106.278	111.343	84.2321	108.979	91.4008	67.0541	92.1662	77.8672	95.3647	78.4404	85.888	123.845
Gpat4	102247	chr8:23172946-23208453:-	106.253	105.26	103.127	141.015	58.1007	36.8598	67.1802	44.1462	92.967	73.0808	45.8019	90.5182
Cald1	109624	chr6:34598504-34775469:+	106.251	112.607	94.8285	121.467	116.029	104.079	98.2482	103.244	103.825	88.7093	130.887	122.609
Stbd1	52331	chr5:92603051-92606579:+	105.841	138.546	105.274	112.763	90.1316	47.4897	107.372	61.7223	119.449	128.029	52.7226	125.745
Furin	18550	chr7:80389194-80405436:-	105.74	112.381	104.249	107.994	113.658	94.8337	105.691	99.5621	117.544	103.717	78.2764	123.214
Ndufs8	225887	chr19:3908863-3912774:-	105.389	106.28	118.653	103.512	66.7864	50.6468	82.9135	47.9179	101.754	102.164	49.2417	97.4398
Pabpn1	54196	chr14:54894143-54898927:+	105.336	92.8758	102.505	90.4305	79.8967	53.4306	79.1354	63.6244	90.2477	80.7193	63.118	72.1644
Gstm6	14867	chr3:107938848-107943749:-	105.087	86.5201	93.3207	102.591	40.4811	15.9179	54.7104	19.9707	74.035	57.8042	12.9562	63.02
Mup12	100039054	chr4:60737381-60741281:-	105.077	55.7464	116.689	12.2128	64.5339	44.2192	58.121	41.78	63.9518	40.9767	51.9525	99.1099
C1rl	232371	chr6:124493113-124510643:+	105.059	106.416	96.0236	98.7332	100.211	89.7149	102.194	101.421	100.466	97.2272	82.3282	108.992
Snrpd3	67332	chr10:75518042-75535440:+	105.059	105.288	122.133	102.231	76.5847	53.3321	91.2003	52.7398	111.546	104.452	60.615	90.8601
Tspan4	64540	chr7:141475236-141493427:+	105.028	124.55	103.058	126.961	76.5356	31.8625	85.1669	36.6142	120.507	131.592	53.1316	134.669
Afmid	71562	chr11:117825919-117839908:+	105.016	84.4324	87.6658	102.909	59.7231	9.26866	68.8956	18.3883	94.7726	56.6623	3.6143	86.3159
Aco1	11428	chr4:40143265-40199009:+	104.686	112.673	112.783	105.552	73.7875	39.3904	77.5024	48.4767	92.5144	72.9795	36.1739	110.876
Nr1h4	20186	chr10:89454234-89533622:-	104.208	114.565	98.3406	95.2113	96.2079	59.9509	103.167	75.338	100.856	87.7087	47.782	102.146
Ift20	55978	chr11:78536436-78541473:+	104.093	102.294	102.732	92.281	90.6432	111.628	86.8286	96.0731	94.7713	101.797	105.532	90.7609
Mrpl18	67681	chr17:12911355-12916091:-	104.024	106.43	100.813	96.4668	78.032	62.3083	86.6865	53.5159	111.27	94.2913	69.5786	95.044
Rdx	19684	chr9:52047150-52088738:+	103.99	105.733	81.3492	105.344	69.4087	37.1229	73.1982	47.5281	83.46	63.0542	41.0156	98.5576
Nlrp6	101613	chr7:140920902-140929192:+	103.937	97.7779	97.762	91.7486	97.4005	74.4396	94.9644	91.22	123.157	106.381	52.5477	117.837
Rpl15	66480	chr14:18267823-18270986:-	103.852	99.1454	111.662	96.3685	79.9529	76.9958	95.0497	74.2403	102.702	98.4019	90.4441	91.9563
Cct2	12461	chr10:117050998-117063814:-	103.717	99.2641	108.401	104.961	80.4464	60.3779	91.3637	58.4562	107.385	92.8342	83.7475	116.271
9530068E07Rik	213673	chr11:52396428-52408723:+	103.647	112.571	106.724	114.429	82.4575	64.6369	96.1252	62.9893	99.9263	89.4437	79.167	108.799
Cyp51	13121	chr5:4080674-4104697:-	103.369	124.307	123.687	94.3405	130.319	136.581	127.568	110.394	88.914	55.1645	106.857	88.0314
Mpst	246221	chr15:78406712-78414015:+	103.294	106.6	123.197	86.4269	76.2562	41.1382	90.1193	53.3973	107.34	101.469	31.9577	114.747
Rab1b	76308	chr19:5099207-5106996:-	103.252	122.046	118.613	107.274	90.7406	67.2164	102.39	72.48	113.225	113.688	64.8312	113.411
Hsbp1	68196	chr8:119344538-119348929:+	103.142	112.061	118.105	93.7874	78.2605	62.7817	103.59	64.093	108.978	106.145	63.7943	96.2381
Psmd3	22123	chr11:98682554-98695978:+	103.06	99.2313	107.034	91.0474	86.3362	62.807	98.2652	54.7825	99.8854	95.7648	78.0852	108.568
Ces1b	382044	chr8:93056727-93080017:-	102.833	100.435	105.288	153.58	37.3791	12.3126	45.6939	21.0606	74.0902	56.3032	24.8424	76.0979
Slc25a22	68267	chr7:141429749-141437874:-	102.805	108.881	98.2535	127.427	76.9971	102.484	98.9064	97.8985	91.9446	96.6471	109.039	93.1282
Cct5	12465	chr15:31590800-31601846:-	102.576	104.302	108.15	112.381	81.7366	59.4928	88.7738	61.3327	106.931	88.6462	72.9997	108.443
Idh2	269951	chr7:80094847-80115350:-	102.55	111.284	105.286	96.4233	76.9801	50.3882	117.835	55.3086	85.6915	76.3006	39.5139	78.9438
Rnf10	50849	chr5:115241770-115272895:-	102.047	113.201	109.982	107.636	101.904	94.5026	112.675	83.6239	113.374	100.951	105.568	109.492
Srsf2	20382	chr11:116849897-116853094:-	102.006	99.5569	101.078	110.546	91.8357	68.4052	95.4025	75.291	122.209	113.273	87.0591	107.951
Lpgat1	226856	chr1:191718024-191784257:+	101.965	133.831	82.386	88.8629	133.382	98.5836	129.84	120.008	127.791	139.362	130.763	194.841
Fpgs	14287	chr2:32682609-32694175:-	101.821	102.904	100.908	76.366	109.868	114.862	115.196	93.8125	105.808	102.719	97.0115	108.072
Ndufb3	66495	chr1:58586397-58595964:+	101.609	102.049	107.757	79.1185	72.7936	65.7267	97.8676	63.3467	91.3896	89.3606	57.3023	90.0848
Cct3	12462	chr3:88297135-88321766:+	101.567	94.9871	107.198	94.5164	81.4013	68.1566	90.5885	64.1009	111.275	98.5332	91.9471	109.337
Selenos	109815	chr7:66079649-66089405:+	101.505	92.0143	103.029	116.032	115.052	137.277	98.5434	118.167	120.504	122.005	154.257	102.767
Stard5	170460	chr7:83632017-83642328:+	101.267	107.398	112.102	98.1269	85.8899	43.5597	83.6307	57.9052	98.338	89.7008	37.1283	117.622
Pid1	98496	chr1:84036293-84284645:-	101.218	87.2587	77.9994	74.0549	121.331	138.873	105.354	119.415	97.568	86.3294	104.735	100.592
Psmd11	69077	chr11:80428615-80472133:+	101.214	91.5933	93.0231	90.2294	86.0589	58.9236	92.572	56.4287	85.6122	69.2192	73.0636	89.9225
Zfp36l1	12192	chr12:80107760-80113013:-	101.123	73.2758	102.091	98.9147	94.1477	53.4147	79.3016	66.4464	91.0748	51.2193	90.8866	91.5718
Ptges3	56351	chr10:128058982-128077254:+	101.109	101.913	107.556	104.831	80.2397	47.0299	94.9093	46.9564	105.034	101.42	67.3532	100.991
Ube2d3	66105	chr3:135438232-135468214:+	101.031	99.1022	91.3501	102.008	75.1337	57.413	85.326	61.3101	97.7551	86.107	82.9539	102.309
Rnh1	107702	chr7:141160326-141172851:-	100.952	107.249	103.207	96.7402	78.0185	70.2779	83.8804	63.2017	99.5676	94.7825	77.3182	99.7053
Mrpl30	107734	chr1:37890477-37898338:+	100.948	103.035	120.504	94.3071	74.7354	68.2792	86.0405	61.0125	99.7993	103.047	68.1793	88.2607
Dhrs3	20148	chr4:144892827-144928209:+	100.746	95.4448	112.324	87.9123	73.487	26.7691	85.4644	38.6306	89.1973	84.085	20.4838	90.9571
Slc3a1	20532	chr17:85028347-85064241:+	100.746	100.498	68.5675	161.467	162.909	90.3844	107.083	123.966	130.66	103.885	71.0567	152.034
Chpt1	212862	chr10:88472813-88503970:-	100.668	135.66	100.641	94.7811	94.6826	61.5478	125.291	94.5061	90.7105	82.6994	56.6525	113.725
Trp53inp2	68728	chr2:155381856-155389847:+	100.498	127.987	108.349	88.1082	166.246	162.312	155.449	174.629	148.541	134.697	127.02	177.9
Bola3	78653	chr6:83349484-83358392:+	100.481	104.701	110.208	89.6507	75.2612	56.8318	93.8003	56.636	108.138	95.043	49.6137	104.629
Decr1	67460	chr4:15917240-15945507:-	100.406	149.133	128.82	83.0082	98.8655	83.8859	150.371	101.857	88.554	97.0345	99.9031	114.489
Hadhb	231086	chr5:30155253-30184593:+	100.165	125.218	109.929	105.682	100.236	90.0534	137.668	95.4563	85.4588	79.8445	93.4247	111.597
Rnf187	108660	chr11:58932288-58938906:-	100.151	121.255	117.412	103.835	92.2051	75.8372	93.6548	70.4881	105.244	109.808	73.0814	110.385
Mocs2	17434	chr13:114818237-114829420:+	100.101	93.8476	100.195	94.9051	81.692	48.9066	89.3782	53.1123	97.3096	81.9829	55.4717	91.4755
Psmc2	19181	chr5:21785283-21803784:+	100.051	90.5324	99.4997	91.7566	77.5213	62.6814	88.6656	55.4611	94.5564	86.2506	79.7172	100.795
Hsp90aa1	15519	chr12:110691036-110696395:-	100.009	89.9518	81.9575	78.2887	89.6652	46.0425	88.8607	46.6431	140.086	88.3518	85.1787	137.162
Ndufa12	66414	chr10:94199009-94220948:+	100.009	90.9226	95.3671	86.258	67.8161	51.5785	79.6981	46.8332	92.4439	83.878	49.2979	79.5321
Mttp	17777	chr3:138089855-138143418:-	99.8459	117.161	104.829	93.9184	121.658	83.335	118.922	110.344	102.387	88.0083	80.1134	126.688
Mir703	735265	chr5:98475556-98475664:-	99.7794	97.2383	98.7443	101.446	58.8132	49.8944	86.7546	61.1969	97.6588	107.644	58.8	79.5279
Gnb2	14693	chr5:137528129-137533229:-	99.6917	104.724	115.268	103.615	82.6036	82.1923	94.0496	79.1585	95.9823	102.838	104.36	88.0709
Nags	217214	chr11:102145513-102149528:+	99.6896	84.8795	90.1429	81.3475	78.5494	47.4718	66.8486	57.7354	86.5739	72.4674	61.9562	84.8953
Myl12b	67938	chr17:70973963-70990516:-	99.6893	101.208	108.859	104.118	84.7363	78.4119	99.7278	73.5025	111.704	101.991	74.8474	100.462
Man1a	17155	chr10:53906033-54075796:-	99.5395	111.649	87.3974	121.629	85.3722	72.1984	89.4594	83.9229	100.791	86.293	78.5186	124.119
Ccni	12453	chr5:93181933-93206495:-	99.4827	99.8415	95.8276	104.074	95.9626	88.4483	102.597	87.8983	93.9815	85.3101	99.6173	97.1319
Tcp1	21454	chr17:12916329-12925067:+	99.4385	100.792	97.1966	115.659	76.2375	51.1422	83.8178	59.5134	100.699	82.202	70.6524	107.125
Pdia5	72599	chr16:35397312-35490873:-	99.3039	107.04	91.1602	104.216	99.5492	87.7623	87.8751	84.5086	105.237	111.179	103.789	126.598
Agpat3	28169	chr10:78271563-78351700:-	99.3036	122.613	111.206	93.0862	116.378	95.8176	122.175	102.406	106.619	104.551	85.691	117.73
Ppp2ca	19052	chr11:52098824-52122749:+	99.1797	106.375	101.327	96.5478	89.5523	73.8426	95.9706	70.6052	99.2444	86.8299	88.2067	101.454
Rnf5	54197	chr17:34601099-34603561:-	99.1231	103.394	105.018	94.665	68.691	52.7523	78.7583	57.3089	92.0258	93.1218	49.9192	91.5275
Hist1h1c	50708	chr13:23738807-23739531:+	99.1121	94.0413	95.4118	71.2761	106.569	94.2479	112.576	99.5171	126.86	102.525	89.856	132.138
Manf	74840	chr9:106887415-106891938:-	98.7394	69.8748	104.029	69.1827	148.415	250.735	89.1656	203.858	111.425	146.558	225.105	84.8894
Entpd5	12499	chr12:84373876-84409029:-	98.6198	117.513	95.8518	79.7061	74.4964	30.1781	83.1266	35.2398	77.5666	64.359	29.949	100.506
Trir	68544	chr8:85026833-85030286:+	98.4672	93.4586	108.244	94.2006	97.4683	82.6998	96.3369	76.2308	115.553	109.5	88.9784	96.8237
Ergic3	66366	chr2:156008028-156018279:+	98.2392	102.092	101.36	94.559	77.8387	57.4113	84.6026	63.1053	91.6982	88.7661	52.9737	86.8319
Rad23b	19359	chr4:55350042-55392237:+	98.0144	92.4867	94.785	94.7009	86.4269	65.0589	86.9541	63.9759	100.861	82.7237	73.0876	103.963
1600014C10Rik	72244	chr7:38183217-38197565:+	97.9869	121.513	112.694	101.342	105.466	63.5804	101.601	81.6397	100.127	97.131	42.6135	117.465
Aco2	11429	chr15:81872463-81915137:+	97.9042	102.944	104.441	98.5253	83.224	65.0138	133.799	68.7545	100.574	82.8021	62.8347	107.169
Slc35b1	110172	chr11:95384922-95391652:+	97.7845	94.3722	107.47	69.8189	114.444	168.078	87.9993	146.787	102.941	109.46	167.371	89.2023
Gas6	14456	chr8:13465374-13494535:-	97.7139	145.618	69.5933	82.5015	88.6953	38.3443	107.44	48.536	126.811	190.545	124.789	105.282
Bdh1	71911	chr16:31422297-31458901:+	97.6908	129.066	111.608	68.0604	51.7805	40.3116	86.3681	49.5229	72.6776	87.123	31.4126	97.55
Srp9	27058	chr1:182124737-182132415:+	97.595	94.7911	114.638	94.2186	87.6632	102.326	97.2652	93.6152	101.991	105.467	102.599	87.7104
Urod	22275	chr4:116989965-116994413:-	97.5237	104.309	103.607	85.2175	66.9156	54.6462	80.3091	55.5864	87.0518	83.2134	52.8611	85.4851
Psma3	19167	chr12:70974623-70995877:+	97.3084	91.1822	91.3162	93.3422	69.4017	51.29	80.9927	49.2187	90.2965	87.7392	64.5482	87.3691
Stra6l	74152	chr4:45848816-45887010:+	97.2713	85.6162	76.0877	96.3712	88.1487	82.6661	81.1775	78.4794	99.6712	85.4649	86.8642	94.3959
Ss18l2	26901	chr9:121710389-121712921:+	97.2039	84.1721	107.136	83.6463	85.339	72.6912	87.4576	72.9372	109.853	98.1458	67.3339	83.7117
Perp	64058	chr10:18845071-18857072:+	97.1928	127.445	101.834	84.3006	88.32	58.8986	114.446	69.3914	96.917	100.034	56.2364	110.068
Hyou1	12282	chr9:44379490-44392369:+	97.1599	78.286	106.783	78.8997	153.767	226.761	83.2323	202.002	109.751	122.32	202.526	99.0461
Taf10	24075	chr7:105742894-105744338:-	97.1023	114.03	126.882	103.479	92.3784	99.106	84.5315	78.586	105.378	119.452	113.371	100.787
Chchd3	66075	chr6:32792207-33060260:-	97.0085	103.337	104.544	98.3941	71.6949	58.4798	95.3349	53.3723	90.3758	83.8182	55.8558	91.4203
Ndufa7	66416	chr17:33824572-33838316:+	96.8653	99.9615	105.393	89.1074	74.6239	66.4731	91.6936	60.1315	94.5778	98.002	53.0731	78.7055
Rps20	67427	chr4:3831584-3835655:-	96.7946	93.7951	107.51	94.2632	92.7603	80.974	102.985	84.5787	108.926	117.352	94.791	82.7908
Selenot	69227	chr3:58576636-58593546:+	96.6892	94.8906	84.7693	91.8784	76.6164	70.9547	88.5937	79.6391	92.4158	80.7713	85.7683	99.4476
Atp11c	320940	chrX:60223290-60403981:-	96.6142	95.2308	69.3333	83.3648	82.8846	37.197	81.3096	57.7441	82.0922	64.5693	38.9403	92.3782
Pla2g12b	69836	chr10:59403685-59421976:+	96.6079	92.8309	96.5391	87.3488	100.779	117.537	107.311	107.399	98.7006	101.078	111.847	88.1348
Eif3g	53356	chr9:20894349-20898590:-	96.5675	95.329	108.676	98.3589	71.9904	66.003	85.404	62.3938	98.3335	101.463	84.8789	94.0572
Sra1	24068	chr18:36667187-36670311:-	96.5547	94.2208	112.467	97.812	87.2876	78.8464	94.7481	71.2419	108.674	120.275	73.2983	99.2536
Ccnl2	56036	chr4:155812489-155824543:+	96.3844	91.4381	92.171	81.2592	90.0962	84.6284	86.8269	83.9536	94.3842	93.5793	94.5205	85.7687
Map2k2	26396	chr10:81105915-81124697:+	96.2143	107.443	113.977	98.4421	88.0676	95.9034	95.9692	82.981	97.6175	100.127	99.5157	96.9473
Rac1	19353	chr5:143505481-143528031:-	96.0427	106.138	105.969	104.271	83.941	67.6006	101.129	65.1867	105.461	101.214	79.8866	109.198
Stat3	20848	chr11:100886806-100939540:-	95.8823	100.301	75.475	111.213	108.689	92.6931	105.904	95.1267	95.0922	82.5911	132.822	115.958
Adrm1	56436	chr2:180171588-180176283:+	95.8447	86.6869	102.496	78.1462	72.6866	50.8904	81.9143	46.3934	88.8445	80.3021	71.7922	84.1234
Cct6a	12466	chr5:129787356-129846443:+	95.5634	94.0503	99.7625	92.7389	78.4918	50.9684	87.072	52.0135	106.973	89.5846	69.7404	116.087
Ostc	66357	chr3:130695917-130709444:-	95.2767	90.9254	107.63	92.4715	128.224	165.119	104.43	157.026	121.136	122.803	156.001	106.772
G6pc	14377	chr11:101367716-101377903:+	95.2275	177.547	87.9074	126.153	35.7417	28.9515	56.1457	31.2459	138.664	117.503	45.9196	148.64
Dld	13382	chr12:31331562-31351471:-	95.1994	103.793	91.9394	101.957	65.03	63.9674	76.6682	60.802	83.0085	73.6246	71.9498	97.3305
Derl1	67819	chr15:57869502-57892418:-	95.1355	96.5827	99.0866	91.0488	98.5473	106.548	97.1358	95.9416	95.5552	101.804	113.313	97.1391
Lipc	15450	chr9:70798128-70952221:-	95.1347	99.4844	99.5136	71.9874	27.9397	7.37787	39.6465	11.0956	64.2577	69.5995	11.6338	72.094
Mpc1	55951	chr17:8283813-8297661:+	95.1021	92.9242	106.384	80.4513	75.5302	43.2029	81.8379	46.3779	91.314	82.1553	37.3646	85.9461
Nr2f6	13864	chr8:71374119-71381952:-	94.9926	110.184	103.267	103.78	105.826	69.6613	98.3276	72.9453	103.828	101.978	60.4447	109.489
Scarb2	12492	chr5:92441311-92505657:-	94.9458	118.287	95.4867	110.421	87.2605	67.7156	107.123	77.2933	99.774	93.2839	77.5409	120.431
Rab2a	59021	chr4:8535644-8607702:+	94.843	98.2222	94.1839	88.6176	77.6681	80.6727	87.836	72.5662	95.8623	92.1304	85.1936	94.9427
C1qbp	12261	chr11:70977846-70983026:-	94.8367	91.1971	99.7352	91.579	60.206	56.4976	69.5851	47.7338	85.1318	79.833	56.0697	91.8064
Erp29	67397	chr5:121444753-121452474:-	94.7991	95.764	109.427	84.2028	105.069	115.272	98.6403	111.654	88.4579	97.1122	108.14	72.4566
Lonp1	74142	chr17:56614298-56626903:-	94.7318	107.995	97.9362	99.2751	61.1401	47.0627	69.1038	47.0678	78.7161	75.5555	54.5255	87.4642
Ssr2	66256	chr3:88579608-88588420:+	94.7299	91.8638	110.112	89.3716	105.705	149.532	92.3408	131.447	118.821	124.238	152.474	95.7815
Cmpk1	66588	chr4:114960613-114987228:-	94.7158	101.154	98.2971	95.272	71.5413	67.5361	86.6807	67.2694	94.4955	85.1855	82.2632	91.9473
Mrps21	66292	chr3:95862634-95871514:-	94.5671	93.3206	105.151	94.6691	70.4078	54.2755	87.5779	57.7893	97.8702	98.168	55.3467	88.8601
Snord104	100216537	chr11:106500991-106501063:+	94.5289	105.403	117.262	83.2358	75.1897	59.2178	74.83	76.4576	103.141	119.494	66.75	82.0752
Ctdsp1	227292	chr1:74391609-74397285:+	94.5148	103.62	96.4314	112.479	84.418	53.9006	85.5742	68.3847	95.3737	90.8398	55.9802	100.247
Cib1	23991	chr7:80227156-80232805:-	94.45	97.2628	105.78	91.0396	79.7313	61.8718	86.683	55.444	102.465	102.404	60.6909	89.1112
Mrps34	79044	chr17:24895120-24896273:+	94.3847	92.4937	104.226	83.1473	78.2935	70.3454	87.7699	64.1245	105.818	103.022	56.8531	87.3043
Arcn1	213827	chr9:44742144-44767808:-	94.3715	93.0935	93.0744	95.9665	95.4292	113.516	82.1226	105.714	102.65	88.1715	128.481	108.163
Suox	211389	chr10:128669887-128673918:-	94.3569	103.692	98.5265	103.189	57.5607	34.0755	74.5722	47.2028	87.0682	78.7427	30.6487	111.551
Eif3e	16341	chr15:43250040-43282736:-	94.3302	88.3226	90.6353	94.9169	66.5336	49.8612	79.7439	48.4103	95.1498	80.9237	59.8514	93.7683
Aadat	23923	chr8:60506124-60545677:+	94.306	86.9125	95.8279	79.8352	63.179	33.4911	63.2084	37.551	70.1219	57.3924	38.5223	102.448
Cct8	12469	chr16:87483325-87495869:-	94.1739	92.0459	92.3733	102.544	85.5691	48.7574	85.0311	57.5045	100.985	81.1619	59.4495	107.458
Tmem258	69038	chr19:10204202-10207824:+	94.1259	91.2224	109.717	79.1056	91.0289	135.894	84.6976	106.904	97.9974	112.14	121.625	72.1129
Ccdc107	622404	chr4:43493365-43495921:+	94.0807	111.616	105.471	73.3686	58.2683	39.4019	70.7736	43.3147	86.3571	89.7304	37.4271	78.0689
Hpgd	15446	chr8:56294552-56321046:+	94.031	101.439	94.2487	80.1525	52.8437	17.5629	80.0051	27.0046	83.6735	53.6041	11.8238	72.1933
Gnas	14683	chr2:174284320-174346742:+	93.9441	95.3589	97.1673	80.071	74.4358	73.8542	92.3251	70.3484	93.9334	85.9843	77.0899	86.8059
Anxa6	11749	chr11:54978953-55033471:-	93.9408	95.6343	93.5648	94.7813	67.1649	40.8944	81.4583	52.0819	81.2436	76.2932	39.4101	92.3145
Cluh	74148	chr11:74649495-74670847:+	93.8451	101.526	94.3143	103.236	97.4657	60.2193	92.9221	74.4956	89.4445	75.1864	48.5007	104.103
Ppdpf	66496	chr2:181186822-181188504:+	93.7207	104.926	115.478	75.3644	73.1354	48.0664	86.6107	57.0172	98.3367	98.67	44.1626	86.3482
Grb7	14786	chr11:98446834-98455373:+	93.7191	81.2925	90.4877	89.613	65.4627	32.9859	62.7567	46.3996	70.9459	49.3595	29.2474	77.9124
Nudt4	71207	chr10:95547007-95564167:-	93.6712	100.778	92.3192	92.7762	81.7632	64.1135	90.2028	61.1561	98.0542	93.6379	103.259	99.7418
Hnrnpab	15384	chr11:51600100-51606881:-	93.6625	91.762	98.6797	90.7039	74.9583	71.8337	75.6111	57.6621	97.1953	88.0541	97.6119	89.6357
Tma7	66167	chr9:109077988-109082381:-	93.6111	95.7536	98.5141	81.2087	74.3274	85.705	89.5743	81.957	100.673	101.259	76.3574	82.3507
Slc25a20	57279	chr9:108662098-108684641:+	93.4743	135.608	120.907	83.9377	109.79	86.9695	153.752	92.1543	99.3451	108.046	83.4148	121.509
Slc26a1	231583	chr5:108669881-108675365:-	93.4566	99.6523	84.5654	100.533	75.0584	38.2633	66.8909	48.8683	91.5002	74.915	38.1009	102.39
Jtb	23922	chr3:90231597-90235840:+	93.4352	105.84	103.915	96.0319	78.0632	65.1097	86.8974	64.3016	96.2136	99.9147	70.8825	90.0324
Inhbc	16325	chr10:127356322-127370548:-	93.3027	102.687	106.231	84.1056	126.907	92.1658	117.966	108.747	100.383	101.254	87.3752	90.8672
Mtch2	56428	chr2:90847155-90866810:+	93.2836	90.5168	92.6181	96.37	69.7905	52.471	81.5245	54.4116	88.9381	77.6059	58.2606	86.5669
Serinc3	26943	chr2:163623273-163645143:-	93.2405	105.21	98.2983	115.29	140.784	183.069	146.411	180.189	133.452	116.608	182.535	128.117
Anp32a	11737	chr9:62341343-62378805:+	93.0412	84.8628	85.989	81.797	65.8937	31.2626	73.1131	40.7355	76.2941	68.5658	24.3835	70.686
Dhdh	71755	chr7:45473563-45488796:-	92.9227	99.6427	81.2411	87.3691	61.6558	23.8101	65.8216	38.6569	73.0623	56.0007	13.58	87.6008
Scly	50880	chr1:91298338-91321080:+	92.8491	95.7948	99.4186	79.5935	76.3951	65.4593	75.9176	69.0837	92.582	94.1355	61.2035	89.6162
Mrpl27	94064	chr11:94653791-94660087:+	92.7821	99.2607	107.174	87.96	71.2293	58.0717	83.0047	57.9959	90.6925	99.719	52.498	90.894
Coa3	52469	chr11:101277970-101278948:-	92.6613	89.3515	105.108	85.0081	74.8124	57.5856	82.9215	58.6808	91.2139	100.444	54.7204	81.1389
Nit1	27045	chr1:171342237-171345645:-	92.53	83.6297	83.694	88.2065	76.4805	56.023	79.5471	65.1432	85.4094	73.9041	51.3109	100.573
Gm10319	381806	chr6:122136628-122150958:+	92.5081	79.0394	70.4021	74.3662	92.2102	51.6992	64.6738	64.7383	73.3694	51.4649	43.6385	84.8913
Ndufv2	72900	chr17:66078795-66101559:-	92.3722	95.7188	98.393	96.3061	63.9372	50.4297	81.3768	50.3946	85.4462	78.8049	51.3	86.7898
Emc7	73024	chr2:112455025-112467436:+	92.3589	93.9275	93.3566	91.1493	76.373	72.3259	82.9015	73.2725	97.3611	92.8903	80.0167	91.7441
Kdelr2	66913	chr5:143403820-143421904:+	92.2784	84.3676	103.327	91.3133	102.099	130.78	85.6795	117.736	121.254	116.186	153.123	110.321
Entpd8	72090	chr2:25080323-25085719:+	92.2457	88.8316	90.2373	70.0044	67.3374	34.4388	64.1981	52.5105	76.5603	82.795	16.4287	89.0304
Tmem183a	57439	chr1:134346097-134361999:-	92.1428	93.6643	93.9665	107.011	64.4691	40.7256	71.9923	46.2866	84.7544	86.456	42.7766	91.3751
Bola2	66162	chr7:126696000-126696693:+	91.922	88.1535	101.231	84.9536	93.4971	111.724	108.29	95.7367	100.346	108.825	113.98	78.6811
Snrpd2	107686	chr7:19149838-19152726:+	91.9138	84.2664	98.7987	85.9249	70.4051	64.7235	81.5551	61.7894	84.1934	88.6207	66.1178	78.1067
Mrpl42	67270	chr10:95480806-95501927:-	91.9	91.3547	103.77	91.3988	69.9585	53.7065	88.2931	51.9182	92.5856	88.0869	48.3149	86.0384
Acot13	66834	chr13:24817955-24831489:-	91.8448	88.9884	96.5237	94.4795	54.2985	29.272	63.436	34.926	75.2207	61.878	28.2205	68.8496
Ehhadh	74147	chr16:21761285-21787834:-	91.7772	87.7267	104.074	97.2783	95.3251	37.526	140.503	59.9252	64.3467	55.675	40.0484	92.242
Mug-ps1	17835	chr6:122176053-122248566:+	91.6961	74.6994	75.8721	95.2789	67.2648	56.0414	52.305	67.8915	86.3491	62.2829	65.1964	74.0426
BC005537	79555	chr13:24801657-24812899:+	91.678	102.632	92.7973	106.263	79.9394	57.6434	81.6773	62.4627	96.1525	66.4872	68.9885	95.6464
Psmd12	66997	chr11:107479528-107498036:+	91.636	78.8157	86.8333	84.2237	70.8378	50.7858	80.6719	46.4966	84.7224	73.9801	69.9626	88.3767
Psmd7	17463	chr8:107580380-107588482:-	91.5549	83.0911	91.7777	82.4873	81.6257	60.1807	92.8124	57.0478	86.3268	73.4476	73.5028	80.3115
Rnf181	66510	chr6:72359712-72366972:-	91.5383	86.9015	102.637	82.6336	81.8791	79.0056	77.8342	77.4608	99.0785	79.5611	64.1116	83.7686
Timm13	30055	chr10:80899450-80900969:-	91.2937	94.5505	109.854	81.5971	73.0934	57.0316	86.6745	56.2308	94.6323	98.0377	55.8319	85.2285
Lasp1	16796	chr11:97799672-97838764:+	91.262	85.0662	86.2821	88.8479	92.3915	70.821	76.6584	82.6586	96.879	75.7455	56.8137	99.4986
Papss2	23972	chr19:32595715-32667187:+	91.1895	69.3203	82.1102	71.757	28.6211	14.3269	32.6021	14.0041	39.7207	31.9612	10.327	54.8903
Rab14	68365	chr2:35180205-35201120:-	91.0499	90.7164	86.252	94.2726	72.7157	54.9692	82.1984	56.6443	82.9829	70.6019	56.6223	93.3229
Gpi1	14751	chr7:34201327-34230336:-	91.0108	89.7874	98.5885	99.2044	67.7041	42.2403	86.9269	44.6307	88.0196	73.6865	72.1811	86.3251
Eif3m	98221	chr2:104999657-105017027:-	90.8745	93.9111	102.582	94.2484	69.8554	64.6183	82.7694	58.6508	97.2819	87.072	79.4033	98.591
Dcxr	67880	chr11:120724546-120727284:-	90.729	84.0827	90.7368	75.517	50.1203	14.4593	62.4029	20.0507	92.5538	72.2467	6.45352	90.6031
Syngr2	20973	chr11:117809667-117814286:+	90.7068	87.0007	98.9978	82.8653	78.3831	54.4892	90.0613	57.8828	93.5706	80.8187	51.071	81.0543
Clptm1l	218335	chr13:73604002-73620639:+	90.6829	98.1847	95.1546	90.7894	103.815	188.208	97.0203	138.737	88.8997	92.1712	182.646	87.943
Mrap	77037	chr16:90738324-90749776:+	90.6582	89.6878	93.9058	66.3289	102.848	123.915	108.513	90.503	108.419	100.939	134.572	85.4569
Vps28	66914	chr15:76622086-76626084:-	90.555	91.3503	91.2724	80.5349	67.353	69.3897	78.5921	63.9506	84.2799	82.6538	64.9211	75.2393
Cdk2ap2	52004	chr19:4097351-4099017:+	90.4031	79.7631	107.299	87.6692	97.5511	106.079	79.463	93.9176	103.88	112.611	99.1695	81.0909
Tmem259	216157	chr10:79977120-79984330:-	90.2576	99.2772	98.9862	91.2098	85.7029	71.2925	92.7788	70.4848	99.8867	93.9554	81.8928	102.132
Bccip	66165	chr7:133709333-133721145:+	90.0803	93.598	88.1394	86.9514	73.5601	69.444	84.5758	65.6038	89.952	91.2071	79.3986	83.4144
Lgals8	56048	chr13:12439402-12461738:-	89.9582	88.128	76.031	76.7457	74.1013	54.2787	70.5586	56.5939	89.7098	75.8521	59.3794	103.123
Nbr1	17966	chr11:101552107-101581951:+	89.8238	85.0369	78.6012	86.1261	80.8443	74.5464	78.4654	79.1782	84.4694	71.914	71.377	98.3346
Galm	319625	chr17:80127471-80185032:+	89.6404	109.562	96.3339	94.8513	60.5818	16.8642	72.6492	36.3524	85.4927	76.3158	12.6514	94.5726
Snap47	67826	chr11:59407141-59450034:-	89.6031	98.7929	96.0303	76.4437	76.189	49.0277	75.3476	51.4998	98.1526	83.5541	41.6206	104.457
Gns	75612	chr10:121365090-121397245:+	89.3269	97.419	91.6786	89.8144	80.082	65.7813	83.1633	71.3501	92.9245	83.3252	66.7191	102.016
Bzw1	66882	chr1:58393136-58406548:+	89.2772	92.4882	82.4048	101.791	75.4282	71.5701	77.9544	71.6699	88.3914	75.7849	91.7331	102.977
Slc37a4	14385	chr9:44396927-44402968:+	89.2593	94.8139	92.4912	75.0635	79.9856	45.8426	87.1354	57.6319	115.33	119.084	24.394	128.674
Eif4ebp2	13688	chr10:61432497-61452669:-	89.1596	114.41	80.9157	125.572	87.5294	66.0155	79.8568	75.4976	74.5745	56.8901	61.4974	104.959
Pdcd6	18570	chr13:74303121-74317326:-	89.0334	102.014	88.2183	88.0017	69.4478	49.5481	83.8865	50.3795	87.6931	93.3949	56.7168	94.1869
Naa60	74763	chr16:3884619-3904781:+	89.0181	106.62	100.292	85.6889	75.8167	40.7707	84.35	49.5969	88.8094	78.1241	36.4585	100.905
Cox17	12856	chr16:38346999-38352763:+	88.9413	91.5115	100.765	82.3621	65.5402	60.449	94.1245	60.5725	89.7687	96.9358	64.3377	79.2355
Fermt2	218952	chr14:45458792-45530065:-	88.7451	76.2385	60.2445	63.9232	106.228	80.3452	83.556	90.5237	61.1847	56.6947	87.6619	85.9095
Atp6v1g1	66290	chr4:63544765-63550701:+	88.7315	87.927	97.7247	112.136	78.9691	78.8464	82.1907	69.4983	96.3219	92.1735	106.112	79.4846
Tef	21685	chr15:81802673-81826863:+	88.5677	104.599	96.0936	96.4654	52.9619	11.871	66.8071	26.6126	82.9033	79.4266	20.6495	99.7695
Larp1b	214048	chr3:40950631-40977793:+	88.5122	91.5426	88.9683	93.332	72.6178	55.2069	74.0928	57.4469	83.9799	67.0508	58.8834	82.9171
Edem1	192193	chr6:108828641-108859356:+	88.4765	83.5765	77.4476	87.344	86.2811	112.906	72.9702	107.223	84.353	79.5825	114.895	90.3753
Ugt1a1	394436	chr1:88211959-88220002:+	88.3865	110.23	90.2517	76.9319	26.4452	13.798	42.2364	13.1537	56.7462	40.3891	13.9214	79.3138
Dnajb11	67838	chr16:22857845-22879634:+	88.2649	82.8281	92.1572	76.9346	110.86	147.873	78.9421	133.44	78.1657	96.4167	143.932	72.2484
Rpn1	103963	chr6:88084473-88105304:+	88.2079	89.377	101.136	85.4026	99.2729	163.398	79.5571	140.86	75.0124	94.4731	151.355	77.4952
Slc19a2	116914	chr1:164249046-164265385:+	88.1343	78.0403	72.9538	78.2097	62.5619	33.5051	56.882	37.9309	60.7814	40.7528	30.3148	65.3814
Slc25a10	27376	chr11:120491837-120501161:+	88.039	124.984	112.336	82.3026	59.1518	31.6897	87.5048	41.265	91.3409	83.0844	25.6697	104.182
Sdr42e1	74032	chr8:117661399-117673689:-	87.9939	81.6995	81.9506	83.231	67.2916	49.9883	70.9597	50.2956	70.9218	55.3641	25.9354	74.9912
Emc6	66048	chr11:73175503-73177042:-	87.9081	91.3032	88.1893	83.5596	71.9238	55.1093	84.8715	56.5952	84.9311	86.2847	59.3977	86.7316
Mocs1	56738	chr17:49428364-49455430:+	87.7725	84.5872	83.8675	68.2809	61.8511	60.9164	67.5541	56.6873	75.6844	68.1681	60.2859	72.1286
Psmd13	23997	chr7:140882394-140898642:+	87.7716	91.3177	84.5271	84.2299	72.1649	68.4305	81.3528	57.3966	85.0897	86.0338	82.5452	93.9981
Phyhd1	227696	chr2:30266203-30282149:+	87.7657	84.0941	84.356	76.295	69.007	44.0977	79.0329	54.969	76.8173	67.2546	37.2147	82.2603
Timm8b	30057	chr9:50603901-50605320:+	87.6737	95.2415	97.3396	84.9675	74.0995	63.6382	87.8015	59.4124	92.373	95.1178	62.4743	80.43
Nedd4	17999	chr9:72662347-72749848:+	87.5395	91.1357	81.3988	95.4026	80.0775	141.339	87.6891	109.297	76.9815	65.0083	179.15	89.4833
Gfra1	14585	chr19:58235581-58455398:-	87.4972	93.1916	73.7021	108.79	118.369	107.669	98.9403	108.92	116.792	105.22	104.155	130.176
Snx3	54198	chr10:42502054-42535369:+	87.2626	92.5138	102.07	93.4209	73.1798	58.4326	86.0411	56.2026	93.8494	89.7587	68.1274	87.763
Sat1	20229	chrX:155213126-155216449:-	87.1555	77.8703	78.4562	106.697	58.1611	43.4276	72.6995	40.2111	81.8707	76.4754	86.595	69.4748
Tmem234	76799	chr4:129600707-129607879:+	87.1299	87.9856	97.6805	87.9016	75.8157	62.5777	85.4143	62.3416	83.5011	81.9339	67.3189	84.3436
Nsdhl	18194	chrX:72918521-72958528:+	87.0117	100.029	99.635	66.6118	76.6018	86.0393	81.129	61.0077	68.5947	36.8083	50.5289	62.5036
Calm1	12313	chr12:100199435-100209824:+	87.009	96.2197	93.1875	83.356	91.6084	91.388	87.7607	90.9928	83.2123	82.6665	77.4754	77.968
Ndufv3	78330	chr17:31520115-31531325:+	86.9297	81.5822	91.9619	73.2533	57.1841	45.1287	70.179	43.3225	74.8552	74.2298	39.089	64.8292
Acy3	71670	chr19:3986570-3990005:+	86.7483	88.2613	98.5802	70.0459	52.7335	33.6675	63.1361	42.8328	83.1057	70.5204	17.7099	96.8996
Dynlrb1	67068	chr2:155236533-155250277:+	86.5289	94.2369	94.6941	68.1952	68.3931	57.0094	88.5781	50.5266	89.8025	89.8623	55.0364	76.0576
Nop53	68077	chr7:15937836-15946108:-	86.3274	94.8769	95.5656	97.2816	62.1901	40.5717	78.0105	42.8418	86.5432	84.3532	52.1032	83.3482
Cwc15	66070	chr9:14500619-14510620:+	86.2055	86.1662	84.7426	82.1585	58.3394	53.0195	70.0915	48.8042	87.163	82.6536	62.1135	85.1517
Stard7	99138	chr2:127270229-127298934:+	86.1686	92.9574	85.4101	84.92	62.2178	37.1207	72.5368	43.1579	77.585	65.8041	40.6323	82.2805
Fabp2	14079	chr3:122895072-122899506:+	85.9661	142.573	117.536	59.0518	59.2673	57.2967	110.217	63.4107	117.102	96.506	49.5395	79.0631
Atp6v0d1	11972	chr8:105524470-105566040:-	85.9074	87.8899	90.735	88.8986	71.206	79.9004	73.1854	69.7076	83.0911	80.3874	84.5123	81.9505
Tgm2	21817	chr2:158116405-158146392:-	85.8486	100.42	90.024	97.0956	95.4872	161.609	100.591	124.356	114.287	126.184	378.587	110.363
Gucd1	68778	chr10:75506814-75517972:-	85.8366	95.7793	98.5796	91.1693	114.633	85.221	102.056	87.0811	98.5615	91.7467	61.3897	97.4495
Tomm40l	641376	chr1:171217803-171222514:-	85.6154	147.059	129.075	48.0481	68.1156	30.0387	84.8126	50.7464	73.821	75.5887	19.0779	87.6852
Dnaja1	15502	chr4:40722468-40734965:+	85.5999	84.8759	77.4728	72.9673	67.895	32.6566	77.0588	38.9434	109.734	83.9638	35.2017	101.463
Ap2m1	11773	chr16:20535480-20544909:+	85.4774	89.2999	90.8452	90.9921	82.9718	75.0182	79.836	71.5886	92.9522	83.2875	80.0698	89.9989
Acadsb	66885	chr7:131410601-131446211:+	85.2449	82.873	76.8355	92.0846	52.5372	28.3437	61.1781	41.2706	70.4133	60.9899	23.8899	82.0919
Nop10	66181	chr2:112261926-112262898:+	85.0684	85.6872	91.0872	82.2593	62.3384	52.057	78.9327	51.9256	81.4421	89.0656	53.416	75.3125
Serpina4-ps1	321018	chr12:104077959-104086920:+	85.0407	82.0277	165.613	177.978	149.173	101.572	73.5891	83.3594	102.614	57.571	84.5852	53.7049
Rp9	55934	chr9:22448312-22468356:-	84.933	85.9698	84.015	75.2264	88.977	69.8464	87.8254	74.9262	86.6949	105.417	86.7585	83.2353
Spop	20747	chr11:95414083-95493410:+	84.7923	89.7134	84.1924	86.7835	81.3858	69.3371	88.7979	70.8764	83.0824	77.2887	69.3056	80.791
Nars	70223	chr18:64499647-64516557:-	84.7433	80.4346	80.0436	89.1963	82.4711	105.876	77.6559	89.3333	92.291	85.5156	142.513	90.149
Akr1c20	116852	chr13:4486856-4523344:-	84.6509	74.6318	81.8828	53.7943	56.4773	10.1705	75.6885	21.1074	83.2119	47.6906	5.38357	62.9817
Man2a1	17158	chr17:64601649-64755110:+	84.5953	96.2542	79.2112	103.069	96.4353	109.703	101.868	117.654	105.018	85.3434	122.574	118.428
Aldoa	11674	chr7:126795234-126800447:-	84.4647	74.4235	94.3099	84.4219	66.364	56.9185	215.528	45.8624	80.4937	72.3759	161.756	66.9891
Romo1	67067	chr2:156144153-156145794:+	84.4122	83.4718	98.21	82.0241	74.8207	67.9534	83.2832	63.096	89.634	92.0479	67.1719	76.1836
Csde1	229663	chr3:103020546-103058186:+	84.369	83.6329	77.9657	86.9357	67.3508	57.1679	78.949	54.6733	79.333	68.981	74.5273	82.1717
Hfe2	69585	chr3:96525185-96529216:+	84.3592	79.2463	84.1203	76.6261	89.4383	84.5247	90.1502	82.9859	61.7279	65.3209	55.715	70.8985
Ddb1	13194	chr19:10605625-10629821:+	84.2495	88.9507	87.0881	89.1656	79.2399	81.7832	78.6755	74.0011	88.2946	77.8392	95.6216	98.6941
Mut	17850	chr17:40934685-40961989:+	84.0278	85.8151	70.6666	86.6913	60.8485	45.1547	59.5942	51.9894	66.285	53.507	33.2077	84.7602
Cideb	12684	chr14:55754055-55758424:-	83.9588	88.7505	86.767	75.9742	67.2251	44.9374	71.9282	55.5321	77.1363	73.0564	44.6845	96.1795
Alas2	11656	chrX:150547417-150570622:+	83.9134	86.5413	79.0993	88.2102	38.5544	24.6272	54.6721	31.0923	62.7755	59.3505	18.6552	85.6406
Slc39a7	14977	chr17:34028266-34031690:-	83.8456	85.0271	94.7948	76.7696	102.639	138.545	91.3287	117.387	101.009	103.89	157.929	84.4885
Fmo1	14261	chr1:162829561-162866610:-	83.8283	73.1787	85.4989	81.4018	65.6732	32.9439	59.5351	53.0459	67.9874	53.4005	17.4061	73.3697
Mtss1	211401	chr15:58941234-59082026:-	83.7914	84.1577	76.241	99.7047	73.8868	57.38	74.295	64.9275	91.527	84.1618	65.6088	89.8922
Abcc3	76408	chr11:94343295-94392976:-	83.7339	106.64	91.9848	71.3861	51.3986	23.864	69.1499	24.63	69.4621	55.7441	19.5008	72.0221
Hprt	15452	chrX:52988078-53021660:+	83.6804	84.6885	76.4732	76.4097	62.9581	61.9713	78.3671	60.5479	74.5786	71.0842	83.4041	72.0551
Sec61g	20335	chr11:16501638-16508484:-	83.6723	80.3924	101.968	77.9299	85.2515	122.085	83.4996	114.637	93.6533	93.21	146.967	69.3032
Hnrnpu	51810	chr1:178321108-178337815:-	83.6002	66.163	75.6041	74.7044	69.4745	57.2772	65.6188	60.0522	68.55	57.7884	65.7273	69.7789
Xylb	102448	chr9:119357381-119393797:+	83.5292	97.1353	79.8408	92.7206	72.9083	38.5604	76.6107	53.847	88.2891	84.6094	49.6149	89.8727
Pcbp2	18521	chr15:102470632-102500059:+	83.2886	89.758	88.1192	109.69	62.0929	49.2185	70.7689	49.7023	78.1142	72.1166	66.6253	79.4306
Tm2d2	69742	chr8:25017211-25023260:+	83.204	79.7565	85.2497	74.4832	66.987	38.7538	72.4934	45.5898	83.9084	75.7688	38.2442	81.4529
Poldip2	67811	chr11:78512296-78522736:+	83.1185	90.7085	92.3326	81.8164	63.3111	51.4265	71.409	54.983	79.4791	76.103	57.264	79.4536
Tcea3	21401	chr4:136247957-136274899:+	83.0065	98.399	95.5996	95.873	42.0004	4.69674	58.8987	16.9755	67.562	62.7111	2.92188	77.5912
1810019D21Rik	69771	chr8:106135400-106138722:+	82.9812	69.9028	80.5707	71.0032	52.7691	24.6534	52.3742	41.5591	63.1329	41.4636	25.3097	60.2541
Pcyox1	66881	chr6:86386006-86397150:-	82.8726	93.1137	81.6592	81.2754	70.5976	44.4084	76.3179	51.0455	77.0388	60.6715	42.4868	91.1155
Pex5	19305	chr6:124396816-124415067:-	82.8683	92.2094	87.2984	81.744	66.9985	48.7985	73.1921	53.8389	83.8733	75.2436	47.2559	87.1026
Plxnb2	140570	chr15:89155546-89180788:-	82.8564	88.8757	79.0653	80.5986	83.7803	54.3032	76.9894	63.0376	78.9122	70.7094	47.9721	90.4313
Tax1bp1	52440	chr6:52713729-52766779:+	82.7493	84.4746	79.0598	78.2197	76.9706	64.275	82.576	64.0717	83.2595	71.4092	69.9755	90.0919
Gys2	232493	chr6:142422613-142473109:-	82.7133	102.354	88.5503	110.759	50.2101	32.4872	68.1392	46.624	62.3668	72.3199	32.3498	99.5071
Gde1	56209	chr7:118688558-118705738:-	82.7084	115.077	99.662	84.7782	87.4438	85.7302	105.619	81.1984	114.32	125.03	113.809	113.222
Cdc34	216150	chr10:79682195-79688398:+	82.5902	79.2122	98.1422	72.6416	69.5348	59.8659	74.2951	50.001	83.3132	87.6813	59.8838	77.484
Sult1d1	53315	chr5:87554650-87569006:-	82.526	52.3614	56.5008	79.5957	54.0109	24.6685	61.4356	38.2693	74.7492	51.2945	12.1024	71.274
Pex16	18633	chr2:92374676-92381220:+	82.3766	91.1705	91.9474	70.1279	54.9541	44.6617	69.8554	40.1284	72.819	66.2438	36.1454	79.4363
Sec11a	56529	chr7:80915379-80947550:-	82.2849	76.7783	87.712	66.5938	81.3899	77.0537	75.8882	74.1815	91.092	86.3777	74.2293	84.413
Rtraf	68045	chr14:19811402-19823823:-	82.1595	81.9018	85.7432	78.8845	66.8174	49.6843	73.8722	51.8834	85.6262	76.9302	56.8066	76.065
Cdc42	12540	chr4:137319696-137357759:-	82.1227	87.1555	84.3351	87.5231	71.0926	67.8906	81.0046	63.5343	86.3415	76.8492	83.3256	83.3873
Pon3	269823	chr6:5220852-5256233:-	82.112	91.1164	75.8553	79.1039	88.7079	65.5814	83.0083	78.1766	78.1872	65.459	47.1467	81.7463
Tufm	233870	chr7:126487355-126490731:+	82.0978	90.1562	89.4723	84.5292	54.5143	45.515	64.0126	48.7991	76.8515	71.2826	41.4282	83.7901
Pxdc1	66895	chr13:34627841-34652681:-	82.0184	79.2386	80.8634	60.3843	59.4921	44.5088	54.7319	48.5406	56.6553	55.0313	53.2318	60.0961
Acly	104112	chr11:100476352-100528000:-	81.9871	80.0319	75.5251	107.441	58.3585	46.9343	45.8212	46.1256	70.9773	40.1163	38.1969	63.4225
Dbp	13170	chr7:45705247-45710203:+	81.9798	96.3256	94.601	84.3619	15.2816	1.16346	39.1745	3.52904	56.5909	61.0275	3.32248	81.3644
Nudc	18221	chr4:133532542-133546027:-	81.9671	83.528	84.8576	82.619	68.6507	56.7836	74.1555	47.7523	88.4707	83.0927	64.137	81.8626
Mrps12	24030	chr7:28739641-28741781:-	81.9151	92.6755	96.2538	80.4303	87.5359	92.6598	90.8687	83.8883	90.8134	97.8932	80.0957	88.7131
Ddx17	67040	chr15:79527696-79546741:-	81.7636	67.1855	70.8379	82.3007	71.877	54.2924	67.7558	65.2359	77.832	59.3192	61.7474	73.2402
Vps25	28084	chr11:101253707-101259547:+	81.7386	86.0681	87.8078	76.5982	66.003	60.3127	74.3874	54.0198	82.0631	81.5308	59.2554	75.9466
Csnk2b	13001	chr17:35116195-35122053:-	81.7171	85.9571	94.4588	84.6387	67.2328	58.9587	78.5272	55.7394	92.8653	88.3337	71.1373	82.0885
Mir568	100124467	chr16:43640655-43640737:+	81.3324	107.439	84.1758	61.9954	50.9863	31.0819	48.1164	31.9828	63.3434	58.4698	50.7743	84.4737
Mrps7	50529	chr11:115604140-115608036:+	81.275	87.2709	91.6212	69.2797	61.5663	48.5316	77.3039	46.6371	92.7726	90.2642	43.9238	82.748
Mlycd	56690	chr8:119394892-119411088:+	81.2571	93.105	102.026	88.3671	72.5262	58.5683	79.1956	58.7636	69.42	80.7077	46.9297	83.7716
Osbpl9	100273	chr4:109061145-109202272:-	81.2531	92.9851	76.285	84.4377	70.2224	43.5418	74.3621	48.1011	77.01	73.4426	50.6121	90.7351
Psenen	66340	chr7:30561866-30563184:-	81.2379	92.0355	94.0261	88.1746	68.0708	67.7934	74.3647	57.3848	89.2726	84.1122	72.399	72.8589
Abcc6	27421	chr7:45976380-46030286:-	81.179	79.5182	74.8249	81.9564	49.7336	19.5053	48.0521	31.5618	63.2448	57.2796	13.1749	71.3499
Naxe	246703	chr3:88056523-88058495:-	80.8082	86.4292	91.1794	76.395	53.2889	44.377	65.3817	44.6753	71.5057	73.5127	41.3278	68.2468
Nipsnap3b	66536	chr4:53011880-53022060:+	80.7577	92.9827	86.0995	79.1835	70.7326	55.1235	76.9604	55.9176	76.6593	75.2046	68.0259	75.9368
Vegfa	22339	chr17:46016993-46032377:-	80.757	69.1711	72.8194	84.4323	62.9598	30.6526	54.7792	44.0292	76.8501	59.1196	59.8742	65.4038
Cyp4f13	170716	chr17:32924688-32947361:-	80.7494	80.4704	80.3057	75.1524	59.2619	35.2492	62.7795	43.6004	73.5187	68.8622	34.6109	74.8778
Stt3a	16430	chr9:36732413-36767578:-	80.6801	80.9222	81.5426	82.7706	97.5016	138.906	74.4815	132.245	84.1847	79.7204	146.85	86.6873
Copa	12847	chr1:172082529-172122332:+	80.5968	87.7788	85.4188	84.5884	84.3333	102.334	72.1634	95.7982	78.6769	72.1265	115.062	86.7207
Eif4ebp1	13685	chr8:27260327-27275656:+	80.5117	91.4726	96.9478	77.0052	79.5281	62.901	107.905	57.0339	89.0575	98.2508	96.8813	88.4293
Tedc2	72016	chr17:24215056-24220851:-	80.434	96.5542	78.3313	61.7278	102.932	64.7103	109.097	89.2352	127.86	123.081	59.1102	108.743
Pdk2	18604	chr11:95026258-95041371:-	80.2766	84.1021	83.9694	79.6074	53.5456	29.9786	70.4688	40.9659	77.4988	63.5205	29.9512	85.7931
Samm50	68653	chr15:84192233-84214303:+	80.2521	80.5925	91.1215	89.064	64.8655	60.0137	74.1929	56.5521	80.4262	70.1693	61.584	82.2553
Sirt3	64384	chr7:140863663-140882309:-	80.1499	101.654	86.6006	78.3052	60.5749	39.4883	72.1059	44.6858	69.9763	67.5928	29.8789	73.7352
Rnaseh2c	68209	chr19:5601873-5602959:+	80.1154	92.211	90.0289	76.8572	52.6015	25.3641	58.1263	36.6671	82.2897	76.1697	28.2011	70.942
Chuk	12675	chr19:44073334-44107477:-	80.0856	88.6209	77.0953	83.4248	58.9587	50.2612	63.7149	45.4875	60.1413	51.4083	65.1832	77.853
Tmem208	66320	chr8:105326364-105329057:+	79.9425	87.3824	87.307	78.4734	79.6903	72.6931	88.3136	72.8086	70.6863	89.49	72.6735	71.7992
Ywhab	54401	chr2:163995197-164018587:+	79.8719	83.8627	82.7209	79.9115	65.0161	60.9051	75.9941	54.5509	84.9059	83.9657	68.2129	83.1252
Slc39a1	30791	chr3:90248192-90253612:+	79.8705	97.0219	77.9797	85.0302	91.5035	75.4949	95.7446	79.1876	88.4723	91.5688	94.1461	94.7659
Vmp1	75909	chr11:86584262-86684000:-	79.8007	78.2588	73.6319	74.7136	99.0563	147.495	108.138	112.093	107.294	98.5397	158.664	92.6291
Gne	50798	chr4:44034075-44084177:-	79.7867	77.92	70.5559	67.3495	66.8363	32.3282	68.8159	37.0324	73.978	75.2024	24.1073	84.0718
Ddx3x	13205	chrX:13281022-13293983:+	79.7325	90.732	70.6672	90.7514	78.9227	67.2836	80.0787	77.5961	79.164	63.2983	108.253	81.5601
Dnaja2	56445	chr8:85537640-85555271:-	79.7094	81.8644	82.4081	76.6446	66.6202	53.6378	72.0334	53.3691	81.9173	71.189	65.3145	91.9157
Aspscr1	68938	chr11:120672973-120709446:+	79.6168	79.3355	84.5062	75.3086	63.7564	44.0108	69.1629	42.0546	79.6512	71.5099	42.749	73.1077
Pfdn2	18637	chr1:171345699-171358170:+	79.589	75.3699	87.4311	69.7899	55.9784	44.6145	72.5463	46.1798	82.3343	79.5038	48.5567	74.8065
Sh3bgrl	56726	chrX:109095407-109162467:+	79.5556	77.0818	66.116	67.0168	70.2365	62.9387	82.5659	69.602	79.1889	72.9972	64.1143	74.6397
Ece1	230857	chr4:137862237-137965229:+	79.4765	83.7039	79.5012	85.2822	80.7542	37.7287	75.2233	58.3564	83.4524	69.9126	28.9133	89.2429
Tcf25	66855	chr8:123373711-123404174:+	79.396	84.7175	80.9049	84.0373	69.3034	69.868	71.5839	63.7493	74.7966	70.9481	75.2467	79.5632
Sec11c	66286	chr18:65800578-65817657:+	79.3901	71.0084	85.5852	60.7124	76.5076	101.87	73.2082	90.3421	58.6695	67.5733	89.3936	57.3653
Gstm2	14863	chr3:107981702-107986436:-	79.3766	62.6859	86.1474	77.4839	53.5851	34.0963	77.0769	28.4746	92.6186	51.1039	16.4358	65.8091
Itgb1	16412	chr8:128685654-128733579:+	79.263	80.4079	67.3546	83.9513	75.3074	55.1776	78.9258	58.9288	71.6086	62.2944	62.352	76.323
Eif3l	223691	chr15:79075223-79094400:+	79.1274	85.5199	86.5831	84.6123	66.4462	58.0483	71.0265	58.2857	80.6114	73.4048	62.1723	85.5244
Hmgn1	15312	chr16:96121588-96127725:-	79.0694	86.3715	84.9196	93.3784	68.4709	75.8832	74.9002	66.9315	77.6184	72.1294	72.8717	68.7322
Cstb	13014	chr10:78425670-78427622:+	78.8691	82.4448	83.0169	76.6551	71.8975	104.007	84.5643	81.9731	80.4334	77.4511	119.956	66.598
Tapbp	21356	chr17:33919478-33929290:+	78.8524	83.7171	75.8054	80.2	71.0313	70.1552	76.2009	63.2889	84.8045	87.2756	71.4829	79.1758
Mrpl34	94065	chr8:71464926-71465753:+	78.8382	75.4884	87.3982	79.5688	65.7681	52.9947	80.2257	49.2056	86.6102	79.498	43.5589	78.2434
Tomm22	223696	chr15:79670868-79672862:+	78.8155	83.5012	85.3163	76.979	68.3733	52.5655	79.1667	51.3153	87.0292	86.8662	58.0457	75.2547
Ppara	19013	chr15:85735564-85806851:+	78.8127	112.967	90.0071	76.3591	51.2947	25.1	60.0388	34.3946	65.0453	52.6988	31.6352	101.553
Capzb	12345	chr4:139192899-139291820:+	78.8004	78.4754	80.2862	83.1493	67.7502	59.9525	78.1435	57.7736	85.2893	86.7079	70.52	79.523
Vdac2	22334	chr14:21831561-21845879:+	78.7073	80.6353	86.1196	82.4074	55.6645	46.315	68.2486	48.1212	76.5064	68.1573	54.4111	78.2359
Pglyrp2	57757	chr17:32412461-32424167:-	78.5783	77.3471	66.9897	105.752	86.3624	78.5215	67.9707	76.7014	67.908	61.5584	56.7768	78.1177
Mrpl33	66845	chr5:31613951-31622644:+	78.5477	79.7154	82.3923	73.4183	60.5117	52.5176	75.4561	55.7966	70.3396	81.8631	51.9059	67.1588
Anpep	16790	chr7:79821803-79848210:-	78.4833	93.378	82.8179	80.5179	86.9883	58.6146	92.4974	77.4772	88.2583	81.7991	52.5812	102.382
Nadk2	68646	chr15:9071260-9110496:+	78.4747	85.8843	73.6855	83.2284	54.1109	36.7141	55.523	44.5961	59.3521	46.2313	35.3694	77.7381
Car5a	12352	chr8:121916138-121944912:-	78.3804	80.139	70.6774	56.0157	27.8658	0.72804	41.0741	5.30313	60.5281	44.3581	0.8815	61.0259
Drap1	66556	chr19:5422804-5424979:-	78.3157	82.3799	83.306	84.043	55.291	51.5412	70.8364	50.7825	77.698	73.0538	62.534	66.6138
Cct4	12464	chr11:22990593-23003336:+	78.2113	75.3982	81.8634	91.1323	58.3739	38.2668	70.2338	38.4299	78.2785	66.8671	47.1587	84.2292
Esrp2	77411	chr8:106131183-106136974:-	78.1225	64.9544	69.5851	74.5718	72.5403	40.8116	62.8605	55.1253	72.0977	57.2	46.018	79.5071
Wdr83os	414077	chr8:85080963-85082339:+	78.1184	77.6378	88.5154	72.6743	59.3428	51.8692	72.501	48.2012	80.8789	74.3491	49.0484	71.4901
Mcee	73724	chr7:64392622-64412121:+	78.0175	75.2016	80.5542	67.5372	45.6592	19.6743	57.3937	35.1178	66.0569	64.0412	14.7193	65.9216
Mindy1	75007	chr3:95282935-95296164:+	77.9709	75.2302	77.001	61.8488	61.6666	48.5166	65.3251	48.1793	65.1364	54.1904	53.0222	69.0246
Mrps24	64660	chr11:5703983-5707699:-	77.7625	83.5446	78.4435	63.9275	60.665	43.8286	73.164	48.9372	72.8355	76.01	36.4006	72.7273
Glmp	56700	chr3:88325023-88328631:+	77.6418	76.4847	80.019	78.1043	70.8777	63.3279	77.2934	65.586	81.8416	82.4532	67.9186	74.5629
Mcl1	17210	chr3:95658721-95663178:+	77.6093	70.6261	66.5524	94.8346	61.2693	34.1323	65.9666	39.9182	68.3138	60.6727	49.6897	77.9604
Bckdhb	12040	chr9:83925137-84124240:+	77.5978	72.8985	71.9119	76.1506	58.6491	74.6707	64.8491	66.5963	69.392	61.5061	52.375	70.1879
Vdac3	22335	chr8:22577075-22593813:-	77.5894	81.1439	77.0523	78.7835	60.1847	46.5971	74.0337	51.9941	78.3176	75.374	62.871	80.2676
Tcn2	21452	chr11:3917078-3932078:-	77.5045	83.7247	79.8883	70.8393	56.2264	42.9726	61.428	42.3976	77.7549	75.2607	36.239	77.5813
Dhcr7	13360	chr7:143823167-143848410:+	77.2973	76.1273	82.3659	65.7626	80.0794	105.626	72.4588	83.3179	62.2797	37.5431	57.8352	59.8461
Lims2	225341	chr18:31931507-31958619:+	77.2284	77.5519	84.1592	52.8597	67.2926	41.3884	68.5843	48.5897	92.4392	92.4365	30.6094	90.247
Bet1	12068	chr6:4076904-4086927:-	77.1555	72.959	81.6189	63.4783	62.6208	62.8279	62.2493	65.1409	74.4266	68.0929	69.4413	68.4784
Lamtor4	66096	chr5:138255482-138259395:+	77.1448	83.4364	86.4828	66.5377	52.5059	45.4758	66.2653	40.824	72.9005	78.8717	41.9965	68.7541
Cyp7a1	13122	chr4:6265612-6275631:-	77.0022	93.9986	34.8657	85.9685	17.8465	0	9.75958	0.14683	86.7818	26.8279	0.49454	55.9628
Echdc3	67856	chr2:6188465-6212994:-	76.9935	82.6217	78.4	73.924	45.2062	19.7398	56.1388	33.8827	64.4417	61.871	9.30302	68.4529
Cmtm8	70031	chr9:114789345-114844152:-	76.9805	92.2391	77.4947	87.2043	52.6895	30.4061	62.4279	44.0126	63.8093	69.0513	34.7393	73.5637
Trabd	67976	chr15:89076064-89087075:+	76.969	79.3764	92.5053	73.6998	98.398	118.166	80.2941	104.417	86.5252	97.171	119.445	77.8212
Aldh3a2	11671	chr11:61223417-61267528:-	76.9525	142.334	107.279	49.8131	40.582	10.2366	77.6346	17.4446	59.3836	52.2423	9.66322	83.069
Gm4952	240549	chr19:12599984-12627616:+	76.9179	105.302	86.8048	57.0201	129.266	41.0372	140.252	85.7487	71.0391	66.1263	45.7539	72.9694
Ces1e	13897	chr8:93201218-93229619:-	76.8881	105.797	90.8154	71.4824	19.5451	3.56525	36.7366	6.76391	52.7901	48.9249	3.43057	55.622
Imp3	102462	chr9:56937500-56938398:+	76.8421	72.0421	84.7866	76.4786	59.7034	46.7672	66.6861	45.882	70.9722	69.6984	49.9536	55.373
Hhex	15242	chr19:37434841-37440731:+	76.8277	106.948	60.952	97.2412	84.3907	65.0786	69.9837	66.2211	66.3734	66.4598	55.0034	92.2078
M6pr	17113	chr6:122308720-122317680:+	76.8258	75.7359	73.4785	74.4386	64.1905	60.9636	67.4964	54.5339	72.9079	67.1947	65.0014	71.165
Rpl22	19934	chr4:152324436-152334082:+	76.7789	82.4857	85.7044	79.1405	58.0084	46.4363	72.7076	46.5585	82.1415	78.8482	52.0033	69.0998
Cuta	67675	chr17:26937972-26939538:-	76.7361	79.6506	80.8167	68.6916	53.6966	41.8853	62.1154	40.7239	73.3359	73.2839	38.3047	66.3693
Tfpi2	21789	chr6:3962589-3988858:-	76.6776	67.5962	61.2996	70.9782	47.3137	41.4528	56.92	46.6626	63.4613	48.5264	56.7245	67.2691
Eif3c	56347	chr7:126546911-126566366:-	76.5421	74.5254	78.6233	81.1803	66.0478	61.7889	66.7219	55.9737	77.3168	72.4289	84.172	85.2142
Rnf11	29864	chr4:109452857-109476505:-	76.4842	75.1921	68.9944	88.5813	60.8645	72.0135	65.8634	60.8826	69.9612	68.576	109.149	85.773
Abhd17c	70178	chr7:84109356-84151893:-	76.4477	64.0259	67.1328	78.1241	49.2011	40.5011	54.9086	42.0926	61.5431	58.7952	54.6673	68.8942
Faah	14073	chr4:115996656-116017902:-	76.4022	79.7866	75.3955	78.4243	55.5697	14.0326	58.8959	30.9293	66.6253	56.2145	12.4932	75.6486
Abcb4	18670	chr5:8893721-8959226:+	76.3319	99.85	88.3509	60.7185	70.4839	47.1558	83.3597	50.4273	56.4177	54.4958	61.9859	87.9211
Sod2	20656	chr17:13007839-13018119:+	76.0069	84.75	78.4639	74.2807	61.5674	214.059	86.2863	146.224	71.4932	72.8681	213.03	86.6914
Txnrd1	50493	chr10:82833951-82897724:+	75.9211	82.0961	72.6992	74.79	71.7683	47.2751	73.4192	44.8805	72.934	71.5183	79.6052	88.8131
Sidt2	214597	chr9:45937857-45955249:-	75.7214	80.3793	79.3143	74.8453	76.5043	69.4973	75.5039	65.5503	85.487	74.396	74.5828	92.8975
Sil1	81500	chr18:35266396-35498925:-	75.6247	73.1208	81.5768	69.7549	66.6349	53.8013	61.4937	58.6112	71.7458	69.3847	49.1437	69.4792
Copb2	50797	chr9:98563731-98588375:+	75.5735	80.5962	76.0354	75.9317	74.7391	87.0694	66.6613	82.4486	80.1157	72.6544	97.3329	88.9794
Idh3g	15929	chrX:73778963-73786897:-	75.4574	80.7419	80.9596	71.7674	52.3824	49.1894	74.2881	43.417	72.1735	68.2148	43.6348	70.1563
Pafah2	100163	chr4:134396320-134427412:+	75.4555	75.0474	67.6319	66.7469	74.9228	65.8228	71.0401	66.4977	74.7154	62.3861	42.2173	81.2476
Dnajb9	27362	chr12:44205897-44210068:-	75.4088	60.5742	68.0384	58.7031	89.6405	156.795	98.4293	140.001	93.3762	92.7877	165.308	89.3033
Brk1	101314	chr6:113604772-113616951:+	75.3491	77.4355	88.1767	74.8872	54.833	48.9661	72.189	44.3827	81.0898	84.9364	55.7252	70.6662
Pex11g	69129	chr8:3458817-3467648:-	75.273	76.7517	80.3828	64.8526	72.5615	75.6687	68.8562	71.2698	67.4437	62.685	56.998	71.0982
Xdh	22436	chr17:73883895-73950196:-	75.2504	72.0284	72.4641	79.0145	55.1669	38.7911	59.2854	44.7872	72.1944	59.1935	40.7589	72.1798
Mpdu1	24070	chr11:69656699-69662649:-	75.227	83.4176	78.8513	74.288	57.0463	45.2362	68.266	43.8603	70.5349	73.2108	45.2856	76.8993
Tmed2	56334	chr5:124540791-124550503:+	75.1205	83.0786	80.0562	74.1147	76.183	91.9301	73.1677	84.6085	78.4804	82.8609	99.5332	71.743
Dnaja3	83945	chr16:4684070-4707693:+	75.0349	79.054	79.2845	66.988	71.8912	75.3369	76.3508	60.323	87.2546	77.9602	67.2416	80.746
Fmc1	66117	chr6:38534861-38539449:+	75.0066	77.8793	82.2103	82.2972	42.5647	37.4708	57.3541	37.8144	62.2581	63.659	24.2886	62.8721
Pdcd4	18569	chr19:53892231-53929861:+	75.0066	68.2013	61.4894	95.7747	67.9311	46.8102	57.1647	59.3314	56.8067	49.9662	46.4577	75.6842
Psmd1	70247	chr1:86064619-86139295:+	74.9605	68.2343	66.8278	68.9302	62.7593	41.6504	64.2883	39.0919	67.2996	57.3362	53.8486	76.6594
Rarres1	109222	chr3:67478886-67515523:-	74.9534	59.949	80.2503	20.1349	41.4245	23.7685	39.4951	26.6282	56.8112	42.5353	24.6405	74.5808
Mid1ip1	68041	chrX:10717365-10719702:+	74.9337	57.4654	67.9862	50.5401	30.7074	9.07532	30.9	14.3471	52.2349	29.5068	8.25098	48.0134
Hibch	227095	chr1:52845038-52920986:+	74.925	72.7199	72.9076	64.4796	54.2324	42.5629	58.5165	41.6617	66.8144	52.8741	32.0283	69.8427
Btd	26363	chr14:31641057-31668197:+	74.8135	76.881	73.9296	85.0425	71.7169	53.3523	73.9146	56.6048	79.5466	78.0689	68.3345	76.474
Ctsa	19025	chr2:164832872-164841032:+	74.7377	80.3979	74.6073	69.4599	66.1311	48.2455	69.274	56.2398	84.0789	81.5569	50.0125	73.3898
Ndufab1	70316	chr7:122088044-122101848:-	74.7253	80.4478	87.4898	88.2009	58.9737	44.2749	72.758	48.497	81.2154	70.3376	44.7766	74.6546
Fis1	66437	chr5:136953275-136966234:+	74.6663	80.0879	92.4144	70.1396	64.7505	60.2969	74.563	55.651	81.1048	87.0169	63.8562	73.8034
Rab5c	19345	chr11:100715003-100738215:-	74.6268	77.9701	83.8806	70.5947	63.2419	56.3089	68.8678	49.2143	79.6964	77.231	60.1689	75.0348
Aifm1	26926	chrX:48474944-48513563:-	74.5948	82.8691	74.2655	74.6905	55.0286	40.7804	61.2572	43.0586	66.3053	58.0319	45.1407	70.0378
Atp2a2	11938	chr5:122453513-122502225:-	74.4432	66.6308	70.8032	79.1803	97.3535	129.608	92.8506	112.96	86.1426	77.0427	146.464	85.5053
Junb	16477	chr8:84976909-84978748:-	74.4359	51.2336	88.0508	60.899	112.514	82.7596	94.3779	71.0993	69.458	44.5369	132.483	90.7592
Dnajc12	30045	chr10:63382443-63408840:+	74.3472	76.6402	33.7537	123.678	127.418	69.7242	96.9199	89.7573	114.884	131.141	75.6407	115.898
Gorasp2	70231	chr2:70661509-70691725:+	74.2517	70.3013	82.5801	68.9547	75.3484	74.1872	72.3304	72.1488	90.5934	83.5887	83.0257	83.0099
Saa3	20210	chr7:46711998-46715676:-	74.1591	54.1234	46.2288	55.153	14724	22886.2	15539.8	25715.2	7770.43	4143.71	21316.1	3684.75
Cd5l	11801	chr3:87357881-87371074:+	74.1229	48.0798	76.5381	52.6714	85.527	39.5686	69.7013	63.154	129.432	111.582	27.5202	61.6115
Dcaf8	98193	chr1:172148015-172196393:+	74.1027	78.3447	71.0737	72.9612	61.7335	46.5164	67.5673	51.4145	65.9556	56.8552	57.4629	71.2362
Ubqln1	56085	chr13:58176156-58215653:-	74.0705	69.426	71.0705	67.9283	73.1709	55.8777	73.7131	55.2874	81.9883	61.3636	56.1416	83.1585
Lifr	16880	chr15:7129572-7197489:+	74.0702	54.6552	54.9565	56.1869	22.7806	9.13642	19.9467	11.5672	50.843	32.2044	8.1909	49.2618
Ldlr	16835	chr9:21723576-21749918:+	73.931	78.3853	74.9948	77.673	74.8887	43.1758	57.9549	50.9181	76.7348	49.6673	38.3786	65.7219
Stap2	106766	chr17:55997076-56005606:-	73.8604	69.4891	60.4415	65.5148	65.6666	72.3666	66.0223	65.0704	85.1414	97.5149	91.1782	85.0896
U2af1	108121	chr17:31647082-31658754:-	73.8515	67.6457	77.8701	74.2427	61.903	44.8125	64.7088	43.8865	85.4992	72.026	52.2367	69.7598
Adtrp	109254	chr13:41763148-41847616:-	73.7497	85.0535	84.5526	53.0553	62.2779	57.6597	79.393	57.8269	70.1941	73.7355	71.0658	85.3252
Lamtor1	66508	chr7:101905837-101911903:+	73.7417	72.7399	79.5005	70.8952	60.9417	45.2678	65.7211	45.339	74.047	72.2039	56.4094	57.8275
Vapa	30960	chr17:65580053-65613555:-	73.7259	75.3764	79.2779	74.4311	60.7866	55.0016	68.0332	48.7735	80.2753	72.3388	63.7867	77.8512
Hnrnpl	15388	chr7:28810890-28822266:+	73.6059	73.5088	75.3133	72.9875	55.8661	61.9445	58.8267	57.9927	61.7257	58.5624	85.1125	59.484
Sfxn1	14057	chr13:54071845-54108345:+	73.5919	79.8441	84.6025	94.7344	77.5963	66.7219	79.3112	75.1874	92.5335	88.5383	75.4244	105.975
Ube2b	22210	chr11:51985146-52000466:-	73.4888	75.5837	71.3247	78.8008	50.0823	44.1641	77.2486	43.306	71.4745	62.6155	53.9385	76.4571
Atxn7l3b	382423	chr10:112925428-112929026:-	73.4644	76.0597	64.6212	77.008	72.0175	61.1613	73.3905	66.0612	76.0529	65.6974	62.2314	78.5273
Hs6st1	50785	chr1:36068400-36106446:+	73.3326	75.7978	61.8083	68.1057	74.6847	44.0018	67.6281	49.2879	86.5316	76.9076	63.6819	71.7602
Ormdl3	66612	chr11:98581294-98587245:-	73.2269	96.0443	93.3711	59.6654	76.0738	68.0009	90.4014	61.1349	76.6504	73.9107	85.9528	72.4353
Map2k3	26397	chr11:60932057-60952803:+	73.1713	78.1994	76.8907	65.3552	57.7812	29.9048	59.8704	37.364	72.0095	63.1603	32.4274	82.4255
Trappc1	245828	chr11:69323986-69325793:+	73.0937	69.4925	75.1083	64.0723	60.6279	62.8922	67.285	53.7219	67.8696	72.0672	57.8637	61.857
Uba1	22201	chrX:20658302-20683179:+	72.9997	71.3747	71.1027	73.3646	59.755	57.0595	60.0838	57.7606	73.4073	63.1274	63.4749	74.1522
Rbm39	170791	chr2:156147241-156180238:-	72.7475	61.1652	69.8862	70.3385	57.0288	49.2671	62.8366	49.1779	70.5744	60.6819	59.9279	68.8729
Mrpl53	68499	chr6:83109108-83109932:+	72.708	78.9006	83.5508	70.3682	65.0795	60.1653	78.7774	55.2212	87.939	87.8849	57.2098	77.9264
Pxmp4	59038	chr2:154587044-154603673:-	72.6562	84.2798	85.2379	68.6123	88.6228	131.042	98.3437	98.5751	70.4343	73.1472	90.3092	83.6252
Maged1	94275	chrX:94535474-94542074:-	72.5536	81.675	74.8126	70.3155	66.8993	68.052	66.3208	65.1474	72.9265	69.6671	72.069	65.5227
Bhlhe40	20893	chr6:108660629-108666925:+	72.5489	87.3121	64.2768	56.4112	33.9585	18.2542	42.2619	19.1757	84.0689	65.0612	140.115	88.8623
Anxa7	11750	chr14:20455261-20480133:-	72.5275	81.5478	76.2525	71.209	54.5755	45.3854	66.9751	39.577	64.2507	62.9841	70.0453	75.8852
Sec62	69276	chr3:30792876-30821263:+	72.4534	69.7923	64.323	64.9131	55.7182	44.1622	62.0852	49.359	66.6749	59.6335	48.6471	70.4571
Snrpb	20638	chr2:130171636-130179364:-	72.3971	77.094	85.3455	77.3987	65.7461	46.5243	72.3164	47.9072	81.3514	69.8146	58.3879	73.4053
F11	109821	chr8:45241168-45262031:-	72.3349	61.4837	44.9788	55.4962	82.6612	194.799	67.9978	177.953	49.1285	43.7068	125.344	70.607
Cisd3	217149	chr11:97685952-97688625:+	72.2772	82.8217	78.1265	70.7497	50.4828	40.1243	69.5367	45.9583	76.3668	78.7334	43.3662	72.6731
Fdft1	14137	chr14:63145151-63179578:-	72.1865	80.3149	92.1916	72.1386	96.7646	88.8479	83.4891	66.9429	60.5884	40.527	52.1511	56.774
Chmp5	76959	chr4:40948553-40965302:+	72.1091	76.4721	72.2093	74.4904	61.7805	66.3193	63.6368	60.3763	65.4278	62.863	71.1593	67.8275
Sppl2a	66552	chr2:126890395-126933235:-	72.1063	71.1322	60.8001	84.2569	72.839	77.3154	63.5722	83.1419	71.3727	63.8056	81.2656	79.163
Srp14	20813	chr2:118475843-118479696:-	72.0633	76.3704	85.8087	72.0636	65.7665	72.6368	78.0951	56.1759	88.652	83.0475	67.7928	73.5825
Strap	20901	chr6:137735082-137751930:+	71.9428	73.2357	70.5363	75.0096	61.9461	40.2417	67.936	42.3739	69.2526	60.1756	51.4032	68.2232
Eif3d	55944	chr15:77958998-77970824:-	71.8649	70.0053	79.1886	65.8321	49.7969	49.6831	58.0411	42.4076	68.8494	65.3541	65.756	66.8762
Abhd17a	216169	chr10:80583649-80590341:-	71.8495	85.585	83.1539	74.1396	61.6974	48.4709	68.529	47.0408	73.8525	67.9361	45.1801	70.4897
Mrpl38	60441	chr11:116131817-116138868:-	71.8171	80.7866	82.3469	78.406	50.8378	41.1625	63.2443	36.5173	70.8415	71.0519	45.8587	69.16
Mrpl13	68537	chr15:55534095-55557312:-	71.762	74.3604	79.5187	68.5303	57.8918	49.6763	69.9658	42.1732	72.4221	76.9051	50.2656	69.6591
Psmd14	59029	chr2:61711694-61800376:+	71.7454	60.3477	66.0057	59.9625	48.969	35.111	54.1258	32.0674	66.1289	53.298	45.0951	69.5714
Cnih1	12793	chr14:46775568-46788357:-	71.5772	68.7631	68.1224	60.2111	56.2128	47.9553	67.492	49.1711	74.9551	67.7298	51.1529	71.0666
Mknk2	17347	chr10:80665318-80676293:-	71.5042	93.7111	74.4975	91.5572	57.1137	40.8477	92.394	36.8362	103.931	99.0581	51.6522	116.609
Tmed7	66676	chr18:46585928-46597535:-	71.3997	68.4933	64.401	66.8401	75.3392	92.528	68.311	80.0347	74.1208	67.979	87.9753	79.2863
Tomm70a	28185	chr16:57121714-57154530:+	71.1351	81.0477	69.3398	74.9532	66.0878	42.6133	71.9303	47.0588	66.9862	59.8205	46.1528	81.8758
Cdk5rap3	80280	chr11:96907425-96916514:-	71.1059	69.8436	77.3394	60.7961	68.3062	82.7841	59.4994	74.3956	69.9993	72.0973	68.8177	64.5258
Suds3	71954	chr5:117091678-117115993:-	71.0116	80.6007	74.221	74.5621	54.3553	36.1576	59.6071	37.5178	62.6831	62.0897	41.4336	67.7657
Mrps18c	68735	chr5:100798759-100804467:+	70.9724	73.2882	72.5968	71.0974	47.3248	41.529	64.0097	42.0328	69.0449	74.8911	51.9438	61.9617
Slc35d1	242585	chr4:103170651-103215176:-	70.9485	83.3562	71.5988	83.0132	66.1497	32.9839	61.1812	42.9532	75.1916	75.5205	44.657	79.5763
Prg4	96875	chr1:150449412-150466165:-	70.9389	75.6131	61.4563	66.0138	75.0922	38.8063	73.8565	76.8964	92.4756	124.727	56.8486	112.281
Cd82	12521	chr2:93419102-93462950:-	70.8897	73.9202	66.7303	60.3017	47.2051	33.6368	53.8827	35.7207	60.2511	56.8163	37.875	56.0365
Clpx	270166	chr9:65294260-65330658:+	70.8742	65.7351	62.2008	62.8019	78.2532	104.176	88.7544	81.6744	52.965	49.5529	82.4278	60.6473
Phlda1	21664	chr10:111506286-111508649:+	70.8204	60.7409	60.8797	76.4071	58.9555	18.5289	92.4194	29.5893	56.0005	33.8448	14.1384	71.213
Abhd3	106861	chr18:10644411-10706696:-	70.7534	74.0181	56.4379	55.6109	44.8972	23.9804	51.9614	32.6442	57.5464	51.8918	20.1231	68.502
Cpox	12892	chr16:58670208-58680389:+	70.5778	87.6857	73.0044	54.8782	83.6939	79.8631	98.2239	93.0349	75.7117	62.202	49.2619	97.6108
B4galnt1	14421	chr10:127165156-127172340:+	70.5367	67.3483	71.8985	71.068	84.4489	69.385	76.7069	74.3986	91.9834	91.7625	59.9285	74.8825
Fahd1	68636	chr17:24848896-24850302:-	70.5286	68.5941	83.6546	79.9906	56.2533	22.4981	60.8793	38.3143	57.5263	53.615	20.7793	50.0129
Plpp3	67916	chr4:105157347-105232767:+	70.5233	86.1847	64.1964	55.5197	58.7681	40.3748	67.6077	46.5828	52.8784	50.3954	31.4038	59.4255
Mrps16	66242	chr14:20391231-20393555:-	70.5009	70.2229	89.0756	68.5709	48.5621	42.1302	57.0963	36.0774	69.0358	70.33	31.7218	63.6267
Txnl1	53382	chr18:63662801-63692359:-	70.4616	63.5663	74.5317	70.0629	53.6276	46.61	57.2456	43.3994	65.7447	58.5725	63.4797	69.8939
Hnrnpc	15381	chr14:52073380-52104028:-	70.4176	64.4662	71.8392	65.3077	54.8054	34.4699	68.259	42.3856	74.995	60.7823	34.8843	71.4041
Map1lc3a	66734	chr2:155276364-155278073:+	70.4129	90.4541	80.7107	67.5222	53.5673	44.7703	67.4725	38.2342	69.7522	76.538	47.2173	69.5948
Zdhhc9	208884	chrX:48171971-48208702:-	70.3735	77.4132	67.839	71.044	64.8709	44.3488	64.9708	54.8618	65.1241	59.7689	38.7246	73.8907
Emc10	69683	chr7:44489938-44496513:-	70.3332	80.1084	79.0182	75.4023	68.9121	51.1263	75.2856	51.8381	73.7311	68.4843	48.4422	70.5333
Mia3	338366	chr1:183326236-183369565:-	70.2999	71.8578	65.8275	73.0038	67.7567	48.6549	66.3196	58.5139	62.5098	51.1326	52.905	75.8517
Aurkaip1	66077	chr4:155831269-155833098:+	70.1675	76.6246	81.32	70.2256	52.6084	48.8473	59.3451	39.8037	74.6247	70.0173	41.3206	62.5267
Slc16a2	20502	chrX:103697414-103821988:-	70.0807	81.3811	63.6539	58.2829	57.9559	34.7866	57.4326	40.4761	60.9102	54.8986	33.7081	71.8811
Cs	12974	chr10:128337727-128362482:+	70.0504	66.8198	62.9209	54.2932	53.245	38.6618	67.3084	41.1734	54.8927	45.989	43.0165	54.3824
Etnppl	71760	chr3:130617448-130635750:+	69.9841	66.2736	58.3108	164.182	13.9665	2.48832	19.6925	5.40921	55.4507	26.2175	5.76593	51.3338
Creld2	76737	chr15:88819646-88826681:+	69.9475	57.7558	79.5085	47.5971	124.532	306.705	75.0486	211.434	80.8963	134.48	234.813	66.1692
Ebpl	68177	chr14:61339763-61360445:-	69.8786	74.7789	79.1855	57.3762	54.8911	35.8524	59.7616	45.6832	67.0324	75.0058	26.4829	59.3509
8430408G22Rik	213393	chr6:116650684-116652847:+	69.8239	56.683	144.667	76.9777	74.414	52.3593	55.1407	61.2439	39.3289	29.7589	39.8654	86.486
Eif3k	73830	chr7:28971372-28981888:-	69.8196	81.0484	82.8731	78.7986	60.9622	51.0084	73.0958	50.4766	81.2081	82.0561	59.357	74.8168
Degs1	13244	chr1:182275770-182282759:-	69.7318	67.7558	66.4269	89.7419	54.5426	33.6624	61.4039	43.2159	68.5655	58.1826	34.5934	64.1843
Atp6v0e	11974	chr17:26676396-26699646:+	69.7297	71.3137	78.1244	73.3085	73.4296	89.1699	83.9077	68.6645	86.2714	81.8813	92.4298	74.5493
Gnai2	14678	chr9:107614138-107635342:-	69.7007	75.8849	76.9648	65.553	67.0933	66.8738	79.6628	56.4975	78.3838	79.5743	80.7194	67.6626
Hax1	23897	chr3:89995446-89998716:-	69.7001	70.116	74.5001	68.5346	61.2174	60.9117	65.6451	52.3751	75.8973	73.0034	71.5359	66.1713
Nr0b2	23957	chr4:133553376-133556686:+	69.6824	56.0443	106.737	27.9254	58.1431	26.976	43.2544	30.3695	80.3495	128.179	22.1548	91.1342
Ptp4a2	19244	chr4:129820479-129850003:+	69.5924	74.9593	70.4487	66.2042	53.818	34.2355	62.7335	38.9364	64.6111	57.9425	48.9836	65.0668
Gpam	14732	chr19:55067636-55127238:-	69.5526	78.5585	72.5091	84.8801	49.703	46.2502	51.0796	43.6069	49.3276	33.8803	49.6717	56.8321
Dus1l	68730	chr11:120789202-120796395:-	69.4273	77.7295	82.9559	62.6836	55.7052	44.8514	56.4845	44.5335	72.0815	70.3117	49.7165	68.18
Mvb12a	73711	chr8:71542930-71548026:+	69.427	73.8919	82.9155	69.9464	56.7341	51.1442	61.292	46.3387	69.858	68.2558	48.3216	66.8602
Ube2r2	67615	chr4:41136021-41193370:+	69.3902	72.9578	63.6645	65.5334	53.8294	30.0202	64.92	37.6911	61.3602	57.2014	30.2201	61.6608
Mbd3	17192	chr10:80392539-80399531:-	69.3001	75.9852	82.7099	70.0667	62.2246	50.6699	61.4383	51.4119	66.4086	72.1235	52.3951	58.9288
Bud31	231889	chr5:145140376-145148078:+	68.9999	61.1061	65.7211	61.3163	54.5469	44.8841	59.9016	45.4239	80.168	72.7198	56.5184	68.5819
Mrpl24	67707	chr3:87919544-87923433:+	68.9997	70.1795	76.7379	70.661	52.2752	56.9402	58.8192	49.4895	68.8743	71.7873	61.7541	65.7542
Acnat1	230161	chr4:49443532-49451109:-	68.9442	58.5779	62.8675	40.9037	72.7184	57.7214	62.709	61.0814	68.2248	58.1081	38.3243	62.7418
Edem2	108687	chr2:155701673-155729475:-	68.925	65.8838	76.085	63.188	78.5024	155.588	68.0158	118.181	62.8136	67.2948	151.272	61.3498
Use1	67023	chr8:71366848-71369732:+	68.7848	71.2453	81.3899	71.0367	59.3159	47.3611	64.3081	46.9247	78.4273	74.2825	51.3837	66.9703
Insig2	72999	chr1:121304353-121332589:-	68.7328	60.154	70.3172	56.1309	67.4821	163.461	98.9589	96.4633	57.1924	43.7688	82.9808	58.0841
Habp4	56541	chr13:64161866-64186537:+	68.6952	73.3879	70.5679	72.6535	49.0325	35.5276	51.9126	36.5122	56.8414	55.8305	30.9189	73.87
Tomm6	66119	chr17:47686645-47688386:-	68.6753	72.8169	83.8814	67.7871	51.5527	50.8218	62.9529	47.3826	62.6514	75.522	49.9145	62.5367
Fam210b	67017	chr2:172345577-172355749:+	68.6607	79.8485	72.8245	75.741	98.0369	113.764	92.5468	110.945	70.849	57.7495	88.2356	76.6286
Cox19	68033	chr5:139337822-139345166:-	68.6	73.9909	77.003	60.2795	50.5989	36.5571	68.826	42.6642	69.6838	70.7941	50.3017	64.9956
Adhfe1	76187	chr1:9547948-9577970:+	68.4633	64.6355	57.2303	60.3653	39.2625	27.5141	46.4148	25.8435	48.7565	48.2307	15.0612	64.0751
Slco2b1	101488	chr7:99657804-99711340:-	68.4202	73.2067	66.6143	61.5668	48.0905	24.9934	53.2941	35.5477	62.0966	55.371	19.2739	76.2622
Mrpl2	27398	chr17:46646221-46650132:+	68.2928	80.432	75.9669	68.1229	49.4004	40.5998	63.1789	37.4068	65.5946	64.0909	39.9693	64.1073
Ppm1a	19042	chr12:72761211-72794940:+	68.2832	84.3918	71.0216	74.1521	63.3677	44.8495	70.7737	45.3692	64.4187	58.3466	48.5734	66.8931
Fam120a	218236	chr13:48879217-48967828:-	68.2807	70.6637	63.1215	66.8286	55.531	37.2014	57.0955	41.2437	62.2942	54.4478	40.1943	69.2863
Cdhr5	72040	chr7:141269085-141276786:-	68.2449	74.0218	68.6164	73.0222	60.7218	58.7444	63.6966	56.7518	64.0186	65.0053	56.4721	69.8732
Tmem120a	215210	chr5:135735490-135744172:-	68.1985	94.9755	81.362	75.8573	80.0289	100.44	91.2695	66.1486	84.5117	92.1934	73.3018	108.576
Slc2a2	20526	chr3:28697903-28728360:+	68.1772	129.136	107.418	36.082	33.1936	10.4179	56.9068	21.6911	65.5135	60.0917	6.6275	96.3033
Pex7	18634	chr10:19860090-19907674:-	68.1158	75.5471	70.6522	72.371	54.1111	32.4324	66.8446	39.3518	67.5119	54.1326	32.9819	67.7104
Ran	19384	chr5:129020156-129024321:+	67.9583	66.2124	71.3878	64.3107	53.455	43.9128	61.7539	37.1566	70.6095	61.8061	56.4849	65.7172
Tmed4	103694	chr11:6270714-6274837:-	67.806	79.7432	78.6682	64.0381	71.1907	97.8714	75.9325	86.8731	76.3311	69.3689	111.219	66.9949
Isyna1	71780	chr8:70594481-70597290:+	67.7426	97.422	62.3944	35.233	95.8813	48.3669	54.3207	70.5471	82.847	139.572	80.4171	81.252
Cct7	12468	chr6:85451505-85468477:+	67.7262	66.2104	71.593	64.6083	53.8953	43.4781	58.0916	39.6404	71.737	60.1275	53.2441	72.1096
Zdhhc6	66980	chr19:55298296-55316032:-	67.601	70.5022	72.099	67.1524	62.0715	50.0162	68.2446	50.9677	68.5937	70.1255	51.6658	74.4878
Snd1	56463	chr6:28480348-28888832:+	67.5964	66.4397	76.2827	77.0488	69.2029	78.0142	56.1343	69.4734	70.8911	60.7422	81.6575	75.8025
Oplah	75475	chr15:76296603-76307245:-	67.5626	92.5819	77.0528	69.0808	75.7781	54.1987	92.5483	63.5397	79.6056	76.0528	56.0399	100.442
Eif3b	27979	chr5:140419305-140443358:+	67.4958	66.5391	73.6166	70.3914	62.7223	59.9685	61.1952	54.6409	75.4116	69.0728	69.7257	73.99
Tex264	21767	chr9:106658746-106685952:-	67.4874	77.8064	75.8416	63.1748	51.7072	35.568	60.2988	40.2681	64.8112	75.7792	34.4686	66.0056
Ceacam1	26365	chr7:25461702-25477625:-	67.4778	69.738	58.9494	70.5504	64.4532	58.7318	62.3195	63.2926	64.2298	54.327	43.0526	71.5531
Ppp2r5a	226849	chr1:191351981-191397041:-	67.3891	81.5604	62.0641	73.4079	61.9793	37.8936	54.2896	41.1664	59.4528	44.3486	37.1187	63.2429
Prpsap1	67763	chr11:116470816-116490346:-	67.257	77.4715	70.9617	63.2389	58.9466	42.1779	60.0096	46.2397	59.2436	56.333	39.3631	66.0937
Rnf149	67702	chr1:39551296-39577347:-	67.2409	64.6902	58.391	69.9664	65.6898	74.9951	64.7448	59.2011	64.2941	53.0763	59.6798	79.5039
Grsf1	231413	chr5:88659233-88676171:-	67.1863	71.5977	69.7265	69.2597	47.1832	33.278	52.8892	35.6034	63.0555	49.5077	38.9196	70.0705
Grpel1	17713	chr5:36465185-36474077:+	67.1644	72.0232	72.3516	59.6768	49.1548	45.9745	54.5816	39.7425	59.6961	60.9702	45.24	62.8036
Ik	24010	chr18:36744656-36757639:+	67.04	64.3085	67.294	68.3161	57.1606	61.0262	60.0939	55.3121	71.216	67.2163	74.5353	65.3679
Bcl3	12051	chr7:19808462-19822755:-	66.9541	62.4809	40.8525	42.5098	79.3695	53.6516	63.6654	59.5345	36.6806	49.0438	80.2376	61.1341
Ypel3	66090	chr7:126776975-126780514:+	66.815	69.9746	68.6208	62.0706	50.6138	29.267	59.6797	35.8752	56.2777	62.8887	23.8879	57.6862
Lyz2	17105	chr10:117277541-117282272:-	66.775	44.352	89.9176	50.8565	65.1684	19.0637	76.9557	27.1749	57.2929	79.9116	12.0026	46.5532
Chmp1a	234852	chr8:123204261-123212788:-	66.7147	74.921	70.9442	65.9359	55.9884	42.6182	64.0459	42.1375	71.8137	69.919	46.2038	71.6369
Pgls	66171	chr8:71592184-71596267:+	66.6511	72.7453	81.5499	63.4185	55.6866	50.9638	60.5761	48.9352	64.4624	69.6946	45.4409	58.6052
Snrpe	20643	chr1:133603871-133610280:-	66.6217	61.3137	76.2472	67.647	48.2867	39.1136	57.1003	37.63	60.8177	63.9274	43.0064	56.7435
Apol9a	223672	chr15:77403789-77411080:-	66.5666	51.1186	53.2989	60.0999	16.3017	4.29959	17.422	6.62053	51.0016	42.2162	11.2188	68.6018
Malat1	72289	chr19:5795690-5802672:-	66.5317	62.0046	63.2758	50.9543	51.158	41.3173	57.2635	32.7317	53.0469	33.8073	34.8335	53.3519
Mrpl28	68611	chr17:26123503-26126613:+	66.4847	71.0522	73.8759	65.1234	46.0305	33.52	57.7142	36.4936	65.8825	67.3137	34.2945	65.9537
Emc4	68032	chr2:112363019-112368027:-	66.4674	64.7018	65.46	57.604	48.7754	40.4043	53.8608	39.6528	59.4485	58.784	44.9792	62.8894
Myo1b	17912	chr1:51749758-51915978:-	66.3822	62.1604	49.8506	63.5373	63.8735	51.9241	62.6015	59.2698	67.9004	46.2459	44.5589	60.8254
Nsmf	56876	chr2:25054379-25062881:+	66.3804	70.0112	67.7181	52.4497	58.1947	43.2959	50.09	40.7608	63.8915	56.372	44.8247	62.6115
Cldn2	12738	chrX:139800808-139811388:+	66.0772	68.0751	57.9948	67.3635	76.4333	101.334	75.384	76.1246	66.2411	59.7272	181.851	60.2467
Clpp	53895	chr17:56990264-56996371:+	65.9959	66.7038	78.0651	59.1852	49.6061	54.4161	60.166	47.4262	67.3811	67.9448	58.8467	59.7787
2810459M11Rik	72792	chr1:86045863-86055456:+	65.977	68.7631	65.9278	66.047	63.9878	33.2608	54.8479	47.6114	62.9393	56.1374	26.2522	68.2552
Tmem126a	66271	chr7:90450712-90457208:-	65.9	70.4479	66.8043	64.2452	46.4396	41.8709	52.6759	39.2756	66.8563	55.8967	42.4659	59.4123
Nmt1	18107	chr11:103028562-103066105:+	65.8246	61.2699	65.9558	60.2207	58.7461	56.1815	58.067	47.4017	59.7869	55.3474	60.0919	63.4272
Gm8883	667931	chr1:71888112-71891204:+	65.732	62.7582	55.2212	51.0877	70.5591	105.305	64.5091	83.0284	48.4098	61.6714	101.411	57.6718
Me1	17436	chr9:86581363-86695914:-	65.6963	71.1854	54.3552	50.777	37.343	40.2128	47.7906	32.9579	38.2513	35.2747	58.3801	44.6727
Gss	14854	chr2:155563181-155592810:-	65.6069	69.5949	70.5415	89.0407	65.5282	47.3826	61.1743	45.1461	68.776	63.1201	65.8591	71.8569
Retreg3	67998	chr11:101096322-101119843:-	65.5911	72.9207	63.9133	60.9002	54.1172	36.2962	60.0392	37.9448	69.1874	62.8053	38.4412	71.0078
Gstt2	14872	chr10:75831845-75834881:-	65.5897	72.2319	106.405	55.8195	40.8292	30.6379	58.3351	30.2074	40.6027	50.3997	15.6048	52.8989
Immt	76614	chr6:71831320-71875266:+	65.5527	73.2144	69.8726	66.0814	50.5496	41.4658	63.7271	39.9619	62.9797	53.91	48.3982	66.8097
Tars	110960	chr15:11383663-11399658:-	65.4743	64.0244	68.3148	75.5072	68.4763	52.9544	59.139	52.7279	59.2933	49.0323	62.5839	65.6495
Capza2	12343	chr6:17637098-17666536:+	65.3381	68.7119	58.6637	73.2356	56.8366	52.8022	70.6822	49.6614	61.345	57.1308	66.5111	68.425
Rab43	69834	chr6:87788853-87812164:-	65.31	84.4684	77.2948	50.5799	49.9173	31.9266	54.4718	31.6972	55.8914	53.1364	30.6238	83.1575
Fggy	75578	chr4:95557507-95926939:+	65.3024	62.057	54.3814	61.7623	41.4826	17.7073	41.2004	24.3863	51.7489	42.8178	13.1388	53.7073
Snf8	27681	chr11:96034885-96047430:+	65.2946	69.9385	74.7283	61.6105	49.7036	41.8762	57.2887	39.6599	68.4631	71.4035	38.7829	58.9779
Smlr1	100504474	chr10:25527943-25536272:-	65.2134	67.3625	77.5105	62.7	64.9009	34.0345	69.6054	40.4962	53.6401	51.3134	55.2315	55.4172
Atg3	67841	chr16:45158829-45188538:+	65.2069	62.8288	61.3476	64.8567	42.6073	21.9252	46.6339	29.7556	61.425	50.2916	27.8483	59.623
Gnpnat1	54342	chr14:45376421-45388796:-	65.128	56.4622	55.7446	65.6197	48.1779	35.4395	52.3843	40.4745	60.0189	53.4124	38.6363	62.7088
Gm20319	100504628	chr16:26714682-26755502:-	65.1156	64.5824	61.9048	46.1185	38.9835	20.3043	43.466	22.8133	47.1946	48.4916	12.7837	52.4156
Gna12	14673	chr5:140759944-140830431:-	65.1121	92.3453	63.7793	63.9709	86.6074	62.6035	80.845	71.9037	73.7804	59.9272	53.0053	113.341
Mtx2	53375	chr2:74825812-74876748:+	64.9302	67.6046	61.5414	64.7054	50.4261	36.0814	56.0848	33.3837	62.8436	51.3709	42.2934	62.3206
Klf15	66277	chr6:90462576-90479686:+	64.7556	67.9453	63.703	66.6802	43.2552	20.7695	50.1292	32.2737	87.9834	77.3647	18.7251	77.44
Eif6	16418	chr2:155819837-155826925:-	64.7214	76.4179	73.2994	69.3137	68.805	82.9695	70.2226	73.3473	78.9309	79.4279	131.96	70.774
Babam1	68251	chr8:71396855-71404772:+	64.6885	66.5125	70.0589	64.5059	49.4794	45.1105	59.1679	43.1825	63.2766	61.9705	41.8857	62.338
Slc25a42	73095	chr8:70184340-70212281:-	64.6494	73.463	58.557	60.5392	53.0482	34.8621	59.8114	43.6034	51.7295	47.4283	32.495	71.8172
Slc25a11	67863	chr11:70644027-70647039:-	64.6483	69.3842	69.5037	57.6527	46.6727	37.953	57.522	35.3314	64.4191	55.9177	35.2651	61.787
Prkar1a	19084	chr11:109649405-109669663:+	64.5146	66.3842	64.509	76.0534	54.9932	56.1982	62.9816	50.6627	65.0654	57.9399	75.2192	68.3093
Lpin2	64898	chr17:71183978-71249818:+	64.4612	72.944	86.1541	106.272	53.4456	43.6905	74.6764	39.7051	78.1367	57.7139	28.3007	79.9891
Tsc22d3	14605	chrX:140539529-140600522:-	64.4128	85.1522	49.6788	45.0246	48.6561	27.0682	51.6768	29.9202	119.299	128.683	20.192	83.8143
Brap	72399	chr5:121660563-121687249:+	64.3817	70.4014	64.4889	74.1524	44.1606	30.0498	55.7463	30.0566	55.6975	50.0203	39.6684	77.8814
Rab18	19330	chr18:6765167-6791606:+	64.3698	66.5559	57.3273	65.7689	52.8858	51.4991	59.0605	49.7391	65.9458	61.4136	66.4669	69.2871
Prtn3	19152	chr10:79879667-79883172:+	64.3355	53.4782	33.2231	51.7497	37.7528	2.94711	20.9171	8.4907	59.3535	79.5427	2.53435	47.7059
Sec63	140740	chr10:42761496-42832514:+	64.2132	63.3832	57.9232	66.629	63.5232	60.5001	57.3802	61.0134	60.3127	53.4154	62.2382	63.7921
Rab8a	17274	chr8:72161200-72181366:+	64.1955	67.6214	70.8257	62.5763	57.2475	46.7485	58.3156	49.9331	68.6173	71.689	48.6332	66.0836
Slc6a12	14411	chr6:121343076-121365773:+	64.1881	55.1621	57.2622	60.8417	55.2629	40.1728	46.0812	40.8448	58.7996	49.0163	27.6969	58.7493
Arpc5	67771	chr1:152766542-152775580:+	64.1727	68.1212	69.5451	69.8903	57.5153	56.2351	67.489	56.8352	71.4426	68.0687	69.7472	68.7121
Mmadhc	109129	chr2:50279881-50296801:-	64.1425	74.3791	77.7204	60.6057	58.7204	85.5413	77.8427	68.7412	60.1853	66.1432	104.056	67.5333
Cyp3a59	100041449	chr5:146079258-146113283:+	64.0767	30.4413	82.6413	39.2806	16.2185	4.22465	14.8263	3.647	24.6694	11.9046	1.84651	20.6187
Nr1d1	217166	chr11:98767932-98775377:-	64.0743	52.7995	63.1016	72.8753	49.1279	24.8133	61.9249	35.7931	49.1559	34.3698	20.3378	43.7991
Sar1a	20224	chr10:61680321-61693297:+	64.0237	70.3248	65.5306	71.2344	58.405	57.6658	63.546	54.594	68.1253	70.1655	66.236	68.7365
Trpc4ap	56407	chr2:155634277-155692384:-	64.0066	65.0422	64.261	61.6046	55.8792	44.7604	56.9424	44.6962	64.5015	55.1681	47.9618	70.6155
Ppp1r3b	244416	chr8:35375741-35388137:+	64.0018	101.358	71.8339	49.5507	68.4258	22.5418	59.7439	36.5901	128.522	106.902	29.9143	94.0302
Zcchc24	71918	chr14:25711640-25768856:-	63.9828	68.8468	60.18	63.0737	51.6491	34.886	52.4828	42.831	59.3884	55.5891	36.1825	72.4807
Alad	17025	chr4:62505984-62520063:-	63.9537	74.0372	65.0217	48.9822	41.8723	19.2458	44.7468	27.5903	54.3693	51.7371	16.2676	49.4426
Hyi	68180	chr4:118359999-118362744:+	63.9215	77.1221	81.4787	56.8075	35.6169	14.9678	54.2233	24.8914	55.2448	50.0322	13.0228	50.5376
Hmbs	15288	chr9:44336348-44344228:-	63.7791	68.0968	68.9965	57.9808	50.7469	49.7633	53.1673	45.3644	55.8566	56.3606	49.4703	57.4633
Kynu	70789	chr2:43555325-43683048:+	63.7211	54.2567	47.4746	74.0836	38.9238	24.9376	39.1052	29.9378	53.3508	39.7356	21.4898	60.6714
Lgals3bp	19039	chr11:118392752-118401931:-	63.6587	64.0953	71.3907	48.5798	74.1747	54.255	69.5973	50.6099	75.865	70.5258	75.304	75.7639
Naxd	69225	chr8:11497506-11513286:+	63.65	65.7771	69.1479	59.8292	51.2828	39.1831	57.1215	40.2164	62.3934	65.4968	34.346	57.5449
Sel1l	20338	chr12:91806043-91849157:-	63.6484	65.3943	61.3637	61.5702	83.3004	96.2416	59.8065	96.7833	56.4179	53.8246	70.9555	64.9129
Mrpl51	66493	chr6:125192200-125194392:+	63.6195	64.276	67.2631	60.4134	50.3348	43.6754	63.9931	44.7483	64.736	67.107	46.3616	59.9107
Guk1	14923	chr11:59183855-59191952:-	63.594	72.6927	78.2765	60.9995	55.6819	74.8753	64.9602	66.3897	52.6909	57.4322	64.4387	51.2941
Ccdc47	67163	chr11:106199356-106216367:-	63.4848	62.1365	57.7806	61.8931	52.0412	46.7886	56.0177	44.8427	61.1734	55.4526	57.5733	68.9469
Hint3	66847	chr10:30608207-30618366:-	63.4754	56.3012	64.0275	61.7405	46.2341	43.778	49.2019	43.128	49.6131	49.2501	38.0329	53.1161
Prr13	66151	chr15:102459170-102462806:+	63.4718	61.3221	67.1931	61.3772	44.7293	36.5924	54.3454	37.5498	59.4676	62.8298	38.1836	58.3456
Mir22hg	100042498	chr11:75461539-75466690:+	63.454	49.2254	54.6023	54.5547	39.5745	20.6093	39.0419	24.0119	48.993	41.1506	29.9535	49.4106
Churc1	211151	chr12:76765573-76783178:+	63.3858	60.1272	65.1093	60.3946	49.5714	47.9013	56.5361	43.7795	62.1648	59.796	46.7153	57.7544
Pex19	19298	chr1:172126755-172136497:+	63.3639	78.0055	72.2298	53.8315	54.4387	48.925	71.136	48.1744	63.0416	52.0127	46.1139	68.0143
Ndufs4	17993	chr13:114287795-114388094:-	63.2226	67.001	66.1427	62.5913	48.892	42.0436	55.1209	37.1833	61.8609	57.1053	41.5806	56.0939
C730036E19Rik	402734	chr1:151138034-151144095:+	63.1874	80.5269	50.9737	42.7143	35.5671	2.40337	42.4613	9.51376	59.8672	55.7759	1.57969	77.9357
Lpcat3	14792	chr6:124663104-124704716:+	63.135	78.2068	73.332	79.945	50.1891	41.2159	54.8575	38.685	46.7478	43.5561	36.1962	56.0202
Fam136a	66488	chr6:86365683-86370058:+	63.0971	63.2674	69.017	58.081	48.4741	30.2601	50.6775	32.8886	56.6626	54.2774	32.555	62.2311
Morf4l2	56397	chrX:136732948-136743686:-	62.9692	63.3465	73.1958	64.1878	70.8745	92.4689	65.3764	75.2293	79.6948	74.7071	107.463	71.8095
Sec13	110379	chr6:113728052-113740681:-	62.8995	68.4252	71.5055	62.5668	65.1521	73.4757	60.5822	68.0136	75.2846	73.8957	84.7942	68.5405
Tex2	21763	chr11:106502139-106612930:-	62.895	61.8553	62.5729	56.3578	55.0494	42.5936	55.2392	43.9082	60.2711	52.6296	42.9926	65.79
Hopx	74318	chr5:77086986-77115123:-	62.8366	50.7879	63.6509	33.5332	59.6029	68.8931	67.1234	62.6116	59.4053	70.4617	42.7067	48.3321
Vti1b	53612	chr12:79156017-79172458:-	62.8275	69.5333	69.0351	66.4494	51.2215	41.0943	58.5179	41.4984	61.6646	62.1975	47.3941	59.1616
Thoc7	66231	chr14:13949012-13961313:-	62.8028	62.1564	60.5468	61.1991	44.0524	32.308	53.1981	37.6921	59.411	60.7873	41.9355	58.3417
Tm9sf3	107358	chr19:41210842-41264004:-	62.7374	65.2384	56.2731	66.2073	60.2784	63.4713	58.7101	66.6147	56.8362	51.8118	70.6136	63.6459
Pa2g4	18813	chr10:128557766-128565934:-	62.7317	61.3491	66.048	62.3035	47.8262	41.1121	53.2277	45.256	70.6455	63.8804	60.5231	70.108
Carhsp1	52502	chr16:8658587-8672153:-	62.7117	73.7968	64.4667	55.5861	46.9293	46.3523	54.7337	42.2874	55.726	54.9401	64.8849	60.6295
Mavs	228607	chr2:131234063-131248024:+	62.5878	63.5959	59.3304	67.0483	52.1084	28.7293	49.3588	36.9891	67.0038	52.1261	35.3777	66.4975
Nono	53610	chrX:101429651-101448593:+	62.5764	64.9139	63.8349	68.1818	49.5393	35.0881	53.3254	35.3016	61.7777	53.2163	40.0388	65.2372
Pros1	19128	chr16:62854307-62929342:+	62.5017	57.2586	42.1078	73.9389	69.676	61.9254	58.7473	51.5807	59.1427	51.8219	57.9904	65.6327
Sptssa	104725	chr12:54645374-54656572:-	62.4596	58.8824	48.7653	75.2232	49.7692	53.9173	53.8523	44.0456	53.145	47.9544	53.6897	53.8721
Pnpla8	67452	chr12:44269154-44313435:+	62.4203	69.2496	57.1969	62.7081	55.067	49.4117	65.4165	49.0248	51.4808	44.9428	59.1694	68.7904
Scap	235623	chr9:110333288-110384949:+	62.3947	64.5276	63.5735	70.6216	57.1136	38.0654	53.5263	39.4776	52.8129	43.9238	32.8318	63.992
Irgm1	15944	chr11:48865245-48871420:-	62.3807	52.5262	50.3265	51.8433	48.9707	22.8381	44.7291	29.323	63.1897	49.4374	42.5655	64.6242
St3gal3	20441	chr4:117932153-118134946:-	62.3712	68.5157	65.3576	67.407	57.5115	39.0359	57.9879	46.2566	60.8476	64.589	42.6689	63.3724
Drg1	13494	chr11:3249922-3266386:-	62.3578	59.5163	58.6883	60.344	43.5217	40.947	52.2897	39.3925	61.2446	59.4954	57.869	69.5109
Sec31a	69162	chr5:100361649-100416234:-	62.3399	59.9355	66.3067	60.4504	65.2179	60.1759	52.8093	59.0184	70.3266	62.5345	68.8693	74.0509
1110008P14Rik	73737	chr2:32379101-32381915:-	62.3342	72.5957	69.9359	47.7418	58.8635	41.7072	61.5549	47.2421	69.4519	67.3208	42.3618	59.1795
Ube2l3	22195	chr16:17152015-17201492:-	62.3282	59.8237	58.0932	55.475	44.8385	34.4479	52.3613	36.6549	58.862	59.0757	38.2451	58.56
Tmed10	68581	chr12:85340614-85374717:-	62.1793	64.4111	65.5664	61.9597	68.4107	63.08	65.6796	64.7843	71.3503	67.5454	64.466	67.7885
Paip2	67869	chr18:35598617-35617186:+	62.1345	63.0986	62.4008	60.3913	50.0813	38.1759	57.7306	38.0291	57.6489	52.4997	40.2923	58.8869
Tomm7	66169	chr5:23838944-23844145:-	62.0884	64.5114	64.5315	60.1209	55.9165	50.2341	59.8534	48.8553	59.9325	68.6867	46.0757	54.6008
Yipf3	28064	chr17:46248080-46252537:+	61.9956	62.3499	65.7569	63.6713	55.5299	50.9484	56.7317	50.0377	64.2695	64.9923	52.2253	65.5559
Dera	232449	chr6:137754577-137837872:+	61.9871	64.1486	63.4643	58.8592	42.9669	23.2139	47.9981	29.3151	57.2554	53.4603	20.4149	62.1533
Kif1c	16562	chr11:70700548-70731970:+	61.9769	71.2669	60.9974	67.5518	69.5766	49.8501	70.3357	54.4709	58.7084	53.1384	47.5785	64.6156
Mtfr1l	76824	chr4:134525555-134535387:-	61.9502	67.0246	63.7231	59.5378	47.3487	37.5545	59.3502	36.852	61.9205	59.6358	35.5545	65.6267
Slirp	380773	chr12:87443896-87449924:+	61.9386	57.767	64.7449	51.0826	44.2996	41.2687	51.1628	35.5762	67.386	69.0541	39.7078	52.0258
Tmem106b	71900	chr6:13069759-13089269:+	61.9218	71.1734	51.4963	69.7894	45.227	24.5216	49.6175	30.6532	50.4895	43.7749	29.5641	58.6146
Rab9	56382	chrX:166457252-166479867:-	61.9012	63.9421	64.029	64.6832	45.2562	41.7479	59.7895	42.9643	53.3872	44.3333	43.2923	50.7097
Actn4	60595	chr7:28893254-28962280:-	61.8986	62.937	59.7217	70.0094	77.9282	62.1316	65.9714	68.441	73.4743	55.8369	62.5939	74.4768
Ces2e	234673	chr8:104926260-104934672:+	61.8617	76.2556	66.0906	35.696	29.2164	17.8767	47.4859	21.764	46.0773	34.2088	26.8369	50.4908
5033403H07Rik	75954	chr5:52973012-52992292:-	61.853	55.6374	54.4011	45.4839	36.2139	18.7775	47.9166	23.3044	55.422	37.5763	18.5126	42.9808
Wdtc1	230796	chr4:133292466-133339315:-	61.8378	72.9015	63.6358	63.8532	51.8752	29.9605	58.4824	37.1387	52.7965	50.5862	24.9933	56.6402
Hnrnph1	59013	chr11:50377719-50386528:+	61.6968	54.8482	45.3546	55.3308	53.0051	40.187	52.7506	49.9334	60.4461	57.2908	62.8306	58.5851
Abcg5	27409	chr17:84658174-84683011:-	61.6603	57.6776	57.6688	78.2626	42.8728	16.7153	46.799	22.1334	55.6734	46.5249	21.2119	60.5669
Timm23	53600	chr14:32180166-32201891:-	61.6448	59.0693	59.5297	54.1282	45.9742	45.8428	59.0986	39.3049	60.1036	55.2978	51.3032	62.2034
H2afy	26914	chr13:56073622-56135550:-	61.6347	63.0691	60.8268	62.0198	44.7364	40.1093	49.4593	40.5147	62.3465	57.3908	44.6684	64.3292
Txndc17	52700	chr11:72207554-72210487:+	61.6237	68.1536	67.4693	62.5391	49.897	39.4429	60.6341	42.8354	63.1119	64.3191	43.6861	54.7029
Nsfl1c	386649	chr2:151494182-151511310:+	61.4791	59.9066	66.4155	52.7146	49.1178	39.6011	54.9552	37.1477	59.5348	59.6527	45.553	62.1951
Zbtb8os	67106	chr4:129336026-129347029:+	61.369	68.0194	74.291	60.9612	58.5325	47.011	62.8052	49.6056	64.219	63.1987	53.41	61.6146
Sema4a	20351	chr3:88435962-88461182:-	61.3275	69.9564	51.4634	66.4538	52.1042	35.1552	51.747	40.3975	59.7698	59.756	36.0582	62.5196
Avpi1	69534	chr19:42123275-42128993:-	61.3271	54.8723	59.9113	56.6476	47.2229	39.6485	47.127	35.5673	63.4443	59.2903	31.3048	49.3718
Elovl3	12686	chr19:46131899-46135694:+	61.2747	44.2311	25.1568	23.5976	28.8994	65.4198	46.5637	18.873	34.0945	14.4176	18.55	21.1673
Uqcc2	67267	chr17:27122665-27133891:-	61.2105	63.6688	76.5155	65.8508	40.1279	30.2187	56.5795	27.0537	56.5367	62.3394	28.3067	52.8241
Yif1a	68090	chr19:5088538-5092879:+	61.1909	68.1242	64.8394	54.9973	55.8755	69.8176	63.6447	62.1392	59.1253	65.6682	61.805	61.2204
Sqle	20775	chr15:59315092-59331193:+	61.168	61.7117	70.1344	57.41	127.544	137.85	97.6047	123.698	81.3941	44.4185	139.428	62.9507
Stip1	20867	chr19:7020696-7040026:-	60.9925	50.0186	54.3395	54.8918	52.1962	25.3163	51.3121	32.2319	77.5424	53.5712	32.5856	74.5629
Smoc1	64075	chr12:81026808-81186414:+	60.9536	72.9368	56.8929	57.2773	65.3303	56.8404	70.6551	67.7155	76.9569	80.1791	74.5624	65.8177
Mtus1	102103	chr8:40990912-41133726:-	60.9504	58.8215	51.2574	57.3477	57.4961	33.3288	55.3054	41.15	51.08	44.8046	33.4215	61.4518
Mir682	751556	chr13:75645046-75645141:+	60.9428	64.7574	88.5126	65.5747	58.9213	79.166	72.6816	46.7953	70.3163	78.0676	55.3306	49.7963
Cdc37	12539	chr9:21138541-21149906:-	60.8665	64.7332	67.9141	63.5892	49.4913	37.1049	56.0344	40.0192	64.5903	60.98	40.4489	65.3743
Ddc	13195	chr11:11814101-11898144:-	60.8598	42.5899	69.9325	44.4424	27.1976	15.2532	28.4566	18.4094	40.4234	24.0545	16.7063	25.752
Psmb10	19171	chr8:105935728-105938392:-	60.773	64.9597	59.6713	60.4302	35.6972	26.5172	44.0969	22.1884	63.1186	70.3304	29.4847	54.4042
Pfdn6	14976	chr17:33938909-33940343:-	60.7146	58.5399	70.821	55.7304	44.3471	33.456	51.8417	34.8376	62.7408	69.2052	39.0142	60.9911
Srp72	66661	chr5:76974701-76999935:+	60.6919	58.6743	62.1217	57.8991	59.5428	66.5523	51.6979	59.2863	65.5736	57.4258	72.04	64.3581
Gaa	14387	chr11:119267963-119285458:+	60.5993	64.236	59.3895	62.1808	50.5949	32.8943	58.7176	36.1642	53.169	49.0097	30.5355	56.4722
Atp6ap1	54411	chrX:74297097-74304721:+	60.5809	62.5959	62.6547	67.2692	58.6671	45.9944	63.3305	51.3993	65.115	59.2975	60.8845	64.176
Wdr61	66317	chr9:54717153-54734549:-	60.5801	63.1311	57.5986	68.2716	49.8325	34.4692	50.0772	38.3542	57.2512	50.0765	37.2363	60.004
Optn	71648	chr2:5020642-5064117:-	60.5135	75.7899	64.4655	62.7092	60.1819	48.1268	68.2239	51.5436	57.4162	54.5691	48.818	75.0823
Fbxo21	231670	chr5:117976770-118010197:+	60.4268	56.5924	59.5178	55.9571	48.717	18.2725	41.0616	26.8613	38.8284	37.376	10.9326	52.3916
Chchd1	66121	chr14:20703027-20704425:+	60.3835	65.1731	71.8283	59.1567	42.463	31.288	55.7022	34.0902	62.7256	60.5011	29.733	56.1334
Nat6	56441	chr9:107580669-107584048:+	60.3455	72.7126	63.9081	55.0693	50.4528	34.1412	64.6455	36.6893	69.0642	77.2489	44.9236	62.4636
Slc47a1	67473	chr11:61343400-61378075:-	60.3413	75.6611	59.6685	52.226	31.9417	3.73239	38.358	12.2746	58.5004	47.9501	1.93327	70.7327
Mrpl20	66448	chr4:155802878-155808831:+	60.3372	58.4423	61.1598	51.6887	53.2829	47.2027	55.0037	42.7671	58.1869	59.745	47.4338	55.5603
Cmtm6	67213	chr9:114731203-114749343:+	60.3275	63.483	68.2939	62.6447	51.5245	35.7565	50.6561	40.9167	50.9074	41.1612	34.6265	64.633
Akap1	11640	chr11:88830792-88864586:-	60.2921	70.1777	56.8466	57.772	57.1841	35.7019	62.1706	46.6675	55.1076	49.7757	36.6821	65.0846
Setd3	52690	chr12:108106431-108179284:-	60.2805	62.1577	58.4151	58.2561	53.4777	33.0326	54.7312	37.9421	58.0713	50.6771	33.6046	61.0494
Pls3	102866	chrX:75785653-75875182:-	60.2529	64.7437	50.2975	59.9176	46.7062	42.0608	50.027	44.7933	59.0959	58.0786	58.0115	57.426
Rnf128	66889	chrX:139563340-139673145:+	60.1601	64.5543	57.7831	60.69	51.7576	26.607	57.192	40.0874	56.1388	54.213	26.8803	61.843
Commd1	17846	chr11:22899728-22982284:-	60.152	64.4122	62.8653	59.3581	44.4095	35.7997	53.0311	34.2826	57.1312	55.5726	34.8828	53.4537
Bpnt1	23827	chr1:185332159-185357777:+	60.1395	61.7635	62.0693	57.6797	49.1547	33.1931	52.9489	41.205	65.8948	56.2904	36.101	73.0079
Srrm2	75956	chr17:23803187-23824743:+	60.1361	57.2847	50.2367	63.7347	53.3246	40.5941	48.5249	46.3402	58.6582	43.0726	43.7812	55.4902
Cops5	26754	chr1:10024600-10038159:-	60.126	63.7324	60.6982	65.4118	43.8271	38.8114	50.4708	33.074	59.0474	50.4442	47.7104	64.1425
Mfsd1	66868	chr3:67582768-67604231:+	60.0456	71.1305	55.8195	61.7073	49.7927	31.4672	53.6576	35.7929	56.9956	53.0553	30.558	68.4052
Arpc1a	56443	chr5:145083869-145108756:+	60.0336	67.6748	70.4335	63.9445	53.1397	44.4338	59.2591	49.8064	63.8447	69.2831	48.4322	61.0099
Atp6v1h	108664	chr1:5083086-5162549:+	60.0271	46.9058	53.9113	49.3011	42.5902	29.5728	44.7916	30.7831	52.2594	44.2786	38.6853	55.7062
Mtch1	56462	chr17:29332076-29347932:-	59.9359	65.8561	68.5379	62.2513	46.7226	29.9893	55.2218	33.0536	54.8344	57.7684	29.4613	60.9552
Anks4b	72074	chr7:120173858-120183716:+	59.8944	66.1181	59.2836	62.6147	44.686	22.5659	37.7183	34.67	52.5974	44.1511	24.9119	49.1703
Rmdn3	67809	chr2:119136998-119157034:-	59.8854	65.2797	61.0417	46.5976	44.2811	29.8155	51.2243	30.4665	60.9588	50.71	25.9454	66.9942
Rnf13	24017	chr3:57736057-57835425:+	59.868	57.6411	52.5417	59.6948	43.3756	29.8004	47.9411	32.1651	51.0492	47.1906	27.725	55.5393
Gldc	104174	chr19:30098441-30175441:-	59.8665	49.8931	58.4524	80.2236	79.1277	80.2611	64.4841	74.5938	64.2043	43.1391	54.4993	55.2688
Gabarapl2	93739	chr8:111940703-111952915:+	59.8522	63.2278	64.0984	59.2651	51.5622	44.1112	57.3802	41.3257	62.1257	55.9768	52.6336	65.5604
Hnrnpm	76936	chr17:33646233-33685458:-	59.8098	62.0656	55.9818	60.5563	50.2729	46.9234	54.4794	48.0386	61.4467	57.2088	67.547	67.9684
Pon2	330260	chr6:5264624-5298373:-	59.762	66.2712	61.5474	67.9672	53.9259	50.013	60.4942	50.1112	59.8201	52.664	50.5665	62.5334
Nckap1	50884	chr2:80500512-80581182:-	59.7158	61.0323	52.6972	63.6135	58.4026	48.1659	58.8365	46.1551	56.479	46.1877	60.4815	66.5898
Cops9	66915	chr1:92637145-92641985:-	59.7099	60.2019	68.3424	57.8973	44.6104	34.715	54.9429	34.5595	62.1687	63.9359	39.7002	49.0371
Ndufs1	227197	chr1:63143592-63176822:-	59.6824	63.0734	52.0613	60.3699	40.0244	32.0393	48.2252	34.6027	44.3286	37.4416	34.135	59.9284
Arhgdia	192662	chr11:120577235-120581620:-	59.6044	56.2164	69.4623	69.5679	61.6838	71.4852	62.5721	57.4524	71.3459	70.2895	85.1138	59.3531
Ide	15925	chr19:37268741-37330613:-	59.5489	37.9711	76.5223	37.4164	34.9192	46.4781	35.3344	47.3472	57.742	49.5254	31.6328	63.0331
Fam173a	214917	chr17:25790500-25792394:-	59.4823	56.674	59.6512	50.1491	46.5095	37.2926	49.5045	39.2973	54.0188	56.2776	29.9352	53.3244
Cd59a	12509	chr2:104095801-104115410:+	59.3785	63.4843	54.3117	51.2222	48.722	28.6441	55.4685	32.8481	52.1136	45.8012	16.8352	51.0392
St3gal5	20454	chr6:72097608-72154570:+	59.3509	85.3362	87.4469	56.2581	114.596	235.039	179.181	177.643	131.164	148.83	150.97	94.7644
Ndufb8	67264	chr19:44548571-44555442:-	59.3452	66.3008	68.8346	63.1478	37.3807	31.7338	55.0731	31.1553	51.1307	52.2873	33.7857	51.4754
Smim14	68552	chr5:65448755-65492835:-	59.2782	64.3804	69.4056	62.8309	58.7479	78.5234	55.1995	72.3119	64.6582	62.1967	74.8425	61.9042
Gck	103988	chr11:5900821-5950081:-	59.1926	92.4358	60.488	62.1452	67.1435	3.27208	38.9821	12.3308	63.8323	85.341	3.52946	50.5207
Chmp4b	75608	chr2:154657026-154694783:+	59.1739	68.2172	67.9589	60.1943	61.1014	80.4043	67.4842	55.3936	71.7376	72.6376	99.3596	62.8661
Lypla2	26394	chr4:135968225-135972594:-	59.1389	64.8393	66.2218	60.7542	51.3158	44.2506	53.4252	44.3518	63.0739	66.7519	45.0285	58.8978
Gnai3	14679	chr3:108107275-108146152:-	59.0565	61.0452	54.0769	70.4788	46.649	40.092	47.3908	39.492	58.0061	49.7748	53.4751	63.6808
Ptpmt1	66461	chr2:90910713-90918050:-	58.9946	67.3507	67.4688	60.2934	52.0494	42.1723	51.9853	37.511	59.9939	59.8492	41.2734	65.3315
C1qb	12260	chr4:136880145-136886177:-	58.9741	44.4311	63.0016	45.5657	70.7007	45.2354	59.9952	42.6854	90.577	90.6993	39.7237	43.9333
Fam96a	68250	chr9:66126611-66138968:+	58.9637	60.3915	64.4493	64.5267	50.8614	36.3367	53.451	40.9047	67.1349	61.0871	44.5292	61.4502
Fbxo9	71538	chr9:78081500-78109065:-	58.9434	64.9019	55.9329	65.3778	52.5729	37.7227	57.8044	43.1166	54.1383	45.7265	30.9745	56.5837
Pim3	223775	chr15:88862194-88865726:+	58.9138	71.2424	56.9577	74.9261	67.8812	72.5489	87.7283	52.9558	112.052	104.805	87.0714	83.4487
Enho	69638	chr4:41638144-41640302:-	58.8865	37.676	46.2856	68.9636	76.5415	18.8429	29.3389	35.8615	66.6771	60.3465	5.38612	69.3107
Tmem242	70544	chr17:5410864-5440260:-	58.862	57.5164	59.7012	50.8507	45.0928	36.0469	54.4137	36.3813	58.156	55.5466	32.6866	54.4836
Uso1	56041	chr5:92137938-92202795:+	58.7853	53.9372	59.3091	53.6312	65.9559	79.115	56.9032	70.8773	64.591	61.903	101.582	69.4133
Slc25a17	20524	chr15:81318921-81360765:-	58.6734	62.7558	66.7936	53.0331	43.4328	38.6056	49.9245	41.7705	55.9909	44.9948	42.3976	57.2009
Acot12	74156	chr13:91741521-91786148:+	58.6473	69.5076	65.3989	54.7227	48.4958	31.0089	57.1656	35.6961	49.3245	43.66	28.4787	63.3212
Rrp1	18114	chr10:78400362-78413043:-	58.6082	59.534	63.2557	63.1371	50.1418	48.7514	55.7342	43.4226	63.2265	60.7878	55.4198	61.1046
Igbp1	18518	chrX:100494291-100516125:+	58.602	59.3823	60.7032	59.7171	39.0842	29.0288	47.4161	30.5355	54.8591	51.637	31.8974	57.5249
Golph3	66629	chr15:12321496-12351267:+	58.5845	59.5145	56.595	59.3793	50.8161	51.4109	52.9094	51.0495	58.6108	53.4217	63.2221	67.2097
Gpcpd1	74182	chr2:132529082-132578248:-	58.4945	48.1848	41.8416	51.9464	23.361	29.5716	34.2969	16.2586	33.9632	34.6014	49.4011	62.7469
Cltb	74325	chr13:54592386-54611373:-	58.4552	58.8098	62.4462	55.6274	53.8237	49.0267	60.0733	41.2449	63.4865	66.0563	67.597	63.3207
Taf15	70439	chr11:83473108-83506740:+	58.3873	54.4632	51.6993	56.1833	46.9505	42.9439	48.5477	41.2914	49.1636	44.9409	60.9739	54.0648
Slc40a1	53945	chr1:45908070-45925594:-	58.3631	81.9226	68.9199	88.6054	57.5686	32.2423	55.7369	53.2848	90.6591	81.8949	48.8859	70.7921
Slc41a2	338365	chr10:83231139-83337817:-	58.2985	52.618	44.9895	67.2589	52.962	47.0869	46.9507	44.8186	54.5483	55.1836	84.6345	79.2309
Coro1b	23789	chr19:4148663-4154035:+	58.2481	65.8236	63.2154	52.5736	45.3534	33.0093	51.6048	32.8887	61.3875	57.1328	39.0184	57.2755
Sgta	52551	chr10:81044073-81060154:-	58.1715	61.3992	61.3905	58.1988	50.9811	40.3591	53.1658	38.9098	60.9403	58.4644	44.4397	58.4686
Gstm4	14865	chr3:108040408-108044859:-	58.1391	59.5815	65.0128	46.4575	37.5894	16.1383	57.2154	15.3067	49.4181	33.4707	8.19161	39.1509
F11r	16456	chr1:171437561-171464593:+	58.1135	64.6915	60.5078	67.8414	62.4611	57.5323	60.515	63.8427	56.8005	56.0099	68.3595	60.8631
Dnajc15	66148	chr14:77826217-77874917:-	58.107	58.8203	63.6222	56.8526	48.5596	40.5649	58.0177	42.1211	56.794	59.6291	43.6954	54.5915
Gpr146	80290	chr5:139380667-139396414:+	58.0226	60.3103	49.346	88.0751	57.4705	18.0669	44.5016	25.7948	42.0776	38.7904	31.5983	54.8321
Tmem219	68742	chr7:126886219-126898278:-	58.003	61.9684	67.3429	68.8897	47.6253	36.6348	49.9402	37.1334	57.6878	48.4804	33.296	54.9616
Emg1	14791	chr6:124704370-124712178:-	57.9237	56.7106	58.7261	57.4646	46.7511	31.3592	45.5966	35.238	58.6341	51.4368	36.2531	50.2595
Clec4f	51811	chr6:83644542-83656116:-	57.8488	39.4489	61.054	40.9871	48.2718	23.3867	41.3329	26.3472	79.187	71.2847	21.5652	53.4613
Ctnna1	12385	chr18:35118912-35254775:+	57.7241	61.6303	60.1856	59.4612	51.9984	40.3816	54.1334	40.2544	61.4643	51.955	51.3385	68.4902
Pdcd5	56330	chr7:35641985-35647482:-	57.7154	61.4337	60.0011	54.4849	40.6596	39.7493	52.6968	32.7607	52.8763	58.8467	46.0867	43.9821
Ido2	209176	chr8:24531892-24576333:-	57.6859	63.924	57.4291	51.1446	53.9106	28.431	50.4885	39.724	65.6181	49.772	10.6761	80.298
Spcs2	66624	chr7:99837569-99858883:-	57.6605	50.0696	63.5236	60.1661	74.5709	108.19	63.0102	99.4996	76.0443	78.3208	119.938	60.841
Eif3a	13669	chr19:60761116-60790693:-	57.6461	49.0467	50.8305	53.3341	52.3259	50.2187	47.7133	49.0901	52.894	44.328	62.0229	55.8458
Fads6	328035	chr11:115283366-115297546:-	57.6322	58.3184	40.1327	64.6814	52.5859	29.0377	37.568	38.6751	46.572	24.7407	23.2425	57.8746
Tex261	21766	chr6:83770414-83775812:-	57.5704	63.503	57.0983	61.9691	51.1786	41.8633	51.4922	43.9573	54.4169	45.4178	35.7469	61.3282
Acat2	110460	chr17:12943042-12960725:-	57.5556	61.904	65.3678	56.771	47.349	41.9487	46.3243	33.0821	43.1153	33.1416	30.8728	38.9927
Erbb3	13867	chr10:128569368-128589501:-	57.5424	49.4609	42.6504	53.1883	46.4544	27.803	42.8781	43.2608	35.3116	24.4499	14.5237	72.3964
Isoc1	66307	chr18:58659482-58679570:+	57.5353	63.0049	49.7546	58.4142	44.7114	23.8308	44.7041	32.3466	49.7632	38.9721	18.1041	63.8387
Adipor1	72674	chr1:134415378-134433350:+	57.5166	62.7352	60.697	63.9646	56.8707	52.4347	61.2676	49.0359	60.2577	53.6446	51.1684	62.0755
Apeh	235606	chr9:108085414-108094480:-	57.4078	56.1993	59.5201	57.1217	45.4745	25.5743	46.7681	34.1611	58.5008	49.8944	25.8324	61.4467
Foxa3	15377	chr7:19013283-19023539:-	57.3493	59.7535	50.4711	72.8086	73.6069	59.9102	58.3764	69.2677	76.7811	72.5775	68.3131	61.5198
Pnrc2	52830	chr4:135870926-135873846:-	57.2677	46.3072	51.9183	43.4883	45.5029	36.4526	45.6875	39.1549	49.2847	40.3951	36.4172	48.5648
Polr2j	20022	chr5:136116691-136122947:+	57.2149	59.6523	60.6867	52.4987	41.7566	34.9811	51.0742	31.2453	63.0244	53.2535	34.9841	54.0587
Commd6	66200	chr14:101633766-101640471:-	57.1765	58.0614	59.0579	46.1073	37.3026	28.8459	48.6846	29.4823	54.8189	56.235	28.7473	51.2099
Rbbp4	19646	chr4:129307100-129335370:-	57.1698	53.1998	67.8554	60.6035	38.648	26.3424	44.9146	28.6504	54.2147	50.1116	27.4429	52.2555
Rex1bd	66462	chr8:70504295-70506752:-	57.139	60.4399	63.6451	53.654	42.9913	27.3361	50.8021	30.4017	55.8075	60.7443	27.7226	52.3516
Actr2	66713	chr11:20062304-20112951:-	57.0778	58.6369	49.7157	57.098	48.763	41.6749	52.3225	39.2738	55.8497	50.1287	50.1083	60.4733
Etfbkmt	320204	chr6:149141513-149151170:+	56.9429	68.1733	52.0671	81.4632	65.6758	74.0149	71.4909	80.7931	52.9629	55.8325	83.3814	68.8309
Cryz	12972	chr3:154596711-154623182:+	56.9057	74.7581	59.0759	56.3346	37.4038	23.6957	47.4422	26.3087	49.8391	53.4911	25.4601	54.6881
Tmem250-ps	109299	chr2:26136807-26140506:-	56.863	61.3455	54.3561	52.884	45.2103	31.6267	51.6529	34.1725	54.9886	52.1344	28.6658	55.757
H2afz	51788	chr3:137864487-137866922:+	56.8338	62.1585	58.3497	65.1869	38.8816	24.3285	48.3088	26.1694	50.153	51.6612	30.2239	45.6729
Csnk1g2	103236	chr10:80622780-80640771:+	56.815	64.7155	62.065	57.3131	55.4323	55.0907	56.69	47.4103	55.4466	52.672	53.8462	55.7941
Abca6	76184	chr11:110176821-110251776:-	56.7894	67.6719	49.196	74.5828	65.4906	53.3508	57.7514	76.421	47.6563	35.6186	38.6713	75.0293
Srsf6	67996	chr2:162931508-162937120:+	56.752	54.4342	53.9252	61.0082	52.1677	42.098	55.5355	43.8609	61.9055	56.2158	47.2412	53.7092
Mif4gd	69674	chr11:115607919-115612969:-	56.7441	60.6218	53.843	46.3808	59.1149	53.771	70.4279	60.1866	63.9197	70.3777	43.8986	67.1687
Sf3b2	319322	chr19:5273921-5295455:-	56.7248	59.7357	61.8131	63.2404	46.0079	39.4018	52.1373	39.7069	61.6148	57.459	43.179	64.2519
Mccc2	78038	chr13:99948532-100015639:-	56.714	59.8093	56.9859	54.3798	37.5005	22.6834	41.9275	28.4569	45.533	46.333	18.3324	54.5565
Golga7	57437	chr8:23241326-23257080:-	56.615	52.5874	56.0933	49.1615	46.1494	39.4452	48.1417	37.7362	57.6209	49.0898	42.6234	55.3286
Cltc	67300	chr11:86694354-86757567:-	56.4471	58.9987	53.6246	64.8282	64.7685	64.4248	55.1355	60.488	59.7656	48.0808	74.9748	65.8642
Spcs3	76687	chr8:54520433-54529998:-	56.4389	49.4864	54.5887	53.6193	63.5264	91.591	52.5792	80.7129	55.6376	55.4042	86.0494	50.7009
Ptbp1	19205	chr10:79854432-79864435:+	56.4239	53.0552	46.4574	52.3277	44.7711	46.6174	42.2117	39.289	47.3022	42.8905	70.9045	52.8495
Abcb6	74104	chr1:75171641-75180392:-	56.4152	71.5436	63.3768	57.4039	42.2026	21.9808	54.1283	26.5596	50.3555	49.2331	23.5367	60.2401
Ubxn4	67812	chr1:128244137-128279378:+	56.3681	46.3175	56.1024	46.016	55.0432	53.6107	55.2823	51.8754	65.9732	57.4101	56.482	61.5382
Bmp1	12153	chr14:70474555-70520260:-	56.3307	58.5303	52.8099	53.7943	72.7081	53.2559	64.105	56.3905	70.8677	57.3754	45.7318	63.5819
Chdh	218865	chr14:30009000-30040466:+	56.3282	74.4065	58.2518	70.2215	52.7959	38.1702	50.9145	50.2724	52.7765	47.9471	58.6234	70.7397
Cenpb	12616	chr2:131177289-131180067:-	56.3022	68.1194	64.8675	52.8103	51.1721	47.7206	63.6612	46.0713	62.2448	65.8292	44.8148	60.987
Slc38a2	67760	chr15:96687392-96699728:-	56.2791	60.846	45.8217	74.4839	51.6954	70.4427	67.6342	55.4113	87.7044	92.9499	117.776	74.2074
Pex6	224824	chr17:46711463-46725541:+	56.2549	70.2564	69.3152	59.77	43.916	32.291	49.1891	34.0117	58.6803	58.4355	32.7593	62.584
Nrbp2	223649	chr15:76085594-76090013:-	56.1948	54.6518	53.158	60.9253	71.3603	74.9759	72.5528	83.9644	74.347	76.5171	74.6593	59.2959
Nfs1	18041	chr2:156123637-156144186:-	56.191	67.9587	59.8151	58.2869	46.41	31.6187	51.2704	36.0057	53.6521	51.7355	32.4375	59.4858
Hspa4	15525	chr11:53259814-53300479:-	56.1903	55.7338	51.4255	51.1778	42.2789	29.1219	44.994	30.9231	53.3947	44.6031	39.1587	61.9947
Emc3	66087	chr6:113514887-113531638:-	56.0059	56.4739	56.2237	55.2159	43.8255	37.4616	53.7346	33.442	51.5149	50.5121	39.9303	53.6152
St3gal1	20442	chr15:67102875-67176882:-	55.9826	45.0011	41.3304	47.7277	46.5938	37.3574	44.2137	36.0218	48.9723	40.7411	50.7597	42.3496
Polr2m	28015	chr9:71478437-71485983:-	55.9515	55.8008	56.3985	55.3607	42.103	25.8927	50.0823	28.6362	52.1202	42.2706	29.0349	56.0039
Rtcb	28088	chr10:85938637-85957793:-	55.9423	60.2776	59.9526	57.1748	43.297	34.0342	50.4969	34.1878	56.0191	51.9317	38.7745	57.1045
Pnkd	56695	chr1:74285034-74353692:+	55.9335	55.0768	55.6949	46.5139	59.4735	26.2163	62.8887	39.7116	60.5493	48.0209	9.85838	47.4038
Sbds	66711	chr5:130245732-130255530:-	55.9034	62.9135	56.6358	52.9714	40.2745	29.0255	49.7616	27.7192	49.3414	48.485	43.8986	48.8242
Mea1	17256	chr17:46680453-46683126:+	55.7999	61.7876	60.0454	54.5116	45.4409	46.8523	55.3154	46.1937	54.696	61.9957	49.262	51.3115
Calu	12321	chr6:29348106-29376675:+	55.7893	61.4219	54.1712	59.97	74.0557	117.979	66.4892	98.112	57.5501	56.6745	118.23	55.9744
Syvn1	74126	chr19:6046576-6053718:+	55.66	46.3711	55.4016	55.669	70.6196	104.205	46.4566	94.0003	73.7132	81.0053	95.65	66.459
Eif2s3y	26908	chrY:1010595-1028594:+	55.6243	55.0412	39.6565	52.9916	39.9972	31.6182	43.1767	35.4447	51.9914	48.6897	43.3081	55.1645
C1qa	12259	chr4:136895916-136898844:-	55.5964	41.1138	60.6154	44.5211	56.5374	38.793	55.4498	38.8139	91.0023	87.0924	34.486	48.8943
Nfe2l1	18023	chr11:96817414-96829968:-	55.5268	70.4095	55.338	47.6099	59.6856	53.7651	82.7538	53.2696	56.7456	48.8842	48.7061	61.657
Polr2f	69833	chr15:79141325-79151774:+	55.497	55.2552	61.8361	48.8721	39.5432	34.1882	50.906	33.2554	57.2645	60.0267	34.9492	50.745
Metap1d	66559	chr2:71453338-71525191:+	55.4656	48.2044	54.0934	47.1317	52.7822	42.6431	56.1132	48.8734	56.4524	54.2089	30.7883	45.9186
Phb	18673	chr11:95666957-95680773:+	55.4523	59.794	60.0383	58.7572	39.8035	26.3549	49.5785	26.0686	58.1966	53.0984	29.282	53.0393
Rhou	69581	chr8:123653929-123663880:+	55.4029	53.8018	49.4453	61.6178	39.5352	37.3781	43.2592	39.0566	34.6995	36.8728	40.4566	38.713
S1pr1	13609	chr3:115710433-115715055:-	55.3944	48.0799	41.726	36.6504	41.9964	24.423	38.948	35.3925	40.4573	31.07	32.9856	32.2169
Ifnar2	15976	chr16:91372783-91405589:+	55.3165	55.4797	51.6891	50.3814	45.1835	37.6822	48.5049	43.3848	50.647	54.3726	35.8982	50.4778
Mafg	17134	chr11:120628351-120633547:-	55.2921	46.596	48.5917	44.5688	46.2791	33.8393	44.9501	32.9512	47.0539	43.1439	32.6825	49.7135
Arpc1b	11867	chr5:145114256-145128186:+	55.2756	52.9279	55.9216	60.1406	50.3282	55.6985	55.079	46.8694	55.2822	52.9544	66.7678	40.9723
Yipf1	230584	chr4:107314363-107359823:+	55.262	56.0446	56.4671	49.6061	45.1958	34.8094	53.0224	37.74	60.0958	53.7631	31.5127	56.9411
Gtf2a2	235459	chr9:70012548-70022866:+	55.1935	56.1484	54.3916	53.7491	69.1897	91.194	74.8324	86.7648	66.6709	83.1743	106.251	69.8005
Mpp6	56524	chr6:50110241-50198598:+	55.1916	65.9088	57.5035	59.1997	51.6674	52.7795	58.1755	52.0144	51.1197	52.3346	57.7478	50.8021
Ndufb4	68194	chr16:37647602-37654368:-	55.1811	61.9561	52.8216	54.2584	36.3622	26.4153	49.6452	25.937	50.3247	52.2293	26.4939	50.5422
2310039H08Rik	67101	chr17:46772635-46773407:+	55.1148	63.4156	63.268	55.0239	39.7857	61.0651	47.8638	46.9329	50.2969	58.8872	54.8023	43.9496
Puf60	67959	chr15:76070182-76080946:-	55.101	49.8052	55.2258	53.7143	48.1644	46.2593	49.2366	39.3343	57.2621	55.7007	51.9819	55.5267
Smim10l1	381820	chr6:133105239-133110899:+	55.0359	57.8054	52.4596	57.2398	43.5982	29.0305	51.3529	31.0747	52.4617	46.8243	29.6292	54.6137
Prkd3	75292	chr17:78949405-79020816:-	54.9983	60.0213	45.988	59.7568	48.0483	20.3727	41.039	35.8032	44.6298	31.7618	16.8279	52.6189
Pm20d1	212933	chr1:131797395-131821472:+	54.9631	56.4175	48.7653	50.8043	33.6285	20.314	37.6412	23.6676	46.4033	38.1036	15.9974	56.2136
Cfdp1	23837	chr8:111768473-111854310:-	54.9431	61.1899	65.0145	58.7955	42.1755	46.9993	53.2337	42.8003	57.642	64.6661	53.69	54.0341
Otulin	432940	chr15:27605921-27630693:-	54.8571	55.9873	61.1246	58.8582	51.9454	33.4807	54.1971	34.7872	46.9478	52.8903	41.4516	46.5309
Pnp	18950	chr14:50944303-50953412:+	54.8076	55.2189	59.4324	52.8235	62.3294	96.2531	65.2273	76.0737	66.8716	66.3806	112.769	56.0455
Wbp1	22377	chr6:83119044-83121461:-	54.7929	54.5826	56.5099	38.1237	52.6203	37.8443	54.6263	42.2514	50.7074	47.5724	31.9686	44.1495
Mrpl9	78523	chr3:94443336-94448708:+	54.6738	57.0676	57.6349	52.7575	33.1062	21.3397	42.2628	23.9357	44.4743	37.3339	26.5969	45.784
Mrpl10	107732	chr11:97041586-97049213:+	54.6273	56.7127	58.1898	51.0631	41.9245	38.2613	46.8866	38.0392	51.0538	53.0302	39.1747	50.2487
Pank1	75735	chr19:34806936-34879455:-	54.593	70.5	61.5107	52.3507	42.1844	21.9654	55.043	29.6643	39.462	38.4722	10.484	62.1312
Copb1	70349	chr7:114215559-114254680:-	54.5749	53.8772	53.7905	57.2837	52.3524	57.5672	50.8338	53.4261	56.4097	49.0145	66.1989	62.8548
Htatip2	53415	chr7:49759106-49773999:+	54.5366	48.5366	54.2693	45.9529	46.8603	20.3809	41.1141	18.3482	50.8839	41.2137	24.0194	37.1351
Amt	434437	chr9:108296922-108301597:+	54.5142	55.8408	49.3563	48.7502	53.5682	36.8354	45.038	38.8361	47.0762	33.8446	16.7312	46.229
Stoml2	66592	chr4:43027690-43031384:-	54.5106	55.4005	60.2587	51.8409	38.814	30.403	46.0524	30.7352	51.4479	49.2474	34.5971	53.3631
Rap1b	215449	chr10:117814597-117845974:-	54.4834	57.2966	51.4716	56.3515	50.3358	43.1232	57.2557	42.1679	54.553	48.6178	62.4145	54.5255
Mrpl54	66047	chr10:81264722-81266926:-	54.4341	54.429	61.87	50.3577	50.251	62.7162	58.7291	46.3822	58.1623	63.2093	52.0502	55.0525
Ssu72	68991	chr4:155704815-155733873:+	54.4328	59.982	60.7734	51.5339	44.4407	50.311	51.1241	44.5642	60.8367	56.6039	54.4573	52.6255
Egln2	112406	chr7:27158658-27166802:-	54.3949	57.7525	57.8938	57.3127	50.2119	37.6584	53.6165	40.4455	57.9145	56.2406	37.1274	57.4168
Fus	233908	chr7:127967479-127982031:+	54.3838	54.8254	51.2003	50.8221	40.5363	54.2972	45.0577	43.8147	47.167	51.5694	69.5379	48.9797
Pigyl	66268	chr9:22156846-22158354:+	54.3825	51.6203	65.9482	55.4536	43.1123	28.4548	49.4914	33.6882	52.3204	49.0731	29.7316	45.2909
Rtfdc1	66404	chr2:172440578-172469899:+	54.3465	68.5131	66.0865	51.035	54.5164	46.8409	69.242	46.9026	56.1803	53.8303	39.3899	57.8772
Tkt	21881	chr14:30549131-30574726:+	54.3327	55.8803	61.11	49.1293	31.5707	23.5581	33.4792	22.4708	41.7104	35.671	25.4365	42.914
Pop5	117109	chr5:115235851-115240970:+	54.302	57.0364	63.0696	54.5192	42.7469	25.8734	51.7524	30.2821	55.063	55.7779	24.0133	50.5918
Tapt1	231225	chr5:44175162-44226606:-	54.2825	63.4731	46.7422	54.8819	52.996	34.7922	54.9034	36.93	44.6669	43.4185	42.7285	53.5454
Ccdc124	234388	chr8:70868227-70873490:-	54.2583	58.0603	67.5023	51.6161	43.8773	38.268	50.8926	36.1624	60.5612	62.8463	39.3208	55.973
Npepl1	228961	chr2:174110351-174122702:+	54.1535	62.985	61.9518	54.3752	43.6779	33.1498	50.1728	34.601	53.5478	53.2864	29.5588	49.879
Rtp3	235636	chr9:110984943-110989713:-	53.8336	51.1642	49.8667	44.2385	45.808	38.8808	43.3612	55.0904	46.2416	37.4837	37.9084	44.6564
Nabp2	69917	chr10:128401395-128409796:-	53.8308	54.8317	60.0106	52.243	39.3107	37.1818	49.5258	32.4801	57.3184	50.2186	37.4724	50.7733
Orm3	18407	chr4:63356162-63359511:+	53.7563	32.8285	50.647	12.322	44.2304	33.013	35.1556	42.5302	60.4571	73.907	15.7308	53.6795
Ppa2	74776	chr3:133310110-133378235:+	53.7466	58.7309	54.4316	46.0724	32.5684	26.2159	37.9713	24.7065	44.5388	43.0856	24.7584	42.3085
Cpq	54381	chr15:33083129-33594552:+	53.7305	52.8045	46.214	52.8371	36.7792	18.6693	38.1052	27.3549	44.4969	38.0239	16.9445	49.6172
Rnf125	67664	chr18:20944625-20983848:+	53.6966	50.8038	38.643	60.0342	34.2358	18.5025	28.6643	18.0114	20.2896	11.9269	18.7244	49.6918
Ahcyl1	229709	chr3:107663120-107696560:-	53.6697	50.8123	48.0388	51.3807	51.9789	43.948	47.5513	46.1004	53.9363	42.1282	37.432	53.5223
Usp4	22258	chr9:108347831-108392545:+	53.6692	51.994	49.3936	49.8817	39.261	26.667	41.5056	28.2684	44.8044	38.3856	33.5793	47.8391
Ptprf	19268	chr4:118208213-118291397:-	53.6266	65.1083	47.4783	58.8491	49.2298	30.4041	44.5117	38.5274	44.8954	39.2614	30.4558	56.8553
Aprt	11821	chr8:122574637-122576907:-	53.6133	60.842	57.2731	53.1604	52.4471	32.6883	57.7247	32.461	71.8029	71.4322	33.7604	67.7138
Gnat1	14685	chr9:107674474-107679592:-	53.5713	48.395	40.8783	71.2769	44.5183	60.3771	43.8043	56.8141	45.153	44.4034	62.6072	48.7571
Ilk	16202	chr7:105736590-105742925:+	53.5305	61.2076	59.894	53.3131	43.3267	32.7285	50.2283	33.0368	53.2662	51.5896	48.2675	55.598
Zc3h15	69082	chr2:83644578-83664616:+	53.4833	46.931	47.2869	54.936	45.9785	48.7927	49.2264	40.3122	52.1707	43.8967	58.2854	47.3009
Masp1	17174	chr16:23451785-23520590:-	53.4749	54.0673	41.6489	56.1131	52.7247	44.1097	40.4497	51.9399	46.5343	33.3715	41.7771	63.5077
Mettl9	59052	chr7:121034445-121076835:+	53.3645	55.8203	58.73	47.534	52.4032	66.9322	53.1058	55.0352	54.9737	53.2755	69.3035	49.5089
Fuca1	71665	chr4:135920726-135940300:+	53.3638	59.3989	58.6513	54.2199	43.9589	35.1799	49.9615	35.4493	53.8965	49.524	32.6412	54.215
Cox14	66379	chr15:99725618-99728136:+	53.3242	49.6175	61.5494	49.9707	42.8269	36.4533	51.8723	29.7494	52.0696	49.2801	29.205	45.9311
Raf1	110157	chr6:115618573-115676636:-	53.3185	61.3256	54.2397	62.4902	51.1561	39.0221	50.8988	38.8919	53.514	44.3694	54.1113	50.5584
Dynlt3	67117	chrX:9654270-9662983:-	53.3024	54.1991	47.1848	57.4357	37.4236	32.0608	42.2156	33.5113	46.1859	41.8	31.8892	45.2954
Arpc5l	74192	chr2:39008139-39015872:+	53.2895	52.6405	54.9198	53.1471	42.8886	36.7547	49.3713	35.1844	55.8173	54.4221	41.1355	51.7537
Agtr1a	11607	chr13:30336356-30382867:+	53.2665	48.3686	48.8602	53.4225	53.9522	27.3219	52.5566	40.6488	47.7996	40.4515	20.2387	41.5254
March6	223455	chr15:31455899-31531037:-	53.2239	53.6287	46.6819	48.3677	49.6936	38.999	53.2653	44.8716	47.7646	39.315	47.6507	59.0069
Lrrc3	237387	chr10:77897576-77902536:-	53.2119	55.5125	51.7021	50.7259	57.4498	19.6104	52.3703	37.0044	64.8016	46.0548	12.9498	58.2335
Rdh9	103142	chr10:127776405-127792697:+	53.044	64.3663	46.2385	43.967	64.216	23.362	80.9022	37.1865	54.731	45.2644	9.24182	44.1781
Slc8b1	170756	chr5:120511192-120534024:+	53.0071	43.528	46.1417	56.2227	46.2045	28.4124	42.9883	33.147	42.2202	48.3595	21.7893	54.049
Lurap1l	52829	chr4:80910686-80954301:+	52.8887	57.8848	53.977	65.7597	59.4338	67.9185	71.5986	61.656	73.8852	73.3981	73.0438	67.2658
Gsr	14782	chr8:33653238-33698162:+	52.8864	51.7385	57.4772	57.4449	41.5546	37.6803	44.3408	30.0081	45.9842	44.9002	63.4164	48.3293
Mtpn	14489	chr6:35508824-35539888:-	52.8126	58.1299	50.3601	55.472	40.5727	31.6709	45.8587	34.4203	52.944	45.062	35.0689	57.1793
C1qc	12262	chr4:136889802-136892914:-	52.8035	36.1628	60.8522	40.7179	60.3847	37.7067	55.6163	37.0682	88.3701	84.9766	33.5279	48.4394
Kxd1	75620	chr8:70513396-70523180:-	52.8007	57.3262	60.3542	58.7472	42.6921	29.5296	45.4511	30.3386	50.7623	50.5688	25.9926	51.9978
Cul4a	99375	chr8:13105721-13147939:+	52.7342	63.5307	48.7642	56.0688	51.7767	34.5257	52.0677	40.5731	53.4721	44.9168	39.1662	64.1259
Ppp2r1a	51792	chr17:20945454-20965905:+	52.6309	49.7595	54.8513	50.3973	46.227	44.1339	49.6888	37.5328	51.644	46.7262	53.6668	49.5279
Tmem134	66990	chr19:4125960-4132307:+	52.6084	68.3229	66.9254	44.2761	40.2976	30.4728	51.6232	27.5943	52.756	53.7363	28.5905	50.336
Ppp1cb	19046	chr5:32458970-32493712:+	52.6015	55.1861	51.9305	58.0327	45.4294	35.6072	54.0834	37.1453	53.9389	47.1718	46.9532	55.0432
Myh9	17886	chr15:77760585-77842175:-	52.6005	51.361	46.612	62.9057	52.6971	37.6989	43.0455	40.3269	54.929	49.4251	52.0407	70.7862
Naa10	56292	chrX:73916870-73921944:-	52.5614	53.0798	61.7502	52.8745	37.3367	28.8537	42.2961	30.4879	50.586	47.7597	28.2681	43.4586
Eprs	107508	chr1:185363044-185428360:+	52.4404	50.9255	48.0471	58.7575	49.3298	39.9926	46.8304	42.0799	52.9208	46.5673	49.3927	61.5826
Pmvk	68603	chr3:89454541-89469009:+	52.4386	61.925	62.3516	50.7595	35.9526	41.7936	35.8079	26.4679	31.4068	22.8787	31.2311	33.122
Dctpp1	66422	chr7:127256959-127260667:-	52.2917	55.0557	63.0416	60.1802	38.5952	24.0846	43.008	29.8459	54.772	54.8415	22.157	50.7702
Ppp6r1	243819	chr7:4631495-4658950:-	52.2456	53.7241	50.6127	52.0852	42.2641	28.0698	40.095	30.435	50.379	40.0196	35.9591	56.8158
Slc33a1	11416	chr3:63942324-63964733:-	52.1513	49.3892	56.0249	50.6189	56.788	67.7136	46.8896	64.6637	54.2177	48.0853	79.3579	57.9801
Smpd1	20597	chr7:105554360-105558389:+	52.0568	52.2453	51.8778	51.1548	51.4191	45.4132	52.1846	47.0987	59.0679	51.6249	44.7358	54.4374
Eif2s2	67204	chr2:154871410-154892906:-	52.0539	48.7058	48.7158	49.9484	43.0167	37.6783	44.8264	36.1592	48.0155	44.1965	55.9694	47.8615
Galk1	14635	chr11:116008357-116012719:-	51.9966	70.7505	66.7038	38.1294	42.7343	21.7599	51.1164	25.1293	53.7016	55.1078	26.4383	50.5343
Klf9	16601	chr19:23141226-23166911:+	51.9736	44.304	39.2738	66.5511	69.6358	54.5956	63.025	50.1681	53.0916	40.5895	51.4191	63.5244
BC004004	80748	chr17:29268788-29302887:+	51.9359	47.002	51.4025	50.1611	43.2421	29.3641	46.8356	28.8838	44.0649	41.0483	33.4436	39.006
Dpm3	68563	chr3:89266461-89267079:+	51.916	60.2867	71.4275	54.5204	52.3534	53.3103	58.7425	48.3446	56.0267	58.2166	50.7882	51.5557
Anp32b	67628	chr4:46450926-46472656:+	51.8969	53.6988	54.6418	56.424	42.4943	37.8515	46.4471	34.2544	48.6709	49.0062	49.1685	47.4558
Stt3b	68292	chr9:115242582-115310421:-	51.8825	53.5165	51.7559	51.7053	68.7571	85.85	59.9364	79.2759	52.2951	48.8094	87.7764	50.8857
Napa	108124	chr7:16098643-16117975:+	51.752	54.1906	56.8694	55.9378	45.5649	38.9284	49.9985	39.3451	59.1181	54.6866	54.8733	52.1503
Rpl7l1	66229	chr17:46773907-46782656:-	51.7505	49.5683	52.9913	48.439	43.1537	36.0661	47.3133	40.2493	57.6346	50.0682	45.3978	51.8034
Raly	19383	chr2:154791110-154867261:+	51.6739	55.6318	57.9192	53.9383	49.9975	40.6535	53.6794	35.0676	55.358	52.2591	51.5725	54.431
Aldh16a1	69748	chr7:45141840-45154538:-	51.6309	53.9541	52.7175	52.6935	45.0009	22.9245	45.3319	30.1484	57.9286	48.9384	23.0352	49.437
Rnf114	81018	chr2:167492645-167516166:+	51.5873	54.4715	51.5955	54.54	48.6013	36.5233	51.1355	37.6506	50.6542	46.2211	45.3322	51.3355
Ddx39b	53817	chr17:35241746-35253707:+	51.583	49.5073	53.884	46.3957	36.7992	45.3326	39.4285	38.563	51.505	50.0737	47.3696	48.4752
Pex14	56273	chr4:148960535-149099812:-	51.5236	59.7205	59.6688	46.7635	45.0712	39.9963	53.4918	38.3441	53.1759	46.7212	37.5919	56.1903
Lrrc59	98238	chr11:94629824-94645216:+	51.5063	50.7733	60.9952	45.1709	72.7817	126.833	61.5247	98.1325	78.2391	76.3459	158.856	69.5171
Vps35	65114	chr8:85260392-85299497:-	51.4561	56.9222	48.9397	58.7482	46.3024	40.4616	46.5994	39.757	49.8531	39.351	51.4067	58.7713
Rnf103	22644	chr6:71493877-71510880:+	51.4411	51.1626	50.7101	55.4362	44.1985	32.1339	46.8585	35.1828	48.4135	39.5403	33.8969	57.4629
Ggnbp2	217039	chr11:84832361-84870738:-	51.4367	45.4637	45.1264	52.5139	45.1238	32.2859	43.5856	34.356	43.807	38.4616	38.3034	51.4452
Hmgb1	15289	chr5:149046702-149053057:-	51.4217	50.5098	51.1542	50.0261	40.443	32.0561	48.3194	35.5572	51.3486	48.8864	32.2812	52.8
Pmm2	54128	chr16:8637707-8657524:+	51.4057	52.0877	55.188	45.3539	42.5042	28.4778	42.3123	28.6693	54.1015	52.3282	35.1287	50.2274
Rheb	19744	chr5:24802823-24842361:-	51.3852	48.2094	53.2589	50.6378	42.3128	29.4758	45.7231	28.9538	49.9288	45.1942	39.4539	54.8552
Csrp2	13008	chr10:110920176-110939514:+	51.3825	64.0827	58.8358	62.8686	38.0348	18.1173	47.7114	25.1132	51.7653	43.395	25.1837	47.6073
Mat2a	232087	chr6:72432799-72439558:-	51.3597	67.2758	53.8062	43.0468	40.1065	30.6349	52.5835	36.6546	52.3379	55.6246	45.6208	53.6692
Surf1	20930	chr2:26913378-26916530:-	51.3592	54.7219	55.0357	53.662	34.7443	28.2217	41.7208	27.9976	47.3749	46.1988	27.3556	47.2026
2200002D01Rik	72275	chr7:29247521-29248467:-	51.3359	52.3637	67.4116	27.7482	33.8833	30.5301	36.9406	26.3135	44.6798	62.8842	26.7548	52.9275
Set	56086	chr2:30061996-30072577:+	51.3267	49.0505	52.7327	51.6691	40.3458	34.2438	41.5521	32.266	53.3953	50	43.1767	45.5897
Wwc1	211652	chr11:35839178-35980089:-	51.3167	53.0933	48.3032	47.0951	38.8282	19.3083	34.6185	27.3496	40.55	36.3949	36.2578	48.338
Mrps18a	68565	chr17:46111004-46128908:+	51.3066	55.3799	57.4057	49.9255	34.0919	23.5642	40.5912	22.216	51.6855	50.552	28.4528	49.5012
Isca2	74316	chr12:84773270-84775089:+	51.243	49.7238	50.9049	47.1098	41.4652	34.2195	46.8561	32.6999	49.5031	46.4973	36.0596	41.6361
Maz	17188	chr7:127022137-127026479:-	51.2171	54.1589	50.6246	55.6642	43.4194	30.1423	41.5673	30.057	52.2325	46.2994	41.8435	46.3461
Sirt7	209011	chr11:120618372-120625002:-	51.1269	47.8071	54.134	43.5372	36.5003	20.4091	38.5434	26.1548	49.0117	38.6491	16.1004	43.3353
Dars	226414	chr1:128363707-128417416:-	51.1205	52.2564	44.1775	47.5844	35.1696	26.8448	40.5618	27.6442	46.4363	38.4643	31.3537	60.2081
Deptor	97998	chr15:55112317-55259273:+	51.0709	52.7073	45.2439	55.8198	39.0593	17.2743	35.0023	22.5526	34.8782	29.327	21.9341	47.0072
Tpp1	12751	chr7:105744816-105752235:-	51.0459	57.2814	47.9198	56.5587	50.0838	39.876	50.8266	42.625	53.1426	49.2929	45.8508	55.6665
Erdr1	170942	chrY:90785442-90816465:+	50.9697	34.3646	29.4865	49.4568	61.7439	52.3156	66.2272	8.14689	47.5319	21.7417	27.2318	13.5354
Tm9sf1	74140	chr14:55635966-55643806:-	50.9484	54.2376	52.11	51.7599	52.158	60.4683	50.6843	54.2417	53.6853	52.2255	60.3344	51.5032
Pnrc1	108767	chr4:33245423-33248787:-	50.9265	49.6596	51.5963	50.6173	60.9884	96.3462	57.4219	88.4681	56.6465	36.1561	167.681	57.6137
Trmt112	67674	chr19:6909698-6911026:+	50.8766	49.8703	52.9398	45.9885	38.0426	29.322	42.3457	29.548	51.0705	46.4894	32.0732	41.8752
Slc12a7	20499	chr13:73763697-73816742:+	50.7793	56.4595	47.9613	37.849	39.3677	17.5058	35.9896	27.5713	41.7406	38.3071	17.8504	48.9537
Ppp1r37	232947	chr7:19530967-19562398:-	50.7197	54.5412	58.3026	48.7157	44.9599	28.5139	48.5153	31.6618	52.826	47.701	29.448	55.1148
Dbt	13171	chr3:116513070-116549981:+	50.6936	42.698	40.2327	55.5532	29.6509	20.7631	33.041	25.5479	44.1827	31.5991	14.6417	49.2961
Arl8b	67166	chr6:108783059-108823723:+	50.6192	50.1039	46.5403	45.8042	43.8601	41.1487	52.0027	38.845	48.7692	41.499	52.0097	55.1623
Tbrg1	21376	chr9:37649182-37657312:-	50.6115	49.9473	55.3007	45.8912	46.0762	51.7697	43.5576	41.405	55.2853	50.9891	66.8718	53.3944
Afg3l2	69597	chr18:67404764-67449136:-	50.6012	53.5228	50.6338	48.4038	41.9407	34.5201	45.9342	31.3842	48.4577	42.949	38.4867	53.255
Zfyve21	68520	chr12:111814170-111828388:+	50.5579	58.2306	57.4168	53.3617	44.5863	21.0237	41.0684	28.7332	57.4753	48.5346	17.9616	50.5535
A1cf	69865	chr19:31868761-31949406:+	50.5334	63.0036	47.0258	69.3267	56.2055	24.2796	41.0355	41.4121	39.66	26.1897	13.2453	59.2602
Lactb	80907	chr9:66955393-66975484:-	50.5214	53.6161	46.0213	45.2533	33.6476	20.598	35.869	25.5373	43.7829	37.8381	19.8203	46.4471
Etf1	225363	chr18:34902785-34932003:-	50.5105	52.277	49.8442	57.5626	47.0339	41.7404	53.0159	42.7318	48.4397	43.9877	66.861	51.4215
Sec24c	218811	chr14:20674321-20694850:+	50.4695	49.7603	52.1522	46.7508	52.2098	43.0545	49.3203	48.3773	53.4929	46.3822	42.6347	58.7135
Odc1	18263	chr12:17544873-17551502:+	50.4461	50.9966	68.1319	52.7204	43.4953	56.858	49.8511	45.3239	51.7577	51.7345	50.6894	59.7603
Ivns1abp	117198	chr1:151344498-151364445:+	50.4362	58.979	43.6735	56.6534	50.0682	34.2046	56.5121	41.1612	67.6135	61.0766	37.2402	74.1916
Slc38a10	72055	chr11:120103951-120151351:-	50.397	54.3079	50.512	40.7749	64.2311	82.4119	57.4459	76.1011	49.8946	47.1309	61.6916	50.5746
Eif1a	13664	chr18:46597704-46610225:+	50.3344	36.7971	40.3145	44.207	57.3554	86.5559	56.1245	67.3567	50.6589	45.7473	75.9801	37.482
Lamtor5	68576	chr3:107278858-107284081:+	50.2875	48.706	52.2499	52.3849	38.8153	30.4797	47.4117	31.0652	51.823	53.0819	35.6459	48.003
Tuba1c	22146	chr15:99029891-99038105:+	50.27	46.0852	50.3666	38.2935	48.512	54.3475	37.6846	39.249	58.1113	45.2726	77.4499	46.5874
U2af2	22185	chr7:5062143-5079945:+	50.2428	48.2028	47.4211	48.6003	42.9652	34.3238	42.4436	36.0731	49.4027	45.4729	39.7121	48.1663
Derl2	116891	chr11:71007440-71019841:-	50.2331	46.6019	51.9569	44.686	44.5524	41.2403	42.0254	41.0952	44.2977	43.3443	40.9502	46.1089
Lmf1	76483	chr17:25579174-25662826:+	50.2193	47.9173	51.612	39.4744	41.2242	38.3277	41.3902	42.0612	41.5742	39.7432	30.6182	41.2713
Mrps17	66258	chr5:129715497-129718693:+	50.1644	49.0814	52.4687	48.4345	40.4583	30.0651	45.6471	31.8004	49.5373	45.7041	35.1891	48.5948
Pdha1	18597	chrX:160122219-160138430:-	50.1533	60.202	50.5302	49.4104	39.5515	38.1957	63.5583	34.9985	42.3319	37.9985	40.0392	54.117
Cnpy3	72029	chr17:46735711-46752214:-	50.0833	45.6252	52.6836	36.5801	44.8736	31.7828	38.9292	33.532	54.1919	54.4539	32.3585	44.9727
Tmem38b	52076	chr4:53826045-53862018:+	50.0743	54.875	48.4882	53.1908	48.0945	36.8483	65.1418	46.6779	53.9042	54.7955	43.0394	48.4784
Actr1b	226977	chr1:36699202-36709925:-	50.0164	53.4345	48.2749	49.4695	44.3204	42.3985	45.7273	39.4894	47.5946	43.1224	47.2803	50.2058
Larp1	73158	chr11:58009064-58062032:+	50.0157	46.6428	44.1024	51.5961	47.0428	40.9281	43.7043	42.383	45.9601	36.1338	43.8323	44.4007
Mlec	109154	chr5:115142981-115158176:-	49.9414	55.5283	53.7949	51.4205	67.4533	69.0448	51.3491	70.2959	59.2258	59.0151	68.1491	59.0916
Fbxo22	71999	chr9:55208935-55224433:+	49.9211	52.4596	46.9222	47.1884	48.5573	41.5957	45.38	39.0197	51.753	44.48	41.5596	54.8243
Atad3a	108888	chr4:155740640-155761098:-	49.8907	54.327	50.0624	51.301	36.0104	19.9171	38.1617	21.9195	50.6863	41.4699	23.5191	48.9572
Nfu1	56748	chr6:87009836-87028461:+	49.8735	52.3439	55.0333	46.6012	32.028	25.6994	39.8477	24.518	46.8964	44.8344	22.7078	48.9891
Cgrrf1	68755	chr14:46832244-46854190:+	49.8588	51.9741	53.4643	43.7197	40.819	30.2216	42.6962	30.6353	51.0295	45.485	28.2675	51.3838
Gstm7	68312	chr3:107926334-107931817:-	49.8501	36.6972	45.8037	59.8843	41.526	15.2552	44.3299	28.7109	45.7646	42.9338	4.99806	37.5091
Lsm4	50783	chr8:70673231-70678752:+	49.8451	47.3864	50.9819	46.3145	34.2492	33.8999	43.1752	27.8911	43.0649	50.5397	37.6074	46.8233
Eef1d	66656	chr15:75894796-75909556:-	49.8299	47.5697	55.1189	48.7372	36.3993	33.831	45.9499	32.2799	49.6998	55.0198	39.0696	45.6491
Naa38	78304	chr11:69395791-69396671:+	49.8113	51.1534	54.3151	39.3118	35.6713	29.0742	44.8407	29.5653	47.4902	46.3692	24.407	42.2057
Glyr1	74022	chr16:5013902-5049910:-	49.8105	57.4782	51.5631	54.7896	47.9871	47.8418	49.7249	44.4094	56.7165	50.1228	53.2755	60.4496
Trappc3	27096	chr4:126262405-126275883:+	49.8053	45.6013	47.3069	42.0579	37.0625	30.6986	40.6778	33.0033	47.9571	45.5836	38.9356	42.9834
Hdac11	232232	chr6:91156815-91174683:+	49.8039	55.7581	51.8126	43.7223	32.6931	11.5182	35.6521	18.5312	39.5326	38.9666	6.37181	39.4601
Tmem63b	224807	chr17:45660177-45686218:-	49.7495	51.177	47.056	53.4047	39.6603	21.7336	36.4454	28.303	41.3466	36.6456	22.051	44.0681
Stard4	170459	chr18:33199138-33213862:-	49.7183	52.7715	54.5097	62.3371	44.5981	29.2072	38.3226	29.9822	40.4009	24.0098	31.3504	42.5791
Enpp3	209558	chr10:24773814-24836195:-	49.6935	53.6357	36.7145	60.3606	63.0801	41.1162	55.1665	65.6963	45.4006	37.251	32.2495	55.452
Sdf2	20316	chr11:78245746-78255496:+	49.6889	46.6968	52.0217	49.6897	40.9744	35.1371	50.2484	36.7706	53.1852	50.4329	37.5977	49.3627
Ergic1	67458	chr17:26561512-26656933:+	49.675	53.9398	52.3483	45.507	40.9644	29.2622	46.6768	33.1239	46.5253	42.3471	28.7036	49.886
Csrp3	13009	chr7:48830398-48848051:-	49.6446	58.6551	44.2472	21.0974	35.7417	26.3705	52.6034	29.9406	36.3561	44.7626	11.7304	38.9117
Ogdh	18293	chr11:6291597-6359094:+	49.5963	51.5768	52.0193	54.4898	40.6937	36.13	53.6731	38.2822	47.2865	42.0882	39.3101	55.6897
Pcsk9	100102	chr4:106442334-106464325:-	49.4847	61.5049	51.9202	63.3757	71.8449	47.8064	43.839	40.3899	52.1551	28.3888	37.2863	39.1474
Mrpl36	94066	chr13:73331009-73332178:+	49.4777	50.5612	52.9636	46.9726	40.2273	33.3161	43.0542	31.3164	52.6023	50.5335	29.5902	46.2145
Dmac1	66928	chr4:75277354-75278286:-	49.4503	48.6982	62.2449	43.0647	34.2973	32.3513	45.2683	30.0735	52.5013	46.2003	28.5767	44.4939
Snrnp70	20637	chr7:45376454-45395742:-	49.4495	44.4566	48.6191	47.1704	42.339	41.7155	40.4068	41.9519	49.6779	47.9905	41.3504	45.4725
Anapc5	59008	chr5:122787461-122821342:-	49.4158	56.8256	56.9695	54.1855	49.1232	37.0465	60.2856	38.5321	53.5762	48.5257	38.62	48.1565
[truncated: 13,853 more rows]

## Sheet: rlog, all samples
geneSYM	geneID	mm10 coordinates	CLPDCA-rep1	CLPDCA-rep2	CLPDCA-rep3	CLPDCA-rep4	CLP-rep1	CLP-rep2	CLP-rep3	CLP-rep4	Sham-rep1	Sham-rep2	Sham-rep3	Sham-rep4
Alb	11657	chr5:90460870-90476602:+	19.8299	19.7583	19.2292	19.9594	19.6305	19.2227	19.6566	19.5872	20.1691	20.1366	20.3264	20.5244
Trf	22041	chr9:103208876-103230286:-	19.3892	19.537	20.1734	19.4451	19.7521	20.2342	19.4264	20.1717	19.355	19.2653	19.3087	19.3887
C3	12266	chr17:57203967-57228136:-	19.2164	19.249	19.6872	19.2592	19.6597	19.9211	19.392	19.8914	18.9981	19.0763	18.9726	19.2266
Hpx	15458	chr7:105591611-105600116:-	19.4509	19.6693	20.406	19.3663	19.9867	20.5147	19.6182	20.4158	19.1241	19.0129	19.041	19.1471
Serpina1e	20704	chr12:103946932-103956897:-	18.2515	18.2152	18.0388	18.5247	18.7318	18.5849	18.2309	18.6796	18.641	18.2144	18.201	18.8278
Hp	15439	chr8:109575128-109579172:-	19.1172	19.4421	19.7975	19.0119	19.6205	20.0151	19.3237	19.9681	18.8308	18.9293	18.8871	18.756
Apoe	11816	chr7:19696244-19699188:-	18.5328	18.6514	17.849	18.6131	18.2861	17.9882	18.3467	18.0382	18.7262	18.751	18.8269	18.6784
Fga	14161	chr3:83026153-83033617:+	18.6478	18.827	19.8533	18.6754	19.1593	19.7161	18.9305	19.5554	18.4864	18.454	18.2698	18.6114
Fgb	110135	chr3:83042246-83049863:-	18.6016	18.8308	19.534	18.6035	19.042	19.4991	18.7708	19.2918	18.36	18.3681	18.16	18.5343
Serpina3k	20714	chr12:104338486-104345739:+	18.574	18.363	19.0415	18.6529	19.0362	19.2615	18.8264	19.185	18.4987	18.3436	18.3732	18.499
Fgg	99571	chr3:83007724-83015056:+	18.2663	18.4887	19.3067	18.2965	18.6946	19.1732	18.4838	19.0015	18.0748	18.05	17.866	18.1876
Pzp	11287	chr6:128483567-128526720:-	17.9644	18.028	18.5784	18.1757	18.4627	18.7407	18.1606	18.842	18.0252	18.0743	17.8433	18.1499
Itih4	16427	chr14:30886476-30901986:+	18.2249	18.4477	19.0288	18.342	18.5717	18.9214	18.4717	18.9635	18.0109	18.223	17.9991	18.1452
Ahsg	11625	chr16:22892015-22899451:+	18.0144	18.0398	17.7866	18.0364	18.1983	17.9897	17.9026	18.0686	18.0144	17.8464	17.9863	18.0871
Saa2	20209	chr7:46751833-46754314:+	18.2639	18.7262	19.499	18.1447	18.8353	19.7539	18.79	19.5905	17.9488	18.0302	18.0529	18.0312
Saa1	20208	chr7:46740497-46742980:-	18.2486	18.6923	19.2909	18.1599	18.7123	19.5399	18.7004	19.4238	17.957	18.0619	18.01	18.0241
Gc	14473	chr5:89417511-89457898:-	17.6108	17.6907	17.4351	17.6805	17.6429	17.5256	17.5425	17.6849	17.6617	17.686	17.6884	17.749
Selenop	20363	chr15:3270767-3280510:+	17.7391	17.7529	16.9325	17.8512	17.5721	16.9957	17.5898	17.2421	17.7312	17.7594	17.7405	17.7028
Apoa1	11806	chr9:46228630-46230469:+	17.6777	17.7546	17.069	17.6718	17.6965	17.343	17.5656	17.477	17.6689	17.5668	17.7797	17.6725
Apob	238055	chr12:7977677-8016839:+	17.4142	17.3622	17.5419	17.6624	17.83	17.7256	17.6572	17.9279	17.6186	17.6961	17.5066	17.6323
Mat1a	11720	chr14:41105033-41124428:+	17.3987	17.3502	17.361	17.3358	17.5812	17.7465	17.4019	17.4717	17.0588	17.0931	16.8611	17.3189
Cyp2e1	13106	chr7:140763832-140774977:+	17.5841	17.6332	15.8229	17.7216	17.5339	16.3162	17.7017	16.6893	17.7556	17.7505	17.6782	17.301
Mup3	17842	chr4:62083476-62087317:-	17.474	17.5897	16.9675	17.6575	17.2111	16.9545	17.3206	17.1621	17.8137	17.7586	17.7421	17.2857
Eef1a1	13627	chr9:78478454-78481724:-	16.8412	16.8846	16.8211	16.9445	16.8257	16.7879	16.8521	16.7937	16.9219	16.9449	17.0296	17.0489
Serpina1b	20701	chr12:103728156-103738189:-	16.5996	16.662	16.1827	16.7845	16.6127	16.4399	16.47	16.5369	16.8252	16.7347	16.9397	16.9587
Vtn	22370	chr11:78499120-78502325:+	17.0203	17.1412	17.1255	17.0201	17.0173	17.0752	17.0434	17.1714	16.9015	16.911	16.8725	16.9447
Apoa2	11807	chr1:171221564-171226379:+	16.8681	17.0441	15.9798	16.8239	16.5056	16.2218	16.7562	16.314	17.0399	17.1355	17.245	16.8996
Cps1	227231	chr1:67123027-67231267:+	16.4103	15.8652	14.698	16.463	16.2648	15.6371	15.8747	15.7286	16.6615	16.1788	16.196	16.8615
Mup20	381530	chr4:62050235-62054117:-	16.6403	16.7842	15.8437	16.6281	16.7253	16.2426	16.4919	15.8996	16.9153	16.7093	16.9877	16.8357
Serpina1c	20702	chr12:103894926-103904950:-	16.7891	16.8848	16.4307	16.8812	16.6804	16.5195	16.754	16.6998	16.8293	16.7964	17.0434	16.8001
Kng1	16644	chr16:23058300-23082078:+	16.6293	16.7991	16.5252	16.6858	16.7637	16.6449	16.452	16.7861	16.719	16.6003	16.663	16.7926
Ambp	11699	chr4:63143275-63154172:-	16.995	17.2955	17.1046	17.0334	17.0546	17.156	16.9907	17.2854	16.8633	16.7933	16.8363	16.7904
Itih3	16426	chr14:30908574-30923587:-	16.91	16.9887	17.267	16.9176	17.2673	17.4303	16.9158	17.5281	16.6325	16.5807	16.5179	16.7303
Orm1	18405	chr4:63344556-63348163:+	17.3822	17.697	18.2427	17.1595	17.9251	18.4681	17.6791	18.3641	16.8851	16.7889	16.8269	16.68
Ttr	22139	chr18:20665250-20674326:+	16.5721	16.601	16.0294	16.5357	16.2793	16.0807	16.4004	16.2407	16.6238	16.6058	16.7602	16.6641
Mug1	17836	chr6:121838541-121889057:+	16.6146	16.4001	16.3545	16.8168	17.1799	16.7606	16.6626	17.2255	16.8069	16.6574	16.5773	16.6389
Plg	18815	chr17:12378609-12419384:+	16.6062	16.6356	16.4514	16.6911	16.7588	16.6582	16.6176	16.7594	16.6279	16.566	16.5314	16.6376
Aldob	230163	chr4:49535993-49549546:-	16.4938	16.5096	16.2979	16.6069	16.3033	16.1007	16.3463	16.2203	16.4342	16.5188	16.5394	16.5532
Pck1	18534	chr2:173153073-173159253:+	16.6454	16.7199	16.1449	16.766	16.0678	15.895	16.3844	16.122	16.2595	16.2931	16.3545	16.4431
Mgst1	56615	chr6:138140537-138156754:+	16.4558	16.4983	16.3828	16.4458	16.3102	16.3189	16.4861	16.2389	16.5563	16.5889	16.5398	16.3281
Scp2	20280	chr4:108043830-108118547:-	16.0549	16.0277	15.6798	16.3289	16.0038	15.8762	16.0575	15.915	16.2849	16.3875	16.2626	16.2675
C4b	12268	chr17:34728381-34743897:-	16.1467	16.2414	15.9854	16.3504	16.3702	16.1094	16.2099	16.4157	16.3698	16.3686	16.1712	16.257
Serpina3n	20716	chr12:104406708-104414329:+	16.7743	16.9706	18.127	16.7191	17.2933	18.0069	17.0613	17.7993	16.1861	16.1981	16.2008	16.2394
Rnase4	58809	chr14:51091077-51106151:+	16.2617	16.2791	15.2409	16.182	16.1169	15.6349	16.1469	15.7724	16.2101	16.0881	16.0302	16.222
Ftl1	14325	chr7:45457944-45459886:-	16.0562	16.1612	15.7811	16.0169	15.8316	15.7511	15.8526	15.5666	16.1443	16.123	16.2558	16.1769
Scd1	20249	chr19:44394450-44407709:-	14.4261	14.2988	14.6421	14.6267	13.1678	13.0799	14.4312	13.8949	15.267	15.3603	15.4272	16.1706
Serpina1d	20703	chr12:103763587-103773633:-	15.6695	15.6758	15.0657	15.887	15.5584	15.2765	15.5069	15.4304	15.9737	15.818	16.061	16.1656
Acox1	11430	chr11:116171883-116199045:-	15.9867	16.1567	16.2428	16.4195	15.8631	15.9508	16.211	15.8767	16.1618	16.4271	16.2925	16.1402
Fn1	14268	chr1:71585473-71653234:-	16.3722	16.3856	17.1463	16.4242	16.7246	17.1888	16.4925	17.1331	16.1368	16.2432	16.0311	16.1141
Fgl1	234199	chr8:41191434-41215156:-	16.2242	16.3883	16.5387	16.2291	16.465	16.5957	16.3715	16.5933	16.1894	16.1449	16.0139	16.1076
Serpina1a	20700	chr12:103853295-103863619:-	15.8523	15.9768	15.5116	15.909	15.9228	15.8022	15.7995	15.8597	15.938	15.8417	16.0387	16.0727
Clu	12759	chr14:65968483-65981548:+	16.1124	16.2892	16.0521	16.2124	16.1496	16.2562	16.0736	16.2433	16.0462	16.0517	15.9784	16.0475
Apoh	11818	chr11:108395297-108414396:+	15.9252	15.9165	15.5014	15.8567	15.8858	15.7625	15.9141	15.9929	15.8539	15.8267	15.8795	15.9818
Tat	234724	chr8:109990436-109999804:+	16.4099	16.3173	16.1806	16.1424	15.3137	16.1316	15.524	15.5897	15.9576	15.9491	15.7207	15.9755
F2	14061	chr2:91625320-91636457:-	15.784	15.8762	15.6084	15.919	15.8288	15.7386	15.7777	15.9019	15.8891	15.8977	15.8653	15.9644
Lrg1	76905	chr17:56119678-56121946:-	16.4518	16.7249	16.7768	16.3657	16.6003	16.9205	16.6739	16.9112	16.0394	16.2131	16.146	15.9299
Ces1c	13884	chr8:93099016-93131283:-	15.4678	15.3814	14.2817	15.489	14.8192	14.1002	14.9906	14.3159	15.7956	15.7108	15.7898	15.9143
Slc38a3	76257	chr9:107651155-107668968:-	15.4546	15.4084	14.9343	15.6296	15.4107	15.1608	15.2887	15.387	15.6076	15.5473	15.4386	15.9024
Rbp4	19662	chr19:38116620-38125321:-	15.8559	15.9307	14.6259	15.9245	15.7559	14.9051	15.7813	15.2739	16.0091	15.9903	16.1443	15.8983
Serpinc1	11905	chr1:160978606-161003014:+	15.7069	15.7617	15.3244	15.7753	15.716	15.489	15.5664	15.6227	15.8248	15.7283	15.8098	15.8813
Cat	12359	chr2:103453904-103485153:-	15.6939	15.5793	14.2218	15.8876	15.5551	14.4962	15.6383	14.9668	15.9967	15.9428	15.9894	15.879
P4hb	18453	chr11:120560304-120572936:-	15.9523	16.0295	16.484	15.94	16.2168	16.6114	16.078	16.5007	15.9913	16.0288	16.1434	15.8778
Apoc1	11812	chr7:19689480-19692659:-	15.6897	15.9062	15.0321	15.6779	15.3495	15.0888	15.4908	15.2603	15.8298	15.8315	15.9903	15.85
Cfh	12628	chr1:140085855-140183411:-	15.7823	15.9281	16.0547	15.976	16.2994	16.1884	15.896	16.4643	15.9013	15.9325	15.5997	15.8324
Cp	12870	chr3:19957054-20009750:+	15.9375	16.1326	17.4459	15.9397	16.7418	17.5791	16.4402	17.5016	15.9325	15.858	15.7514	15.78
Hc	15139	chr2:34983331-35061441:-	15.4554	15.363	14.5947	15.7381	15.546	14.9586	15.3081	15.3283	15.6239	15.551	15.3567	15.7212
Eef2	13629	chr10:81176631-81182509:+	15.4672	15.4606	15.4919	15.6729	15.521	15.4469	15.5651	15.4248	15.5423	15.5787	15.6547	15.6978
Uox	22262	chr3:146597149-146631483:+	15.0374	15.0214	14.5246	15.242	14.6499	13.9463	14.8254	14.5975	15.2312	15.4135	15.2331	15.6955
Nat8f2	93673	chr6:85865422-85869137:-	15.5376	15.5358	15.4329	15.7066	15.5203	15.4769	15.4594	15.4791	15.7936	15.7814	15.5698	15.6786
Adh1	11522	chr3:138277645-138290691:+	15.6557	15.6108	13.6461	15.5948	15.2632	13.3328	15.5841	14.4573	15.7794	15.7858	15.9701	15.66
H2-Q10	15007	chr17:35470089-35474563:+	15.4275	15.5344	15.2091	15.4835	15.2868	15.266	15.3162	15.2181	15.7492	15.6688	15.7551	15.6494
Cyp3a11	13112	chr5:145854607-145879854:-	14.3453	14.0497	11.9643	14.4934	14.0323	11.6391	13.8956	11.6841	15.2993	15.1017	15.808	15.6271
Igfbp4	16010	chr11:99041260-99052643:+	15.6635	15.7369	15.2811	15.7279	15.5782	15.465	15.5777	15.4514	15.5455	15.6332	15.6028	15.6081
Cfb	14962	chr17:34856374-34862514:-	15.762	15.8579	16.3853	15.8416	15.9207	16.5596	15.8379	16.5313	15.722	15.7126	15.6051	15.5908
Phyh	16922	chr2:4918996-4938743:+	15.3317	15.3366	14.8804	15.5028	15.2242	15.0774	15.2992	15.1058	15.5761	15.5308	15.5649	15.5462
Arg1	11846	chr10:24915207-24927470:-	15.6242	15.4264	15.7296	15.4662	15.6327	16.0521	15.5353	15.8316	15.4488	15.2369	15.2207	15.5327
Slc38a4	69354	chr15:96994823-97055956:-	15.0922	14.9996	14.3775	15.4361	14.8436	14.4616	14.9132	14.762	15.2863	15.291	15.1606	15.4806
Apoa5	66113	chr9:46268608-46271921:+	15.3627	15.4575	15.6246	15.5345	15.124	14.9437	15.3247	14.906	15.225	15.3652	15.5442	15.4761
Gnmt	14711	chr17:46725664-46729165:-	14.9422	14.6511	13.3766	15.0176	14.502	13.9656	14.4853	13.9513	14.9919	14.7367	14.8821	15.4478
Azgp1	12007	chr5:137981521-137990232:+	15.3042	15.4909	14.8633	15.3602	15.3187	15.1464	15.2746	15.3323	15.4514	15.4043	15.4428	15.4445
Itih2	16425	chr2:10094591-10130683:-	15.0116	14.9284	15.6315	15.1586	15.3055	15.809	14.9971	15.3598	15.1296	15.0367	14.9964	15.437
Serping1	12258	chr2:84765360-84775429:-	15.4031	15.5821	15.3576	15.491	15.4813	15.5663	15.3687	15.6205	15.4079	15.4271	15.3388	15.436
Hmgcs2	15360	chr3:98280431-98310738:+	15.6011	15.7923	15.7277	15.8662	16.0184	15.9738	16.1873	16.1516	15.6414	16.0647	15.9812	15.4339
Hpd	15445	chr5:123171807-123182723:-	15.2635	15.1986	12.6787	15.3128	14.8807	13.6367	14.9568	14.2228	15.3493	15.2465	15.2668	15.4064
Fth1	14319	chr19:9980600-9985111:+	15.387	15.4142	15.5551	15.2324	15.1212	15.5393	15.3664	15.3438	15.3621	15.421	15.5713	15.3983
Rn45s	100861531	chr17:39842997-39848829:+	15.8318	15.7027	15.5992	15.5657	15.5269	15.7185	15.8843	15.7669	15.7177	15.5358	15.5375	15.3831
Tdo2	56720	chr3:81958414-81975728:-	15.1212	14.9194	14.3733	15.2173	15.0865	15.1447	15.2274	15.2153	15.1466	14.9734	15.0133	15.3629
Aldh1l1	107747	chr6:90550793-90599171:+	15.2488	15.0703	14.0286	15.2431	14.8015	14.336	14.7845	14.3915	15.3195	15.0637	15.1498	15.3263
Tmbim6	110213	chr15:99392947-99410049:+	15.1828	15.2694	14.9218	15.2521	15.0843	15.0665	15.1651	15.1076	15.2903	15.3643	15.3776	15.3156
Ces3a	382053	chr8:105048599-105058414:+	15.4363	15.2885	13.7488	15.5928	15.1759	14.0644	15.2197	14.5255	15.7275	15.5337	15.5702	15.3019
Errfi1	74155	chr4:150853796-150868889:+	15.4061	15.4669	15.3736	15.4234	15.3753	15.4462	15.3675	15.2556	15.1893	15.421	14.8519	15.2808
Dhcr24	74754	chr4:106561038-106589113:+	15.2196	15.1215	14.8011	15.3342	15.7119	15.316	15.3498	15.4871	14.9901	15.2845	14.9312	15.2746
C8a	230558	chr4:104815680-104876398:-	15.1301	15.2138	14.6282	15.301	15.0665	14.8459	15.0297	15.05	15.2544	15.3272	15.1361	15.2669
Aldh2	11669	chr5:121566027-121593824:-	14.9908	15.0361	14.6896	15.1601	14.7602	14.7442	14.9241	14.7396	15.2974	15.366	15.3579	15.238
Hrg	94175	chr16:22951072-22961659:+	15.1532	15.2187	14.2554	15.2744	15.1236	14.5128	14.987	14.8939	15.2065	15.0747	15.237	15.2101
Serpinf2	18816	chr11:75431736-75439501:-	15.2396	15.3276	14.9831	15.2691	15.3179	15.0873	15.229	15.192	15.1199	15.1209	15.0778	15.2035
Lrp1	16971	chr10:127538158-127621148:-	15.089	15.0787	14.9917	15.2854	15.4257	15.1999	15.2861	15.4735	15.1293	15.2972	14.9703	15.1843
Mt1	17748	chr8:94179089-94180327:+	14.9214	15.4409	16.2843	14.6629	15.2675	16.1903	15.6741	15.8542	14.3355	14.9643	13.9713	15.1614
Rdh7	54150	chr10:127884027-127888733:-	15.0823	15.106	14.696	15.1157	15.1485	14.8274	15.1516	15.0045	15.157	15.1782	15.2106	15.1532
Fabp1	14080	chr6:71199888-71205023:+	14.9919	15.3442	14.1227	15.2112	14.9106	14.2154	15.6561	14.8285	15.5139	15.8358	16.0221	15.1325
Calr	12317	chr8:84842088-84846931:-	15.0352	15.2887	15.6613	15.0043	15.4155	15.801	15.1272	15.7131	15.2325	15.1483	15.261	15.1009
Pgrmc1	53328	chrX:36598193-36606079:+	14.9454	14.9878	14.2116	15.0179	14.6159	14.2567	14.8188	14.2968	15.1552	15.1862	15.2383	15.0795
Gpx1	14775	chr9:108339080-108340344:+	15.1774	15.3511	14.3574	15.2967	14.8359	14.4036	14.9434	14.2568	15.3073	15.3542	15.4564	15.0526
Glud1	14661	chr14:34310727-34345033:+	15.1209	15.0092	14.323	15.0463	15.1231	14.5765	15.1231	14.655	15.0944	15.1597	15.1466	15.0516
Fbp1	14121	chr13:62864753-62888282:-	14.6396	14.681	15.6648	14.8918	14.686	15.7497	14.7932	15.0066	14.7559	14.8873	14.7145	15.051
Ndrg2	29811	chr14:51905271-51913488:-	14.9955	14.9675	13.5457	15.1428	14.8265	13.9771	15.0071	14.2401	15.1372	15.1481	15.1618	15.017
B2m	12010	chr2:122147687-122153082:+	15.0776	15.0885	14.2352	15.0719	14.5151	14.1931	14.684	14.3793	15.1798	15.027	15.0679	15.0123
Apoc3	11814	chr9:46233050-46235636:-	14.6614	14.8663	14.3603	14.827	14.4939	14.4207	14.5477	14.4186	15.0106	14.9083	15.1672	15.006
Cdo1	12583	chr18:46713193-46728502:-	15.1717	15.0658	14.6117	14.7961	15.2562	15.3456	15.1855	15.2346	15.1829	15.0728	15.0596	14.9844
Pigr	18703	chr1:130826684-130852249:+	14.7033	14.7339	13.0764	14.9669	14.3561	13.2671	14.3489	13.9347	14.9169	14.9873	14.9364	14.9709
Col18a1	12822	chr10:77052179-77166530:-	14.8199	14.8469	14.2959	14.9574	14.9611	14.6931	14.8605	15.0251	14.9489	14.9102	14.9189	14.9614
Hamp	84506	chr7:30942369-30944029:-	14.1152	14.6584	14.8973	14.2201	14.2948	14.3655	13.926	14.5848	14.5507	14.3931	14.6265	14.9494
Ahcy	269378	chr2:155059312-155074497:-	14.8289	14.7437	14.3138	14.9722	14.7663	14.5146	14.7469	14.5751	14.7826	14.7182	14.8454	14.9476
Hsp90b1	22027	chr10:86690841-86705444:-	14.7516	14.9144	15.6015	14.8151	15.172	15.741	14.7935	15.5617	14.9942	14.9184	14.9264	14.9215
Sord	20322	chr2:122234839-122265337:+	14.8158	14.7458	12.7094	14.9519	14.5406	12.99	14.7105	13.7183	15.0305	15.1238	15.1235	14.9116
Mup7	100041658	chr4:60066469-60070475:-	15.9513	15.5332	15.8689	16.3637	16.0646	15.8641	15.8742	15.9073	16.5726	15.7409	16.3482	14.9035
Slc27a2	26458	chr2:126553024-126588243:+	14.8529	15.0769	14.1942	15.3591	15.0069	14.2306	15.2049	14.607	15.0251	15.1958	15.1192	14.893
Itih1	16424	chr14:30929180-30943289:-	14.7715	14.7978	14.7148	14.8606	14.9272	14.9813	14.7136	15.0648	14.88	14.7976	14.7832	14.8818
Sephs2	20768	chr7:127271879-127274059:-	14.8472	14.7844	13.961	14.9565	14.7424	14.2902	14.7753	14.5492	15.0137	14.8606	15.0231	14.8729
Slc27a5	26459	chr7:12988346-12998192:-	14.6022	14.614	13.7544	14.8543	14.4391	13.9562	14.4608	14.2403	14.8267	14.7661	14.8085	14.8269
H2-K1	14972	chr17:33996012-34000347:-	14.965	14.9542	14.7387	14.8717	14.6739	14.6835	14.7552	14.6477	14.9541	14.9456	14.9595	14.8212
Ldha	16828	chr7:46845804-46855627:+	14.9685	15.2845	15.401	15.0952	14.9441	15.2796	15.0744	15.1627	14.8296	15.0952	14.8664	14.8159
Hspa5	14828	chr2:34772090-34776529:+	14.9418	15.1053	15.6654	14.9045	15.3241	15.8944	14.811	15.687	14.9376	14.7314	14.9351	14.804
Atp5b	11947	chr10:128083307-128090388:+	14.5226	14.4739	14.3534	14.6781	14.4436	14.4093	14.6388	14.4073	14.7067	14.7164	14.7194	14.7989
Bhmt	12116	chr13:93616891-93637758:-	15.1538	14.6611	13.7369	15.1857	15.7639	14.4528	15.4106	14.9317	15.1226	14.9218	14.9404	14.7968
Prdx1	18477	chr4:116685599-116700000:+	14.674	14.754	14.4302	14.6473	14.4788	14.4449	14.5908	14.3248	14.7591	14.7622	14.7424	14.7869
Slc7a2	11988	chr8:40862367-40922070:+	14.0252	13.8033	13.5776	14.2428	13.5758	13.7202	13.7627	13.7191	14.2459	14.1354	13.8543	14.7678
Gsta3	14859	chr1:21240585-21265575:+	14.6357	14.216	12.1083	14.4179	13.7756	12.5508	14.2525	12.9503	14.8682	14.7776	14.876	14.7644
Hsp90ab1	15516	chr17:45567778-45573261:-	14.7973	14.5594	14.2874	14.8611	14.4782	14.1683	14.6623	14.1438	14.6643	14.5991	14.7299	14.7635
Cfi	12630	chr3:129836739-129875332:+	14.4246	14.4812	14.0724	14.5892	14.4397	14.2307	14.3317	14.475	14.5776	14.5371	14.4288	14.7466
Gstm1	14862	chr3:108012250-108017973:-	14.277	13.9698	12.6426	13.9463	13.187	12.4206	13.7155	12.3943	14.4932	14.3914	14.891	14.7357
Cyp2d26	76279	chr15:82790107-82794245:-	14.9471	15.0348	14.2255	14.9781	14.8526	14.5537	15.0054	14.8854	14.821	14.9781	15.0591	14.7281
Qsox1	104009	chr1:155778155-155812899:-	14.9147	15.0115	15.0384	14.9562	15.0405	15.1369	14.9685	15.0403	14.72	14.719	14.7081	14.7182
Tpt1	22070	chr14:75845256-75848303:+	14.764	14.9211	14.8346	14.6277	14.7285	14.782	14.7498	14.7726	14.7152	14.7122	14.8282	14.6997
Pah	18478	chr10:87521795-87584137:+	14.2964	13.9792	11.6796	14.3988	13.5521	12.0627	13.6963	12.6455	14.5252	14.2553	14.4111	14.6874
C4bp	12269	chr1:130635921-130661618:-	14.7335	14.8201	15.2193	14.8052	15.074	15.4055	14.9081	15.379	14.6849	14.7569	14.5309	14.6849
Lcn2	16819	chr2:32384637-32387739:-	15.769	15.8411	17.5963	15.2493	16.5758	17.983	16.5237	17.7215	14.6055	14.692	14.7084	14.6603
Mug2	17837	chr6:122006798-122085967:+	13.9886	13.9709	14.1947	14.2926	14.1934	14.4274	13.9355	14.6743	14.3192	14.2583	14.2365	14.6584
Ctsl	13039	chr13:64361890-64370520:-	14.5666	14.5979	15.1711	14.551	14.8295	15.2827	14.576	14.8314	14.4511	14.2413	14.1386	14.6518
Cyp2d9	13105	chr15:82452377-82456827:+	15.1354	14.9037	14.5693	15.2302	15.2027	14.6488	15.2931	14.7156	15.3195	15.1798	15.204	14.6124
Sardh	192166	chr2:27188393-27247303:-	14.3707	14.3401	12.7473	14.6251	14.1116	13.3036	14.1066	13.7004	14.5765	14.5697	14.5662	14.5907
Hspa8	15481	chr9:40801273-40805199:+	14.8292	14.753	14.0324	14.8487	14.5402	14.1761	14.6088	14.1355	14.5248	14.4162	14.4337	14.5147
Stard10	56018	chr7:101321319-101346312:+	14.4941	14.6522	14.1275	14.4978	14.4377	14.4459	14.4399	14.4202	14.5044	14.5834	14.662	14.5127
Atp5a1	11946	chr18:77773768-77782868:+	14.3072	14.2327	14.0752	14.4523	14.1729	14.12	14.3483	14.0747	14.441	14.4527	14.4962	14.4924
Hnf4a	15378	chr2:163506857-163572907:+	14.3579	14.4474	14.5889	14.3789	14.5339	14.588	14.4609	14.4364	14.5409	14.4772	14.4229	14.4537
Cpb2	56373	chr14:75242287-75283553:+	14.5341	14.724	15.3661	14.5728	14.8162	15.3345	14.683	15.2012	14.5147	14.4289	14.5336	14.4494
Apcs	20219	chr1:172893961-172895054:-	15.2889	15.4922	16.2609	14.8615	15.9303	16.3755	15.5525	16.3684	14.4814	14.3425	14.2348	14.4448
Apof	103161	chr10:128267997-128270151:+	14.6391	14.6998	14.4969	14.6489	14.6641	14.502	14.5337	14.5978	14.5491	14.4966	14.4464	14.4285
Agt	11606	chr8:124556587-124569707:-	14.5194	14.5068	14.26	14.4158	14.3811	14.25	14.3956	14.4315	14.2954	14.3046	14.3096	14.4218
Serpina3m	20717	chr12:104387164-104394257:+	14.8893	14.8779	15.8034	14.7436	15.2652	15.9064	15.1501	15.6833	14.3645	14.5039	14.3659	14.4153
H6pd	100198	chr4:149979474-150009023:-	14.2716	14.3342	14.8947	14.4984	14.7465	14.9157	14.5953	14.782	14.3785	14.429	14.3699	14.4064
Slco1b2	28253	chr6:141629518-141686635:+	14.5085	14.3771	13.3187	14.6572	14.6626	13.5033	14.6941	14.1704	14.7525	14.7744	14.4865	14.4045
Itm2b	16432	chr14:73362232-73385271:-	14.349	14.4441	13.515	14.4644	14.0536	13.6891	14.2055	13.8364	14.5413	14.5195	14.5297	14.4033
Serpina10	217847	chr12:103616675-103631444:-	14.6368	14.9434	14.8064	14.6521	14.6416	14.6285	14.5453	14.7348	14.3312	14.4142	14.213	14.3761
Egfr	13649	chr11:16752203-16913907:+	14.1162	14.0303	14.3068	14.3975	14.3647	14.6754	13.9879	14.4895	14.3286	13.9666	14.044	14.3734
Cbs	12411	chr17:31612623-31637205:-	13.9707	13.9217	13.6663	13.8856	13.8093	13.6948	13.7705	13.7481	14.0255	13.9418	13.8906	14.3693
Cyp2c29	13095	chr19:39287085-39330713:+	14.0119	13.6289	10.8663	13.9978	12.8553	10.4942	13.2752	10.943	14.6671	14.2691	14.3587	14.3666
C9	12279	chr15:6445333-6498476:+	13.9676	13.9308	12.8263	14.4022	13.9945	13.2583	14.0102	13.6589	14.4459	14.2151	14.1213	14.3467
Acaa2	52538	chr18:74779212-74806207:+	14.2933	14.3882	13.8059	14.4381	14.2243	13.9592	14.5082	14.189	14.3892	14.5914	14.5709	14.3408
Gstp1	14870	chr19:4035411-4037912:-	14.1729	13.8639	13.645	14.1459	14.1241	14.1512	14.0971	14.0988	14.4325	13.9509	14.2346	14.3388
Saa4	20211	chr7:46727992-46732603:-	15.2463	15.3673	14.4988	15.2068	15.1737	15.0005	15.181	15.2229	14.8269	14.8574	14.4232	14.2935
Sod1	20655	chr16:90220742-90226324:+	14.1511	14.3105	13.7595	14.1388	13.8281	13.7894	14.1026	13.7512	14.3578	14.4319	14.5046	14.2904
Mettl7b	71664	chr10:128958277-128960988:-	14.3218	14.3328	13.7054	14.371	14.0042	13.742	14.2584	13.7561	14.3087	14.3443	14.4625	14.2901
Pdia3	14827	chr2:121413902-121438686:+	14.1282	14.3555	14.775	14.1777	14.5267	14.8804	14.2494	14.8396	14.4125	14.3644	14.3729	14.2883
Lamp2	16784	chrX:38401357-38456460:-	14.2246	14.211	13.9642	14.3042	14.2123	14.0611	14.2641	14.1782	14.2843	14.3033	14.1537	14.2875
Oat	18242	chr7:132557475-132576398:-	13.688	13.7588	12.3726	14.1156	13.1193	12.966	13.6261	12.8045	14.0589	14.0261	13.8035	14.2846
Lamp1	16783	chr8:13159161-13175338:+	14.1695	14.1986	13.9248	14.231	14.1701	14.1255	14.155	14.0769	14.2368	14.2526	14.224	14.2763
Cpn2	71756	chr16:30256379-30267532:-	14.2039	14.2235	13.3748	14.395	14.1432	13.6263	14.0845	13.9494	14.1029	14.1094	14.0012	14.2463
Apon	28194	chr10:128254131-128255901:+	14.5445	14.7044	14.5325	14.5828	14.508	14.5222	14.5381	14.6179	14.3282	14.3411	14.2396	14.2406
Crot	74114	chr5:8966048-8997146:-	14.1086	14.2363	14.3876	14.3598	14.301	14.2569	14.5962	14.2848	14.3349	14.5601	14.3808	14.2373
Eif4g2	13690	chr7:111067985-111083030:-	14.1114	14.0737	14.399	14.146	14.0877	14.2485	14.148	14.1338	14.1055	14.1871	14.093	14.2142
Cyp2f2	13107	chr7:27119955-27133660:+	13.7927	13.6367	11.6659	14.335	13.0694	11.8221	13.0274	12.1078	14.2824	14.0878	14.4377	14.2085
Cyp3a25	56388	chr5:145977194-146009618:-	13.6363	13.3773	11.7428	13.5815	13.4719	12.6193	13.3036	12.6235	14.4394	13.8914	14.4607	14.2043
Tfr2	50765	chr5:137569840-137588081:+	14.1947	14.2571	14.0123	14.2875	14.247	14.0984	14.1943	14.2589	14.2373	14.29	14.1987	14.1971
Ugt2b5	22238	chr5:87124947-87140340:-	13.9656	13.8744	13.2127	14.0598	13.8364	13.2179	13.9751	13.4205	14.2807	14.3204	14.2599	14.1955
Fmo5	14263	chr3:97628804-97655287:+	14.3568	14.4561	12.346	14.4553	13.508	12.7173	13.7567	13.2649	13.9989	14.0766	14.04	14.1863
Igf1	16000	chr10:87858265-87937047:+	14.0797	14.0074	13.9745	14.136	13.8792	13.9395	13.938	13.8957	14.1208	14.0335	14.1327	14.1781
Gapdh	14433	chr6:125161852-125166467:-	14.1376	14.0821	14.4871	14.1116	13.9589	14.3126	14.2381	13.9879	14.2222	14.2513	14.368	14.1742
Rgn	19733	chrX:20549818-20562087:+	14.1596	14.2292	11.811	14.1387	13.4488	11.9617	13.7397	12.3793	14.4971	14.4164	14.3242	14.168
Elovl2	54326	chr13:41182382-41220403:-	13.7684	13.6811	12.6772	13.9933	13.5649	12.7201	13.5268	12.9945	13.9622	13.9132	13.9397	14.1672
Serpind1	15160	chr16:17331371-17343574:+	14.0378	13.9165	12.6466	14.1021	14.0415	13.3858	13.901	13.9159	14.0585	13.9567	13.9846	14.1665
Akr1c6	83702	chr13:4434343-4457530:+	14.1227	13.9457	11.1694	14.0117	13.7209	11.6074	13.9856	12.5306	14.4887	14.3817	14.3657	14.1556
Fetub	59083	chr16:22918382-22939768:+	13.999	14.1727	14.1221	14.0593	13.9755	14.1627	13.9898	14.1465	14.1779	14.1276	14.1601	14.152
Aldh1a1	11668	chr19:20601982-20643462:+	14.6564	14.6732	13.8301	14.7488	14.5007	13.736	14.8729	14.1086	14.9233	15.1396	14.8883	14.1512
Gjb1	14618	chrX:101376376-101385629:+	14.0233	14.0001	13.486	14.0299	13.9883	13.6796	13.9843	13.771	14.1532	14.0461	14.1579	14.1499
Reep6	70335	chr10:80330145-80336441:+	14.3157	14.3468	13.5622	14.3658	14.2027	13.8065	14.3665	14	14.2859	14.4157	14.4576	14.145
Acsl1	14081	chr8:46471037-46536051:+	13.7829	13.6198	12.9904	14.2073	14.135	13.5871	14.3192	13.8799	14.1099	14.3512	14.5768	14.139
Cyp2j5	13109	chr4:96627432-96664119:-	13.994	13.9809	13.4595	14.1932	13.9224	13.4809	14.0832	13.9169	14.0881	14.1784	14.0585	14.1324
Ctsb	13030	chr14:63122462-63145923:+	14.1188	14.2599	13.3834	14.0699	13.7708	13.3045	13.9101	13.4562	14.0487	14.0375	14.0349	14.1307
Fah	14085	chr7:84585159-84605942:-	14.0823	14.1296	12.8992	14.1309	13.8682	13.2753	13.9199	13.6246	14.1087	14.0155	14.0946	14.1244
Mt2	17750	chr8:94172618-94173567:+	14.3898	15.0042	15.5133	14.1507	14.7568	15.5181	15.0748	15.0594	13.4756	14.1397	13.1729	14.1167
F5	14067	chr1:164151835-164220277:+	13.7085	13.6934	13.5699	14.0387	14.0289	13.8299	13.8465	14.0878	14.0647	14.0794	13.8216	14.1016
Nudt7	67528	chr8:114133574-114152312:+	13.7758	13.6525	13.4479	13.9504	13.1594	12.5283	13.3879	12.3195	14.5958	14.1711	14.4042	14.0975
Gstz1	14874	chr12:87147165-87164723:+	14.0878	14.138	13.193	14.1236	13.9769	13.6968	14.065	13.8676	14.1496	14.1621	14.1805	14.0879
Hdlbp	110611	chr1:93405940-93478917:-	14.0421	14.0089	14.3103	14.1555	14.2063	14.3572	14.0317	14.4023	14.0275	14.0554	14.0455	14.083
Rxra	20181	chr2:27677201-27763319:+	14.0196	14.0461	13.853	14.1351	14.1464	13.9435	14.0404	14.0072	14.0542	14.1423	14.0276	14.0762
Comt	12846	chr16:18406882-18426716:-	14.185	14.1861	13.3637	14.2293	13.8666	13.1369	14.1031	13.2862	14.3512	14.2979	14.4692	14.0726
Pcx	18563	chr19:4510472-4621752:+	14.0503	14.1845	14.2373	14.2082	14.1201	14.4371	14.1846	14.3577	14.12	14.3121	14.165	14.0679
Orm2	18406	chr4:63362449-63365877:+	14.6844	15.477	15.3905	14.5483	15.6909	15.86	15.0758	16.0161	14.2172	14.1517	14.0997	14.0588
Adk	11534	chr14:21052574-21448569:+	13.9747	13.9243	13.9961	13.9954	14.0464	14.0871	13.9611	14.1891	13.944	13.9433	13.8506	14.0563
Crp	12944	chr1:172698056-172699966:+	14.5369	14.6297	14.6307	14.3611	14.4641	14.0071	14.4042	14.4257	14.1891	14.0846	13.9396	14.0508
Gjb2	14619	chr14:57098602-57104702:-	13.9751	13.9877	14.1367	14.1573	14.069	13.9156	14.0511	14.0081	14.0184	14.0268	13.9437	14.0485
Cyb5a	109672	chr18:84851338-84879871:+	14.0762	14.1542	12.582	14.0307	13.6365	12.9241	13.8713	13.1802	14.2922	14.2412	14.341	14.0448
Lcat	16816	chr8:105939551-105943402:-	14.0923	14.2069	14.4192	14.1109	14.2457	14.575	14.2114	14.5708	13.9837	14.0635	14.0454	14.0406
Rpl4	67891	chr9:64173387-64178562:+	13.9741	14.0452	14.0761	13.8935	13.9036	14.0578	13.9778	13.9893	13.9876	13.9448	14.0959	14.0103
Cyp2d10	13101	chr15:82402846-82407194:-	14.0674	14.0907	13.2009	14.1137	13.9395	13.5107	13.9631	13.5707	14.168	14.1548	14.3183	14.0033
Hgd	15233	chr16:37580153-37632026:+	13.693	13.5752	12.1417	13.7903	13.3068	12.4053	13.3781	12.7478	13.861	13.7432	13.6808	13.9891
Fads1	76267	chr19:10182888-10196872:+	13.6311	13.4723	12.6829	13.5784	13.3358	13.1036	13.4088	13.1258	13.8423	13.7842	13.8872	13.9878
Kng2	385643	chr16:22985852-23029101:-	13.8157	13.916	14.0541	13.7639	13.8832	14.0272	13.6991	14.0458	13.7827	13.7048	13.7099	13.9819
Ttpa	50500	chr4:20008243-20030822:+	14.1014	14.1074	13.9797	14.1462	14.1249	13.9562	14.26	13.9388	14.0743	14.1572	13.9543	13.9817
1300017J02Rik	71775	chr9:103250530-103288297:-	13.7569	13.709	13.5872	13.9485	13.7715	13.7788	13.6927	13.8489	13.9721	13.885	13.8861	13.9655
Hal	15109	chr10:93488768-93516761:+	13.7767	13.5457	12.2471	13.7601	13.3899	12.6817	13.354	13.265	13.7502	13.5185	13.7592	13.9621
Mdh1	17449	chr11:21556692-21571934:-	13.6076	13.625	13.3088	13.7387	13.5674	13.5106	13.6302	13.5804	13.9087	13.8793	13.9105	13.9597
F12	58992	chr13:55417958-55426804:-	13.912	13.938	13.8669	13.9496	13.8702	13.9911	13.8297	13.9055	13.9954	13.9217	13.9825	13.9575
Asl	109900	chr5:130011258-130024381:-	13.9841	13.787	13.0107	13.9438	13.5603	13.6009	13.4937	13.4095	13.7612	13.5927	13.7337	13.9333
Wfdc21	66107	chr11:83746940-83752646:+	14.1493	14.3001	14.2506	14.0606	14.247	14.4832	14.2719	14.4811	14.0707	14.0698	14.1233	13.9329
Gls2	216456	chr10:128194635-128210004:+	13.3072	13.1941	12.1926	13.4153	12.8172	12.5565	12.8541	12.7318	13.3939	13.2776	13.325	13.9287
Dpyd	99586	chr3:118562178-119432918:+	13.3115	13.3089	12.8154	13.674	13.3931	13.0904	13.2998	13.2779	13.6954	13.701	13.5554	13.9278
Pon1	18979	chr6:5168090-5193946:-	13.9086	13.8533	11.9069	13.9656	13.6861	12.3695	13.7432	13.0847	14.1024	14.0673	14.0288	13.9264
Asgr1	11889	chr11:70054124-70057895:+	13.9642	14.0702	13.6788	13.9561	13.9147	13.75	14.047	13.8049	13.9916	14.039	14.0607	13.9075
Aox3	71724	chr1:58113136-58200452:+	13.5399	13.1107	10.7768	13.8428	13.7231	11.1338	13.4356	12.2927	14.0961	14.0223	14.1793	13.9023
Csad	246277	chr15:102176998-102189043:-	13.2697	13.066	13.3177	13.1632	13.8161	13.5038	13.4681	13.4987	13.6101	13.7594	13.4593	13.8969
Hspa9	15526	chr18:34937415-34954351:-	13.5726	13.5586	13.666	13.746	13.4729	13.4252	13.5116	13.2983	13.7152	13.7763	13.6977	13.8937
Glul	14645	chr1:153899929-153909723:+	14.4626	14.5248	12.7175	14.537	13.9934	12.577	14.3727	12.7008	14.3573	14.3265	14.1319	13.892
Abcb11	27413	chr2:69238282-69342616:-	13.479	13.4312	11.8999	13.594	13.5403	12.3799	13.4442	12.8614	13.9903	13.7573	13.908	13.8745
Dbi	13167	chr1:120113280-120121096:-	13.7788	13.995	13.6709	13.7028	13.5934	13.5682	13.8608	13.6867	13.9376	14.0388	14.1026	13.865
Cfhr2	545366	chr1:139810292-139858699:-	13.6711	13.5557	13.1258	13.764	13.6028	13.2397	13.607	13.6176	13.8313	13.6981	13.656	13.8588
Proz	66901	chr8:13060908-13076024:+	13.8713	13.9479	13.1193	13.9684	13.9126	13.3898	13.7906	13.7689	13.9183	13.9246	13.8279	13.8544
Ang	11727	chr14:51091077-51102009:+	13.9862	14.2339	13.3969	13.9114	14.0392	13.8396	13.8114	13.8423	13.9147	13.8178	13.8473	13.8453
Ephx2	13850	chr14:66084372-66124522:-	13.8894	13.9281	13.0982	14.2113	13.9587	13.2225	14.3226	13.6198	14.0708	14.2507	14.1893	13.8395
Rida	15473	chr15:34484022-34495246:-	13.5713	13.7287	12.1778	13.5593	13.0184	12.2332	13.3267	12.6226	13.768	13.754	13.937	13.8344
Ptms	69202	chr6:124913675-124917946:-	13.6464	13.6756	12.7622	13.6257	13.2775	12.8119	13.4273	12.9094	13.816	13.7934	13.9924	13.8223
Rpl10	110954	chrX:74270816-74273135:+	13.8024	13.8701	13.9466	13.6798	13.6816	13.8415	13.7379	13.7851	13.77	13.756	13.8852	13.82
Eif4g1	208643	chr16:20672727-20692883:+	13.7678	13.6739	13.9776	14.0023	13.9023	13.9065	13.7986	13.9435	13.789	13.8527	13.7405	13.8187
Slc39a14	213053	chr14:70303467-70351424:-	13.8174	13.9253	14.7535	13.8649	14.2229	14.4537	14.0126	14.4341	13.6531	13.7079	13.436	13.8164
Sdc4	20971	chr2:164424247-164443188:-	14.0672	14.1385	13.6394	13.9675	13.886	13.9206	13.916	13.734	13.8578	13.7421	13.8948	13.8134
Cyp3a13	13113	chr5:137892933-137921619:-	14.0346	14.037	12.9584	14.0341	13.9371	13.203	13.8811	13.7069	13.7239	13.7307	13.5792	13.812
C1s1	50908	chr6:124530344-124542359:-	13.9878	13.9723	13.448	14.0823	13.938	13.7259	13.8891	14.0191	13.9708	13.9256	13.8497	13.8087
F10	14058	chr8:13037308-13056676:+	13.7079	13.8589	13.2942	13.7434	13.6653	13.4014	13.6006	13.5902	13.8207	13.7577	13.8063	13.7933
Por	18984	chr5:135689145-135735326:+	13.7244	13.6008	13.0973	13.8092	13.5539	13.454	13.5948	13.0335	13.6077	13.5801	13.7056	13.7929
Pcyt2	68671	chr11:120610062-120617945:-	13.6471	13.6308	13.1526	13.5747	13.5503	13.288	13.5616	13.3749	13.7593	13.7948	13.8763	13.7909
Insig1	231070	chr5:28071412-28078662:+	13.4189	12.7055	13.0981	13.0771	13.5531	13.1341	13.1329	13.0808	13.6944	13.3879	13.7743	13.7892
Psap	19156	chr10:60277628-60302600:+	13.8026	13.8493	13.6683	13.8737	13.8319	13.9298	13.9525	13.8361	13.7995	13.8961	13.8133	13.7787
Alas1	11655	chr9:106233455-106247954:-	14.123	14.2017	12.6697	13.7244	13.2573	12.8321	13.5183	12.6005	13.1875	13.8217	13.7298	13.7741
Adipor2	68465	chr6:119353150-119417528:-	13.7288	13.7154	14.0434	13.8072	13.8772	14.1529	14.0727	13.882	13.9302	14.1014	14.0972	13.7704
Ghr	14600	chr15:3317755-3583352:-	13.6559	13.5625	12.7235	13.854	13.3302	12.8644	13.5367	13.1033	13.9119	13.9206	13.8478	13.7695
Proc	19123	chr18:32123126-32139570:-	13.6799	13.8155	12.9884	13.7568	13.5003	13.1891	13.5748	13.4028	13.8397	13.8095	13.8685	13.7614
Sc5d	235293	chr9:42254177-42264300:-	13.1734	12.9146	13.0188	13.2132	13.345	13.2216	13.1595	13.1034	13.7652	13.6649	13.7826	13.7606
Prdx6	11758	chr1:161240112-161251210:-	13.7918	13.7797	13.3044	13.8663	13.5543	13.3031	13.7251	13.4881	13.8348	13.9074	13.9202	13.7599
Rps2	16898	chr17:24720063-24721927:+	13.6747	13.8213	13.6747	13.6073	13.5351	13.671	13.703	13.5643	13.7989	13.7961	13.9597	13.7572
Rrbp1	81910	chr2:143947395-144011263:-	13.6001	13.6621	13.8716	13.5374	13.79	13.8857	13.5019	13.8981	13.5617	13.4405	13.6202	13.7549
Uroc1	243537	chr6:90333289-90364548:+	13.6082	13.4855	12.1479	13.6743	13.4101	12.6905	13.3848	13.2638	13.4738	13.484	13.48	13.7539
Hpn	15451	chr7:31098725-31115326:-	13.7954	13.8411	13.3255	13.8077	13.7912	13.5973	13.7928	13.6743	13.7987	13.8065	13.8223	13.7525
Ugt2b34	100727	chr5:86889770-86906937:-	13.6344	13.3269	11.9874	13.6906	13.4224	12.2745	13.5027	12.7715	13.9128	13.8587	13.8616	13.7395
Cyb5b	66427	chr8:107150661-107187470:+	13.4603	13.2586	12.9511	13.4343	13.3836	13.1354	13.3905	13.1927	13.7755	13.804	13.7344	13.7391
Ddx5	13207	chr11:106780355-106789185:-	13.6438	13.5215	13.6148	13.6301	13.5855	13.5142	13.5769	13.5307	13.6966	13.6522	13.5741	13.7363
Serpinf1	20317	chr11:75410029-75422623:-	13.3353	13.3111	12.4004	13.4912	12.95	12.3088	13.1054	12.6279	13.6267	13.5679	13.6682	13.7289
Rplp0	11837	chr5:115559467-115563729:+	13.8867	13.9569	14.1207	13.7494	13.8638	14.1228	13.9373	14.0046	13.8132	13.7697	13.8891	13.7281
C8b	110382	chr4:104766317-104804548:+	13.478	13.4738	12.9035	13.7166	13.4032	13.1649	13.245	13.3172	13.7261	13.6003	13.6459	13.7217
Angptl3	30924	chr4:99030954-99038192:+	13.4652	13.2493	11.3275	13.4355	13.0898	11.4716	13.1321	12.5368	13.5174	13.4302	13.3666	13.7151
Sec14l2	67815	chr11:4097040-4118729:-	13.6896	13.6631	13.091	13.7936	13.7171	13.4028	13.6821	13.5849	13.7872	13.8979	13.9667	13.7088
AI182371	98870	chr2:35081861-35100685:-	13.6005	13.526	12.4797	13.7124	13.5743	12.7858	13.5474	13.2461	13.6861	13.6189	13.6088	13.7058
Cd302	66205	chr2:60251993-60284484:-	13.6388	13.7825	13.8843	13.7325	13.6514	14.0834	13.5259	14.0344	13.7386	13.6124	13.5523	13.7008
Tmprss6	71753	chr15:78439667-78468634:-	13.5872	13.5742	12.2959	13.6425	13.403	12.6405	13.4884	12.9852	13.7076	13.7532	13.6901	13.6865
Ugt2b36	231396	chr5:87065927-87092555:-	13.4632	13.457	11.7529	13.5864	13.1096	12.0388	13.3313	12.6346	13.7915	13.7219	13.7193	13.6791
Gcdh	270076	chr8:84886387-84893921:-	13.6542	13.7192	12.8263	13.7849	13.406	13.0964	13.4985	13.2624	13.8474	13.8834	13.8772	13.6686
Canx	12330	chr11:50293957-50325673:-	13.5643	13.5719	13.6845	13.6294	13.6572	13.6767	13.5393	13.7286	13.5894	13.5953	13.5978	13.6656
Ftcd	14317	chr10:76575648-76590338:+	13.5141	13.4317	13.3118	13.6526	13.3466	13.4541	13.3446	13.5337	13.5917	13.5181	13.6714	13.663
Aes	14797	chr10:81559444-81566371:+	13.5345	13.6685	12.8474	13.5369	13.3788	13.1931	13.3919	13.1575	13.5983	13.6696	13.7494	13.6607
Aqp9	64008	chr9:71110659-71163289:-	13.735	13.7881	12.8269	13.823	13.7409	13.019	13.7916	13.3012	13.8012	13.8852	13.7309	13.6541
Rpsa	16785	chr9:120127766-120132369:+	13.6863	13.8483	13.8762	13.5071	13.6761	13.8975	13.7251	13.7705	13.6901	13.6215	13.8409	13.6469
Dgat2	67800	chr7:99153663-99182713:-	13.7393	13.6707	13.4093	13.6686	13.6483	13.8685	13.593	13.9481	13.7558	13.7133	13.7302	13.6439
Dnajc3	100037258	chr14:118937932-118981702:+	13.514	13.5887	14.1364	13.617	13.8282	14.1782	13.6097	14.1858	13.5978	13.6352	13.6287	13.6245
Aldh4a1	212647	chr4:139622894-139649691:+	13.2951	13.2259	11.7963	13.4039	13.0116	12.1896	13.1009	12.545	13.5228	13.5298	13.4598	13.6221
Cxcl12	20315	chr6:117168535-117181368:+	13.7993	13.5548	12.9302	13.791	13.6694	12.8276	13.5034	13.3143	13.7738	13.772	13.7221	13.6203
Abcc2	12780	chr19:43782308-43838218:+	13.3709	13.063	12.9388	13.5639	13.5831	13.2548	13.3843	13.3928	13.5394	13.5521	13.3977	13.6191
Cebpa	12606	chr7:35119293-35121931:+	13.3327	13.2799	13.1829	13.4674	13.5149	12.888	13.3199	13.3049	13.6006	13.6284	13.6765	13.6165
Hsd3b7	101502	chr7:127800609-127803802:+	13.7247	13.6357	12.9908	13.6591	13.7878	13.4295	13.8068	13.4726	13.8802	13.8399	13.8053	13.6159
Amfr	23802	chr8:93971588-94012640:-	13.4702	13.4589	13.4618	13.5373	13.6658	13.5245	13.5076	13.5962	13.4202	13.4746	13.3858	13.6089
Sqstm1	18412	chr11:50200152-50210820:-	13.4532	13.5048	13.6358	13.4945	13.4575	13.3463	13.5417	13.2666	13.5531	13.4781	13.6184	13.6087
Sema4g	26456	chr19:44989344-45003395:+	13.5046	13.3341	12.2572	13.543	13.5326	12.8139	13.2946	13.1776	13.6121	13.5733	13.507	13.6002
Steap4	117167	chr5:7960472-7982213:+	13.9363	14.4577	16.1717	14.3084	14.5964	16.0235	14.5851	15.8525	13.5886	13.7635	13.4261	13.5963
Herpud1	64209	chr8:94386429-94395371:+	13.8274	14.1411	13.5095	13.8017	13.6233	13.849	13.4856	13.7244	13.464	13.659	13.7647	13.5813
Acadvl	11370	chr11:70010183-70015428:-	13.5789	13.7042	13.7053	13.6565	13.6758	13.6065	13.8577	13.6785	13.6985	13.879	13.8707	13.5764
Slc25a39	68066	chr11:102402976-102407517:-	13.5485	13.6949	13.6319	13.5478	13.4962	13.7436	13.5255	13.5608	13.5185	13.6246	13.663	13.5745
Idh1	15926	chr1:65158616-65186479:-	13.378	13.2487	12.9478	13.4456	13.3893	13.0817	13.3569	13.1302	13.5824	13.6076	13.5638	13.5703
Sdha	66945	chr13:74322255-74350240:-	13.2351	13.198	13.0086	13.432	13.1368	13.0714	13.3127	13.1174	13.477	13.6001	13.5364	13.5641
Cpt1a	12894	chr19:3323301-3385733:+	13.4612	13.5178	13.2808	13.9532	13.5729	13.4235	13.6467	13.5015	13.4703	13.686	13.4842	13.5622
Haao	107766	chr17:83831354-83846790:-	13.4255	13.483	12.3796	13.4625	13.1975	12.7107	13.2305	12.9913	13.6284	13.5532	13.6149	13.5577
Cth	107869	chr3:157894248-157925063:-	13.1006	12.91	11.3679	13.1156	12.7444	11.8707	12.6222	12.2127	13.3117	13.0379	12.9587	13.5558
Aldh6a1	104776	chr12:84430721-84451024:-	13.286	13.2609	12.5171	13.4901	13.223	12.918	13.3242	13.1814	13.5111	13.5387	13.4452	13.5539
Marc1	66112	chr1:184786767-184811300:-	13.3671	13.4064	12.759	13.5642	13.2779	13.0966	13.3188	13.2598	13.4524	13.5441	13.535	13.5539
Cyp2a12	13085	chr7:27029090-27036815:+	13.5206	13.5551	13.0685	13.7094	13.2778	13.1674	13.5071	13.2115	13.5402	13.5997	13.7423	13.5535
Got2	14719	chr8:95864137-95888365:-	13.5381	13.5505	13.1887	13.63	13.5702	13.3819	13.5859	13.5162	13.526	13.6129	13.6322	13.5442
Aldh7a1	110695	chr18:56525736-56572939:-	13.1957	13.1375	12.0415	13.397	12.9914	12.5313	13.0616	12.7905	13.4671	13.4538	13.4937	13.5432
Pdia6	71853	chr12:17266595-17284770:+	13.3603	13.6099	14.1488	13.3502	13.8383	14.3085	13.582	14.1982	13.7009	13.6526	13.7233	13.54
Slc25a15	18408	chr8:22375550-22398621:-	13.6375	13.5197	13.925	13.6111	13.3161	13.7567	13.3916	13.572	13.5129	13.4494	13.2629	13.5385
Car3	12350	chr3:14863538-14872373:+	12.7536	12.2933	9.6833	13.2187	10.1857	9.36447	11.7813	9.43331	14.0847	14.1386	14.0985	13.5382
Sdc1	20969	chr12:8771396-8793687:+	13.413	13.2669	13.5545	13.3473	13.2323	13.4208	13.1971	13.1269	13.276	13.2819	13.2842	13.5318
Slc25a23	66972	chr17:57043711-57059863:-	13.494	13.3955	12.5802	13.5099	13.5737	12.8787	13.4886	13.2274	13.5146	13.5915	13.5179	13.5294
Ces3b	13909	chr8:105083755-105093591:+	13.04	12.7482	11.294	13.3236	12.8912	11.6328	12.7968	11.8378	13.4657	13.0109	13.4628	13.5203
Actb	11461	chr5:142903115-142906754:-	13.637	13.8952	14.1026	13.5279	13.6368	14.1618	13.5698	13.8433	13.5971	13.4929	13.9139	13.519
Sds	231691	chr5:120476547-120483905:+	13.6467	13.6412	13.5552	13.267	12.7692	13.3123	13.095	13.1115	13.0565	12.8909	12.7777	13.5187
Ak3	56248	chr19:29020832-29047902:-	13.4657	13.4655	12.9901	13.494	13.3521	13.1687	13.4028	13.2644	13.5282	13.5491	13.5109	13.5182
Hspd1	15510	chr1:55077833-55088243:-	13.4005	13.3731	13.0854	13.6487	13.2716	12.9118	13.3432	13.0375	13.428	13.4699	13.4367	13.5171
Xbp1	22433	chr11:5520641-5525993:+	13.2675	13.4515	13.6919	13.3842	13.6143	13.7096	13.4763	13.5517	13.4496	13.2205	13.4242	13.5165
Ttc36	192653	chr9:44799400-44802951:-	13.3524	13.4519	11.9694	13.3202	13.1475	12.5908	13.1392	12.9145	13.4229	13.339	13.5466	13.5107
Gpt2	108682	chr8:85492617-85527558:+	13.7382	13.7096	14.1357	13.7378	13.3683	13.6972	13.5909	13.3302	13.5211	13.6744	13.5003	13.5089
Lpgat1	226856	chr1:191718024-191784257:+	13.8431	14.0284	14.0837	14.2776	13.9922	13.9157	13.926	14.0717	13.6358	13.8804	13.4593	13.5081
Mup14	100039116	chr4:61300037-61303998:-	14.1866	13.8759	14.0651	14.706	14.3432	14.1034	14.0952	14.0602	14.9481	14.3043	14.6219	13.4942
BC024386	212965	chr7:140906064-140907967:+	13.371	13.2664	12.1685	13.3142	13.4407	12.8619	13.3076	13.3199	13.5475	13.4469	13.5295	13.4868
Otc	18416	chrX:10252305-10321024:+	13.0445	13.0012	11.2799	13.2891	12.619	11.3031	12.734	12.0232	13.4425	13.2875	13.3518	13.4838
Chp1	56398	chr2:119547707-119587022:+	13.3798	13.3133	13.2629	13.5237	13.4629	13.2375	13.5837	13.3329	13.3544	13.4888	13.4721	13.4652
Rpl13a	22121	chr7:45125563-45128745:-	13.4544	13.6474	13.6301	13.2656	13.378	13.5783	13.4728	13.4588	13.4108	13.3832	13.5488	13.4505
Qdpr	110391	chr5:45434032-45450229:-	13.0084	12.9513	12.0024	13.0138	12.7236	12.4015	12.8612	12.5924	13.3093	13.2074	13.3313	13.4488
Adh5	11532	chr3:138437200-138455499:+	13.3613	13.3779	12.6627	13.446	13.2187	12.7177	13.2706	12.9552	13.4977	13.4979	13.5159	13.4484
Atp1a1	11928	chr3:101576219-101604707:-	13.3618	13.3561	13.7967	13.4585	13.3938	13.6378	13.3707	13.6772	13.2492	13.4178	13.2625	13.4463
Cyp27a1	104086	chr1:74713535-74737897:+	13.4313	13.4179	12.4137	13.4429	13.2629	12.6759	13.1155	12.752	13.7302	13.5356	13.6745	13.4442
Lgals9	16859	chr11:78962979-78984924:-	13.4539	13.4607	13.5128	13.4533	13.3911	13.4866	13.3577	13.3804	13.5138	13.4737	13.464	13.4364
Tmem176b	65963	chr6:48833811-48841374:-	13.5898	13.9253	13.8448	13.5464	13.8518	14.1027	13.6575	14.1823	13.5621	13.4772	13.3963	13.4249
Cyp2c70	226105	chr19:40153361-40187286:-	13.6522	13.8224	12.5342	13.7962	13.2402	12.1053	12.747	12.6479	13.7005	12.9855	13.5623	13.4236
Dcaf11	28199	chr14:55560029-55570065:+	13.3301	13.2947	12.6376	13.4366	13.1949	12.9579	13.2303	13.0511	13.377	13.4104	13.4449	13.4224
Upp2	76654	chr2:58567334-58792971:+	12.861	12.4429	9.62653	12.8578	10.7826	9.5369	11.6515	9.71837	13.1313	12.8699	12.9203	13.4216
Iigp1	60440	chr18:60373616-60392629:+	13.355	13.4038	13.5409	13.6565	13.4881	13.221	13.5181	13.3993	13.5128	13.3802	13.3658	13.415
Nnmt	18113	chr9:48591877-48605123:-	13.4024	13.4168	13.5893	13.2905	13.2593	13.6675	13.3103	13.2431	13.0864	12.9463	12.6293	13.411
Gnas	14683	chr2:174284320-174346742:+	13.5494	13.5629	13.573	13.4882	13.4303	13.641	13.6001	13.5556	13.559	13.5565	13.6163	13.4063
Hsd17b13	243168	chr5:103955442-103977388:-	13.2097	13.3915	12.7653	13.2409	13.0164	12.9106	13.0679	13.1409	13.0302	13.1765	13.2324	13.403
Abcd3	19299	chr3:121758904-121815302:-	13.2544	13.1855	13.0842	13.632	13.3502	13.1686	13.5042	13.1324	13.5758	13.6698	13.6553	13.398
Aldh8a1	237320	chr10:21377300-21396578:+	13.2356	13.154	12.5088	13.3475	13.1349	12.8554	13.1196	13.0913	13.3473	13.2718	13.2294	13.3903
Klkb1	16621	chr8:45266688-45294835:-	12.986	12.9629	11.3278	13.2259	12.9347	12.0469	12.9631	12.6658	13.2786	13.3402	13.24	13.3855
Slc25a47	104910	chr12:108851129-108856815:+	13.308	13.8127	13.7616	13.9261	13.3992	13.4206	13.623	13.2881	13.2458	13.6821	13.7216	13.3824
Apoc4	11425	chr7:19678084-19681460:-	13.3702	13.5366	12.6284	13.2864	13.3518	13.0844	13.2886	13.0305	13.4465	13.4123	13.5972	13.3717
Aadac	67758	chr3:60031788-60040157:+	13.0835	13.0618	11.8082	13.2234	12.6336	12.2214	12.9773	12.5737	13.2931	13.2562	13.2453	13.3604
Cpn1	93721	chr19:43956308-43986520:-	13.2594	13.4455	13.3241	13.3004	13.3272	13.41	13.4103	13.4803	13.2659	13.3487	13.3682	13.3574
Acsm1	117147	chr7:119617828-119662515:+	13.394	13.3429	12.4795	13.41	13.3009	12.8568	13.3136	12.9072	13.5493	13.478	13.4686	13.357
Abat	268860	chr16:8513429-8621567:+	13.0776	12.8923	11.6094	13.3495	13.1244	12.4624	13.0345	12.9094	13.2436	13.2487	13.1289	13.3563
D17Wsu92e	224647	chr17:27751232-27820542:-	13.1638	13.2402	13.1956	13.307	13.338	13.2249	13.3194	13.2097	13.21	13.3874	13.2749	13.3545
Akr1a1	58810	chr4:116636510-116651674:-	13.3494	13.3378	13.1347	13.3051	13.1617	13.2573	13.3164	13.0424	13.3971	13.4657	13.4781	13.3523
Ldhd	52815	chr8:111626271-111630322:-	13.174	13.1951	13.6937	13.233	13.5193	14.0875	13.4145	13.9155	13.3151	13.283	13.2019	13.3468
Msrb1	27361	chr17:24736593-24742778:+	13.4279	13.5327	12.7637	13.3831	13.2724	12.8548	13.4972	13.086	13.3914	13.4648	13.4944	13.3306
Vcp	269523	chr4:42979964-43000507:-	13.284	13.2627	13.3121	13.3484	13.2326	13.2742	13.2548	13.1444	13.3564	13.2837	13.3523	13.3278
Etnk2	214253	chr1:133363572-133380319:+	13.5624	13.5072	12.1752	13.3677	13.2212	12.5742	13.2958	12.7196	13.2927	13.3058	13.2286	13.3179
Serp1	28146	chr3:58521971-58525884:-	13.4508	13.5075	14.1806	13.4286	13.5319	14.1749	13.3524	14.0542	13.4056	13.3558	13.5341	13.3167
Gcgr	14527	chr11:120530727-120538984:+	13.3829	13.5489	12.3871	13.4214	13.373	12.7576	13.3626	13.0231	13.4427	13.4936	13.5077	13.3163
Tpi1	21991	chr6:124810592-124814296:-	13.3064	13.3123	13.2761	13.3454	13.0879	13.1764	13.2224	13.1006	13.3581	13.3838	13.4276	13.3121
Slc10a1	20493	chr12:80953185-80968079:-	13.4651	13.2999	11.644	13.4208	13.2564	11.9226	13.2528	12.5365	13.493	13.5043	13.5366	13.3101
Man2a1	17158	chr17:64601649-64755110:+	13.3143	13.213	13.6858	13.447	13.3378	13.6871	13.3517	13.7188	13.1166	13.2227	13.0779	13.3072
Chchd10	103172	chr10:75933130-75937750:+	13.255	13.4451	12.7306	13.3323	13.2765	13.0993	13.4072	12.9244	13.3904	13.5168	13.6632	13.3062
Hacl1	56794	chr14:31607226-31640965:-	13.1638	12.8156	13.4266	13.0629	13.5699	13.1413	13.553	13.0444	13.2209	13.2397	13.2947	13.2994
Creg1	433375	chr1:165763758-165775309:+	13.0177	12.9775	12.4898	13.0332	12.9564	12.6162	13.1194	12.5853	13.2037	13.3286	13.3082	13.2981
Cd164	53599	chr10:41519500-41531042:+	13.4644	13.4237	13.4163	13.3998	13.4223	13.4548	13.4661	13.4382	13.455	13.3862	13.3025	13.2951
Grn	14824	chr11:102430322-102436809:+	13.4445	13.5864	13.6108	13.4279	13.5477	13.8318	13.5613	13.7369	13.0899	13.1709	13.0883	13.2928
Gabarapl1	57436	chr6:129533192-129542331:+	12.7979	12.8466	12.1184	12.9402	12.7852	12.1856	12.9521	12.2918	13.1251	13.1586	13.1453	13.2887
Aass	30956	chr6:23072173-23132986:-	12.9409	12.8119	12.5571	13.1783	12.6589	12.8425	12.7992	12.8047	13.0621	13.0006	12.8337	13.2598
Bsg	12215	chr10:79704358-79711979:+	13.3969	13.5825	13.1838	13.4602	13.3273	13.2656	13.4597	13.3005	13.3681	13.4005	13.4317	13.2569
Gm4788	214403	chr1:139697919-139781239:-	12.9232	12.7598	12.3562	13.1629	13.0059	12.4412	12.8287	13.0711	13.1178	13.0372	12.8384	13.2523
Atf5	107503	chr7:44812256-44816658:-	13.1711	13.3599	13.7456	12.815	13.5654	13.7453	13.4123	13.5038	12.9988	12.9979	13.1092	13.2513
Dap	223453	chr15:31224385-31274338:+	13.3853	13.5526	13.5723	13.3321	13.2144	13.6182	13.2125	13.3897	13.24	13.2216	13.1926	13.2497
Rpl7	19989	chr1:16101296-16104433:-	13.2016	13.3026	13.2232	13.0951	13.1243	13.1265	13.1848	13.1053	13.2132	13.1607	13.3257	13.2475
Sult2a8	76971	chr7:14410686-14446587:-	13.4607	13.4599	10.6317	13.8298	12.5984	10.5229	12.9331	11.1106	14.1435	14.004	13.8408	13.2473
Upb1	103149	chr10:75406911-75441679:+	13.1516	13.1424	12.0826	13.1273	13.0527	12.5097	13.0579	12.8238	13.1858	13.2485	13.2559	13.2447
Iqgap2	544963	chr13:95627177-95891922:-	13.1035	13.0143	13.2173	13.3746	13.1685	13.0859	13.1373	13.1936	13.2183	13.2467	13.0176	13.2446
Glyctk	235582	chr9:106152860-106158138:-	13.3737	13.3875	13.1193	13.4624	13.3655	13.758	13.2688	13.7099	13.2499	13.3457	13.3873	13.239
Ifitm3	66141	chr7:141009590-141010744:-	13.4163	13.6469	13.7869	13.2826	13.297	13.7458	13.2998	13.6027	13.376	13.2778	13.4284	13.2366
Rplp1	56040	chr9:61913283-61914510:-	13.3509	13.5077	13.44	13.1722	13.3092	13.4966	13.3928	13.3828	13.2566	13.2566	13.3814	13.2253
Rack1	14694	chr11:48800360-48806241:+	13.2041	13.2752	13.4645	13.0489	13.1974	13.4757	13.2897	13.3002	13.2201	13.181	13.3508	13.2232
Surf4	20932	chr2:26920041-26933511:-	13.3385	13.4446	13.9412	13.3025	13.5524	14.0453	13.3907	13.8729	13.274	13.225	13.3827	13.2128
Rps4x	20102	chrX:102184941-102189391:-	13.1881	13.2688	13.3621	13.0422	13.1651	13.3438	13.2642	13.2643	13.1532	13.1261	13.2347	13.2128
Atp5g3	228033	chr2:73908447-73911326:-	13.0495	13.1379	12.8499	13.0776	12.8274	12.8759	13.1048	12.7642	13.2196	13.1955	13.2835	13.2108
Ctsd	13033	chr7:142375916-142387870:-	13.1837	13.1929	13.0939	13.2035	13.1278	13.154	13.3003	13.0306	13.2522	13.2589	13.2726	13.2088
Tmem205	235043	chr9:21921009-21927535:-	13.3103	13.4926	12.8519	13.2463	13.2276	13.1887	13.2579	13.2269	13.3772	13.3471	13.5881	13.2072
Mia2	338320	chr12:59095800-59190220:+	13.0801	12.9809	13.0729	13.325	13.0499	13.0336	13.0721	13.0885	13.1528	13.2765	13.1142	13.2054
Cox4i1	12857	chr8:120668225-120674209:+	13.05	13.2129	12.9342	13.0212	12.9243	13.0181	13.1373	12.9544	13.1993	13.2313	13.3201	13.2024
Akr1c14	105387	chr13:4059591-4090422:+	12.7953	12.5201	10.8012	12.9921	12.6431	11.3102	12.7851	12.0157	13.0947	13.1737	13.2109	13.1997
Kmo	98256	chr1:175632193-175660853:+	13.3387	13.358	12.8897	13.5949	13.1835	13.1681	13.3553	13.1392	13.3566	13.4302	13.3319	13.196
Ces2a	102022	chr8:104734003-104741634:+	12.4289	12.2926	12.2726	12.4955	12.1138	11.6794	12.3515	11.9706	13.1261	12.985	13.4583	13.1958
Ssr3	67437	chr3:65379657-65392553:-	13.2682	13.3147	14.2041	13.2265	13.511	14.2273	13.2943	14.0898	13.231	13.2615	13.3089	13.1933
Selenbp2	20342	chr3:94693573-94704406:+	13.5699	12.7062	10.1764	14.2725	12.7727	10.567	12.0834	11.2521	13.6581	12.5371	13.6661	13.1931
Retsat	67442	chr6:72598628-72607488:+	13.4375	13.5285	13.1628	13.4789	13.6022	13.0765	13.9626	13.3546	13.4095	14.0139	13.7633	13.1911
Cyp4v3	102294	chr8:45305802-45333196:-	13.0034	12.9875	12.4636	13.3019	12.8176	12.7348	12.9811	13.0181	13.3112	13.3717	13.2872	13.19
Ugt3a2	223337	chr15:9335598-9370870:+	13.1262	13.0535	12.427	13.3425	13.0437	12.9207	13.0916	13.3273	13.325	13.3424	13.2795	13.1773
Acadm	11364	chr3:153922353-153944643:-	13.1427	13.2268	12.9411	13.2959	13.3554	13.0464	13.5702	13.3942	13.0851	13.4282	13.2484	13.1713
Marc2	67247	chr1:184813068-184845847:-	13.1021	13.1288	12.3335	13.156	12.888	12.5642	12.9705	12.7288	13.1678	13.1492	13.213	13.1657
Mbl2	17195	chr19:30232957-30239682:+	12.6862	12.8381	11.1219	12.7217	12.2033	11.0524	12.0935	11.4347	13.0554	12.9866	12.9669	13.165
Slc25a5	11740	chrX:36795597-36798808:+	13.1166	12.9887	12.9426	13.1698	12.942	12.9867	12.974	12.8508	13.2241	13.198	13.2653	13.1639
Cyp2c23	226143	chr19:44005022-44029247:-	12.5432	12.6667	10.6205	12.8114	11.8164	10.3471	12.1651	11.0313	12.8886	12.9583	12.9417	13.1637
Pdia4	12304	chr6:47796141-47813512:-	13.1864	13.3677	13.8586	13.1797	13.7488	14.2232	13.2358	14.1442	13.3105	13.2036	13.3159	13.1616
Eif5a	276770	chr11:69916712-69921958:-	13.0593	13.1498	13.1292	13.0649	12.9794	13.1837	13.0315	13.0473	13.1028	13.1078	13.2544	13.1594
Hsd17b4	15488	chr18:50128201-50196270:+	13.1755	13.2214	12.8911	13.4993	13.3508	12.9818	13.4478	13.1961	13.254	13.4602	13.3417	13.1562
Slc17a2	218103	chr13:23807027-23823525:+	12.855	12.942	13.0214	12.9968	12.7375	12.6927	12.8609	12.5233	13.0732	13.0641	13.1076	13.155
Lap3	66988	chr5:45493374-45512691:+	12.9141	12.8498	12.356	13.1094	12.6404	12.5042	12.6957	12.5926	13.1088	13.0654	13.0529	13.1516
Creb3l3	208677	chr10:81084333-81098872:-	13.2868	13.4563	13.5599	13.552	13.385	13.7782	13.4964	13.6221	13.2134	13.3845	13.4656	13.1486
Rpl7a	27176	chr2:26910807-26913311:+	13.0432	13.152	13.0443	12.9667	12.9044	12.9958	13.0346	12.9705	13.1265	13.0963	13.251	13.1482
Os9	216440	chr10:127094259-127121160:-	13.1178	13.2104	13.0556	13.1736	13.2473	13.4156	13.1108	13.46	13.1924	13.0751	13.1746	13.1448
Got1	14718	chr19:43499753-43524605:-	12.7694	12.2606	13.3128	12.4253	12.016	12.9488	12.4358	12.5023	12.6821	12.2298	12.1048	13.1322
Ddx17	67040	chr15:79527696-79546741:-	13.0618	12.8984	13.0523	13.0181	13.091	13.0363	12.9942	13.1783	13.1195	12.9121	13.0037	13.1276
Dmgdh	74129	chr13:93674436-93752823:+	12.856	12.7589	12.3783	13.0853	12.9632	12.5764	12.8881	12.6557	13.2144	13.2334	13.2946	13.1208
Ghitm	66092	chr14:37120445-37135322:-	12.8379	12.8909	12.8139	12.9872	12.7353	12.7733	12.9378	12.7215	12.9983	13.1085	13.0348	13.1178
Fdps	110196	chr3:89093588-89101967:-	12.7589	12.3342	13.2802	12.5641	13.3616	13.8619	13.1183	13.3835	13.3009	13.2477	13.4065	13.1156
Hmgcs1	208715	chr13:119690351-119708260:+	12.9729	12.4438	13.4769	12.9075	13.9838	14.2493	13.5961	13.8023	13.1926	13.3692	13.3765	13.1126
Acad11	102632	chr9:104063703-104127646:+	13.0543	13.077	12.9832	13.4069	13.245	13.1083	13.3464	13.2918	13.1411	13.3483	13.281	13.1078
Slc9a3r1	26941	chr11:115163341-115181178:+	13.1017	13.2249	12.9016	13.301	12.7601	12.485	12.9242	12.5916	13.0773	13.1692	13.2448	13.0882
Hsd11b1	15483	chr1:193221641-193264045:-	12.9915	13.0383	11.6262	13.0782	12.2926	11.4996	12.6773	11.9983	13.2574	13.1639	13.341	13.0879
Wbp1l	226178	chr19:46599106-46657389:+	13.1825	13.253	13.1057	13.0928	13.2064	13.0103	13.3714	12.966	12.9799	13.1049	13.1107	13.0839
Eif5	217869	chr12:111538101-111546753:+	13.0794	13.043	13.3893	13.1599	13.0148	13.0666	13.0448	12.9936	13.0887	13.1243	13.0766	13.0819
Acat1	110446	chr9:53580522-53610350:-	12.9814	13.0694	13.5876	13.1467	13.2405	13.7204	13.3808	13.6416	13.0901	13.4575	13.2846	13.081
Slc25a25	227731	chr2:32414487-32451470:-	12.6073	13.0437	13.0452	12.5398	11.818	12.2342	11.9645	11.8979	12.7764	12.8596	11.7917	13.0766
Ppara	19013	chr15:85735564-85806851:+	12.9076	12.803	12.436	13.367	12.7839	12.3286	12.8969	12.5818	13.1059	13.4514	13.2635	13.0763
Agxt	11611	chr1:93135240-93145421:+	12.6082	12.696	10.9958	12.5928	12.404	11.6332	12.3802	11.9648	12.8079	12.6251	12.7827	13.0762
Plin2	11520	chr4:86656565-86670059:-	12.7391	13.0368	14.4306	13.319	13.0762	14.4107	13.6709	13.7851	13.1319	13.5424	13.5217	13.0732
Lpin2	64898	chr17:71183978-71249818:+	12.747	12.5511	11.999	12.7859	12.4841	12.5063	12.7705	12.3784	12.5686	12.6717	12.8782	13.0665
Slc31a1	20529	chr4:62360701-62391769:+	13.0976	13.164	12.6188	13.1563	13.0977	12.7525	13.0467	12.9801	13.0571	13.1111	13.0366	13.0659
Nedd4	17999	chr9:72662347-72749848:+	12.8452	12.7827	13.906	13.0032	12.9864	13.7762	13.0347	13.4747	12.9763	12.9979	12.9305	13.0605
Abca1	11303	chr4:53030789-53159895:-	12.7398	12.731	14.1773	12.8605	13.0998	13.8955	12.8559	13.7415	12.9009	12.862	12.7354	13.0589
Gpd1	14555	chr15:99717593-99725007:+	13.1883	13.1745	12.6176	13.263	13.3592	12.825	13.4389	13.1548	13.2117	13.5018	13.4172	13.0586
Cluh	74148	chr11:74649495-74670847:+	12.9025	12.8336	12.5325	13.0666	13.094	12.843	13.0071	13.0124	12.9587	13.0185	12.9877	13.0539
Ces1f	234564	chr8:93256236-93279736:-	12.2939	12.1385	9.25974	12.4712	10.9599	9.05191	12.3238	9.38466	13.0127	13.2339	13.1813	13.053
Plxnb2	140570	chr15:89155546-89180788:-	13.0194	13.0121	12.7557	13.1683	13.1853	12.9809	13.0626	13.0884	13.0763	13.1278	13.0548	13.051
Mlxipl	58805	chr5:135106891-135138382:+	12.8048	12.8305	11.9447	12.9121	12.5566	11.7137	12.5266	12.0325	13.2185	12.9721	13.0338	13.0464
Cyb5r3	109754	chr15:83153501-83172208:-	12.8613	12.8146	12.1085	12.871	12.6364	12.168	12.6092	12.2942	13.102	13.0195	13.1549	13.0414
Hnrnpa2b1	53379	chr6:51460435-51469894:-	12.9951	12.9683	12.9949	13.0668	12.9231	13.025	12.9341	13.0297	13.0388	13.018	12.936	13.0404
Edem1	192193	chr6:108828641-108859356:+	12.9937	13.036	13.5162	13.0754	13.1211	13.6122	12.9214	13.5208	13.0489	12.9774	12.9451	13.0381
Cald1	109624	chr6:34598504-34775469:+	12.8689	12.8163	13.3145	13.0454	13.0831	13.1975	12.8822	13.1513	12.9005	12.9395	12.8152	13.0319
Aplp2	11804	chr9:31149557-31211815:-	12.9865	12.8918	12.2871	13.1055	12.8754	12.4741	12.9288	12.6656	13.0282	13.1288	12.9887	13.0268
Hspb8	80888	chr5:116408491-116422864:-	13.088	13.1231	12.5291	13.0885	12.8933	12.4707	13.1037	12.4749	13.0106	13.0062	12.8094	13.0226
Srrm2	75956	chr17:23803187-23824743:+	12.9299	12.7309	12.861	12.8913	12.9438	12.8967	12.8129	12.9884	12.9638	12.8992	12.813	13.0225
Acsl5	433256	chr19:55253369-55296628:+	12.5326	12.4409	12.2563	12.7112	12.659	12.3582	12.7594	12.5688	12.9798	12.8821	12.9585	13.0187
Fasn	14104	chr11:120805958-120824547:-	12.6939	12.3923	12.1027	12.4039	12.7223	12.5603	12.134	12.5865	12.8012	12.8326	12.9448	13.0178
Ppia	268373	chr11:6415870-6419810:+	12.8695	12.9508	12.82	12.8525	12.7595	12.7638	12.8415	12.7043	12.9927	13.0229	13.1106	13.0168
Gfra1	14585	chr19:58235581-58455398:-	13.074	13.0719	13.1792	13.1962	13.1947	13.3237	12.9799	13.2968	12.8058	12.8488	12.6681	13.016
Hadha	97212	chr5:30118304-30154980:-	12.8588	12.8677	13.2675	13.0924	13.1097	13.2191	13.3218	13.2984	12.9369	13.203	13.102	13.0124
Pemt	18618	chr11:59970614-60046489:-	12.8839	12.9951	12.5852	12.8096	12.7745	12.7884	12.7453	12.7314	13.0295	12.9477	13.1017	13.0105
Rps3a1	20091	chr3:86137940-86142668:-	12.9427	13.0533	13.0335	12.8412	12.8858	12.9534	12.9757	12.8996	12.9592	12.9185	13.0493	13.0029
Fh1	14194	chr1:175601378-175625635:-	12.7136	12.608	12.7411	12.9537	12.3095	12.5459	12.5596	12.2893	12.7941	12.7251	12.4653	13.0002
Lars2	102436	chr9:123366927-123462675:+	13.4271	13.2539	12.9463	13.0963	13.1275	13.1154	13.2412	13.2036	13.3627	13.0909	13.3241	12.9927
Etfa	110842	chr9:55454436-55512243:-	12.7486	12.8111	12.2981	12.876	12.6385	12.385	12.8321	12.546	12.9524	13.0281	13.0127	12.9892
Fkbp8	14232	chr8:70527743-70535328:+	12.924	13.0715	12.9057	12.9378	12.9621	12.9143	12.888	12.8502	12.9986	13.146	13.1481	12.9884
Lbp	16803	chr2:158306493-158332852:+	13.429	13.7971	13.8946	13.2678	13.7148	14.1061	13.5187	14.2024	13.0868	13.059	12.8242	12.9854
Rpl8	26961	chr15:76904071-76906318:+	12.956	13.0505	13.0826	12.8548	12.9036	13.0667	12.9926	12.9786	12.9464	12.9593	13.1047	12.9854
Slc25a3	18674	chr10:91116578-91123963:-	12.795	12.8577	12.8738	12.8771	12.6696	12.8322	12.8584	12.7183	12.8721	12.9238	12.9312	12.9831
Srebf1	20787	chr11:60199084-60220627:-	12.8427	12.498	11.3124	12.8036	12.2093	11.2175	11.8082	11.628	13.1133	13.0907	13.1555	12.9785
Scarb2	12492	chr5:92441311-92505657:-	12.8685	12.9025	12.8391	13.068	12.8448	12.8169	13.0052	12.9075	12.83	13.027	12.8594	12.9784
Rpl3	27367	chr15:80077781-80083406:-	12.8393	12.9281	13.2191	12.6956	12.991	13.2857	12.9581	13.0992	12.8672	12.8965	13.0591	12.9756
Ech1	51798	chr7:28825338-28832239:+	13.2841	13.4251	13.1537	13.2866	13.3803	13.3085	13.6912	13.4583	13.1729	13.5584	13.4385	12.9754
Glo1	109801	chr17:30592862-30612659:-	12.93	13.0444	12.3286	12.9274	12.8028	12.4249	12.9643	12.7486	13.0132	13.1643	13.1482	12.9751
Cyp2c50	107141	chr19:40089679-40113955:+	13.2536	13.0085	10.5084	13.462	12.4005	10.2252	12.6411	10.4263	13.7704	13.5245	13.707	12.9731
Hadh	15107	chr3:131233420-131272101:-	12.9479	12.968	12.173	13.0916	12.8449	12.2928	13.1013	12.661	13.0506	13.2537	13.1861	12.9643
Gulo	268756	chr14:65986787-66009210:-	13.0266	12.9091	11.4667	13.0688	12.7806	12.0228	12.8795	12.2269	13.2062	13.0417	12.9892	12.952
Cers2	76893	chr3:95315190-95323599:+	12.9839	12.9093	12.7288	12.9866	12.8148	12.8107	12.7972	12.7827	13.0877	12.9973	13.1297	12.9516
Stat3	20848	chr11:100886806-100939540:-	12.7879	12.7514	13.3297	12.9948	13.0231	13.0871	12.9581	13.0747	12.8051	12.8312	12.6062	12.9497
Selenbp1	20341	chr3:94933083-94944758:+	12.7005	12.4987	11.8149	12.6939	12.3355	11.918	12.3592	12.0293	12.9082	12.7451	12.8049	12.9493
Srpr	67398	chr9:35211203-35217003:+	12.9788	13.0514	13.5577	13.044	13.1027	13.52	12.9995	13.3525	12.9068	13.0223	13.0315	12.9482
C6	12274	chr15:4727210-4804045:+	12.9569	12.8243	12.333	13.0946	13.0177	12.648	12.8493	13.0013	13.0322	12.9691	12.7257	12.9479
Rsrp1	27981	chr4:134923625-134927370:+	12.8479	12.7499	12.2417	12.9181	12.6731	12.2165	12.703	12.4898	12.9982	12.8921	12.7948	12.9422
Oaf	102644	chr9:43221278-43239816:-	12.9757	13.0563	12.5788	13.1715	12.8075	12.4768	12.8108	12.5919	13.1322	13.0928	13.1321	12.9396
Pabpc1	18458	chr15:36595658-36608973:-	12.8158	12.7616	13.0888	12.8737	12.8233	13.0128	12.7763	12.9783	12.8593	12.7795	12.847	12.9358
Rps3	27050	chr7:99477896-99483709:-	12.8821	12.9306	13.0438	12.7513	12.8403	13.0019	12.9304	12.9086	12.851	12.8607	12.9445	12.9343
Lman2	66890	chr13:55343833-55362783:-	13.0101	13.1015	12.9455	13.0986	13.1105	13.1756	12.9909	13.2284	12.9958	13.0574	13.0887	12.9297
Lman1	70361	chr18:65980739-66002635:-	13.0396	12.9848	13.1578	13.0722	13.1855	13.375	12.9756	13.4267	12.9802	12.934	13.0239	12.9296
Nme2	18103	chr11:93949814-93956256:-	13.1385	13.2621	13.3506	13.0022	13.1692	13.4753	13.2335	13.4161	13.0735	13.0066	13.2026	12.9289
Lifr	16880	chr15:7129572-7197489:+	12.8124	12.4588	11.3262	12.7965	12.1325	11.5132	11.9707	11.6841	13.2103	12.878	12.9268	12.926
Atp11c	320940	chrX:60223290-60403981:-	12.8986	12.7647	12.4005	13.0307	13.016	12.4622	12.957	12.8436	13.0691	13.0373	12.7679	12.9249
Aspg	104816	chr12:112106683-112127573:+	12.7739	12.9427	12.5892	12.8024	12.82	12.4272	12.766	12.5997	12.9402	12.9182	12.8492	12.923
Furin	18550	chr7:80389194-80405436:-	12.9935	12.9712	12.8155	13.0551	13.0677	13.1102	12.9572	13.1202	12.9003	12.9422	12.9105	12.9223
Eif1	20918	chr11:100319949-100322099:+	12.9353	13.0603	12.8866	12.9366	12.7194	12.7469	13.0478	12.6439	12.9068	12.9762	13.1245	12.9204
Suclg2	20917	chr6:95473009-95718846:-	12.7487	12.876	12.3342	12.8529	12.6044	12.467	12.719	12.5346	12.8926	13.1096	12.9626	12.9192
Atp2a2	11938	chr5:122453513-122502225:-	12.9878	12.9788	13.737	12.996	13.2127	13.7266	13.1269	13.5468	12.8584	12.7382	12.8344	12.9183
Gpam	14732	chr19:55067636-55127238:-	12.3728	12.1178	12.5927	12.5237	12.4846	12.6326	12.472	12.5379	12.7149	12.8183	12.7806	12.9151
Eif4b	75705	chr15:102073773-102097173:+	12.6343	12.5602	12.3008	12.7895	12.4992	12.2493	12.7279	12.2926	12.7332	12.8306	12.757	12.9121
Mtss1	211401	chr15:58941234-59082026:-	12.8167	12.8347	12.7085	12.8147	12.7149	12.6875	12.6811	12.77	12.7401	12.7273	12.6727	12.9119
Gpld1	14756	chr13:24943152-24991936:+	12.7667	12.6439	11.9384	12.9537	12.7622	12.3776	12.5278	12.5725	12.9455	12.8047	12.8362	12.9093
Gdi2	14569	chr13:3538075-3566261:+	12.7829	12.788	12.8156	12.8507	12.6914	12.7729	12.7431	12.7525	12.8866	12.8921	12.8735	12.904
Ugt2b1	71773	chr5:86916639-86926503:-	12.4212	12.0487	10.386	12.7422	11.4999	10.3579	11.8383	10.8423	13.1468	12.7487	12.8232	12.9013
Mia3	338366	chr1:183326236-183369565:-	12.7385	12.6442	12.7915	12.9422	12.9233	12.8191	12.8627	12.9619	12.8617	12.8659	12.8218	12.9003
Mcfd2	193813	chr17:87254443-87265947:-	13.0769	13.1404	13.3758	12.9345	13.265	13.5328	13.0715	13.4241	12.9826	12.9235	12.9755	12.8995
Rps8	20116	chr4:117153836-117156132:-	12.913	13.0076	13.0522	12.7271	12.8142	12.995	12.8984	12.8985	12.928	12.836	13.0088	12.8934
Rps9	76846	chr7:3704041-3706897:+	12.8873	13.0092	13.088	12.7638	12.851	13.0989	12.9388	12.943	12.8615	12.8632	12.9876	12.8896
Gpt	76282	chr15:76696726-76699675:+	13.0875	12.9152	10.6489	13.1261	12.6265	11.5131	12.6889	12.1071	12.9325	12.7417	12.9378	12.8806
Mttp	17777	chr3:138089855-138143418:-	12.946	12.8989	12.9233	13.1691	13.2217	13.0702	13.1592	13.3097	12.9312	13.0691	13.002	12.8742
Cd1d1	12479	chr3:86995836-86999340:-	12.9696	12.8903	12.2935	13.0081	12.9711	12.7352	13.0652	12.8058	13.1322	13.1815	13.0771	12.8671
Gpat4	102247	chr8:23172946-23208453:-	12.4313	12.2961	11.9655	12.4207	12.0833	11.8691	12.183	12.0003	12.5733	12.5465	12.5682	12.8612
Tspan31	67125	chr10:127067290-127070261:-	12.9576	13.115	12.8486	13.0205	12.9797	13.1176	13.0207	13.094	12.9758	13.0157	13.0408	12.8609
Ctsh	13036	chr9:90054267-90076095:+	12.8918	12.9588	12.4828	12.8832	12.8475	12.6067	12.8664	12.7861	12.8943	12.9661	12.8995	12.8607
Atp5f1	11950	chr3:105942678-105960248:-	12.679	12.7379	12.4114	12.7559	12.483	12.4187	12.7012	12.4408	12.8331	12.8464	12.9192	12.8578
Ephx1	13849	chr1:180989556-181017569:-	12.5996	12.6035	11.388	12.7492	12.4	11.2264	12.658	11.4049	12.9625	13.1356	13.1608	12.8575
Hibadh	58875	chr6:52546230-52640300:-	12.6127	12.6733	11.5471	12.6602	12.2561	11.8859	12.4527	12.0248	12.8538	12.8263	12.8708	12.8471
Ube2d3	66105	chr3:135438232-135468214:+	12.7934	12.7693	12.8497	12.8536	12.6444	12.6019	12.7282	12.6279	12.8352	12.7991	12.7609	12.8463
F9	14071	chrX:59999464-60030760:+	12.7427	12.763	12.4029	12.9054	12.7662	12.643	12.7444	12.9097	12.8289	12.8114	12.6655	12.8454
Sppl2a	66552	chr2:126890395-126933235:-	12.6723	12.6629	13.0163	12.7879	12.7979	13.0786	12.6276	13.1129	12.6916	12.6615	12.5524	12.8444
Rdx	19684	chr9:52047150-52088738:+	12.6023	12.4298	12.1374	12.7822	12.5294	12.1494	12.5417	12.3445	12.8295	12.8286	12.6109	12.8442
C1ra	50909	chr6:124512621-124523440:+	12.9777	13.0538	12.8599	12.9611	12.9689	13.0332	12.8495	13.1121	12.9862	12.9103	12.8997	12.8442
Ndst1	15531	chr18:60684494-60748665:-	12.5738	12.5442	12.9073	12.8242	12.7718	12.8536	12.6548	12.9007	12.7615	12.8802	12.673	12.8421
Sec14l4	103655	chr11:4031782-4048009:+	12.7682	12.6819	12.5857	12.9492	13.0383	13.0131	12.7283	13.0664	12.7327	12.8261	12.6924	12.8405
Sult1a1	20887	chr7:126672870-126676357:-	12.7271	12.4921	10.6546	12.5208	11.8427	10.9264	12.0236	11.1118	12.2591	12.0241	12.5065	12.8392
Ctnnb1	12387	chr9:120933400-120960507:+	12.7636	12.6717	12.9227	12.8846	12.814	12.8794	12.7336	12.8235	12.7999	12.7665	12.6551	12.8391
Hao1	15112	chr2:134497361-134554352:-	12.969	12.8456	12.6846	12.9933	12.9326	12.99	12.983	13.1309	12.9418	12.9954	12.8803	12.8377
Eif4a1	13681	chr11:69666936-69672423:-	12.8242	12.9067	13.161	12.768	12.7026	12.9695	12.7321	12.8174	12.8398	12.7738	12.9147	12.837
Serinc3	26943	chr2:163623273-163645143:-	12.9569	12.9255	13.4871	12.933	13.1155	13.6045	13.1143	13.5489	12.6275	12.7233	12.6994	12.8278
Tmem176a	66058	chr6:48841483-48845364:+	13.1346	13.4252	13.2015	13.0868	13.3729	13.5921	13.1253	13.6962	13.0465	12.9477	12.8716	12.8276
Osgin1	71839	chr8:119437162-119446256:+	11.9831	11.9224	11.9276	12.3354	12.7012	11.905	11.8829	11.7833	12.882	12.2936	13.2258	12.8243
Rps18	20084	chr17:33951999-33955641:-	12.903	13.0103	12.9118	12.7344	12.8251	12.9474	12.8675	12.7879	12.891	12.8202	12.9794	12.8221
Mettl7a1	70152	chr15:100304817-100314348:+	12.5629	12.4065	11.1627	12.8494	12.3716	11.6235	12.4837	11.9714	12.8387	12.6983	12.9103	12.8188
Fads2	56473	chr19:10064164-10101503:-	12.3216	11.9012	11.1591	12.4959	12.0834	11.7775	12.1369	11.7686	12.7361	12.7609	12.8084	12.8105
Cyp2a5	13087	chr7:26835339-26843264:+	12.0987	11.9511	9.58633	12.6272	10.2968	9.21277	11.4004	9.3731	13.1437	12.8733	13.2714	12.8096
Kif1c	16562	chr11:70700548-70731970:+	12.6617	12.6642	12.6727	12.7695	12.9334	12.8265	12.9043	12.8756	12.7231	12.8418	12.7316	12.8083
Aars	234734	chr8:111033842-111055569:+	12.9535	12.9237	12.9964	12.9607	12.8867	12.8024	12.8187	12.7074	12.9739	12.8704	12.9137	12.8071
C8g	69379	chr2:25498650-25501719:-	12.8809	12.985	12.2903	12.8837	12.7306	12.5949	12.8667	12.6353	13.1225	13.0826	13.2379	12.8064
Sec61a1	53421	chr6:88503607-88518800:-	12.8946	13.0552	13.6152	12.7965	13.12	13.7377	12.8022	13.5415	12.767	12.7636	12.9208	12.8062
Gclc	14629	chr9:77754535-77794489:+	12.1698	12.0914	12.4368	12.4475	12.2783	12.042	12.2825	12.1118	12.6441	12.6855	12.6705	12.8047
Bckdha	12039	chr7:25629852-25658761:-	12.7344	12.8704	12.3085	12.7663	12.6753	12.5428	12.7687	12.5644	12.7921	12.9074	12.9213	12.802
Cnbp	12785	chr6:87842615-87851106:-	12.7763	12.7302	12.3582	12.6822	12.6473	12.41	12.815	12.5203	12.828	12.8035	12.9206	12.7995
Lonp2	66887	chr8:86624043-86716638:+	12.9512	12.9715	12.9828	13.1964	13.082	13.1002	13.1669	13.162	13.0612	13.212	13.1334	12.7944
Myh9	17886	chr15:77760585-77842175:-	12.6488	12.6456	12.8132	12.9144	12.7151	12.6077	12.4807	12.6357	12.6163	12.5762	12.5237	12.7928
Ces1d	104158	chr8:93166072-93197804:-	12.7103	12.3976	9.50121	12.6471	11.3116	9.21039	12.3812	9.41505	13.2699	13.5936	13.5974	12.7923
Man1a	17155	chr10:53906033-54075796:-	12.5955	12.5442	12.5683	12.8155	12.5408	12.5958	12.5469	12.705	12.5928	12.6875	12.4912	12.7909
Slc22a1	20517	chr17:12648875-12675838:-	12.8769	13.0126	11.9739	12.9677	12.541	12.1419	12.8756	12.1365	13.1412	13.3014	13.2016	12.7901
Hnrnpu	51810	chr1:178321108-178337815:-	12.6928	12.6273	12.8676	12.7253	12.812	12.8427	12.7172	12.8513	12.8955	12.6513	12.8213	12.7871
Tmem30a	69981	chr9:79768941-79793430:-	12.5054	12.4289	12.8165	12.6924	12.5763	12.6373	12.5752	12.6442	12.7113	12.6682	12.6689	12.7865
Nbr1	17966	chr11:101552107-101581951:+	12.7565	12.7002	12.8082	12.9202	12.8202	12.9605	12.752	12.9819	12.8256	12.7554	12.7204	12.7864
Krt18	16668	chr15:102028216-102032026:+	12.7579	12.9969	13.5021	12.8921	12.7404	13.0287	12.6282	12.7758	12.7412	12.6461	12.8423	12.7758
Hagh	14651	chr17:24850490-24864450:+	12.7148	12.6187	11.6453	12.7149	12.4984	11.844	12.5884	12.1809	12.7331	12.755	12.8794	12.7754
Acaa1b	235674	chr9:119148043-119157093:-	12.4396	12.8648	10.926	13.0785	12.51	10.7327	13.25	11.6068	13.3117	13.739	13.7706	12.7724
Pgm2	72157	chr4:99929451-99987294:+	12.6062	12.6583	12.3844	12.7843	12.6238	12.3635	12.7412	12.5497	12.6873	12.8484	12.7732	12.7721
Uba52	22186	chr8:70508263-70510417:-	12.7636	12.911	12.6549	12.5952	12.6457	12.7781	12.6842	12.6837	12.7312	12.7699	12.9315	12.7713
Etfb	110826	chr7:43444072-43457800:+	12.7627	12.9523	12.5542	12.8039	12.697	12.7156	12.9078	12.744	12.8205	12.9238	13.0361	12.7689
Abhd14b	76491	chr9:106448640-106452918:+	12.4669	12.4386	11.273	12.474	12.172	11.6289	12.3927	11.9435	12.5892	12.6489	12.7044	12.7672
Tmem59	56374	chr4:107178630-107200996:+	12.6872	12.7138	12.3721	12.7179	12.5766	12.4668	12.6283	12.5555	12.7415	12.7694	12.7345	12.7656
Ganab	14376	chr19:8898057-8916742:+	12.8079	12.8118	12.9699	12.8814	12.8857	13.0331	12.7442	13.093	12.7925	12.7615	12.7473	12.7647
Chchd2	14004	chr5:129881161-129887470:-	12.7441	12.8733	12.5789	12.7377	12.607	12.6567	12.867	12.5906	12.7749	12.9114	12.9753	12.7643
Apom	55938	chr17:35128997-35131752:-	12.5896	12.6015	12.4194	12.5785	12.7413	12.607	12.5353	12.807	12.7395	12.672	12.619	12.7635
Inmt	21743	chr6:55170627-55174990:-	12.1568	12.0043	8.90679	12.2247	9.50061	8.56208	10.5326	8.66833	12.9558	12.9037	13.3095	12.7623
Cyp51	13121	chr5:4080674-4104697:-	12.6932	12.3479	13.0853	12.6989	13.1709	13.4445	13.1095	13.1908	12.8462	13.0082	13.0449	12.7603
Ifitm2	80876	chr7:140954839-140955961:-	12.9747	13.23	13.766	12.7368	13.1679	13.9872	13.1298	13.7574	12.6676	12.7123	12.7382	12.7576
Glyat	107146	chr19:12633308-12651737:+	12.6591	12.7427	12.3926	12.852	12.5643	12.4101	12.6566	12.4132	12.7983	12.8422	12.9385	12.7566
Ttc39c	72747	chr18:12643533-12737052:+	12.6729	12.2813	10.9288	12.8804	12.4392	11.1695	12.3105	11.4257	12.767	12.7243	12.7025	12.7467
Krt8	16691	chr15:101996711-102004342:-	12.6575	12.9313	13.0466	12.8745	12.5305	12.7336	12.5083	12.5276	12.7407	12.8812	12.8701	12.7432
Rpl6	19988	chr5:121204501-121209241:+	12.7261	12.8572	12.848	12.615	12.6411	12.8694	12.7313	12.6783	12.7499	12.7028	12.8747	12.7395
Echs1	93747	chr7:140105723-140116423:-	12.6792	12.6739	12.1296	12.7119	12.5812	12.4693	12.7191	12.4928	12.7713	12.8498	12.8198	12.7388
Deptor	97998	chr15:55112317-55259273:+	12.2644	12.1965	12.0354	12.5713	12.4808	11.919	12.3344	12.1308	12.6476	12.6617	12.5517	12.7386
Paics	67054	chr5:76951302-76967509:+	12.3914	12.4033	12.5709	12.5893	12.1701	11.9252	12.3105	12.1458	12.6185	12.6464	12.5799	12.7326
Apoa4	11808	chr9:46240844-46243458:+	12.6901	13.2567	13.0758	12.6287	13.0646	13.3042	12.8628	12.78	12.8767	13.4809	12.9277	12.729
Pink1	68943	chr4:138313410-138326296:-	12.5098	12.5808	12.3534	12.5114	12.6719	12.5452	12.6844	12.5159	12.6653	12.6793	12.7633	12.7251
Ptprf	19268	chr4:118208213-118291397:-	12.4443	12.4138	12.2862	12.6899	12.6403	12.3911	12.5026	12.5823	12.6263	12.8009	12.5316	12.7196
Cltc	67300	chr11:86694354-86757567:-	12.6299	12.5197	13.0714	12.7393	12.8144	13.0317	12.6187	12.9304	12.5844	12.6099	12.559	12.7195
Acbd5	74159	chr2:23068201-23114512:+	12.415	12.2724	12.2028	12.669	12.4803	12.3283	12.521	12.5351	12.7142	12.7244	12.581	12.7172
Ndfip1	65113	chr18:38418907-38465197:+	12.5677	12.5519	12.0657	12.6492	12.3333	12.097	12.4607	12.242	12.6775	12.6471	12.6438	12.7147
Aco1	11428	chr4:40143265-40199009:+	12.5712	12.4398	11.8959	12.7664	12.4575	12.0762	12.4659	12.2337	12.7029	12.7587	12.8021	12.7129
Gabarap	56486	chr11:69991370-69994949:+	12.642	12.8654	12.8919	12.541	12.5877	12.878	12.7239	12.8163	12.6649	12.6857	12.8233	12.7097
Slc25a1	13358	chr16:17925211-17928219:-	12.4834	12.4753	12.3439	12.4748	12.4078	12.5092	12.528	12.4161	12.7103	12.8106	12.8906	12.7073
Kyat1	70266	chr2:30185124-30205847:-	12.73	12.5909	11.2507	12.6521	12.6471	11.9087	12.4523	12.141	12.6102	12.375	12.5731	12.7064
Nlrp6	101613	chr7:140920902-140929192:+	12.9824	12.9387	12.3792	12.9545	12.8592	12.8159	12.7951	12.9777	12.8252	12.7488	12.7897	12.7061
Khk	16548	chr5:30921559-30931248:+	12.6666	12.8601	12.5892	12.7699	12.4069	12.5225	12.6381	12.2306	12.8611	12.9762	13.0752	12.6998
Arf1	11840	chr11:59211412-59228267:-	12.8047	12.8312	13.0275	12.8133	12.8381	13.146	12.7522	13.0042	12.6754	12.7205	12.8048	12.6994
Hyou1	12282	chr9:44379490-44392369:+	12.9947	13.1977	13.8243	12.9126	13.4306	14.0589	12.7995	13.8979	12.8887	12.6724	13.0014	12.6972
Mug-ps1	17835	chr6:122176053-122248566:+	12.5847	12.367	12.5267	12.4504	12.448	12.4887	12.1705	12.6388	12.6535	12.4359	12.492	12.6932
Txndc5	105245	chr13:38500271-38528824:-	12.8114	12.8745	12.9095	12.7421	12.9047	13.1536	12.6255	13.0866	12.7957	12.7898	12.9581	12.6928
Ebp	13595	chrX:8185329-8193512:-	12.5076	12.5312	12.0069	12.5432	12.3738	12.369	12.4055	12.3579	12.6781	12.5791	12.6978	12.6918
Mtus1	102103	chr8:40990912-41133726:-	12.5647	12.537	12.3715	12.7607	12.7875	12.4755	12.7093	12.6416	12.7465	12.6944	12.6014	12.6884
Rpl9	20005	chr5:65388364-65391431:-	12.6316	12.7434	12.7821	12.5154	12.5646	12.7378	12.7028	12.6838	12.6402	12.6377	12.7315	12.6875
Mst1	15235	chr9:108080436-108085027:+	12.664	12.6225	12.5502	12.5771	12.8448	12.9671	12.6065	12.9685	12.7063	12.5442	12.6833	12.6853
Rps5	20103	chr7:12922311-12926686:+	12.6741	12.7962	12.8562	12.4772	12.6425	12.8543	12.7157	12.709	12.6386	12.654	12.8246	12.6843
Trp53inp2	68728	chr2:155381856-155389847:+	13.1663	13.1706	13.23	13.3592	13.3849	13.5861	13.2784	13.6213	12.8038	13.0151	12.8973	12.6841
Amdhd1	71761	chr10:93523338-93540033:-	12.3746	12.361	11.4652	12.4385	12.0237	11.858	12.0846	11.9828	12.5056	12.4683	12.5909	12.6815
Pygl	110095	chr12:70190815-70227683:-	12.5116	12.2758	11.7224	12.7237	12.4538	11.8952	12.3928	12.0912	12.87	12.7244	12.8075	12.679
Sdc2	15529	chr15:32920723-33034721:+	12.724	12.6051	12.2538	12.5776	12.7153	12.2323	12.7209	12.6049	12.5812	12.5223	12.5147	12.6779
Pipox	19193	chr11:77880615-77893872:-	12.6463	12.5732	11.1528	12.6564	12.3481	11.5692	12.3169	12.0498	12.7522	12.7255	12.6101	12.6776
Sel1l	20338	chr12:91806043-91849157:-	12.5837	12.6358	13.0193	12.7321	13.0672	13.4398	12.7045	13.4061	12.7073	12.7163	12.696	12.6772
Ndufa4	17992	chr6:11900373-11907446:-	12.5539	12.6704	12.3472	12.5281	12.3204	12.3145	12.5487	12.3237	12.6909	12.6879	12.7995	12.6671
Rpl19	19921	chr11:98026710-98030493:+	12.7343	12.8607	12.763	12.5613	12.5971	12.8043	12.7024	12.6653	12.6895	12.6757	12.8145	12.6633
Eif4a2	13682	chr16:23107397-23114138:+	12.5411	12.4726	12.1401	12.6398	12.3621	12.1237	12.6023	12.1325	12.7315	12.6617	12.6575	12.6632
Ddx3x	13205	chrX:13281022-13293983:+	12.5193	12.4035	13.0478	12.5634	12.6222	12.6856	12.5971	12.788	12.5356	12.6437	12.4437	12.6628
Mbl1	17194	chr14:41151456-41158959:+	12.7683	12.9998	12.8816	12.8845	12.8302	13.0412	12.8646	12.9032	12.8989	12.9469	12.8377	12.6622
Tm9sf3	107358	chr19:41210842-41264004:-	12.503	12.5122	12.9316	12.6269	12.6649	12.9371	12.6003	12.9469	12.6071	12.6278	12.5264	12.6608
Serinc1	56442	chr10:57515775-57532529:-	12.5988	12.5747	12.93	12.7337	12.7434	13.0032	12.7487	12.948	12.6398	12.6609	12.5843	12.6584
Acly	104112	chr11:100476352-100528000:-	12.2318	11.7857	11.851	12.1378	12.1478	12.1542	11.8785	12.1002	12.3835	12.3422	12.3267	12.6574
Grhpr	76238	chr4:44981394-44990734:+	12.9605	13.1182	13.3091	13.0238	13.1077	13.3909	13.2157	13.2405	12.9606	13.0497	12.9658	12.6573
Afm	280662	chr5:90518949-90553544:+	12.5539	12.4789	10.8291	12.4811	12.0061	10.7795	12.0753	11.7115	12.5525	12.5473	12.5983	12.6558
Rpl23	65019	chr11:97777526-97782439:-	12.7155	12.8392	12.8375	12.4855	12.626	12.729	12.6904	12.7145	12.6808	12.6114	12.7937	12.6548
Copa	12847	chr1:172082529-172122332:+	12.57	12.5846	13.1619	12.6786	12.7421	13.1567	12.5534	13.0515	12.6023	12.6673	12.6818	12.6502
Tor1aip2	240832	chr1:156035664-156068859:+	12.4482	12.3855	12.5138	12.6028	12.5297	12.4601	12.4635	12.5136	12.5919	12.5504	12.5091	12.645
Hnrnpk	15387	chr13:58391132-58403343:-	12.5815	12.558	12.804	12.6793	12.5964	12.6383	12.596	12.6866	12.6368	12.5918	12.5569	12.6411
Ctsz	64138	chr2:174427494-174439039:-	12.6636	12.7892	12.794	12.5684	12.6845	12.785	12.6415	12.7125	12.6279	12.6659	12.5788	12.6407
Pttg1ip	108705	chr10:77581767-77598732:+	12.6956	12.6635	12.3342	12.7307	12.6628	12.4878	12.7532	12.5545	12.6172	12.6886	12.7024	12.6406
Sec63	140740	chr10:42761496-42832514:+	12.5285	12.51	12.7751	12.5979	12.6849	12.8582	12.5469	12.8284	12.5983	12.5687	12.5227	12.6358
Abca6	76184	chr11:110176821-110251776:-	12.191	12.0153	12.2031	12.6457	12.6038	12.6229	12.4409	12.9452	12.3673	12.5205	12.2537	12.6354
Ugt2a3	72094	chr5:87324972-87337195:-	12.1289	11.8545	10.8448	12.3375	11.5811	11.0851	11.8429	11.3846	12.5553	12.3839	12.4168	12.6336
Ak2	11637	chr4:128993224-129011529:+	12.3957	12.4404	11.8059	12.5644	12.1626	11.6988	12.3016	11.9286	12.6652	12.7795	12.8875	12.6319
Tm9sf2	68059	chr14:122107082-122159603:+	12.5728	12.6154	12.874	12.7367	12.6413	12.7525	12.5726	12.8138	12.5575	12.5826	12.531	12.6265
Rpn2	20014	chr2:157279098-157326318:+	12.6832	12.7068	12.9622	12.679	12.8745	13.1253	12.788	13.1348	12.7094	12.6861	12.7228	12.6232
Mthfd1	108156	chr12:76255232-76319820:+	12.4543	12.2975	11.1838	12.5705	12.2418	11.5464	12.1814	11.8559	12.5789	12.4725	12.5177	12.6215
Msmo1	66234	chr8:64718145-64733578:-	12.7053	12.1196	12.8605	12.576	13.1848	13.4162	13.0019	13.062	12.7094	12.8243	12.8188	12.6212
Nipsnap1	18082	chr11:4874003-4894200:+	12.4969	12.4279	11.1278	12.5262	12.266	11.6322	12.393	11.9273	12.6306	12.6308	12.6344	12.6202
Bhmt2	64918	chr13:93656097-93674302:-	12.7945	12.6576	12.229	12.7475	12.904	12.7897	12.7929	12.8383	12.7517	12.7151	12.7903	12.6189
Lsr	54135	chr7:30957770-30973469:-	12.6921	12.6382	12.6152	12.6547	12.7551	12.8012	12.6106	12.7337	12.601	12.4729	12.4677	12.6158
Baat	12012	chr4:49489418-49506558:-	12.6824	12.4318	12.5496	12.5979	12.6641	12.5566	12.4422	12.4764	12.7041	12.6453	12.6482	12.6155
Cyp7b1	13123	chr3:18071950-18243338:-	12.8288	12.3603	12.7704	13.5075	12.811	13.5144	12.6836	12.6222	13.3534	12.7825	13.0728	12.6124
Chdh	218865	chr14:30009000-30040466:+	12.324	12.33	12.6408	12.6232	12.4291	12.3335	12.3554	12.5624	12.3954	12.6495	12.4516	12.6116
Entpd5	12499	chr12:84373876-84409029:-	12.5727	12.4907	11.8901	12.845	12.6405	11.9984	12.7087	12.1046	12.8197	12.9789	12.816	12.6105
Ly6e	17069	chr15:74955051-74959905:+	12.9598	12.9851	12.7099	12.8092	12.8037	12.9065	12.6673	12.9627	12.5949	12.4734	12.5203	12.6083
Pnpo	103711	chr11:96937816-96944019:-	12.6819	12.7185	12.786	12.7175	12.763	12.6695	12.6638	12.6827	12.6422	12.7232	12.6347	12.6076
Ece1	230857	chr4:137862237-137965229:+	12.5683	12.4951	11.7831	12.6503	12.644	12.1276	12.5342	12.5073	12.53	12.5636	12.5545	12.601
Gclm	14630	chr3:122245557-122267215:+	12.4869	12.4934	11.7387	12.6628	12.6034	11.7578	12.4911	12.046	12.4898	12.6372	12.495	12.5988
Ppa1	67895	chr10:61648621-61674165:+	12.6121	12.751	12.1935	12.7216	12.4765	12.4197	12.3394	12.457	12.5374	12.5014	12.5701	12.5976
Ugp2	216558	chr11:21321126-21371267:-	12.1656	12.0444	11.7215	12.3291	12.0171	11.805	12.3143	12.0483	12.6475	12.5149	12.5077	12.5936
Stra6l	74152	chr4:45848816-45887010:+	12.6084	12.5583	12.6908	12.571	12.5954	12.7523	12.4766	12.6635	12.5941	12.454	12.3825	12.5868
Ctsc	13032	chr7:88278085-88315861:+	12.6203	12.7971	12.6013	12.6995	12.6778	12.1134	12.574	12.5581	12.7358	12.584	12.681	12.579
Kif1b	16561	chr4:149176319-149307733:-	12.1164	12.0707	12.1588	12.3844	12.3919	12.1507	12.4073	12.3793	12.3624	12.5785	12.307	12.5758
Huwe1	59026	chrX:151803282-151935417:+	12.4325	12.244	12.4652	12.534	12.5666	12.4314	12.4621	12.573	12.5143	12.4955	12.3676	12.5757
Tmem106b	71900	chr6:13069759-13089269:+	12.2395	12.2004	11.941	12.4011	12.239	11.872	12.2897	12.0446	12.4492	12.5706	12.2922	12.5702
Rps27a	78294	chr11:29545842-29548040:-	12.5214	12.7029	12.8078	12.3596	12.503	12.768	12.5792	12.6036	12.5395	12.5264	12.672	12.5671
Tgm2	21817	chr2:158116405-158146392:-	12.7066	12.9014	14.1596	12.6885	12.6396	13.3813	12.6507	13.0778	12.4465	12.5763	12.5136	12.5628
Amy1	11722	chr3:113555952-113577750:-	12.1831	12.0901	11.8424	12.3189	12.3574	12.2966	12.3983	12.5939	12.3817	12.3798	12.4236	12.5601
Hacd3	57874	chr9:64986983-65021717:-	12.6417	12.6811	12.7366	12.8349	12.8011	12.8369	12.8622	12.8446	12.5313	12.7456	12.5508	12.5587
Rpl41	67945	chr10:128548110-128549168:-	12.6853	12.8441	12.8925	12.4453	12.7126	13.0494	12.8141	12.919	12.5397	12.5759	12.7069	12.5557
Selenof	93684	chr3:144570427-144597676:+	12.687	12.7507	12.8636	12.6455	12.7913	12.9889	12.7764	12.9419	12.6788	12.6649	12.7072	12.5552
Pank1	75735	chr19:34806936-34879455:-	12.2688	12.3428	11.2873	12.7304	12.4393	12.0314	12.6623	12.2785	12.595	12.8341	12.739	12.5552
Psmd2	21762	chr16:20651652-20663414:+	12.519	12.4743	12.608	12.6339	12.5169	12.5499	12.5836	12.4034	12.5895	12.5789	12.6007	12.5544
Eef1b2	55949	chr1:63176831-63180486:+	12.5078	12.6303	12.6705	12.4074	12.5115	12.597	12.6047	12.5686	12.5134	12.4863	12.6087	12.5514
Gne	50798	chr4:44034075-44084177:-	12.6313	12.7489	11.7907	12.774	12.6392	12.1583	12.6282	12.2493	12.7157	12.6749	12.6186	12.5505
Tef	21685	chr15:81802673-81826863:+	12.3846	12.4439	11.2963	12.5869	12.053	10.9365	12.2394	11.5852	12.4604	12.6109	12.5676	12.5483
Osbpl9	100273	chr4:109061145-109202272:-	12.4457	12.4992	12.2554	12.6223	12.4625	12.2195	12.4789	12.2773	12.5075	12.623	12.4701	12.5469
Pbld1	68371	chr10:63061617-63077536:+	12.5029	12.3401	11.6842	12.5444	12.5149	11.9748	12.5164	12.4418	12.5333	12.7004	12.5276	12.5462
Arhgef12	69632	chr9:42963842-43105718:-	12.2721	12.2262	12.5731	12.5922	12.4691	12.3879	12.4268	12.4533	12.4144	12.5641	12.2444	12.5442
Cox6a1	12861	chr5:115345654-115348955:-	12.4677	12.646	12.3298	12.4586	12.361	12.5208	12.4835	12.3533	12.5392	12.6414	12.7395	12.5427
Ddb1	13194	chr19:10605625-10629821:+	12.5189	12.496	12.8149	12.6428	12.5202	12.771	12.4743	12.6345	12.4831	12.5185	12.539	12.5395
Retreg2	227298	chr1:75142786-75147909:+	12.3865	12.4544	11.9868	12.565	12.2364	11.9983	12.3218	12.0766	12.4816	12.5534	12.5257	12.5389
Rps14	20044	chr18:60774596-60778546:+	12.5545	12.7149	12.7418	12.4078	12.4862	12.7485	12.6279	12.5963	12.5571	12.5516	12.7119	12.5355
Cyp2d22	56448	chr15:82370527-82380260:-	12.6401	12.4079	11.6649	12.5701	12.5034	12.0202	12.535	12.231	12.6637	12.483	12.6916	12.5355
Rpl17	319195	chr18:75000477-75003381:+	12.552	12.659	12.6157	12.356	12.4317	12.5845	12.5645	12.5293	12.5456	12.4648	12.6633	12.5353
Ddt	13202	chr10:75771233-75773374:-	12.2712	12.3814	11.2541	12.3435	11.9984	11.5395	12.1441	11.6759	12.4282	12.3655	12.6429	12.53
Ywhae	22627	chr11:75732887-75765841:+	12.4377	12.5202	12.5517	12.5181	12.3423	12.4313	12.4646	12.4535	12.4548	12.499	12.5125	12.5283
Elovl5	68801	chr9:77917365-77984519:+	12.3165	12.4327	12.0908	12.3751	12.0979	11.9483	12.3393	11.9041	12.4831	12.5983	12.5367	12.5275
Calm1	12313	chr12:100199435-100209824:+	12.5139	12.6061	12.6591	12.467	12.7132	12.9332	12.6319	12.8903	12.5662	12.6465	12.6565	12.5265
Ei24	13663	chr9:36779153-36797393:-	12.5441	12.6094	12.0823	12.4939	12.6636	12.431	12.7091	12.5809	12.4904	12.6167	12.4752	12.5216
Ogdh	18293	chr11:6291597-6359094:+	12.3718	12.3581	12.4074	12.5463	12.3328	12.4345	12.5623	12.4533	12.4273	12.4482	12.4978	12.5206
Slc25a13	50799	chr6:6041218-6217173:-	12.4623	12.3353	11.6499	12.7137	12.3517	11.7145	12.4966	12.0902	12.5394	12.6699	12.5632	12.5166
Rpl18a	76808	chr8:70894722-70897443:-	12.5522	12.7137	12.5316	12.3474	12.4402	12.5614	12.5565	12.4489	12.4958	12.5105	12.7138	12.5126
Rps24	20088	chr14:24490681-24496146:+	12.5215	12.6681	12.5825	12.3157	12.4248	12.5683	12.5656	12.4789	12.5139	12.448	12.5793	12.5069
Hgfac	54426	chr5:35041509-35048461:+	12.653	12.7021	11.6942	12.7255	12.4283	12.0597	12.3216	12.2624	12.731	12.7251	12.7273	12.5058
Nadk	192185	chr4:155562381-155591001:+	12.585	12.5054	11.9881	12.598	12.3698	11.9953	12.3309	12.1217	12.4267	12.5014	12.4677	12.5055
Esd	13885	chr14:74732297-74750765:+	12.4386	12.4386	11.7173	12.4332	12.1646	11.7353	12.4116	11.9642	12.4845	12.5307	12.5781	12.5045
Ndufs2	226646	chr1:171234853-171247122:-	12.2824	12.3074	12.1963	12.3955	12.2019	12.1789	12.5126	12.2198	12.388	12.5111	12.5056	12.5025
Aldh9a1	56752	chr1:167349991-167368530:+	12.4405	12.4644	12.1528	12.6496	12.4839	12.4773	12.6555	12.5752	12.6105	12.7509	12.7647	12.498
Cyp2d13	68444	chr15:82636750-82642045:-	12.5665	12.6341	10.951	12.8008	12.5166	11.5423	12.4281	12.1416	12.8172	12.7599	12.8472	12.4954
Uqcrc1	22273	chr9:108936648-108949641:+	12.3458	12.3696	12.0623	12.4106	12.1636	12.0912	12.3555	12.0373	12.5087	12.53	12.6516	12.4948
C130074G19Rik	226777	chr1:184871926-184883036:-	12.5194	12.5031	11.9613	12.5482	12.6454	12.3275	12.5936	12.5875	12.564	12.6129	12.6018	12.4892
0610005C13Rik	71661	chr7:45567795-45575176:-	12.3957	12.4504	11.5059	12.3576	12.4296	12.062	12.3334	12.2606	12.4167	12.4351	12.4749	12.4881
Uqcrq	22272	chr11:53427922-53430831:-	12.4673	12.7014	12.3413	12.3782	12.3653	12.5138	12.5465	12.4313	12.5264	12.5589	12.7256	12.4825
Nrn1	68404	chr13:36725622-36734477:-	12.226	12.0851	10.4496	11.9277	11.8273	10.7407	11.8961	11.3832	12.4723	12.1334	12.1622	12.4814
Malat1	72289	chr19:5795690-5802672:-	12.5075	12.176	12.3165	12.5285	12.5789	12.5895	12.6499	12.3276	12.7397	12.6525	12.7144	12.4796
Serpina6	12401	chr12:103646631-103657218:-	11.4793	11.977	8.78838	12.0429	10.0777	8.30967	10.5324	8.51636	12.2254	12.2771	12.3087	12.4792
Rad23b	19359	chr4:55350042-55392237:+	12.5255	12.4321	12.4278	12.5708	12.4817	12.4239	12.4483	12.3707	12.507	12.4335	12.4985	12.4752
Insr	16337	chr8:3150922-3279617:-	12.3365	12.3971	12.6463	12.5702	12.5745	12.5335	12.5257	12.6838	12.4208	12.5132	12.325	12.4741
Slc26a1	231583	chr5:108669881-108675365:-	12.3671	12.2713	11.7456	12.4944	12.2802	11.853	12.1295	12.0461	12.3975	12.4438	12.3235	12.4717
Uqcrc2	67003	chr7:120635189-120659523:+	12.2289	12.2218	12.0083	12.4206	12.05	12.0452	12.2401	12.0189	12.4612	12.4895	12.4716	12.4713
Atp5c1	11949	chr2:10056031-10080510:-	12.3097	12.3651	11.7833	12.3387	12.0411	11.9087	12.3394	11.9691	12.4622	12.4853	12.533	12.4707
Rpl11	67025	chr4:136049948-136053371:-	12.5099	12.6751	12.4903	12.3707	12.3902	12.4868	12.5028	12.4122	12.5524	12.4965	12.6567	12.4687
Scarb1	20778	chr5:125277087-125341094:-	12.499	12.6354	12.3243	12.4924	12.6424	12.4018	12.4941	12.5519	12.5348	12.5093	12.5024	12.4678
Abcc6	27421	chr7:45976380-46030286:-	12.1955	12.1987	10.9754	12.331	12.0675	11.406	11.995	11.8104	12.4543	12.4159	12.3972	12.4658
Laptm4a	17775	chr12:8921307-8938741:+	12.3816	12.4487	12.4372	12.3592	12.3114	12.4563	12.4134	12.4764	12.3772	12.3989	12.3832	12.4637
Pcbd1	13180	chr10:61089331-61094329:+	12.4645	12.4943	11.6379	12.3564	12.1474	11.8742	12.2445	11.9507	12.4793	12.4709	12.5888	12.4629
Csde1	229663	chr3:103020546-103058186:+	12.3609	12.3246	12.5163	12.4106	12.3086	12.3671	12.4233	12.287	12.4302	12.4046	12.3775	12.4612
Uqcrfs1	66694	chr13:30540312-30545316:-	12.2735	12.3419	12.0414	12.3717	12.1448	12.0915	12.3796	12.1371	12.4264	12.424	12.4539	12.4587
Rpl21	19933	chr5:146832890-146837032:+	12.4774	12.6426	12.5387	12.2795	12.3837	12.5266	12.4678	12.4987	12.4562	12.4041	12.565	12.4571
Cfhr1	50702	chr1:139547064-139560222:-	12.289	12.289	11.814	12.5837	12.1758	11.8183	12.2602	12.2222	12.4215	12.395	12.2782	12.4531
Ugdh	22235	chr5:65413222-65435842:-	12.2227	11.8979	11.2354	12.3521	11.9815	10.8099	11.8672	11.0164	12.3647	12.2358	12.1621	12.4498
Ugt2b35	243085	chr5:87000860-87013274:+	12.3041	12.0399	11.7569	12.3379	12.2624	11.8472	12.2049	11.8803	12.7314	12.5155	12.5695	12.4427
Xylb	102448	chr9:119357381-119393797:+	12.3828	12.4415	12.0416	12.4159	12.3028	11.9115	12.3117	12.1898	12.3381	12.4692	12.3182	12.4423
Rps11	27207	chr7:45122388-45124389:-	12.4358	12.5762	12.5763	12.2681	12.3393	12.5679	12.456	12.4632	12.4583	12.3865	12.5758	12.4379
Habp2	226243	chr19:56287912-56320820:+	12.2359	12.3807	11.9437	12.3668	12.2158	12.0774	12.1229	12.2978	12.3607	12.3142	12.2375	12.4323
Cd81	12520	chr7:143052750-143067930:+	12.638	12.6999	12.0502	12.6154	12.511	12.3414	12.6735	12.3899	12.6621	12.7002	12.6897	12.4315
1600014C10Rik	72244	chr7:38183217-38197565:+	12.4082	12.4782	11.8175	12.5802	12.5662	12.2925	12.4898	12.4973	12.3967	12.5902	12.5576	12.431
Slc38a2	67760	chr15:96687392-96699728:-	12.5781	12.7375	13.0998	12.4301	12.1738	12.6919	12.3917	12.418	12.16	12.2169	11.9921	12.4294
Gns	75612	chr10:121365090-121397245:+	12.45	12.4434	12.3441	12.5567	12.4119	12.4388	12.4093	12.4804	12.4211	12.4883	12.4704	12.428
Acaa1a	113868	chr9:119341294-119350295:+	12.5246	12.7847	12.1718	12.7845	12.639	12.6963	12.8109	12.7505	12.6151	12.8642	12.7769	12.4269
Rpl5	100503670	chr5:107900528-107909005:+	12.3546	12.4802	12.5385	12.2231	12.3117	12.4779	12.4031	12.378	12.3441	12.3459	12.4571	12.4227
Rps12	20042	chr10:23785183-23787209:-	12.5307	12.7007	12.8356	12.2106	12.5386	12.8472	12.6297	12.6753	12.4176	12.3789	12.5959	12.4208
Rps25	75617	chr9:44407714-44410406:+	12.4373	12.5936	12.611	12.2632	12.3653	12.6263	12.4767	12.5084	12.4415	12.3965	12.5734	12.4199
Slc25a22	68267	chr7:141429749-141437874:-	12.0907	12.2359	12.4704	12.1178	12.0273	12.5196	12.2262	12.437	12.2063	12.2447	12.1865	12.417
Arcn1	213827	chr9:44742144-44767808:-	12.4707	12.4228	12.9115	12.5368	12.5061	12.8997	12.3232	12.7897	12.3993	12.3694	12.4097	12.4169
Rpl12	269261	chr2:32961712-32964045:+	12.3951	12.4829	12.7179	12.1353	12.4051	12.6775	12.4765	12.5442	12.3931	12.305	12.5908	12.4164
Etfdh	66841	chr3:79603788-79628767:-	12.325	12.3028	12.706	12.5791	12.5981	12.6723	12.7071	12.6863	12.4402	12.6854	12.4714	12.4159
Prpf8	192159	chr11:75486777-75509447:+	12.3182	12.1765	12.1154	12.5109	12.3236	12.134	12.1997	12.2492	12.3871	12.452	12.3481	12.4147
Slc35d1	242585	chr4:103170651-103215176:-	12.3035	12.4084	12.0152	12.3749	12.2853	11.8373	12.1702	12.0485	12.2563	12.3972	12.2893	12.4122
Agpat3	28169	chr10:78271563-78351700:-	12.53	12.61	12.5331	12.6416	12.7219	12.7515	12.7299	12.7791	12.4712	12.658	12.6041	12.4112
Srsf5	20384	chr12:80945499-80950506:+	12.1226	12.0902	12.0204	12.0916	12.3002	12.1696	12.2829	12.1415	12.428	12.2446	12.2649	12.4112
Xdh	22436	chr17:73883895-73950196:-	12.3087	12.2148	11.9723	12.3241	12.1537	12.0318	12.1842	12.1322	12.359	12.2988	12.3462	12.409
Rpl14	67115	chr9:120571517-120574653:+	12.4105	12.5436	12.4329	12.2201	12.2332	12.3876	12.3905	12.2999	12.3839	12.3286	12.5167	12.4088
Sqor	59010	chr2:122765359-122809551:+	11.9899	11.9728	11.2568	12.1031	11.6282	11.0866	11.8165	11.4214	12.1375	12.221	12.1925	12.4085
Lipa	16889	chr19:34492316-34527474:-	12.195	12.0615	11.749	12.2239	12.3593	12.0122	12.2722	12.2147	12.3393	12.4942	12.3887	12.4042
Rapgef4	56508	chr2:71981215-72257474:+	12.1031	12.1439	11.9015	12.2258	11.9374	11.9629	12.0446	11.8265	12.2747	12.1055	12.4111	12.4031
Itgb1	16412	chr8:128685654-128733579:+	12.2373	12.2018	12.3178	12.3143	12.3925	12.3081	12.3988	12.3346	12.3451	12.3419	12.2116	12.4029
Caprin1	53872	chr2:103762945-103797640:-	12.5254	12.3545	12.3697	12.562	12.5032	12.4626	12.3856	12.4756	12.4793	12.4204	12.3764	12.4007
Aldh1a7	26358	chr19:20692953-20727556:-	12.3075	12.3013	12.8313	12.3825	12.4756	12.4018	12.6767	12.6149	12.5549	12.6725	12.6219	12.4007
Rnf10	50849	chr5:115241770-115272895:-	12.4391	12.4257	12.586	12.4208	12.4419	12.5874	12.5003	12.4305	12.3471	12.43	12.4431	12.3999
C2	12263	chr17:34862602-34882100:-	12.2609	12.3116	11.8313	12.4409	12.286	12.2731	12.036	12.4591	12.4972	12.3033	12.2701	12.3997
Epas1	13819	chr17:86753864-86833410:+	12.181	12.3113	12.3518	12.3471	12.3385	12.5305	12.4177	12.6436	12.09	12.3031	12.1783	12.3974
Atp13a3	224088	chr16:30312424-30388530:-	12.2349	12.0645	12.5011	12.3706	12.3599	12.5774	12.3353	12.5947	12.3144	12.3769	12.2566	12.3972
Pcyox1	66881	chr6:86386006-86397150:-	12.3309	12.1991	11.9752	12.5115	12.3526	12.1226	12.3892	12.2188	12.4118	12.5094	12.4216	12.3944
Slc3a1	20532	chr17:85028347-85064241:+	12.1708	12.0475	11.8001	12.336	12.4991	12.1371	12.0447	12.4112	11.9295	11.9103	11.595	12.3916
Slc6a13	14412	chr6:121300296-121337718:+	12.4064	12.3902	11.7566	12.3536	12.4743	12.0611	12.4067	12.3307	12.4124	12.4488	12.6073	12.3902
Eci2	23986	chr13:34977748-34994144:-	12.523	12.644	12.854	12.6507	12.6472	12.8676	13.0231	12.88	12.4475	12.7485	12.7442	12.3884
Rpn1	103963	chr6:88084473-88105304:+	12.2561	12.5717	13.1601	12.3013	12.6267	13.3547	12.3757	13.1618	12.4174	12.4131	12.572	12.3883
Rps15	20054	chr10:80292431-80294114:+	12.4866	12.6242	12.3848	12.2599	12.3482	12.4208	12.4626	12.3777	12.4507	12.4296	12.6417	12.3882
Cmah	12763	chr13:24327404-24477289:+	12.2886	12.2553	12.276	12.5174	12.1657	12.0359	12.0881	12.2777	12.5106	12.3997	12.3175	12.3878
Klf15	66277	chr6:90462576-90479686:+	12.6525	12.6257	11.3993	12.5397	12.0602	11.59	12.1631	11.959	12.3552	12.3855	12.3635	12.3859
Tram1	72265	chr1:13564693-13589910:-	12.4847	12.5577	12.9645	12.4009	12.5824	13.0605	12.3522	12.9885	12.4609	12.3268	12.5326	12.385
Abcc3	76408	chr11:94343295-94392976:-	12.3458	12.2305	11.3749	12.3973	12.1588	11.6523	12.4097	11.646	12.5414	12.7691	12.6613	12.3841
Hdgf	15191	chr3:87906321-87916132:+	12.1785	12.2537	11.9515	12.2451	11.9672	11.8484	12.1324	11.8979	12.2489	12.3241	12.3822	12.3834
Kyat3	229905	chr3:142701048-142744911:+	12.2898	12.1649	12.2251	12.4669	12.3047	12.1501	12.2182	12.3049	12.4793	12.2589	12.6698	12.3798
Ldlr	16835	chr9:21723576-21749918:+	12.3561	12.0347	11.9045	12.2204	12.4402	12.1221	12.1502	12.244	12.329	12.3693	12.3674	12.3793
Atp5d	66043	chr10:80142275-80145828:+	12.2975	12.3837	11.916	12.2428	12.0887	12.1152	12.275	12.0363	12.3155	12.3774	12.5136	12.3789
Rps20	67427	chr4:3831584-3835655:-	12.5069	12.6809	12.588	12.2586	12.4572	12.5435	12.5196	12.5484	12.4019	12.3547	12.5278	12.378
Rab7	19349	chr6:87999106-88045270:-	12.3944	12.4233	12.3814	12.3602	12.2337	12.3095	12.3207	12.3463	12.3411	12.3507	12.3277	12.3768
2610507B11Rik	72503	chr11:78261754-78290625:+	12.3098	12.2304	12.0688	12.5084	12.3908	12.1676	12.4005	12.3728	12.364	12.5405	12.3243	12.3765
Grina	66168	chr15:76246807-76249904:+	12.6124	12.6631	12.8498	12.4908	12.4995	13.0092	12.6018	12.6416	12.4569	12.4812	12.5282	12.3747
Uba1	22201	chrX:20658302-20683179:+	12.3641	12.3169	12.4385	12.3894	12.271	12.4441	12.2376	12.4184	12.3681	12.3292	12.3665	12.3746
Clmn	94040	chr12:104763114-104865076:-	11.963	11.9375	11.8056	12.3902	11.9652	11.8137	11.9558	11.9984	12.2482	12.402	12.1124	12.3738
Paqr9	75552	chr9:95559817-95562121:+	12.7837	12.7369	12.918	12.9184	13.085	12.7243	12.9315	12.7303	12.6428	12.8482	12.7196	12.3732
Larp1	73158	chr11:58009064-58062032:+	12.2485	12.1171	12.418	12.2307	12.3774	12.4608	12.2665	12.4573	12.3398	12.2551	12.242	12.3718
Sidt2	214597	chr9:45937857-45955249:-	12.4866	12.451	12.5699	12.5834	12.4851	12.6106	12.4331	12.5157	12.3789	12.4193	12.4473	12.3693
Fech	14151	chr18:64456542-64489098:-	12.0509	12.1438	11.7192	12.2264	12.0366	11.775	12.0596	12.0179	12.2791	12.3439	12.2591	12.3624
Prkd3	75292	chr17:78949405-79020816:-	12.061	11.833	11.3616	12.2381	12.2409	11.6354	12.0466	12.1342	12.2758	12.3455	12.1238	12.3604
Plcxd2	433022	chr16:45959261-46010413:-	12.1143	11.9571	12.1409	12.2949	12.307	12.343	12.2831	12.6114	12.182	12.1721	11.916	12.3601
Acadl	11363	chr1:66830839-66863309:-	12.2558	12.3606	12.5032	12.3777	12.2713	12.4679	12.6278	12.4527	12.3365	12.5946	12.4232	12.3595
Hectd1	207304	chr12:51743722-51829536:-	12.1698	12.0898	12.5645	12.4776	12.5565	12.6871	12.4705	12.7821	12.3285	12.4022	12.2813	12.3592
Hebp1	15199	chr6:135137519-135168215:-	12.3923	12.5168	11.1618	12.429	12.2583	11.6	12.3337	12.0229	12.4769	12.4509	12.4827	12.3564
Litaf	56722	chr16:10959273-10993121:-	12.4302	12.6982	13.1529	12.525	12.4842	12.7037	12.4634	12.5385	12.2365	12.272	12.1263	12.3563
Rpl13	270106	chr8:123102350-123105242:+	12.4008	12.4838	12.4223	12.2215	12.2996	12.5082	12.3984	12.3238	12.322	12.3558	12.5072	12.3562
Chpt1	212862	chr10:88472813-88503970:-	12.3028	12.3122	12.0676	12.5379	12.45	12.2514	12.6866	12.6311	12.4126	12.6891	12.4364	12.356
Selenot	69227	chr3:58576636-58593546:+	12.3493	12.318	12.4927	12.4361	12.2742	12.417	12.3753	12.4922	12.4026	12.3673	12.2992	12.3547
Vdac1	22333	chr11:52360862-52389397:+	12.1855	12.1494	11.6946	12.2899	11.9329	11.6738	12.325	11.7485	12.2529	12.3051	12.3436	12.3545
Rpl32	19951	chr6:115805514-115808743:-	12.3995	12.5226	12.3901	12.1744	12.2263	12.4549	12.3823	12.2917	12.39	12.3244	12.5081	12.3539
Etnk1	75320	chr6:143167230-143208547:+	12.0298	11.976	12.209	12.2565	12.0802	12.1118	12.0081	12.2906	11.9608	12.1217	12.06	12.3526
Masp2	17175	chr4:148602544-148615480:+	12.3965	12.3185	11.8444	12.5505	12.3784	12.1486	12.2237	12.3259	12.4345	12.3923	12.326	12.3526
Mlec	109154	chr5:115142981-115158176:-	12.4766	12.5721	12.8318	12.4898	12.7102	12.9575	12.406	12.9368	12.3235	12.4073	12.4175	12.3526
Ncl	17975	chr1:86344719-86359455:-	12.1821	12.2523	12.4052	12.2599	12.0814	12.1537	12.1567	12.0512	12.2573	12.286	12.3107	12.3523
Rpl28	19943	chr7:4792965-4794547:+	12.4485	12.5915	12.4047	12.2173	12.2551	12.4384	12.3524	12.3856	12.3909	12.3112	12.5332	12.3518
Arl6ip1	54208	chr7:118118890-118129625:-	12.3892	12.4143	11.6266	12.5087	12.1507	11.7121	12.3221	11.856	12.4273	12.5668	12.4874	12.351
Prodh2	56189	chr7:30493658-30513402:+	12.4126	12.4148	10.127	12.4369	12.1445	10.6197	12.1485	11.531	12.422	12.4102	12.4916	12.3482
Cyp2c68	433247	chr19:39688836-39741101:-	12.0082	11.8006	9.55951	12.2103	11.6322	10.0061	11.7157	10.6878	12.2501	11.966	12.1454	12.3463
H2-T23	15040	chr17:36029977-36032701:-	12.2511	12.3593	11.6943	12.3493	12.0583	11.7716	12.0008	11.9797	12.3639	12.3248	12.2926	12.3461
Tkfc	225913	chr19:10592197-10604258:-	12.4234	12.5258	12.478	12.7425	12.2963	12.3398	12.3532	12.3331	12.3528	12.575	12.4794	12.3442
Kynu	70789	chr2:43555325-43683048:+	12.0046	11.8176	11.3557	12.1475	11.8047	11.5959	11.7704	11.7317	12.1902	12.0134	11.9242	12.3439
Bnip3	12176	chr7:138890836-138909506:-	12.2064	12.2409	12.0015	12.3143	12.0738	11.2219	12.3591	11.7505	12.1057	12.3446	12.2778	12.3401
Vegfa	22339	chr17:46016993-46032377:-	12.2354	12.0792	12.208	12.0935	12.1474	11.6789	11.974	11.9818	12.2939	12.1247	12.2163	12.3398
Copz1	56447	chr15:103272918-103299864:+	12.2903	12.4373	12.1756	12.2818	12.2174	12.4193	12.2587	12.3659	12.3638	12.3885	12.4944	12.3395
H2-D1	14964	chr17:35263094-35267497:+	12.6924	12.7348	12.7546	12.5039	12.4323	12.6836	12.5974	12.4678	12.4418	12.4691	12.4657	12.3391
Dynll2	68097	chr11:87979525-87998298:-	12.138	12.0456	11.4694	12.1873	11.8894	11.4566	11.9611	11.5842	12.3136	12.3082	12.2709	12.3368
Ubr4	69116	chr4:139380659-139489532:+	12.3241	12.0965	12.3817	12.3709	12.2955	12.214	12.247	12.3438	12.2862	12.2848	12.1981	12.3357
Slc29a1	63959	chr17:45585200-45599603:-	12.6932	12.6156	11.2639	12.4365	12.3419	11.7932	12.2814	11.9224	12.5868	12.4227	12.5203	12.3348
Rmnd5a	68477	chr6:71388634-71440637:-	12.0124	11.923	11.7953	12.1871	12.0491	11.9067	12.1305	11.9854	12.1797	12.3052	12.0826	12.3307
Rps6	20104	chr4:86854099-86857367:-	12.2945	12.3714	12.4643	12.1429	12.2334	12.4621	12.2965	12.3702	12.2554	12.2126	12.3871	12.327
Rps16	20055	chr7:28350689-28352698:+	12.3463	12.4296	12.5978	12.1234	12.2551	12.5972	12.342	12.4568	12.2833	12.2335	12.4076	12.322
Tcf25	66855	chr8:123373711-123404174:+	12.1977	12.2452	12.4189	12.2726	12.2296	12.4561	12.2218	12.3289	12.2645	12.3104	12.3068	12.3213
Pgk1	18655	chrX:106187100-106203699:+	12.1064	12.0557	12.3394	12.2311	12.069	12.1075	12.1533	12.0377	12.2522	12.2894	12.3155	12.3211
Slc25a10	27376	chr11:120491837-120501161:+	12.4081	12.4155	11.4351	12.5548	12.0925	11.7214	12.434	11.9285	12.3814	12.7147	12.6493	12.3169
Echdc2	52430	chr4:108165437-108179308:+	12.2742	12.2918	11.8377	12.2095	12.2248	12.0707	12.2147	12.068	12.3898	12.3645	12.4242	12.3165
Acox2	93732	chr14:8225511-8259019:-	12.4134	12.3301	13.0454	12.4949	12.6674	13.201	12.4809	12.9899	12.3998	12.3483	12.3642	12.3136
Coq8a	67426	chr1:180165238-180196020:-	12.1378	11.7801	10.3486	11.9778	12.1284	10.9999	12.3799	11.4469	12.5846	12.3379	12.469	12.31
Nucb1	18220	chr7:45492674-45510408:-	12.361	12.3621	12.2473	12.3566	12.3905	12.3887	12.393	12.4093	12.3816	12.4419	12.455	12.3085
Sod2	20656	chr17:13007839-13018119:+	12.2618	12.3753	13.5702	12.458	12.2247	13.6939	12.5042	13.2546	12.328	12.4139	12.3811	12.308
Myo1b	17912	chr1:51749758-51915978:-	12.3611	12.0898	12.168	12.2695	12.4086	12.4256	12.3492	12.5184	12.3485	12.2675	12.0966	12.3075
Agpat2	67512	chr2:26593057-26604417:-	12.6186	12.6797	12.7199	12.5617	12.6649	12.8711	12.5164	12.669	12.4491	12.5193	12.5924	12.3043
Ivd	56357	chr2:118862000-118881357:+	12.0821	12.0044	10.6697	12.2059	11.7478	11.0565	11.8673	11.4765	12.2023	12.1994	12.1911	12.3034
Fam120a	218236	chr13:48879217-48967828:-	12.2231	12.1916	12.0152	12.3427	12.2178	12.0485	12.2055	12.1102	12.3222	12.3387	12.2695	12.3028
Acsf2	264895	chr11:94557102-94601786:-	12.3726	12.4036	12.0273	12.6232	12.3234	12.0797	12.4974	12.1081	12.5888	12.6837	12.6313	12.3013
Hmgcr	15357	chr13:96648962-96670936:-	11.7151	11.0886	11.4703	11.27	11.8437	11.8387	11.3221	11.5626	11.4572	11.6466	11.7602	12.2925
Vwa8	219189	chr14:78849178-79202310:+	12.2316	12.3787	12.7382	12.6733	12.6149	12.7646	12.7991	12.8058	12.4661	12.8461	12.5913	12.2911
Fau	14109	chr19:6057888-6059524:+	12.2877	12.4512	12.2718	12.1587	12.1252	12.2907	12.2475	12.1547	12.2504	12.285	12.4591	12.2902
Rps17	20068	chr7:81342733-81345234:-	12.3587	12.4965	12.3852	12.1564	12.2222	12.386	12.3819	12.2657	12.3626	12.2938	12.4615	12.29
Dstn	56431	chr2:143915331-143943324:+	12.097	12.134	12.3693	12.1684	12.0612	12.2511	12.0702	12.2275	12.1703	12.1892	12.2082	12.2899
Ybx1	22608	chr4:119277327-119294513:-	12.0959	12.1931	12.1	12.128	11.9788	12.1064	12.1255	12.0055	12.2016	12.2453	12.3075	12.2893
Urah	76974	chr7:140835138-140837971:+	12.2748	12.3549	11.8563	12.2446	12.033	11.9441	12.1777	11.8746	12.3434	12.3178	12.4369	12.2849
Eef1g	67160	chr19:8967041-8978180:+	12.2913	12.4017	12.53	12.2049	12.3156	12.577	12.4045	12.4916	12.2958	12.2623	12.3852	12.2828
F13b	14060	chr1:139501707-139523756:+	12.1237	12.0438	11.2848	12.4068	12.0923	11.5575	12.0508	11.9762	12.3518	12.3278	12.1846	12.2818
Cyp1a2	13077	chr9:57676937-57683655:-	12.1474	11.8367	9.95974	12.472	10.4928	9.5555	11.2218	9.67318	13.095	12.4459	12.8068	12.2808
Gpx4	625249	chr10:80047166-80056439:+	12.3474	12.4117	12.0056	12.1982	12.2266	12.1483	12.4023	12.0459	12.2523	12.3823	12.487	12.2807
Prdx5	54683	chr19:6906819-6909645:-	12.3091	12.3495	12.1978	12.3147	12.1897	12.3207	12.3265	12.1878	12.4507	12.3816	12.5124	12.2801
Anpep	16790	chr7:79821803-79848210:-	12.3575	12.3831	12.0746	12.5187	12.4503	12.2847	12.4709	12.5194	12.2536	12.4048	12.3292	12.2798
Tst	22117	chr15:78399556-78405859:-	12.3367	12.3421	11.3578	12.2511	11.9479	11.73	12.1783	11.6967	12.4422	12.3946	12.4711	12.2758
Cyp4a12a	277753	chr4:115299046-115332815:+	12.4851	12.4654	12.125	12.7223	12.4243	12.1953	12.6053	12.0364	12.7015	12.9637	12.6506	12.2699
Shmt2	108037	chr10:127517123-127522444:-	12.4089	12.3248	11.8626	12.4534	12.1199	11.6305	12.185	11.7105	12.412	12.3854	12.5468	12.2696
Luc7l2	192196	chr6:38551334-38609470:+	12.2717	12.1506	12.1215	12.2269	12.1911	12.1498	12.1319	12.2593	12.434	12.2409	12.1881	12.2687
Raph1	77300	chr1:60483185-60566765:-	12.4386	12.324	13.212	12.287	12.6052	13.0926	12.3914	13.033	12.1588	11.9428	11.7896	12.2686
Skp1a	21402	chr11:52231995-52246858:+	12.2798	12.3436	11.7633	12.3247	12.0597	11.8535	12.2522	11.8497	12.3048	12.3694	12.3782	12.2674
Son	20658	chr16:91647824-91679192:+	12.1586	12.0162	12.4665	12.2683	12.2756	12.4857	12.1904	12.3558	12.2693	12.1557	12.0771	12.2671
Nadk2	68646	chr15:9071260-9110496:+	11.9223	11.7817	11.6427	12.2014	11.9387	11.783	11.9246	11.9317	12.2046	12.2769	12.1668	12.2648
March6	223455	chr15:31455899-31531037:-	12.2382	12.15	12.4514	12.4592	12.3826	12.3651	12.4109	12.4648	12.3522	12.3425	12.2493	12.2613
Naca	17938	chr10:128035346-128048637:+	12.2176	12.3302	11.9764	12.1792	12.0039	11.8715	12.2841	11.8486	12.2158	12.2104	12.3203	12.2602
Cyp8b1	13124	chr9:121914356-121916305:-	12.3661	11.703	9.45433	12.5387	12.7237	10.8082	12.1327	10.8431	12.8204	12.6808	12.1118	12.2559
Gpr146	80290	chr5:139380667-139396414:+	11.5117	11.5316	11.4502	11.7833	11.9225	11.042	11.6316	11.3296	11.8328	11.8538	11.6983	12.255
Tmem183a	57439	chr1:134346097-134361999:-	12.0127	12.1326	11.5736	12.1021	11.854	11.6326	11.9213	11.7162	12.1042	12.1031	12.148	12.2545
Asgr2	11890	chr11:70092644-70106186:+	12.2642	12.3313	11.283	12.234	11.9439	11.556	12.1171	11.7934	12.3318	12.3255	12.424	12.2455
Lasp1	16796	chr11:97799672-97838764:+	12.318	12.1785	12.0183	12.3598	12.379	12.3382	12.1581	12.4526	12.2693	12.1842	12.2388	12.2449
Ireb2	64602	chr9:54863755-54912534:+	11.6769	11.6321	11.7949	12.0262	11.7	11.7036	11.7387	11.6876	11.9981	11.9677	11.8496	12.2437
C1rl	232371	chr6:124493113-124510643:+	12.2475	12.3147	12.2693	12.3418	12.3511	12.4626	12.3308	12.546	12.3001	12.2955	12.2372	12.2418
Tmem56	99887	chr3:121202010-121263316:-	12.1404	12.1545	12.6582	12.4766	12.4855	13.1113	12.633	12.838	12.3714	12.599	12.5591	12.2371
Il6st	16195	chr13:112464070-112506860:+	11.9725	11.9303	12.5067	12.321	12.3339	12.3828	12.2307	12.3525	12.0169	12.0979	11.8992	12.2328
Tuba4a	22145	chr1:75214972-75219294:-	12.3294	12.1813	11.9883	12.1257	11.9787	11.8823	11.9882	11.9113	12.3282	12.1242	12.5031	12.232
Nudt4	71207	chr10:95547007-95564167:-	12.2723	12.327	12.5421	12.3044	12.2023	12.1844	12.2583	12.1024	12.2373	12.2913	12.2472	12.2297
Epn1	13854	chr7:5080235-5098178:+	12.2037	12.2475	11.8689	12.1903	12.1301	11.9832	12.1807	12.0205	12.1836	12.3235	12.3338	12.2287
Derl1	67819	chr15:57869502-57892418:-	12.2632	12.4233	12.647	12.2943	12.3987	12.6976	12.3454	12.5547	12.2684	12.2659	12.3312	12.228
Mdh2	17448	chr5:135778649-135790386:+	12.1729	12.2183	12.0473	12.1934	11.9917	12.118	12.2751	11.9797	12.2254	12.2048	12.3236	12.2279
Txnrd1	50493	chr10:82833951-82897724:+	12.1916	12.2716	12.4934	12.399	12.2821	12.0966	12.2648	12.012	12.2398	12.2987	12.2217	12.2269
Stard4	170459	chr18:33199138-33213862:-	11.7871	11.3963	11.7565	11.8531	11.9894	11.7964	11.8027	11.7846	11.9981	12.0396	12.1135	12.2247
Prg4	96875	chr1:150449412-150466165:-	12.5392	12.9421	12.2821	12.7481	12.4425	12.0287	12.3871	12.649	12.2912	12.3355	12.1782	12.2241
Mknk2	17347	chr10:80665318-80676293:-	12.3376	12.3917	11.8735	12.4689	11.8624	11.759	12.2893	11.6283	11.9814	12.2273	12.0446	12.2234
Cfl1	12631	chr19:5490455-5494031:+	12.2716	12.3642	12.4413	12.1231	12.1116	12.3513	12.1705	12.2329	12.2332	12.2022	12.3759	12.2228
Adi1	104923	chr12:28675207-28682174:+	12.1657	12.2044	11.6102	12.3416	12.0637	11.6776	12.2363	11.9222	12.2288	12.3445	12.331	12.2224
Tspan12	269831	chr6:21771395-21852515:-	12.0184	12.0345	11.7519	12.225	11.9487	11.7514	12.085	11.9473	12.281	12.2426	12.1971	12.2216
H13	14950	chr2:152669461-152708668:+	12.2769	12.4415	12.8099	12.157	12.3396	12.8629	12.2701	12.6857	12.3097	12.2698	12.4886	12.22
Myo18a	360013	chr11:77777235-77865988:+	12.1867	12.1633	12.3383	12.2674	12.4757	12.3875	12.2162	12.5181	12.1105	12.1687	12.0021	12.2196
Gckr	231103	chr5:31297581-31327302:+	12.1647	12.0725	11.6522	11.9714	12.0393	11.7965	12.0915	12.0161	12.1804	12.093	12.1015	12.2193
Dpys	64705	chr15:39768485-39857470:-	12.2918	12.1562	10.1084	12.2659	12.1354	10.5518	12.2517	11.4716	12.2545	12.4401	12.528	12.2165
Tax1bp1	52440	chr6:52713729-52766779:+	12.2628	12.2133	12.3094	12.3552	12.2929	12.336	12.322	12.2954	12.2663	12.2693	12.2461	12.2136
Map1lc3b	67443	chr8:121590468-121598047:+	12.2991	12.4394	12.5962	12.3181	12.4373	12.706	12.6166	12.5513	12.0962	12.1915	12.1507	12.2114
Sdhd	66925	chr9:50596340-50603849:-	12.1058	12.0599	11.5784	12.112	12.0707	11.8035	12.1144	11.8297	12.1816	12.2599	12.1949	12.2112
Dcaf8	98193	chr1:172148015-172196393:+	12.096	12.0517	12.1771	12.186	12.1378	12.0814	12.1862	12.1408	12.2184	12.2556	12.2018	12.2049
Psme4	103554	chr11:30771775-30880361:+	12.0092	11.9021	12.1945	12.2013	12.1882	12.2013	12.207	12.1684	12.162	12.2086	12.1232	12.1999
Cyp4f14	64385	chr17:32905070-32917342:-	11.8667	11.3319	9.13903	11.7893	10.8989	9.3812	10.9136	9.89424	12.1353	11.9201	11.8706	12.1991
Maob	109731	chrX:16709281-16817366:-	11.9634	11.9019	10.6883	12.0776	11.6398	10.8011	11.7867	11.2773	12.1243	12.1458	12.1649	12.1989
Mcl1	17210	chr3:95658721-95663178:+	11.8636	11.8477	11.7704	12.0083	11.8642	11.5222	11.8967	11.6325	11.9977	11.8883	11.8717	12.1987
Hmgcl	15356	chr4:135946453-135962617:+	12.2331	12.3039	11.917	12.2501	12.2191	12.1154	12.3448	12.1291	12.2799	12.5702	12.4857	12.1976
Saa3	20210	chr7:46711998-46715676:-	15.6599	15.1221	16.9981	14.9208	16.4621	17.2053	16.4769	17.294	12.2763	12.1839	12.1596	12.1938
Lypla1	18777	chr1:4807823-4846735:+	12.1537	11.9966	11.6359	12.3041	12.0175	11.6644	12.1455	11.8689	12.2685	12.2161	12.1603	12.1934
Mut	17850	chr17:40934685-40961989:+	11.9186	11.8113	11.4781	12.1748	11.9417	11.8707	11.8826	11.9695	12.16	12.1636	12.0141	12.1928
Slco2b1	101488	chr7:99657804-99711340:-	12.1895	12.1773	11.3089	12.4095	12.047	11.642	12.1075	11.9354	12.2949	12.3448	12.2929	12.1924
Txn1	22166	chr4:57943373-57956411:-	12.21	12.3071	12.163	12.1709	11.9603	12.245	12.1124	12.0974	12.2369	12.2414	12.3519	12.1924
Rpl18	19899	chr7:45718071-45720835:+	12.2261	12.3564	12.3169	12.119	12.0752	12.2886	12.2273	12.0962	12.2026	12.1858	12.3597	12.1915
Neat1	66961	chr19:5824710-5845480:-	12.6024	12.1165	12.0651	12.2263	13.1838	13.1743	12.7157	12.7791	12.6674	11.9742	12.4408	12.1852
Slco1a1	28248	chr6:141907281-141946962:-	11.7234	11.4726	9.84501	12.1417	10.7296	10.0191	11.0472	10.223	12.7374	12.5211	12.4243	12.1831
Phb2	12034	chr6:124712289-124716945:+	12.1264	12.1913	11.7021	12.1797	11.8664	11.7163	12.0822	11.7666	12.1209	12.2313	12.3126	12.1812
Ctdsp1	227292	chr1:74391609-74397285:+	12.0079	12.0601	11.7108	12.072	11.9957	11.7811	11.9697	11.9718	12.0085	12.0812	12.0522	12.181
Lactb2	212442	chr1:13625900-13660509:-	11.9572	11.6942	11.1812	12.1796	11.6907	11.3092	11.7324	11.4609	12.2816	12.1676	12.1813	12.1808
Pccb	66904	chr9:100982032-101034884:-	11.8914	11.9206	11.704	12.0695	11.8002	11.7757	11.9278	11.8422	12.1255	12.1955	12.1792	12.1803
Slc1a2	20511	chr2:102658683-102790784:+	12.2306	12.1333	10.7101	12.3614	11.8658	11.0909	12.2063	11.4503	12.1843	12.2135	12.0173	12.1802
Zfp445	235682	chr9:122848910-122866006:-	12.2077	12.1345	11.9963	12.3455	12.1219	12.0543	12.1109	12.1941	11.8808	11.9535	11.7816	12.1758
Nisch	64652	chr14:31170928-31206826:-	12.2836	12.2633	12.2463	12.3248	12.2279	12.3388	12.1705	12.2732	12.1947	12.1921	12.1695	12.1756
Cyp4a14	13119	chr4:115486200-115496141:-	12.8488	12.8996	10.6227	12.3054	13.2373	10.9054	14.1133	11.9534	11.3276	13.4013	12.5274	12.1754
Ccni	12453	chr5:93181933-93206495:-	12.0659	12.0711	12.3378	12.1128	12.1916	12.3311	12.2173	12.2873	12.1298	12.1163	12.1176	12.1751
Txn2	56551	chr15:77915051-77928994:-	12.1872	12.3114	11.8684	12.1814	12.0058	12.0073	12.0769	11.9369	12.1739	12.192	12.3192	12.175
St6gal1	20440	chr16:23224740-23360350:+	11.8777	12.3234	13.6958	11.8925	12.4972	13.4457	12.3553	13.422	11.9121	12.1874	11.8925	12.172
Eif4h	22384	chr5:134619872-134639409:-	12.1622	12.2	12.132	12.1915	12.0641	12.1625	12.1335	12.0467	12.0877	12.2156	12.2422	12.1652
Gucd1	68778	chr10:75506814-75517972:-	12.2271	12.2568	11.9868	12.2316	12.4831	12.4115	12.3283	12.3948	12.1036	12.1918	12.2607	12.1629
Dlst	78920	chr12:85110833-85134091:+	12.1533	12.0716	11.967	12.3206	12.0144	12.1601	12.1952	12.0348	12.1941	12.2752	12.2142	12.1613
Rnf13	24017	chr3:57736057-57835425:+	11.9966	12.0196	11.6272	12.0945	11.9449	11.8006	12.0027	11.8365	12.1623	12.1077	12.0583	12.1612
Fam210b	67017	chr2:172345577-172355749:+	12.0869	11.9911	12.514	12.1765	12.5072	12.883	12.4106	12.8182	12.0666	12.193	12.1456	12.161
Oplah	75475	chr15:76296603-76307245:-	12.2851	12.3401	12.1613	12.5279	12.3436	12.2366	12.4998	12.3532	12.1378	12.4247	12.2869	12.1603
Agxt2	268782	chr15:10358533-10410153:+	12.0366	11.9968	11.7486	12.1141	12.0544	12.0835	12.1021	12.1424	12.202	12.1389	12.0015	12.1587
Gldc	104174	chr19:30098441-30175441:-	11.9289	11.6497	11.9848	11.8011	12.2408	12.4806	11.9999	12.3677	11.8712	11.6824	11.872	12.1572
Sec16a	227648	chr2:26409431-26445216:-	12.2971	12.2431	12.6217	12.3834	12.4211	12.6007	12.1822	12.6011	12.2018	12.1654	12.1345	12.1559
Pisd-ps3	66776	chrUn_JH584304:52674-59689:-	12.2086	12.2471	11.5517	12.0911	12.0955	12.0013	11.9827	11.9701	12.262	12.0184	12.2958	12.1552
Hint1	15254	chr11:54866438-54870496:+	12.0841	12.1955	11.9835	12.0167	11.8978	11.9542	12.0193	11.9165	12.1208	12.1248	12.2438	12.1535
Rab1a	19324	chr11:20201602-20226856:+	12.2926	12.2936	12.4658	12.2986	12.2751	12.5308	12.2137	12.3895	12.2373	12.1979	12.3005	12.1501
Slc41a2	338365	chr10:83231139-83337817:-	11.9327	12.0423	12.5872	12.313	12.0095	12.1133	11.8556	12.028	12.0059	11.8908	11.7828	12.1466
Rps7	20115	chr12:28630847-28635953:-	12.1732	12.2735	12.3001	12.0142	12.085	12.2486	12.1696	12.2065	12.1858	12.1297	12.2367	12.1435
Pcbp2	18521	chr15:102470632-102500059:+	11.7972	11.8189	11.8579	11.8288	11.682	11.6748	11.7686	11.6475	11.8689	11.9248	11.9482	12.1428
Cox8a	12868	chr19:7215158-7217616:-	11.9928	12.2	11.7064	11.9782	11.9222	11.8981	12.0145	11.804	12.1255	12.1525	12.2539	12.1374
Zfp36l1	12192	chr12:80107760-80113013:-	12.045	11.5974	12.2611	12.0658	12.1849	11.8532	11.9778	12.0258	12.1569	11.8286	12.1907	12.1369
Ivns1abp	117198	chr1:151344498-151364445:+	12.298	12.2985	11.9364	12.4046	12.1116	11.9621	12.1901	12.1021	12.0228	12.1567	11.9104	12.1364
Ndufb9	66218	chr15:58933810-58939489:+	11.987	12.0568	11.8208	11.9739	11.8513	11.9241	12.0562	11.8364	12.0971	12.1317	12.2546	12.1363
Pfn1	18643	chr11:70651847-70654650:-	12.2166	12.3906	12.2513	12.1432	12.0459	12.2619	12.152	12.1357	12.1142	12.0997	12.3162	12.1333
Tex2	21763	chr11:106502139-106612930:-	12.1864	12.1541	12.0745	12.2874	12.2047	12.1736	12.1688	12.1658	12.2373	12.204	12.2565	12.1325
Brap	72399	chr5:121660563-121687249:+	11.8388	11.8337	11.7258	12.1843	11.7211	11.5702	11.9066	11.5346	11.9893	12.0602	12.0153	12.1308
Suclg1	56451	chr6:73248505-73276907:+	11.9475	11.9923	11.501	12.0447	11.8294	11.6684	11.9744	11.7699	12.1581	12.2323	12.2669	12.1286
Scap	235623	chr9:110333288-110384949:+	11.8329	11.7545	11.5931	12.0349	12.0151	11.8392	11.9124	11.8372	12.004	12.0197	12.0466	12.1278
Adh4	26876	chr3:138415497-138430892:+	12.0523	12.0109	10.2137	12.3213	11.9645	10.6397	12.1477	11.2387	12.2025	12.3536	12.3263	12.1268
Cds2	110911	chr2:132263148-132312050:+	11.7434	11.7104	11.3136	11.839	11.8054	11.4404	11.7846	11.6094	11.9022	11.8955	11.8519	12.1244
Atp5j	11957	chr16:84827871-84835625:-	12.044	12.1246	11.679	12.0035	11.8295	11.8006	12.0386	11.8038	12.1614	12.1173	12.225	12.1243
Eif3a	13669	chr19:60761116-60790693:-	12.1034	12.0321	12.4778	12.1713	12.1989	12.379	12.0707	12.3185	12.1961	12.0235	12.0983	12.1224
Gch1	14528	chr14:47153895-47189402:-	11.7455	11.674	11.5166	11.9197	11.653	11.2769	11.5979	11.296	12.1956	12.0133	12.0792	12.1208
Igfbp2	16008	chr1:72824480-72852471:+	11.591	11.86	10.1113	11.7435	11.7885	10.3621	11.4821	10.704	12.1814	11.9757	12.2619	12.1207
Eprs	107508	chr1:185363044-185428360:+	12.0042	11.9794	12.1529	12.1673	12.0422	12.0564	11.9529	12.0684	12.0048	11.9596	11.9444	12.117
Id2	15902	chr12:25093799-25096092:-	11.2443	11.343	12.21	11.7988	11.9087	11.5594	11.7441	11.7124	12.1869	12.0369	12.0356	12.1135
Pglyrp2	57757	chr17:32412461-32424167:-	11.67	11.6739	11.7105	11.8193	12.0086	12.1367	11.7366	12.0751	11.819	11.7868	11.6898	12.1122
Bzw1	66882	chr1:58393136-58406548:+	11.9618	11.9122	12.215	12.126	11.9145	12.0811	11.9074	12.0449	11.9809	11.998	11.9275	12.1102
Rab14	68365	chr2:35180205-35201120:-	11.9731	11.9159	11.8196	12.103	11.9513	11.8982	12.031	11.8901	12.0728	12.0521	12.0442	12.1086
F7	14068	chr8:13026034-13035805:+	12.1231	12.2646	11.1239	12.1569	11.9595	11.4087	11.8242	11.7919	12.2067	12.135	12.0763	12.1068
Trip12	14897	chr1:84721189-84839304:-	12.0358	11.9304	12.2121	12.126	12.1461	12.2473	12.0384	12.2676	12.0965	12.027	11.9624	12.1054
Dnajb11	67838	chr16:22857845-22879634:+	12.1078	12.4056	12.9243	12.0493	12.5494	13.0671	12.182	12.9221	12.2318	12.1548	12.2966	12.1036
Chuk	12675	chr19:44073334-44107477:-	11.7745	11.7228	12.0665	12.0389	11.86	11.9226	11.8958	11.79	12.0605	12.1431	12.0475	12.1024
Etnppl	71760	chr3:130617448-130635750:+	10.9333	10.2929	9.09192	10.8709	9.7208	8.6297	9.99329	9.11015	11.1833	11.1091	11.0202	12.1021
Ehhadh	74147	chr16:21761285-21787834:-	11.6918	11.652	11.458	12.0537	12.1788	11.5018	12.5299	11.9058	12.0426	11.9813	12.1914	12.1016
St3gal1	20442	chr15:67102875-67176882:-	12.1148	12.0359	12.3684	11.9902	12.173	12.1764	12.0827	12.1036	12.2552	12.0256	11.9846	12.101
Cyc1	66445	chr15:76343523-76345934:+	11.9952	12.0242	11.4897	12.041	11.759	11.6116	11.9889	11.513	12.1275	12.1506	12.1933	12.0984
Nckap1	50884	chr2:80500512-80581182:-	11.9714	11.8777	12.2538	12.1464	12.1097	12.1407	12.0775	12.0617	12.0344	12.0385	11.9382	12.0974
Slc40a1	53945	chr1:45908070-45925594:-	12.1086	12.1092	11.7223	11.8809	11.7714	11.4382	11.7018	11.8764	11.6893	12.0006	11.8728	12.0973
Atxn7l3b	382423	chr10:112925428-112929026:-	12.0739	12.0314	12.0944	12.1205	12.1273	12.1869	12.1064	12.2246	12.0499	12.0664	11.9508	12.0971
Amacr	17117	chr15:10981756-10996624:+	11.8251	11.8415	11.2996	12.1267	11.7714	11.759	11.9753	11.7777	12.0559	12.2108	12.1472	12.0966
Aamp	227290	chr1:74279840-74284738:-	12.026	12.103	11.9383	12.047	11.9671	11.9583	12.0225	11.9324	12.0359	12.104	12.1691	12.0952
Tomm70a	28185	chr16:57121714-57154530:+	11.9735	11.963	11.8291	12.1851	12.0667	11.8602	12.11	11.9181	12.0411	12.1516	12.0403	12.0938
Pnpla8	67452	chr12:44269154-44313435:+	11.8933	11.8616	12.2425	12.1883	12.0626	12.1756	12.1911	12.1304	12.0874	12.1715	12.0268	12.0935
Lonp1	74142	chr17:56614298-56626903:-	11.8526	11.912	11.7133	11.9706	11.7154	11.6804	11.7937	11.6442	12.0429	12.1555	12.1003	12.0909
Pten	19211	chr19:32757577-32826160:+	11.9	11.7972	11.8625	12.0368	11.8875	11.784	11.859	11.8669	12.0155	12.0217	11.8829	12.0891
Rhoa	11848	chr9:108306160-108337943:+	12.077	12.1045	12.0473	12.0778	11.9755	11.9542	12.0735	11.9242	12.0547	12.0577	12.0869	12.0889
Pcbp1	23983	chr6:86524480-86526189:-	12.2814	12.2146	12.2258	12.2316	12.0145	12.12	12.0386	12.0319	12.1425	12.0431	12.2021	12.0883
Acadsb	66885	chr7:131410601-131446211:+	11.8107	11.7703	11.0131	11.9778	11.6332	11.2667	11.741	11.5805	12.0091	11.9636	11.9305	12.0882
Decr1	67460	chr4:15917240-15945507:-	12.1376	12.322	12.4663	12.3985	12.347	12.4053	12.7203	12.5578	12.266	12.6352	12.532	12.0876
Vkorc1	27973	chr7:127893063-127895617:-	11.9984	12.2467	11.5068	11.9683	11.9955	11.8096	11.9999	11.9722	12.1774	12.1878	12.3681	12.0805
Aco2	11429	chr15:81872463-81915137:+	12.0846	11.9955	11.8463	12.1621	12.0073	11.9858	12.4358	12.0026	12.0679	12.0996	12.155	12.0757
Rcl1	59028	chr19:29101375-29143843:+	11.8315	11.8675	12.4072	11.8112	12.1227	12.571	12.0123	12.2505	11.9346	11.8857	12.034	12.0757
Trap1	68015	chr16:4039977-4077810:-	11.8293	11.7942	11.5792	11.9678	11.7225	11.7046	11.7906	11.6747	12.0701	12.1744	12.1404	12.0746
Prkar1a	19084	chr11:109649405-109669663:+	11.9108	11.8976	12.2711	11.9732	11.8544	12.0931	11.946	11.9545	11.912	11.9225	11.9357	12.0735
Fdft1	14137	chr14:63145151-63179578:-	11.8941	11.6167	11.9621	11.8479	12.4575	12.5977	12.2704	12.2757	12.0706	12.157	12.3341	12.0716
Prodh	19125	chr16:18071726-18089190:-	12.3496	12.2544	10.3472	12.339	11.884	10.9201	12.0276	11.2278	12.4475	12.2941	12.2096	12.0714
Tecr	106529	chr8:83571698-83594491:-	12.0402	12.0047	11.3766	11.9633	11.784	11.6869	11.9303	11.7356	12.0773	12.0506	12.192	12.0704
Gm4951	240327	chr18:60212077-60247820:+	11.8315	11.558	11.1236	12.0871	11.8338	11.3942	11.8027	11.7399	12.038	11.9443	11.8209	12.0656
9530068E07Rik	213673	chr11:52396428-52408723:+	11.9199	11.9116	11.9091	12.0182	11.8403	11.8223	11.9493	11.7614	11.9648	12.0282	12.0174	12.0631
Gpi1	14751	chr7:34201327-34230336:-	11.9341	11.8608	11.9569	11.9307	11.7862	11.5531	11.9894	11.5684	11.9762	11.9458	12.0793	12.0628
Zcchc24	71918	chr14:25711640-25768856:-	11.9897	12.0248	11.7282	12.2008	11.9605	11.7999	11.9369	11.9593	12.0717	12.1265	12.0361	12.0595
Actn4	60595	chr7:28893254-28962280:-	12.0936	11.9285	12.1535	12.1223	12.2581	12.256	12.0562	12.313	11.9385	11.9375	11.928	12.0579
Tcp1	21454	chr17:12916329-12925067:+	11.9091	11.8112	11.7804	11.9854	11.7456	11.5802	11.798	11.6869	11.9063	11.9023	11.9082	12.0568
Tnfrsf1a	21937	chr6:125349723-125362483:+	12.0434	12.2706	12.4564	12.1391	12.2147	12.2116	12.2745	12.078	12.0698	12.1047	11.8793	12.0536
Rps23	66475	chr13:90923122-90924732:+	12.0855	12.23	12.1895	11.8762	11.9607	12.1163	12.0637	12.0159	12.0436	12.0046	12.2031	12.0536
Epb41	269587	chr4:131923427-132075313:-	11.9953	12.02	12.62	12.2844	12.0998	12.6246	12.0875	12.35	11.9951	12.0271	12.0088	12.0525
Snd1	56463	chr6:28480348-28888832:+	11.96	11.9099	12.3157	12.04	12.0424	12.3821	11.8035	12.2283	11.9237	11.8903	12.0641	12.0514
Cpt2	12896	chr4:107903982-107923589:-	11.9952	12.1268	12.1719	12.2539	12.0531	12.3938	12.2824	12.1941	12.1059	12.3081	12.3917	12.0508
Ap2m1	11773	chr16:20535480-20544909:+	12.0602	12.0529	12.1308	12.0443	12.0562	12.1768	11.98	12.0935	11.9886	12.0138	12.0714	12.0506
Rplp2	67186	chr7:141447650-141451342:+	12.1997	12.3024	12.4331	11.9674	12.1448	12.4698	12.2487	12.3316	12.0322	12.0332	12.2356	12.0506
Tmem19	67226	chr10:115340740-115362262:-	12.3544	12.2881	11.7303	12.4157	12.1468	11.8243	12.2535	12.011	12.3611	12.3871	12.3016	12.0491
Hsd3b3	15494	chr3:98741476-98763128:-	11.5518	11.2238	8.49367	11.7834	10.6977	8.61796	11.0818	9.29663	12.0261	11.8325	12.0929	12.0489
Gm10768	100038628	chr19:43838803-43840845:+	12.03	11.9182	11.0263	11.8765	11.8054	11.3685	11.8735	11.5135	12.0616	12.036	12.1013	12.048
Sec31a	69162	chr5:100361649-100416234:-	12.181	12.1663	12.3773	12.2468	12.2142	12.355	11.9734	12.2982	12.0742	12.0201	12.1574	12.0465
Nat8f1	66116	chr6:85910154-85915677:-	11.723	11.6461	10.1628	11.7218	10.939	10.1842	11.2466	10.4767	12.193	11.9401	12.236	12.0426
Cyp4f15	106648	chr17:32685631-32703352:+	11.7592	11.7599	10.2876	12.073	11.6125	11.0511	11.766	11.3467	12.0704	11.9792	11.9792	12.0421
Faah	14073	chr4:115996656-116017902:-	11.8674	11.8007	10.5561	12.0099	11.7966	10.746	11.814	11.4127	12.0135	12.0396	12.0251	12.0416
Ninj1	18081	chr13:49187547-49196251:+	12.1948	12.3619	11.9371	12.1413	12.1877	12.0799	12.1288	12.0493	12.1616	12.1057	12.2355	12.0377
Saraf	67887	chr8:34154563-34170847:+	11.9247	12.0034	12.0955	11.9611	12.0553	12.1949	12.0275	12.1946	11.962	11.9724	12.045	12.0351
Ppp1r15b	108954	chr1:133131166-133139800:+	12.0731	11.9995	11.9926	12.1472	11.9376	11.8866	11.9558	11.9634	12.0433	12.1366	12.0252	12.0333
Psmb4	19172	chr3:94884324-94886958:-	12.021	12.1425	12.1235	12.0609	11.8861	12.1751	12.0042	11.8878	12.0673	12.0327	12.1553	12.0331
Abcb4	18670	chr5:8893721-8959226:+	11.9519	12.0156	12.2542	12.3954	12.2701	12.0986	12.3953	12.126	12.2505	12.4983	12.4185	12.032
Pex5	19305	chr6:124396816-124415067:-	12.0454	12.0392	11.7085	12.098	11.9336	11.8451	11.98	11.9023	12.0431	12.1307	12.1184	12.0315
Dnaja1	15502	chr4:40722468-40734965:+	12.4225	12.2569	11.5429	12.3597	12.0554	11.5774	12.1396	11.7038	12.1845	12.1589	12.1109	12.0302
Keg1	64697	chr19:12695790-12719896:+	11.3264	10.9809	8.43787	11.4825	10.8019	8.80357	11.0083	9.60604	11.8565	11.7563	12.0093	12.0293
Pbld2	67307	chr10:63024512-63058812:+	12.0873	11.9119	10.1235	12.1178	11.8164	10.5414	11.9303	11.1108	12.1632	12.1881	12.3065	12.0261
Rpl24	68193	chr16:55966275-55971437:+	12.0605	12.2065	12.062	11.9344	11.8346	12.0552	12.0298	11.8889	12.0494	11.9878	12.1402	12.0186
Serbp1	66870	chr6:67266979-67289302:+	11.9604	12.014	12.1293	12.1031	11.9166	12.0489	12.0694	11.9709	11.9818	11.9455	12.0042	12.018
Cdc42	12540	chr4:137319696-137357759:-	11.9925	11.9788	12.1742	11.9743	11.9108	12.0835	11.9976	11.9817	11.9536	11.994	12.0031	12.0168
Sfxn1	14057	chr13:54071845-54108345:+	11.9814	12.0381	11.9983	12.13	11.917	11.9882	11.899	12.0672	11.771	11.8317	11.928	12.0155
Hsd17b12	56348	chr2:94032697-94157909:-	11.9687	11.9899	12.2156	12.144	12.0237	12.3322	12.1231	12.2374	12.0817	12.1943	12.1363	12.012
H3f3b	15081	chr11:116021961-116024504:-	12.1277	12.1633	12.5638	12.252	11.9562	12.394	12.1642	12.1142	12.0873	12.0488	12.1609	12.0096
Ceacam1	26365	chr7:25461702-25477625:-	11.9042	11.8419	11.7356	12.0243	12.0137	12.1421	11.9417	12.1777	11.9613	11.9761	11.8551	12.0062
Ppib	19035	chr9:66060169-66066629:+	12.015	12.0633	12.4826	11.9385	12.385	12.659	12.1343	12.602	12.0867	11.9641	12.1204	12.0051
Nit2	52633	chr16:57156665-57167332:-	11.8342	11.7936	10.3445	11.8197	11.4829	10.7329	11.5863	11.1475	12.0694	12.0165	12.028	12.0029
2900026A02Rik	243219	chr5:113086323-113163313:-	11.4965	11.6239	11.9832	11.6911	11.8628	11.4607	11.6955	11.4776	11.8326	11.8602	11.8236	12.0021
Ddx6	13209	chr9:44604892-44640731:+	12.0047	11.9303	12.0458	12.0223	12.0129	12.1044	11.9332	12.1666	11.9941	11.9987	11.9198	12.0019
Hs6st1	50785	chr1:36068400-36106446:+	12.2232	12.2079	12.1401	12.0561	12.1863	11.8927	12.0501	11.9637	12.0711	12.0861	11.9306	12.0013
Rpl27a	26451	chr7:109519195-109522369:+	12.0606	12.1939	12.1699	11.9157	11.9809	12.2205	12.0292	12.0243	12.1042	11.9968	12.2159	12.0011
Psen2	19165	chr1:180227004-180256300:-	12.0639	12.0208	11.2731	11.9356	11.9595	11.9746	11.8989	12.0719	12.2138	12.0757	12.1936	12.0004
Serpina11	380780	chr12:103980243-103989957:-	12.0984	12.2718	12.4482	12.0924	12.2329	12.447	12.1939	12.4829	12.0761	12.1021	12.0616	12
Evi5	14020	chr5:107744795-107875107:-	11.6942	11.5105	11.624	11.8116	11.8313	11.7392	11.719	11.864	11.9027	11.8067	11.7652	11.9997
Dync1h1	13424	chr12:110601395-110666944:+	11.9606	11.8551	12.2172	12.0086	11.9934	11.8995	12.0174	11.9525	11.9276	12.0246	11.8558	11.999
Fmo1	14261	chr1:162829561-162866610:-	11.8083	11.6735	10.7736	11.8986	11.8816	11.4362	11.7464	11.8545	12.0244	11.8727	12.0689	11.997
Sec62	69276	chr3:30792876-30821263:+	12.0115	12.0024	11.9212	12.0807	11.9438	11.9362	12.0093	12.0064	12.102	12.0483	12.0101	11.9966
Arhgap35	232906	chr7:16494473-16614993:-	11.7913	11.6649	11.9268	11.9059	11.9395	11.9891	11.868	12.1193	11.9043	12.0379	11.8844	11.9956
Slc19a2	116914	chr1:164249046-164265385:+	11.7361	11.4532	11.2902	11.8225	11.871	11.487	11.7387	11.5676	12.1124	11.9734	11.9485	11.9947
Mmd	67468	chr11:90249476-90278573:+	12.1392	12.2287	12.0764	12.3245	12.3527	12.072	12.5402	12.2672	12.2635	12.4572	12.3054	11.9946
Ubqln1	56085	chr13:58176156-58215653:-	12.1659	11.9842	12.0135	12.1954	12.1617	12.1176	12.1295	12.0699	12.0764	11.997	12.0603	11.9946
Rab43	69834	chr6:87788853-87812164:-	12.0794	12.1295	11.7203	12.4875	12.0759	11.864	12.1214	11.8211	12.2407	12.4794	12.4326	11.9943
Cox6c	12864	chr15:35931976-35938246:-	11.9099	11.9799	11.6723	11.8073	11.6976	11.7304	11.9261	11.6747	12.0273	12.0405	12.1835	11.994
Plec	18810	chr15:76170974-76231378:-	11.8023	11.7921	12.5277	11.8469	12.0568	12.202	12.0058	12.2494	11.7408	11.7271	11.6544	11.9935
Atp5h	71679	chr11:115415697-115419919:-	11.8717	11.9331	11.459	11.7749	11.6685	11.6177	11.8312	11.5832	11.9425	11.9226	12.1087	11.9927
Ctsa	19025	chr2:164832872-164841032:+	12.167	12.2373	11.88	12.05	12.0398	11.9525	12.0456	12.063	12.0617	12.1156	12.084	11.9925
Gys2	232493	chr6:142422613-142473109:-	11.4147	11.6561	11.0127	11.8866	11.3131	11.1189	11.5659	11.4191	11.6971	11.8911	11.7888	11.9899
Cyp2c67	545288	chr19:39608859-39649042:-	11.8016	11.8272	9.9745	11.8831	11.4855	10.3603	11.7042	10.734	12.1032	12.154	11.8688	11.9895
Helz2	229003	chr2:181227615-181242027:-	11.9988	11.8714	12.1651	12.1045	12.0857	12.0316	11.8544	12.1668	12.0051	11.9471	11.9459	11.9885
BC005537	79555	chr13:24801657-24812899:+	11.8779	11.6226	11.771	11.8883	11.8049	11.7066	11.7866	11.7465	11.841	11.934	11.8769	11.9868
Atl3	109168	chr19:7494040-7538609:+	11.8624	11.6779	11.4745	11.9674	11.9655	11.7187	11.8768	11.8504	11.9555	11.9976	11.8514	11.9862
Aldh3a2	11671	chr11:61223417-61267528:-	12.1462	12.1207	10.7315	12.4984	11.8829	10.8683	12.4838	11.2805	12.4145	13.0338	12.781	11.9858
Sdf4	20318	chr4:155992843-156013610:+	11.9516	12.0363	12.0196	12.0058	12.0063	12.0314	12.06	12.1047	11.9701	12.0649	12.065	11.9838
Sar1b	66397	chr11:51763663-51791953:+	11.9826	11.9213	11.4184	12.0776	11.878	11.6597	12.1262	11.8532	12.0667	12.1298	12.2257	11.9757
Slc38a10	72055	chr11:120103951-120151351:-	12.151	12.1941	12.5726	12.179	12.5015	12.9789	12.3525	12.858	12.1698	12.2242	12.1955	11.9726
Nfe2l1	18023	chr11:96817414-96829968:-	12.1286	12.0837	12.195	12.2241	12.2836	12.4014	12.5674	12.3543	12.1171	12.3305	12.1376	11.9725
[truncated: 24,637 more rows]
