# Supplementary figures and images for: Dichloroacetate reverses sepsis-induced hepatic metabolic dysfunction
Source: eLife journal article supplement (doi:10.7554/elife.64611), 2021-02-22

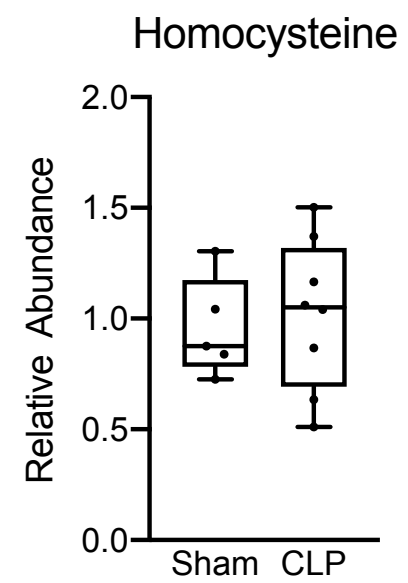

Supplement: supp [file elife_poa_e64611_Figure_2_figure_supplement_1.pdf › elife_poa_e64611_Figure_2_figure_supplement_1.pdf]

**A**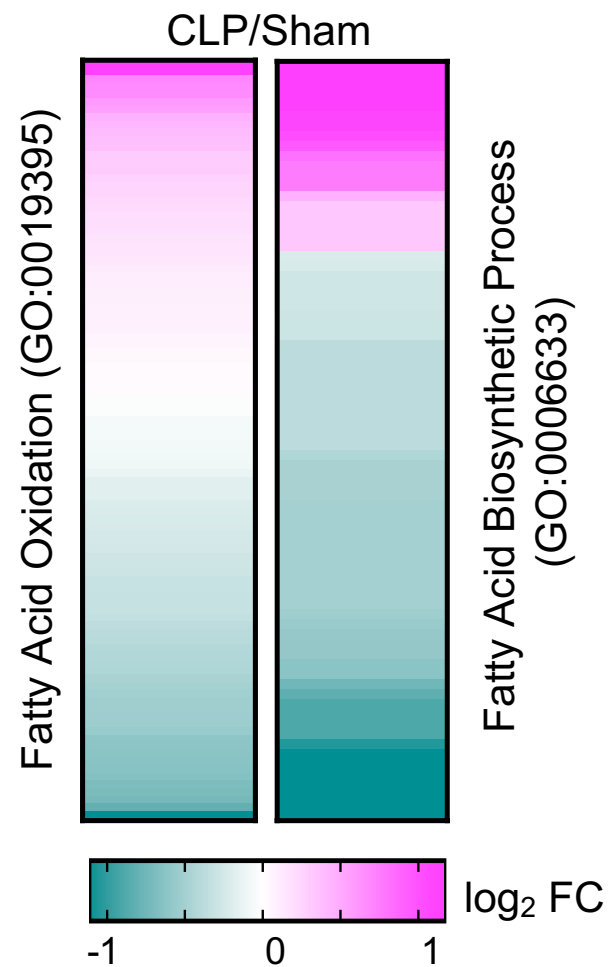**B**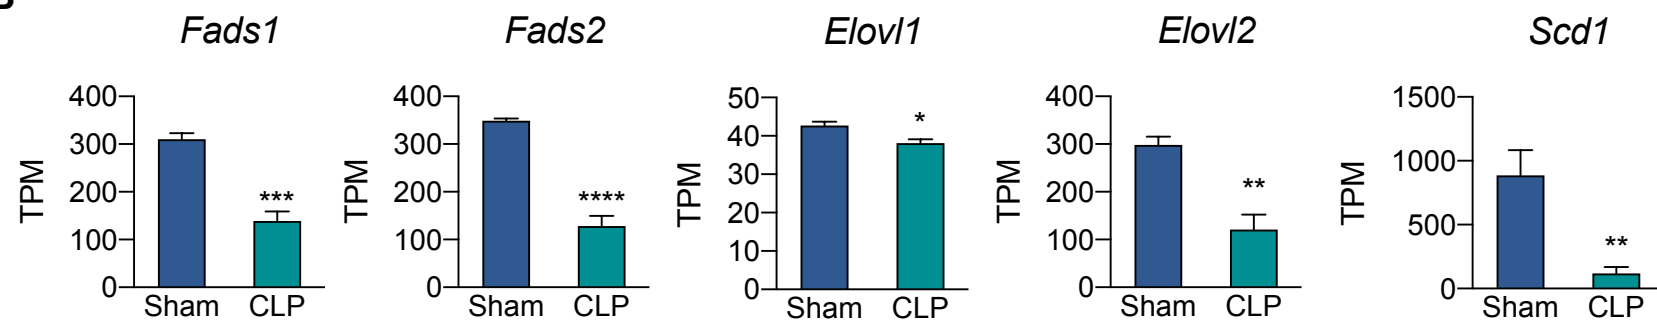

Supplement: supp [file elife_poa_e64611_Figure_3_figure_supplement_1.pdf › elife_poa_e64611_Figure_3_figure_supplement_1.pdf]

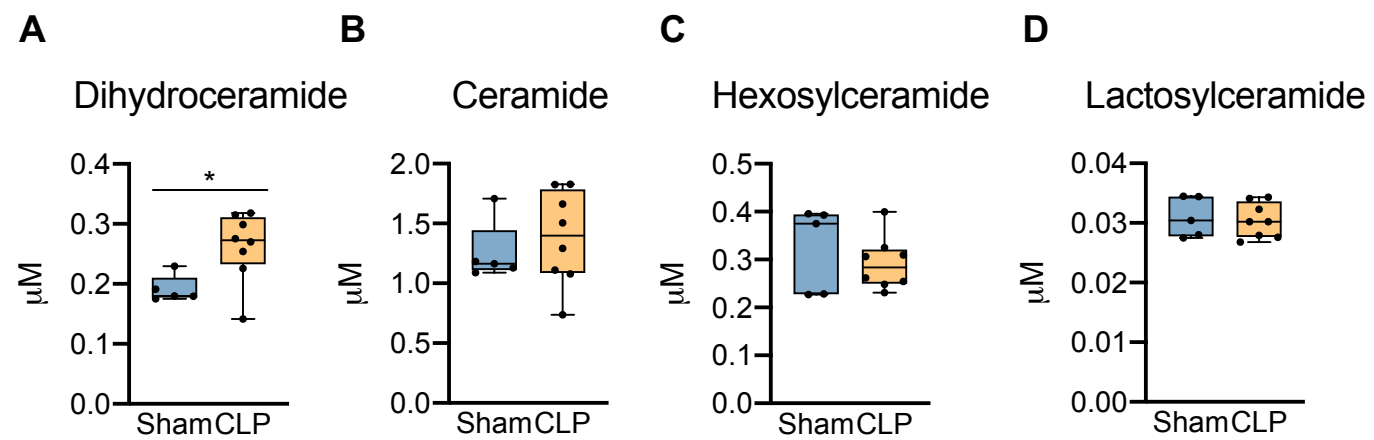

Supplement: supp [file elife_poa_e64611_Figure_4_figure_supplement_1.pdf › elife_poa_e64611_Figure_4_figure_supplement_1.pdf]

**A**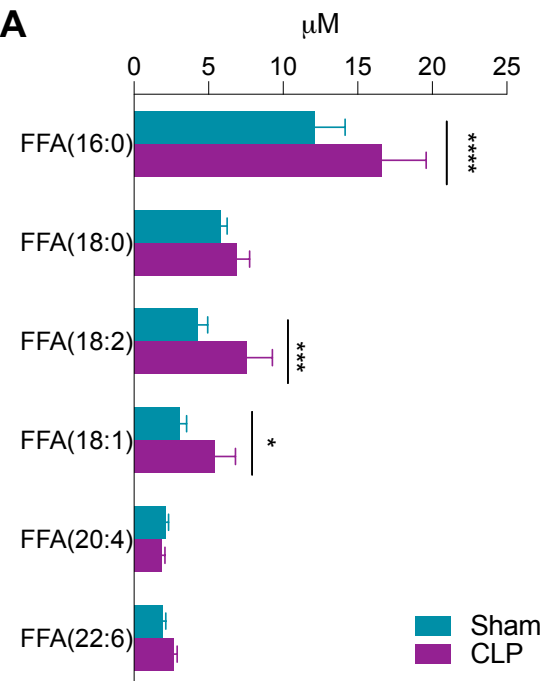**B**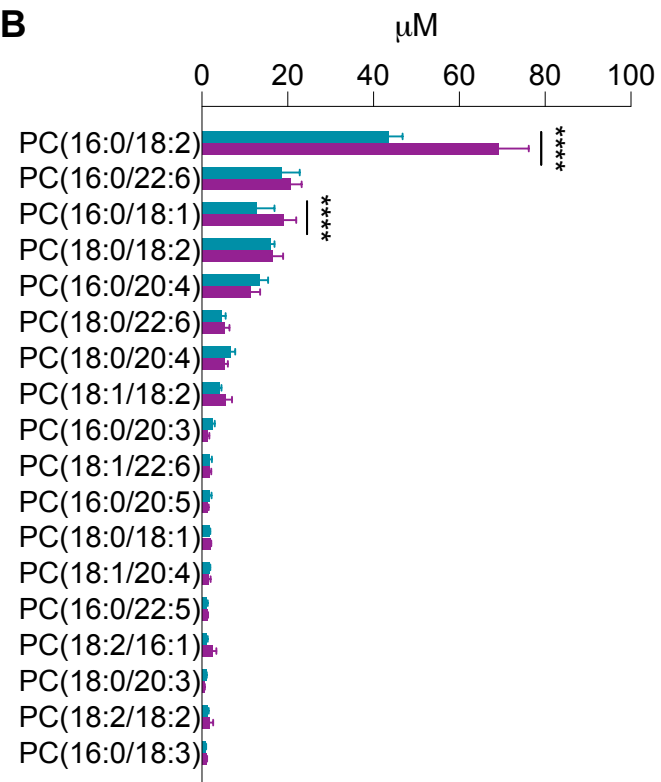**C**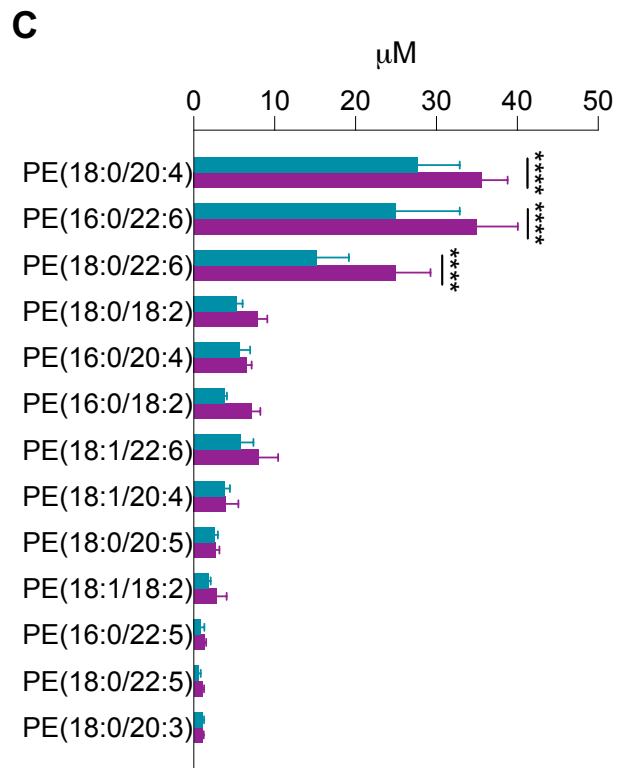**D**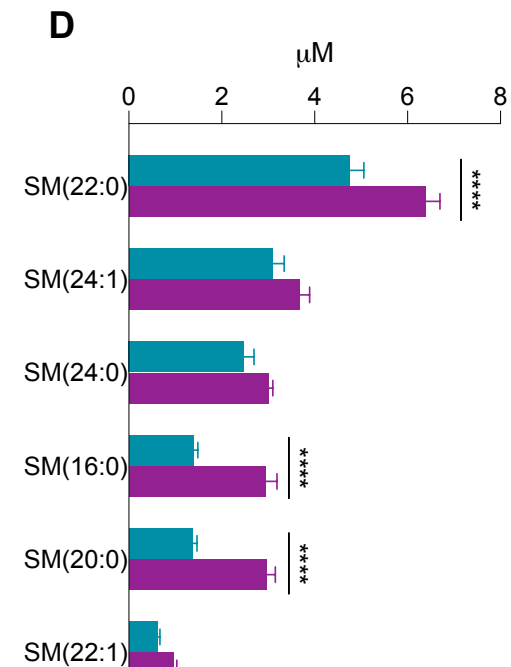

Supplement: supp [file elife_poa_e64611_Figure_4_figure_supplement_2.pdf › elife_poa_e64611_Figure_4_figure_supplement_2.pdf]

**A**

Phosphatidylinositol

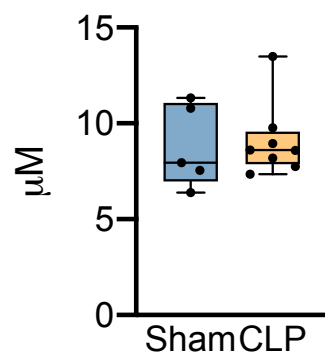**B**

Lysophosphatidylethanolamine

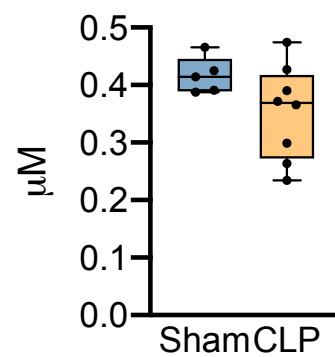**C**

Cholesterol Ester

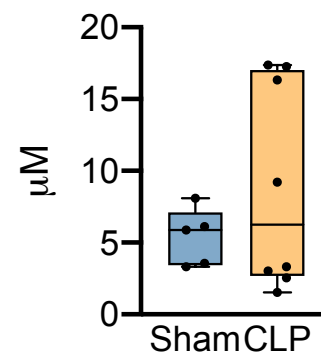

Supplement: supp [file elife_poa_e64611_Figure_4_figure_supplement_3.pdf › elife_poa_e64611_Figure_4_figure_supplement_3.pdf]
